# Supplementary material for: A Mass Spectrometric-Derived Cell Surface Protein Atlas
Source: PLoS One. 2015 Apr 20;10(4):e0121314. doi: 10.1371/journal.pone.0121314 (PMC4404347; doi:10.1371/journal.pone.0121314)
Supplement: S1 File — Excel file containing 6 tables organized in different sheets. A. List of all proteins identified within the different cell types. B. Matrix of 1492 human proteins against 47 human cell types. C. Matrix of 1296 human proteins against 31 human cell types. D. Table containing the number of identified proteins of each cell type. E. Matrix with human surfaceome proteins and cells and their estimated relative quantities in log2 scale. F. Matrix with mouse surfaceome proteins and cells and their estimated relative quantities in log2 scale. (XLSX) [file pone.0121314.s002.xlsx]

## Sheet: Table_A
organism	Experiment tag	ID_link	CD	ENTREZ ac	ENTREZ gene symbol	UP_entry_name	count detection in different cell types	protein probability	num unique peps
Human	CD4+, CD25- Tcells	A1A5B4	no	338440	ANO9	ANO9_HUMAN	8	1	2
Human	MedB-1	A1A5B4	no	338440	ANO9	ANO9_HUMAN	8	1	2
Human	A-431	A1A5B4	no	338440	ANO9	ANO9_HUMAN	8	0.9935	1
Human	HBL-1	A1A5B4	no	338440	ANO9	ANO9_HUMAN	8	0.9905	1
Human	HDLM-2	A1A5B4	no	338440	ANO9	ANO9_HUMAN	8	0.9945	1
Human	NK cells	A1A5B4	no	338440	ANO9	ANO9_HUMAN	8	0.991	1
Human	SU-DHL-6	A1A5B4	no	338440	ANO9	ANO9_HUMAN	8	0.9895	1
Human	ZL55 MPM	A1A5B4	no	338440	ANO9	ANO9_HUMAN	8	0.9909	1
Human	HEK	A1A5C7	no	63027	SLC22A23	S22AN_HUMAN	4	1	2
Human	PASMC	A1A5C7	no	63027	SLC22A23	S22AN_HUMAN	4	1	2
Human	Glioblastoma exvivo	A1A5C7	no	63027	SLC22A23	S22AN_HUMAN	4	0.9939	1
Human	SDM104	A1A5C7	no	63027	SLC22A23	S22AN_HUMAN	4	0.9942	1
Mouse	J1_EB	A2A699	no	217219	Fam171a2	F1712_MOUSE	7	0.9968	1
Mouse	J1_neurons	A2A699	no	217219	Fam171a2	F1712_MOUSE	7	0.997	1
Mouse	Neural stem cells (forebrain)	A2A699	no	217219	Fam171a2	F1712_MOUSE	7	0.9942	1
Mouse	Neural stem cells (spinal cord)	A2A699	no	217219	Fam171a2	F1712_MOUSE	7	0.9969	1
Mouse	R1_defNCS 2°	A2A699	no	217219	Fam171a2	F1712_MOUSE	7	0.9212	1
Mouse	R1_primNCS 1°	A2A699	no	217219	Fam171a2	F1712_MOUSE	7	0.9969	1
Mouse	SMA560	A2A699	no	217219	Fam171a2	F1712_MOUSE	7	0.9133	1
Mouse	GL261	A2A6M5	no	76815	Calcoco2	CACO2_MOUSE	1	0.9811	1
Mouse	Astroglia	A2A863	CD104	192897	Itgb4	ITB4_MOUSE	2	1	4
Mouse	GL261	A2A863	CD104	192897	Itgb4	ITB4_MOUSE	2	0.9957	1
Mouse	159-2 ES	A2A8L5	no	19268	Ptprf	PTPRF_MOUSE	16	1	9
Mouse	159-2 EB	A2A8L5	no	19268	Ptprf	PTPRF_MOUSE	16	1	7
Mouse	R1_EB	A2A8L5	no	19268	Ptprf	PTPRF_MOUSE	16	1	5
Mouse	D3_ES	A2A8L5	no	19268	Ptprf	PTPRF_MOUSE	16	1	4
Mouse	R1_ES	A2A8L5	no	19268	Ptprf	PTPRF_MOUSE	16	1	4
Mouse	159-2 NP	A2A8L5	no	19268	Ptprf	PTPRF_MOUSE	16	1	3
Mouse	Astroglia	A2A8L5	no	19268	Ptprf	PTPRF_MOUSE	16	0.9999	2
Mouse	MSC80	A2A8L5	no	19268	Ptprf	PTPRF_MOUSE	16	1	2
Mouse	E14Tg2a	A2A8L5	no	19268	Ptprf	PTPRF_MOUSE	16	0.9951	1
Mouse	GL261	A2A8L5	no	19268	Ptprf	PTPRF_MOUSE	16	0.9957	1
Mouse	J1_EB	A2A8L5	no	19268	Ptprf	PTPRF_MOUSE	16	0.9971	1
Mouse	J1_NP	A2A8L5	no	19268	Ptprf	PTPRF_MOUSE	16	0.9975	1
Mouse	Min6	A2A8L5	no	19268	Ptprf	PTPRF_MOUSE	16	0.9941	1
Mouse	Neural stem cells (spinal cord)	A2A8L5	no	19268	Ptprf	PTPRF_MOUSE	16	0.9972	1
Mouse	R1_defNCS 2°	A2A8L5	no	19268	Ptprf	PTPRF_MOUSE	16	0.996	1
Mouse	R1_primNCS 1°	A2A8L5	no	19268	Ptprf	PTPRF_MOUSE	16	0.9979	1
Mouse	Min6	A2AFS3	no	0	Kiaa1324	K1324_MOUSE	2	1	2
Mouse	MSC80	A2AFS3	no	0	Kiaa1324	K1324_MOUSE	2	0.8665	1
Mouse	D3_ES	A2AJN7	no	269356	Slc4a11	S4A11_MOUSE	4	1	3
Mouse	R1_ES	A2AJN7	no	269356	Slc4a11	S4A11_MOUSE	4	1	2
Mouse	2D4-iPS	A2AJN7	no	269356	Slc4a11	S4A11_MOUSE	4	0.9966	1
Mouse	TTF-1_iPS	A2AJN7	no	269356	Slc4a11	S4A11_MOUSE	4	0.9946	1
Mouse	Adipocytes subcutaneous	A2AJQ3	no	381510	Dpy19l4	D19L4_MOUSE	4	0.9908	2
Mouse	J1_EB	A2AJQ3	no	381510	Dpy19l4	D19L4_MOUSE	4	0.9713	1
Mouse	J1_neurons	A2AJQ3	no	381510	Dpy19l4	D19L4_MOUSE	4	0.9937	1
Mouse	Neural stem cells (SVZ)	A2AJQ3	no	381510	Dpy19l4	D19L4_MOUSE	4	0.9924	1
Mouse	MSC80	A2ARA8	no	241226	Itga8	ITA8_MOUSE	1	0.9999	2
Mouse	R1_primNCS 1°	A2ARI4	no	107515	Lgr4	LGR4_MOUSE	9	1	3
Mouse	R1_defNCS 2°	A2ARI4	no	107515	Lgr4	LGR4_MOUSE	9	1	2
Mouse	2D4-iPS	A2ARI4	no	107515	Lgr4	LGR4_MOUSE	9	0.9966	1
Mouse	C2C12	A2ARI4	no	107515	Lgr4	LGR4_MOUSE	9	0.9934	1
Mouse	D3_ES	A2ARI4	no	107515	Lgr4	LGR4_MOUSE	9	0.995	1
Mouse	GL261	A2ARI4	no	107515	Lgr4	LGR4_MOUSE	9	0.9957	1
Mouse	J1_EB	A2ARI4	no	107515	Lgr4	LGR4_MOUSE	9	0.9971	1
Mouse	J1_neurons	A2ARI4	no	107515	Lgr4	LGR4_MOUSE	9	0.9973	1
Mouse	MSC80	A2ARI4	no	107515	Lgr4	LGR4_MOUSE	9	0.9756	1
Mouse	R1_defNCS 2°	A2ARV4	no	14725	Lrp2	LRP2_MOUSE	13	1	21
Mouse	159-2 EB	A2ARV4	no	14725	Lrp2	LRP2_MOUSE	13	1	9
Mouse	J1_EB	A2ARV4	no	14725	Lrp2	LRP2_MOUSE	13	1	8
Mouse	R1_EB	A2ARV4	no	14725	Lrp2	LRP2_MOUSE	13	1	7
Mouse	R1_primNCS 1°	A2ARV4	no	14725	Lrp2	LRP2_MOUSE	13	1	7
Mouse	Astroglia	A2ARV4	no	14725	Lrp2	LRP2_MOUSE	13	1	6
Mouse	E14Tg2a	A2ARV4	no	14725	Lrp2	LRP2_MOUSE	13	1	4
Mouse	159-2 ES	A2ARV4	no	14725	Lrp2	LRP2_MOUSE	13	1	3
Mouse	D3_ES	A2ARV4	no	14725	Lrp2	LRP2_MOUSE	13	1	3
Mouse	TTF-1_iPS	A2ARV4	no	14725	Lrp2	LRP2_MOUSE	13	1	3
Mouse	159-2 NP	A2ARV4	no	14725	Lrp2	LRP2_MOUSE	13	1	2
Mouse	R1_ES	A2ARV4	no	14725	Lrp2	LRP2_MOUSE	13	0.9998	2
Mouse	Adipocytes subcutaneous	A2ARV4	no	14725	Lrp2	LRP2_MOUSE	13	0.9658	1
Mouse	2D4-iPS	A2ASS6	no	22138	Ttn	TITIN_MOUSE	2	0.9406	2
Mouse	MSC80	A2ASS6	no	22138	Ttn	TITIN_MOUSE	2	0.9717	2
Mouse	Neural stem cells (SVZ)	A2AVA0	no	64817	Svep1	SVEP1_MOUSE	1	0.9967	1
Mouse	Astroglia	A2AVZ9	no	58207	Slc43a3	S43A3_MOUSE	8	1	3
Mouse	Adipocytes subcutaneous	A2AVZ9	no	58207	Slc43a3	S43A3_MOUSE	8	1	2
Mouse	TH-1	A2AVZ9	no	58207	Slc43a3	S43A3_MOUSE	8	1	2
Mouse	TTF-1_iPS	A2AVZ9	no	58207	Slc43a3	S43A3_MOUSE	8	0.9991	2
Mouse	Macrophages (BM-der.)	A2AVZ9	no	58207	Slc43a3	S43A3_MOUSE	8	0.9885	1
Mouse	R1_ES	A2AVZ9	no	58207	Slc43a3	S43A3_MOUSE	8	0.9927	1
Mouse	Spleenocytes	A2AVZ9	no	58207	Slc43a3	S43A3_MOUSE	8	0.9717	1
Mouse	TH-17	A2AVZ9	no	58207	Slc43a3	S43A3_MOUSE	8	0.9944	1
Human	NK cells	A2BFH1	no	164022	PPIAL4A	PAL4A_HUMAN	3	0.9999	2
Human	IMR-32	A2BFH1	no	164022	PPIAL4A	PAL4A_HUMAN	3	0.9955	1
Human	PASMC	A2BFH1	no	164022	PPIAL4A	PAL4A_HUMAN	3	0.9858	1
Human	IMR-32	A2RU67	no	57613	KIAA1467	K1467_HUMAN	6	1	3
Human	HEK	A2RU67	no	57613	KIAA1467	K1467_HUMAN	6	0.9946	1
Human	L-540	A2RU67	no	57613	KIAA1467	K1467_HUMAN	6	0.9522	1
Human	LN-18	A2RU67	no	57613	KIAA1467	K1467_HUMAN	6	0.9927	1
Human	NB4	A2RU67	no	57613	KIAA1467	K1467_HUMAN	6	0.9894	1
Human	Rh28	A2RU67	no	57613	KIAA1467	K1467_HUMAN	6	0.9914	1
Human	Rh28	A2VDJ0	no	23240	KIAA0922	T131L_HUMAN	2	1	3
Human	RD	A2VDJ0	no	23240	KIAA0922	T131L_HUMAN	2	0.9972	1
Mouse	Adipocytes subcutaneous	A6H584	no	0	Col29a1	CO6A5_MOUSE	3	1	12
Mouse	Astroglia	A6H584	no	0	Col29a1	CO6A5_MOUSE	3	0.8565	1
Mouse	D3_ES	A6H584	no	0	Col29a1	CO6A5_MOUSE	3	0.9798	1
Human	U-2 OS	A6NGN9	no	402665	IGLON5	IGLO5_HUMAN	2	1	3
Human	ZL55 MPM	A6NGN9	no	402665	IGLON5	IGLO5_HUMAN	2	1	2
Human	L-540	A6NGU5	no	2679	GGT3P	GGT3_HUMAN	21	1	7
Human	NB4	A6NGU5	no	2679	GGT3P	GGT3_HUMAN	21	1	6
Human	786-O	A6NGU5	no	2679	GGT3P	GGT3_HUMAN	21	1	5
Human	LN-18	A6NGU5	no	2679	GGT3P	GGT3_HUMAN	21	1	5
Human	HDLM-2	A6NGU5	no	2679	GGT3P	GGT3_HUMAN	21	0.9997	3
Human	L-428	A6NGU5	no	2679	GGT3P	GGT3_HUMAN	21	1	3
Human	Glioblastoma exvivo	A6NGU5	no	2679	GGT3P	GGT3_HUMAN	21	1	2
Human	Jurkat (clone E6-1)	A6NGU5	no	2679	GGT3P	GGT3_HUMAN	21	0.999	2
Human	LN-229	A6NGU5	no	2679	GGT3P	GGT3_HUMAN	21	0.9994	2
Human	MedB-1	A6NGU5	no	2679	GGT3P	GGT3_HUMAN	21	0.9998	2
Human	U-2 OS	A6NGU5	no	2679	GGT3P	GGT3_HUMAN	21	1	2
Human	B-All	A6NGU5	no	2679	GGT3P	GGT3_HUMAN	21	0.9916	1
Human	HBL-1	A6NGU5	no	2679	GGT3P	GGT3_HUMAN	21	0.9873	1
Human	HEK	A6NGU5	no	2679	GGT3P	GGT3_HUMAN	21	0.9893	1
Human	IMR-32	A6NGU5	no	2679	GGT3P	GGT3_HUMAN	21	0.9775	1
Human	Melanoma NSph	A6NGU5	no	2679	GGT3P	GGT3_HUMAN	21	0.9901	1
Human	P493-6	A6NGU5	no	2679	GGT3P	GGT3_HUMAN	21	0.8699	1
Human	Rh28	A6NGU5	no	2679	GGT3P	GGT3_HUMAN	21	0.9936	1
Human	SU4 (SU-DHL-4)	A6NGU5	no	2679	GGT3P	GGT3_HUMAN	21	0.912	1
Human	T98G	A6NGU5	no	2679	GGT3P	GGT3_HUMAN	21	0.996	1
Human	U-251 MG	A6NGU5	no	2679	GGT3P	GGT3_HUMAN	21	0.9903	1
Human	HL-60	A6NI73	CD85f	353514	LILRA5	LIRA5_HUMAN	1	1	2
Human	Adipocytes	A6NKC4	no	100132417	FCGR1C	FCGRC_HUMAN	3	0.9941	1
Human	CD4+, CD25- Tcells	A6NKC4	no	100132417	FCGR1C	FCGRC_HUMAN	3	0.9923	1
Human	Lymphoma	A6NKC4	no	100132417	FCGR1C	FCGRC_HUMAN	3	0.9928	1
Human	U-251 MG	A6NKL6	no	0	TTMA	TTMA_HUMAN	3	1	2
Human	Glioblastoma exvivo	A6NKL6	no	0	TTMA	TTMA_HUMAN	3	0.9939	1
Human	U-87 MG	A6NKL6	no	0	TTMA	TTMA_HUMAN	3	0.9667	1
Human	Adipocytes	A6NMZ7	no	131873	COL6A6	CO6A6_HUMAN	2	1	7
Human	SDM104	A6NMZ7	no	131873	COL6A6	CO6A6_HUMAN	2	0.967	1
Human	LN-18	A7MBM2	no	85455	DISP2	DISP2_HUMAN	3	1	6
Human	LN-229	A7MBM2	no	85455	DISP2	DISP2_HUMAN	3	0.9999	2
Human	A-431	A7MBM2	no	85455	DISP2	DISP2_HUMAN	3	0.9883	1
Mouse	TH-0	A8E0Y8	CD101	630146	Cd101	IGSF2_MOUSE	3	0.998	2
Mouse	TH-17	A8E0Y8	CD101	630146	Cd101	IGSF2_MOUSE	3	1	2
Mouse	Spleenocytes	A8E0Y8	CD101	630146	Cd101	IGSF2_MOUSE	3	0.9939	1
Human	Glioblastoma exvivo	A8MVW0	no	284069	FAM171A2	F1712_HUMAN	5	0.9914	1
Human	LN-18	A8MVW0	no	284069	FAM171A2	F1712_HUMAN	5	0.9557	1
Human	Melanoma NSph	A8MVW0	no	284069	FAM171A2	F1712_HUMAN	5	0.9935	1
Human	U-2 OS	A8MVW0	no	284069	FAM171A2	F1712_HUMAN	5	0.9801	1
Human	ZL55 MPM	A8MVW0	no	284069	FAM171A2	F1712_HUMAN	5	0.9931	1
Human	Rh28	A8MVW5	no	253012	HEPACAM2	HECA2_HUMAN	1	1	2
Human	Rh28	A8MWY0	no	222223	KIAA1324L	K132L_HUMAN	2	1	2
Human	IMR-32	A8MWY0	no	222223	KIAA1324L	K132L_HUMAN	2	0.9955	1
Human	HBL-1	A8MYG8	no	0	0	YN011_HUMAN	1	0.9409	1
Human	U-251 MG	A8TX70	no	256076	COL29A1	CO6A5_HUMAN	2	0.8944	2
Human	HDLM-2	A8TX70	no	256076	COL29A1	CO6A5_HUMAN	2	0.9935	1
Mouse	Astroglia	B0V2N1	no	19280	Ptprs	PTPRS_MOUSE	9	1	3
Mouse	Neural stem cells (spinal cord)	B0V2N1	no	19280	Ptprs	PTPRS_MOUSE	9	1	3
Mouse	159-2 NP	B0V2N1	no	19280	Ptprs	PTPRS_MOUSE	9	1	2
Mouse	D3_ES	B0V2N1	no	19280	Ptprs	PTPRS_MOUSE	9	0.9977	2
Mouse	GL261	B0V2N1	no	19280	Ptprs	PTPRS_MOUSE	9	1	2
Mouse	J1_neurons	B0V2N1	no	19280	Ptprs	PTPRS_MOUSE	9	0.9986	2
Mouse	MSC80	B0V2N1	no	19280	Ptprs	PTPRS_MOUSE	9	1	2
Mouse	Neural stem cells (SVZ)	B0V2N1	no	19280	Ptprs	PTPRS_MOUSE	9	1	2
Mouse	J1_EB	B0V2N1	no	19280	Ptprs	PTPRS_MOUSE	9	0.9971	1
Mouse	TH-0	B2RPV6	no	70945	Mmrn1	MMRN1_MOUSE	2	0.9998	2
Mouse	Spleenocytes	B2RPV6	no	70945	Mmrn1	MMRN1_MOUSE	2	0.9862	1
Human	LN-18	O00116	no	8540	AGPS	ADAS_HUMAN	2	0.9927	1
Human	T98G	O00116	no	8540	AGPS	ADAS_HUMAN	2	0.9963	1
Human	Glioblastoma exvivo	O00206	CD284	7099	TLR4	TLR4_HUMAN	5	1	2
Human	Rh28	O00206	CD284	7099	TLR4	TLR4_HUMAN	5	1	2
Human	HL-60	O00206	CD284	7099	TLR4	TLR4_HUMAN	5	0.9713	1
Human	LN-18	O00206	CD284	7099	TLR4	TLR4_HUMAN	5	0.9927	1
Human	LN-229	O00206	CD284	7099	TLR4	TLR4_HUMAN	5	0.9784	1
Human	HL-60	O00241	CD172b	10326	SIRPB1	SIRB1_HUMAN	10	1	6
Human	NB4	O00241	CD172b	10326	SIRPB1	SIRB1_HUMAN	10	1	6
Human	Melanoma Adh	O00241	CD172b	10326	SIRPB1	SIRB1_HUMAN	10	1	4
Human	Glioblastoma exvivo	O00241	CD172b	10326	SIRPB1	SIRB1_HUMAN	10	0.9998	3
Human	Melanoma NSph	O00241	CD172b	10326	SIRPB1	SIRB1_HUMAN	10	0.9999	3
Human	PASMC	O00241	CD172b	10326	SIRPB1	SIRB1_HUMAN	10	0.9998	3
Human	U-87 MG	O00241	CD172b	10326	SIRPB1	SIRB1_HUMAN	10	1	3
Human	NK cells	O00241	CD172b	10326	SIRPB1	SIRB1_HUMAN	10	1	2
Human	Lymphoma	O00241	CD172b	10326	SIRPB1	SIRB1_HUMAN	10	0.9921	1
Human	MedB-1	O00241	CD172b	10326	SIRPB1	SIRB1_HUMAN	10	0.9524	1
Human	T98G	O00300	no	4982	TNFRSF11B	TR11B_HUMAN	1	0.9963	1
Human	U-251 MG	O00391	no	5768	QSOX1	QSOX1_HUMAN	1	0.9864	1
Human	CD4+, CD25- Tcells	O00398	no	27334	P2RY10	P2Y10_HUMAN	3	1	3
Human	Lymphoma	O00398	no	27334	P2RY10	P2Y10_HUMAN	3	1	2
Human	NK cells	O00398	no	27334	P2RY10	P2Y10_HUMAN	3	0.9883	1
Human	IMR-32	O00451	no	2675	GFRA2	GFRA2_HUMAN	2	1	18
Human	Glioblastoma exvivo	O00451	no	2675	GFRA2	GFRA2_HUMAN	2	0.9939	1
Human	U-251 MG	O00461	no	27333	GOLIM4	GOLI4_HUMAN	13	1	9
Human	HEK	O00461	no	27333	GOLIM4	GOLI4_HUMAN	13	1	4
Human	HeLa	O00461	no	27333	GOLIM4	GOLI4_HUMAN	13	1	4
Human	Melanoma NSph	O00461	no	27333	GOLIM4	GOLI4_HUMAN	13	1	3
Human	Glioblastoma exvivo	O00461	no	27333	GOLIM4	GOLI4_HUMAN	13	0.9959	2
Human	IMR-32	O00461	no	27333	GOLIM4	GOLI4_HUMAN	13	1	2
Human	Ruch-2	O00461	no	27333	GOLIM4	GOLI4_HUMAN	13	1	2
Human	T98G	O00461	no	27333	GOLIM4	GOLI4_HUMAN	13	1	2
Human	U-87 MG	O00461	no	27333	GOLIM4	GOLI4_HUMAN	13	1	2
Human	LN-229	O00461	no	27333	GOLIM4	GOLI4_HUMAN	13	0.9977	1
Human	RD	O00461	no	27333	GOLIM4	GOLI4_HUMAN	13	0.9972	1
Human	Rh28	O00461	no	27333	GOLIM4	GOLI4_HUMAN	13	0.9968	1
Human	U-2 OS	O00461	no	27333	GOLIM4	GOLI4_HUMAN	13	0.9961	1
Human	U-2 OS	O00468	no	375790	AGRN	AGRIN_HUMAN	14	1	4
Human	Melanoma NSph	O00468	no	375790	AGRN	AGRIN_HUMAN	14	1	3
Human	SDM5	O00468	no	375790	AGRN	AGRIN_HUMAN	14	1	3
Human	Melanoma Adh	O00468	no	375790	AGRN	AGRIN_HUMAN	14	1	2
Human	U-251 MG	O00468	no	375790	AGRN	AGRIN_HUMAN	14	1	2
Human	ZL55 MPM	O00468	no	375790	AGRN	AGRIN_HUMAN	14	1	2
Human	Adipocytes	O00468	no	375790	AGRN	AGRIN_HUMAN	14	0.9936	1
Human	CaLu-3	O00468	no	375790	AGRN	AGRIN_HUMAN	14	0.8824	1
Human	HCC4012	O00468	no	375790	AGRN	AGRIN_HUMAN	14	0.874	1
Human	HEK	O00468	no	375790	AGRN	AGRIN_HUMAN	14	0.9818	1
Human	RD	O00468	no	375790	AGRN	AGRIN_HUMAN	14	0.9972	1
Human	Rh28	O00468	no	375790	AGRN	AGRIN_HUMAN	14	0.9968	1
Human	Ruch-2	O00468	no	375790	AGRN	AGRIN_HUMAN	14	0.9969	1
Human	SDM104	O00468	no	375790	AGRN	AGRIN_HUMAN	14	0.9942	1
Human	U-2 OS	O00469	no	5352	PLOD2	PLOD2_HUMAN	17	1	9
Human	U-251 MG	O00469	no	5352	PLOD2	PLOD2_HUMAN	17	1	6
Human	SDM34	O00469	no	5352	PLOD2	PLOD2_HUMAN	17	1	5
Human	T98G	O00469	no	5352	PLOD2	PLOD2_HUMAN	17	1	4
Human	HCC4012	O00469	no	5352	PLOD2	PLOD2_HUMAN	17	1	3
Human	HEK	O00469	no	5352	PLOD2	PLOD2_HUMAN	17	1	3
Human	HeLa	O00469	no	5352	PLOD2	PLOD2_HUMAN	17	1	3
Human	PASMC	O00469	no	5352	PLOD2	PLOD2_HUMAN	17	1	3
Human	Ruch-2	O00469	no	5352	PLOD2	PLOD2_HUMAN	17	1	3
Human	SDM104	O00469	no	5352	PLOD2	PLOD2_HUMAN	17	1	3
Human	ZL55 MPM	O00469	no	5352	PLOD2	PLOD2_HUMAN	17	1	3
Human	Melanoma NSph	O00469	no	5352	PLOD2	PLOD2_HUMAN	17	1	2
Human	RD	O00469	no	5352	PLOD2	PLOD2_HUMAN	17	1	2
Human	Rh28	O00469	no	5352	PLOD2	PLOD2_HUMAN	17	1	2
Human	Adipocytes	O00469	no	5352	PLOD2	PLOD2_HUMAN	17	0.9941	1
Human	Glioblastoma exvivo	O00469	no	5352	PLOD2	PLOD2_HUMAN	17	0.9939	1
Human	IMR-32	O00469	no	5352	PLOD2	PLOD2_HUMAN	17	0.9312	1
Human	B-All	O00478	no	10384	BTN3A3	BT3A3_HUMAN	33	1	3
Human	CD4+, CD25- Tcells	O00478	no	10384	BTN3A3	BT3A3_HUMAN	33	1	3
Human	NK cells	O00478	no	10384	BTN3A3	BT3A3_HUMAN	33	1	3
Human	CaLu-3	O00478	no	10384	BTN3A3	BT3A3_HUMAN	33	1	2
Human	HBL-1	O00478	no	10384	BTN3A3	BT3A3_HUMAN	33	1	2
Human	HDLM-2	O00478	no	10384	BTN3A3	BT3A3_HUMAN	33	1	2
Human	hMSC	O00478	no	10384	BTN3A3	BT3A3_HUMAN	33	1	2
Human	KM-H2	O00478	no	10384	BTN3A3	BT3A3_HUMAN	33	1	2
Human	L-428	O00478	no	10384	BTN3A3	BT3A3_HUMAN	33	1	2
Human	L-540	O00478	no	10384	BTN3A3	BT3A3_HUMAN	33	1	2
Human	LN-18	O00478	no	10384	BTN3A3	BT3A3_HUMAN	33	1	2
Human	MedB-1	O00478	no	10384	BTN3A3	BT3A3_HUMAN	33	1	2
Human	NB4	O00478	no	10384	BTN3A3	BT3A3_HUMAN	33	1	2
Human	SDM5	O00478	no	10384	BTN3A3	BT3A3_HUMAN	33	1	2
Human	SU-DHL-6	O00478	no	10384	BTN3A3	BT3A3_HUMAN	33	1	2
Human	SU4 (SU-DHL-4)	O00478	no	10384	BTN3A3	BT3A3_HUMAN	33	1	2
Human	T98G	O00478	no	10384	BTN3A3	BT3A3_HUMAN	33	1	2
Human	U-251 MG	O00478	no	10384	BTN3A3	BT3A3_HUMAN	33	1	2
Human	U2932	O00478	no	10384	BTN3A3	BT3A3_HUMAN	33	1	2
Human	A-431	O00478	no	10384	BTN3A3	BT3A3_HUMAN	33	0.9935	1
Human	Adipocytes	O00478	no	10384	BTN3A3	BT3A3_HUMAN	33	0.9941	1
Human	Glioblastoma exvivo	O00478	no	10384	BTN3A3	BT3A3_HUMAN	33	0.9939	1
Human	HCC4012	O00478	no	10384	BTN3A3	BT3A3_HUMAN	33	0.9967	1
Human	HEK	O00478	no	10384	BTN3A3	BT3A3_HUMAN	33	0.9946	1
Human	Jurkat (clone E6-1)	O00478	no	10384	BTN3A3	BT3A3_HUMAN	33	0.9913	1
Human	LN-229	O00478	no	10384	BTN3A3	BT3A3_HUMAN	33	0.9367	1
Human	Lymphoma	O00478	no	10384	BTN3A3	BT3A3_HUMAN	33	0.9928	1
Human	Melanoma Adh	O00478	no	10384	BTN3A3	BT3A3_HUMAN	33	0.9915	1
Human	Melanoma NSph	O00478	no	10384	BTN3A3	BT3A3_HUMAN	33	0.995	1
Human	SDM104	O00478	no	10384	BTN3A3	BT3A3_HUMAN	33	0.9942	1
Human	SDM34	O00478	no	10384	BTN3A3	BT3A3_HUMAN	33	0.907	1
Human	U-2 OS	O00478	no	10384	BTN3A3	BT3A3_HUMAN	33	0.9961	1
Human	ZL55 MPM	O00478	no	10384	BTN3A3	BT3A3_HUMAN	33	0.9975	1
Human	Melanoma Adh	O00533	no	10752	CHL1	CHL1_HUMAN	4	1	15
Human	Glioblastoma exvivo	O00533	no	10752	CHL1	CHL1_HUMAN	4	1	10
Human	Melanoma NSph	O00533	no	10752	CHL1	CHL1_HUMAN	4	1	10
Human	SU4 (SU-DHL-4)	O00533	no	10752	CHL1	CHL1_HUMAN	4	1	5
Human	IMR-32	O00567	no	10528	NOP56	NOP56_HUMAN	5	0.9951	1
Human	L-540	O00567	no	10528	NOP56	NOP56_HUMAN	5	0.9921	1
Human	Melanoma NSph	O00567	no	10528	NOP56	NOP56_HUMAN	5	0.995	1
Human	Ruch-2	O00567	no	10528	NOP56	NOP56_HUMAN	5	0.9795	1
Human	U-251 MG	O00567	no	10528	NOP56	NOP56_HUMAN	5	0.9954	1
Human	SU4 (SU-DHL-4)	O00587	no	4242	MFNG	MFNG_HUMAN	1	1	4
Human	U-2 OS	O00592	no	5420	PODXL	PODXL_HUMAN	13	1	4
Human	HEK	O00592	no	5420	PODXL	PODXL_HUMAN	13	1	3
Human	HeLa	O00592	no	5420	PODXL	PODXL_HUMAN	13	1	3
Human	U2932	O00592	no	5420	PODXL	PODXL_HUMAN	13	1	3
Human	HCC4012	O00592	no	5420	PODXL	PODXL_HUMAN	13	1	2
Human	SDM5	O00592	no	5420	PODXL	PODXL_HUMAN	13	0.9999	2
Human	U-251 MG	O00592	no	5420	PODXL	PODXL_HUMAN	13	0.9997	2
Human	Adipocytes	O00592	no	5420	PODXL	PODXL_HUMAN	13	0.9941	1
Human	IMR-32	O00592	no	5420	PODXL	PODXL_HUMAN	13	0.9955	1
Human	P493-6	O00592	no	5420	PODXL	PODXL_HUMAN	13	0.9943	1
Human	Rh28	O00592	no	5420	PODXL	PODXL_HUMAN	13	0.9968	1
Human	Ruch-2	O00592	no	5420	PODXL	PODXL_HUMAN	13	0.9969	1
Human	U-87 MG	O00592	no	5420	PODXL	PODXL_HUMAN	13	0.9943	1
Human	U-251 MG	O00634	no	4917	NTN3	NET3_HUMAN	1	0.9954	1
Human	HL-60	O00754	no	4125	MAN2B1	MA2B1_HUMAN	12	1	4
Human	Melanoma NSph	O00754	no	4125	MAN2B1	MA2B1_HUMAN	12	1	4
Human	Ruch-2	O00754	no	4125	MAN2B1	MA2B1_HUMAN	12	1	3
Human	KM-H2	O00754	no	4125	MAN2B1	MA2B1_HUMAN	12	1	2
Human	Melanoma Adh	O00754	no	4125	MAN2B1	MA2B1_HUMAN	12	1	2
Human	RD	O00754	no	4125	MAN2B1	MA2B1_HUMAN	12	1	2
Human	Rh28	O00754	no	4125	MAN2B1	MA2B1_HUMAN	12	0.9981	2
Human	HBL-1	O00754	no	4125	MAN2B1	MA2B1_HUMAN	12	0.9936	1
Human	HEK	O00754	no	4125	MAN2B1	MA2B1_HUMAN	12	0.9946	1
Human	L-428	O00754	no	4125	MAN2B1	MA2B1_HUMAN	12	0.995	1
Human	U-2 OS	O00754	no	4125	MAN2B1	MA2B1_HUMAN	12	0.8822	1
Human	U-251 MG	O00754	no	4125	MAN2B1	MA2B1_HUMAN	12	0.9954	1
Mouse	2D4-iPS	O08530	no	13609	S1pr1	S1PR1_MOUSE	14	0.9966	1
Mouse	Adipocytes subcutaneous	O08530	no	13609	S1pr1	S1PR1_MOUSE	14	0.9959	1
Mouse	Astroglia	O08530	no	13609	S1pr1	S1PR1_MOUSE	14	0.9941	1
Mouse	C2C12	O08530	no	13609	S1pr1	S1PR1_MOUSE	14	0.9419	1
Mouse	D3_ES	O08530	no	13609	S1pr1	S1PR1_MOUSE	14	0.9966	1
Mouse	J1_EB	O08530	no	13609	S1pr1	S1PR1_MOUSE	14	0.9971	1
Mouse	J774.2	O08530	no	13609	S1pr1	S1PR1_MOUSE	14	0.9935	1
Mouse	Neural stem cells (forebrain)	O08530	no	13609	S1pr1	S1PR1_MOUSE	14	0.9947	1
Mouse	Neural stem cells (spinal cord)	O08530	no	13609	S1pr1	S1PR1_MOUSE	14	0.9811	1
Mouse	R1_ES	O08530	no	13609	S1pr1	S1PR1_MOUSE	14	0.9869	1
Mouse	SMA560	O08530	no	13609	S1pr1	S1PR1_MOUSE	14	0.9962	1
Mouse	TH-0	O08530	no	13609	S1pr1	S1PR1_MOUSE	14	0.9881	1
Mouse	TH-1	O08530	no	13609	S1pr1	S1PR1_MOUSE	14	0.9953	1
Mouse	TH-17	O08530	no	13609	S1pr1	S1PR1_MOUSE	14	0.9944	1
Mouse	Min6	O08532	no	12293	Cacna2d1	CA2D1_MOUSE	24	1	20
Mouse	MSC80	O08532	no	12293	Cacna2d1	CA2D1_MOUSE	24	1	18
Mouse	Astroglia	O08532	no	12293	Cacna2d1	CA2D1_MOUSE	24	1	8
Mouse	J1_neurons	O08532	no	12293	Cacna2d1	CA2D1_MOUSE	24	1	7
Mouse	Neural stem cells (forebrain)	O08532	no	12293	Cacna2d1	CA2D1_MOUSE	24	1	7
Mouse	159-2 EB	O08532	no	12293	Cacna2d1	CA2D1_MOUSE	24	1	6
Mouse	C2C12	O08532	no	12293	Cacna2d1	CA2D1_MOUSE	24	1	5
Mouse	Neural stem cells (spinal cord)	O08532	no	12293	Cacna2d1	CA2D1_MOUSE	24	1	5
Mouse	159-2 ES	O08532	no	12293	Cacna2d1	CA2D1_MOUSE	24	1	4
Mouse	159-2 NP	O08532	no	12293	Cacna2d1	CA2D1_MOUSE	24	1	4
Mouse	Adipocytes subcutaneous	O08532	no	12293	Cacna2d1	CA2D1_MOUSE	24	1	4
Mouse	J1_EB	O08532	no	12293	Cacna2d1	CA2D1_MOUSE	24	1	4
Mouse	Neural stem cells (SVZ)	O08532	no	12293	Cacna2d1	CA2D1_MOUSE	24	1	4
Mouse	R1_EB	O08532	no	12293	Cacna2d1	CA2D1_MOUSE	24	1	4
Mouse	R1_ES	O08532	no	12293	Cacna2d1	CA2D1_MOUSE	24	1	4
Mouse	SMA560	O08532	no	12293	Cacna2d1	CA2D1_MOUSE	24	1	4
Mouse	D3_ES	O08532	no	12293	Cacna2d1	CA2D1_MOUSE	24	1	3
Mouse	E14Tg2a	O08532	no	12293	Cacna2d1	CA2D1_MOUSE	24	1	3
Mouse	J1_NP	O08532	no	12293	Cacna2d1	CA2D1_MOUSE	24	1	3
Mouse	R1_defNCS 2°	O08532	no	12293	Cacna2d1	CA2D1_MOUSE	24	1	3
Mouse	R1_primNCS 1°	O08532	no	12293	Cacna2d1	CA2D1_MOUSE	24	1	3
Mouse	2D4-iPS	O08532	no	12293	Cacna2d1	CA2D1_MOUSE	24	0.9966	1
Mouse	TH-0	O08532	no	12293	Cacna2d1	CA2D1_MOUSE	24	0.9946	1
Mouse	TTF-1_iPS	O08532	no	12293	Cacna2d1	CA2D1_MOUSE	24	0.9955	1
Mouse	J1_EB	O08538	no	11600	Angpt1	ANGP1_MOUSE	2	0.9216	1
Mouse	Neural stem cells (spinal cord)	O08538	no	11600	Angpt1	ANGP1_MOUSE	2	0.9972	1
Mouse	159-2 ES	O08545	no	13638	Efna3	EFNA3_MOUSE	3	0.9947	1
Mouse	Neural stem cells (spinal cord)	O08545	no	13638	Efna3	EFNA3_MOUSE	3	0.9972	1
Mouse	R1_ES	O08545	no	13638	Efna3	EFNA3_MOUSE	3	0.9927	1
Mouse	MSC80	O08602	no	19368	Raet1a	RAE1A_MOUSE	18	1	9
Mouse	Min6	O08602	no	19368	Raet1a	RAE1A_MOUSE	18	1	5
Mouse	GL261	O08602	no	19368	Raet1a	RAE1A_MOUSE	18	1	4
Mouse	J1_EB	O08602	no	19368	Raet1a	RAE1A_MOUSE	18	1	4
Mouse	R1_ES	O08602	no	19368	Raet1a	RAE1A_MOUSE	18	1	4
Mouse	E14Tg2a	O08602	no	19368	Raet1a	RAE1A_MOUSE	18	1	3
Mouse	J774.2	O08602	no	19368	Raet1a	RAE1A_MOUSE	18	1	3
Mouse	Neural stem cells (spinal cord)	O08602	no	19368	Raet1a	RAE1A_MOUSE	18	1	3
Mouse	D3_ES	O08602	no	19368	Raet1a	RAE1A_MOUSE	18	1	2
Mouse	R1_EB	O08602	no	19368	Raet1a	RAE1A_MOUSE	18	1	2
Mouse	159-2 ES	O08602	no	19368	Raet1a	RAE1A_MOUSE	18	0.986	1
Mouse	159-2 NP	O08602	no	19368	Raet1a	RAE1A_MOUSE	18	0.9284	1
Mouse	2D4-iPS	O08602	no	19368	Raet1a	RAE1A_MOUSE	18	0.9875	1
Mouse	Astroglia	O08602	no	19368	Raet1a	RAE1A_MOUSE	18	0.9941	1
Mouse	Neural stem cells (forebrain)	O08602	no	19368	Raet1a	RAE1A_MOUSE	18	0.9947	1
Mouse	Neural stem cells (SVZ)	O08602	no	19368	Raet1a	RAE1A_MOUSE	18	0.9967	1
Mouse	R1_primNCS 1°	O08602	no	19368	Raet1a	RAE1A_MOUSE	18	0.9979	1
Mouse	TTF-1_iPS	O08602	no	19368	Raet1a	RAE1A_MOUSE	18	0.9955	1
Mouse	J774.2	O08603	no	19369	Raet1b	RAE1B_MOUSE	10	1	12
Mouse	159-2 NP	O08603	no	19369	Raet1b	RAE1B_MOUSE	10	1	6
Mouse	J1_EB	O08603	no	19369	Raet1b	RAE1B_MOUSE	10	1	3
Mouse	E14Tg2a	O08603	no	19369	Raet1b	RAE1B_MOUSE	10	1	2
Mouse	R1_EB	O08603	no	19369	Raet1b	RAE1B_MOUSE	10	1	2
Mouse	R1_NP_4h	O08603	no	19369	Raet1b	RAE1B_MOUSE	10	1	2
Mouse	159-2 EB	O08603	no	19369	Raet1b	RAE1B_MOUSE	10	0.9161	1
Mouse	D3_ES	O08603	no	19369	Raet1b	RAE1B_MOUSE	10	0.9966	1
Mouse	Neural stem cells (forebrain)	O08603	no	19369	Raet1b	RAE1B_MOUSE	10	0.9921	1
Mouse	R1_defNCS 2°	O08603	no	19369	Raet1b	RAE1B_MOUSE	10	0.996	1
Mouse	J1_EB	O08604	no	19370	Raet1c	RAE1C_MOUSE	1	0.9971	1
Mouse	Neural stem cells (SVZ)	O08665	no	20346	Sema3a	SEM3A_MOUSE	3	1	2
Mouse	J1_neurons	O08665	no	20346	Sema3a	SEM3A_MOUSE	3	0.9973	1
Mouse	Neural stem cells (spinal cord)	O08665	no	20346	Sema3a	SEM3A_MOUSE	3	0.9972	1
Mouse	TH-0	O08742	CD42d	14729	Gp5	GPV_MOUSE	1	0.9763	1
Mouse	Astroglia	O08747	no	22253	Unc5c	UNC5C_MOUSE	7	0.9929	1
Mouse	E14Tg2a	O08747	no	22253	Unc5c	UNC5C_MOUSE	7	0.9915	1
Mouse	GL261	O08747	no	22253	Unc5c	UNC5C_MOUSE	7	0.9927	1
Mouse	J1_neurons	O08747	no	22253	Unc5c	UNC5C_MOUSE	7	0.9973	1
Mouse	Neural stem cells (spinal cord)	O08747	no	22253	Unc5c	UNC5C_MOUSE	7	0.9345	1
Mouse	R1_defNCS 2°	O08747	no	22253	Unc5c	UNC5C_MOUSE	7	0.996	1
Mouse	R1_primNCS 1°	O08747	no	22253	Unc5c	UNC5C_MOUSE	7	0.9979	1
Mouse	Min6	O08795	no	19089	Prkcsh	GLU2B_MOUSE	2	0.9458	1
Mouse	MSC80	O08795	no	19089	Prkcsh	GLU2B_MOUSE	2	0.9933	1
Mouse	J1_neurons	O08842	no	14586	Gfra2	GFRA2_MOUSE	8	1	5
Mouse	MSC80	O08842	no	14586	Gfra2	GFRA2_MOUSE	8	1	4
Mouse	Neural stem cells (forebrain)	O08842	no	14586	Gfra2	GFRA2_MOUSE	8	1	3
Mouse	Neural stem cells (spinal cord)	O08842	no	14586	Gfra2	GFRA2_MOUSE	8	1	2
Mouse	GL261	O08842	no	14586	Gfra2	GFRA2_MOUSE	8	0.9957	1
Mouse	SMA560	O08842	no	14586	Gfra2	GFRA2_MOUSE	8	0.9962	1
Mouse	Spleenocytes	O08842	no	14586	Gfra2	GFRA2_MOUSE	8	0.9945	1
Mouse	TH-0	O08842	no	14586	Gfra2	GFRA2_MOUSE	8	0.9946	1
Mouse	Neural stem cells (SVZ)	O08852	no	18763	Pkd1	PKD1_MOUSE	1	0.8349	1
Mouse	R1_primNCS 1°	O08912	no	14423	Galnt1	GALT1_MOUSE	2	0.9979	1
Mouse	TTF-1_iPS	O08912	no	14423	Galnt1	GALT1_MOUSE	2	0.9928	1
Mouse	R1_primNCS 1°	O09009	no	19719	Rfng	RFNG_MOUSE	3	1	2
Mouse	D3_ES	O09009	no	19719	Rfng	RFNG_MOUSE	3	0.9877	1
Mouse	TTF-1_iPS	O09009	no	19719	Rfng	RFNG_MOUSE	3	0.9847	1
Mouse	J1_EB	O09010	no	16848	Lfng	LFNG_MOUSE	3	1	3
Mouse	Neural stem cells (spinal cord)	O09010	no	16848	Lfng	LFNG_MOUSE	3	1	3
Mouse	Neural stem cells (SVZ)	O09010	no	16848	Lfng	LFNG_MOUSE	3	1	3
Mouse	Macrophages (BM-der.)	O09047	no	12267	C3ar1	C3AR_MOUSE	3	1	17
Mouse	Astroglia	O09047	no	12267	C3ar1	C3AR_MOUSE	3	1	13
Mouse	J774.2	O09047	no	12267	C3ar1	C3AR_MOUSE	3	1	13
Mouse	Astroglia	O09117	no	0	Sypl1	SYPL1_MOUSE	30	1	19
Mouse	GL261	O09117	no	0	Sypl1	SYPL1_MOUSE	30	1	8
Mouse	MSC80	O09117	no	0	Sypl1	SYPL1_MOUSE	30	1	8
Mouse	159-2 ES	O09117	no	0	Sypl1	SYPL1_MOUSE	30	1	6
Mouse	Neural stem cells (SVZ)	O09117	no	0	Sypl1	SYPL1_MOUSE	30	1	6
Mouse	TH-0	O09117	no	0	Sypl1	SYPL1_MOUSE	30	1	6
Mouse	159-2 NP	O09117	no	0	Sypl1	SYPL1_MOUSE	30	1	5
Mouse	Adipocytes subcutaneous	O09117	no	0	Sypl1	SYPL1_MOUSE	30	1	5
Mouse	Macrophages (BM-der.)	O09117	no	0	Sypl1	SYPL1_MOUSE	30	1	5
Mouse	Neural stem cells (forebrain)	O09117	no	0	Sypl1	SYPL1_MOUSE	30	1	5
Mouse	Neural stem cells (spinal cord)	O09117	no	0	Sypl1	SYPL1_MOUSE	30	1	5
Mouse	J774.2	O09117	no	0	Sypl1	SYPL1_MOUSE	30	1	4
Mouse	Min6	O09117	no	0	Sypl1	SYPL1_MOUSE	30	1	4
Mouse	R1_EB	O09117	no	0	Sypl1	SYPL1_MOUSE	30	1	4
Mouse	Spleenocytes	O09117	no	0	Sypl1	SYPL1_MOUSE	30	1	4
Mouse	TH-17	O09117	no	0	Sypl1	SYPL1_MOUSE	30	1	4
Mouse	159-2 EB	O09117	no	0	Sypl1	SYPL1_MOUSE	30	1	3
Mouse	SMA560	O09117	no	0	Sypl1	SYPL1_MOUSE	30	1	3
Mouse	TH-1	O09117	no	0	Sypl1	SYPL1_MOUSE	30	1	3
Mouse	C2C12	O09117	no	0	Sypl1	SYPL1_MOUSE	30	1	2
Mouse	E14Tg2a	O09117	no	0	Sypl1	SYPL1_MOUSE	30	1	2
Mouse	R1_defNCS 2°	O09117	no	0	Sypl1	SYPL1_MOUSE	30	1	2
Mouse	R1_ES	O09117	no	0	Sypl1	SYPL1_MOUSE	30	1	2
Mouse	2D4-iPS	O09117	no	0	Sypl1	SYPL1_MOUSE	30	0.9966	1
Mouse	D3_ES	O09117	no	0	Sypl1	SYPL1_MOUSE	30	0.9966	1
Mouse	J1_EB	O09117	no	0	Sypl1	SYPL1_MOUSE	30	0.9971	1
Mouse	J1_neurons	O09117	no	0	Sypl1	SYPL1_MOUSE	30	0.9973	1
Mouse	J1_NP	O09117	no	0	Sypl1	SYPL1_MOUSE	30	0.9975	1
Mouse	R1_primNCS 1°	O09117	no	0	Sypl1	SYPL1_MOUSE	30	0.9979	1
Mouse	TTF-1_iPS	O09117	no	0	Sypl1	SYPL1_MOUSE	30	0.9955	1
Mouse	J1_EB	O09118	no	18208	Ntn1	NET1_MOUSE	2	0.9971	1
Mouse	Neural stem cells (forebrain)	O09118	no	18208	Ntn1	NET1_MOUSE	2	0.9947	1
Mouse	TH-1	O09126	CD100	20354	Sema4d	SEM4D_MOUSE	22	1	9
Mouse	TH-17	O09126	CD100	20354	Sema4d	SEM4D_MOUSE	22	1	8
Mouse	TH-0	O09126	CD100	20354	Sema4d	SEM4D_MOUSE	22	1	6
Mouse	159-2 EB	O09126	CD100	20354	Sema4d	SEM4D_MOUSE	22	1	4
Mouse	159-2 ES	O09126	CD100	20354	Sema4d	SEM4D_MOUSE	22	1	4
Mouse	159-2 NP	O09126	CD100	20354	Sema4d	SEM4D_MOUSE	22	1	4
Mouse	E14Tg2a	O09126	CD100	20354	Sema4d	SEM4D_MOUSE	22	1	4
Mouse	R1_EB	O09126	CD100	20354	Sema4d	SEM4D_MOUSE	22	1	4
Mouse	Spleenocytes	O09126	CD100	20354	Sema4d	SEM4D_MOUSE	22	1	4
Mouse	Astroglia	O09126	CD100	20354	Sema4d	SEM4D_MOUSE	22	1	3
Mouse	D3_ES	O09126	CD100	20354	Sema4d	SEM4D_MOUSE	22	1	3
Mouse	GL261	O09126	CD100	20354	Sema4d	SEM4D_MOUSE	22	1	3
Mouse	J1_EB	O09126	CD100	20354	Sema4d	SEM4D_MOUSE	22	1	3
Mouse	J774.2	O09126	CD100	20354	Sema4d	SEM4D_MOUSE	22	1	3
Mouse	R1_ES	O09126	CD100	20354	Sema4d	SEM4D_MOUSE	22	1	3
Mouse	R1_primNCS 1°	O09126	CD100	20354	Sema4d	SEM4D_MOUSE	22	1	3
Mouse	2D4-iPS	O09126	CD100	20354	Sema4d	SEM4D_MOUSE	22	0.9989	2
Mouse	J1_neurons	O09126	CD100	20354	Sema4d	SEM4D_MOUSE	22	1	2
Mouse	Macrophages (BM-der.)	O09126	CD100	20354	Sema4d	SEM4D_MOUSE	22	1	2
Mouse	SMA560	O09126	CD100	20354	Sema4d	SEM4D_MOUSE	22	0.9981	2
Mouse	R1_defNCS 2°	O09126	CD100	20354	Sema4d	SEM4D_MOUSE	22	0.9951	1
Mouse	TTF-1_iPS	O09126	CD100	20354	Sema4d	SEM4D_MOUSE	22	0.9955	1
Mouse	Neural stem cells (spinal cord)	O09159	no	17159	Man2b1	MA2B1_MOUSE	7	1	2
Mouse	Neural stem cells (SVZ)	O09159	no	17159	Man2b1	MA2B1_MOUSE	7	1	2
Mouse	TTF-1_iPS	O09159	no	17159	Man2b1	MA2B1_MOUSE	7	1	2
Mouse	J1_neurons	O09159	no	17159	Man2b1	MA2B1_MOUSE	7	0.9973	1
Mouse	Min6	O09159	no	17159	Man2b1	MA2B1_MOUSE	7	0.9941	1
Mouse	R1_defNCS 2°	O09159	no	17159	Man2b1	MA2B1_MOUSE	7	0.996	1
Mouse	R1_primNCS 1°	O09159	no	17159	Man2b1	MA2B1_MOUSE	7	0.9979	1
Mouse	R1_EB	O09167	no	19933	Rpl21	RL21_MOUSE	5	1	2
Mouse	159-2 ES	O09167	no	19933	Rpl21	RL21_MOUSE	5	0.9869	1
Mouse	E14Tg2a	O09167	no	19933	Rpl21	RL21_MOUSE	5	0.9244	1
Mouse	J1_EB	O09167	no	19933	Rpl21	RL21_MOUSE	5	0.9896	1
Mouse	TH-1	O09167	no	19933	Rpl21	RL21_MOUSE	5	0.9953	1
Human	Adipocytes	O14494	no	8611	PPAP2A	LPP1_HUMAN	10	0.9999	2
Human	Ruch-2	O14494	no	8611	PPAP2A	LPP1_HUMAN	10	1	2
Human	A-431	O14494	no	8611	PPAP2A	LPP1_HUMAN	10	0.9935	1
Human	HEK	O14494	no	8611	PPAP2A	LPP1_HUMAN	10	0.9946	1
Human	HeLa	O14494	no	8611	PPAP2A	LPP1_HUMAN	10	0.9919	1
Human	Jurkat (clone E6-1)	O14494	no	8611	PPAP2A	LPP1_HUMAN	10	0.9913	1
Human	Melanoma Adh	O14494	no	8611	PPAP2A	LPP1_HUMAN	10	0.9915	1
Human	RD	O14494	no	8611	PPAP2A	LPP1_HUMAN	10	0.9972	1
Human	Rh28	O14494	no	8611	PPAP2A	LPP1_HUMAN	10	0.9968	1
Human	U-251 MG	O14494	no	8611	PPAP2A	LPP1_HUMAN	10	0.9954	1
Human	Ruch-2	O14495	no	8613	PPAP2B	LPP3_HUMAN	1	0.9969	1
Human	PASMC	O14498	no	3671	ISLR	ISLR_HUMAN	2	1	4
Human	Rh28	O14498	no	3671	ISLR	ISLR_HUMAN	2	0.9968	1
Human	IMR-32	O14524	no	23306	TMEM194A	T194A_HUMAN	7	1	2
Human	Melanoma Adh	O14524	no	23306	TMEM194A	T194A_HUMAN	7	0.9915	1
Human	Melanoma NSph	O14524	no	23306	TMEM194A	T194A_HUMAN	7	0.995	1
Human	RD	O14524	no	23306	TMEM194A	T194A_HUMAN	7	0.9972	1
Human	Rh28	O14524	no	23306	TMEM194A	T194A_HUMAN	7	0.9968	1
Human	Ruch-2	O14524	no	23306	TMEM194A	T194A_HUMAN	7	0.9969	1
Human	U-251 MG	O14524	no	23306	TMEM194A	T194A_HUMAN	7	0.9842	1
Human	Adipocytes	O14556	no	26330	GAPDHS	G3PT_HUMAN	4	0.9901	1
Human	HEK	O14556	no	26330	GAPDHS	G3PT_HUMAN	4	0.9909	1
Human	LNT-229	O14556	no	26330	GAPDHS	G3PT_HUMAN	4	0.9905	1
Human	Melanoma Adh	O14556	no	26330	GAPDHS	G3PT_HUMAN	4	0.9621	1
Human	L-428	O14638	CD203c	5169	ENPP3	ENPP3_HUMAN	3	1	21
Human	KM-H2	O14638	CD203c	5169	ENPP3	ENPP3_HUMAN	3	1	20
Human	Adipocytes	O14638	CD203c	5169	ENPP3	ENPP3_HUMAN	3	0.9724	1
Human	HEK	O14657	no	27348	TOR1B	TOR1B_HUMAN	6	0.8896	1
Human	RD	O14657	no	27348	TOR1B	TOR1B_HUMAN	6	0.9969	1
Human	Rh28	O14657	no	27348	TOR1B	TOR1B_HUMAN	6	0.9965	1
Human	Ruch-2	O14657	no	27348	TOR1B	TOR1B_HUMAN	6	0.9965	1
Human	U-2 OS	O14657	no	27348	TOR1B	TOR1B_HUMAN	6	0.9957	1
Human	U-251 MG	O14657	no	27348	TOR1B	TOR1B_HUMAN	6	0.995	1
Human	A-431	O14672	CD156c	102	ADAM10	ADA10_HUMAN	42	1	11
Human	B-All	O14672	CD156c	102	ADAM10	ADA10_HUMAN	42	1	11
Human	Jurkat (clone E6-1)	O14672	CD156c	102	ADAM10	ADA10_HUMAN	42	1	11
Human	NK cells	O14672	CD156c	102	ADAM10	ADA10_HUMAN	42	1	10
Human	CaLu-3	O14672	CD156c	102	ADAM10	ADA10_HUMAN	42	1	9
Human	IMR-32	O14672	CD156c	102	ADAM10	ADA10_HUMAN	42	1	8
Human	Rh28	O14672	CD156c	102	ADAM10	ADA10_HUMAN	42	1	8
Human	U-251 MG	O14672	CD156c	102	ADAM10	ADA10_HUMAN	42	1	8
Human	HeLa	O14672	CD156c	102	ADAM10	ADA10_HUMAN	42	1	7
Human	KM-H2	O14672	CD156c	102	ADAM10	ADA10_HUMAN	42	1	7
Human	CD4+, CD25- Tcells	O14672	CD156c	102	ADAM10	ADA10_HUMAN	42	1	6
Human	L-428	O14672	CD156c	102	ADAM10	ADA10_HUMAN	42	1	6
Human	L-540	O14672	CD156c	102	ADAM10	ADA10_HUMAN	42	1	6
Human	MedB-1	O14672	CD156c	102	ADAM10	ADA10_HUMAN	42	1	6
Human	SU4 (SU-DHL-4)	O14672	CD156c	102	ADAM10	ADA10_HUMAN	42	1	6
Human	U-2 OS	O14672	CD156c	102	ADAM10	ADA10_HUMAN	42	1	6
Human	Adipocytes	O14672	CD156c	102	ADAM10	ADA10_HUMAN	42	1	5
Human	HDLM-2	O14672	CD156c	102	ADAM10	ADA10_HUMAN	42	1	5
Human	HEK	O14672	CD156c	102	ADAM10	ADA10_HUMAN	42	1	5
Human	Melanoma Adh	O14672	CD156c	102	ADAM10	ADA10_HUMAN	42	1	5
Human	Melanoma NSph	O14672	CD156c	102	ADAM10	ADA10_HUMAN	42	1	5
Human	SDM4	O14672	CD156c	102	ADAM10	ADA10_HUMAN	42	1	5
Human	U-87 MG	O14672	CD156c	102	ADAM10	ADA10_HUMAN	42	1	5
Human	Glioblastoma exvivo	O14672	CD156c	102	ADAM10	ADA10_HUMAN	42	1	4
Human	HL-60	O14672	CD156c	102	ADAM10	ADA10_HUMAN	42	1	4
Human	LN-18	O14672	CD156c	102	ADAM10	ADA10_HUMAN	42	1	4
Human	Lymphoma	O14672	CD156c	102	ADAM10	ADA10_HUMAN	42	1	4
Human	NB4	O14672	CD156c	102	ADAM10	ADA10_HUMAN	42	1	4
Human	Ruch-2	O14672	CD156c	102	ADAM10	ADA10_HUMAN	42	1	4
Human	ZL55 MPM	O14672	CD156c	102	ADAM10	ADA10_HUMAN	42	1	4
Human	HBL-1	O14672	CD156c	102	ADAM10	ADA10_HUMAN	42	1	3
Human	HCC4012	O14672	CD156c	102	ADAM10	ADA10_HUMAN	42	1	3
Human	SDM104	O14672	CD156c	102	ADAM10	ADA10_HUMAN	42	1	3
Human	SU-DHL-6	O14672	CD156c	102	ADAM10	ADA10_HUMAN	42	1	3
Human	786-O	O14672	CD156c	102	ADAM10	ADA10_HUMAN	42	1	2
Human	RD	O14672	CD156c	102	ADAM10	ADA10_HUMAN	42	1	2
Human	SDM5	O14672	CD156c	102	ADAM10	ADA10_HUMAN	42	1	2
Human	U2932	O14672	CD156c	102	ADAM10	ADA10_HUMAN	42	1	2
Human	LN-229	O14672	CD156c	102	ADAM10	ADA10_HUMAN	42	0.9977	1
Human	LNT-229	O14672	CD156c	102	ADAM10	ADA10_HUMAN	42	0.9944	1
Human	P493-6	O14672	CD156c	102	ADAM10	ADA10_HUMAN	42	0.9932	1
Human	T98G	O14672	CD156c	102	ADAM10	ADA10_HUMAN	42	0.9963	1
Human	MedB-1	O14773	no	1200	TPP1	TPP1_HUMAN	6	1	2
Human	U-2 OS	O14773	no	1200	TPP1	TPP1_HUMAN	6	1	2
Human	RD	O14773	no	1200	TPP1	TPP1_HUMAN	6	0.9972	1
Human	Rh28	O14773	no	1200	TPP1	TPP1_HUMAN	6	0.9968	1
Human	Ruch-2	O14773	no	1200	TPP1	TPP1_HUMAN	6	0.9969	1
Human	T98G	O14773	no	1200	TPP1	TPP1_HUMAN	6	0.9963	1
Human	Glioblastoma exvivo	O14786	CD304	8829	NRP1	NRP1_HUMAN	27	1	11
Human	HCC4012	O14786	CD304	8829	NRP1	NRP1_HUMAN	27	1	11
Human	PASMC	O14786	CD304	8829	NRP1	NRP1_HUMAN	27	1	10
Human	U-251 MG	O14786	CD304	8829	NRP1	NRP1_HUMAN	27	1	8
Human	HEK	O14786	CD304	8829	NRP1	NRP1_HUMAN	27	1	7
Human	T98G	O14786	CD304	8829	NRP1	NRP1_HUMAN	27	1	7
Human	ZL55 MPM	O14786	CD304	8829	NRP1	NRP1_HUMAN	27	1	7
Human	Ruch-2	O14786	CD304	8829	NRP1	NRP1_HUMAN	27	1	6
Human	SDM104	O14786	CD304	8829	NRP1	NRP1_HUMAN	27	1	6
Human	SDM5	O14786	CD304	8829	NRP1	NRP1_HUMAN	27	1	6
Human	A-431	O14786	CD304	8829	NRP1	NRP1_HUMAN	27	1	4
Human	LN-18	O14786	CD304	8829	NRP1	NRP1_HUMAN	27	1	4
Human	U-2 OS	O14786	CD304	8829	NRP1	NRP1_HUMAN	27	1	4
Human	U-87 MG	O14786	CD304	8829	NRP1	NRP1_HUMAN	27	1	4
Human	786-O	O14786	CD304	8829	NRP1	NRP1_HUMAN	27	1	3
Human	B-All	O14786	CD304	8829	NRP1	NRP1_HUMAN	27	1	3
Human	LN-229	O14786	CD304	8829	NRP1	NRP1_HUMAN	27	1	3
Human	NB4	O14786	CD304	8829	NRP1	NRP1_HUMAN	27	1	3
Human	P493-6	O14786	CD304	8829	NRP1	NRP1_HUMAN	27	1	3
Human	HeLa	O14786	CD304	8829	NRP1	NRP1_HUMAN	27	1	2
Human	HL-60	O14786	CD304	8829	NRP1	NRP1_HUMAN	27	1	2
Human	hMSC	O14786	CD304	8829	NRP1	NRP1_HUMAN	27	1	2
Human	Rh28	O14786	CD304	8829	NRP1	NRP1_HUMAN	27	1	2
Human	SDM4	O14786	CD304	8829	NRP1	NRP1_HUMAN	27	1	2
Human	Adipocytes	O14786	CD304	8829	NRP1	NRP1_HUMAN	27	0.9941	1
Human	LNT-229	O14786	CD304	8829	NRP1	NRP1_HUMAN	27	0.9944	1
Human	RD	O14786	CD304	8829	NRP1	NRP1_HUMAN	27	0.9972	1
Human	L-428	O14817	no	7106	TSPAN4	TSN4_HUMAN	6	1	2
Human	T98G	O14817	no	7106	TSPAN4	TSN4_HUMAN	6	1	2
Human	Adipocytes	O14817	no	7106	TSPAN4	TSN4_HUMAN	6	0.9941	1
Human	Jurkat (clone E6-1)	O14817	no	7106	TSPAN4	TSN4_HUMAN	6	0.9913	1
Human	KM-H2	O14817	no	7106	TSPAN4	TSN4_HUMAN	6	0.9956	1
Human	SU-DHL-6	O14817	no	7106	TSPAN4	TSN4_HUMAN	6	0.9343	1
Human	SU-DHL-6	O14836	CD267	23495	TNFRSF13B	TR13B_HUMAN	1	0.9895	1
Human	U-251 MG	O14917	no	27253	PCDH17	PCD17_HUMAN	2	1	5
Human	HeLa	O14917	no	27253	PCDH17	PCD17_HUMAN	2	1	3
Human	NK cells	O14931	CD337	259197	NCR3	NCTR3_HUMAN	1	1	3
Human	B-All	O15031	no	23654	PLXNB2	PLXB2_HUMAN	40	1	59
Human	HL-60	O15031	no	23654	PLXNB2	PLXB2_HUMAN	40	1	46
Human	LN-18	O15031	no	23654	PLXNB2	PLXB2_HUMAN	40	1	32
Human	U-251 MG	O15031	no	23654	PLXNB2	PLXB2_HUMAN	40	1	32
Human	A-431	O15031	no	23654	PLXNB2	PLXB2_HUMAN	40	1	31
Human	HeLa	O15031	no	23654	PLXNB2	PLXB2_HUMAN	40	1	24
Human	Glioblastoma exvivo	O15031	no	23654	PLXNB2	PLXB2_HUMAN	40	1	23
Human	HEK	O15031	no	23654	PLXNB2	PLXB2_HUMAN	40	1	21
Human	IMR-32	O15031	no	23654	PLXNB2	PLXB2_HUMAN	40	1	21
Human	L-428	O15031	no	23654	PLXNB2	PLXB2_HUMAN	40	1	21
Human	KM-H2	O15031	no	23654	PLXNB2	PLXB2_HUMAN	40	1	20
Human	U-87 MG	O15031	no	23654	PLXNB2	PLXB2_HUMAN	40	1	20
Human	LN-229	O15031	no	23654	PLXNB2	PLXB2_HUMAN	40	1	19
Human	MedB-1	O15031	no	23654	PLXNB2	PLXB2_HUMAN	40	1	19
Human	P493-6	O15031	no	23654	PLXNB2	PLXB2_HUMAN	40	1	19
Human	PASMC	O15031	no	23654	PLXNB2	PLXB2_HUMAN	40	1	19
Human	T98G	O15031	no	23654	PLXNB2	PLXB2_HUMAN	40	1	19
Human	U-2 OS	O15031	no	23654	PLXNB2	PLXB2_HUMAN	40	1	19
Human	SDM104	O15031	no	23654	PLXNB2	PLXB2_HUMAN	40	1	18
Human	SDM5	O15031	no	23654	PLXNB2	PLXB2_HUMAN	40	1	15
Human	NB4	O15031	no	23654	PLXNB2	PLXB2_HUMAN	40	1	14
Human	U2932	O15031	no	23654	PLXNB2	PLXB2_HUMAN	40	1	13
Human	786-O	O15031	no	23654	PLXNB2	PLXB2_HUMAN	40	1	11
Human	HDLM-2	O15031	no	23654	PLXNB2	PLXB2_HUMAN	40	1	11
Human	SDM4	O15031	no	23654	PLXNB2	PLXB2_HUMAN	40	1	11
Human	CaLu-3	O15031	no	23654	PLXNB2	PLXB2_HUMAN	40	1	10
Human	Jurkat (clone E6-1)	O15031	no	23654	PLXNB2	PLXB2_HUMAN	40	1	10
Human	SU-DHL-6	O15031	no	23654	PLXNB2	PLXB2_HUMAN	40	1	10
Human	HCC4012	O15031	no	23654	PLXNB2	PLXB2_HUMAN	40	1	9
Human	HBL-1	O15031	no	23654	PLXNB2	PLXB2_HUMAN	40	1	7
Human	LNT-229	O15031	no	23654	PLXNB2	PLXB2_HUMAN	40	1	7
Human	Melanoma Adh	O15031	no	23654	PLXNB2	PLXB2_HUMAN	40	1	7
Human	ZL55 MPM	O15031	no	23654	PLXNB2	PLXB2_HUMAN	40	1	7
Human	Adipocytes	O15031	no	23654	PLXNB2	PLXB2_HUMAN	40	1	6
Human	Melanoma NSph	O15031	no	23654	PLXNB2	PLXB2_HUMAN	40	1	6
Human	RD	O15031	no	23654	PLXNB2	PLXB2_HUMAN	40	1	6
Human	Rh28	O15031	no	23654	PLXNB2	PLXB2_HUMAN	40	1	6
Human	RH4	O15031	no	23654	PLXNB2	PLXB2_HUMAN	40	1	5
Human	Ruch-2	O15031	no	23654	PLXNB2	PLXB2_HUMAN	40	1	5
Human	Lymphoma	O15031	no	23654	PLXNB2	PLXB2_HUMAN	40	1	4
Human	Melanoma NSph	O15118	no	4864	NPC1	NPC1_HUMAN	17	1	14
Human	Ruch-2	O15118	no	4864	NPC1	NPC1_HUMAN	17	1	12
Human	U-251 MG	O15118	no	4864	NPC1	NPC1_HUMAN	17	1	9
Human	RD	O15118	no	4864	NPC1	NPC1_HUMAN	17	1	8
Human	HEK	O15118	no	4864	NPC1	NPC1_HUMAN	17	1	7
Human	IMR-32	O15118	no	4864	NPC1	NPC1_HUMAN	17	1	7
Human	Melanoma Adh	O15118	no	4864	NPC1	NPC1_HUMAN	17	1	7
Human	Rh28	O15118	no	4864	NPC1	NPC1_HUMAN	17	1	6
Human	HeLa	O15118	no	4864	NPC1	NPC1_HUMAN	17	1	5
Human	SU4 (SU-DHL-4)	O15118	no	4864	NPC1	NPC1_HUMAN	17	0.9883	3
Human	U-2 OS	O15118	no	4864	NPC1	NPC1_HUMAN	17	1	3
Human	A-431	O15118	no	4864	NPC1	NPC1_HUMAN	17	0.9936	2
Human	Jurkat (clone E6-1)	O15118	no	4864	NPC1	NPC1_HUMAN	17	0.9993	2
Human	L-428	O15118	no	4864	NPC1	NPC1_HUMAN	17	0.9999	2
Human	Adipocytes	O15118	no	4864	NPC1	NPC1_HUMAN	17	0.9941	1
Human	MedB-1	O15118	no	4864	NPC1	NPC1_HUMAN	17	0.9931	1
Human	NK cells	O15118	no	4864	NPC1	NPC1_HUMAN	17	0.8954	1
Human	Adipocytes	O15230	no	3911	LAMA5	LAMA5_HUMAN	17	1	16
Human	Rh28	O15230	no	3911	LAMA5	LAMA5_HUMAN	17	1	7
Human	U-251 MG	O15230	no	3911	LAMA5	LAMA5_HUMAN	17	1	7
Human	LN-18	O15230	no	3911	LAMA5	LAMA5_HUMAN	17	1	5
Human	Melanoma NSph	O15230	no	3911	LAMA5	LAMA5_HUMAN	17	1	5
Human	Glioblastoma exvivo	O15230	no	3911	LAMA5	LAMA5_HUMAN	17	1	4
Human	SDM5	O15230	no	3911	LAMA5	LAMA5_HUMAN	17	1	4
Human	HEK	O15230	no	3911	LAMA5	LAMA5_HUMAN	17	1	3
Human	SDM4	O15230	no	3911	LAMA5	LAMA5_HUMAN	17	1	3
Human	A-431	O15230	no	3911	LAMA5	LAMA5_HUMAN	17	0.9989	2
Human	HeLa	O15230	no	3911	LAMA5	LAMA5_HUMAN	17	1	2
Human	RD	O15230	no	3911	LAMA5	LAMA5_HUMAN	17	0.9997	2
Human	U-2 OS	O15230	no	3911	LAMA5	LAMA5_HUMAN	17	0.9996	2
Human	U-87 MG	O15230	no	3911	LAMA5	LAMA5_HUMAN	17	1	2
Human	CaLu-3	O15230	no	3911	LAMA5	LAMA5_HUMAN	17	0.997	1
Human	P493-6	O15230	no	3911	LAMA5	LAMA5_HUMAN	17	0.9943	1
Human	ZL55 MPM	O15230	no	3911	LAMA5	LAMA5_HUMAN	17	0.9975	1
Human	HCC4012	O15321	no	10548	TM9SF1	TM9S1_HUMAN	17	1	2
Human	HBL-1	O15321	no	10548	TM9SF1	TM9S1_HUMAN	17	0.9239	1
Human	HEK	O15321	no	10548	TM9SF1	TM9S1_HUMAN	17	0.9946	1
Human	HeLa	O15321	no	10548	TM9SF1	TM9S1_HUMAN	17	0.992	1
Human	L-428	O15321	no	10548	TM9SF1	TM9S1_HUMAN	17	0.995	1
Human	LN-18	O15321	no	10548	TM9SF1	TM9S1_HUMAN	17	0.9292	1
Human	LN-229	O15321	no	10548	TM9SF1	TM9S1_HUMAN	17	0.9974	1
Human	Lymphoma	O15321	no	10548	TM9SF1	TM9S1_HUMAN	17	0.9928	1
Human	MedB-1	O15321	no	10548	TM9SF1	TM9S1_HUMAN	17	0.975	1
Human	Melanoma NSph	O15321	no	10548	TM9SF1	TM9S1_HUMAN	17	0.995	1
Human	RD	O15321	no	10548	TM9SF1	TM9S1_HUMAN	17	0.9941	1
Human	Rh28	O15321	no	10548	TM9SF1	TM9S1_HUMAN	17	0.9958	1
Human	Ruch-2	O15321	no	10548	TM9SF1	TM9S1_HUMAN	17	0.995	1
Human	T98G	O15321	no	10548	TM9SF1	TM9S1_HUMAN	17	0.9901	1
Human	U-2 OS	O15321	no	10548	TM9SF1	TM9S1_HUMAN	17	0.9961	1
Human	U-251 MG	O15321	no	10548	TM9SF1	TM9S1_HUMAN	17	0.9941	1
Human	U-87 MG	O15321	no	10548	TM9SF1	TM9S1_HUMAN	17	0.9798	1
Human	MedB-1	O15389	CD170	8778	SIGLEC5	SIGL5_HUMAN	7	1	5
Human	HL-60	O15389	CD170	8778	SIGLEC5	SIGL5_HUMAN	7	1	3
Human	Lymphoma	O15389	CD170	8778	SIGLEC5	SIGL5_HUMAN	7	1	3
Human	NB4	O15389	CD170	8778	SIGLEC5	SIGL5_HUMAN	7	1	3
Human	Adipocytes	O15389	CD170	8778	SIGLEC5	SIGL5_HUMAN	7	0.9941	1
Human	CD4+, CD25- Tcells	O15389	CD170	8778	SIGLEC5	SIGL5_HUMAN	7	0.9923	1
Human	NK cells	O15389	CD170	8778	SIGLEC5	SIGL5_HUMAN	7	0.991	1
Human	LN-18	O15394	no	4685	NCAM2	NCAM2_HUMAN	9	1	11
Human	SDM4	O15394	no	4685	NCAM2	NCAM2_HUMAN	9	1	10
Human	ZL55 MPM	O15394	no	4685	NCAM2	NCAM2_HUMAN	9	1	4
Human	PASMC	O15394	no	4685	NCAM2	NCAM2_HUMAN	9	1	3
Human	L-540	O15394	no	4685	NCAM2	NCAM2_HUMAN	9	0.9975	2
Human	LNT-229	O15394	no	4685	NCAM2	NCAM2_HUMAN	9	1	2
Human	P493-6	O15394	no	4685	NCAM2	NCAM2_HUMAN	9	1	2
Human	Glioblastoma exvivo	O15394	no	4685	NCAM2	NCAM2_HUMAN	9	0.9933	1
Human	SDM104	O15394	no	4685	NCAM2	NCAM2_HUMAN	9	0.8998	1
Human	Glioblastoma exvivo	O15439	no	10257	ABCC4	MRP4_HUMAN	4	1	2
Human	PASMC	O15439	no	10257	ABCC4	MRP4_HUMAN	4	1	2
Human	HEK	O15439	no	10257	ABCC4	MRP4_HUMAN	4	0.9946	1
Human	HeLa	O15439	no	10257	ABCC4	MRP4_HUMAN	4	0.992	1
Human	Glioblastoma exvivo	O15440	no	10057	ABCC5	MRP5_HUMAN	20	0.9998	2
Human	HL-60	O15440	no	10057	ABCC5	MRP5_HUMAN	20	1	2
Human	LN-18	O15440	no	10057	ABCC5	MRP5_HUMAN	20	1	2
Human	NB4	O15440	no	10057	ABCC5	MRP5_HUMAN	20	0.9995	2
Human	SDM5	O15440	no	10057	ABCC5	MRP5_HUMAN	20	1	2
Human	U-251 MG	O15440	no	10057	ABCC5	MRP5_HUMAN	20	1	2
Human	U2932	O15440	no	10057	ABCC5	MRP5_HUMAN	20	1	2
Human	HBL-1	O15440	no	10057	ABCC5	MRP5_HUMAN	20	0.9936	1
Human	HDLM-2	O15440	no	10057	ABCC5	MRP5_HUMAN	20	0.9945	1
Human	HEK	O15440	no	10057	ABCC5	MRP5_HUMAN	20	0.9946	1
Human	HeLa	O15440	no	10057	ABCC5	MRP5_HUMAN	20	0.992	1
Human	L-428	O15440	no	10057	ABCC5	MRP5_HUMAN	20	0.995	1
Human	L-540	O15440	no	10057	ABCC5	MRP5_HUMAN	20	0.9921	1
Human	MedB-1	O15440	no	10057	ABCC5	MRP5_HUMAN	20	0.9931	1
Human	RH4	O15440	no	10057	ABCC5	MRP5_HUMAN	20	0.9498	1
Human	SU-DHL-6	O15440	no	10057	ABCC5	MRP5_HUMAN	20	0.9895	1
Human	SU4 (SU-DHL-4)	O15440	no	10057	ABCC5	MRP5_HUMAN	20	0.9925	1
Human	T98G	O15440	no	10057	ABCC5	MRP5_HUMAN	20	0.9956	1
Human	U-2 OS	O15440	no	10057	ABCC5	MRP5_HUMAN	20	0.9571	1
Human	U-87 MG	O15440	no	10057	ABCC5	MRP5_HUMAN	20	0.9861	1
Human	Melanoma Adh	O15455	CD283	7098	TLR3	TLR3_HUMAN	7	1	3
Human	Melanoma NSph	O15455	CD283	7098	TLR3	TLR3_HUMAN	7	1	2
Human	LN-18	O15455	CD283	7098	TLR3	TLR3_HUMAN	7	0.9913	1
Human	NK cells	O15455	CD283	7098	TLR3	TLR3_HUMAN	7	0.9874	1
Human	Rh28	O15455	CD283	7098	TLR3	TLR3_HUMAN	7	0.8678	1
Human	T98G	O15455	CD283	7098	TLR3	TLR3_HUMAN	7	0.8509	1
Human	U-251 MG	O15455	CD283	7098	TLR3	TLR3_HUMAN	7	0.8215	1
Human	Ruch-2	O15460	no	8974	P4HA2	P4HA2_HUMAN	10	1	3
Human	U-2 OS	O15460	no	8974	P4HA2	P4HA2_HUMAN	10	1	3
Human	RD	O15460	no	8974	P4HA2	P4HA2_HUMAN	10	1	2
Human	Rh28	O15460	no	8974	P4HA2	P4HA2_HUMAN	10	1	2
Human	LN-18	O15460	no	8974	P4HA2	P4HA2_HUMAN	10	0.9927	1
Human	Melanoma NSph	O15460	no	8974	P4HA2	P4HA2_HUMAN	10	0.995	1
Human	PASMC	O15460	no	8974	P4HA2	P4HA2_HUMAN	10	0.9908	1
Human	SDM34	O15460	no	8974	P4HA2	P4HA2_HUMAN	10	0.9979	1
Human	T98G	O15460	no	8974	P4HA2	P4HA2_HUMAN	10	0.9963	1
Human	U-251 MG	O15460	no	8974	P4HA2	P4HA2_HUMAN	10	0.9954	1
Mouse	Neural stem cells (SVZ)	O35114	no	12492	Scarb2	SCRB2_MOUSE	29	1	21
Mouse	Min6	O35114	no	12492	Scarb2	SCRB2_MOUSE	29	1	12
Mouse	Neural stem cells (spinal cord)	O35114	no	12492	Scarb2	SCRB2_MOUSE	29	1	11
Mouse	J1_neurons	O35114	no	12492	Scarb2	SCRB2_MOUSE	29	1	8
Mouse	R1_defNCS 2°	O35114	no	12492	Scarb2	SCRB2_MOUSE	29	1	7
Mouse	R1_primNCS 1°	O35114	no	12492	Scarb2	SCRB2_MOUSE	29	1	7
Mouse	TTF-1_iPS	O35114	no	12492	Scarb2	SCRB2_MOUSE	29	1	7
Mouse	Adipocytes subcutaneous	O35114	no	12492	Scarb2	SCRB2_MOUSE	29	1	6
Mouse	D3_ES	O35114	no	12492	Scarb2	SCRB2_MOUSE	29	1	6
Mouse	2D4-iPS	O35114	no	12492	Scarb2	SCRB2_MOUSE	29	1	5
Mouse	MSC80	O35114	no	12492	Scarb2	SCRB2_MOUSE	29	1	5
Mouse	TH-1	O35114	no	12492	Scarb2	SCRB2_MOUSE	29	1	5
Mouse	Astroglia	O35114	no	12492	Scarb2	SCRB2_MOUSE	29	1	4
Mouse	J1_EB	O35114	no	12492	Scarb2	SCRB2_MOUSE	29	1	4
Mouse	Neural stem cells (forebrain)	O35114	no	12492	Scarb2	SCRB2_MOUSE	29	1	4
Mouse	R1_ES	O35114	no	12492	Scarb2	SCRB2_MOUSE	29	1	4
Mouse	159-2 ES	O35114	no	12492	Scarb2	SCRB2_MOUSE	29	1	3
Mouse	159-2 NP	O35114	no	12492	Scarb2	SCRB2_MOUSE	29	1	3
Mouse	GL261	O35114	no	12492	Scarb2	SCRB2_MOUSE	29	1	3
Mouse	R1_EB	O35114	no	12492	Scarb2	SCRB2_MOUSE	29	1	3
Mouse	Spleenocytes	O35114	no	12492	Scarb2	SCRB2_MOUSE	29	1	3
Mouse	TH-17	O35114	no	12492	Scarb2	SCRB2_MOUSE	29	1	3
Mouse	E14Tg2a	O35114	no	12492	Scarb2	SCRB2_MOUSE	29	1	2
Mouse	SMA560	O35114	no	12492	Scarb2	SCRB2_MOUSE	29	1	2
Mouse	TH-0	O35114	no	12492	Scarb2	SCRB2_MOUSE	29	1	2
Mouse	159-2 EB	O35114	no	12492	Scarb2	SCRB2_MOUSE	29	0.9936	1
Mouse	C2C12	O35114	no	12492	Scarb2	SCRB2_MOUSE	29	0.9934	1
Mouse	J1_NP	O35114	no	12492	Scarb2	SCRB2_MOUSE	29	0.9975	1
Mouse	R1_NP_4h	O35114	no	12492	Scarb2	SCRB2_MOUSE	29	0.9979	1
Mouse	Min6	O35118	no	14587	Gfra3	GFRA3_MOUSE	1	0.9941	1
Mouse	Astroglia	O35129	no	12034	Phb2	PHB2_MOUSE	7	1	4
Mouse	TH-1	O35129	no	12034	Phb2	PHB2_MOUSE	7	1	3
Mouse	Neural stem cells (SVZ)	O35129	no	12034	Phb2	PHB2_MOUSE	7	1	2
Mouse	E14Tg2a	O35129	no	12034	Phb2	PHB2_MOUSE	7	0.9951	1
Mouse	J1_neurons	O35129	no	12034	Phb2	PHB2_MOUSE	7	0.9973	1
Mouse	R1_EB	O35129	no	12034	Phb2	PHB2_MOUSE	7	0.9948	1
Mouse	TH-0	O35129	no	12034	Phb2	PHB2_MOUSE	7	0.931	1
Mouse	R1_primNCS 1°	O35134	no	20019	Polr1a	RPA1_MOUSE	4	0.973	2
Mouse	D3_ES	O35134	no	20019	Polr1a	RPA1_MOUSE	4	0.8244	1
Mouse	Neural stem cells (spinal cord)	O35134	no	20019	Polr1a	RPA1_MOUSE	4	0.8476	1
Mouse	Neural stem cells (SVZ)	O35134	no	20019	Polr1a	RPA1_MOUSE	4	0.8255	1
Mouse	Neural stem cells (forebrain)	O35136	no	17968	Ncam2	NCAM2_MOUSE	5	1	13
Mouse	J1_neurons	O35136	no	17968	Ncam2	NCAM2_MOUSE	5	1	7
Mouse	Neural stem cells (spinal cord)	O35136	no	17968	Ncam2	NCAM2_MOUSE	5	1	7
Mouse	Astroglia	O35136	no	17968	Ncam2	NCAM2_MOUSE	5	1	6
Mouse	Neural stem cells (SVZ)	O35136	no	17968	Ncam2	NCAM2_MOUSE	5	1	3
Mouse	159-2 NP	O35161	no	12614	Celsr1	CELR1_MOUSE	6	1	2
Mouse	J1_EB	O35161	no	12614	Celsr1	CELR1_MOUSE	6	1	2
Mouse	159-2 ES	O35161	no	12614	Celsr1	CELR1_MOUSE	6	0.9947	1
Mouse	Astroglia	O35161	no	12614	Celsr1	CELR1_MOUSE	6	0.9941	1
Mouse	R1_EB	O35161	no	12614	Celsr1	CELR1_MOUSE	6	0.9948	1
Mouse	R1_primNCS 1°	O35161	no	12614	Celsr1	CELR1_MOUSE	6	0.9979	1
Mouse	J1_neurons	O35219	no	16511	Kcnh2	KCNH2_MOUSE	2	0.9973	1
Mouse	MSC80	O35219	no	16511	Kcnh2	KCNH2_MOUSE	2	0.9933	1
Mouse	TH-1	O35235	CD254	21943	Tnfsf11	TNF11_MOUSE	2	1	2
Mouse	TH-17	O35235	CD254	21943	Tnfsf11	TNF11_MOUSE	2	0.9944	1
Mouse	R1_ES	O35316	no	21366	Slc6a6	SC6A6_MOUSE	21	1	12
Mouse	Min6	O35316	no	21366	Slc6a6	SC6A6_MOUSE	21	1	10
Mouse	MSC80	O35316	no	21366	Slc6a6	SC6A6_MOUSE	21	1	10
Mouse	TTF-1_iPS	O35316	no	21366	Slc6a6	SC6A6_MOUSE	21	1	7
Mouse	D3_ES	O35316	no	21366	Slc6a6	SC6A6_MOUSE	21	1	6
Mouse	Astroglia	O35316	no	21366	Slc6a6	SC6A6_MOUSE	21	1	5
Mouse	2D4-iPS	O35316	no	21366	Slc6a6	SC6A6_MOUSE	21	1	4
Mouse	J774.2	O35316	no	21366	Slc6a6	SC6A6_MOUSE	21	1	4
Mouse	C2C12	O35316	no	21366	Slc6a6	SC6A6_MOUSE	21	1	3
Mouse	Macrophages (BM-der.)	O35316	no	21366	Slc6a6	SC6A6_MOUSE	21	1	3
Mouse	E14Tg2a	O35316	no	21366	Slc6a6	SC6A6_MOUSE	21	1	2
Mouse	GL261	O35316	no	21366	Slc6a6	SC6A6_MOUSE	21	1	2
Mouse	159-2 EB	O35316	no	21366	Slc6a6	SC6A6_MOUSE	21	0.9729	1
Mouse	159-2 ES	O35316	no	21366	Slc6a6	SC6A6_MOUSE	21	0.9584	1
Mouse	J1_EB	O35316	no	21366	Slc6a6	SC6A6_MOUSE	21	0.9787	1
Mouse	Neural stem cells (spinal cord)	O35316	no	21366	Slc6a6	SC6A6_MOUSE	21	0.7735	1
Mouse	R1_defNCS 2°	O35316	no	21366	Slc6a6	SC6A6_MOUSE	21	0.9831	1
Mouse	R1_EB	O35316	no	21366	Slc6a6	SC6A6_MOUSE	21	0.9729	1
Mouse	Spleenocytes	O35316	no	21366	Slc6a6	SC6A6_MOUSE	21	0.9765	1
Mouse	TH-1	O35316	no	21366	Slc6a6	SC6A6_MOUSE	21	0.9193	1
Mouse	TH-17	O35316	no	21366	Slc6a6	SC6A6_MOUSE	21	0.9944	1
Mouse	Astroglia	O35375	no	18187	Nrp2	NRP2_MOUSE	14	1	2
Mouse	GL261	O35375	no	18187	Nrp2	NRP2_MOUSE	14	1	2
Mouse	J1_EB	O35375	no	18187	Nrp2	NRP2_MOUSE	14	1	2
Mouse	J1_neurons	O35375	no	18187	Nrp2	NRP2_MOUSE	14	1	2
Mouse	J774.2	O35375	no	18187	Nrp2	NRP2_MOUSE	14	1	2
Mouse	MSC80	O35375	no	18187	Nrp2	NRP2_MOUSE	14	1	2
Mouse	2D4-iPS	O35375	no	18187	Nrp2	NRP2_MOUSE	14	0.9966	1
Mouse	D3_ES	O35375	no	18187	Nrp2	NRP2_MOUSE	14	0.9966	1
Mouse	Macrophages (BM-der.)	O35375	no	18187	Nrp2	NRP2_MOUSE	14	0.9895	1
Mouse	Neural stem cells (SVZ)	O35375	no	18187	Nrp2	NRP2_MOUSE	14	0.9947	1
Mouse	R1_defNCS 2°	O35375	no	18187	Nrp2	NRP2_MOUSE	14	0.996	1
Mouse	R1_ES	O35375	no	18187	Nrp2	NRP2_MOUSE	14	0.9927	1
Mouse	SMA560	O35375	no	18187	Nrp2	NRP2_MOUSE	14	0.9962	1
Mouse	TTF-1_iPS	O35375	no	18187	Nrp2	NRP2_MOUSE	14	0.9955	1
Mouse	MSC80	O35379	no	17250	Abcc1	MRP1_MOUSE	11	1	4
Mouse	2D4-iPS	O35379	no	17250	Abcc1	MRP1_MOUSE	11	0.9966	1
Mouse	Astroglia	O35379	no	17250	Abcc1	MRP1_MOUSE	11	0.9941	1
Mouse	C2C12	O35379	no	17250	Abcc1	MRP1_MOUSE	11	0.9934	1
Mouse	D3_ES	O35379	no	17250	Abcc1	MRP1_MOUSE	11	0.9966	1
Mouse	E14Tg2a	O35379	no	17250	Abcc1	MRP1_MOUSE	11	0.9951	1
Mouse	J774.2	O35379	no	17250	Abcc1	MRP1_MOUSE	11	0.9935	1
Mouse	R1_ES	O35379	no	17250	Abcc1	MRP1_MOUSE	11	0.9927	1
Mouse	Spleenocytes	O35379	no	17250	Abcc1	MRP1_MOUSE	11	0.9945	1
Mouse	TH-1	O35379	no	17250	Abcc1	MRP1_MOUSE	11	0.9892	1
Mouse	TTF-1_iPS	O35379	no	17250	Abcc1	MRP1_MOUSE	11	0.9955	1
Mouse	159-2 NP	O35393	no	13643	Efnb3	EFNB3_MOUSE	13	1	6
Mouse	J1_neurons	O35393	no	13643	Efnb3	EFNB3_MOUSE	13	1	4
Mouse	159-2 EB	O35393	no	13643	Efnb3	EFNB3_MOUSE	13	1	2
Mouse	159-2 ES	O35393	no	13643	Efnb3	EFNB3_MOUSE	13	1	2
Mouse	Astroglia	O35393	no	13643	Efnb3	EFNB3_MOUSE	13	0.9996	2
Mouse	J1_EB	O35393	no	13643	Efnb3	EFNB3_MOUSE	13	1	2
Mouse	R1_EB	O35393	no	13643	Efnb3	EFNB3_MOUSE	13	1	2
Mouse	D3_ES	O35393	no	13643	Efnb3	EFNB3_MOUSE	13	0.987	1
Mouse	J1_NP	O35393	no	13643	Efnb3	EFNB3_MOUSE	13	0.9972	1
Mouse	Neural stem cells (forebrain)	O35393	no	13643	Efnb3	EFNB3_MOUSE	13	0.9874	1
Mouse	Neural stem cells (spinal cord)	O35393	no	13643	Efnb3	EFNB3_MOUSE	13	0.996	1
Mouse	Neural stem cells (SVZ)	O35393	no	13643	Efnb3	EFNB3_MOUSE	13	0.995	1
Mouse	R1_defNCS 2°	O35393	no	13643	Efnb3	EFNB3_MOUSE	13	0.9956	1
Mouse	J1_neurons	O35405	no	18807	Pld3	PLD3_MOUSE	6	1	4
Mouse	Min6	O35405	no	18807	Pld3	PLD3_MOUSE	6	1	3
Mouse	Neural stem cells (spinal cord)	O35405	no	18807	Pld3	PLD3_MOUSE	6	1	3
Mouse	Neural stem cells (SVZ)	O35405	no	18807	Pld3	PLD3_MOUSE	6	1	2
Mouse	R1_defNCS 2°	O35405	no	18807	Pld3	PLD3_MOUSE	6	1	2
Mouse	TH-1	O35405	no	18807	Pld3	PLD3_MOUSE	6	0.9953	1
Mouse	Astroglia	O35409	no	53320	Folh1	FOLH1_MOUSE	2	1	3
Mouse	Adipocytes subcutaneous	O35409	no	53320	Folh1	FOLH1_MOUSE	2	0.9716	1
Mouse	J1_neurons	O35454	no	26372	Clcn6	CLCN6_MOUSE	7	1	2
Mouse	R1_defNCS 2°	O35454	no	26372	Clcn6	CLCN6_MOUSE	7	1	2
Mouse	R1_primNCS 1°	O35454	no	26372	Clcn6	CLCN6_MOUSE	7	1	2
Mouse	J1_EB	O35454	no	26372	Clcn6	CLCN6_MOUSE	7	0.9965	1
Mouse	Neural stem cells (spinal cord)	O35454	no	26372	Clcn6	CLCN6_MOUSE	7	0.9969	1
Mouse	Neural stem cells (SVZ)	O35454	no	26372	Clcn6	CLCN6_MOUSE	7	0.9963	1
Mouse	R1_ES	O35454	no	26372	Clcn6	CLCN6_MOUSE	7	0.992	1
Mouse	J774.2	O35516	no	18129	Notch2	NOTC2_MOUSE	2	0.9928	1
Mouse	MSC80	O35516	no	18129	Notch2	NOTC2_MOUSE	2	0.9926	1
Mouse	Min6	O35566	CD151	12476	Cd151	CD151_MOUSE	10	1	15
Mouse	MSC80	O35566	CD151	12476	Cd151	CD151_MOUSE	10	1	5
Mouse	Astroglia	O35566	CD151	12476	Cd151	CD151_MOUSE	10	1	3
Mouse	GL261	O35566	CD151	12476	Cd151	CD151_MOUSE	10	0.9998	3
Mouse	Neural stem cells (forebrain)	O35566	CD151	12476	Cd151	CD151_MOUSE	10	1	2
Mouse	R1_ES	O35566	CD151	12476	Cd151	CD151_MOUSE	10	1	2
Mouse	159-2 EB	O35566	CD151	12476	Cd151	CD151_MOUSE	10	0.9936	1
Mouse	E14Tg2a	O35566	CD151	12476	Cd151	CD151_MOUSE	10	0.9951	1
Mouse	Neural stem cells (spinal cord)	O35566	CD151	12476	Cd151	CD151_MOUSE	10	0.9972	1
Mouse	R1_EB	O35566	CD151	12476	Cd151	CD151_MOUSE	10	0.9936	1
Mouse	MSC80	O35598	CD156c	11487	Adam10	ADA10_MOUSE	27	1	20
Mouse	Astroglia	O35598	CD156c	11487	Adam10	ADA10_MOUSE	27	1	11
Mouse	Min6	O35598	CD156c	11487	Adam10	ADA10_MOUSE	27	1	10
Mouse	GL261	O35598	CD156c	11487	Adam10	ADA10_MOUSE	27	1	9
Mouse	Neural stem cells (spinal cord)	O35598	CD156c	11487	Adam10	ADA10_MOUSE	27	1	6
Mouse	159-2 NP	O35598	CD156c	11487	Adam10	ADA10_MOUSE	27	1	5
Mouse	J1_EB	O35598	CD156c	11487	Adam10	ADA10_MOUSE	27	1	5
Mouse	R1_defNCS 2°	O35598	CD156c	11487	Adam10	ADA10_MOUSE	27	1	5
Mouse	R1_primNCS 1°	O35598	CD156c	11487	Adam10	ADA10_MOUSE	27	1	5
Mouse	159-2 EB	O35598	CD156c	11487	Adam10	ADA10_MOUSE	27	1	4
Mouse	159-2 ES	O35598	CD156c	11487	Adam10	ADA10_MOUSE	27	1	4
Mouse	E14Tg2a	O35598	CD156c	11487	Adam10	ADA10_MOUSE	27	1	4
Mouse	J1_neurons	O35598	CD156c	11487	Adam10	ADA10_MOUSE	27	1	4
Mouse	Macrophages (BM-der.)	O35598	CD156c	11487	Adam10	ADA10_MOUSE	27	1	4
Mouse	Neural stem cells (forebrain)	O35598	CD156c	11487	Adam10	ADA10_MOUSE	27	1	4
Mouse	R1_EB	O35598	CD156c	11487	Adam10	ADA10_MOUSE	27	1	4
Mouse	Spleenocytes	O35598	CD156c	11487	Adam10	ADA10_MOUSE	27	1	4
Mouse	Neural stem cells (SVZ)	O35598	CD156c	11487	Adam10	ADA10_MOUSE	27	1	3
Mouse	SMA560	O35598	CD156c	11487	Adam10	ADA10_MOUSE	27	1	3
Mouse	TH-0	O35598	CD156c	11487	Adam10	ADA10_MOUSE	27	1	3
Mouse	J774.2	O35598	CD156c	11487	Adam10	ADA10_MOUSE	27	1	2
Mouse	TH-1	O35598	CD156c	11487	Adam10	ADA10_MOUSE	27	1	2
Mouse	Adipocytes subcutaneous	O35598	CD156c	11487	Adam10	ADA10_MOUSE	27	0.9959	1
Mouse	D3_ES	O35598	CD156c	11487	Adam10	ADA10_MOUSE	27	0.9932	1
Mouse	J1_NP	O35598	CD156c	11487	Adam10	ADA10_MOUSE	27	0.9975	1
Mouse	R1_ES	O35598	CD156c	11487	Adam10	ADA10_MOUSE	27	0.9927	1
Mouse	R1_NP_4h	O35598	CD156c	11487	Adam10	ADA10_MOUSE	27	0.9979	1
Mouse	Neural stem cells (SVZ)	O35604	no	18145	Npc1	NPC1_MOUSE	20	1	12
Mouse	R1_defNCS 2°	O35604	no	18145	Npc1	NPC1_MOUSE	20	1	9
Mouse	Neural stem cells (spinal cord)	O35604	no	18145	Npc1	NPC1_MOUSE	20	1	8
Mouse	J1_neurons	O35604	no	18145	Npc1	NPC1_MOUSE	20	1	6
Mouse	J1_EB	O35604	no	18145	Npc1	NPC1_MOUSE	20	1	3
Mouse	R1_EB	O35604	no	18145	Npc1	NPC1_MOUSE	20	1	3
Mouse	R1_ES	O35604	no	18145	Npc1	NPC1_MOUSE	20	1	3
Mouse	R1_primNCS 1°	O35604	no	18145	Npc1	NPC1_MOUSE	20	1	3
Mouse	TH-1	O35604	no	18145	Npc1	NPC1_MOUSE	20	1	3
Mouse	2D4-iPS	O35604	no	18145	Npc1	NPC1_MOUSE	20	1	2
Mouse	D3_ES	O35604	no	18145	Npc1	NPC1_MOUSE	20	1	2
Mouse	Neural stem cells (forebrain)	O35604	no	18145	Npc1	NPC1_MOUSE	20	1	2
Mouse	TTF-1_iPS	O35604	no	18145	Npc1	NPC1_MOUSE	20	0.9996	2
Mouse	159-2 NP	O35604	no	18145	Npc1	NPC1_MOUSE	20	0.9951	1
Mouse	Adipocytes subcutaneous	O35604	no	18145	Npc1	NPC1_MOUSE	20	0.9943	1
Mouse	Astroglia	O35604	no	18145	Npc1	NPC1_MOUSE	20	0.8844	1
Mouse	Min6	O35604	no	18145	Npc1	NPC1_MOUSE	20	0.8883	1
Mouse	MSC80	O35604	no	18145	Npc1	NPC1_MOUSE	20	0.9863	1
Mouse	R1_NP_4h	O35604	no	18145	Npc1	NPC1_MOUSE	20	0.9979	1
Mouse	SMA560	O35604	no	18145	Npc1	NPC1_MOUSE	20	0.9962	1
Mouse	J1_neurons	O35607	no	12168	Bmpr2	BMPR2_MOUSE	17	1	4
Mouse	Astroglia	O35607	no	12168	Bmpr2	BMPR2_MOUSE	17	1	2
Mouse	GL261	O35607	no	12168	Bmpr2	BMPR2_MOUSE	17	1	2
Mouse	J1_EB	O35607	no	12168	Bmpr2	BMPR2_MOUSE	17	1	2
Mouse	J1_NP	O35607	no	12168	Bmpr2	BMPR2_MOUSE	17	1	2
Mouse	MSC80	O35607	no	12168	Bmpr2	BMPR2_MOUSE	17	1	2
Mouse	Neural stem cells (forebrain)	O35607	no	12168	Bmpr2	BMPR2_MOUSE	17	1	2
Mouse	Neural stem cells (spinal cord)	O35607	no	12168	Bmpr2	BMPR2_MOUSE	17	1	2
Mouse	Neural stem cells (SVZ)	O35607	no	12168	Bmpr2	BMPR2_MOUSE	17	1	2
Mouse	R1_defNCS 2°	O35607	no	12168	Bmpr2	BMPR2_MOUSE	17	1	2
Mouse	R1_primNCS 1°	O35607	no	12168	Bmpr2	BMPR2_MOUSE	17	1	2
Mouse	SMA560	O35607	no	12168	Bmpr2	BMPR2_MOUSE	17	1	2
Mouse	2D4-iPS	O35607	no	12168	Bmpr2	BMPR2_MOUSE	17	0.9966	1
Mouse	D3_ES	O35607	no	12168	Bmpr2	BMPR2_MOUSE	17	0.9976	1
Mouse	Min6	O35607	no	12168	Bmpr2	BMPR2_MOUSE	17	0.9941	1
Mouse	R1_ES	O35607	no	12168	Bmpr2	BMPR2_MOUSE	17	0.9927	1
Mouse	TTF-1_iPS	O35607	no	12168	Bmpr2	BMPR2_MOUSE	17	0.9955	1
Mouse	159-2 ES	O35632	no	15587	Hyal2	HYAL2_MOUSE	4	1	4
Mouse	R1_EB	O35632	no	15587	Hyal2	HYAL2_MOUSE	4	1	4
Mouse	159-2 NP	O35632	no	15587	Hyal2	HYAL2_MOUSE	4	1	2
Mouse	R1_ES	O35632	no	15587	Hyal2	HYAL2_MOUSE	4	0.9994	2
Mouse	Min6	O35659	no	14652	Glp1r	GLP1R_MOUSE	1	1	4
Mouse	Astroglia	O35664	no	15976	Ifnar2	INAR2_MOUSE	4	1	3
Mouse	GL261	O35664	no	15976	Ifnar2	INAR2_MOUSE	4	0.988	1
Mouse	Macrophages (BM-der.)	O35664	no	15976	Ifnar2	INAR2_MOUSE	4	0.9895	1
Mouse	Spleenocytes	O35664	no	15976	Ifnar2	INAR2_MOUSE	4	0.9945	1
Mouse	J1_EB	O35696	no	20450	St8sia2	SIA8B_MOUSE	3	0.9992	2
Mouse	J1_neurons	O35696	no	20450	St8sia2	SIA8B_MOUSE	3	1	2
Mouse	R1_defNCS 2°	O35696	no	20450	St8sia2	SIA8B_MOUSE	3	0.996	1
Mouse	TH-1	O35714	no	21936	Tnfrsf18	TNR18_MOUSE	3	1	8
Mouse	TH-17	O35714	no	21936	Tnfrsf18	TNR18_MOUSE	3	1	6
Mouse	TH-0	O35714	no	21936	Tnfrsf18	TNR18_MOUSE	3	0.9257	1
Mouse	Astroglia	O35874	no	55963	Slc1a4	SATT_MOUSE	28	1	15
Mouse	E14Tg2a	O35874	no	55963	Slc1a4	SATT_MOUSE	28	1	13
Mouse	J1_neurons	O35874	no	55963	Slc1a4	SATT_MOUSE	28	1	10
Mouse	Neural stem cells (forebrain)	O35874	no	55963	Slc1a4	SATT_MOUSE	28	1	10
Mouse	Neural stem cells (spinal cord)	O35874	no	55963	Slc1a4	SATT_MOUSE	28	1	10
Mouse	D3_ES	O35874	no	55963	Slc1a4	SATT_MOUSE	28	1	9
Mouse	R1_ES	O35874	no	55963	Slc1a4	SATT_MOUSE	28	1	9
Mouse	2D4-iPS	O35874	no	55963	Slc1a4	SATT_MOUSE	28	1	7
Mouse	GL261	O35874	no	55963	Slc1a4	SATT_MOUSE	28	1	7
Mouse	Neural stem cells (SVZ)	O35874	no	55963	Slc1a4	SATT_MOUSE	28	1	7
Mouse	TH-1	O35874	no	55963	Slc1a4	SATT_MOUSE	28	1	6
Mouse	SMA560	O35874	no	55963	Slc1a4	SATT_MOUSE	28	1	5
Mouse	C2C12	O35874	no	55963	Slc1a4	SATT_MOUSE	28	1	4
Mouse	J774.2	O35874	no	55963	Slc1a4	SATT_MOUSE	28	1	4
Mouse	Min6	O35874	no	55963	Slc1a4	SATT_MOUSE	28	1	4
Mouse	MSC80	O35874	no	55963	Slc1a4	SATT_MOUSE	28	1	4
Mouse	TTF-1_iPS	O35874	no	55963	Slc1a4	SATT_MOUSE	28	1	4
Mouse	159-2 EB	O35874	no	55963	Slc1a4	SATT_MOUSE	28	1	3
Mouse	159-2 NP	O35874	no	55963	Slc1a4	SATT_MOUSE	28	1	3
Mouse	R1_EB	O35874	no	55963	Slc1a4	SATT_MOUSE	28	1	3
Mouse	159-2 ES	O35874	no	55963	Slc1a4	SATT_MOUSE	28	1	2
Mouse	J1_EB	O35874	no	55963	Slc1a4	SATT_MOUSE	28	1	2
Mouse	R1_defNCS 2°	O35874	no	55963	Slc1a4	SATT_MOUSE	28	1	2
Mouse	R1_NP_4h	O35874	no	55963	Slc1a4	SATT_MOUSE	28	1	2
Mouse	R1_primNCS 1°	O35874	no	55963	Slc1a4	SATT_MOUSE	28	1	2
Mouse	J1_NP	O35874	no	55963	Slc1a4	SATT_MOUSE	28	0.9975	1
Mouse	Macrophages (BM-der.)	O35874	no	55963	Slc1a4	SATT_MOUSE	28	0.9895	1
Mouse	Spleenocytes	O35874	no	55963	Slc1a4	SATT_MOUSE	28	0.9945	1
Mouse	R1_primNCS 1°	O35887	no	12321	Calu	CALU_MOUSE	9	1	3
Mouse	2D4-iPS	O35887	no	12321	Calu	CALU_MOUSE	9	0.9966	1
Mouse	D3_ES	O35887	no	12321	Calu	CALU_MOUSE	9	0.9966	1
Mouse	Neural stem cells (spinal cord)	O35887	no	12321	Calu	CALU_MOUSE	9	0.9972	1
Mouse	Neural stem cells (SVZ)	O35887	no	12321	Calu	CALU_MOUSE	9	0.9967	1
Mouse	R1_defNCS 2°	O35887	no	12321	Calu	CALU_MOUSE	9	0.996	1
Mouse	R1_EB	O35887	no	12321	Calu	CALU_MOUSE	9	0.9948	1
Mouse	R1_ES	O35887	no	12321	Calu	CALU_MOUSE	9	0.9927	1
Mouse	TTF-1_iPS	O35887	no	12321	Calu	CALU_MOUSE	9	0.9955	1
Mouse	TH-0	O35975	no	11872	Art2b	NAR2B_MOUSE	1	0.9924	1
Human	Glioblastoma exvivo	O43155	no	23768	FLRT2	FLRT2_HUMAN	9	1	3
Human	U-251 MG	O43155	no	23768	FLRT2	FLRT2_HUMAN	9	1	3
Human	PASMC	O43155	no	23768	FLRT2	FLRT2_HUMAN	9	1	2
Human	IMR-32	O43155	no	23768	FLRT2	FLRT2_HUMAN	9	0.9909	1
Human	LN-18	O43155	no	23768	FLRT2	FLRT2_HUMAN	9	0.9927	1
Human	RD	O43155	no	23768	FLRT2	FLRT2_HUMAN	9	0.9972	1
Human	Rh28	O43155	no	23768	FLRT2	FLRT2_HUMAN	9	0.9968	1
Human	Ruch-2	O43155	no	23768	FLRT2	FLRT2_HUMAN	9	0.9969	1
Human	U-2 OS	O43155	no	23768	FLRT2	FLRT2_HUMAN	9	0.9928	1
Human	B-All	O43157	no	5364	PLXNB1	PLXB1_HUMAN	25	1	2
Human	HeLa	O43157	no	5364	PLXNB1	PLXB1_HUMAN	25	1	2
Human	LN-18	O43157	no	5364	PLXNB1	PLXB1_HUMAN	25	0.9982	2
Human	U-87 MG	O43157	no	5364	PLXNB1	PLXB1_HUMAN	25	0.9993	2
Human	A-431	O43157	no	5364	PLXNB1	PLXB1_HUMAN	25	0.9935	1
Human	Adipocytes	O43157	no	5364	PLXNB1	PLXB1_HUMAN	25	0.9941	1
Human	CaLu-3	O43157	no	5364	PLXNB1	PLXB1_HUMAN	25	0.9961	1
Human	Glioblastoma exvivo	O43157	no	5364	PLXNB1	PLXB1_HUMAN	25	0.9939	1
Human	HCC4012	O43157	no	5364	PLXNB1	PLXB1_HUMAN	25	0.9803	1
Human	HDLM-2	O43157	no	5364	PLXNB1	PLXB1_HUMAN	25	0.9945	1
Human	HEK	O43157	no	5364	PLXNB1	PLXB1_HUMAN	25	0.9946	1
Human	IMR-32	O43157	no	5364	PLXNB1	PLXB1_HUMAN	25	0.9827	1
Human	Jurkat (clone E6-1)	O43157	no	5364	PLXNB1	PLXB1_HUMAN	25	0.9629	1
Human	LN-229	O43157	no	5364	PLXNB1	PLXB1_HUMAN	25	0.9977	1
Human	LNT-229	O43157	no	5364	PLXNB1	PLXB1_HUMAN	25	0.9953	1
Human	Melanoma Adh	O43157	no	5364	PLXNB1	PLXB1_HUMAN	25	0.9915	1
Human	Melanoma NSph	O43157	no	5364	PLXNB1	PLXB1_HUMAN	25	0.995	1
Human	P493-6	O43157	no	5364	PLXNB1	PLXB1_HUMAN	25	0.9943	1
Human	PASMC	O43157	no	5364	PLXNB1	PLXB1_HUMAN	25	0.9908	1
Human	SDM4	O43157	no	5364	PLXNB1	PLXB1_HUMAN	25	0.9966	1
Human	SDM5	O43157	no	5364	PLXNB1	PLXB1_HUMAN	25	0.9958	1
Human	T98G	O43157	no	5364	PLXNB1	PLXB1_HUMAN	25	0.9963	1
Human	U-2 OS	O43157	no	5364	PLXNB1	PLXB1_HUMAN	25	0.9896	1
Human	U-251 MG	O43157	no	5364	PLXNB1	PLXB1_HUMAN	25	0.9954	1
Human	ZL55 MPM	O43157	no	5364	PLXNB1	PLXB1_HUMAN	25	0.9975	1
Human	RD	O43184	no	8038	ADAM12	ADA12_HUMAN	2	0.9972	1
Human	U-251 MG	O43184	no	8038	ADAM12	ADA12_HUMAN	2	0.9954	1
Human	A-431	O43194	no	2863	GPR39	GPR39_HUMAN	11	1	3
Human	CaLu-3	O43194	no	2863	GPR39	GPR39_HUMAN	11	1	3
Human	U-251 MG	O43194	no	2863	GPR39	GPR39_HUMAN	11	1	3
Human	Glioblastoma exvivo	O43194	no	2863	GPR39	GPR39_HUMAN	11	1	2
Human	HCC4012	O43194	no	2863	GPR39	GPR39_HUMAN	11	1	2
Human	LN-18	O43194	no	2863	GPR39	GPR39_HUMAN	11	0.9997	2
Human	HeLa	O43194	no	2863	GPR39	GPR39_HUMAN	11	0.992	1
Human	SDM104	O43194	no	2863	GPR39	GPR39_HUMAN	11	0.9919	1
Human	SDM4	O43194	no	2863	GPR39	GPR39_HUMAN	11	0.9966	1
Human	SDM5	O43194	no	2863	GPR39	GPR39_HUMAN	11	0.9941	1
Human	U-2 OS	O43194	no	2863	GPR39	GPR39_HUMAN	11	0.9961	1
Human	RD	O43286	no	9334	B4GALT5	B4GT5_HUMAN	2	0.9972	1
Human	Rh28	O43286	no	9334	B4GALT5	B4GT5_HUMAN	2	0.9968	1
Human	Adipocytes	O43306	no	112	ADCY6	ADCY6_HUMAN	2	1	2
Human	CD4+, CD25- Tcells	O43306	no	112	ADCY6	ADCY6_HUMAN	2	0.9923	1
Human	HEK	O43462	no	51360	MBTPS2	MBTP2_HUMAN	7	0.9946	1
Human	HeLa	O43462	no	51360	MBTPS2	MBTP2_HUMAN	7	0.992	1
Human	IMR-32	O43462	no	51360	MBTPS2	MBTP2_HUMAN	7	0.8748	1
Human	Melanoma NSph	O43462	no	51360	MBTPS2	MBTP2_HUMAN	7	0.995	1
Human	RD	O43462	no	51360	MBTPS2	MBTP2_HUMAN	7	0.9972	1
Human	Ruch-2	O43462	no	51360	MBTPS2	MBTP2_HUMAN	7	0.9969	1
Human	U-251 MG	O43462	no	51360	MBTPS2	MBTP2_HUMAN	7	0.9954	1
Human	B-All	O43490	CD133	8842	PROM1	PROM1_HUMAN	6	1	4
Human	CaLu-3	O43490	CD133	8842	PROM1	PROM1_HUMAN	6	1	4
Human	Rh28	O43490	CD133	8842	PROM1	PROM1_HUMAN	6	1	4
Human	RD	O43490	CD133	8842	PROM1	PROM1_HUMAN	6	1	2
Human	HEK	O43490	CD133	8842	PROM1	PROM1_HUMAN	6	0.9946	1
Human	U-251 MG	O43490	CD133	8842	PROM1	PROM1_HUMAN	6	0.8648	1
Human	T98G	O43505	no	11041	B3GNT1	B3GN1_HUMAN	9	1	6
Human	LN-18	O43505	no	11041	B3GNT1	B3GN1_HUMAN	9	1	4
Human	HEK	O43505	no	11041	B3GNT1	B3GN1_HUMAN	9	1	3
Human	U-251 MG	O43505	no	11041	B3GNT1	B3GN1_HUMAN	9	1	3
Human	LN-229	O43505	no	11041	B3GNT1	B3GN1_HUMAN	9	1	2
Human	U-87 MG	O43505	no	11041	B3GNT1	B3GN1_HUMAN	9	1	2
Human	Melanoma NSph	O43505	no	11041	B3GNT1	B3GN1_HUMAN	9	0.995	1
Human	RD	O43505	no	11041	B3GNT1	B3GN1_HUMAN	9	0.9972	1
Human	Ruch-2	O43505	no	11041	B3GNT1	B3GN1_HUMAN	9	0.9969	1
Human	Melanoma Adh	O43556	no	8910	SGCE	SGCE_HUMAN	17	1	2
Human	Melanoma NSph	O43556	no	8910	SGCE	SGCE_HUMAN	17	1	2
Human	RD	O43556	no	8910	SGCE	SGCE_HUMAN	17	1	2
Human	Rh28	O43556	no	8910	SGCE	SGCE_HUMAN	17	1	2
Human	Ruch-2	O43556	no	8910	SGCE	SGCE_HUMAN	17	1	2
Human	Adipocytes	O43556	no	8910	SGCE	SGCE_HUMAN	17	0.9941	1
Human	Glioblastoma exvivo	O43556	no	8910	SGCE	SGCE_HUMAN	17	0.9939	1
Human	HeLa	O43556	no	8910	SGCE	SGCE_HUMAN	17	0.992	1
Human	KM-H2	O43556	no	8910	SGCE	SGCE_HUMAN	17	0.9759	1
Human	L-428	O43556	no	8910	SGCE	SGCE_HUMAN	17	0.995	1
Human	LN-18	O43556	no	8910	SGCE	SGCE_HUMAN	17	0.9927	1
Human	LN-229	O43556	no	8910	SGCE	SGCE_HUMAN	17	0.9891	1
Human	SU-DHL-6	O43556	no	8910	SGCE	SGCE_HUMAN	17	0.9895	1
Human	T98G	O43556	no	8910	SGCE	SGCE_HUMAN	17	0.9963	1
Human	U-2 OS	O43556	no	8910	SGCE	SGCE_HUMAN	17	0.9961	1
Human	U-251 MG	O43556	no	8910	SGCE	SGCE_HUMAN	17	0.9954	1
Human	U2932	O43556	no	8910	SGCE	SGCE_HUMAN	17	0.9854	1
Human	Melanoma Adh	O43567	no	11342	RNF13	RNF13_HUMAN	11	1	3
Human	RD	O43567	no	11342	RNF13	RNF13_HUMAN	11	1	3
Human	Rh28	O43567	no	11342	RNF13	RNF13_HUMAN	11	1	3
Human	Ruch-2	O43567	no	11342	RNF13	RNF13_HUMAN	11	1	3
Human	U-251 MG	O43567	no	11342	RNF13	RNF13_HUMAN	11	1	3
Human	Melanoma NSph	O43567	no	11342	RNF13	RNF13_HUMAN	11	1	2
Human	U-87 MG	O43567	no	11342	RNF13	RNF13_HUMAN	11	1	2
Human	HEK	O43567	no	11342	RNF13	RNF13_HUMAN	11	0.9946	1
Human	HeLa	O43567	no	11342	RNF13	RNF13_HUMAN	11	0.992	1
Human	LN-18	O43567	no	11342	RNF13	RNF13_HUMAN	11	0.9927	1
Human	SU-DHL-6	O43567	no	11342	RNF13	RNF13_HUMAN	11	0.8469	1
Human	786-O	O43570	no	771	CA12	CAH12_HUMAN	8	1	4
Human	Glioblastoma exvivo	O43570	no	771	CA12	CAH12_HUMAN	8	1	4
Human	T98G	O43570	no	771	CA12	CAH12_HUMAN	8	1	4
Human	PASMC	O43570	no	771	CA12	CAH12_HUMAN	8	1	3
Human	LN-18	O43570	no	771	CA12	CAH12_HUMAN	8	1	2
Human	LN-229	O43570	no	771	CA12	CAH12_HUMAN	8	1	2
Human	P493-6	O43570	no	771	CA12	CAH12_HUMAN	8	1	2
Human	SDM104	O43570	no	771	CA12	CAH12_HUMAN	8	0.9026	1
Human	HEK	O43657	no	7105	TSPAN6	TSN6_HUMAN	20	1	3
Human	LN-18	O43657	no	7105	TSPAN6	TSN6_HUMAN	20	1	3
Human	U-251 MG	O43657	no	7105	TSPAN6	TSN6_HUMAN	20	1	3
Human	Glioblastoma exvivo	O43657	no	7105	TSPAN6	TSN6_HUMAN	20	1	2
Human	LN-229	O43657	no	7105	TSPAN6	TSN6_HUMAN	20	1	2
Human	Melanoma NSph	O43657	no	7105	TSPAN6	TSN6_HUMAN	20	1	2
Human	A-431	O43657	no	7105	TSPAN6	TSN6_HUMAN	20	0.9902	1
Human	Adipocytes	O43657	no	7105	TSPAN6	TSN6_HUMAN	20	0.9838	1
Human	CaLu-3	O43657	no	7105	TSPAN6	TSN6_HUMAN	20	0.8982	1
Human	HCC4012	O43657	no	7105	TSPAN6	TSN6_HUMAN	20	0.9643	1
Human	HeLa	O43657	no	7105	TSPAN6	TSN6_HUMAN	20	0.9888	1
Human	PASMC	O43657	no	7105	TSPAN6	TSN6_HUMAN	20	0.9826	1
Human	RD	O43657	no	7105	TSPAN6	TSN6_HUMAN	20	0.9924	1
Human	Rh28	O43657	no	7105	TSPAN6	TSN6_HUMAN	20	0.8154	1
Human	SDM104	O43657	no	7105	TSPAN6	TSN6_HUMAN	20	0.9321	1
Human	SDM5	O43657	no	7105	TSPAN6	TSN6_HUMAN	20	0.8823	1
Human	T98G	O43657	no	7105	TSPAN6	TSN6_HUMAN	20	0.9949	1
Human	U-2 OS	O43657	no	7105	TSPAN6	TSN6_HUMAN	20	0.9934	1
Human	U-87 MG	O43657	no	7105	TSPAN6	TSN6_HUMAN	20	0.9921	1
Human	ZL55 MPM	O43657	no	7105	TSPAN6	TSN6_HUMAN	20	0.9921	1
Human	A-431	O43688	no	8612	PPAP2C	LPP2_HUMAN	17	0.9935	1
Human	CaLu-3	O43688	no	8612	PPAP2C	LPP2_HUMAN	17	0.9961	1
Human	Glioblastoma exvivo	O43688	no	8612	PPAP2C	LPP2_HUMAN	17	0.9939	1
Human	HCC4012	O43688	no	8612	PPAP2C	LPP2_HUMAN	17	0.9967	1
Human	HeLa	O43688	no	8612	PPAP2C	LPP2_HUMAN	17	0.992	1
Human	LN-18	O43688	no	8612	PPAP2C	LPP2_HUMAN	17	0.9927	1
Human	LN-229	O43688	no	8612	PPAP2C	LPP2_HUMAN	17	0.9901	1
Human	LNT-229	O43688	no	8612	PPAP2C	LPP2_HUMAN	17	0.9944	1
Human	Melanoma NSph	O43688	no	8612	PPAP2C	LPP2_HUMAN	17	0.995	1
Human	P493-6	O43688	no	8612	PPAP2C	LPP2_HUMAN	17	0.9836	1
Human	RD	O43688	no	8612	PPAP2C	LPP2_HUMAN	17	0.9972	1
Human	Ruch-2	O43688	no	8612	PPAP2C	LPP2_HUMAN	17	0.9969	1
Human	SDM4	O43688	no	8612	PPAP2C	LPP2_HUMAN	17	0.9966	1
Human	SDM5	O43688	no	8612	PPAP2C	LPP2_HUMAN	17	0.9958	1
Human	U-2 OS	O43688	no	8612	PPAP2C	LPP2_HUMAN	17	0.9961	1
Human	U-251 MG	O43688	no	8612	PPAP2C	LPP2_HUMAN	17	0.9954	1
Human	ZL55 MPM	O43688	no	8612	PPAP2C	LPP2_HUMAN	17	0.9975	1
Human	Jurkat (clone E6-1)	O43699	CD327	946	SIGLEC6	SIGL6_HUMAN	3	0.9251	1
Human	Lymphoma	O43699	CD327	946	SIGLEC6	SIGL6_HUMAN	3	0.9928	1
Human	MedB-1	O43699	CD327	946	SIGLEC6	SIGL6_HUMAN	3	0.9931	1
Human	A-431	O43707	no	81	ACTN4	ACTN4_HUMAN	17	1	4
Human	Melanoma Adh	O43707	no	81	ACTN4	ACTN4_HUMAN	17	1	4
Human	RD	O43707	no	81	ACTN4	ACTN4_HUMAN	17	1	4
Human	Ruch-2	O43707	no	81	ACTN4	ACTN4_HUMAN	17	1	4
Human	T98G	O43707	no	81	ACTN4	ACTN4_HUMAN	17	1	3
Human	HeLa	O43707	no	81	ACTN4	ACTN4_HUMAN	17	0.9696	2
Human	Melanoma NSph	O43707	no	81	ACTN4	ACTN4_HUMAN	17	1	2
Human	P493-6	O43707	no	81	ACTN4	ACTN4_HUMAN	17	0.9841	2
Human	SDM4	O43707	no	81	ACTN4	ACTN4_HUMAN	17	1	2
Human	U-87 MG	O43707	no	81	ACTN4	ACTN4_HUMAN	17	1	2
Human	Braintumor	O43707	no	81	ACTN4	ACTN4_HUMAN	17	0.9498	1
Human	CaLu-3	O43707	no	81	ACTN4	ACTN4_HUMAN	17	0.8869	1
Human	L-428	O43707	no	81	ACTN4	ACTN4_HUMAN	17	0.995	1
Human	NK cells	O43707	no	81	ACTN4	ACTN4_HUMAN	17	0.991	1
Human	Rh28	O43707	no	81	ACTN4	ACTN4_HUMAN	17	0.9696	1
Human	SU4 (SU-DHL-4)	O43707	no	81	ACTN4	ACTN4_HUMAN	17	0.9925	1
Human	ZL55 MPM	O43707	no	81	ACTN4	ACTN4_HUMAN	17	0.9481	1
Human	LN-18	O43852	no	813	CALU	CALU_HUMAN	22	1	6
Human	Ruch-2	O43852	no	813	CALU	CALU_HUMAN	22	1	5
Human	T98G	O43852	no	813	CALU	CALU_HUMAN	22	1	5
Human	A-431	O43852	no	813	CALU	CALU_HUMAN	22	1	4
Human	Melanoma NSph	O43852	no	813	CALU	CALU_HUMAN	22	1	4
Human	RD	O43852	no	813	CALU	CALU_HUMAN	22	1	4
Human	U-87 MG	O43852	no	813	CALU	CALU_HUMAN	22	1	4
Human	LN-229	O43852	no	813	CALU	CALU_HUMAN	22	1	3
Human	Melanoma Adh	O43852	no	813	CALU	CALU_HUMAN	22	1	3
Human	Rh28	O43852	no	813	CALU	CALU_HUMAN	22	1	3
Human	HCC4012	O43852	no	813	CALU	CALU_HUMAN	22	1	2
Human	HEK	O43852	no	813	CALU	CALU_HUMAN	22	1	2
Human	NB4	O43852	no	813	CALU	CALU_HUMAN	22	1	2
Human	P493-6	O43852	no	813	CALU	CALU_HUMAN	22	1	2
Human	PASMC	O43852	no	813	CALU	CALU_HUMAN	22	0.9999	2
Human	SDM4	O43852	no	813	CALU	CALU_HUMAN	22	0.9989	2
Human	U-251 MG	O43852	no	813	CALU	CALU_HUMAN	22	0.9999	2
Human	ZL55 MPM	O43852	no	813	CALU	CALU_HUMAN	22	0.9997	2
Human	HeLa	O43852	no	813	CALU	CALU_HUMAN	22	0.992	1
Human	IMR-32	O43852	no	813	CALU	CALU_HUMAN	22	0.9955	1
Human	KM-H2	O43852	no	813	CALU	CALU_HUMAN	22	0.9956	1
Human	MedB-1	O43852	no	813	CALU	CALU_HUMAN	22	0.9931	1
Human	CaLu-3	O43897	no	7092	TLL1	TLL1_HUMAN	3	0.9591	1
Human	Melanoma NSph	O43897	no	7092	TLL1	TLL1_HUMAN	3	0.995	1
Human	U-2 OS	O43897	no	7092	TLL1	TLL1_HUMAN	3	0.9961	1
Human	RD	O43909	no	2137	EXTL3	EXTL3_HUMAN	6	1	2
Human	U-251 MG	O43909	no	2137	EXTL3	EXTL3_HUMAN	6	1	2
Human	HCC4012	O43909	no	2137	EXTL3	EXTL3_HUMAN	6	0.9771	1
Human	HEK	O43909	no	2137	EXTL3	EXTL3_HUMAN	6	0.9941	1
Human	Rh28	O43909	no	2137	EXTL3	EXTL3_HUMAN	6	0.9039	1
Human	Ruch-2	O43909	no	2137	EXTL3	EXTL3_HUMAN	6	0.9271	1
Mouse	159-2 EB	O54732	no	17388	Mmp15	MMP15_MOUSE	13	1	2
Mouse	159-2 ES	O54732	no	17388	Mmp15	MMP15_MOUSE	13	1	2
Mouse	159-2 NP	O54732	no	17388	Mmp15	MMP15_MOUSE	13	1	2
Mouse	J1_EB	O54732	no	17388	Mmp15	MMP15_MOUSE	13	1	2
Mouse	Neural stem cells (forebrain)	O54732	no	17388	Mmp15	MMP15_MOUSE	13	1	2
Mouse	Neural stem cells (spinal cord)	O54732	no	17388	Mmp15	MMP15_MOUSE	13	1	2
Mouse	GL261	O54732	no	17388	Mmp15	MMP15_MOUSE	13	0.8555	1
Mouse	J1_NP	O54732	no	17388	Mmp15	MMP15_MOUSE	13	0.9973	1
Mouse	MSC80	O54732	no	17388	Mmp15	MMP15_MOUSE	13	0.9887	1
Mouse	Neural stem cells (SVZ)	O54732	no	17388	Mmp15	MMP15_MOUSE	13	0.9448	1
Mouse	R1_defNCS 2°	O54732	no	17388	Mmp15	MMP15_MOUSE	13	0.9542	1
Mouse	R1_EB	O54732	no	17388	Mmp15	MMP15_MOUSE	13	0.9936	1
Mouse	R1_primNCS 1°	O54732	no	17388	Mmp15	MMP15_MOUSE	13	0.9446	1
Mouse	2D4-iPS	O54819	no	21788	Tfpi	TFPI1_MOUSE	7	1	2
Mouse	D3_ES	O54819	no	21788	Tfpi	TFPI1_MOUSE	7	1	2
Mouse	R1_primNCS 1°	O54819	no	21788	Tfpi	TFPI1_MOUSE	7	0.9677	2
Mouse	GL261	O54819	no	21788	Tfpi	TFPI1_MOUSE	7	0.9948	1
Mouse	R1_ES	O54819	no	21788	Tfpi	TFPI1_MOUSE	7	0.9927	1
Mouse	SMA560	O54819	no	21788	Tfpi	TFPI1_MOUSE	7	0.921	1
Mouse	TTF-1_iPS	O54819	no	21788	Tfpi	TFPI1_MOUSE	7	0.9955	1
Mouse	TH-0	O54890	CD61	16416	Itgb3	ITB3_MOUSE	5	1	2
Mouse	TH-1	O54890	CD61	16416	Itgb3	ITB3_MOUSE	5	0.9999	2
Mouse	GL261	O54890	CD61	16416	Itgb3	ITB3_MOUSE	5	0.9837	1
Mouse	MSC80	O54890	CD61	16416	Itgb3	ITB3_MOUSE	5	0.9933	1
Mouse	SMA560	O54890	CD61	16416	Itgb3	ITB3_MOUSE	5	0.9905	1
Mouse	TH-17	O54901	CD200	17470	Cd200	OX2G_MOUSE	13	1	7
Mouse	Astroglia	O54901	CD200	17470	Cd200	OX2G_MOUSE	13	1	6
Mouse	TH-1	O54901	CD200	17470	Cd200	OX2G_MOUSE	13	1	5
Mouse	J1_neurons	O54901	CD200	17470	Cd200	OX2G_MOUSE	13	1	4
Mouse	Spleenocytes	O54901	CD200	17470	Cd200	OX2G_MOUSE	13	1	3
Mouse	C2C12	O54901	CD200	17470	Cd200	OX2G_MOUSE	13	1	2
Mouse	GL261	O54901	CD200	17470	Cd200	OX2G_MOUSE	13	1	2
Mouse	Adipocytes subcutaneous	O54901	CD200	17470	Cd200	OX2G_MOUSE	13	0.9955	1
Mouse	Min6	O54901	CD200	17470	Cd200	OX2G_MOUSE	13	0.9941	1
Mouse	Neural stem cells (forebrain)	O54901	CD200	17470	Cd200	OX2G_MOUSE	13	0.9947	1
Mouse	Neural stem cells (spinal cord)	O54901	CD200	17470	Cd200	OX2G_MOUSE	13	0.9972	1
Mouse	Neural stem cells (SVZ)	O54901	CD200	17470	Cd200	OX2G_MOUSE	13	0.9967	1
Mouse	TTF-1_iPS	O54901	CD200	17470	Cd200	OX2G_MOUSE	13	0.9621	1
Mouse	J1_neurons	O54904	no	26877	B3galt1	B3GT1_MOUSE	3	0.9962	1
Mouse	Neural stem cells (spinal cord)	O54904	no	26877	B3galt1	B3GT1_MOUSE	3	0.996	1
Mouse	Neural stem cells (SVZ)	O54904	no	26877	B3galt1	B3GT1_MOUSE	3	0.9953	1
Mouse	Adipocytes subcutaneous	O54905	no	26878	B3galt2	B3GT2_MOUSE	2	0.9863	1
Mouse	Astroglia	O54905	no	26878	B3galt2	B3GT2_MOUSE	2	0.8635	1
Mouse	Neural stem cells (SVZ)	O54965	no	24017	Rnf13	RNF13_MOUSE	7	1	3
Mouse	Neural stem cells (spinal cord)	O54965	no	24017	Rnf13	RNF13_MOUSE	7	1	2
Mouse	D3_ES	O54965	no	24017	Rnf13	RNF13_MOUSE	7	0.9966	1
Mouse	J1_neurons	O54965	no	24017	Rnf13	RNF13_MOUSE	7	0.9926	1
Mouse	R1_defNCS 2°	O54965	no	24017	Rnf13	RNF13_MOUSE	7	0.996	1
Mouse	R1_primNCS 1°	O54965	no	24017	Rnf13	RNF13_MOUSE	7	0.8295	1
Mouse	TTF-1_iPS	O54965	no	24017	Rnf13	RNF13_MOUSE	7	0.9144	1
Mouse	Min6	O54990	CD133	19126	Prom1	PROM1_MOUSE	15	1	25
Mouse	159-2 EB	O54990	CD133	19126	Prom1	PROM1_MOUSE	15	1	9
Mouse	R1_EB	O54990	CD133	19126	Prom1	PROM1_MOUSE	15	1	9
Mouse	159-2 NP	O54990	CD133	19126	Prom1	PROM1_MOUSE	15	1	8
Mouse	J1_EB	O54990	CD133	19126	Prom1	PROM1_MOUSE	15	1	7
Mouse	Astroglia	O54990	CD133	19126	Prom1	PROM1_MOUSE	15	1	6
Mouse	R1_defNCS 2°	O54990	CD133	19126	Prom1	PROM1_MOUSE	15	1	6
Mouse	D3_ES	O54990	CD133	19126	Prom1	PROM1_MOUSE	15	1	5
Mouse	159-2 ES	O54990	CD133	19126	Prom1	PROM1_MOUSE	15	1	4
Mouse	E14Tg2a	O54990	CD133	19126	Prom1	PROM1_MOUSE	15	1	3
Mouse	Neural stem cells (forebrain)	O54990	CD133	19126	Prom1	PROM1_MOUSE	15	1	3
Mouse	R1_ES	O54990	CD133	19126	Prom1	PROM1_MOUSE	15	1	3
Mouse	R1_primNCS 1°	O54990	CD133	19126	Prom1	PROM1_MOUSE	15	1	3
Mouse	J1_neurons	O54990	CD133	19126	Prom1	PROM1_MOUSE	15	0.9973	1
Mouse	TTF-1_iPS	O54990	CD133	19126	Prom1	PROM1_MOUSE	15	0.9955	1
Mouse	Min6	O54991	no	53321	Cntnap1	CNTP1_MOUSE	5	1	11
Mouse	J1_neurons	O54991	no	53321	Cntnap1	CNTP1_MOUSE	5	1	5
Mouse	Neural stem cells (SVZ)	O54991	no	53321	Cntnap1	CNTP1_MOUSE	5	1	3
Mouse	Neural stem cells (spinal cord)	O54991	no	53321	Cntnap1	CNTP1_MOUSE	5	1	2
Mouse	J1_EB	O54991	no	53321	Cntnap1	CNTP1_MOUSE	5	0.9552	1
Mouse	J1_neurons	O55017	no	12287	Cacna1b	CAC1B_MOUSE	1	0.9973	1
Mouse	GL261	O55026	no	12496	Entpd2	ENTP2_MOUSE	18	1	24
Mouse	Astroglia	O55026	no	12496	Entpd2	ENTP2_MOUSE	18	1	12
Mouse	Adipocytes subcutaneous	O55026	no	12496	Entpd2	ENTP2_MOUSE	18	1	4
Mouse	Neural stem cells (spinal cord)	O55026	no	12496	Entpd2	ENTP2_MOUSE	18	1	3
Mouse	E14Tg2a	O55026	no	12496	Entpd2	ENTP2_MOUSE	18	0.9998	2
Mouse	MSC80	O55026	no	12496	Entpd2	ENTP2_MOUSE	18	0.9995	2
Mouse	SMA560	O55026	no	12496	Entpd2	ENTP2_MOUSE	18	0.9982	2
Mouse	TH-0	O55026	no	12496	Entpd2	ENTP2_MOUSE	18	0.988	2
Mouse	159-2 EB	O55026	no	12496	Entpd2	ENTP2_MOUSE	18	0.9885	1
Mouse	159-2 ES	O55026	no	12496	Entpd2	ENTP2_MOUSE	18	0.9905	1
Mouse	159-2 NP	O55026	no	12496	Entpd2	ENTP2_MOUSE	18	0.978	1
Mouse	J1_EB	O55026	no	12496	Entpd2	ENTP2_MOUSE	18	0.9904	1
Mouse	Min6	O55026	no	12496	Entpd2	ENTP2_MOUSE	18	0.9893	1
Mouse	R1_EB	O55026	no	12496	Entpd2	ENTP2_MOUSE	18	0.9885	1
Mouse	R1_ES	O55026	no	12496	Entpd2	ENTP2_MOUSE	18	0.8963	1
Mouse	R1_primNCS 1°	O55026	no	12496	Entpd2	ENTP2_MOUSE	18	0.9962	1
Mouse	Spleenocytes	O55026	no	12496	Entpd2	ENTP2_MOUSE	18	0.8761	1
Mouse	TTF-1_iPS	O55026	no	12496	Entpd2	ENTP2_MOUSE	18	0.969	1
Mouse	E14Tg2a	O55111	no	13511	Dsg2	DSG2_MOUSE	10	1	3
Mouse	159-2 EB	O55111	no	13511	Dsg2	DSG2_MOUSE	10	1	2
Mouse	D3_ES	O55111	no	13511	Dsg2	DSG2_MOUSE	10	1	2
Mouse	R1_EB	O55111	no	13511	Dsg2	DSG2_MOUSE	10	1	2
Mouse	R1_ES	O55111	no	13511	Dsg2	DSG2_MOUSE	10	1	2
Mouse	159-2 ES	O55111	no	13511	Dsg2	DSG2_MOUSE	10	0.9947	1
Mouse	2D4-iPS	O55111	no	13511	Dsg2	DSG2_MOUSE	10	0.9966	1
Mouse	Min6	O55111	no	13511	Dsg2	DSG2_MOUSE	10	0.9941	1
Mouse	R1_primNCS 1°	O55111	no	13511	Dsg2	DSG2_MOUSE	10	0.9979	1
Mouse	TTF-1_iPS	O55111	no	13511	Dsg2	DSG2_MOUSE	10	0.9955	1
Mouse	D3_ES	O55142	no	57808	Rpl35a	RL35A_MOUSE	8	1	3
Mouse	E14Tg2a	O55142	no	57808	Rpl35a	RL35A_MOUSE	8	1	3
Mouse	2D4-iPS	O55142	no	57808	Rpl35a	RL35A_MOUSE	8	1	2
Mouse	J1_EB	O55142	no	57808	Rpl35a	RL35A_MOUSE	8	0.9952	2
Mouse	J774.2	O55142	no	57808	Rpl35a	RL35A_MOUSE	8	1	2
Mouse	159-2 NP	O55142	no	57808	Rpl35a	RL35A_MOUSE	8	0.9797	1
Mouse	Neural stem cells (SVZ)	O55142	no	57808	Rpl35a	RL35A_MOUSE	8	0.9851	1
Mouse	TH-1	O55142	no	57808	Rpl35a	RL35A_MOUSE	8	0.987	1
Mouse	Adipocytes subcutaneous	O55192	no	20538	Slc6a2	SC6A2_MOUSE	4	1	3
Mouse	Astroglia	O55192	no	20538	Slc6a2	SC6A2_MOUSE	4	0.999	2
Mouse	159-2 NP	O55192	no	20538	Slc6a2	SC6A2_MOUSE	4	0.9951	1
Mouse	R1_defNCS 2°	O55192	no	20538	Slc6a2	SC6A2_MOUSE	4	0.996	1
Human	IMR-32	O60243	no	9394	HS6ST1	H6ST1_HUMAN	1	0.9604	1
Human	Rh28	O60245	no	5099	PCDH7	PCDH7_HUMAN	19	1	3
Human	Glioblastoma exvivo	O60245	no	5099	PCDH7	PCDH7_HUMAN	19	0.9939	1
Human	HEK	O60245	no	5099	PCDH7	PCDH7_HUMAN	19	0.9946	1
Human	HeLa	O60245	no	5099	PCDH7	PCDH7_HUMAN	19	0.992	1
Human	LN-18	O60245	no	5099	PCDH7	PCDH7_HUMAN	19	0.9927	1
Human	LN-229	O60245	no	5099	PCDH7	PCDH7_HUMAN	19	0.9977	1
Human	Melanoma Adh	O60245	no	5099	PCDH7	PCDH7_HUMAN	19	0.9915	1
Human	Melanoma NSph	O60245	no	5099	PCDH7	PCDH7_HUMAN	19	0.995	1
Human	P493-6	O60245	no	5099	PCDH7	PCDH7_HUMAN	19	0.9943	1
Human	PASMC	O60245	no	5099	PCDH7	PCDH7_HUMAN	19	0.9908	1
Human	RD	O60245	no	5099	PCDH7	PCDH7_HUMAN	19	0.9972	1
Human	RH4	O60245	no	5099	PCDH7	PCDH7_HUMAN	19	0.9966	1
Human	SDM104	O60245	no	5099	PCDH7	PCDH7_HUMAN	19	0.9942	1
Human	SDM4	O60245	no	5099	PCDH7	PCDH7_HUMAN	19	0.9966	1
Human	SDM5	O60245	no	5099	PCDH7	PCDH7_HUMAN	19	0.9958	1
Human	T98G	O60245	no	5099	PCDH7	PCDH7_HUMAN	19	0.9963	1
Human	U-2 OS	O60245	no	5099	PCDH7	PCDH7_HUMAN	19	0.9961	1
Human	U-251 MG	O60245	no	5099	PCDH7	PCDH7_HUMAN	19	0.9896	1
Human	ZL55 MPM	O60245	no	5099	PCDH7	PCDH7_HUMAN	19	0.9975	1
Human	LN-18	O60266	no	109	ADCY3	ADCY3_HUMAN	16	1	4
Human	HEK	O60266	no	109	ADCY3	ADCY3_HUMAN	16	0.9999	2
Human	L-540	O60266	no	109	ADCY3	ADCY3_HUMAN	16	1	2
Human	Melanoma Adh	O60266	no	109	ADCY3	ADCY3_HUMAN	16	1	2
Human	SU-DHL-6	O60266	no	109	ADCY3	ADCY3_HUMAN	16	1	2
Human	A-431	O60266	no	109	ADCY3	ADCY3_HUMAN	16	0.9935	1
Human	B-All	O60266	no	109	ADCY3	ADCY3_HUMAN	16	0.9923	1
Human	Glioblastoma exvivo	O60266	no	109	ADCY3	ADCY3_HUMAN	16	0.9939	1
Human	HDLM-2	O60266	no	109	ADCY3	ADCY3_HUMAN	16	0.9945	1
Human	IMR-32	O60266	no	109	ADCY3	ADCY3_HUMAN	16	0.9974	1
Human	Jurkat (clone E6-1)	O60266	no	109	ADCY3	ADCY3_HUMAN	16	0.9913	1
Human	L-428	O60266	no	109	ADCY3	ADCY3_HUMAN	16	0.995	1
Human	LN-229	O60266	no	109	ADCY3	ADCY3_HUMAN	16	0.9901	1
Human	RD	O60266	no	109	ADCY3	ADCY3_HUMAN	16	0.9972	1
Human	U-251 MG	O60266	no	109	ADCY3	ADCY3_HUMAN	16	0.9155	1
Human	U2932	O60266	no	109	ADCY3	ADCY3_HUMAN	16	0.9907	1
Human	HEK	O60279	no	26032	SUSD5	SUSD5_HUMAN	7	0.9845	1
Human	LN-229	O60279	no	26032	SUSD5	SUSD5_HUMAN	7	0.9974	1
Human	LNT-229	O60279	no	26032	SUSD5	SUSD5_HUMAN	7	0.9418	1
Human	P493-6	O60279	no	26032	SUSD5	SUSD5_HUMAN	7	0.9937	1
Human	T98G	O60279	no	26032	SUSD5	SUSD5_HUMAN	7	0.996	1
Human	U-2 OS	O60279	no	26032	SUSD5	SUSD5_HUMAN	7	0.8914	1
Human	U-251 MG	O60279	no	26032	SUSD5	SUSD5_HUMAN	7	0.995	1
Human	PASMC	O60330	no	26025	PCDHGA12	PCDGC_HUMAN	2	1	2
Human	Melanoma NSph	O60330	no	26025	PCDHGA12	PCDGC_HUMAN	2	0.995	1
Human	L-428	O60449	CD205	4065	LY75	LY75_HUMAN	26	1	31
Human	MedB-1	O60449	CD205	4065	LY75	LY75_HUMAN	26	1	31
Human	L-540	O60449	CD205	4065	LY75	LY75_HUMAN	26	1	25
Human	KM-H2	O60449	CD205	4065	LY75	LY75_HUMAN	26	1	24
Human	CD4+, CD25- Tcells	O60449	CD205	4065	LY75	LY75_HUMAN	26	1	20
Human	SU4 (SU-DHL-4)	O60449	CD205	4065	LY75	LY75_HUMAN	26	1	17
Human	HDLM-2	O60449	CD205	4065	LY75	LY75_HUMAN	26	1	16
Human	NK cells	O60449	CD205	4065	LY75	LY75_HUMAN	26	1	15
Human	B-All	O60449	CD205	4065	LY75	LY75_HUMAN	26	1	14
Human	NB4	O60449	CD205	4065	LY75	LY75_HUMAN	26	1	13
Human	U2932	O60449	CD205	4065	LY75	LY75_HUMAN	26	1	13
Human	A-431	O60449	CD205	4065	LY75	LY75_HUMAN	26	1	10
Human	HBL-1	O60449	CD205	4065	LY75	LY75_HUMAN	26	1	10
Human	Lymphoma	O60449	CD205	4065	LY75	LY75_HUMAN	26	1	10
Human	SDM5	O60449	CD205	4065	LY75	LY75_HUMAN	26	1	8
Human	SU-DHL-6	O60449	CD205	4065	LY75	LY75_HUMAN	26	1	8
Human	CaLu-3	O60449	CD205	4065	LY75	LY75_HUMAN	26	1	7
Human	Melanoma NSph	O60449	CD205	4065	LY75	LY75_HUMAN	26	1	7
Human	Glioblastoma exvivo	O60449	CD205	4065	LY75	LY75_HUMAN	26	1	5
Human	ZL55 MPM	O60449	CD205	4065	LY75	LY75_HUMAN	26	1	5
Human	HL-60	O60449	CD205	4065	LY75	LY75_HUMAN	26	1	3
Human	LN-18	O60449	CD205	4065	LY75	LY75_HUMAN	26	1	2
Human	Melanoma Adh	O60449	CD205	4065	LY75	LY75_HUMAN	26	1	2
Human	P493-6	O60449	CD205	4065	LY75	LY75_HUMAN	26	1	2
Human	hMSC	O60449	CD205	4065	LY75	LY75_HUMAN	26	0.952	1
Human	PASMC	O60449	CD205	4065	LY75	LY75_HUMAN	26	0.9235	1
Human	KM-H2	O60462	no	8828	NRP2	NRP2_HUMAN	18	1	32
Human	L-428	O60462	no	8828	NRP2	NRP2_HUMAN	18	1	8
Human	U-251 MG	O60462	no	8828	NRP2	NRP2_HUMAN	18	1	7
Human	U-87 MG	O60462	no	8828	NRP2	NRP2_HUMAN	18	1	3
Human	B-All	O60462	no	8828	NRP2	NRP2_HUMAN	18	1	2
Human	Glioblastoma exvivo	O60462	no	8828	NRP2	NRP2_HUMAN	18	0.9999	2
Human	Melanoma Adh	O60462	no	8828	NRP2	NRP2_HUMAN	18	0.9999	2
Human	Melanoma NSph	O60462	no	8828	NRP2	NRP2_HUMAN	18	0.9999	2
Human	P493-6	O60462	no	8828	NRP2	NRP2_HUMAN	18	1	2
Human	SU-DHL-6	O60462	no	8828	NRP2	NRP2_HUMAN	18	0.9853	2
Human	786-O	O60462	no	8828	NRP2	NRP2_HUMAN	18	0.9957	1
Human	A-431	O60462	no	8828	NRP2	NRP2_HUMAN	18	0.9935	1
Human	LN-229	O60462	no	8828	NRP2	NRP2_HUMAN	18	0.9138	1
Human	LNT-229	O60462	no	8828	NRP2	NRP2_HUMAN	18	0.9944	1
Human	PASMC	O60462	no	8828	NRP2	NRP2_HUMAN	18	0.9908	1
Human	RD	O60462	no	8828	NRP2	NRP2_HUMAN	18	0.9972	1
Human	Rh28	O60462	no	8828	NRP2	NRP2_HUMAN	18	0.9968	1
Human	SDM104	O60462	no	8828	NRP2	NRP2_HUMAN	18	0.9942	1
Human	Melanoma NSph	O60486	CD232	10154	PLXNC1	PLXC1_HUMAN	14	1	26
Human	Melanoma Adh	O60486	CD232	10154	PLXNC1	PLXC1_HUMAN	14	1	17
Human	HDLM-2	O60486	CD232	10154	PLXNC1	PLXC1_HUMAN	14	1	12
Human	SU4 (SU-DHL-4)	O60486	CD232	10154	PLXNC1	PLXC1_HUMAN	14	1	11
Human	L-428	O60486	CD232	10154	PLXNC1	PLXC1_HUMAN	14	1	9
Human	MedB-1	O60486	CD232	10154	PLXNC1	PLXC1_HUMAN	14	1	9
Human	SU-DHL-6	O60486	CD232	10154	PLXNC1	PLXC1_HUMAN	14	1	7
Human	B-All	O60486	CD232	10154	PLXNC1	PLXC1_HUMAN	14	1	5
Human	IMR-32	O60486	CD232	10154	PLXNC1	PLXC1_HUMAN	14	1	4
Human	CD4+, CD25- Tcells	O60486	CD232	10154	PLXNC1	PLXC1_HUMAN	14	1	3
Human	KM-H2	O60486	CD232	10154	PLXNC1	PLXC1_HUMAN	14	1	3
Human	NK cells	O60486	CD232	10154	PLXNC1	PLXC1_HUMAN	14	1	2
Human	HL-60	O60486	CD232	10154	PLXNC1	PLXC1_HUMAN	14	0.9504	1
Human	Lymphoma	O60486	CD232	10154	PLXNC1	PLXC1_HUMAN	14	0.9978	1
Human	HeLa	O60487	no	10205	MPZL2	MPZL2_HUMAN	11	1	2
Human	A-431	O60487	no	10205	MPZL2	MPZL2_HUMAN	11	0.9935	1
Human	Adipocytes	O60487	no	10205	MPZL2	MPZL2_HUMAN	11	0.9941	1
Human	CaLu-3	O60487	no	10205	MPZL2	MPZL2_HUMAN	11	0.9961	1
Human	CD4+, CD25- Tcells	O60487	no	10205	MPZL2	MPZL2_HUMAN	11	0.9923	1
Human	HBL-1	O60487	no	10205	MPZL2	MPZL2_HUMAN	11	0.9924	1
Human	HEK	O60487	no	10205	MPZL2	MPZL2_HUMAN	11	0.9946	1
Human	LN-18	O60487	no	10205	MPZL2	MPZL2_HUMAN	11	0.9927	1
Human	LN-229	O60487	no	10205	MPZL2	MPZL2_HUMAN	11	0.9977	1
Human	U2932	O60487	no	10205	MPZL2	MPZL2_HUMAN	11	0.9907	1
Human	ZL55 MPM	O60487	no	10205	MPZL2	MPZL2_HUMAN	11	0.9975	1
Human	HL-60	O60503	no	115	ADCY9	ADCY9_HUMAN	37	1	4
Human	L-540	O60503	no	115	ADCY9	ADCY9_HUMAN	37	1	3
Human	LN-18	O60503	no	115	ADCY9	ADCY9_HUMAN	37	1	3
Human	U-251 MG	O60503	no	115	ADCY9	ADCY9_HUMAN	37	1	3
Human	A-431	O60503	no	115	ADCY9	ADCY9_HUMAN	37	1	2
Human	B-All	O60503	no	115	ADCY9	ADCY9_HUMAN	37	1	2
Human	Glioblastoma exvivo	O60503	no	115	ADCY9	ADCY9_HUMAN	37	1	2
Human	HBL-1	O60503	no	115	ADCY9	ADCY9_HUMAN	37	1	2
Human	HDLM-2	O60503	no	115	ADCY9	ADCY9_HUMAN	37	1	2
Human	HEK	O60503	no	115	ADCY9	ADCY9_HUMAN	37	1	2
Human	hMSC	O60503	no	115	ADCY9	ADCY9_HUMAN	37	1	2
Human	L-428	O60503	no	115	ADCY9	ADCY9_HUMAN	37	1	2
Human	LN-229	O60503	no	115	ADCY9	ADCY9_HUMAN	37	1	2
Human	LNT-229	O60503	no	115	ADCY9	ADCY9_HUMAN	37	1	2
Human	NB4	O60503	no	115	ADCY9	ADCY9_HUMAN	37	1	2
Human	NK cells	O60503	no	115	ADCY9	ADCY9_HUMAN	37	1	2
Human	P493-6	O60503	no	115	ADCY9	ADCY9_HUMAN	37	1	2
Human	PASMC	O60503	no	115	ADCY9	ADCY9_HUMAN	37	1	2
Human	RH4	O60503	no	115	ADCY9	ADCY9_HUMAN	37	1	2
Human	SDM4	O60503	no	115	ADCY9	ADCY9_HUMAN	37	1	2
Human	SDM5	O60503	no	115	ADCY9	ADCY9_HUMAN	37	1	2
Human	T98G	O60503	no	115	ADCY9	ADCY9_HUMAN	37	1	2
Human	U-2 OS	O60503	no	115	ADCY9	ADCY9_HUMAN	37	0.9999	2
Human	U-87 MG	O60503	no	115	ADCY9	ADCY9_HUMAN	37	1	2
Human	U2932	O60503	no	115	ADCY9	ADCY9_HUMAN	37	1	2
Human	ZL55 MPM	O60503	no	115	ADCY9	ADCY9_HUMAN	37	0.9999	2
Human	786-O	O60503	no	115	ADCY9	ADCY9_HUMAN	37	0.9525	1
Human	Adipocytes	O60503	no	115	ADCY9	ADCY9_HUMAN	37	0.8956	1
Human	CaLu-3	O60503	no	115	ADCY9	ADCY9_HUMAN	37	0.9542	1
Human	CD4+, CD25- Tcells	O60503	no	115	ADCY9	ADCY9_HUMAN	37	0.9923	1
Human	HCC4012	O60503	no	115	ADCY9	ADCY9_HUMAN	37	0.9793	1
Human	HeLa	O60503	no	115	ADCY9	ADCY9_HUMAN	37	0.9191	1
Human	IMR-32	O60503	no	115	ADCY9	ADCY9_HUMAN	37	0.9871	1
Human	Melanoma Adh	O60503	no	115	ADCY9	ADCY9_HUMAN	37	0.9436	1
Human	Melanoma NSph	O60503	no	115	ADCY9	ADCY9_HUMAN	37	0.9945	1
Human	RD	O60503	no	115	ADCY9	ADCY9_HUMAN	37	0.9972	1
Human	SDM104	O60503	no	115	ADCY9	ADCY9_HUMAN	37	0.993	1
Human	U-251 MG	O60512	no	8703	B4GALT3	B4GT3_HUMAN	11	1	10
Human	HEK	O60512	no	8703	B4GALT3	B4GT3_HUMAN	11	1	2
Human	Melanoma NSph	O60512	no	8703	B4GALT3	B4GT3_HUMAN	11	1	2
Human	RD	O60512	no	8703	B4GALT3	B4GT3_HUMAN	11	1	2
Human	IMR-32	O60512	no	8703	B4GALT3	B4GT3_HUMAN	11	0.9955	1
Human	LN-18	O60512	no	8703	B4GALT3	B4GT3_HUMAN	11	0.992	1
Human	LN-229	O60512	no	8703	B4GALT3	B4GT3_HUMAN	11	0.9974	1
Human	Rh28	O60512	no	8703	B4GALT3	B4GT3_HUMAN	11	0.9968	1
Human	SDM4	O60512	no	8703	B4GALT3	B4GT3_HUMAN	11	0.8979	1
Human	T98G	O60512	no	8703	B4GALT3	B4GT3_HUMAN	11	0.996	1
Human	U-87 MG	O60512	no	8703	B4GALT3	B4GT3_HUMAN	11	0.9943	1
Human	Glioblastoma exvivo	O60565	no	26585	GREM1	GREM1_HUMAN	2	0.9939	1
Human	SDM104	O60565	no	26585	GREM1	GREM1_HUMAN	2	0.9942	1
Human	U-2 OS	O60568	no	8985	PLOD3	PLOD3_HUMAN	24	1	5
Human	U-251 MG	O60568	no	8985	PLOD3	PLOD3_HUMAN	24	1	5
Human	HeLa	O60568	no	8985	PLOD3	PLOD3_HUMAN	24	1	3
Human	IMR-32	O60568	no	8985	PLOD3	PLOD3_HUMAN	24	1	3
Human	RD	O60568	no	8985	PLOD3	PLOD3_HUMAN	24	1	3
Human	Rh28	O60568	no	8985	PLOD3	PLOD3_HUMAN	24	1	3
Human	Glioblastoma exvivo	O60568	no	8985	PLOD3	PLOD3_HUMAN	24	1	2
Human	HCC4012	O60568	no	8985	PLOD3	PLOD3_HUMAN	24	1	2
Human	HEK	O60568	no	8985	PLOD3	PLOD3_HUMAN	24	1	2
Human	Melanoma Adh	O60568	no	8985	PLOD3	PLOD3_HUMAN	24	1	2
Human	Melanoma NSph	O60568	no	8985	PLOD3	PLOD3_HUMAN	24	1	2
Human	Ruch-2	O60568	no	8985	PLOD3	PLOD3_HUMAN	24	1	2
Human	SDM34	O60568	no	8985	PLOD3	PLOD3_HUMAN	24	1	2
Human	U-87 MG	O60568	no	8985	PLOD3	PLOD3_HUMAN	24	1	2
Human	ZL55 MPM	O60568	no	8985	PLOD3	PLOD3_HUMAN	24	1	2
Human	A-431	O60568	no	8985	PLOD3	PLOD3_HUMAN	24	0.8878	1
Human	Adipocytes	O60568	no	8985	PLOD3	PLOD3_HUMAN	24	0.993	1
Human	CaLu-3	O60568	no	8985	PLOD3	PLOD3_HUMAN	24	0.9199	1
Human	LN-229	O60568	no	8985	PLOD3	PLOD3_HUMAN	24	0.9972	1
Human	LNT-229	O60568	no	8985	PLOD3	PLOD3_HUMAN	24	0.831	1
Human	SDM104	O60568	no	8985	PLOD3	PLOD3_HUMAN	24	0.993	1
Human	SDM4	O60568	no	8985	PLOD3	PLOD3_HUMAN	24	0.9929	1
Human	SDM5	O60568	no	8985	PLOD3	PLOD3_HUMAN	24	0.8919	1
Human	T98G	O60568	no	8985	PLOD3	PLOD3_HUMAN	24	0.9956	1
Human	B-All	O60603	CD282	7097	TLR2	TLR2_HUMAN	7	1	3
Human	HL-60	O60603	CD282	7097	TLR2	TLR2_HUMAN	7	1	3
Human	L-428	O60603	CD282	7097	TLR2	TLR2_HUMAN	7	1	2
Human	NB4	O60603	CD282	7097	TLR2	TLR2_HUMAN	7	1	2
Human	Melanoma NSph	O60603	CD282	7097	TLR2	TLR2_HUMAN	7	0.993	1
Human	SDM4	O60603	CD282	7097	TLR2	TLR2_HUMAN	7	0.9814	1
Human	SDM5	O60603	CD282	7097	TLR2	TLR2_HUMAN	7	0.9899	1
Human	A-431	O60635	no	10103	TSPAN1	TSN1_HUMAN	1	0.9935	1
Human	A-431	O60636	no	10100	TSPAN2	TSN2_HUMAN	3	0.9785	1
Human	Jurkat (clone E6-1)	O60636	no	10100	TSPAN2	TSN2_HUMAN	3	0.9913	1
Human	NK cells	O60636	no	10100	TSPAN2	TSN2_HUMAN	3	0.9757	1
Human	IMR-32	O60637	no	10099	TSPAN3	TSN3_HUMAN	40	1	8
Human	U-251 MG	O60637	no	10099	TSPAN3	TSN3_HUMAN	40	1	7
Human	Melanoma NSph	O60637	no	10099	TSPAN3	TSN3_HUMAN	40	1	6
Human	Rh28	O60637	no	10099	TSPAN3	TSN3_HUMAN	40	1	6
Human	HEK	O60637	no	10099	TSPAN3	TSN3_HUMAN	40	1	5
Human	Melanoma Adh	O60637	no	10099	TSPAN3	TSN3_HUMAN	40	1	4
Human	HeLa	O60637	no	10099	TSPAN3	TSN3_HUMAN	40	1	3
Human	LN-18	O60637	no	10099	TSPAN3	TSN3_HUMAN	40	1	3
Human	MedB-1	O60637	no	10099	TSPAN3	TSN3_HUMAN	40	1	3
Human	PASMC	O60637	no	10099	TSPAN3	TSN3_HUMAN	40	1	3
Human	RD	O60637	no	10099	TSPAN3	TSN3_HUMAN	40	1	3
Human	Ruch-2	O60637	no	10099	TSPAN3	TSN3_HUMAN	40	1	3
Human	HCC4012	O60637	no	10099	TSPAN3	TSN3_HUMAN	40	1	2
Human	LN-229	O60637	no	10099	TSPAN3	TSN3_HUMAN	40	1	2
Human	NB4	O60637	no	10099	TSPAN3	TSN3_HUMAN	40	1	2
Human	SU-DHL-6	O60637	no	10099	TSPAN3	TSN3_HUMAN	40	1	2
Human	U-87 MG	O60637	no	10099	TSPAN3	TSN3_HUMAN	40	1	2
Human	U2932	O60637	no	10099	TSPAN3	TSN3_HUMAN	40	1	2
Human	A-431	O60637	no	10099	TSPAN3	TSN3_HUMAN	40	0.9935	1
Human	Adipocytes	O60637	no	10099	TSPAN3	TSN3_HUMAN	40	0.9702	1
Human	B-All	O60637	no	10099	TSPAN3	TSN3_HUMAN	40	0.9923	1
Human	CaLu-3	O60637	no	10099	TSPAN3	TSN3_HUMAN	40	0.9939	1
Human	Glioblastoma exvivo	O60637	no	10099	TSPAN3	TSN3_HUMAN	40	0.9939	1
Human	HBL-1	O60637	no	10099	TSPAN3	TSN3_HUMAN	40	0.9936	1
Human	HDLM-2	O60637	no	10099	TSPAN3	TSN3_HUMAN	40	0.9945	1
Human	HL-60	O60637	no	10099	TSPAN3	TSN3_HUMAN	40	0.9861	1
Human	Jurkat (clone E6-1)	O60637	no	10099	TSPAN3	TSN3_HUMAN	40	0.9913	1
Human	KM-H2	O60637	no	10099	TSPAN3	TSN3_HUMAN	40	0.9956	1
Human	L-428	O60637	no	10099	TSPAN3	TSN3_HUMAN	40	0.995	1
Human	L-540	O60637	no	10099	TSPAN3	TSN3_HUMAN	40	0.9921	1
Human	P493-6	O60637	no	10099	TSPAN3	TSN3_HUMAN	40	0.9943	1
Human	RH4	O60637	no	10099	TSPAN3	TSN3_HUMAN	40	0.9966	1
Human	SDM104	O60637	no	10099	TSPAN3	TSN3_HUMAN	40	0.9942	1
Human	SDM34	O60637	no	10099	TSPAN3	TSN3_HUMAN	40	0.9979	1
Human	SDM4	O60637	no	10099	TSPAN3	TSN3_HUMAN	40	0.9885	1
Human	SDM5	O60637	no	10099	TSPAN3	TSN3_HUMAN	40	0.9958	1
Human	SU4 (SU-DHL-4)	O60637	no	10099	TSPAN3	TSN3_HUMAN	40	0.9925	1
Human	T98G	O60637	no	10099	TSPAN3	TSN3_HUMAN	40	0.9963	1
Human	U-2 OS	O60637	no	10099	TSPAN3	TSN3_HUMAN	40	0.9961	1
Human	ZL55 MPM	O60637	no	10099	TSPAN3	TSN3_HUMAN	40	0.9975	1
Human	ZL55 MPM	O60656	no	54600	UGT1A9	UD19_HUMAN	3	1	2
Human	LN-18	O60656	no	54600	UGT1A9	UD19_HUMAN	3	0.9927	1
Human	LN-229	O60656	no	54600	UGT1A9	UD19_HUMAN	3	0.9977	1
Human	HEK	O60779	no	10560	SLC19A2	S19A2_HUMAN	28	1	4
Human	IMR-32	O60779	no	10560	SLC19A2	S19A2_HUMAN	28	1	4
Human	NB4	O60779	no	10560	SLC19A2	S19A2_HUMAN	28	1	4
Human	HeLa	O60779	no	10560	SLC19A2	S19A2_HUMAN	28	1	3
Human	HL-60	O60779	no	10560	SLC19A2	S19A2_HUMAN	28	0.9911	3
Human	Melanoma NSph	O60779	no	10560	SLC19A2	S19A2_HUMAN	28	1	3
Human	SDM104	O60779	no	10560	SLC19A2	S19A2_HUMAN	28	1	3
Human	SDM5	O60779	no	10560	SLC19A2	S19A2_HUMAN	28	0.9999	3
Human	U-251 MG	O60779	no	10560	SLC19A2	S19A2_HUMAN	28	1	3
Human	A-431	O60779	no	10560	SLC19A2	S19A2_HUMAN	28	0.9995	2
Human	CaLu-3	O60779	no	10560	SLC19A2	S19A2_HUMAN	28	0.9999	2
Human	Glioblastoma exvivo	O60779	no	10560	SLC19A2	S19A2_HUMAN	28	0.9999	2
Human	Jurkat (clone E6-1)	O60779	no	10560	SLC19A2	S19A2_HUMAN	28	0.9997	2
Human	L-428	O60779	no	10560	SLC19A2	S19A2_HUMAN	28	1	2
Human	L-540	O60779	no	10560	SLC19A2	S19A2_HUMAN	28	1	2
Human	LN-18	O60779	no	10560	SLC19A2	S19A2_HUMAN	28	0.9999	2
Human	Melanoma Adh	O60779	no	10560	SLC19A2	S19A2_HUMAN	28	1	2
Human	U2932	O60779	no	10560	SLC19A2	S19A2_HUMAN	28	0.9999	2
Human	B-All	O60779	no	10560	SLC19A2	S19A2_HUMAN	28	0.9803	1
Human	HBL-1	O60779	no	10560	SLC19A2	S19A2_HUMAN	28	0.9363	1
Human	HDLM-2	O60779	no	10560	SLC19A2	S19A2_HUMAN	28	0.978	1
Human	KM-H2	O60779	no	10560	SLC19A2	S19A2_HUMAN	28	0.9469	1
Human	MedB-1	O60779	no	10560	SLC19A2	S19A2_HUMAN	28	0.9897	1
Human	RD	O60779	no	10560	SLC19A2	S19A2_HUMAN	28	0.8158	1
Human	Rh28	O60779	no	10560	SLC19A2	S19A2_HUMAN	28	0.9962	1
Human	SU-DHL-6	O60779	no	10560	SLC19A2	S19A2_HUMAN	28	0.8484	1
Human	U-2 OS	O60779	no	10560	SLC19A2	S19A2_HUMAN	28	0.9953	1
Human	ZL55 MPM	O60779	no	10560	SLC19A2	S19A2_HUMAN	28	0.997	1
Human	Adipocytes	O60896	no	10268	RAMP3	RAMP3_HUMAN	1	0.993	1
Human	Rh28	O60911	no	1515	CTSL2	CATL2_HUMAN	1	0.9968	1
Human	L-428	O60931	no	1497	CTNS	CTNS_HUMAN	7	1	2
Human	HDLM-2	O60931	no	1497	CTNS	CTNS_HUMAN	7	0.9945	1
Human	KM-H2	O60931	no	1497	CTNS	CTNS_HUMAN	7	0.9956	1
Human	L-540	O60931	no	1497	CTNS	CTNS_HUMAN	7	0.9921	1
Human	MedB-1	O60931	no	1497	CTNS	CTNS_HUMAN	7	0.9931	1
Human	SU-DHL-6	O60931	no	1497	CTNS	CTNS_HUMAN	7	0.9895	1
Human	U2932	O60931	no	1497	CTNS	CTNS_HUMAN	7	0.9907	1
Human	U-2 OS	O60939	no	6327	SCN2B	SCN2B_HUMAN	1	1	2
Mouse	J1_neurons	O70174	no	11438	Chrna4	ACHA4_MOUSE	3	1	2
Mouse	Neural stem cells (SVZ)	O70174	no	11438	Chrna4	ACHA4_MOUSE	3	0.9967	1
Mouse	R1_defNCS 2°	O70174	no	11438	Chrna4	ACHA4_MOUSE	3	0.996	1
Mouse	D3_ES	O70255	no	14012	Mpzl2	MPZL2_MOUSE	6	1	3
Mouse	E14Tg2a	O70255	no	14012	Mpzl2	MPZL2_MOUSE	6	1	3
Mouse	R1_ES	O70255	no	14012	Mpzl2	MPZL2_MOUSE	6	1	2
Mouse	159-2 ES	O70255	no	14012	Mpzl2	MPZL2_MOUSE	6	0.9947	1
Mouse	R1_primNCS 1°	O70255	no	14012	Mpzl2	MPZL2_MOUSE	6	0.9979	1
Mouse	TH-1	O70255	no	14012	Mpzl2	MPZL2_MOUSE	6	0.9215	1
Mouse	MSC80	O70258	no	20392	Sgce	SGCE_MOUSE	7	1	2
Mouse	Astroglia	O70258	no	20392	Sgce	SGCE_MOUSE	7	0.9941	1
Mouse	GL261	O70258	no	20392	Sgce	SGCE_MOUSE	7	0.9957	1
Mouse	J1_EB	O70258	no	20392	Sgce	SGCE_MOUSE	7	0.9948	1
Mouse	J1_neurons	O70258	no	20392	Sgce	SGCE_MOUSE	7	0.9973	1
Mouse	Neural stem cells (spinal cord)	O70258	no	20392	Sgce	SGCE_MOUSE	7	0.9972	1
Mouse	Neural stem cells (SVZ)	O70258	no	20392	Sgce	SGCE_MOUSE	7	0.9967	1
Mouse	Min6	O70309	no	16419	Itgb5	ITB5_MOUSE	12	1	9
Mouse	Astroglia	O70309	no	16419	Itgb5	ITB5_MOUSE	12	1	5
Mouse	Neural stem cells (spinal cord)	O70309	no	16419	Itgb5	ITB5_MOUSE	12	1	5
Mouse	MSC80	O70309	no	16419	Itgb5	ITB5_MOUSE	12	1	4
Mouse	GL261	O70309	no	16419	Itgb5	ITB5_MOUSE	12	1	3
Mouse	Neural stem cells (forebrain)	O70309	no	16419	Itgb5	ITB5_MOUSE	12	1	3
Mouse	D3_ES	O70309	no	16419	Itgb5	ITB5_MOUSE	12	0.9999	2
Mouse	R1_primNCS 1°	O70309	no	16419	Itgb5	ITB5_MOUSE	12	0.9902	2
Mouse	2D4-iPS	O70309	no	16419	Itgb5	ITB5_MOUSE	12	0.9936	1
Mouse	J1_EB	O70309	no	16419	Itgb5	ITB5_MOUSE	12	0.9971	1
Mouse	R1_ES	O70309	no	16419	Itgb5	ITB5_MOUSE	12	0.9784	1
Mouse	SMA560	O70309	no	16419	Itgb5	ITB5_MOUSE	12	0.9913	1
Mouse	J1_neurons	O70340	no	53324	Nptx2	NPTX2_MOUSE	7	1	2
Mouse	R1_ES	O70340	no	53324	Nptx2	NPTX2_MOUSE	7	0.9996	2
Mouse	R1_primNCS 1°	O70340	no	53324	Nptx2	NPTX2_MOUSE	7	1	2
Mouse	159-2 ES	O70340	no	53324	Nptx2	NPTX2_MOUSE	7	0.9786	1
Mouse	D3_ES	O70340	no	53324	Nptx2	NPTX2_MOUSE	7	0.9742	1
Mouse	R1_defNCS 2°	O70340	no	53324	Nptx2	NPTX2_MOUSE	7	0.996	1
Mouse	TTF-1_iPS	O70340	no	53324	Nptx2	NPTX2_MOUSE	7	0.9955	1
Mouse	Spleenocytes	O70394	no	50931	Il27ra	I27RA_MOUSE	4	0.9945	1
Mouse	TH-0	O70394	no	50931	Il27ra	I27RA_MOUSE	4	0.9946	1
Mouse	TH-1	O70394	no	50931	Il27ra	I27RA_MOUSE	4	0.9953	1
Mouse	TH-17	O70394	no	50931	Il27ra	I27RA_MOUSE	4	0.9944	1
Mouse	J1_EB	O70401	no	56496	Tspan6	TSN6_MOUSE	22	1	4
Mouse	159-2 EB	O70401	no	56496	Tspan6	TSN6_MOUSE	22	1	3
Mouse	159-2 ES	O70401	no	56496	Tspan6	TSN6_MOUSE	22	1	3
Mouse	159-2 NP	O70401	no	56496	Tspan6	TSN6_MOUSE	22	1	3
Mouse	R1_EB	O70401	no	56496	Tspan6	TSN6_MOUSE	22	1	3
Mouse	Neural stem cells (spinal cord)	O70401	no	56496	Tspan6	TSN6_MOUSE	22	0.9995	2
Mouse	Neural stem cells (SVZ)	O70401	no	56496	Tspan6	TSN6_MOUSE	22	1	2
Mouse	R1_defNCS 2°	O70401	no	56496	Tspan6	TSN6_MOUSE	22	0.9997	2
Mouse	2D4-iPS	O70401	no	56496	Tspan6	TSN6_MOUSE	22	0.9966	1
Mouse	Adipocytes subcutaneous	O70401	no	56496	Tspan6	TSN6_MOUSE	22	0.9943	1
Mouse	Astroglia	O70401	no	56496	Tspan6	TSN6_MOUSE	22	0.9941	1
Mouse	D3_ES	O70401	no	56496	Tspan6	TSN6_MOUSE	22	0.9966	1
Mouse	E14Tg2a	O70401	no	56496	Tspan6	TSN6_MOUSE	22	0.986	1
Mouse	GL261	O70401	no	56496	Tspan6	TSN6_MOUSE	22	0.9846	1
Mouse	J1_neurons	O70401	no	56496	Tspan6	TSN6_MOUSE	22	0.9973	1
Mouse	Min6	O70401	no	56496	Tspan6	TSN6_MOUSE	22	0.9941	1
Mouse	Neural stem cells (forebrain)	O70401	no	56496	Tspan6	TSN6_MOUSE	22	0.9947	1
Mouse	R1_ES	O70401	no	56496	Tspan6	TSN6_MOUSE	22	0.9927	1
Mouse	R1_primNCS 1°	O70401	no	56496	Tspan6	TSN6_MOUSE	22	0.9576	1
Mouse	TH-1	O70401	no	56496	Tspan6	TSN6_MOUSE	22	0.9953	1
Mouse	TH-17	O70401	no	56496	Tspan6	TSN6_MOUSE	22	0.9906	1
Mouse	TTF-1_iPS	O70401	no	56496	Tspan6	TSN6_MOUSE	22	0.9955	1
Mouse	Adipocytes subcutaneous	O70423	no	11754	Aoc3	AOC3_MOUSE	2	1	12
Mouse	D3_ES	O70423	no	11754	Aoc3	AOC3_MOUSE	2	0.8814	1
Mouse	GL261	O70458	no	18414	Osmr	OSMR_MOUSE	10	1	25
Mouse	Astroglia	O70458	no	18414	Osmr	OSMR_MOUSE	10	1	24
Mouse	Neural stem cells (spinal cord)	O70458	no	18414	Osmr	OSMR_MOUSE	10	1	6
Mouse	R1_ES	O70458	no	18414	Osmr	OSMR_MOUSE	10	1	5
Mouse	D3_ES	O70458	no	18414	Osmr	OSMR_MOUSE	10	1	4
Mouse	2D4-iPS	O70458	no	18414	Osmr	OSMR_MOUSE	10	1	3
Mouse	C2C12	O70458	no	18414	Osmr	OSMR_MOUSE	10	1	3
Mouse	SMA560	O70458	no	18414	Osmr	OSMR_MOUSE	10	1	3
Mouse	TTF-1_iPS	O70458	no	18414	Osmr	OSMR_MOUSE	10	1	3
Mouse	R1_primNCS 1°	O70458	no	18414	Osmr	OSMR_MOUSE	10	0.9979	1
Mouse	R1_primNCS 1°	O70472	no	56030	Tmem131	TM131_MOUSE	5	1	3
Mouse	J1_EB	O70472	no	56030	Tmem131	TM131_MOUSE	5	0.9991	2
Mouse	J1_neurons	O70472	no	56030	Tmem131	TM131_MOUSE	5	0.9549	1
Mouse	Neural stem cells (SVZ)	O70472	no	56030	Tmem131	TM131_MOUSE	5	0.996	1
Mouse	R1_defNCS 2°	O70472	no	56030	Tmem131	TM131_MOUSE	5	0.9952	1
Human	NK cells	O75015	CD16b	2215	FCGR3B	FCG3B_HUMAN	2	1	5
Human	B-All	O75015	CD16b	2215	FCGR3B	FCG3B_HUMAN	2	0.9997	2
Human	NK cells	O75019	CD85i	11024	LILRA1	LIRA1_HUMAN	1	1	2
Human	HEK	O75051	no	5362	PLXNA2	PLXA2_HUMAN	5	0.9935	1
Human	RD	O75051	no	5362	PLXNA2	PLXA2_HUMAN	5	0.9972	1
Human	Rh28	O75051	no	5362	PLXNA2	PLXA2_HUMAN	5	0.9968	1
Human	SDM4	O75051	no	5362	PLXNA2	PLXA2_HUMAN	5	0.9728	1
Human	U-251 MG	O75051	no	5362	PLXNA2	PLXA2_HUMAN	5	0.9954	1
Human	Melanoma Adh	O75054	no	3321	IGSF3	IGSF3_HUMAN	24	1	23
Human	Melanoma NSph	O75054	no	3321	IGSF3	IGSF3_HUMAN	24	1	17
Human	U-251 MG	O75054	no	3321	IGSF3	IGSF3_HUMAN	24	1	15
Human	A-431	O75054	no	3321	IGSF3	IGSF3_HUMAN	24	1	14
Human	HDLM-2	O75054	no	3321	IGSF3	IGSF3_HUMAN	24	1	13
Human	IMR-32	O75054	no	3321	IGSF3	IGSF3_HUMAN	24	1	11
Human	B-All	O75054	no	3321	IGSF3	IGSF3_HUMAN	24	1	10
Human	MedB-1	O75054	no	3321	IGSF3	IGSF3_HUMAN	24	1	10
Human	L-428	O75054	no	3321	IGSF3	IGSF3_HUMAN	24	1	9
Human	U-87 MG	O75054	no	3321	IGSF3	IGSF3_HUMAN	24	1	8
Human	HEK	O75054	no	3321	IGSF3	IGSF3_HUMAN	24	1	5
Human	HeLa	O75054	no	3321	IGSF3	IGSF3_HUMAN	24	1	4
Human	KM-H2	O75054	no	3321	IGSF3	IGSF3_HUMAN	24	1	4
Human	U-2 OS	O75054	no	3321	IGSF3	IGSF3_HUMAN	24	1	4
Human	LN-18	O75054	no	3321	IGSF3	IGSF3_HUMAN	24	1	3
Human	LNT-229	O75054	no	3321	IGSF3	IGSF3_HUMAN	24	1	3
Human	P493-6	O75054	no	3321	IGSF3	IGSF3_HUMAN	24	1	3
Human	T98G	O75054	no	3321	IGSF3	IGSF3_HUMAN	24	1	2
Human	ZL55 MPM	O75054	no	3321	IGSF3	IGSF3_HUMAN	24	1	2
Human	Glioblastoma exvivo	O75054	no	3321	IGSF3	IGSF3_HUMAN	24	0.9933	1
Human	Jurkat (clone E6-1)	O75054	no	3321	IGSF3	IGSF3_HUMAN	24	0.9913	1
Human	LN-229	O75054	no	3321	IGSF3	IGSF3_HUMAN	24	0.9977	1
Human	RD	O75054	no	3321	IGSF3	IGSF3_HUMAN	24	0.9972	1
Human	SDM4	O75054	no	3321	IGSF3	IGSF3_HUMAN	24	0.9966	1
Human	U-251 MG	O75063	no	9917	FAM20B	FA20B_HUMAN	1	0.9947	2
Human	Melanoma NSph	O75071	no	9813	KIAA0494	K0494_HUMAN	5	1	3
Human	HEK	O75071	no	9813	KIAA0494	K0494_HUMAN	5	1	2
Human	IMR-32	O75071	no	9813	KIAA0494	K0494_HUMAN	5	0.9969	2
Human	LN-18	O75071	no	9813	KIAA0494	K0494_HUMAN	5	0.9976	2
Human	T98G	O75071	no	9813	KIAA0494	K0494_HUMAN	5	0.9963	1
Human	U-251 MG	O75072	no	2218	FKTN	FKTN_HUMAN	1	0.9732	1
Human	A-431	O75094	no	6586	SLIT3	SLIT3_HUMAN	9	0.9902	1
Human	HBL-1	O75094	no	6586	SLIT3	SLIT3_HUMAN	9	0.9936	1
Human	HDLM-2	O75094	no	6586	SLIT3	SLIT3_HUMAN	9	0.9945	1
Human	KM-H2	O75094	no	6586	SLIT3	SLIT3_HUMAN	9	0.9956	1
Human	L-428	O75094	no	6586	SLIT3	SLIT3_HUMAN	9	0.995	1
Human	L-540	O75094	no	6586	SLIT3	SLIT3_HUMAN	9	0.9921	1
Human	LN-18	O75094	no	6586	SLIT3	SLIT3_HUMAN	9	0.9927	1
Human	SDM5	O75094	no	6586	SLIT3	SLIT3_HUMAN	9	0.9958	1
Human	SU-DHL-6	O75094	no	6586	SLIT3	SLIT3_HUMAN	9	0.9895	1
Human	LN-18	O75096	no	4038	LRP4	LRP4_HUMAN	6	1	5
Human	LN-229	O75096	no	4038	LRP4	LRP4_HUMAN	6	1	2
Human	B-All	O75096	no	4038	LRP4	LRP4_HUMAN	6	0.986	1
Human	HEK	O75096	no	4038	LRP4	LRP4_HUMAN	6	0.9939	1
Human	T98G	O75096	no	4038	LRP4	LRP4_HUMAN	6	0.9963	1
Human	U-87 MG	O75096	no	4038	LRP4	LRP4_HUMAN	6	0.9943	1
Human	HEK	O75121	no	9848	MFAP3L	MFA3L_HUMAN	2	0.9941	1
Human	Melanoma Adh	O75121	no	9848	MFAP3L	MFA3L_HUMAN	2	0.9906	1
Human	NB4	O75144	CD275	23308	ICOSLG	ICOSL_HUMAN	21	1	12
Human	LN-18	O75144	CD275	23308	ICOSLG	ICOSL_HUMAN	21	1	11
Human	SU-DHL-6	O75144	CD275	23308	ICOSLG	ICOSL_HUMAN	21	1	10
Human	SU4 (SU-DHL-4)	O75144	CD275	23308	ICOSLG	ICOSL_HUMAN	21	1	9
Human	T98G	O75144	CD275	23308	ICOSLG	ICOSL_HUMAN	21	1	9
Human	Glioblastoma exvivo	O75144	CD275	23308	ICOSLG	ICOSL_HUMAN	21	1	8
Human	HL-60	O75144	CD275	23308	ICOSLG	ICOSL_HUMAN	21	1	8
Human	HeLa	O75144	CD275	23308	ICOSLG	ICOSL_HUMAN	21	1	6
Human	P493-6	O75144	CD275	23308	ICOSLG	ICOSL_HUMAN	21	1	6
Human	B-All	O75144	CD275	23308	ICOSLG	ICOSL_HUMAN	21	1	5
Human	A-431	O75144	CD275	23308	ICOSLG	ICOSL_HUMAN	21	1	4
Human	HEK	O75144	CD275	23308	ICOSLG	ICOSL_HUMAN	21	1	3
Human	LN-229	O75144	CD275	23308	ICOSLG	ICOSL_HUMAN	21	1	3
Human	CD4+, CD25- Tcells	O75144	CD275	23308	ICOSLG	ICOSL_HUMAN	21	1	2
Human	HBL-1	O75144	CD275	23308	ICOSLG	ICOSL_HUMAN	21	1	2
Human	L-428	O75144	CD275	23308	ICOSLG	ICOSL_HUMAN	21	1	2
Human	LNT-229	O75144	CD275	23308	ICOSLG	ICOSL_HUMAN	21	1	2
Human	SDM4	O75144	CD275	23308	ICOSLG	ICOSL_HUMAN	21	1	2
Human	U-2 OS	O75144	CD275	23308	ICOSLG	ICOSL_HUMAN	21	1	2
Human	U-87 MG	O75144	CD275	23308	ICOSLG	ICOSL_HUMAN	21	0.9943	1
Human	ZL55 MPM	O75144	CD275	23308	ICOSLG	ICOSL_HUMAN	21	0.9975	1
Human	U-251 MG	O75197	no	4041	LRP5	LRP5_HUMAN	4	1	2
Human	A-431	O75197	no	4041	LRP5	LRP5_HUMAN	4	0.9868	1
Human	HEK	O75197	no	4041	LRP5	LRP5_HUMAN	4	0.8991	1
Human	RD	O75197	no	4041	LRP5	LRP5_HUMAN	4	0.9972	1
Human	U-251 MG	O75326	CD108	8482	SEMA7A	SEM7A_HUMAN	21	1	9
Human	SDM104	O75326	CD108	8482	SEMA7A	SEM7A_HUMAN	21	1	5
Human	CaLu-3	O75326	CD108	8482	SEMA7A	SEM7A_HUMAN	21	1	3
Human	Glioblastoma exvivo	O75326	CD108	8482	SEMA7A	SEM7A_HUMAN	21	1	3
Human	HBL-1	O75326	CD108	8482	SEMA7A	SEM7A_HUMAN	21	1	3
Human	HCC4012	O75326	CD108	8482	SEMA7A	SEM7A_HUMAN	21	1	3
Human	Jurkat (clone E6-1)	O75326	CD108	8482	SEMA7A	SEM7A_HUMAN	21	1	3
Human	MedB-1	O75326	CD108	8482	SEMA7A	SEM7A_HUMAN	21	1	3
Human	NB4	O75326	CD108	8482	SEMA7A	SEM7A_HUMAN	21	1	3
Human	U-2 OS	O75326	CD108	8482	SEMA7A	SEM7A_HUMAN	21	1	2
Human	786-O	O75326	CD108	8482	SEMA7A	SEM7A_HUMAN	21	0.9957	1
Human	A-431	O75326	CD108	8482	SEMA7A	SEM7A_HUMAN	21	0.9935	1
Human	hMSC	O75326	CD108	8482	SEMA7A	SEM7A_HUMAN	21	0.9745	1
Human	KM-H2	O75326	CD108	8482	SEMA7A	SEM7A_HUMAN	21	0.9943	1
Human	LN-18	O75326	CD108	8482	SEMA7A	SEM7A_HUMAN	21	0.9927	1
Human	Lymphoma	O75326	CD108	8482	SEMA7A	SEM7A_HUMAN	21	0.9928	1
Human	RD	O75326	CD108	8482	SEMA7A	SEM7A_HUMAN	21	0.9972	1
Human	Rh28	O75326	CD108	8482	SEMA7A	SEM7A_HUMAN	21	0.9544	1
Human	SDM4	O75326	CD108	8482	SEMA7A	SEM7A_HUMAN	21	0.9801	1
Human	SU-DHL-6	O75326	CD108	8482	SEMA7A	SEM7A_HUMAN	21	0.8743	1
Human	U2932	O75326	CD108	8482	SEMA7A	SEM7A_HUMAN	21	0.9907	1
Human	HL-60	O75387	no	8501	SLC43A1	LAT3_HUMAN	6	1	4
Human	NB4	O75387	no	8501	SLC43A1	LAT3_HUMAN	6	1	3
Human	CD4+, CD25- Tcells	O75387	no	8501	SLC43A1	LAT3_HUMAN	6	1	2
Human	Jurkat (clone E6-1)	O75387	no	8501	SLC43A1	LAT3_HUMAN	6	0.9913	1
Human	SU-DHL-6	O75387	no	8501	SLC43A1	LAT3_HUMAN	6	0.9895	1
Human	U2932	O75387	no	8501	SLC43A1	LAT3_HUMAN	6	0.9907	1
Human	A-431	O75396	no	9554	SEC22B	SC22B_HUMAN	6	1	2
Human	KM-H2	O75396	no	9554	SEC22B	SC22B_HUMAN	6	1	2
Human	RD	O75396	no	9554	SEC22B	SC22B_HUMAN	6	1	2
Human	HBL-1	O75396	no	9554	SEC22B	SC22B_HUMAN	6	0.9936	1
Human	U-87 MG	O75396	no	9554	SEC22B	SC22B_HUMAN	6	0.9776	1
Human	ZL55 MPM	O75396	no	9554	SEC22B	SC22B_HUMAN	6	0.9946	1
Human	SDM4	O75462	no	9244	CRLF1	CRLF1_HUMAN	2	0.9966	1
Human	U-2 OS	O75462	no	9244	CRLF1	CRLF1_HUMAN	2	0.9961	1
Human	HCC4012	O75477	no	10613	ERLIN1	ERLN1_HUMAN	6	0.9868	1
Human	HEK	O75477	no	10613	ERLIN1	ERLN1_HUMAN	6	0.9101	1
Human	LN-18	O75477	no	10613	ERLIN1	ERLN1_HUMAN	6	0.9652	1
Human	RD	O75477	no	10613	ERLIN1	ERLN1_HUMAN	6	0.9601	1
Human	Rh28	O75477	no	10613	ERLIN1	ERLN1_HUMAN	6	0.9927	1
Human	U-251 MG	O75477	no	10613	ERLIN1	ERLN1_HUMAN	6	0.9914	1
Human	Adipocytes	O75487	no	2239	GPC4	GPC4_HUMAN	3	0.958	1
Human	U-251 MG	O75487	no	2239	GPC4	GPC4_HUMAN	3	0.9941	1
Human	U-87 MG	O75487	no	2239	GPC4	GPC4_HUMAN	3	0.9937	1
Human	U-2 OS	O75503	no	1203	CLN5	CLN5_HUMAN	2	0.9659	1
Human	U-251 MG	O75503	no	1203	CLN5	CLN5_HUMAN	2	0.9941	1
Human	A-431	O75509	no	27242	TNFRSF21	TNR21_HUMAN	4	1	3
Human	IMR-32	O75509	no	27242	TNFRSF21	TNR21_HUMAN	4	0.9837	1
Human	LN-18	O75509	no	27242	TNFRSF21	TNR21_HUMAN	4	0.9927	1
Human	LN-229	O75509	no	27242	TNFRSF21	TNR21_HUMAN	4	0.9977	1
Human	PASMC	O75578	no	8515	ITGA10	ITA10_HUMAN	3	1	2
Human	Glioblastoma exvivo	O75578	no	8515	ITGA10	ITA10_HUMAN	3	0.9914	1
Human	SDM104	O75578	no	8515	ITGA10	ITA10_HUMAN	3	0.9942	1
Human	Adipocytes	O75629	no	8804	CREG1	CREG1_HUMAN	5	0.9936	1
Human	RD	O75629	no	8804	CREG1	CREG1_HUMAN	5	0.9949	1
Human	Rh28	O75629	no	8804	CREG1	CREG1_HUMAN	5	0.9952	1
Human	Ruch-2	O75629	no	8804	CREG1	CREG1_HUMAN	5	0.9941	1
Human	U-2 OS	O75629	no	8804	CREG1	CREG1_HUMAN	5	0.9774	1
Human	RD	O75718	no	10491	CRTAP	CRTAP_HUMAN	9	1	7
Human	Rh28	O75718	no	10491	CRTAP	CRTAP_HUMAN	9	1	5
Human	Ruch-2	O75718	no	10491	CRTAP	CRTAP_HUMAN	9	1	4
Human	U-251 MG	O75718	no	10491	CRTAP	CRTAP_HUMAN	9	1	3
Human	Melanoma NSph	O75718	no	10491	CRTAP	CRTAP_HUMAN	9	0.9966	2
Human	T98G	O75718	no	10491	CRTAP	CRTAP_HUMAN	9	1	2
Human	HeLa	O75718	no	10491	CRTAP	CRTAP_HUMAN	9	0.992	1
Human	SDM34	O75718	no	10491	CRTAP	CRTAP_HUMAN	9	0.9979	1
Human	U-2 OS	O75718	no	10491	CRTAP	CRTAP_HUMAN	9	0.9923	1
Human	U-251 MG	O75882	no	8455	ATRN	ATRN_HUMAN	29	1	7
Human	HEK	O75882	no	8455	ATRN	ATRN_HUMAN	29	1	6
Human	ZL55 MPM	O75882	no	8455	ATRN	ATRN_HUMAN	29	1	5
Human	A-431	O75882	no	8455	ATRN	ATRN_HUMAN	29	1	4
Human	HCC4012	O75882	no	8455	ATRN	ATRN_HUMAN	29	1	4
Human	IMR-32	O75882	no	8455	ATRN	ATRN_HUMAN	29	1	3
Human	Jurkat (clone E6-1)	O75882	no	8455	ATRN	ATRN_HUMAN	29	1	3
Human	Melanoma NSph	O75882	no	8455	ATRN	ATRN_HUMAN	29	1	3
Human	PASMC	O75882	no	8455	ATRN	ATRN_HUMAN	29	1	3
Human	RD	O75882	no	8455	ATRN	ATRN_HUMAN	29	1	3
Human	Ruch-2	O75882	no	8455	ATRN	ATRN_HUMAN	29	1	3
Human	SDM4	O75882	no	8455	ATRN	ATRN_HUMAN	29	1	3
Human	SDM5	O75882	no	8455	ATRN	ATRN_HUMAN	29	1	3
Human	U-2 OS	O75882	no	8455	ATRN	ATRN_HUMAN	29	1	3
Human	CaLu-3	O75882	no	8455	ATRN	ATRN_HUMAN	29	1	2
Human	Glioblastoma exvivo	O75882	no	8455	ATRN	ATRN_HUMAN	29	0.9998	2
Human	RH4	O75882	no	8455	ATRN	ATRN_HUMAN	29	0.9992	2
Human	U-87 MG	O75882	no	8455	ATRN	ATRN_HUMAN	29	1	2
Human	HBL-1	O75882	no	8455	ATRN	ATRN_HUMAN	29	0.9886	1
Human	HeLa	O75882	no	8455	ATRN	ATRN_HUMAN	29	0.9633	1
Human	LN-18	O75882	no	8455	ATRN	ATRN_HUMAN	29	0.9927	1
Human	LN-229	O75882	no	8455	ATRN	ATRN_HUMAN	29	0.9977	1
Human	Melanoma Adh	O75882	no	8455	ATRN	ATRN_HUMAN	29	0.8781	1
Human	P493-6	O75882	no	8455	ATRN	ATRN_HUMAN	29	0.9859	1
Human	Rh28	O75882	no	8455	ATRN	ATRN_HUMAN	29	0.9258	1
Human	SDM104	O75882	no	8455	ATRN	ATRN_HUMAN	29	0.9731	1
Human	SDM34	O75882	no	8455	ATRN	ATRN_HUMAN	29	0.992	1
Human	SU4 (SU-DHL-4)	O75882	no	8455	ATRN	ATRN_HUMAN	29	0.9925	1
Human	T98G	O75882	no	8455	ATRN	ATRN_HUMAN	29	0.9876	1
Human	LNT-229	O75954	no	10867	TSPAN9	TSN9_HUMAN	2	0.9251	1
Human	U-251 MG	O75954	no	10867	TSPAN9	TSN9_HUMAN	2	0.9506	1
Human	IMR-32	O75976	no	1362	CPD	CBPD_HUMAN	18	1	21
Human	U-251 MG	O75976	no	1362	CPD	CBPD_HUMAN	18	1	10
Human	HEK	O75976	no	1362	CPD	CBPD_HUMAN	18	1	9
Human	Rh28	O75976	no	1362	CPD	CBPD_HUMAN	18	1	9
Human	LN-18	O75976	no	1362	CPD	CBPD_HUMAN	18	1	8
Human	Melanoma NSph	O75976	no	1362	CPD	CBPD_HUMAN	18	1	8
Human	T98G	O75976	no	1362	CPD	CBPD_HUMAN	18	1	8
Human	U-87 MG	O75976	no	1362	CPD	CBPD_HUMAN	18	1	7
Human	LN-229	O75976	no	1362	CPD	CBPD_HUMAN	18	1	6
Human	U-2 OS	O75976	no	1362	CPD	CBPD_HUMAN	18	1	6
Human	HeLa	O75976	no	1362	CPD	CBPD_HUMAN	18	1	5
Human	RD	O75976	no	1362	CPD	CBPD_HUMAN	18	1	5
Human	NB4	O75976	no	1362	CPD	CBPD_HUMAN	18	1	4
Human	Ruch-2	O75976	no	1362	CPD	CBPD_HUMAN	18	1	3
Human	Melanoma Adh	O75976	no	1362	CPD	CBPD_HUMAN	18	1	2
Human	A-431	O75976	no	1362	CPD	CBPD_HUMAN	18	0.9915	1
Human	Glioblastoma exvivo	O75976	no	1362	CPD	CBPD_HUMAN	18	0.976	1
Human	HCC4012	O75976	no	1362	CPD	CBPD_HUMAN	18	0.9967	1
Human	IMR-32	O76021	no	26156	RSL1D1	RL1D1_HUMAN	4	1	2
Human	HeLa	O76021	no	26156	RSL1D1	RL1D1_HUMAN	4	0.9912	1
Human	RD	O76021	no	26156	RSL1D1	RL1D1_HUMAN	4	0.9969	1
Human	U-87 MG	O76021	no	26156	RSL1D1	RL1D1_HUMAN	4	0.9776	1
Human	HeLa	O76082	no	6584	SLC22A5	S22A5_HUMAN	36	1	6
Human	Glioblastoma exvivo	O76082	no	6584	SLC22A5	S22A5_HUMAN	36	0.9999	5
Human	A-431	O76082	no	6584	SLC22A5	S22A5_HUMAN	36	1	4
Human	HL-60	O76082	no	6584	SLC22A5	S22A5_HUMAN	36	1	4
Human	LN-18	O76082	no	6584	SLC22A5	S22A5_HUMAN	36	0.9999	4
Human	LN-229	O76082	no	6584	SLC22A5	S22A5_HUMAN	36	0.9996	4
Human	NB4	O76082	no	6584	SLC22A5	S22A5_HUMAN	36	0.9998	4
Human	P493-6	O76082	no	6584	SLC22A5	S22A5_HUMAN	36	0.9999	4
Human	T98G	O76082	no	6584	SLC22A5	S22A5_HUMAN	36	1	4
Human	U-251 MG	O76082	no	6584	SLC22A5	S22A5_HUMAN	36	1	4
Human	B-All	O76082	no	6584	SLC22A5	S22A5_HUMAN	36	1	3
Human	HEK	O76082	no	6584	SLC22A5	S22A5_HUMAN	36	1	3
Human	Jurkat (clone E6-1)	O76082	no	6584	SLC22A5	S22A5_HUMAN	36	1	3
Human	L-428	O76082	no	6584	SLC22A5	S22A5_HUMAN	36	1	3
Human	MedB-1	O76082	no	6584	SLC22A5	S22A5_HUMAN	36	1	3
Human	U-87 MG	O76082	no	6584	SLC22A5	S22A5_HUMAN	36	1	3
Human	U2932	O76082	no	6584	SLC22A5	S22A5_HUMAN	36	1	3
Human	ZL55 MPM	O76082	no	6584	SLC22A5	S22A5_HUMAN	36	1	3
Human	786-O	O76082	no	6584	SLC22A5	S22A5_HUMAN	36	1	2
Human	HDLM-2	O76082	no	6584	SLC22A5	S22A5_HUMAN	36	1	2
Human	IMR-32	O76082	no	6584	SLC22A5	S22A5_HUMAN	36	1	2
Human	L-540	O76082	no	6584	SLC22A5	S22A5_HUMAN	36	1	2
Human	Melanoma Adh	O76082	no	6584	SLC22A5	S22A5_HUMAN	36	1	2
Human	Melanoma NSph	O76082	no	6584	SLC22A5	S22A5_HUMAN	36	1	2
Human	PASMC	O76082	no	6584	SLC22A5	S22A5_HUMAN	36	1	2
Human	Ruch-2	O76082	no	6584	SLC22A5	S22A5_HUMAN	36	1	2
Human	SDM104	O76082	no	6584	SLC22A5	S22A5_HUMAN	36	1	2
Human	CaLu-3	O76082	no	6584	SLC22A5	S22A5_HUMAN	36	0.9961	1
Human	CD4+, CD25- Tcells	O76082	no	6584	SLC22A5	S22A5_HUMAN	36	0.9189	1
Human	HCC4012	O76082	no	6584	SLC22A5	S22A5_HUMAN	36	0.9967	1
Human	KM-H2	O76082	no	6584	SLC22A5	S22A5_HUMAN	36	0.9521	1
Human	RD	O76082	no	6584	SLC22A5	S22A5_HUMAN	36	0.9969	1
Human	SDM4	O76082	no	6584	SLC22A5	S22A5_HUMAN	36	0.9848	1
Human	SDM5	O76082	no	6584	SLC22A5	S22A5_HUMAN	36	0.9958	1
Human	SU-DHL-6	O76082	no	6584	SLC22A5	S22A5_HUMAN	36	0.9895	1
Human	U-2 OS	O76082	no	6584	SLC22A5	S22A5_HUMAN	36	0.9961	1
Mouse	TH-0	O88186	CD42a	54368	Gp9	GPIX_MOUSE	1	0.977	1
Mouse	2D4-iPS	O88207	no	12831	Col5a1	CO5A1_MOUSE	3	0.9959	1
Mouse	D3_ES	O88207	no	12831	Col5a1	CO5A1_MOUSE	3	0.996	1
Mouse	TTF-1_iPS	O88207	no	12831	Col5a1	CO5A1_MOUSE	3	0.9946	1
Mouse	R1_defNCS 2°	O88307	no	20660	Sorl1	SORL_MOUSE	10	1	5
Mouse	R1_primNCS 1°	O88307	no	20660	Sorl1	SORL_MOUSE	10	1	5
Mouse	Astroglia	O88307	no	20660	Sorl1	SORL_MOUSE	10	1	3
Mouse	D3_ES	O88307	no	20660	Sorl1	SORL_MOUSE	10	1	2
Mouse	159-2 ES	O88307	no	20660	Sorl1	SORL_MOUSE	10	0.9237	1
Mouse	2D4-iPS	O88307	no	20660	Sorl1	SORL_MOUSE	10	0.9808	1
Mouse	J1_EB	O88307	no	20660	Sorl1	SORL_MOUSE	10	0.9832	1
Mouse	J1_neurons	O88307	no	20660	Sorl1	SORL_MOUSE	10	0.9973	1
Mouse	R1_ES	O88307	no	20660	Sorl1	SORL_MOUSE	10	0.9927	1
Mouse	TTF-1_iPS	O88307	no	20660	Sorl1	SORL_MOUSE	10	0.9955	1
Mouse	Astroglia	O88322	no	18074	Nid2	NID2_MOUSE	14	1	3
Mouse	159-2 ES	O88322	no	18074	Nid2	NID2_MOUSE	14	1	2
Mouse	159-2 NP	O88322	no	18074	Nid2	NID2_MOUSE	14	1	2
Mouse	J1_EB	O88322	no	18074	Nid2	NID2_MOUSE	14	1	2
Mouse	R1_EB	O88322	no	18074	Nid2	NID2_MOUSE	14	1	2
Mouse	159-2 EB	O88322	no	18074	Nid2	NID2_MOUSE	14	0.9936	1
Mouse	D3_ES	O88322	no	18074	Nid2	NID2_MOUSE	14	0.9966	1
Mouse	E14Tg2a	O88322	no	18074	Nid2	NID2_MOUSE	14	0.9951	1
Mouse	Neural stem cells (forebrain)	O88322	no	18074	Nid2	NID2_MOUSE	14	0.9947	1
Mouse	Neural stem cells (spinal cord)	O88322	no	18074	Nid2	NID2_MOUSE	14	0.9972	1
Mouse	R1_defNCS 2°	O88322	no	18074	Nid2	NID2_MOUSE	14	0.996	1
Mouse	R1_ES	O88322	no	18074	Nid2	NID2_MOUSE	14	0.9927	1
Mouse	R1_primNCS 1°	O88322	no	18074	Nid2	NID2_MOUSE	14	0.9979	1
Mouse	TTF-1_iPS	O88322	no	18074	Nid2	NID2_MOUSE	14	0.9955	1
Mouse	SMA560	O88393	no	21814	Tgfbr3	TGBR3_MOUSE	6	1	2
Mouse	J1_EB	O88393	no	21814	Tgfbr3	TGBR3_MOUSE	6	0.9971	1
Mouse	J1_neurons	O88393	no	21814	Tgfbr3	TGBR3_MOUSE	6	0.9973	1
Mouse	MSC80	O88393	no	21814	Tgfbr3	TGBR3_MOUSE	6	0.9933	1
Mouse	R1_ES	O88393	no	21814	Tgfbr3	TGBR3_MOUSE	6	0.9927	1
Mouse	TH-17	O88393	no	21814	Tgfbr3	TGBR3_MOUSE	6	0.9944	1
Mouse	E14Tg2a	O88477	no	140486	Igf2bp1	IF2B1_MOUSE	2	0.9999	2
Mouse	J1_EB	O88477	no	140486	Igf2bp1	IF2B1_MOUSE	2	1	2
Mouse	Min6	O88507	no	12804	Cntfr	CNTFR_MOUSE	16	1	9
Mouse	D3_ES	O88507	no	12804	Cntfr	CNTFR_MOUSE	16	1	6
Mouse	J1_neurons	O88507	no	12804	Cntfr	CNTFR_MOUSE	16	1	6
Mouse	J1_EB	O88507	no	12804	Cntfr	CNTFR_MOUSE	16	1	5
Mouse	159-2 NP	O88507	no	12804	Cntfr	CNTFR_MOUSE	16	1	4
Mouse	Neural stem cells (forebrain)	O88507	no	12804	Cntfr	CNTFR_MOUSE	16	1	4
Mouse	R1_EB	O88507	no	12804	Cntfr	CNTFR_MOUSE	16	1	4
Mouse	TTF-1_iPS	O88507	no	12804	Cntfr	CNTFR_MOUSE	16	1	4
Mouse	E14Tg2a	O88507	no	12804	Cntfr	CNTFR_MOUSE	16	1	3
Mouse	R1_ES	O88507	no	12804	Cntfr	CNTFR_MOUSE	16	1	3
Mouse	159-2 EB	O88507	no	12804	Cntfr	CNTFR_MOUSE	16	1	2
Mouse	2D4-iPS	O88507	no	12804	Cntfr	CNTFR_MOUSE	16	1	2
Mouse	Astroglia	O88507	no	12804	Cntfr	CNTFR_MOUSE	16	1	2
Mouse	J1_NP	O88507	no	12804	Cntfr	CNTFR_MOUSE	16	1	2
Mouse	R1_defNCS 2°	O88507	no	12804	Cntfr	CNTFR_MOUSE	16	1	2
Mouse	159-2 ES	O88507	no	12804	Cntfr	CNTFR_MOUSE	16	0.9947	1
Mouse	Spleenocytes	O88627	no	269346	Slc28a2	S28A2_MOUSE	9	1	6
Mouse	TH-0	O88627	no	269346	Slc28a2	S28A2_MOUSE	9	1	4
Mouse	Astroglia	O88627	no	269346	Slc28a2	S28A2_MOUSE	9	0.9995	2
Mouse	TH-1	O88627	no	269346	Slc28a2	S28A2_MOUSE	9	1	2
Mouse	TH-17	O88627	no	269346	Slc28a2	S28A2_MOUSE	9	1	2
Mouse	J1_EB	O88627	no	269346	Slc28a2	S28A2_MOUSE	9	0.9971	1
Mouse	J774.2	O88627	no	269346	Slc28a2	S28A2_MOUSE	9	0.9909	1
Mouse	Macrophages (BM-der.)	O88627	no	269346	Slc28a2	S28A2_MOUSE	9	0.9885	1
Mouse	R1_EB	O88627	no	269346	Slc28a2	S28A2_MOUSE	9	0.9948	1
Mouse	Astroglia	O88662	no	13731	Emp2	EMP2_MOUSE	4	1	4
Mouse	MSC80	O88662	no	13731	Emp2	EMP2_MOUSE	4	1	4
Mouse	Neural stem cells (spinal cord)	O88662	no	13731	Emp2	EMP2_MOUSE	4	0.9921	1
Mouse	R1_ES	O88662	no	13731	Emp2	EMP2_MOUSE	4	0.9913	1
Mouse	Min6	O88783	no	14067	F5	FA5_MOUSE	6	0.9923	1
Mouse	R1_defNCS 2°	O88783	no	14067	F5	FA5_MOUSE	6	0.9952	1
Mouse	R1_ES	O88783	no	14067	F5	FA5_MOUSE	6	0.9913	1
Mouse	R1_primNCS 1°	O88783	no	14067	F5	FA5_MOUSE	6	0.9975	1
Mouse	TH-1	O88783	no	14067	F5	FA5_MOUSE	6	0.9939	1
Mouse	TH-17	O88783	no	14067	F5	FA5_MOUSE	6	0.9933	1
Mouse	159-2 EB	O88792	CD321	16456	F11r	JAM1_MOUSE	25	1	8
Mouse	159-2 NP	O88792	CD321	16456	F11r	JAM1_MOUSE	25	1	8
Mouse	E14Tg2a	O88792	CD321	16456	F11r	JAM1_MOUSE	25	1	8
Mouse	R1_EB	O88792	CD321	16456	F11r	JAM1_MOUSE	25	1	8
Mouse	159-2 ES	O88792	CD321	16456	F11r	JAM1_MOUSE	25	1	6
Mouse	Min6	O88792	CD321	16456	F11r	JAM1_MOUSE	25	1	6
Mouse	R1_ES	O88792	CD321	16456	F11r	JAM1_MOUSE	25	1	6
Mouse	D3_ES	O88792	CD321	16456	F11r	JAM1_MOUSE	25	1	5
Mouse	J1_EB	O88792	CD321	16456	F11r	JAM1_MOUSE	25	1	5
Mouse	2D4-iPS	O88792	CD321	16456	F11r	JAM1_MOUSE	25	1	4
Mouse	Astroglia	O88792	CD321	16456	F11r	JAM1_MOUSE	25	1	4
Mouse	R1_primNCS 1°	O88792	CD321	16456	F11r	JAM1_MOUSE	25	1	4
Mouse	TTF-1_iPS	O88792	CD321	16456	F11r	JAM1_MOUSE	25	1	4
Mouse	R1_defNCS 2°	O88792	CD321	16456	F11r	JAM1_MOUSE	25	1	3
Mouse	C2C12	O88792	CD321	16456	F11r	JAM1_MOUSE	25	1	2
Mouse	J1_neurons	O88792	CD321	16456	F11r	JAM1_MOUSE	25	1	2
Mouse	J774.2	O88792	CD321	16456	F11r	JAM1_MOUSE	25	1	2
Mouse	Adipocytes subcutaneous	O88792	CD321	16456	F11r	JAM1_MOUSE	25	0.9959	1
Mouse	GL261	O88792	CD321	16456	F11r	JAM1_MOUSE	25	0.9843	1
Mouse	J1_NP	O88792	CD321	16456	F11r	JAM1_MOUSE	25	0.9975	1
Mouse	Macrophages (BM-der.)	O88792	CD321	16456	F11r	JAM1_MOUSE	25	0.9895	1
Mouse	R1_NP_4h	O88792	CD321	16456	F11r	JAM1_MOUSE	25	0.9979	1
Mouse	Spleenocytes	O88792	CD321	16456	F11r	JAM1_MOUSE	25	0.9945	1
Mouse	TH-0	O88792	CD321	16456	F11r	JAM1_MOUSE	25	0.9946	1
Mouse	TH-1	O88792	CD321	16456	F11r	JAM1_MOUSE	25	0.8528	1
Mouse	R1_defNCS 2°	O88829	no	20454	St3gal5	SIAT9_MOUSE	1	0.8926	1
Mouse	159-2 ES	O88856	no	22022	Tpst2	TPST2_MOUSE	4	0.9947	1
Mouse	D3_ES	O88856	no	22022	Tpst2	TPST2_MOUSE	4	0.9966	1
Mouse	R1_ES	O88856	no	22022	Tpst2	TPST2_MOUSE	4	0.9927	1
Mouse	TTF-1_iPS	O88856	no	22022	Tpst2	TPST2_MOUSE	4	0.9955	1
Mouse	J1_neurons	O88998	no	56177	Olfm1	NOE1_MOUSE	2	1	3
Mouse	Neural stem cells (SVZ)	O88998	no	56177	Olfm1	NOE1_MOUSE	2	1	2
Mouse	D3_ES	O89001	no	12874	Cpd	CBPD_MOUSE	21	1	4
Mouse	MSC80	O89001	no	12874	Cpd	CBPD_MOUSE	21	1	4
Mouse	Neural stem cells (SVZ)	O89001	no	12874	Cpd	CBPD_MOUSE	21	1	4
Mouse	159-2 NP	O89001	no	12874	Cpd	CBPD_MOUSE	21	1	3
[truncated: 22,446 more rows]

## Sheet: Table_B
Organisme	ID_link	CSPA category	CD	ENTREZ geneID	Protein count	786-O	A431	Adipocytes	B-ALL	Braintumor	CaLu3	CD4+CD25-Tcells	Glioblastoma	HBL-1	HCC4012	HDLM-2	HEK	HeLa	HL-60	hMSC	IMR-32	Jurkat	KMH2	L428	L540	LN18	LN229	LNT229	Lymphoma	MedB1	MelanomaAdh	Melanoma NSph	NB4	NK cells	P493-6	PASMC	RD	Rh28	RH4	Ruch-2	SDM104	SDM34	SDM4	SDM5	SU-DHL-6	SU4 (SU-DHL-4)	T98G	U-2 OS	U-251 MG
Human	P08473	1 - high confidence	CD10	4311	29	1	1	1	1				1		1		1	1	1		1		1			1	1						1			1	1	1	1	1	1	1	1	1	1		1		1
Human	P16144	1 - high confidence	CD104	3691	5		1																			1																	1						1
Human	P11279	1 - high confidence	CD107a	3916	38		1	1	1			1	1	1	1	1	1	1	1		1	1	1	1	1	1	1		1	1	1	1	1	1		1	1	1		1	1	1			1	1	1	1	1
Human	P13473	1 - high confidence	CD107b	3920	35		1	1	1				1	1	1	1	1	1	1		1	1	1	1	1	1	1		1	1	1	1	1				1	1		1	1	1	1	1			1	1	1
Human	O75326	1 - high confidence	CD108	8482	21	1	1				1		1	1	1					1		1	1			1			1	1			1				1	1			1		1		1			1	1
Human	Q6YHK3	1 - high confidence	CD109	135228	37	1	1	1	1	1	1	1	1		1	1	1	1	1	1	1	1	1	1		1	1	1	1		1	1		1	1	1				1	1	1	1	1			1	1	1
Human	Q15223	1 - high confidence	CD111	5818	38	1	1		1			1	1	1		1	1	1	1		1	1	1	1	1	1	1	1		1	1	1	1	1	1	1	1	1	1	1			1	1	1		1	1	1
Human	P15260	1 - high confidence	CD119	3459	30		1	1	1			1	1	1		1	1	1	1					1	1	1	1			1			1	1	1				1		1		1	1	1	1	1	1	1
Human	P40189	1 - high confidence	CD130	3572	28		1		1			1	1		1		1	1			1	1		1	1	1	1	1	1		1	1			1	1					1		1	1			1	1	1
Human	Q04912	1 - high confidence	CD136	4486	14		1	1			1						1	1					1	1						1	1	1										1	1	1
Human	P07204	1 - high confidence	CD141	7056	6		1						1													1	1						1			1
Human	P13726	1 - high confidence	CD142	2152	29	1	1	1			1		1		1		1	1	1							1	1	1			1	1	1		1		1	1	1	1	1	1	1	1			1	1	1
Human	P35613	1 - high confidence	CD147	682	47	1	1	1	1	1	1	1	1	1	1	1	1	1	1	1	1	1	1	1	1	1	1	1	1	1	1	1	1	1	1	1	1	1	1	1	1	1	1	1	1	1	1	1	1
Human	Q12913	1 - high confidence	CD148	5795	40	1	1	1	1		1	1	1	1	1	1	1	1	1		1		1	1	1	1	1	1	1	1	1	1	1	1	1	1	1			1	1		1	1	1		1	1	1
Human	P15151	1 - high confidence	CD155	5817	27	1	1		1				1		1	1	1	1	1		1	1			1	1	1				1	1	1		1	1	1	1		1	1						1	1	1
Human	P78536	1 - high confidence	CD156b	6868	27		1	1	1		1				1		1				1		1	1	1	1				1	1	1		1		1	1	1		1			1	1	1	1		1	1
Human	O14672	1 - high confidence	CD156c	102	42	1	1	1	1		1	1	1	1	1	1	1	1	1		1	1	1	1	1	1	1	1	1	1	1	1	1	1	1		1	1		1	1		1	1	1	1	1	1	1
Human	Q13740	1 - high confidence	CD166	214	41	1	1		1		1	1	1	1	1	1	1	1	1	1	1	1	1	1		1	1	1	1	1	1	1	1		1	1	1			1	1	1	1	1	1	1	1	1	1
Human	P32004	1 - high confidence	CD171	3897	26		1	1	1		1		1		1		1	1			1					1	1	1			1	1	1		1		1	1	1				1	1			1	1	1
Human	Q9UNN8	1 - high confidence	CD201	10544	26	1	1	1					1		1		1	1		1	1					1	1	1			1	1		1	1	1				1	1		1	1			1	1	1
Human	O60449	1 - high confidence	CD205	4065	26		1		1		1	1	1	1		1			1	1			1	1	1	1			1	1	1	1	1	1	1	1								1	1	1
Human	Q96F46	1 - high confidence	CD217	23765	23		1		1			1	1				1	1	1			1		1	1	1	1						1	1		1	1				1			1		1	1	1	1
Human	Q13478	1 - high confidence	CD218a	8809	11		1					1				1	1						1	1	1				1					1		1							1
Human	P08069	1 - high confidence	CD221	3480	38		1		1		1	1	1	1	1		1	1	1		1	1		1	1	1	1	1	1	1	1	1	1	1	1	1	1	1	1		1		1		1	1	1	1	1
Human	P08582	1 - high confidence	CD228	4241	15		1		1						1								1	1						1	1	1										1	1	1				1	1
Human	P04156	1 - high confidence	CD230	5621	46	1	1	1	1	1	1	1	1	1	1	1	1	1	1	1		1	1	1	1	1	1	1	1	1	1	1	1	1	1	1	1	1	1	1	1	1	1	1	1	1	1	1	1
Human	P50895	1 - high confidence	CD239	4059	25	1	1	1	1				1		1						1					1	1	1			1	1			1	1	1	1	1		1	1	1				1	1	1
Human	Q9NZQ7	1 - high confidence	CD274	29126	21		1		1		1		1	1	1	1							1	1	1	1	1	1		1				1							1			1				1	1
Human	O75144	1 - high confidence	CD275	23308	21		1		1			1	1	1			1	1	1					1		1	1	1					1		1								1		1	1	1	1
Human	Q5ZPR3	1 - high confidence	CD276	80381	36	1	1	1			1		1		1	1	1	1	1	1	1				1	1	1	1	1	1	1	1	1		1	1	1	1	1	1	1	1	1	1			1	1	1
Human	P05556	1 - high confidence	CD29	3688	45	1	1	1	1		1	1	1	1	1	1	1	1	1	1	1	1	1	1	1	1	1	1	1		1	1	1	1	1	1	1	1	1	1	1	1	1	1	1	1	1	1	1
Human	P54709	1 - high confidence	CD298	483	45	1	1	1	1		1	1	1	1	1	1	1	1	1	1	1	1	1	1	1	1	1	1	1	1	1	1	1	1	1	1	1	1	1	1	1		1	1	1	1	1	1	1
Human	O14786	1 - high confidence	CD304	8829	27	1	1	1	1				1		1		1	1	1	1						1	1	1					1		1	1	1	1		1	1		1	1			1	1	1
Human	P16284	1 - high confidence	CD31	5175	14		1	1	1			1	1	1				1	1			1							1		1	1	1	1
Human	Q9UHX3	1 - high confidence	CD312	30817	29		1		1			1	1		1	1	1	1	1				1	1		1	1	1			1	1	1	1	1	1		1			1		1	1		1	1		1
Human	Q969P0	1 - high confidence	CD316	93185	36		1	1	1			1	1	1	1	1	1	1			1	1	1	1	1	1	1	1	1	1	1	1		1	1		1	1		1			1	1	1	1	1		1
Human	Q10589	1 - high confidence	CD317	684	34	1	1	1	1			1	1	1		1	1	1	1			1	1	1	1	1	1	1	1	1		1	1	1	1	1		1						1	1	1	1	1	1
Human	Q9H5V8	1 - high confidence	CD318	64866	12	1	1		1		1		1		1																				1	1					1		1	1
Human	Q9Y624	1 - high confidence	CD321	50848	12		1		1						1				1							1	1		1	1	1	1													1
Human	P12830	1 - high confidence	CD324	999	3		1																								1	1
Human	P19022	1 - high confidence	CD325	1000	27	1	1	1	1				1	1	1		1				1					1	1	1							1	1	1	1		1	1	1	1	1			1	1	1
Human	P16422	1 - high confidence	CD326	4072	4		1				1																																1
Human	P04626	1 - high confidence	CD340	2064	14		1				1						1	1								1	1	1			1					1					1						1		1
Human	Q8WTV0	1 - high confidence	CD36	949	31	1	1	1	1				1	1	1	1	1	1	1		1		1	1	1	1	1	1		1	1	1	1		1								1	1	1	1		1	1
Human	P25942	1 - high confidence	CD40	958	25	1	1	1	1			1	1	1	1	1	1						1	1					1	1	1	1		1	1						1		1	1	1	1		1
Human	P16070	1 - high confidence	CD44	960	42	1	1	1	1	1	1	1	1	1	1	1	1	1	1	1	1		1	1		1	1	1	1	1	1	1	1	1	1	1	1			1	1	1	1	1		1	1	1	1
Human	Q08722	1 - high confidence	CD47	961	44	1	1	1	1		1	1	1	1	1	1	1	1	1		1	1	1	1	1	1	1	1	1	1	1	1	1	1	1	1	1	1		1	1	1	1	1	1	1	1	1	1
Human	P09326	1 - high confidence	CD48	962	15		1		1			1		1					1			1			1				1	1			1	1	1										1	1
Human	P56199	1 - high confidence	CD49a	3672	32	1	1	1			1	1	1		1		1	1			1	1	1			1	1	1	1		1	1			1	1	1	1	1	1	1		1	1			1	1	1
Human	P17301	1 - high confidence	CD49b	3673	31	1	1	1	1		1	1	1		1		1	1			1	1	1	1		1	1	1			1	1			1	1				1	1	1	1	1			1	1	1
Human	P26006	1 - high confidence	CD49c	3675	38	1	1	1		1	1	1	1	1	1	1	1	1		1	1	1	1		1	1	1	1	1		1	1			1	1	1	1		1	1	1	1	1			1	1	1
Human	P08648	1 - high confidence	CD49e	3678	38	1	1	1	1	1	1	1	1		1		1	1	1	1		1			1	1	1	1	1		1	1	1	1	1	1	1	1	1	1	1	1	1	1			1	1	1
Human	P23229	1 - high confidence	CD49f	3655	30		1	1	1		1	1	1		1	1	1	1	1		1	1		1		1	1	1	1		1	1		1	1			1					1				1	1	1
Human	P06756	1 - high confidence	CD51	3685	42	1	1	1	1	1	1	1	1	1	1	1	1	1		1	1	1	1	1	1	1	1	1		1	1	1		1	1	1	1	1	1	1	1	1	1	1		1	1	1	1
Human	P05362	1 - high confidence	CD54	3383	41	1	1	1	1	1	1	1	1	1	1	1		1	1		1	1	1	1	1	1	1	1	1	1	1	1	1	1	1	1	1	1			1	1	1	1	1	1	1
Human	P08174	1 - high confidence	CD55	1604	40		1	1	1		1	1	1	1	1	1	1	1	1			1	1	1	1		1	1	1	1	1	1	1	1	1	1	1	1		1	1	1	1	1	1	1	1	1	1
Human	P19256	1 - high confidence	CD58	965	40	1	1	1	1		1	1	1		1	1	1	1	1		1	1	1	1	1	1	1	1	1	1	1	1	1	1	1	1				1	1		1	1	1	1	1	1	1
Human	P13987	1 - high confidence	CD59	966	45		1	1	1		1	1	1	1	1	1	1	1	1	1	1	1	1	1	1	1	1	1	1	1	1	1	1	1	1	1	1	1	1	1	1	1	1	1	1	1	1	1	1
Human	P08962	1 - high confidence	CD63	967	42	1	1	1	1		1	1	1	1	1	1	1	1	1	1	1		1	1	1	1	1		1	1	1	1	1	1	1	1	1	1		1	1	1		1	1	1	1	1	1
Human	P02786	1 - high confidence	CD71	7037	38	1	1	1	1		1		1	1	1	1	1	1	1		1	1	1	1	1	1	1		1	1	1	1	1		1	1	1	1		1	1				1	1	1	1	1
Human	P21589	1 - high confidence	CD73	4907	30	1	1	1	1		1	1	1		1			1		1	1	1				1	1	1	1		1	1			1	1	1			1	1	1	1	1			1		1
Human	Q01151	1 - high confidence	CD83	9308	15		1							1		1		1				1	1	1	1					1			1		1				1						1				1
Human	Q03405	1 - high confidence	CD87	5329	27		1	1	1		1		1		1		1	1	1						1	1	1	1			1	1	1		1	1	1			1	1		1	1			1	1	1
Human	Q8WWI5	1 - high confidence	CD92	23446	13		1	1						1		1			1			1	1								1	1					1			1						1		1
Human	P25445	1 - high confidence	CD95	355	24		1					1			1	1	1	1	1			1	1	1	1	1				1				1	1	1					1		1	1		1		1	1
Human	P48960	1 - high confidence	CD97	976	42	1	1	1	1		1	1	1	1	1	1	1	1	1	1		1	1	1	1	1	1	1	1	1	1	1	1	1	1	1	1	1	1	1	1		1	1		1	1	1	1
Human	P08195	1 - high confidence	CD98	6520	46	1	1	1	1		1	1	1	1	1	1	1	1	1	1	1	1	1	1	1	1	1	1	1	1	1	1	1	1	1	1	1	1	1	1	1	1	1	1	1	1	1	1	1
Human	Q08334	1 - high confidence	CDw210b	3588	16		1		1					1		1	1	1	1			1		1		1	1			1															1	1	1		1
Human	O95297	1 - high confidence		9019	46	1	1	1	1		1	1	1	1	1	1	1	1	1	1	1	1	1	1	1	1	1	1	1	1	1	1	1	1	1	1	1	1	1	1	1	1	1	1	1	1	1	1	1
Human	Q9Y639	1 - high confidence		27020	46	1	1	1	1		1	1	1	1	1	1	1	1	1	1	1	1	1	1	1	1	1	1	1	1	1	1	1	1	1	1	1	1	1	1	1	1	1	1	1	1	1	1	1
Human	Q99808	1 - high confidence		2030	45	1	1	1	1		1	1	1	1	1	1	1	1	1		1	1	1	1	1	1	1	1	1	1	1	1	1	1	1	1	1	1	1	1	1	1	1	1	1	1	1	1	1
Human	Q4KMQ2	1 - high confidence		196527	45	1	1	1	1		1	1	1	1	1	1	1	1	1	1	1	1	1	1	1	1	1	1	1	1	1	1	1	1	1	1	1	1	1	1	1		1	1	1	1	1	1	1
Human	Q9HD45	1 - high confidence		56889	44		1	1	1	1	1	1	1	1	1	1	1	1	1		1	1	1	1	1	1	1	1	1	1	1	1	1	1	1	1	1	1	1	1	1	1	1		1	1	1	1	1
Human	Q15043	1 - high confidence		23516	42	1	1		1		1	1	1	1	1	1	1	1	1	1	1	1	1	1	1	1	1	1		1	1	1	1	1	1	1	1	1		1	1		1	1	1	1	1	1	1
Human	P11166	1 - high confidence		6513	42	1	1	1	1		1	1	1	1		1	1	1	1	1	1	1	1	1	1	1	1	1	1	1	1	1	1	1	1	1	1	1		1	1		1		1	1	1	1	1
Human	Q13433	1 - high confidence		25800	41	1	1		1		1		1	1	1	1	1	1	1		1	1	1	1	1	1	1	1		1	1	1	1	1	1	1	1	1	1	1	1		1	1	1	1	1	1	1
Human	Q9UIW2	1 - high confidence		5361	41	1	1		1		1	1	1	1	1	1	1	1	1		1	1	1	1	1	1	1	1		1	1	1	1	1	1	1	1	1	1	1	1		1	1	1		1	1	1
Human	P42892	1 - high confidence		1889	40	1	1	1	1		1	1	1	1	1	1	1	1			1	1	1	1	1	1	1	1	1	1	1	1	1	1	1	1	1	1		1	1			1	1		1	1	1
Human	P05026	1 - high confidence		481	40	1	1		1		1	1	1	1	1		1	1	1		1	1	1	1		1	1	1	1	1	1	1	1	1	1	1	1	1	1	1	1		1	1	1		1	1	1
Human	O15031	1 - high confidence		23654	40	1	1	1	1		1		1	1	1	1	1	1	1		1	1	1	1		1	1	1	1	1	1	1	1		1	1	1	1	1	1	1		1	1	1		1	1	1
Human	Q9UIQ6	1 - high confidence		4012	39		1	1	1		1	1	1	1	1	1	1	1	1		1	1		1	1	1	1	1	1	1	1	1	1	1		1	1	1		1	1			1	1	1	1	1	1
Human	Q92859	1 - high confidence		4756	36		1		1		1	1	1	1	1	1	1	1			1	1	1	1	1	1	1		1	1	1	1	1	1		1		1		1	1			1	1	1	1	1	1
Human	Q6P4Q7	1 - high confidence		26504	35		1		1		1	1	1	1	1	1	1	1			1	1	1	1	1	1	1	1		1	1	1	1		1	1	1	1		1	1			1		1	1	1	1
Human	Q9Y6M7	1 - high confidence		9497	34	1	1		1			1	1	1			1	1	1		1	1	1	1	1	1	1	1		1	1	1	1	1	1	1					1		1	1	1	1	1		1
Human	Q92542	1 - high confidence		23385	33	1	1		1		1		1	1			1	1			1	1		1	1	1	1		1	1	1	1	1	1	1		1	1		1	1	1			1	1	1	1	1
Human	O00478	1 - high confidence		10384	33		1	1	1		1	1	1	1	1	1	1			1		1	1	1	1	1	1		1	1	1	1	1	1							1	1		1	1	1	1	1	1
Human	Q7KYR7	1 - high confidence		11120	33		1		1			1	1	1	1	1	1		1		1	1	1	1	1	1	1			1	1	1	1		1	1	1	1		1	1				1	1	1		1
Human	Q29983	1 - high confidence		4276	32	1	1				1		1		1	1	1	1				1	1	1	1	1	1				1	1			1	1	1	1		1	1	1	1	1	1		1	1	1
Human	Q9ULF5	1 - high confidence		57181	32		1		1				1	1			1	1			1	1	1	1	1	1	1			1	1	1	1		1	1		1	1		1		1	1	1	1	1	1	1
Human	P17181	1 - high confidence		3454	32		1		1		1	1	1	1		1	1	1	1			1	1	1	1	1	1		1	1		1	1	1	1	1					1		1		1	1	1		1
Human	Q96HA4	1 - high confidence		54991	32		1		1		1	1	1		1	1	1	1			1	1			1	1	1	1		1	1	1	1	1	1		1			1	1		1	1		1	1	1	1
Human	Q8N8Z6	1 - high confidence		285761	32		1		1		1		1		1	1	1	1			1		1	1	1	1	1	1	1	1	1	1		1	1	1				1	1		1	1		1	1	1	1
Human	O95136	1 - high confidence		9294	31		1	1			1		1		1		1			1	1		1	1	1	1	1	1	1	1	1	1	1		1	1					1		1	1	1		1	1	1
Human	P30450	1 - high confidence		3105	30	1	1	1			1	1	1				1			1		1	1	1		1	1	1	1		1	1	1	1	1	1				1	1	1	1	1	1		1		1
Human	Q9UMF0	1 - high confidence		7087	29	1	1	1	1		1		1		1		1	1			1	1	1	1		1	1	1		1			1		1	1				1	1	1	1	1	1			1	1
Human	Q9H6X2	1 - high confidence		84168	29		1	1	1				1		1		1	1		1		1				1	1	1			1	1			1	1	1	1	1	1	1	1	1	1			1	1	1
Human	O75882	1 - high confidence		8455	29		1				1		1	1	1		1	1			1	1				1	1				1	1			1	1	1	1	1	1	1	1	1	1		1	1	1	1
Human	P29323	1 - high confidence		2048	28	1	1				1		1		1		1	1			1	1	1	1		1	1	1					1		1	1		1	1	1	1		1	1			1	1	1
Human	P35052	1 - high confidence		2817	28	1	1		1				1				1	1			1		1	1	1	1	1	1							1	1	1	1	1	1	1	1	1	1			1	1	1
Human	P10586	1 - high confidence		5792	28	1	1		1		1		1		1	1	1	1			1	1		1		1	1	1			1	1			1	1	1	1			1		1	1			1		1
Human	Q8N766	1 - high confidence		23065	28		1	1	1			1	1	1	1	1	1				1	1	1	1	1	1	1		1	1	1	1	1					1		1							1	1	1
Human	Q9H2H9	1 - high confidence		81539	28		1				1	1	1				1	1	1		1	1	1	1	1	1	1			1					1	1	1	1		1	1		1	1	1	1			1
Human	P00533	1 - high confidence		1956	27	1	1	1			1		1		1		1	1			1					1	1	1		1					1	1	1	1		1	1	1	1	1			1	1	1
Human	Q14126	1 - high confidence		1829	27	1	1	1	1		1		1	1	1		1	1			1	1				1	1	1					1		1					1	1	1	1	1				1	1
Human	Q13641	1 - high confidence		7162	27	1	1	1	1		1		1		1		1	1		1	1							1							1	1	1	1	1	1	1		1	1			1	1	1
Human	Q96J84	1 - high confidence		55243	27	1	1		1		1		1		1		1	1				1				1	1	1			1	1			1	1	1	1		1	1		1	1			1	1	1
Human	Q8NBN3	1 - high confidence		25963	27		1	1	1						1	1	1	1	1		1	1	1	1		1	1				1	1	1				1	1		1	1					1	1	1	1
Human	P29317	1 - high confidence		1969	26	1	1				1		1		1		1	1								1	1	1			1				1	1	1	1	1	1	1	1	1	1			1	1	1
Human	P36941	1 - high confidence		4055	26	1	1		1		1		1		1			1	1	1						1	1	1			1	1	1		1	1					1	1	1	1			1	1	1
Human	Q96NT5	1 - high confidence		113235	26		1	1			1		1	1		1	1	1			1			1	1	1	1			1	1	1			1		1	1						1			1	1	1
Human	Q14118	1 - high confidence		1605	25		1	1	1				1				1	1					1	1	1	1	1	1			1	1			1			1			1		1	1	1	1			1
Human	O43157	1 - high confidence		5364	25		1	1	1		1		1		1	1	1	1			1	1				1	1	1			1	1			1	1							1	1			1	1	1
Human	Q9Y4D7	1 - high confidence		23129	25		1	1	1				1					1			1					1	1		1		1	1	1	1	1	1	1	1			1	1	1				1	1	1
Human	Q99523	1 - high confidence		6272	25		1	1	1			1	1	1			1		1		1	1	1	1	1	1	1				1	1			1		1	1									1	1	1
Human	Q9C0H2	1 - high confidence		80727	24	1	1		1				1				1	1	1		1	1	1			1	1				1	1	1				1	1		1			1	1			1	1	1
Human	O75054	1 - high confidence		3321	24		1		1				1			1	1	1			1	1	1	1		1	1	1		1	1	1			1		1						1				1	1	1
Human	P69849	1 - high confidence		408050	23		1	1					1	1	1	1	1	1			1		1			1	1				1	1					1	1		1		1					1	1	1
Human	Q9H6B4	1 - high confidence		79827	22	1	1	1					1		1		1	1		1						1	1	1							1	1				1	1		1	1			1	1	1
Human	P30530	1 - high confidence		558	22	1	1				1		1		1			1								1	1	1							1	1	1	1		1		1	1	1			1	1	1
Human	Q13444	1 - high confidence		8751	21		1						1				1	1	1					1		1				1	1	1	1	1	1	1					1		1	1		1		1	1
Human	P18084	1 - high confidence		3693	20		1	1			1		1	1	1		1	1								1	1				1	1				1	1	1		1	1							1	1
Human	Q7Z6M3	1 - high confidence		284021	20		1		1				1	1					1							1	1	1					1		1	1					1		1	1	1	1	1		1
Human	Q06481	1 - high confidence		334	20		1						1					1			1		1	1	1	1	1						1				1	1		1				1	1		1	1	1
Human	Q8NFZ8	1 - high confidence		199731	20		1		1		1		1	1			1	1				1				1	1	1			1	1					1						1	1			1	1	1
Human	P01891	1 - high confidence		3105	19		1	1	1		1				1	1		1		1								1					1		1	1				1	1	1	1	1					1
Human	O60462	1 - high confidence		8828	18	1	1		1				1										1	1			1	1			1	1			1	1	1	1			1				1				1
Human	Q99650	1 - high confidence		9180	18	1	1						1		1			1								1	1	1							1	1					1		1	1			1	1	1
Human	O75976	1 - high confidence		1362	18		1						1		1		1	1			1					1	1				1	1	1				1	1		1							1	1	1
Human	P08581	1 - high confidence		4233	18		1				1		1				1	1					1	1	1	1	1								1			1					1				1		1
Human	Q96PD2	1 - high confidence		131566	18		1				1		1		1		1				1					1	1									1				1	1		1	1			1	1	1
Human	Q15262	1 - high confidence		5796	17	1	1						1			1	1					1				1	1				1	1				1	1			1							1	1	1
Human	P54760	1 - high confidence		2050	17		1		1				1				1	1								1	1				1		1		1		1	1		1			1				1		1
Human	O95490	1 - high confidence		23266	17		1				1		1				1				1					1					1	1			1	1	1	1			1		1					1	1
Human	Q86SQ4	1 - high confidence		57211	16	1	1				1				1		1	1								1	1				1	1					1				1		1	1					1
Human	Q5R3F8	1 - high confidence		114794	16	1	1		1				1					1								1	1									1					1		1	1		1		1	1
Human	Q6UXD5	1 - high confidence		26470	16		1				1						1	1			1			1		1	1				1	1					1			1				1			1	1
Human	Q9NPH3	1 - high confidence		3556	16		1		1			1	1					1	1			1			1						1	1	1			1					1					1			1
Human	Q8IWK6	1 - high confidence		166647	15		1		1				1		1		1				1					1	1										1			1			1	1			1		1
Human	P09603	1 - high confidence		1435	15		1						1		1	1	1						1	1	1	1															1			1			1		1
Human	Q13873	1 - high confidence		659	15		1						1	1	1	1	1				1				1									1	1									1	1				1
Human	Q14542	1 - high confidence		3177	15		1		1		1			1			1		1				1	1	1	1							1						1						1			1
Human	Q9Y653	1 - high confidence		9289	15		1		1				1					1							1	1	1				1	1		1	1												1	1	1
Human	Q9UIG8	1 - high confidence		28232	15		1	1			1		1				1	1					1	1										1										1			1	1	1
Human	Q9BZR6	1 - high confidence		65078	15		1		1				1		1		1	1			1					1	1						1											1			1	1	1
Human	Q8TCT8	1 - high confidence		84888	15		1				1						1	1								1	1				1	1						1		1						1		1	1
Human	Q9NPR2	1 - high confidence		10509	14	1	1									1						1		1	1	1	1						1												1	1	1
Human	Q96BD0	1 - high confidence		28231	14		1				1						1	1			1	1				1	1											1		1						1			1
Human	Q9NYQ6	1 - high confidence		9620	13		1						1				1	1			1					1	1				1	1	1		1												1
Human	P05023	1 - high confidence		476	12		1			1	1			1							1		1	1						1								1		1						1
Human	P52803	1 - high confidence		1946	12		1				1		1				1	1			1					1									1		1	1											1
Human	Q9UGT4	1 - high confidence		56241	12		1	1					1												1	1	1														1			1			1		1
Human	P31641	1 - high confidence		6533	11	1	1						1	1					1							1	1																		1				1
Human	O43194	1 - high confidence		2863	11		1				1		1		1			1								1															1		1	1				1	1
Human	P37173	1 - high confidence		7048	11		1	1	1									1																1		1					1		1		1	1			1
Human	O60487	1 - high confidence		10205	11		1	1			1	1		1			1	1								1	1
Human	P13746	1 - high confidence		3105	11		1	1				1	1		1										1								1	1			1			1		1
Human	P04439	1 - high confidence		3105	10	1	1					1					1					1		1	1				1																	1
Human	Q29980	1 - high confidence		4277	10		1										1	1				1			1	1	1													1							1		1
Human	O14494	1 - high confidence		8611	10		1	1									1	1				1									1						1	1		1									1
Human	Q6UWB1	1 - high confidence		9466	10		1									1									1	1	1		1				1												1		1		1
Human	P46531	1 - high confidence		4851	10		1						1			1	1		1					1	1								1			1								1
Human	P34925	1 - high confidence		6259	10		1						1				1						1			1	1						1													1			1
Human	P15328	1 - high confidence		2348	9		1										1	1								1	1					1			1													1
Human	P0C7U0	1 - high confidence		392617	9		1						1					1			1		1	1	1																							1
Human	O95497	1 - high confidence		8876	8		1	1	1			1	1									1											1																1
Human	Q9HCU4	1 - high confidence		1952	8		1		1								1	1								1																						1	1
Human	Q9HCN3	1 - high confidence		58986	8		1								1		1		1							1	1					1
Human	A1A5B4	1 - high confidence		338440	8		1					1		1		1														1				1											1
Human	P01889	1 - high confidence		3106	8		1	1				1					1			1		1													1						1
Human	P51148	1 - high confidence		5878	7		1																1			1				1								1		1
Human	P30511	1 - high confidence		3134	7		1		1		1					1			1			1
Human	Q01974	1 - high confidence		4920	7		1										1	1							1										1							1		1
Human	P21860	1 - high confidence		2065	7		1				1																	1			1	1						1					1
Human	O95274	1 - high confidence		27076	7		1				1				1		1	1										1
Human	P52799	1 - high confidence		1948	6		1						1				1																							1									1
Human	P21583	1 - high confidence		4254	6		1						1													1				1											1						1
Human	O95498	1 - high confidence		8875	6		1					1																		1															1	1
Human	P30459	1 - high confidence		3105	6		1								1	1																		1
Human	Q01973	1 - high confidence		4919	5		1		1		1																									1								1
Human	P27037	1 - high confidence		92	5		1										1																												1	1
Human	Q687X5	1 - high confidence		79689	5		1	1										1																	1		1
Human	Q8WXI7	1 - high confidence		94025	5		1							1				1			1														1
Human	Q9H228	1 - high confidence		53637	5		1																			1	1							1													1
Human	Q02487	1 - high confidence		1824	4		1										1	1																	1
Human	O75197	1 - high confidence		4041	4		1										1																				1												1
Human	Q04721	1 - high confidence		4853	4		1											1																										1					1
Human	O75509	1 - high confidence		27242	4		1														1					1	1
Human	Q9BZM5	1 - high confidence		80328	4		1						1				1									1
Human	P30462	1 - high confidence		3106	4		1								1							1			1
Human	P43119	1 - high confidence		5739	3		1						1																	1
Human	P05187	1 - high confidence		250	3		1											1																									1
Human	P09758	1 - high confidence		4070	3		1				1																								1
Human	Q96PQ0	1 - high confidence		57537	3		1											1																							1
Human	Q86VZ4	1 - high confidence		84918	3		1																	1																									1
Human	Q5T601	1 - high confidence		266977	3		1				1												1
Human	Q9HB29	1 - high confidence		8808	2		1																																					1
Human	P21709	1 - high confidence		2041	2		1					1
Human	P18564	1 - high confidence		3694	2		1				1
Human	Q99102	1 - high confidence		4585	2		1																																										1
Human	Q8N271	1 - high confidence		150696	2		1				1
Human	P16188	1 - high confidence		3105	1		1
Human	P22223	1 - high confidence		1001	1		1
Human	P20645	1 - high confidence		4074	42	1	1	1	1	1	1	1	1	1	1	1	1	1	1		1	1	1	1	1	1	1	1	1	1	1	1	1	1	1	1	1	1		1	1			1		1	1	1	1
Human	P15529	1 - high confidence		4179	37		1		1		1	1	1	1	1	1	1	1	1		1	1	1	1	1	1	1		1	1	1	1	1	1	1	1		1			1			1	1	1	1	1	1
Human	P27824	1 - high confidence		821	31		1		1	1	1				1	1	1	1	1		1		1	1	1	1	1			1	1	1		1	1		1	1		1		1	1	1		1	1		1
Human	Q08380	1 - high confidence		3959	31		1	1	1	1	1	1	1		1		1	1			1					1	1	1		1	1	1	1		1		1	1		1	1	1	1	1			1	1	1
Human	Q9P2B2	1 - high confidence		5738	30	1	1	1	1		1		1		1		1	1	1		1					1	1	1				1	1		1	1	1	1	1	1	1		1	1			1	1	1
Human	P11717	1 - high confidence		3482	30		1		1				1		1		1	1	1		1	1	1		1	1	1			1	1	1	1		1	1	1	1		1	1		1			1	1	1	1
Human	Q15904	1 - high confidence		537	30		1						1	1	1	1	1	1	1		1		1			1	1			1	1	1	1			1	1	1		1	1			1	1	1	1	1	1
Human	Q92508	1 - high confidence		9780	29	1	1	1	1			1	1		1		1	1				1		1	1	1	1		1		1	1	1	1	1	1				1	1			1			1		1
Human	P04843	1 - high confidence		6184	29		1		1		1		1	1	1		1				1		1	1	1	1	1			1	1	1	1		1		1	1		1		1	1	1			1	1	1
Human	Q92896	1 - high confidence		2734	29		1		1			1	1	1	1		1	1			1		1	1	1	1	1			1	1	1			1	1	1	1		1						1	1	1	1
Human	P11047	1 - high confidence		3915	29		1	1		1	1		1	1	1		1	1			1					1	1	1			1	1			1	1	1	1		1	1	1	1	1			1	1	1
Human	P07942	1 - high confidence		3912	28		1	1		1	1		1		1		1	1			1					1	1	1			1	1		1	1		1	1	1	1	1		1	1			1	1	1
Human	Q9BVK6	1 - high confidence		54732	28		1					1	1	1	1	1	1	1	1		1	1	1	1		1	1			1	1	1	1			1	1	1		1		1					1	1	1
Human	Q8TEM1	1 - high confidence		23225	24		1		1			1		1	1	1	1	1			1	1	1	1	1		1		1	1		1	1				1											1	1
Human	Q6EMK4	1 - high confidence		114990	23	1	1				1		1		1	1	1	1		1						1	1				1		1		1	1				1			1	1			1	1	1
Human	O43852	1 - high confidence		813	22		1								1		1	1			1		1			1	1			1	1	1	1		1	1	1	1		1			1				1		1
Human	P02675	1 - high confidence		2244	21	1	1	1		1	1	1		1			1	1			1							1			1	1		1	1								1	1				1	1
Human	P24821	1 - high confidence		3371	21	1	1	1		1			1		1						1					1	1	1			1	1					1	1		1	1		1	1				1	1
Human	P10646	1 - high confidence		7035	20		1				1		1					1		1						1	1	1							1	1	1	1			1	1	1	1			1		1
Human	P12259	1 - high confidence		2153	19	1	1		1		1	1		1		1		1	1				1	1	1				1	1						1							1					1
Human	P61978	1 - high confidence		3190	19		1							1	1		1	1						1		1	1				1	1	1	1			1	1		1							1	1	1
Human	P04004	1 - high confidence		7448	19		1	1		1	1			1		1			1				1	1	1	1				1			1					1					1	1			1	1
Human	P00749	1 - high confidence		5328	19		1				1		1		1				1							1	1						1				1	1		1	1		1	1			1	1	1
Human	P98160	1 - high confidence		3339	18	1	1				1		1					1		1						1		1			1	1			1	1		1			1		1	1			1	1
Human	P27797	1 - high confidence		811	18		1					1					1				1	1	1	1		1	1			1			1				1	1				1					1	1	1
Human	O15118	1 - high confidence		4864	17		1	1									1	1			1	1		1						1	1	1		1			1	1		1						1		1	1
Human	O15230	1 - high confidence		3911	17		1	1			1		1				1	1								1						1			1		1	1					1	1				1	1
Human	Q8TB96	1 - high confidence		81533	17		1								1		1	1			1		1		1	1				1		1				1				1	1			1				1	1
Human	P04844	1 - high confidence		6185	15		1				1				1						1		1			1	1					1				1	1	1		1							1		1
Human	P67809	1 - high confidence		4904	15		1				1	1						1			1		1			1	1								1	1							1				1		1
Human	O75094	1 - high confidence		6586	9		1							1		1							1	1	1	1																		1	1
Human	P36955	1 - high confidence		5176	6	1	1									1							1			1	1
Human	P01009	1 - high confidence		5265	6		1	1																					1					1														1	1
Human	Q16787	1 - high confidence		3909	5		1				1																												1		1
Human	Q92485	1 - high confidence		27293	5		1				1																																1					1
Human	P07585	1 - high confidence		1634	4		1	1		1																														1
Human	P02763	1 - high confidence		5004	4		1	1																				1																				1
Human	Q13753	1 - high confidence		3918	3		1				1
Human	Q13751	1 - high confidence		3914	2		1				1
Human	Q66K79	1 - high confidence		8532	2		1																																					1
Human	Q92854	1 - high confidence	CD100	10507	26				1			1	1	1	1	1	1	1	1		1	1		1	1	1	1		1				1	1	1										1	1	1	1	1
Human	Q93033	1 - high confidence	CD101	9398	6							1							1			1							1				1	1
Human	P13598	1 - high confidence	CD102	3384	23			1	1			1		1		1		1	1			1	1	1	1	1			1	1			1	1	1	1		1			1				1	1
Human	P38570	1 - high confidence	CD103	3682	1							1
Human	P17813	1 - high confidence	CD105	2022	8				1				1						1							1	1								1	1					1
Human	P19320	1 - high confidence	CD106	7412	10	1							1			1				1						1	1									1								1			1
Human	Q92692	1 - high confidence	CD112	5819	8			1	1				1		1						1															1													1
Human	Q9NQS3	1 - high confidence	CD113	25945	19						1		1				1	1			1	1				1	1				1	1				1				1	1		1	1			1		1
Human	P15509	1 - high confidence	CD116	1438	4													1	1																									1
Human	P10721	1 - high confidence	CD117	3815	1																											1
Human	P42702	1 - high confidence	CD118	3977	10												1	1			1				1	1							1		1			1									1
Human	P20701	1 - high confidence	CD11a	3683	8				1			1							1			1							1					1												1
Human	P11215	1 - high confidence	CD11b	3684	6			1	1			1							1														1	1
Human	P20702	1 - high confidence	CD11c	3687	6			1				1							1										1	1				1
Human	P19438	1 - high confidence	CD120a	7132	2												1																																1
Human	P14778	1 - high confidence	CD121a	3554	4																					1										1				1							1
Human	P27930	1 - high confidence	CD121b	7850	8	1										1					1	1	1	1	1																						1
Human	P14784	1 - high confidence	CD122	3560	2																				1									1
Human	P26951	1 - high confidence	CD123	3563	5				1					1		1							1	1
Human	P24394	1 - high confidence	CD124	3566	7											1		1							1					1															1		1
Human	Q01344	1 - high confidence	CD125	3568	1																			1
Human	P16871	1 - high confidence	CD127	3575	8				1			1														1			1					1	1						1					1
Human	P15144	1 - high confidence	CD13	290	20	1		1				1	1		1				1	1						1	1		1		1	1	1			1	1			1	1	1		1
Human	P32927	1 - high confidence	CD131	1439	3				1																																					1
Human	P31785	1 - high confidence	CD132	3561	14				1			1		1		1						1	1	1	1				1				1	1											1	1
Human	O43490	1 - high confidence	CD133	8842	6				1		1						1																				1	1											1
Human	P36888	1 - high confidence	CD135	2322	1				1
Human	Q07011	1 - high confidence	CD137	3604	2											1							1
Human	P08571	1 - high confidence	CD14	929	2														1							1
Human	P16234	1 - high confidence	CD140a	5156	8								1							1						1	1									1				1							1
Human	P09619	1 - high confidence	CD140b	5159	8				1				1							1						1	1									1											1	1
Human	P12821	1 - high confidence	CD143	1636	10			1	1				1				1												1							1					1			1			1
Human	P33151	1 - high confidence	CD144	1003	4			1					1																							1
Human	P43121	1 - high confidence	CD146	4162	26	1		1	1	1	1		1	1	1	1	1	1				1				1	1	1		1	1	1	1		1			1	1									1	1
Human	Q13291	1 - high confidence	CD150	6504	12				1			1				1						1	1	1	1				1	1															1	1
Human	P29965	1 - high confidence	CD154	959	2							1																	1
Human	P78325	1 - high confidence	CD156a	101	3									1										1	1
Human	Q10588	1 - high confidence	CD157	683	4			1																							1					1								1
Human	P43628	1 - high confidence	CD158b2	3804	1																													1
Human	P43629	1 - high confidence	CD158e	3811	1																													1
Human	Q8N109	1 - high confidence	CD158f1	57292	1																													1
Human	Q14954	1 - high confidence	CD158h	3806	1																													1
Human	P43632	1 - high confidence	CD158i	3809	1																													1
Human	O95971	1 - high confidence	CD160	11126	2																				1									1
Human	Q14242	1 - high confidence	CD162	6404	4							1							1			1			1
Human	Q86VB7	1 - high confidence	CD163	9332	1			1
Human	Q04900	1 - high confidence	CD164	8763	4									1			1																					1											1
Human	Q16832	1 - high confidence	CD167b	4921	8								1													1		1		1						1								1			1		1
Human	Q9BZZ2	1 - high confidence	CD169	6614	2			1		1
Human	P08637	1 - high confidence	CD16a	2214	3				1										1															1
Human	O75015	1 - high confidence	CD16b	2215	2				1																									1
Human	O15389	1 - high confidence	CD170	8778	7			1				1							1										1	1			1	1
Human	P78324	1 - high confidence	CD172a	140885	33	1		1	1		1	1	1	1	1		1		1	1	1					1	1	1	1	1	1	1	1		1	1				1	1		1	1	1		1	1	1
Human	O00241	1 - high confidence	CD172b	10326	10								1						1										1	1	1	1	1	1		1
Human	Q9P1W8	1 - high confidence	CD172g	55423	2							1																	1
Human	P05107	1 - high confidence	CD18	3689	20			1	1	1		1		1				1	1			1							1	1			1	1	1			1					1	1	1	1		1
Human	Q99467	1 - high confidence	CD180	4064	4									1															1																1	1
Human	P25024	1 - high confidence	CD181	3577	1																													1
Human	P49682	1 - high confidence	CD183	2833	3							1																	1					1
Human	P32302	1 - high confidence	CD185	643	5							1		1																1															1
Human	P15391	1 - high confidence	CD19	930	8				1					1															1	1					1										1	1
Human	P51679	1 - high confidence	CD194	1233	5							1				1							1	1						1
Human	P32248	1 - high confidence	CD197	1236	9							1		1		1							1	1	1				1	1				1
Human	P29016	1 - high confidence	CD1b	910	1																	1
Human	P29017	1 - high confidence	CD1c	911	3									1								1							1
Human	P15813	1 - high confidence	CD1d	912	1																	1
Human	P06729	1 - high confidence	CD2	914	5							1				1							1		1				1
Human	P11836	1 - high confidence	CD20	931	5									1																1															1	1
Human	P41217	1 - high confidence	CD200	4345	17			1	1						1						1		1	1	1	1			1	1	1	1				1					1		1					1
Human	Q02763	1 - high confidence	CD202b	7010	4																					1	1									1					1
Human	P22897	1 - high confidence	CD206	4360	1				1
Human	P20023	1 - high confidence	CD21	1380	7				1			1					1					1		1					1
Human	P78552	1 - high confidence	CD213a1	3597	5											1					1			1		1																							1
Human	Q14627	1 - high confidence	CD213a2	3598	5								1																							1				1									1
Human	P20273	1 - high confidence	CD22	933	9				1					1														1	1	1					1										1	1
Human	P06213	1 - high confidence	CD220	3643	28			1	1			1	1				1	1	1		1	1		1		1	1	1		1			1		1	1	1	1			1		1	1	1		1	1	1
Human	Q15762	1 - high confidence	CD226	10666	5							1											1		1				1					1
Human	Q9HBG7	1 - high confidence	CD229	4063	9				1			1										1							1	1				1											1	1
Human	P06734	1 - high confidence	CD23	2208	10			1	1		1		1	1		1								1						1					1											1
Human	O60486	1 - high confidence	CD232	10154	14				1			1				1			1		1		1	1					1	1	1	1		1											1	1
Human	P08183	1 - high confidence	CD243	5243	8	1							1				1				1			1		1	1							1
Human	Q9BZW8	1 - high confidence	CD244	51744	6														1			1		1	1								1	1
Human	P01589	1 - high confidence	CD25	3559	2											1									1
Human	P27487	1 - high confidence	CD26	1803	22	1		1			1	1	1		1	1	1						1	1	1	1	1		1	1		1				1					1					1
Human	Q9Y6Q6	1 - high confidence	CD265	8792	5											1	1							1	1
Human	Q02223	1 - high confidence	CD269	608	6									1																1					1										1	1
Human	P26842	1 - high confidence	CD27	939	7							1																	1					1	1										1	1
Human	Q7Z6A9	1 - high confidence	CD272	151888	4							1																	1																1	1
Human	Q9BQ51	1 - high confidence	CD273	80380	9								1			1							1	1	1					1											1			1					1
Human	Q15116	1 - high confidence	CD279	5133	5				1					1								1							1	1
Human	P10747	1 - high confidence	CD28	940	4							1	1									1							1
Human	Q9UBG0	1 - high confidence	CD280	9902	28	1		1	1				1	1	1	1	1			1	1	1				1	1	1					1		1	1	1	1		1	1		1	1			1	1	1
Human	Q15399	1 - high confidence	CD281	7096	1				1
Human	O60603	1 - high confidence	CD282	7097	7				1										1					1								1	1										1	1
Human	O00206	1 - high confidence	CD284	7099	5								1						1							1	1											1
Human	Q9NR96	1 - high confidence	CD289	54106	2									1															1
Human	Q9Y5Y4	1 - high confidence	CD294	11251	4							1										1											1	1
Human	P48357	1 - high confidence	CD295	3953	3												1			1																													1
Human	P28908	1 - high confidence	CD30	943	11							1				1							1	1	1					1					1								1	1				1
Human	Q8IX05	1 - high confidence	CD302	9936	6								1				1									1																		1			1		1
Human	Q6GTX8	1 - high confidence	CD305	3903	11			1	1			1				1			1			1			1				1				1	1											1
Human	Q96RD9	1 - high confidence	CD307	83416	2																																								1
Human	Q9NQ25	1 - high confidence	CD319	57823	5									1															1	1				1
Human	P12318	1 - high confidence	CD32	2212	2														1															1
Human	P31994	1 - high confidence	CD32	2213	1																														1
Human	P57087	1 - high confidence	CD322	58494	23			1	1				1		1	1	1				1		1	1	1	1	1			1							1	1	1	1			1		1	1	1	1	1
Human	O43699	1 - high confidence	CD327	946	3																	1							1	1
Human	Q9Y286	1 - high confidence	CD328	27036	2														1															1
Human	P20138	1 - high confidence	CD33	945	5										1				1									1					1														1
Human	P11362	1 - high confidence	CD331	2260	17				1				1			1	1						1	1	1	1							1								1			1	1	1	1		1
Human	P21802	1 - high confidence	CD332	2263	3				1								1	1
Human	P22607	1 - high confidence	CD333	2261	2												1															1
Human	P22455	1 - high confidence	CD334	2264	3																																1	1	1
Human	O14931	1 - high confidence	CD337	259197	1																													1
Human	P78504	1 - high confidence	CD339	182	19				1		1		1				1	1	1					1		1	1	1				1	1			1					1						1	1	1
Human	P28906	1 - high confidence	CD34	947	3			1	1				1
Human	Q9ULV1	1 - high confidence	CD344	8322	1			1
Human	P17927	1 - high confidence	CD35	1378	5							1							1										1				1		1
Human	P04234	1 - high confidence	CD3d	915	2							1																	1
Human	P09693	1 - high confidence	CD3g	917	1																	1
Human	P01730	1 - high confidence	CD4	920	3							1													1				1
Human	P08514	1 - high confidence	CD41	3674	3							1	1																																				1
Human	P40197	1 - high confidence	CD42d	2814	3				1			1																													1
Human	P08575	1 - high confidence	CD45	5788	19			1	1			1		1		1		1	1			1	1	1	1				1	1			1	1	1										1	1
Human	P13612	1 - high confidence	CD49d	3676	30				1			1	1				1	1	1		1	1	1	1	1			1	1	1	1	1	1	1	1	1	1	1		1	1		1		1	1			1
Human	P06127	1 - high confidence	CD5	921	5							1						1				1							1																				1
Human	P32942	1 - high confidence	CD50	3385	17			1	1			1		1		1		1	1			1	1	1					1	1			1	1											1	1
Human	P13591	1 - high confidence	CD56	4684	27	1		1	1	1	1		1		1		1				1					1		1	1		1		1	1			1	1	1	1	1	1	1					1	1
Human	P30203	1 - high confidence	CD6	923	5							1										1							1					1	1
Human	P05106	1 - high confidence	CD61	3690	10			1				1	1															1		1		1									1		1					1	1
Human	P14151	1 - high confidence	CD62L	6402	9				1			1										1	1		1				1					1												1
Human	P16109	1 - high confidence	CD62P	6403	2			1				1
Human	P12314	1 - high confidence	CD64	2209	2														1														1
Human	P13688	1 - high confidence	CD66a	634	10			1			1		1	1	1																1	1											1		1
Human	P31997	1 - high confidence	CD66b	1088	1							1
Human	P40199	1 - high confidence	CD66c	4680	1				1
Human	P34810	1 - high confidence	CD68	968	3			1																		1						1
Human	P09564	1 - high confidence	CD7	924	7							1						1				1							1					1	1			1
Human	P04233	1 - high confidence	CD74	972	18			1	1				1	1		1							1	1	1				1	1	1	1	1		1										1	1			1
Human	P11912	1 - high confidence	CD79a	973	8									1															1	1					1				1						1	1
Human	P40259	1 - high confidence	CD79b	974	7				1					1															1						1										1	1
Human	P33681	1 - high confidence	CD80	941	11									1		1			1				1	1						1															1	1	1		1
Human	Q9UIB8	1 - high confidence	CD84	8832	10				1			1							1			1							1	1			1	1											1	1
Human	O75019	1 - high confidence	CD85i	11024	1																													1
Human	Q8NHL6	1 - high confidence	CD85j	10859	8				1							1			1						1				1	1															1	1
Human	P42081	1 - high confidence	CD86	942	12				1							1			1				1	1	1					1			1	1	1										1
Human	P24071	1 - high confidence	CD89	2204	2														1														1
Human	P04216	1 - high confidence	CD90	7070	25			1			1		1		1	1					1	1				1	1		1	1	1	1			1	1	1	1		1	1			1			1	1	1
Human	Q07954	1 - high confidence	CD91	4035	28			1	1	1			1		1		1	1	1	1	1			1		1	1				1	1				1	1	1		1	1	1	1	1			1	1	1
Human	P40200	1 - high confidence	CD96	10225	9				1			1										1				1	1	1	1			1		1
Human	Q13651	1 - high confidence	CDw210a	3587	5									1		1									1									1
Human	Q9BY67	1 - high confidence		23705	32	1		1	1	1		1	1				1	1			1	1		1		1	1	1	1	1	1	1		1	1		1	1	1	1			1	1			1	1	1
Human	Q13308	1 - high confidence		5754	32				1		1	1	1		1	1	1			1	1	1				1	1	1	1				1		1	1	1	1	1	1	1	1	1	1	1		1	1	1
Human	Q6PCB8	1 - high confidence		133418	30			1	1		1	1		1	1	1	1		1		1	1	1	1	1			1	1				1	1	1		1	1			1	1	1	1	1	1		1
Human	P04264	1 - high confidence		3848	30			1	1	1	1	1		1	1	1			1		1		1	1		1	1		1	1		1		1		1	1	1	1	1	1	1	1	1		1			1
Human	Q8N441	1 - high confidence		53834	26	1			1				1			1	1	1			1		1	1		1	1	1		1			1		1	1			1		1			1	1		1	1	1
Human	Q9UHW9	1 - high confidence		9990	24				1			1		1	1		1	1	1						1	1	1		1	1		1	1	1	1	1		1			1				1	1			1
Human	P54289	1 - high confidence		781	23	1		1			1		1		1		1			1	1					1	1						1		1	1	1	1	1	1	1	1	1	1				1
Human	P20036	1 - high confidence		3113	23			1	1	1		1	1	1		1	1						1	1	1		1	1	1	1	1	1		1	1										1	1	1
Human	P14384	1 - high confidence		1368	22			1	1		1		1		1		1	1	1	1						1	1	1	1		1	1			1	1					1		1	1				1
Human	P23470	1 - high confidence		5793	21	1							1		1		1				1		1	1		1	1				1				1	1		1		1	1			1			1	1	1
Human	P04222	1 - high confidence		3107	21	1		1			1	1	1							1	1	1	1	1	1		1	1		1	1	1	1	1							1							1
Human	P48551	1 - high confidence		3455	21				1			1				1	1	1				1			1	1	1		1	1	1		1	1									1	1	1	1	1
Human	Q14517	1 - high confidence		2195	21				1				1				1	1		1	1	1				1	1				1	1			1	1	1	1		1	1			1			1	1	1
Human	Q6UVK1	1 - high confidence		1464	21			1		1			1		1		1	1			1						1	1			1	1			1	1	1		1	1	1		1	1				1
Human	Q9UN70	1 - high confidence		5098	21								1		1		1				1					1	1	1		1	1	1				1	1	1		1	1				1		1	1	1
Human	P01892	1 - high confidence		3105	21			1				1	1	1		1				1	1					1	1				1	1		1	1						1			1	1		1	1	1
Human	Q13332	1 - high confidence		5802	20								1				1	1			1	1	1	1		1	1	1			1		1		1		1			1			1	1			1		1
Human	P22413	1 - high confidence		5167	20			1					1				1						1	1		1		1			1	1			1		1	1	1	1	1			1		1		1	1
Human	P19634	1 - high confidence		6548	20				1				1	1		1			1				1	1	1	1				1		1			1	1					1		1	1	1	1			1
Human	Q5VW38	1 - high confidence		57720	20			1							1		1	1			1			1		1	1			1	1	1	1				1	1		1							1	1	1
Human	P55290	1 - high confidence		1012	19	1		1					1		1												1	1							1	1	1	1		1	1	1	1	1			1	1	1
Human	P21796	1 - high confidence		7416	19					1					1		1	1			1		1			1	1		1	1	1	1					1	1		1						1	1
Human	P25116	1 - high confidence		2149	19							1	1				1						1	1		1	1	1	1		1	1		1		1					1			1			1	1	1
Human	O60245	1 - high confidence		5099	19								1				1	1								1	1				1	1			1	1	1	1	1		1		1	1			1	1	1
Human	P30464	1 - high confidence		3106	19			1				1			1			1			1								1		1	1	1		1	1				1	1		1	1				1	1
Human	P28827	1 - high confidence		5797	18	1		1					1		1		1	1						1		1	1				1	1				1				1	1		1	1			1	1
Human	Q6H3X3	1 - high confidence		353091	18	1							1	1	1	1						1	1	1			1	1		1					1	1					1				1		1		1
Human	P01903	1 - high confidence		3122	18			1	1			1		1		1							1	1	1		1	1	1	1	1	1			1										1	1
Human	Q13586	1 - high confidence		6786	18			1				1			1	1	1	1			1			1						1	1	1					1	1		1							1	1	1
Human	Q12884	1 - high confidence		2191	18			1				1	1		1													1			1	1				1				1	1	1	1	1			1	1	1
Human	P04440	1 - high confidence		3115	18			1	1					1		1	1						1	1	1		1		1	1	1	1			1										1	1	1
Human	Q9BXP2	1 - high confidence		56996	18								1			1	1				1		1	1		1	1			1	1	1	1				1	1		1							1		1
Human	O43556	1 - high confidence		8910	17			1					1					1					1	1		1	1				1	1					1	1		1					1		1	1	1
Human	Q9BX74	1 - high confidence		83941	17										1	1	1	1				1				1					1	1					1			1	1		1	1			1	1	1
Human	Q96J42	1 - high confidence		79770	17								1		1	1	1	1			1					1	1				1	1					1	1		1							1	1	1
Human	Q06418	1 - high confidence		7301	17								1			1	1	1			1	1				1	1				1	1			1								1	1			1		1
Human	P33527	1 - high confidence		4363	16							1	1						1			1	1		1	1	1					1	1		1									1			1		1
Human	P78357	1 - high confidence		8506	16										1	1	1				1										1	1			1	1	1	1		1		1						1	1
Human	Q9Y487	1 - high confidence		23545	16											1	1	1			1	1	1	1							1	1					1	1		1							1	1	1
Human	Q13449	1 - high confidence		4045	16				1				1				1				1	1				1	1		1		1	1				1				1								1	1
Human	Q92823	1 - high confidence		4897	16							1	1				1				1					1	1				1				1	1	1	1			1		1				1		1
Human	O95196	1 - high confidence		10675	15						1			1			1	1								1	1			1									1				1		1		1	1	1
Human	Q5VUB5	1 - high confidence		221061	15			1	1				1			1	1						1	1		1										1					1			1			1	1	1
Human	P06733	1 - high confidence		2023	14				1	1							1	1				1	1								1			1	1		1	1		1			1			1
Human	Q16585	1 - high confidence		6443	14			1					1								1					1	1	1			1	1				1	1	1	1	1									1
Human	Q9BX67	1 - high confidence		83700	14								1				1				1	1	1	1		1					1	1				1	1	1										1	1
Human	Q68D85	1 - high confidence		374383	14												1		1		1					1	1	1					1		1	1							1	1	1		1
Human	Q9HC56	1 - high confidence		5101	14				1				1				1									1						1			1		1	1		1	1				1	1			1
Human	Q9C0C4	1 - high confidence		54910	14											1	1				1		1	1	1	1					1	1					1	1						1				1	1
Human	Q7Z5N4	1 - high confidence		221935	14				1		1		1				1				1		1	1		1	1																				1	1	1
Human	Q9NT68	1 - high confidence		57451	13								1			1							1		1	1														1	1		1	1				1	1
Human	O00592	1 - high confidence		5420	13			1							1		1	1			1														1			1		1				1				1	1
Human	Q9H8M5	1 - high confidence		54805	13				1								1	1			1	1				1	1				1	1				1	1										1		1
Human	P04839	1 - high confidence		1536	13			1	1	1		1							1										1	1			1	1	1										1	1
Human	P98172	1 - high confidence		1947	13				1				1				1				1					1	1									1							1	1		1	1	1
Human	P21731	1 - high confidence		6915	13				1			1	1				1	1													1	1			1						1		1	1				1
Human	P01912	1 - high confidence		3123	12			1				1		1		1							1	1	1				1						1										1	1
Human	Q92673	1 - high confidence		6653	12				1			1		1							1					1	1						1	1			1								1	1
Human	Q96K49	1 - high confidence		84910	12										1	1								1			1			1	1	1					1					1					1	1	1
Human	Q9P0K1	1 - high confidence		53616	12											1	1				1		1	1	1					1														1	1	1			1
Human	Q9H2A7	1 - high confidence		58191	12								1	1			1	1						1	1	1		1		1																			1
Human	Q9NT99	1 - high confidence		94030	12								1			1	1				1			1		1	1					1					1		1				1					1
Human	Q3ZCQ3	1 - high confidence		400451	12												1				1	1				1	1										1	1	1					1					1
Human	P55285	1 - high confidence		1004	11	1							1													1										1		1			1		1				1		1
Human	P01871	1 - high confidence		3507	11			1				1		1											1				1					1	1			1							1		1
Human	Q6UW56	1 - high confidence		51374	11												1	1			1			1							1	1					1	1		1								1	1
Human	Q12866	1 - high confidence		10461	11				1								1				1		1	1		1	1			1	1	1	1
Human	Q9BRN9	1 - high confidence		80213	11										1		1	1			1					1					1						1	1		1					1			1
Human	Q86SJ2	1 - high confidence		347902	11						1		1													1	1											1			1		1				1	1	1
Human	P05538	1 - high confidence		3120	11			1	1							1							1	1	1				1	1					1										1
Human	Q9UN71	1 - high confidence		8641	11						1						1				1						1				1	1				1				1								1	1
Human	P05534	1 - high confidence		3105	11				1		1	1														1	1							1		1				1	1				1
Human	P56159	1 - high confidence		2674	10	1							1									1						1									1	1				1		1					1
Human	P01920	1 - high confidence		3119	10									1		1							1	1	1				1	1															1	1
Human	Q12891	1 - high confidence		8692	10				1				1												1	1	1	1			1	1															1		1
Human	O95977	1 - high confidence		8698	10				1							1			1				1	1	1								1	1	1											1
Human	Q6V0I7	1 - high confidence		79633	10								1				1	1								1									1	1	1				1			1					1
Human	Q9UHP7	1 - high confidence		29121	10				1			1											1	1	1				1					1											1	1
Human	P26012	1 - high confidence		3696	10								1															1			1	1				1								1			1		1
Human	Q9Y6N7	1 - high confidence		6091	10								1				1									1					1				1		1	1		1							1		1
Human	Q13421	1 - high confidence		10232	10			1							1			1								1									1							1	1	1		1
Human	Q9H9S5	1 - high confidence		79147	10													1								1	1					1					1	1		1							1		1
Human	Q96DU3	1 - high confidence		114836	10							1				1						1							1	1				1	1										1	1
Human	P26010	1 - high confidence		3695	9				1			1		1					1						1					1				1	1										1
Human	O43155	1 - high confidence		23768	9								1								1					1										1	1	1		1								1	1
Human	Q13797	1 - high confidence		3680	9			1	1				1				1											1			1	1					1
Human	Q6UWI2	1 - high confidence		25849	9								1	1	1									1								1										1	1						1
Human	Q8TBP5	1 - high confidence		345757	9												1	1								1					1	1								1								1	1
Human	Q13491	1 - high confidence		2824	9			1	1								1				1										1	1					1	1
Human	Q13683	1 - high confidence		3679	9			1					1								1										1	1					1	1										1	1
Human	O15394	1 - high confidence		4685	9								1												1	1		1							1	1					1		1
Human	Q08174	1 - high confidence		5097	9						1		1				1	1													1	1				1							1						1
Human	Q58EX2	1 - high confidence		54549	9				1				1				1				1	1															1	1			1							1
Human	P03989	1 - high confidence		3106	9				1		1	1	1													1								1	1										1
Human	O43570	1 - high confidence		771	8	1							1													1	1								1	1					1						1
Human	Q7Z4F1	1 - high confidence		26020	8								1					1									1					1					1	1		1									1
Human	Q7Z7M0	1 - high confidence		1954	8								1			1	1														1						1											1	1
Human	Q04771	1 - high confidence		90	8								1			1									1	1		1							1	1													1
Human	P55283	1 - high confidence		1002	8								1				1																			1	1		1				1						1
Human	P05186	1 - high confidence		249	8			1					1							1															1		1				1		1		1
Human	Q12860	1 - high confidence		1272	8												1				1		1	1							1	1											1						1
Human	P54762	1 - high confidence		2047	8			1					1	1		1							1	1						1																			1
Human	P43116	1 - high confidence		5732	8				1			1	1						1							1	1							1							1
Human	Q14956	1 - high confidence		10457	8			1					1					1													1	1								1								1
Human	O94856	1 - high confidence		23114	8								1		1					1								1										1						1				1
Human	Q96PE1	1 - high confidence		25960	8								1								1	1				1	1								1	1											1
Human	Q8TD46	1 - high confidence		131450	8							1				1							1	1						1				1											1	1
Human	Q7Z3B1	1 - high confidence		257194	8								1					1		1															1	1					1							1	1
Human	Q8NC42	1 - high confidence		284996	8							1	1				1	1						1	1									1												1
Human	Q86VZ1	1 - high confidence		286530	8				1			1		1															1	1			1	1												1
Human	Q99572	1 - high confidence		5027	7							1				1										1			1		1	1		1
Human	Q9UBS9	1 - high confidence		51430	7												1															1					1	1		1								1	1
Human	P14415	1 - high confidence		482	7				1	1							1									1				1		1																1
Human	P21453	1 - high confidence		1901	7			1						1			1						1	1												1													1
Human	Q99500	1 - high confidence		1903	7																					1	1								1												1	1	1
Human	Q15768	1 - high confidence		1949	7								1				1				1					1	1																					1
Human	P54753	1 - high confidence		2049	7				1				1																			1					1	1										1	1
Human	Q95460	1 - high confidence		3140	7									1											1																		1		1	1			1
Human	Q9NY47	1 - high confidence		9254	7				1			1					1					1			1									1														1
Human	O94911	1 - high confidence		10351	7			1					1							1												1				1								1					1
Human	Q8N2Q7	1 - high confidence		22871	7				1				1				1				1										1										1								1
Human	O60279	1 - high confidence		26032	7												1										1	1							1												1	1	1
Human	Q8NE01	1 - high confidence		26505	7																	1			1	1			1																	1	1		1
Human	Q86WC4	1 - high confidence		28962	7																			1						1							1	1		1					1				1
Human	P25106	1 - high confidence		57007	7			1					1					1																	1			1										1
Human	Q86WK6	1 - high confidence		57463	7							1					1				1					1	1										1											1
Human	Q8WY21	1 - high confidence		114815	7																								1								1	1	1									1	1
Human	Q8TF66	1 - high confidence		131578	7				1				1															1					1			1												1	1
Human	Q6ZRP7	1 - high confidence		169714	7																						1					1					1	1		1							1		1
Human	P79483	1 - high confidence		3125	7				1					1		1							1	1																						1
Human	P30481	1 - high confidence		3106	7							1	1			1						1				1							1													1
Human	P13760	1 - high confidence		3123	7								1												1					1	1	1													1
Human	O75096	1 - high confidence		4038	6				1								1									1	1																				1
Human	Q5SZK8	1 - high confidence		341640	6						1		1				1										1												1										1
Human	Q9Y5G4	1 - high confidence		56107	6								1																								1			1							1		1
Human	Q8ND94	1 - high confidence		221091	6			1					1																			1				1								1
Human	Q9UGH3	1 - high confidence		9962	6								1	1												1					1	1																	1
Human	Q9Y2I2	1 - high confidence		22854	6								1		1																				1						1			1					1
Human	Q9BRK3	1 - high confidence		54587	6								1																							1				1	1			1				1
Human	P30542	1 - high confidence		134	6								1																									1					1				1	1	1
Human	P51693	1 - high confidence		333	6											1							1	1	1	1	1
Human	P52798	1 - high confidence		1945	6				1				1					1				1																							1	1
Human	P29320	1 - high confidence		2042	6				1		1		1									1										1																	1
Human	Q95IE3	1 - high confidence		3123	6				1							1							1	1																						1			1
Human	Q9ULL4	1 - high confidence		5365	6								1																		1	1															1		1
Human	Q92629	1 - high confidence		6444	6			1					1																		1	1					1			1
Human	Q9NZ53	1 - high confidence		50512	6												1	1			1											1			1
Human	Q9H7M9	1 - high confidence		64115	6			1											1							1							1					1						1
Human	Q8IWB1	1 - high confidence		85450	6												1															1					1	1		1								1
Human	Q9BSA4	1 - high confidence		94015	6																1									1	1	1					1	1
Human	O95185	1 - high confidence		8633	6																1															1	1										1	1
Human	P30685	1 - high confidence		3106	6											1						1	1			1										1												1
Human	Q01650	1 - high confidence		8140	5						1					1							1																							1
Human	P13762	1 - high confidence		3126	5				1					1																1															1
Human	Q16620	1 - high confidence		4915	5			1					1										1							1																			1
Human	Q9Y219	1 - high confidence		3714	5				1								1	1																	1
Human	O75051	1 - high confidence		5362	5												1																				1	1					1						1
Human	Q9H3S1	1 - high confidence		64218	5																	1								1															1	1
Human	A8MVW0	1 - high confidence		284069	5								1													1						1																1
Human	Q9HCL0	1 - high confidence		54510	5								1													1	1										1										1
Human	Q8IUW5	1 - high confidence		768211	5										1										1	1																		1					1
Human	Q8N0Z9	1 - high confidence		54621	5								1					1								1																							1
Human	P54756	1 - high confidence		2044	5								1																		1				1	1													1
Human	P22794	1 - high confidence		2123	5								1	1												1																							1
Human	P17342	1 - high confidence		4883	5													1		1															1	1					1
Human	P04629	1 - high confidence		4914	5								1			1							1	1	1
Human	Q96G91	1 - high confidence		5032	5							1							1										1				1	1
Human	P25105	1 - high confidence		5724	5							1							1														1	1											1
Human	P23471	1 - high confidence		5803	5								1																		1	1																	1
Human	Q13336	1 - high confidence		6563	5								1													1	1									1											1
Human	Q99835	1 - high confidence		6608	5				1								1				1					1																							1
Human	Q96JQ0	1 - high confidence		8642	5								1													1											1	1										1
Human	Q16602	1 - high confidence		10203	5			1																													1	1		1									1
Human	Q9HC73	1 - high confidence		64109	5											1							1	1	1					1
Human	Q9H5Y7	1 - high confidence		84189	5								1								1					1	1																				1
Human	Q5QGZ9	1 - high confidence		160364	5				1			1							1														1	1
Human	Q8N3J6	1 - high confidence		253559	5			1									1																				1	1	1
Human	Q30154	1 - high confidence		3127	5			1	1							1													1																1
Human	Q30134	1 - high confidence		3123	5																		1	1							1	1														1
Human	P18465	1 - high confidence		3106	5				1			1							1						1									1
Human	P18462	1 - high confidence		3105	5				1			1										1																						1				1
Human	P30479	1 - high confidence		3106	5			1																	1										1												1
Human	P10321	1 - high confidence		3107	5			1								1																											1				1
Human	P16444	1 - high confidence		1800	4			1	1					1										1
Human	Q16288	1 - high confidence		4916	4								1								1	1
Human	P34981	1 - high confidence		7201	4											1								1																							1
Human	P22001	1 - high confidence		3738	4				1			1																	1					1
Human	P55082	1 - high confidence		4238	4												1		1							1	1
Human	P32241	1 - high confidence		7433	4							1	1				1					1
Human	O95980	1 - high confidence		8434	4								1									1														1
Human	Q6UXK5	1 - high confidence		57633	4																												1											1				1
Human	Q96GP6	1 - high confidence		91179	4												1														1	1				1
Human	Q96P31	1 - high confidence		115352	4									1																				1											1
Human	Q8IW00	1 - high confidence		196740	4								1																									1		1				1
Human	Q8TDW7	1 - high confidence		120114	4												1																				1												1
Human	Q8NFP4	1 - high confidence		266727	4								1																																		1		1
Human	Q9Y6N8	1 - high confidence		1008	4													1								1																		1			1
Human	P25101	1 - high confidence		1909	4			1					1																								1				1
Human	P54764	1 - high confidence		2043	4												1																											1			1
Human	P01130	1 - high confidence		3949	4											1		1			1																			1
Human	Q14982	1 - high confidence		4978	4								1													1		1																					1
Human	Q16880	1 - high confidence		7368	4													1																				1										1	1
Human	Q13591	1 - high confidence		9037	4								1																			1								1							1
Human	O95754	1 - high confidence		10505	4										1		1				1																												1
Human	O00533	1 - high confidence		10752	4								1																		1	1														1
Human	Q9UKX5	1 - high confidence		22801	4								1																						1	1											1
Human	Q9H159	1 - high confidence		28513	4																				1			1			1	1
Human	Q8NFM7	1 - high confidence		54756	4								1																								1	1											1
Human	Q9GZU1	1 - high confidence		57192	4												1	1			1											1
Human	Q6UWL2	1 - high confidence		64420	4							1				1																		1										1
Human	Q96PB1	1 - high confidence		64921	4												1															1						1											1
Human	Q8IZJ1	1 - high confidence		219699	4								1				1																											1					1
Human	Q9Y5G3	1 - high confidence		56104	4																					1					1	1						1
Human	P01911	1 - high confidence		3123	4			1					1			1													1
Human	P20039	1 - high confidence		3123	4			1	1																1										1
Human	P30443	1 - high confidence		3105	4				1							1																				1
Human	P18464	1 - high confidence		3106	4									1											1						1	1
Human	P13747	1 - high confidence		3133	4				1																1													1								1
Human	P10319	1 - high confidence		3106	3	1				1
Human	O95866	1 - high confidence		80739	3			1				1																						1
Human	P55287	1 - high confidence		1009	3								1																							1											1
Human	O75487	1 - high confidence		2239	3			1																																									1
Human	P14222	1 - high confidence		5551	3											1									1									1
Human	P53708	1 - high confidence		8516	3				1								1																														1
Human	Q13443	1 - high confidence		8754	3																																1			1
Human	Q14439	1 - high confidence		11245	3								1																							1													1
Human	Q9ULK0	1 - high confidence		2894	3								1				1					1
Human	Q8IZY2	1 - high confidence		10347	3							1		1											1
Human	Q96RD7	1 - high confidence		24145	3												1									1																							1
Human	Q9UNW8	1 - high confidence		29933	3				1			1																						1
Human	Q96AP7	1 - high confidence		90952	3			1	1																																					1
Human	Q8J025	1 - high confidence		147495	3				1																																1
Human	Q6UXB8	1 - high confidence		221476	3							1										1																							1
Human	P22303	1 - high confidence		43	3																		1	1													1
Human	P18825	1 - high confidence		152	3												1				1																		1
Human	P15514	1 - high confidence		374	3						1																																1
Human	P04632	1 - high confidence		826	3																					1	1																				1
Human	P55291	1 - high confidence		1013	3																																1	1	1
Human	P34972	1 - high confidence		1269	3									1								1																							1
Human	P26992	1 - high confidence		1271	3																1					1																						1
Human	P78310	1 - high confidence		1525	3												1	1																														1
Human	P55899	1 - high confidence		2217	3			1														1
Human	Q14392	1 - high confidence		2615	3									1									1	1
Human	Q30201	1 - high confidence		3077	3																				1	1																							1
Human	P25189	1 - high confidence		4359	3			1																							1	1
Human	Q99519	1 - high confidence		4758	3																																1	1		1
Human	P23467	1 - high confidence		5787	3																															1													1
Human	Q8IWT1	1 - high confidence		6330	3			1																		1	1
Human	Q03167	1 - high confidence		7049	3											1		1														1
Human	O75578	1 - high confidence		8515	3								1																							1					1
Human	Q8IZP9	1 - high confidence		10149	3												1	1
Human	Q9NZM1	1 - high confidence		26509	3																						1																				1
Human	O00398	1 - high confidence		27334	3							1																	1					1
Human	Q9UKJ1	1 - high confidence		29992	3																	1											1	1
Human	Q8NBJ9	1 - high confidence		51092	3																					1						1																	1
Human	P51805	1 - high confidence		55558	3								1																																				1
Human	Q9Y5G0	1 - high confidence		56101	3																											1				1					1
Human	Q9H1C0	1 - high confidence		57121	3				1																					1				1
Human	Q8N0W4	1 - high confidence		57502	3								1								1
Human	Q5VU97	1 - high confidence		57685	3												1									1	1
Human	Q8N126	1 - high confidence		57863	3			1																																	1							1
Human	Q9HBW9	1 - high confidence		64123	3			1																												1												1
Human	Q8N6Y1	1 - high confidence		64881	3								1																																				1
Human	Q96GX1	1 - high confidence		79867	3												1									1										1
Human	Q9H156	1 - high confidence		84631	3								1													1																							1
Human	Q96AM1	1 - high confidence		116535	3								1																											1
Human	Q8IW52	1 - high confidence		139065	3																														1									1				1
Human	Q495A1	1 - high confidence		201633	3							1																	1					1
Human	Q8IZF2	1 - high confidence		221395	3			1																		1	1
Human	Q5IJ48	1 - high confidence		286204	3																1																							1
Human	P01909	1 - high confidence		3117	3																		1	1					1
Human	A6NKC4	1 - high confidence		100132417	3			1				1																	1
Human	P04229	1 - high confidence		3123	3			1	1																																				1
Human	P30498	1 - high confidence		3106	3																										1	1															1
Human	P30485	1 - high confidence		3106	3							1							1
Human	P98164	1 - high confidence		4036	2												1																		1
Human	Q8NFJ5	1 - high confidence		9052	2						1															1
Human	P13637	1 - high confidence		478	2																																		1							1
Human	P25929	1 - high confidence		4886	2			1																																									1
Human	Q8IYL9	1 - high confidence		8477	2							1																						1
Human	Q9P244	1 - high confidence		57622	2																										1	1
Human	Q8N386	1 - high confidence		126364	2				1										1
Human	Q86T13	1 - high confidence		161198	2			1	1
Human	Q9H6L2	1 - high confidence		79583	2																																1			1
Human	Q9NYQ7	1 - high confidence		1951	2																					1	1
Human	Q9UNG2	1 - high confidence		8995	2																					1	1
Human	Q9UKZ4	1 - high confidence		10178	2								1													1
Human	Q9NRM6	1 - high confidence		55540	2									1																1
Human	Q96QV1	1 - high confidence		64399	2																											1						1
Human	Q86XX4	1 - high confidence		80144	2												1																					1
Human	Q86YT9	1 - high confidence		120425	2																								1																1
Human	Q96BF3	1 - high confidence		126259	2							1																						1
Human	Q9UMZ3	1 - high confidence		374462	2																																				1
Human	P07550	1 - high confidence		154	2																					1								1
Human	P50052	1 - high confidence		186	2																																1		1
Human	P35414	1 - high confidence		187	2			1																																								1
Human	P55286	1 - high confidence		1006	2																		1	1
Human	P47869	1 - high confidence		2555	2																	1																									1
Human	O00451	1 - high confidence		2675	2								1								1
Human	Q13003	1 - high confidence		2899	2								1																										1
Human	P41595	1 - high confidence		3357	2																											1					1
Human	P20594	1 - high confidence		4882	2								1													1
Human	P30989	1 - high confidence		4923	2								1						1
Human	P78380	1 - high confidence		4973	2													1								1
Human	Q9P232	1 - high confidence		5067	2																															1					1
Human	P23468	1 - high confidence		5789	2																																1	1
Human	P07949	1 - high confidence		5979	2																1												1
Human	Q92959	1 - high confidence		6578	2			1
Human	P35590	1 - high confidence		7075	2										1																		1
Human	P14679	1 - high confidence		7299	2																										1	1
Human	P17643	1 - high confidence		7306	2																										1	1
Human	O43184	1 - high confidence		8038	2																																1												1
Human	Q9UQC9	1 - high confidence		9635	2								1																																		1
Human	O75121	1 - high confidence		9848	2												1														1
Human	P98153	1 - high confidence		9993	2												1																				1
Human	Q96E93	1 - high confidence		10219	2							1																						1
Human	Q9HB89	1 - high confidence		10316	2																					1								1
Human	Q9Y271	1 - high confidence		10800	2																									1																1
Human	Q9UM44	1 - high confidence		11148	2											1									1
Human	Q9NY15	1 - high confidence		23166	2			1																									1
Human	A2VDJ0	1 - high confidence		23240	2																																1	1
Human	Q9NZU1	1 - high confidence		23769	2				1																	1
Human	Q9Y336	1 - high confidence		27180	2														1															1
Human	O14917	1 - high confidence		27253	2													1																															1
Human	Q6UWJ1	1 - high confidence		55002	2																																1												1
Human	Q9Y5F6	1 - high confidence		56097	2								1																																				1
Human	Q8TDY8	1 - high confidence		57722	2								1								1
Human	Q96LA5	1 - high confidence		79368	2									1																															1
Human	Q9BZM4	1 - high confidence		79465	2																		1	1
Human	Q6J4K2	1 - high confidence		80024	2												1																																1
Human	Q9BX97	1 - high confidence		83483	2			1	1
Human	Q86VW1	1 - high confidence		85413	2				1																								1
Human	Q6ZN44	1 - high confidence		90249	2												1				1
Human	Q96LD1	1 - high confidence		137868	2																					1	1
Human	A8MWY0	1 - high confidence		222223	2																1																	1
Human	Q6ZQN7	1 - high confidence		353189	2												1																	1
Human	Q9Y5F8	1 - high confidence		56099	2								1		1
Human	P30460	1 - high confidence		3106	2											1
Human	P30510	1 - high confidence		3107	2								1	1
Human	P13761	1 - high confidence		3123	2																														1										1
Human	P30487	1 - high confidence		3106	2				1																																				1
Human	P30512	1 - high confidence		3105	2				1																																					1
Human	Q04826	1 - high confidence		3106	2																								1					1
Human	Q09160	1 - high confidence		3105	2																	1																								1
Human	P30508	1 - high confidence		3107	2				1
Human	P40126	1 - high confidence		1638	2																										1	1
Human	O60330	1 - high confidence		26025	2																											1				1
Human	Q95365	1 - high confidence		0	2																									1														1
Human	Q6IEE7	1 - high confidence		124842	1												1
Human	P01906	1 - high confidence		3118	1											1
Human	Q7L0X0	1 - high confidence		9865	1																																1
Human	Q9ULB4	1 - high confidence		1007	1																					1
Human	Q8IYR6	1 - high confidence		8577	1																1
Human	Q9UHC6	1 - high confidence		26047	1				1
Human	Q9NZR2	1 - high confidence		53353	1								1
Human	Q9Y5I1	1 - high confidence		56138	1																											1
Human	Q9BXA5	1 - high confidence		56670	1																					1
Human	Q8TAB3	1 - high confidence		57526	1												1
Human	Q8NFZ4	1 - high confidence		57555	1																1
Human	Q9NTN9	1 - high confidence		57715	1																					1
Human	Q8NCM8	1 - high confidence		79659	1									1
Human	Q9BY15	1 - high confidence		84658	1																												1
Human	Q86YD3	1 - high confidence		84866	1																					1
Human	Q9HCM2	1 - high confidence		91584	1								1
Human	Q8NFT8	1 - high confidence		92737	1																																												1
Human	Q8IYS5	1 - high confidence		126014	1																					1
Human	Q9UPZ6	1 - high confidence		221981	1								1
Human	A8MVW5	1 - high confidence		253012	1																																	1
Human	Q5TF39	1 - high confidence		91749	1																1
Human	P78348	1 - high confidence		41	1												1
Human	P08913	1 - high confidence		150	1			1
Human	P30556	1 - high confidence		185	1			1
Human	Q12864	1 - high confidence		1015	1																				1
Human	P32297	1 - high confidence		1136	1																1
Human	Q99788	1 - high confidence		1240	1								1
Human	Q15722	1 - high confidence		1241	1							1
Human	P20827	1 - high confidence		1942	1													1
Human	P78333	1 - high confidence		2262	1																														1
Human	P35916	1 - high confidence		2324	1				1
Human	P28472	1 - high confidence		2562	1																																										1
Human	P16066	1 - high confidence		4881	1													1
Human	P43115	1 - high confidence		5733	1											1
Human	P18433	1 - high confidence		5786	1																	1
Human	P32418	1 - high confidence		6546	1																																				1
Human	P16473	1 - high confidence		7253	1																	1
Human	O14495	1 - high confidence		8613	1																																			1
Human	Q93038	1 - high confidence		8718	1							1
Human	Q9H013	1 - high confidence		8728	1																																												1
Human	Q92956	1 - high confidence		8764	1																											1
Human	Q96RI0	1 - high confidence		9002	1				1
Human	Q9Y5G5	1 - high confidence		9708	1								1
Human	O60896	1 - high confidence		10268	1			1
Human	Q9H3T3	1 - high confidence		10501	1																																												1
Human	Q9Y666	1 - high confidence		10723	1																	1
Human	O95183	1 - high confidence		10791	1																					1
Human	Q8NE79	1 - high confidence		11149	1																																	1
Human	Q9Y6X5	1 - high confidence		22875	1									1
Human	Q9NY25	1 - high confidence		23601	1														1
Human	Q9C0B5	1 - high confidence		25921	1																																									1
Human	Q9Y561	1 - high confidence		29967	1																																												1
Human	Q9NZ20	1 - high confidence		50487	1																																1
Human	Q4KMG0	1 - high confidence		50937	1																																1
Human	Q9NZV1	1 - high confidence		51232	1																																												1
Human	Q9Y5S1	1 - high confidence		51393	1																	1
Human	Q96F05	1 - high confidence		53838	1																																												1
Human	Q17RY6	1 - high confidence		54742	1													1
Human	Q86XS8	1 - high confidence		55819	1																	1
Human	Q9Y5I2	1 - high confidence		56139	1								1
Human	Q9UN73	1 - high confidence		56142	1																																1
Human	Q9H1E5	1 - high confidence		56255	1																																	1
Human	Q969W9	1 - high confidence		56937	1																																												1
Human	Q12836	1 - high confidence		57829	1								1
Human	Q96QU1	1 - high confidence		65217	1																				1
Human	Q9H3S3	1 - high confidence		80975	1
Human	Q9BXC1	1 - high confidence		84636	1							1
Human	Q96LC7	1 - high confidence		89790	1									1
Human	Q96PQ1	1 - high confidence		89858	1																									1
Human	Q86WI1	1 - high confidence		93035	1														1
Human	Q7RTT9	1 - high confidence		222962	1																					1
Human	Q6UX27	1 - high confidence		284415	1							1
Human	Q6ZMJ2	1 - high confidence		286133	1			1
Human	Q6DN72	1 - high confidence		343413	1																													1
Human	Q5VY43	1 - high confidence		375033	1																																				1
Human	Q9P121	1 - high confidence		50863	1																																											1
Human	P30490	1 - high confidence		3106	1				1
Human	P30453	1 - high confidence		3105	1
Human	Q29960	1 - high confidence		3107	1																														1
Human	P10316	1 - high confidence		3105	1				1
Human	P30483	1 - high confidence		3106	1																																							1
Human	P10314	1 - high confidence		3105	1																																											1
Human	Q13705	1 - high confidence		93	1												1
Human	P17948	1 - high confidence		2321	1																							1
Human	P42262	1 - high confidence		2891	1																									1
Human	P28221	1 - high confidence		3352	1																										1
Human	P51172	1 - high confidence		6339	1																																												1
Human	O94933	1 - high confidence		22865	1							1
Human	P58743	1 - high confidence		375611	1																																												1
Human	O60939	1 - high confidence		6327	1																																											1
Human	P56749	1 - high confidence		9069	1																					1
Human	Q13018	1 - high confidence		22925	1								1
Human	P10909	1 - high confidence		1191	32			1		1	1	1	1	1		1	1	1			1		1	1	1	1	1		1	1		1	1	1	1		1						1	1	1	1	1	1	1
Human	P43308	1 - high confidence		6746	29				1			1		1		1	1	1			1	1	1	1	1	1	1	1	1	1	1	1	1	1	1		1	1		1	1						1	1	1
Human	Q12907	1 - high confidence		10960	29								1	1	1	1	1	1	1		1	1	1	1	1	1	1			1	1	1	1			1	1	1		1	1					1	1	1	1
Human	P01033	1 - high confidence		7076	27					1		1	1			1	1	1			1	1	1		1	1	1	1			1	1	1		1	1	1	1		1	1						1	1	1
Human	Q9UBV2	1 - high confidence		6400	26			1	1			1	1	1	1	1	1	1			1	1	1	1		1	1				1	1	1				1	1		1		1					1	1	1
Human	P02751	1 - high confidence		2335	25	1			1	1		1	1		1		1			1	1					1	1	1			1	1		1		1	1			1	1		1	1			1	1	1
Human	Q7Z7H5	1 - high confidence		222068	25								1	1		1		1			1	1	1	1		1	1		1	1	1	1	1				1	1		1		1	1				1	1	1
Human	Q9ULI3	1 - high confidence		57493	22	1							1				1	1			1					1	1	1			1	1		1	1	1	1				1			1		1	1	1	1
Human	Q8TCT7	1 - high confidence		56928	22			1	1			1	1	1	1	1	1				1					1	1			1				1						1					1	1	1	1	1
Human	P07339	1 - high confidence		1509	21			1		1		1	1				1				1		1			1	1			1	1	1					1	1		1		1					1	1	1
Human	P11117	1 - high confidence		53	21			1								1	1	1			1		1	1	1	1	1			1		1	1				1	1		1							1	1	1
Human	Q08431	1 - high confidence		4240	18			1					1			1	1				1	1		1		1	1	1		1	1	1						1		1	1						1	1
Human	Q16363	1 - high confidence		3910	17			1		1			1		1		1									1		1			1	1			1		1				1		1	1			1		1
Human	O15321	1 - high confidence		10548	17									1	1		1	1						1		1	1		1	1		1					1	1		1							1	1	1
Human	P55058	1 - high confidence		5360	17			1			1		1	1	1	1					1			1		1											1	1			1	1	1	1					1
Human	P41221	1 - high confidence		7474	16								1		1		1	1								1	1	1							1		1	1		1	1		1	1			1		1
Human	P12111	1 - high confidence		1293	15			1	1	1		1	1						1	1						1	1										1			1	1						1	1	1
Human	P02452	1 - high confidence		1277	14	1		1		1	1	1	1		1																					1	1			1		1	1					1
Human	Q11201	1 - high confidence		6482	14			1						1	1	1	1						1	1								1								1							1	1	1
Human	O00468	1 - high confidence		375790	14			1			1				1		1														1	1					1	1		1	1			1				1	1
Human	Q96JJ7	1 - high confidence		54495	14											1	1	1				1				1	1				1	1					1	1		1							1	1	1
Human	P08123	1 - high confidence		1278	13	1		1		1	1	1	1																				1			1				1	1		1						1
Human	P06744	1 - high confidence		2821	13							1		1					1				1	1								1		1		1	1	1					1			1
Human	Q8WWB7	1 - high confidence		112770	13			1						1			1	1													1	1					1	1		1				1					1
Human	P02790	1 - high confidence		3263	13			1		1	1				1		1	1			1							1										1					1	1				1
Human	Q969N2	1 - high confidence		51604	13									1		1	1	1			1										1	1					1	1		1							1	1	1
Human	P00738	1 - high confidence		3240	13			1		1	1	1						1						1				1						1							1	1	1	1
Human	Q32P28	1 - high confidence		64175	13												1									1	1					1					1	1		1		1					1	1	1
Human	P35555	1 - high confidence		2200	13			1					1		1												1									1	1	1		1	1		1	1			1		1
Human	P01137	1 - high confidence		7040	13							1	1	1		1							1	1									1					1							1			1	1
Human	Q7L0J3	1 - high confidence		9900	13								1				1				1	1				1	1	1				1					1										1	1	1
Human	Q9Y6C2	1 - high confidence		11117	13							1	1							1	1					1	1	1			1	1				1		1		1	1
Human	Q9P0T7	1 - high confidence		252839	13								1		1		1				1									1							1	1			1			1				1	1
Human	Q99715	1 - high confidence		1303	11					1								1																			1	1		1		1	1					1	1
Human	O43567	1 - high confidence		11342	11												1	1								1					1	1					1	1		1					1				1
Human	P12110	1 - high confidence		1292	11			1		1			1													1	1										1			1	1						1	1	1
Human	P14672	1 - high confidence		6517	11			1									1	1			1	1	1			1	1			1		1																1
Human	P00734	1 - high confidence		2147	10			1			1					1							1	1		1															1		1					1	1
Human	Q96EE4	1 - high confidence		90693	10									1			1							1	1	1	1						1														1		1
Human	Q15517	1 - high confidence		1041	10					1	1	1			1			1			1																					1	1	1
Human	P07093	1 - high confidence		5270	10								1															1			1	1					1	1		1	1						1		1
Human	P43307	1 - high confidence		6745	10			1						1		1										1			1				1				1	1		1									1
Human	Q24JP5	1 - high confidence		54972	10								1		1			1								1	1	1							1						1						1		1
Human	P0C0L4	1 - high confidence		720	9					1		1						1					1					1		1				1								1						1
Human	P05997	1 - high confidence		1290	9										1																1	1					1	1		1			1					1	1
Human	P20908	1 - high confidence		1289	9													1								1											1	1		1		1					1	1	1
Human	P55083	1 - high confidence		4239	9			1					1								1						1		1				1				1	1		1
Human	P21810	1 - high confidence		633	9			1	1	1			1														1				1	1					1			1
Human	O75718	1 - high confidence		10491	9													1														1					1	1		1		1					1	1	1
Human	O95084	1 - high confidence		11098	9								1		1											1	1					1											1	1			1		1
Human	Q12841	1 - high confidence		11167	9										1		1																				1	1		1		1						1	1
Human	Q5JRA6	1 - high confidence		375056	9												1	1			1											1					1	1		1							1		1
Human	O94813	1 - high confidence		9353	8								1				1									1		1													1			1					1
Human	P28799	1 - high confidence		2896	8			1													1																1	1		1								1	1
Human	Q05707	1 - high confidence		7373	8			1		1							1															1					1	1											1
Human	P28300	1 - high confidence		4015	8																																1	1		1	1	1					1	1	1
Human	Q11206	1 - high confidence		6484	8												1	1									1				1	1	1																1
Human	Q9H0V9	1 - high confidence		81562	8													1												1		1					1	1		1								1	1
Human	P25391	1 - high confidence		284217	8						1										1									1	1	1							1									1
Human	P27169	1 - high confidence		5444	7	1		1			1																														1		1	1
Human	O15455	1 - high confidence		7098	7																					1					1	1		1				1									1		1
Human	P12109	1 - high confidence		1291	7			1					1														1										1	1		1								1
Human	P17936	1 - high confidence		3486	7					1	1		1																			1					1			1			1
Human	Q92626	1 - high confidence		7837	7										1			1																			1	1		1		1							1
Human	P48307	1 - high confidence		7980	7						1				1																	1								1	1		1				1
Human	Q99985	1 - high confidence		10512	7										1																						1	1					1				1		1
Human	Q9Y3B3	1 - high confidence		51014	7																					1	1					1					1	1		1									1
Human	P02461	1 - high confidence		1281	6	1					1																										1					1	1
Human	P13611	1 - high confidence		1462	6	1		1		1			1																																				1
Human	P02787	1 - high confidence		7018	6					1											1			1								1									1				1
Human	P02749	1 - high confidence		350	6			1		1		1						1											1														1
Human	Q6UVY6	1 - high confidence		26002	6								1																		1	1					1				1								1
Human	P00450	1 - high confidence		1356	6			1				1	1																1																		1
Human	Q14766	1 - high confidence		4052	6						1		1													1	1														1				1
Human	Q9NS62	1 - high confidence		55901	6								1												1	1										1					1								1
Human	P01023	1 - high confidence		2	5					1					1			1	1					1
Human	P01857	1 - high confidence		3500	5					1														1					1					1
Human	P02671	1 - high confidence		2243	5					1			1	1																																		1	1
Human	Q15389	1 - high confidence		284	5				1																											1					1	1					1
Human	O75629	1 - high confidence		8804	5			1																													1	1		1								1
Human	Q14563	1 - high confidence		10371	5																						1					1					1										1		1
Human	P43251	1 - high confidence		686	5					1																											1	1		1								1
Human	P01859	1 - high confidence		3501	5			1			1	1																						1									1
Human	Q15438	1 - high confidence		9267	5							1																	1					1											1
Human	Q9UK23	1 - high confidence		51172	5												1	1			1											1																	1
Human	P51884	1 - high confidence		4060	4	1		1															1																	1
Human	P01024	1 - high confidence		718	4						1													1												1							1
Human	Q9NS15	1 - high confidence		4054	4												1																							1			1						1
Human	Q9UQV4	1 - high confidence		27074	4											1	1					1								1
Human	Q9UKU9	1 - high confidence		23452	4								1																								1	1		1
Human	Q9UHL4	1 - high confidence		29952	4																											1					1	1		1
Human	Q8IUX7	1 - high confidence		165	4																	1										1					1											1
Human	P53801	1 - high confidence		754	4																																1	1		1									1
Human	P08603	1 - high confidence		3075	4			1		1																											1	1
Human	P01861	1 - high confidence		3503	4																											1						1		1									1
Human	Q8N6C5	1 - high confidence		3547	4			1													1																										1		1
Human	P24043	1 - high confidence		3908	4			1														1															1	1
Human	Q99988	1 - high confidence		9518	4																										1	1						1			1
Human	Q9BY76	1 - high confidence		51129	4								1																			1									1		1
Human	P12814	1 - high confidence		87	3					1																												1		1
Human	P02765	1 - high confidence		197	3			1		1														1
Human	P01042	1 - high confidence		3827	3			1		1																																	1
Human	P55268	1 - high confidence		3913	3			1																													1			1
Human	Q14314	1 - high confidence		10875	3			1					1																							1
Human	Q9NRN5	1 - high confidence		56944	3																																1	1										1
Human	P05090	1 - high confidence		347	3			1																							1	1
Human	P02458	1 - high confidence		1280	3																1																1	1
Human	P45452	1 - high confidence		4322	3																					1	1																				1
Human	O14638	1 - high confidence		5169	3			1															1	1
Human	P00750	1 - high confidence		5327	3																							1										1											1
Human	Q9Y646	1 - high confidence		10404	3																											1					1			1
Human	P13284	1 - high confidence		10437	3									1									1	1
Human	Q15063	1 - high confidence		10631	3								1													1																	1
Human	Q13201	1 - high confidence		22915	3			1		1		1
Human	Q9UBP4	1 - high confidence		27122	3																																			1								1	1
Human	Q6UY14	1 - high confidence		54507	3			1																																			1	1
Human	Q6UXH1	1 - high confidence		79174	3												1																					1											1
Human	Q6PJF5	1 - high confidence		79651	3													1														1																1
Human	Q9H741	1 - high confidence		79794	3												1																				1												1
Human	Q8NAU1	1 - high confidence		252995	3																																1	1	1
Human	O60656	1 - high confidence		54600	3																					1	1
Human	O43897	1 - high confidence		7092	3						1																					1																1
Human	P02760	1 - high confidence		259	2	1		1
Human	Q76M96	1 - high confidence		151887	2	1																																			1
Human	Q9UM22	1 - high confidence		54749	2																																			1
Human	Q14CZ8	1 - high confidence		220296	2			1		1
Human	A8TX70	1 - high confidence		256076	2											1																																	1
Human	Q9Y6L7	1 - high confidence		7093	2																																1	1
Human	Q96GW7	1 - high confidence		63827	2																										1	1
Human	Q96RW7	1 - high confidence		83872	2								1																			1
Human	Q9BXJ5	1 - high confidence		114898	2																																	1											1
Human	P01011	1 - high confidence		12	2			1		1
Human	P08842	1 - high confidence		412	2																																1	1
Human	P06276	1 - high confidence		590	2												1																					1
Human	P20851	1 - high confidence		725	2			1										1
Human	Q02388	1 - high confidence		1294	2																																										1		1
Human	P12107	1 - high confidence		1301	2																											1																1
Human	P98095	1 - high confidence		2199	2			1														1
Human	O14498	1 - high confidence		3671	2																															1		1
Human	P47972	1 - high confidence		4885	2												1																				1
Human	P40967	1 - high confidence		6490	2																										1	1
Human	P04275	1 - high confidence		7450	2			1				1
Human	O75462	1 - high confidence		9244	2																																						1					1
Human	Q9Y5X9	1 - high confidence		9388	2								1																			1
Human	Q9Y287	1 - high confidence		9445	2																																	1											1
Human	Q14112	1 - high confidence		22795	2			1																				1
Human	Q9NR99	1 - high confidence		25878	2								1																									1
Human	Q7Z7G0	1 - high confidence		25890	2			1					1
Human	O60565	1 - high confidence		26585	2								1																												1
Human	Q9P2M7	1 - high confidence		57530	2					1		1
Human	Q6P4A8	1 - high confidence		79887	2																											1					1
Human	P58166	1 - high confidence		83729	2																1																	1
Human	A6NMZ7	1 - high confidence		131873	2			1																																	1
Human	Q8N3Z0	1 - high confidence		167681	2																																			1
Human	Q8TE58	1 - high confidence		170689	2																							1																					1
Human	A6NGN9	1 - high confidence		402665	2																																											1
Human	Q8TDJ6	1 - high confidence		23312	1																			1
Human	Q9UBQ6	1 - high confidence		2135	1																																1
Human	P49767	1 - high confidence		7424	1																																			1
Human	Q8IUK5	1 - high confidence		57125	1								1
Human	Q96JB6	1 - high confidence		84171	1																											1
Human	Q9UJJ9	1 - high confidence		84572	1																											1
Human	P04114	1 - high confidence		338	1			1
Human	P54793	1 - high confidence		416	1
Human	P23560	1 - high confidence		627	1																																1
Human	P13497	1 - high confidence		649	1								1
Human	P10645	1 - high confidence		1113	1																1
Human	P00488	1 - high confidence		2162	1			1
Human	Q10472	1 - high confidence		2589	1																																1
Human	P19823	1 - high confidence		3698	1					1
Human	P02788	1 - high confidence		4057	1			1
Human	Q92832	1 - high confidence		4745	1																																	1
Human	O00634	1 - high confidence		4917	1																																												1
Human	P20774	1 - high confidence		4969	1			1
Human	O00300	1 - high confidence		4982	1																																										1
Human	P05120	1 - high confidence		5055	1																																			1
Human	Q99574	1 - high confidence		5274	1																																1
Human	P51888	1 - high confidence		5549	1			1
Human	P13727	1 - high confidence		5553	1																												1
Human	O00391	1 - high confidence		5768	1																																												1
Human	P22105	1 - high confidence		7148	1																																						1
Human	O96014	1 - high confidence		7481	1												1
Human	Q13361	1 - high confidence		8076	1			1
Human	O95841	1 - high confidence		9068	1																																1
Human	Q99784	1 - high confidence		10439	1																1
Human	O95158	1 - high confidence		11247	1																																	1
Human	Q9Y2E5	1 - high confidence		23324	1																																												1
Human	P56817	1 - high confidence		23621	1																					1
Human	P25940	1 - high confidence		50509	1																																			1
Human	Q8TAD2	1 - high confidence		53342	1													1
Human	Q9BXN1	1 - high confidence		54829	1			1
Human	Q969V3	1 - high confidence		56926	1																																												1
Human	Q6ZMP0	1 - high confidence		79875	1																																						1
Human	Q9BXX0	1 - high confidence		84034	1																											1
Human	Q96A83	1 - high confidence		136227	1																																1
Human	Q68BL7	1 - high confidence		169611	1																											1
Human	Q75V66	1 - high confidence		203859	1												1
Human	A6NI73	1 - high confidence		353514	1														1
Human	Q7Z4R8	1 - high confidence		387263	1																																1
Human	P35556	1 - high confidence		2201	1																																											1
Human	Q9H1J7	1 - high confidence		81029	1																																												1
Human	P04003	1 - high confidence		722	1			1
Human	Q12805	1 - high confidence		2202	1			1
Human	Q8N4V1	1 - high confidence		93380	1																																										1
Human	P05155	1 - high confidence		710	1																																											1
Human	Q68BL8	1 - high confidence		25903	1																																	1
Human	P48509	2 - putative	CD151	977	24		1	1					1	1	1	1	1		1			1	1	1	1						1	1	1			1				1	1		1			1		1	1
Human	P27701	2 - putative	CD82	3732	29	1	1		1			1	1	1	1	1			1			1	1	1	1	1	1			1			1		1		1	1		1	1			1		1	1		1
Human	Q8IWA5	2 - putative		57153	47	1	1	1	1	1	1	1	1	1	1	1	1	1	1	1	1	1	1	1	1	1	1	1	1	1	1	1	1	1	1	1	1	1	1	1	1	1	1	1	1	1	1	1	1
Human	Q9NY35	2 - putative		56650	46	1	1	1	1		1	1	1	1	1	1	1	1	1	1	1	1	1	1	1	1	1	1	1	1	1	1	1	1	1	1	1	1	1	1	1	1	1	1	1	1	1	1	1
Human	Q9H0X4	2 - putative		83986	46	1	1	1	1		1	1	1	1	1	1	1	1	1	1	1	1	1	1	1	1	1	1	1	1	1	1	1	1	1	1	1	1	1	1	1	1	1	1	1	1	1	1	1
Human	P43007	2 - putative		6509	43	1	1	1	1		1	1	1	1	1	1	1	1	1	1	1	1	1	1	1	1	1	1	1	1	1	1	1	1	1	1	1		1		1		1	1	1	1	1	1	1
Human	P30825	2 - putative		6541	43	1	1		1		1	1	1	1	1	1	1	1	1		1	1	1	1	1	1	1	1	1	1	1	1	1	1	1	1	1	1	1	1	1		1	1	1	1	1	1	1
Human	O60637	2 - putative		10099	40		1	1	1		1		1	1	1	1	1	1	1		1	1	1	1	1	1	1			1	1	1	1		1	1	1	1	1	1	1	1	1	1	1	1	1	1	1
Human	Q9H813	2 - putative		55248	39		1		1		1	1	1	1	1	1	1	1	1		1	1	1	1	1	1	1	1	1	1	1	1	1	1	1		1	1			1		1	1	1	1	1	1	1
Human	Q15758	2 - putative		6510	38	1	1	1	1		1	1	1	1		1	1	1	1	1	1	1	1	1	1	1	1	1		1	1	1	1		1					1	1		1	1	1	1	1	1	1
Human	O60503	2 - putative		115	37	1	1	1	1		1	1	1	1	1	1	1	1	1	1	1			1	1	1	1	1			1	1	1	1	1	1	1		1		1		1	1			1	1	1
Human	O76082	2 - putative		6584	36	1	1		1		1	1	1		1	1	1	1	1		1	1	1	1	1	1	1			1	1	1	1		1	1	1			1	1		1	1	1		1	1	1
Human	Q9UHN6	2 - putative		23670	36	1	1	1	1		1	1	1		1		1	1			1	1	1	1		1	1	1	1		1	1		1	1	1	1	1		1	1		1	1	1	1	1	1	1
Human	P55011	2 - putative		6558	35		1	1	1				1	1	1	1	1	1	1		1	1	1	1	1	1	1			1	1	1	1		1	1	1	1		1	1				1	1	1	1	1
Human	P41440	2 - putative		6573	34	1	1		1				1	1		1	1	1	1		1	1	1	1	1	1	1			1	1	1	1		1		1	1		1			1	1	1	1	1	1	1
Human	Q9NV96	2 - putative		55754	34	1	1		1			1	1	1	1	1	1	1			1	1	1	1	1	1	1		1	1	1	1	1	1			1	1		1	1				1	1	1	1	1
Human	P54852	2 - putative		2014	32		1	1				1	1			1	1	1	1		1	1	1	1	1	1	1		1	1	1	1	1	1	1	1	1	1		1	1				1		1	1	1
Human	Q8NBI5	2 - putative		29015	31		1	1	1		1	1	1	1	1			1	1			1						1		1	1	1	1	1	1	1				1	1		1	1	1	1	1	1	1
Human	O60779	2 - putative		10560	28		1		1		1		1	1		1	1	1	1		1	1	1	1	1	1				1	1	1	1				1	1			1			1	1			1	1
Human	Q6P4E1	2 - putative		113201	26		1		1				1	1		1	1	1			1		1	1		1	1			1		1	1			1	1	1		1	1	1					1	1	1
Human	Q8IWT6	2 - putative		56262	23		1		1				1	1		1					1			1	1	1	1			1	1	1	1			1								1	1	1	1	1	1
Human	Q9P273	2 - putative		55714	23		1						1		1	1	1	1					1	1	1	1	1	1			1	1					1	1		1	1			1			1	1	1
Human	P48067	2 - putative		6536	21		1						1	1			1		1			1			1	1	1	1		1					1	1				1	1			1	1		1	1	1
Human	O95857	2 - putative		27075	21		1	1	1		1		1				1	1			1		1	1		1	1	1				1								1						1	1	1	1
Human	O96005	2 - putative		1209	20		1					1	1	1		1	1	1			1					1	1				1	1					1	1		1	1						1	1	1
Human	O43657	2 - putative		7105	20		1	1			1		1		1		1	1								1	1					1				1	1	1			1			1			1	1	1
Human	O43688	2 - putative		8612	17		1				1		1		1			1								1	1	1				1			1		1			1			1	1				1	1
Human	O60266	2 - putative		109	16		1		1				1			1	1				1	1		1	1	1	1				1						1								1				1
Human	P54849	2 - putative		2012	16		1	1					1		1			1	1							1					1	1				1	1	1		1	1	1							1
Human	P48029	2 - putative		6535	15		1				1		1				1		1		1					1		1			1	1				1					1		1						1
Human	O95858	2 - putative		23555	13		1	1			1				1	1	1				1	1								1								1						1					1
Human	Q6NSJ0	2 - putative		57462	10		1										1	1								1				1					1			1								1			1
Human	Q6P9F7	2 - putative		23507	9		1		1								1				1			1		1				1																			1
Human	P43003	2 - putative		6507	8		1						1				1									1	1																				1		1
Human	P51788	2 - putative		1181	7		1										1														1	1																	1
Human	Q9Y5Y6	2 - putative		6768	5		1							1																					1										1
Human	O60636	2 - putative		10100	3		1															1												1
Human	Q9Y5L3	2 - putative		954	3		1						1
Human	A7MBM2	2 - putative		85455	3		1																			1	1
Human	Q69YZ2	2 - putative		399474	3		1						1
Human	Q3MIR4	2 - putative		161291	1		1
Human	Q16563	2 - putative		6856	42		1	1	1	1	1	1	1	1	1	1	1	1	1		1	1	1	1	1	1	1	1	1	1	1	1	1	1	1	1	1	1		1	1		1		1	1	1	1	1
Human	Q14108	2 - putative		950	34		1	1	1	1			1		1	1	1	1			1	1	1	1	1	1	1	1	1	1	1	1	1			1	1	1	1	1	1	1					1	1	1
Human	Q8TCJ2	2 - putative		201595	34		1	1	1				1	1	1	1	1	1			1	1	1	1	1	1	1		1	1	1	1	1		1		1	1	1	1	1	1					1	1	1
Human	Q96T83	2 - putative		84679	31		1		1		1		1	1	1	1	1					1	1	1	1	1				1	1	1			1	1	1			1	1		1	1	1	1	1	1	1
Human	P46977	2 - putative		3703	27		1		1				1	1		1	1	1			1	1	1	1	1	1	1		1	1	1	1	1				1	1		1		1					1	1	1
Human	Q12797	2 - putative		444	22		1	1					1		1		1	1								1	1				1	1			1	1	1	1		1	1	1					1	1	1
Human	Q96S52	2 - putative		94005	22		1	1			1		1	1	1		1	1			1						1				1	1					1	1		1		1		1			1	1	1
Human	P21333	2 - putative		2316	21		1	1		1			1					1								1	1				1	1		1	1	1	1	1		1			1	1			1		1
Human	Q9NQC3	2 - putative		57142	10		1									1		1			1		1	1													1			1						1	1
Human	Q09328	2 - putative		4249	10		1										1				1					1	1						1					1									1		1
Human	Q16706	2 - putative		4124	10		1							1	1		1	1																			1	1		1								1	1
Human	Q9NY97	2 - putative		10678	10		1									1	1	1			1											1	1														1		1
Human	Q9GZR5	2 - putative		6785	8		1														1				1		1						1								1	1					1
Human	Q8WTR4	2 - putative		81544	7		1									1		1								1	1
Human	O75396	2 - putative		9554	6		1							1									1														1
Human	O60635	2 - putative		10103	1		1
Human	P26715	2 - putative	CD159a	3821	1																													1
Human	Q12918	2 - putative	CD161	3820	1																													1
Human	P21757	2 - putative	CD204	4481	3				1	1																					1
Human	Q07075	2 - putative	CD249	2028	8	1		1		1							1	1								1	1														1
Human	O14836	2 - putative	CD267	23495	1																																								1
Human	P16671	2 - putative	CD36	948	4			1				1							1														1
Human	P11049	2 - putative	CD37	951	13				1			1		1		1			1						1				1	1				1	1										1	1
Human	P28907	2 - putative	CD38	952	13				1			1		1								1	1		1				1				1	1	1										1	1
Human	P49961	2 - putative	CD39	953	17			1	1			1		1		1			1	1			1	1		1			1	1	1	1	1		1										1
Human	P19397	2 - putative	CD53	963	13				1			1		1		1			1			1			1				1	1				1											1	1
Human	Q07108	2 - putative	CD69	969	9				1				1									1				1	1		1					1												1
Human	P32970	2 - putative	CD70	970	22	1			1			1	1	1				1				1	1	1	1	1		1		1			1		1									1	1	1		1	1
Human	P21854	2 - putative	CD72	971	5				1					1																					1										1	1
Human	P49281	2 - putative		4891	32				1		1		1	1	1		1	1	1		1	1		1	1	1	1			1	1	1		1	1		1	1		1	1			1	1	1	1	1	1
Human	P50443	2 - putative		1836	27	1			1			1	1			1	1		1		1	1		1		1	1	1		1	1	1	1		1	1					1			1	1	1	1	1	1
Human	Q9HDC9	2 - putative		57136	26			1					1	1	1		1	1			1	1	1			1	1	1		1	1	1	1				1	1		1	1	1					1	1	1
Human	O15440	2 - putative		10057	20								1	1		1	1	1	1					1	1	1				1			1						1					1	1	1	1	1	1
Human	O95477	2 - putative		19	18			1	1				1		1											1		1			1	1	1		1	1				1	1			1	1				1
Human	Q5KU26	2 - putative		81035	18			1	1		1		1		1		1				1			1		1					1					1			1	1	1	1					1	1
Human	Q9H330	2 - putative		23731	17			1					1	1	1	1	1	1			1		1							1	1	1	1				1	1											1
Human	Q9P2C4	2 - putative		57583	16								1		1		1				1					1	1				1	1				1	1	1									1	1	1
Human	Q8N697	2 - putative		121260	16			1	1						1		1	1			1		1	1						1	1	1					1	1		1								1	1
Human	P19075	2 - putative		7103	14			1			1							1		1			1	1												1		1	1			1	1	1
Human	Q9NUM4	2 - putative		54664	13							1					1				1			1						1	1	1						1		1					1	1		1	1
Human	P53794	2 - putative		6526	13				1			1	1						1							1	1	1		1			1														1	1	1
Human	Q9NX62	2 - putative		54928	13			1									1									1				1		1					1	1		1							1	1	1
Human	Q9NWD8	2 - putative		55069	13								1								1			1	1	1					1	1	1		1					1	1						1		1
Human	Q99571	2 - putative		5025	12			1									1						1	1	1	1				1		1	1				1	1		1
Human	Q04941	2 - putative		5355	11				1	1				1		1									1					1	1	1	1													1
Human	Q5T3F8	2 - putative		55362	11								1				1							1		1	1				1													1				1	1
Human	Q9BXS9	2 - putative		65010	11														1		1	1			1	1				1		1	1	1											1
Human	Q9C0K1	2 - putative		64116	10				1										1			1			1					1				1										1	1	1
Human	P22732	2 - putative		6518	10			1	1					1		1			1					1						1			1												1
Human	Q6N022	2 - putative		26011	10				1				1		1		1									1										1			1		1			1					1
Human	Q6YBV0	2 - putative		120103	10												1				1					1	1					1	1														1	1	1
Human	Q12767	2 - putative		9772	9							1	1				1				1										1	1															1
Human	Q96QE2	2 - putative		114134	9								1				1				1			1							1	1						1		1									1
Human	Q9HCM3	2 - putative		57670	8	1			1				1				1				1					1										1		1
Human	Q9H2J7	2 - putative		55117	8												1				1										1	1						1			1		1
Human	Q15413	2 - putative		6263	8																1											1					1	1		1							1	1	1
Human	P52569	2 - putative		6542	8												1				1					1	1						1								1					1	1
Human	Q68DH5	2 - putative		92255	8								1				1		1							1				1		1	1																1
Human	P01908	2 - putative		0	8			1																	1					1	1				1										1	1
Human	Q68CR1	2 - putative		23231	7										1		1				1																	1										1	1
Human	P81408	2 - putative		10712	7											1							1	1	1																				1	1			1
Human	O14524	2 - putative		23306	7																1										1	1					1	1		1									1
Human	O43462	2 - putative		51360	7												1	1			1											1					1			1									1
Human	Q5BKX6	2 - putative		57210	7												1	1					1			1	1																						1
Human	Q8IZA0	2 - putative		79932	7																					1					1	1					1	1		1									1
Human	Q9H015	2 - putative		6583	7								1										1			1	1				1		1		1
Human	O14817	2 - putative		7106	6			1														1	1	1																					1		1
Human	Q7Z3F1	2 - putative		151556	6																			1		1											1	1		1
Human	A2RU67	2 - putative		57613	6												1				1				1	1							1					1
Human	Q9BZC7	2 - putative		20	6												1	1			1					1
Human	Q92887	2 - putative		1244	6													1								1	1				1	1															1
Human	O75387	2 - putative		8501	6							1							1			1											1												1
Human	Q86UF1	2 - putative		340348	6												1					1	1	1						1		1
Human	Q92545	2 - putative		23505	5												1																				1	1		1									1
Human	P29972	2 - putative		358	5			1	1			1																	1									1
Human	O75071	2 - putative		9813	5												1				1					1						1															1
Human	Q8TDW0	2 - putative		84230	5			1	1			1																				1		1
Human	Q96BZ4	2 - putative		122618	5				1					1															1																1	1
Human	Q6ZUK4	2 - putative		219623	5								1									1				1	1
Human	O94886	2 - putative		9725	4												1									1						1																	1
Human	Q13635	2 - putative		5727	4													1			1							1				1
Human	O15439	2 - putative		10257	4								1				1	1																		1
Human	Q9P1W3	2 - putative		57156	4												1				1									1																		1
Human	A1A5C7	2 - putative		63027	4								1				1																			1					1
Human	Q5SGD2	2 - putative		151742	4											1	1	1																			1
Human	Q7Z388	2 - putative		286148	4																																1	1		1									1
Human	P54851	2 - putative		2013	3			1										1			1
Human	P22314	2 - putative		7317	3																																1	1		1
Human	Q14DG7	2 - putative		114795	3								1																												1						1
Human	Q9BXT2	2 - putative		59285	3						1																									1
Human	Q96KA5	2 - putative		81037	3												1															1																1
Human	A6NKL6	2 - putative		645369	3								1																																				1
Human	P51828	2 - putative		113	3																												1	1		1
Human	Q12999	2 - putative		6302	3																																	1									1		1
Human	Q99250	2 - putative		6326	3								1													1																1
Human	Q9Y6H6	2 - putative		10008	3														1							1							1
Human	P01850	2 - putative		28639	3							1										1							1
Human	P01848	2 - putative		28755	3							1										1							1
Human	Q58DX5	2 - putative		254827	3																					1	1									1
Human	Q9Y210	2 - putative		7225	2			1																																							1
Human	Q9NRM0	2 - putative		56606	2											1																				1
Human	Q8NBW4	2 - putative		153129	2																1																												1
Human	O43306	2 - putative		112	2			1				1
Human	Q06643	2 - putative		4050	2											1																													1
Human	P51575	2 - putative		5023	2							1																					1
Human	Q01118	2 - putative		6332	2			1																													1
Human	P23975	2 - putative		6530	2			1													1
Human	Q9P126	2 - putative		51266	2			1				1
Human	Q8NG11	2 - putative		81619	2							1																						1
Human	Q96SJ8	2 - putative		90139	2												1				1
Human	Q8WY22	2 - putative		140707	2						1												1
Human	Q7Z7N9	2 - putative		374395	2												1																							1
Human	P01914	2 - putative		0	2																						1	1
Human	Q7Z402	2 - putative		79905	2																	1	1
Human	O75954	2 - putative		10867	2																							1																					1
Human	Q8N614	2 - putative		80008	2																																								1	1
Human	Q9H1C3	2 - putative		83468	2																						1																				1
Human	Q9UKU6	2 - putative		29953	1																																				1
Human	Q9UMX9	2 - putative		51151	1																											1
Human	Q9H2X9	2 - putative		57468	1																					1
Human	Q9H5K3	2 - putative		84197	1																																												1
Human	Q8NCS7	2 - putative		204962	1												1
Human	Q6ZS10	2 - putative		388512	1																																									1
Human	Q8IX19	2 - putative		199675	1														1
Human	Q12809	2 - putative		3757	1																1
Human	P13866	2 - putative		6523	1						1
Human	P48066	2 - putative		6538	1												1
Human	Q16348	2 - putative		6565	1																																												1
Human	Q9UN76	2 - putative		11254	1						1
Human	Q8NC01	2 - putative		51267	1								1
Human	Q9NZS2	2 - putative		51348	1																													1
Human	Q8NE00	2 - putative		54868	1																																												1
Human	Q9H5I5	2 - putative		63895	1
Human	Q96T54	2 - putative		89822	1				1
Human	Q8IZM9	2 - putative		145389	1																																												1
Human	P37059	2 - putative		3294	1																																												1
Human	P56180	2 - putative		7179	1																	1
Human	Q9ULH0	2 - putative		57498	1									1
Human	Q8N468	2 - putative		148808	1													1
Human	Q8IYP9	2 - putative		254887	1																					1
Human	P04920	2 - putative		6522	1																	1
Human	Q7Z3C6	2 - putative		79065	29				1				1	1		1	1	1			1	1		1	1	1	1			1	1	1	1		1	1	1	1		1	1				1	1	1	1	1
Human	Q8IV08	2 - putative		23646	23			1					1	1		1	1				1		1	1	1	1	1						1		1		1	1		1				1	1		1		1
Human	Q9NUN5	2 - putative		55788	22			1					1	1	1	1	1	1			1		1	1		1				1	1	1	1	1												1		1	1
Human	Q3T906	2 - putative		79158	21								1	1		1	1	1								1	1		1	1	1	1	1				1	1		1							1	1	1
Human	Q9UH99	2 - putative		25777	21			1	1	1		1	1	1	1		1	1			1					1	1		1		1	1					1	1		1								1	1
Human	Q93050	2 - putative		535	18								1	1			1	1			1	1				1	1			1	1	1				1	1	1		1					1		1		1
Human	Q9NRX5	2 - putative		57515	14			1	1			1					1		1						1	1					1	1		1							1							1	1
Human	O00461	2 - putative		27333	13								1				1	1			1						1					1					1	1		1							1	1	1
Human	Q12770	2 - putative		22937	12												1	1			1	1								1	1	1					1	1										1	1
Human	Q8NFQ8	2 - putative		163590	12												1	1			1									1	1	1					1	1		1								1	1
Human	Q70UQ0	2 - putative		121457	11										1																	1				1	1	1		1		1					1	1	1
Human	Q9NRB3	2 - putative		55501	11												1	1			1				1		1					1	1					1									1	1	1
Human	Q9BU23	2 - putative		91289	11											1	1									1	1				1	1					1	1		1							1	1
Human	P10253	2 - putative		2548	10							1					1				1											1					1	1		1				1			1	1
Human	Q68CP4	2 - putative		138050	10			1									1	1			1																1	1		1								1	1
Human	Q4ZIN3	2 - putative		91304	9											1					1											1					1	1		1								1	1
Human	O94901	2 - putative		23353	8									1																	1	1			1		1	1		1									1
Human	Q96AQ6	2 - putative		57326	8																										1	1					1	1		1							1	1
Human	O60931	2 - putative		1497	7											1							1	1	1					1															1
Human	Q7Z2K6	2 - putative		79956	6												1	1						1							1	1						1
Human	O43909	2 - putative		2137	6										1		1																				1	1		1									1
Human	Q9Y6A1	2 - putative		10585	6												1				1																1	1		1									1
Human	Q6AZY7	2 - putative		51435	6								1				1				1															1											1	1
Human	Q8NHS3	2 - putative		256471	5												1				1										1	1																	1
Human	Q96G23	2 - putative		29956	5											1																						1		1							1		1
Human	Q75T13	2 - putative		80055	5																										1	1					1	1		1
Human	Q14643	2 - putative		3708	4											1	1													1																			1
Human	Q9Y2C2	2 - putative		10090	4												1	1														1																	1
Human	Q8WXF7	2 - putative		51062	4				1													1										1										1
Human	Q8NCW6	2 - putative		63917	4																						1																				1		1
Human	P49641	2 - putative		4122	4												1															1																	1
Human	P09110	2 - putative		30	3								1										1																	1
Human	Q14573	2 - putative		3710	3													1						1																									1
Human	Q9NYU2	2 - putative		56886	3																						1										1	1
Human	Q8WWZ7	2 - putative		23461	3																					1					1	1
Human	Q9UKY4	2 - putative		29954	3																1																	1											1
Human	P38435	2 - putative		2677	3													1														1																	1
Human	Q9UNW1	2 - putative		9562	3																																1	1										1
Human	Q9Y274	2 - putative		10402	3												1														1	1
Human	O95427	2 - putative		23556	3												1															1																1
Human	Q96G97	2 - putative		26580	3																1																			1									1
Human	Q8NC56	2 - putative		221496	3																																	1		1									1
Human	Q9UNP4	2 - putative		8869	2																											1						1
Human	Q9NQZ7	2 - putative		57089	2												1																																1
Human	Q9BVX2	2 - putative		79022	2												1																																1
Human	Q8WVQ1	2 - putative		124583	2																											1																	1
Human	P51690	2 - putative		415	2																																	1											1
Human	Q13286	2 - putative		1201	2																1	1
Human	O75503	2 - putative		1203	2																																											1	1
Human	Q13563	2 - putative		5311	2																																											1	1
Human	Q5H8A4	2 - putative		54872	2																																												1
Human	Q3V5L5	2 - putative		146664	2																																												1
Human	Q6ZMG9	2 - putative		253782	2																																1			1
Human	Q8IVB4	2 - putative		285195	2																								1																		1
Human	Q5JTV8	2 - putative		26092	2											1														1
Human	Q8IY34	2 - putative		51296	1																									1
Human	Q9NPC4	2 - putative		53947	1																																												1
Human	P51797	2 - putative		1185	1																											1
Human	Q99941	2 - putative		1388	1																																												1
Human	P09172	2 - putative		1621	1																1
Human	P28845	2 - putative		3290	1			1
Human	P17405	2 - putative		6609	1																																												1
Human	Q7LGC8	2 - putative		9469	1																																												1
Human	Q8IY17	2 - putative		10908	1																																												1
Human	Q9H5J4	2 - putative		79071	1																																	1
Human	P19440	3 - unspecific	CD224	2678	24	1	1					1	1	1		1		1	1			1	1	1	1	1	1			1		1	1	1	1			1										1	1
Human	P30414	3 - unspecific		4820	1		1
Human	P60709	3 - unspecific		60	44	1	1	1	1	1	1	1	1	1	1	1	1	1	1		1	1	1	1	1	1	1		1	1	1	1	1	1	1	1	1	1	1	1	1	1	1		1	1	1	1	1
Human	Q9Y4L1	3 - unspecific		10525	40		1	1	1	1	1	1	1	1	1	1	1	1			1	1	1	1	1	1	1		1	1	1	1	1	1	1	1	1	1	1	1	1	1				1	1	1	1
Human	P68104	3 - unspecific		1915	34		1	1		1	1	1	1	1	1	1	1	1			1		1	1	1	1	1	1		1	1	1		1	1	1	1	1		1						1	1	1	1
Human	P07996	3 - unspecific		7057	33	1	1		1		1	1	1	1	1	1		1		1	1		1	1		1	1	1			1	1			1	1	1			1	1	1	1	1			1	1	1
Human	P08670	3 - unspecific		7431	32	1	1	1		1		1			1	1	1	1			1		1	1	1	1	1		1	1	1	1		1	1	1	1	1		1		1	1				1	1	1
Human	P14618	3 - unspecific		5315	32	1	1			1	1	1	1	1	1	1	1	1			1		1	1	1	1	1				1	1			1	1	1	1		1			1			1	1	1	1
Human	P14625	3 - unspecific		7184	31		1	1			1		1		1	1	1	1			1	1	1	1	1	1	1		1	1	1	1	1		1	1	1	1		1		1					1	1	1
Human	Q8NBJ4	3 - unspecific		51280	31		1			1	1		1		1		1	1			1	1	1	1	1	1	1				1	1	1		1	1	1	1		1	1		1	1			1	1	1
Human	P10809	3 - unspecific		3329	29		1			1	1				1	1	1	1	1		1		1	1	1	1	1		1	1	1	1			1	1	1	1		1			1			1	1		1
Human	P07437	3 - unspecific		203068	27		1		1	1					1	1	1	1			1		1	1		1	1			1	1	1			1		1	1		1			1		1	1	1	1	1
Human	Q7LGA3	3 - unspecific		9653	26		1		1				1	1		1	1	1			1	1	1	1		1	1			1	1	1	1				1	1		1					1		1	1	1
Human	P07737	3 - unspecific		5216	24		1			1		1			1		1	1			1	1	1	1		1	1				1	1		1			1	1		1						1	1	1	1
Human	O60568	3 - unspecific		8985	24		1	1			1		1		1		1	1			1						1	1			1	1					1	1		1	1	1	1	1			1	1	1
Human	P11142	3 - unspecific		3312	23		1			1		1					1	1			1		1	1	1	1	1				1			1	1		1	1		1			1			1	1	1	1
Human	Q07020	3 - unspecific		6141	23		1		1		1				1		1	1			1		1		1	1	1				1	1		1	1		1	1		1			1			1	1
Human	P39023	3 - unspecific		6122	21		1		1		1						1	1			1		1	1		1	1			1	1	1			1			1		1			1				1		1
Human	P05387	3 - unspecific		6181	21		1				1			1				1			1	1	1	1	1	1	1			1					1					1			1			1	1	1	1
Human	P35579	3 - unspecific		4627	20		1			1														1		1	1		1	1	1	1		1	1	1	1	1		1			1			1	1		1
Human	P23284	3 - unspecific		5479	20		1				1				1	1	1	1			1		1			1	1					1			1		1	1		1							1	1	1
Human	P60174	3 - unspecific		7167	19		1			1	1	1		1				1	1				1	1		1								1		1	1	1		1					1	1	1		1
Human	P04062	3 - unspecific		2629	19		1					1	1			1	1	1			1					1	1				1	1					1	1		1		1					1	1	1
Human	Q9NR09	3 - unspecific		57448	19		1		1					1		1			1		1		1	1	1					1			1				1				1		1	1		1			1
Human	P46776	3 - unspecific		6157	18		1				1	1					1	1			1		1			1	1				1	1		1	1		1	1		1							1
Human	Q00610	3 - unspecific		1213	18		1														1		1	1		1	1			1	1	1			1	1	1	1		1						1	1
Human	P08238	3 - unspecific		3326	18		1			1	1	1			1		1	1			1		1				1							1	1		1	1		1							1	1	1
Human	Q15293	3 - unspecific		5954	18		1				1				1	1					1		1			1	1			1		1					1	1		1							1	1	1
Human	O43707	3 - unspecific		81	17		1			1	1							1						1							1	1		1	1		1	1		1			1			1	1
Human	Q99623	3 - unspecific		11331	17		1				1			1									1		1		1		1			1			1		1	1		1						1	1		1
Human	P22695	3 - unspecific		7385	17		1		1						1						1	1				1	1		1		1	1		1			1	1		1							1
Human	Q00839	3 - unspecific		3192	15		1		1		1						1						1	1	1	1				1				1			1	1		1						1			1
Human	P45880	3 - unspecific		7417	15		1			1	1						1				1		1			1	1					1					1	1		1							1		1
Human	Q08AG5	3 - unspecific		284391	15		1						1										1	1		1	1					1						1			1		1	1			1	1	1
Human	Q9Y222	3 - unspecific		9988	14	1	1			1			1													1	1	1			1	1											1				1		1
Human	P02545	3 - unspecific		4000	14		1	1		1					1			1								1					1	1			1		1	1		1									1
Human	P13674	3 - unspecific		5033	14		1								1		1	1			1											1				1	1	1		1		1					1	1	1
Human	P62910	3 - unspecific		6161	13		1				1										1		1	1	1	1	1			1				1	1		1										1
Human	P14314	3 - unspecific		5589	12		1				1						1				1		1			1	1							1	1												1		1
Human	P61513	3 - unspecific		6168	12		1									1	1					1	1	1		1	1								1											1	1
Human	P27348	3 - unspecific		10971	11		1					1					1							1						1						1	1	1		1						1			1
Human	P49184	3 - unspecific		1774	9	1	1						1												1	1					1	1				1
Human	P68371	3 - unspecific		10383	8		1			1																					1				1		1	1		1							1
Human	P84103	3 - unspecific		6428	7		1										1														1				1		1	1		1
Human	Q9UKA4	3 - unspecific		11215	7		1						1				1									1										1													1
Human	P29966	3 - unspecific		4082	5		1																								1																1		1
Human	Q12931	3 - unspecific		10131	5		1					1		1				1			1
Human	P14649	3 - unspecific		140465	5		1			1																					1									1
Human	P29692	3 - unspecific		1936	4		1																														1	1		1
Human	Q9BUF5	3 - unspecific		84617	4		1																														1	1		1
Human	Q8IWU5	3 - unspecific		55959	4		1						1																									1											1
Human	Q9UK39	3 - unspecific		25819	1		1
Human	A6NGU5	3 - unspecific		2679	21	1			1				1	1		1	1				1	1		1	1	1	1			1		1	1		1			1								1	1	1	1
Human	Q15165	3 - unspecific		5445	18			1					1		1		1	1					1	1							1	1			1		1	1		1							1	1	1
Human	P36269	3 - unspecific		2687	14			1					1							1						1	1						1			1					1		1	1			1		1
Human	Q68CQ7	3 - unspecific		55830	9								1				1									1	1									1	1			1							1		1
Human	Q92478	3 - unspecific		9976	9								1										1	1		1				1				1												1	1		1
Human	Q4G148	3 - unspecific		283464	8												1	1			1											1					1	1										1	1
Human	Q9UJ14	3 - unspecific		2686	3																																1	1		1
Human	Q16853	3 - unspecific		8639	3			1																					1		1
Human	Q9BVA6	3 - unspecific		11153	1																																												1
Human	O60243	3 - unspecific		9394	1																1
Human	P04406	3 - unspecific		2597	28					1		1		1	1	1	1	1			1		1	1	1	1	1			1				1	1	1	1	1		1			1	1	1	1	1	1	1
Human	Q02809	3 - unspecific		5351	23			1					1		1	1	1	1			1			1		1	1					1	1		1	1	1	1		1	1	1					1	1	1
Human	Q07343	3 - unspecific		5142	19				1				1	1		1					1		1	1		1			1	1	1	1				1									1	1	1		1
Human	Q96AY3	3 - unspecific		60681	19								1		1		1	1			1					1	1				1	1			1		1	1		1		1					1	1	1
Human	P50454	3 - unspecific		871	18			1		1					1		1	1								1	1					1	1				1	1		1		1					1	1	1
Human	P08236	3 - unspecific		2990	18			1	1				1			1	1									1	1				1	1	1				1	1		1		1					1	1	1
Human	Q9UHG3	3 - unspecific		51449	18			1					1				1	1			1						1		1	1	1	1	1				1	1		1							1	1	1
Human	O00469	3 - unspecific		5352	17			1					1		1		1	1			1											1				1	1	1		1	1	1					1	1	1
Human	P62266	3 - unspecific		6228	13						1						1						1	1		1	1			1				1	1			1		1								1
Human	P12956	3 - unspecific		2547	13												1				1			1		1	1					1		1	1		1	1		1							1
Human	Q9UQ80	3 - unspecific		5036	13											1	1	1								1	1							1	1			1		1			1				1	1
Human	P18077	3 - unspecific		6165	13				1		1					1			1				1		1	1	1			1													1				1
Human	P53634	3 - unspecific		1075	13			1									1				1		1	1								1	1				1	1		1		1						1	1
Human	Q8NBJ5	3 - unspecific		79709	13												1	1			1										1	1					1	1		1		1					1	1	1
Human	P46779	3 - unspecific		6158	12						1					1	1						1	1		1	1							1	1											1	1
Human	O00754	3 - unspecific		4125	12									1			1		1				1	1							1	1					1	1		1								1	1
Human	P42766	3 - unspecific		11224	12											1		1					1	1		1	1				1						1	1		1			1				1
Human	Q13510	3 - unspecific		427	12			1									1				1	1									1	1					1	1		1		1						1	1
Human	Q6PIU2	3 - unspecific		57552	11						1		1	1	1																1	1					1	1		1								1	1
Human	O60512	3 - unspecific		8703	11												1				1					1	1					1					1	1					1				1		1
Human	Q6P179	3 - unspecific		64167	10							1			1											1	1			1				1						1		1					1		1
Human	O15460	3 - unspecific		8974	10																					1						1				1	1	1		1		1					1	1	1
Human	P50991	3 - unspecific		10575	10			1			1				1		1	1						1										1				1		1			1
Human	P07900	3 - unspecific		3320	9							1					1							1	1									1	1		1	1		1
Human	P48735	3 - unspecific		3418	9					1											1		1								1	1		1			1			1							1
Human	P30533	3 - unspecific		4043	9								1				1															1					1	1		1							1		1
Human	O43505	3 - unspecific		11041	9												1									1	1					1					1			1							1		1
Human	P06865	3 - unspecific		3073	9												1														1	1					1	1		1								1	1
Human	Q92791	3 - unspecific		10609	9										1		1	1			1																1	1				1						1	1
Human	P32969	3 - unspecific		6133	8																1					1									1	1	1	1		1									1
Human	P46778	3 - unspecific		6144	8																		1	1		1				1					1			1		1							1
Human	P84098	3 - unspecific		6143	8												1				1		1			1	1								1												1
Human	P07711	3 - unspecific		1514	8												1				1										1	1					1											1	1
Human	P15586	3 - unspecific		2799	8													1													1	1					1	1		1								1	1
Human	P07602	3 - unspecific		5660	8													1													1	1					1	1		1								1	1
Human	Q9Y644	3 - unspecific		5986	8										1		1	1									1					1						1										1
Human	Q9UQ53	3 - unspecific		11282	8												1				1											1								1							1	1	1
Human	Q96HE7	3 - unspecific		30001	8											1	1						1									1						1		1								1	1
Human	Q7Z4H8	3 - unspecific		143888	8												1				1																1	1		1							1	1	1
Human	Q8NBK3	3 - unspecific		285362	8												1				1											1					1	1				1						1
Human	P62244	3 - unspecific		6210	7											1							1			1									1		1	1		1
Human	P62316	3 - unspecific		6633	7						1			1									1							1								1					1			1
Human	P48723	3 - unspecific		6782	7												1																				1	1		1		1						1	1
Human	Q9GZX3	3 - unspecific		4166	7				1						1															1		1					1		1
Human	P16278	3 - unspecific		2720	7																1										1	1					1	1		1								1
Human	Q96RQ1	3 - unspecific		51290	7																											1					1	1		1							1	1	1
Human	Q9Y680	3 - unspecific		51661	7																										1	1					1	1		1								1	1
Human	O75477	3 - unspecific		10613	6										1		1									1											1	1											1
Human	O95302	3 - unspecific		11328	6																											1					1	1		1							1	1
Human	Q8NHP8	3 - unspecific		196463	6																											1					1	1		1								1	1
Human	O14773	3 - unspecific		1200	6																									1							1	1		1							1	1
Human	P38571	3 - unspecific		3988	6																		1	1													1	1		1									1
Human	P54802	3 - unspecific		4669	6												1														1	1					1	1											1
Human	P35442	3 - unspecific		7058	6																											1					1					1		1					1
Human	O94923	3 - unspecific		26035	6												1				1											1					1	1											1
Human	O14657	3 - unspecific		27348	6												1																				1	1		1								1	1
Human	Q9H173	3 - unspecific		64374	6																																1	1		1		1						1	1
Human	P18621	3 - unspecific		6139	5																		1			1											1	1		1
Human	P07686	3 - unspecific		3074	5																										1	1					1	1		1
Human	P05164	3 - unspecific		4353	5			1	1										1														1				1
Human	P50897	3 - unspecific		5538	5													1																				1		1								1	1
Human	O00567	3 - unspecific		10528	5																1				1							1								1									1
Human	Q9Y2G5	3 - unspecific		23275	5																																1	1		1								1	1
Human	Q96AE7	3 - unspecific		55761	5												1																				1	1										1	1
Human	Q99538	3 - unspecific		5641	5																																1	1		1								1	1
Human	Q9NZ08	3 - unspecific		51752	5																																1	1		1								1	1
Human	O76021	3 - unspecific		26156	4													1			1																1
Human	P08246	3 - unspecific		1991	4			1		1									1
Human	P37802	3 - unspecific		8407	4							1						1																1						1
Human	P01876	3 - unspecific		3493	4			1		1		1																															1
Human	O14556	3 - unspecific		26330	4			1									1											1			1
Human	Q9H1A3	3 - unspecific		51108	4																1																			1								1	1
Human	Q9Y6N5	3 - unspecific		58472	4								1						1				1	1
Human	Q9UMR5	3 - unspecific		9374	4																											1					1	1		1
Human	Q9NPF2	3 - unspecific		50515	4												1															1	1																1
Human	Q9BZQ6	3 - unspecific		80267	4																																1	1										1	1
Human	P10619	3 - unspecific		5476	4																																1	1		1								1
Human	Q7Z7M9	3 - unspecific		11227	4								1	1																						1
Human	Q8IWU6	3 - unspecific		23213	4			1																													1	1					1
Human	P01733	3 - unspecific		28577	4							1						1				1							1
Human	Q9P2E5	3 - unspecific		54480	4													1																			1	1		1
Human	Q86YB8	3 - unspecific		56605	4												1																									1						1	1
Human	Q15366	3 - unspecific		5094	3																																1	1		1
Human	Q9UKM9	3 - unspecific		22913	3																		1			1
Human	A2BFH1	3 - unspecific		164022	3																1													1		1
Human	Q9NS25	3 - unspecific		728695	3										1								1									1
Human	Q5NDL2	3 - unspecific		285203	3											1																						1											1
Human	P15848	3 - unspecific		411	3																										1	1					1
Human	P06280	3 - unspecific		2717	3												1															1					1
Human	Q15818	3 - unspecific		4884	3								1				1																														1
Human	P35354	3 - unspecific		5743	3																					1	1													1
Human	P04350	3 - unspecific		10382	3														1		1																									1
Human	Q5T4B2	3 - unspecific		51148	3																																1	1		1
Human	Q9H3G5	3 - unspecific		54504	3																											1					1	1
Human	Q9H497	3 - unspecific		64222	3																1																1	1
Human	P57721	3 - unspecific		54039	3																1										1									1
Human	Q96A58	3 - unspecific		85004	2	1		1
Human	P49588	3 - unspecific		16	2																			1			1
Human	P17050	3 - unspecific		4668	2																											1					1
Human	P68366	3 - unspecific		7277	2																																1	1
Human	Q8IYK4	3 - unspecific		23127	2																																1												1
Human	Q8N543	3 - unspecific		55239	2																																										1		1
Human	Q9GZY0	3 - unspecific		56001	2																																	1											1
Human	P43235	3 - unspecific		1513	2																										1	1
Human	O00116	3 - unspecific		8540	2																					1																					1
Human	O43286	3 - unspecific		9334	2																																1	1
Human	Q02083	3 - unspecific		27163	2																																1	1
Human	Q9NS84	3 - unspecific		56548	2																																										1		1
Human	Q96D15	3 - unspecific		57333	2																																1			1
Human	Q495W5	3 - unspecific		170384	2																																1	1
Human	Q8IW19	3 - unspecific		200558	2									1																															1
Human	Q70JA7	3 - unspecific		337876	2																																1												1
Human	P26599	3 - unspecific		5725	2												1																				1
Human	Q9NWM8	3 - unspecific		55033	1																											1
Human	Q9NYU1	3 - unspecific		55757	1																											1
Human	Q96CB8	3 - unspecific		57117	1																																1
Human	Q8IVL1	3 - unspecific		89797	1									1
Human	Q8NDV1	3 - unspecific		256435	1																																												1
Human	A8MYG8	3 - unspecific		100132257	1									1
Human	P01737	3 - unspecific		0	1																	1
Human	P04435	3 - unspecific		0	1							1
Human	P46100	3 - unspecific		546	1																	1
Human	P23141	3 - unspecific		1066	1			1
Human	O60911	3 - unspecific		1515	1																																	1
Human	O75072	3 - unspecific		2218	1																																												1
Human	P34059	3 - unspecific		2588	1																																1
Human	P20718	3 - unspecific		2999	1																													1
Human	O00587	3 - unspecific		4242	1																																									1
Human	P49746	3 - unspecific		7059	1																																1
Human	Q92187	3 - unspecific		7903	1																																1
Human	P49915	3 - unspecific		8833	1																														1
Human	Q6IS24	3 - unspecific		64409	1
Human	Q9H1Z4	3 - unspecific		64743	1					1
Human	Q6Y288	3 - unspecific		145173	1																																	1
Human	Q5D862	3 - unspecific		388698	1																									1
Human	P11678	3 - unspecific		8288	1																												1
Human	P55210	3 - unspecific		840	1																																						1
Human	O75063	3 - unspecific		9917	1																																												1
Human	Q99550	3 - unspecific		10198	1			1
Human	Q9Y520	3 - unspecific		23215	1																																											1
Human	Q9Y5P6	3 - unspecific		29925	1																							1
Human	Q9NQ48	3 - unspecific		54585	1																1
Human	Q7Z2W4	3 - unspecific		56829	1																					1
Human	P04220	3 - unspecific		0	1									1
[truncated: 3 more columns]

## Sheet: Table_C
organisme	ID_link	CSPA category	Protein count	159-2 EB	159-2 ES	159-2 NP	2D4-iPS	Adipocytes subcutaneous	Astroglia	C2C12	D3_ES	E14Tg2a	GL261	J1_EB	J1_neurons	J1_NP	J774.2	Macrophages (BM-der.)	Min6	MSC80	Neural stem cells (forebrain)	Neural stem cells (spinal cord)	Neural stem cells (SVZ)	R1_defNCS 2°	R1_EB	R1_ES	R1_NP_4h	R1_primNCS 1°	SMA560	Spleenocytes	TH-0	TH-1	TH-17	TTF-1_iPS
mouse	P09055	1 - high confidence	31	1	1	1	1	1	1	1	1	1	1	1	1	1	1	1	1	1	1	1	1	1	1	1	1	1	1	1	1	1	1	1
mouse	P10852	1 - high confidence	31	1	1	1	1	1	1	1	1	1	1	1	1	1	1	1	1	1	1	1	1	1	1	1	1	1	1	1	1	1	1	1
mouse	P15208	1 - high confidence	31	1	1	1	1	1	1	1	1	1	1	1	1	1	1	1	1	1	1	1	1	1	1	1	1	1	1	1	1	1	1	1
mouse	P18572	1 - high confidence	31	1	1	1	1	1	1	1	1	1	1	1	1	1	1	1	1	1	1	1	1	1	1	1	1	1	1	1	1	1	1	1
mouse	P24668	1 - high confidence	31	1	1	1	1	1	1	1	1	1	1	1	1	1	1	1	1	1	1	1	1	1	1	1	1	1	1	1	1	1	1	1
mouse	P97300	1 - high confidence	31	1	1	1	1	1	1	1	1	1	1	1	1	1	1	1	1	1	1	1	1	1	1	1	1	1	1	1	1	1	1	1
mouse	Q8C129	1 - high confidence	31	1	1	1	1	1	1	1	1	1	1	1	1	1	1	1	1	1	1	1	1	1	1	1	1	1	1	1	1	1	1	1
mouse	Q9ET30	1 - high confidence	31	1	1	1	1	1	1	1	1	1	1	1	1	1	1	1	1	1	1	1	1	1	1	1	1	1	1	1	1	1	1	1
mouse	P17809	1 - high confidence	30	1	1	1	1		1	1	1	1	1	1	1	1	1	1	1	1	1	1	1	1	1	1	1	1	1	1	1	1	1	1
mouse	Q75N73	1 - high confidence	30	1	1	1	1		1	1	1	1	1	1	1	1	1	1	1	1	1	1	1	1	1	1	1	1	1	1	1	1	1	1
mouse	Q8BXN9	1 - high confidence	30	1	1	1	1	1	1	1	1	1	1	1	1	1	1	1	1	1	1	1	1	1	1	1	1	1	1	1		1	1	1
mouse	P04925	1 - high confidence	30	1	1	1	1	1	1	1	1	1	1	1	1	1	1	1	1	1	1	1	1	1	1	1		1	1	1	1	1	1	1
mouse	P43406	1 - high confidence	30	1	1	1	1	1	1	1	1	1	1	1	1	1	1	1	1	1	1	1	1	1	1	1		1	1	1	1	1	1	1
mouse	P97370	1 - high confidence	30	1	1	1	1	1	1	1	1	1	1	1	1	1	1	1	1	1	1	1	1	1	1	1		1	1	1	1	1	1	1
mouse	P21995	1 - high confidence	29	1	1	1	1		1	1	1	1	1	1	1	1	1	1	1		1	1	1	1	1	1	1	1	1	1	1	1	1	1
mouse	P70206	1 - high confidence	29	1	1	1	1		1	1	1	1	1	1	1	1	1	1		1	1	1	1	1	1	1	1	1	1	1	1	1	1	1
mouse	Q9WVL3	1 - high confidence	29	1	1	1	1		1	1	1	1	1	1	1	1	1	1		1	1	1	1	1	1	1	1	1	1	1	1	1	1	1
mouse	Q64455	1 - high confidence	29	1	1	1	1	1	1		1	1	1	1	1	1	1	1	1	1	1	1	1	1	1	1		1	1	1	1	1	1	1
mouse	Q6P9J9	1 - high confidence	29	1	1	1	1	1	1	1	1	1	1	1	1		1	1	1	1	1	1	1	1	1	1		1	1	1	1	1	1	1
mouse	Q8C145	1 - high confidence	29	1	1	1	1		1	1	1	1	1	1	1	1	1	1	1	1	1	1	1	1	1	1		1	1	1	1	1	1	1
mouse	Q91ZX7	1 - high confidence	29	1	1	1	1	1	1	1	1	1	1	1	1	1	1	1	1	1	1	1	1	1	1	1		1	1	1	1		1	1
mouse	P11438	1 - high confidence	28	1	1	1	1	1	1	1	1	1	1	1	1	1		1	1		1	1	1	1	1	1	1	1	1		1	1	1	1
mouse	P13597	1 - high confidence	28	1	1	1	1	1	1		1	1	1	1	1	1	1	1	1	1		1		1	1	1	1	1	1	1	1	1	1	1
mouse	Q61735	1 - high confidence	28			1	1	1	1		1	1	1	1	1	1	1	1	1	1	1	1	1	1	1	1	1	1	1	1	1	1	1	1
mouse	Q8R5M8	1 - high confidence	28	1	1	1	1		1	1	1	1	1	1	1	1	1	1	1	1	1	1	1	1	1	1	1	1	1	1	1			1
mouse	P17047	1 - high confidence	28	1	1	1	1	1	1	1	1	1	1	1	1		1	1	1	1	1	1	1	1	1	1		1	1	1		1	1	1
mouse	P52592	1 - high confidence	28	1	1	1	1	1	1	1	1	1	1	1	1	1	1	1	1	1	1	1	1	1	1	1		1	1			1	1	1
mouse	Q61490	1 - high confidence	28	1		1	1	1	1	1	1	1	1	1	1	1	1	1	1	1	1	1	1	1	1	1			1	1	1	1	1	1
mouse	O35598	1 - high confidence	27	1	1	1		1	1		1	1	1	1	1	1	1	1	1	1	1	1	1	1	1	1	1	1	1	1	1	1
mouse	P14094	1 - high confidence	27	1	1	1	1		1	1	1	1	1	1	1	1			1	1	1	1	1	1	1	1	1	1	1	1	1	1		1
mouse	P24807	1 - high confidence	27	1	1	1	1	1	1	1	1	1	1	1	1	1			1	1	1	1		1	1	1	1	1		1	1	1	1	1
mouse	Q8BTY2	1 - high confidence	27	1	1	1	1		1		1	1	1	1	1	1	1		1	1	1	1	1	1	1	1	1	1	1	1		1	1	1
mouse	Q9JIM1	1 - high confidence	27	1	1	1	1		1		1	1	1	1	1	1	1		1	1	1	1	1	1	1	1	1	1	1		1	1	1	1
mouse	Q61739	1 - high confidence	27	1	1	1	1	1	1		1	1	1	1	1		1	1	1	1	1	1	1	1	1	1		1	1		1	1	1	1
mouse	Q64735	1 - high confidence	27		1	1	1	1	1		1	1	1	1	1	1	1		1	1	1	1	1	1	1	1		1	1	1	1	1	1	1
mouse	Q8R2Q8	1 - high confidence	27	1	1	1	1	1	1		1	1	1	1	1		1	1	1		1	1	1	1	1	1		1	1	1	1	1	1	1
mouse	P11276	1 - high confidence	26	1	1	1	1	1	1	1	1	1	1	1	1	1	1			1		1	1	1	1	1	1	1	1		1		1	1
mouse	Q8C7X2	1 - high confidence	26	1	1	1	1	1	1		1	1	1	1	1	1	1		1		1	1	1	1	1	1	1	1	1			1	1	1
mouse	Q4PZA2	1 - high confidence	26	1	1	1	1		1	1	1	1	1	1	1		1	1	1		1	1	1	1	1	1		1	1	1	1	1		1
mouse	Q62351	1 - high confidence	26	1	1	1	1		1		1	1	1	1	1	1	1	1	1		1	1	1	1	1	1		1	1	1		1	1	1
mouse	O88792	1 - high confidence	25	1	1	1	1	1	1	1	1	1	1	1	1	1	1	1	1					1	1	1	1	1		1	1	1		1
mouse	P13595	1 - high confidence	25	1	1	1	1		1	1	1	1	1	1	1	1			1	1	1	1	1	1	1	1	1	1	1	1				1
mouse	P97797	1 - high confidence	25	1		1	1	1	1		1		1	1	1	1	1	1	1	1	1	1	1	1	1	1	1	1		1	1			1
mouse	Q60738	1 - high confidence	25	1	1	1	1		1		1	1	1	1	1	1	1		1	1	1	1	1	1	1	1	1	1	1			1		1
mouse	Q62470	1 - high confidence	25	1	1	1	1	1	1	1	1	1	1	1	1	1			1	1		1		1	1	1	1	1	1			1	1	1
mouse	Q8BKG3	1 - high confidence	25	1	1	1	1		1	1	1	1	1	1	1	1					1	1	1	1	1	1	1	1	1		1	1	1	1
mouse	P11627	1 - high confidence	25	1	1	1	1	1	1		1	1	1	1	1	1	1	1	1	1					1	1		1	1	1	1	1	1	1
mouse	Q60751	1 - high confidence	25	1	1	1	1		1	1	1	1	1	1	1	1			1	1	1	1	1	1	1	1		1	1			1	1	1
mouse	Q6P5F6	1 - high confidence	25	1	1	1	1		1	1	1	1	1	1	1			1	1	1	1	1	1		1	1		1	1		1	1	1	1
mouse	Q924N4	1 - high confidence	25	1	1	1	1	1	1		1	1	1	1	1		1	1	1	1				1	1	1		1	1	1	1	1	1	1
mouse	P54763	1 - high confidence	24	1	1	1	1		1	1	1	1		1	1	1			1	1	1	1	1	1	1	1	1	1	1			1		1
mouse	Q8VE98	1 - high confidence	24	1	1	1	1		1	1	1	1	1	1	1	1			1	1	1	1	1	1	1	1	1	1	1					1
mouse	O08532	1 - high confidence	24	1	1	1	1	1	1	1	1	1		1	1	1			1	1	1	1	1	1	1	1		1	1		1			1
mouse	P57716	1 - high confidence	24	1	1	1	1		1		1	1	1	1	1	1		1	1		1	1	1	1	1	1		1	1			1	1	1
mouse	Q9WV91	1 - high confidence	24	1	1	1	1	1	1	1	1	1	1	1	1						1	1	1	1	1	1		1	1		1	1	1	1
mouse	Q9Z0M6	1 - high confidence	24	1	1	1	1		1	1	1	1	1	1	1					1	1	1		1	1	1		1	1	1	1	1	1	1
mouse	P02468	1 - high confidence	23	1	1	1	1	1	1		1	1	1	1	1	1				1	1	1	1	1	1	1	1	1	1					1
mouse	P97798	1 - high confidence	23	1	1	1	1		1	1	1	1	1	1	1	1			1	1	1	1	1		1	1	1	1	1					1
mouse	Q3TEW6	1 - high confidence	23	1	1	1	1	1	1		1	1	1	1	1	1			1		1	1	1	1	1	1	1	1	1					1
mouse	Q61543	1 - high confidence	23		1		1		1	1	1	1	1	1	1	1			1		1	1	1	1	1	1	1	1	1			1	1	1
mouse	P01831	1 - high confidence	23	1	1		1	1	1		1	1	1	1	1				1		1	1	1	1	1	1		1		1	1	1	1	1
mouse	P06802	1 - high confidence	23			1	1		1	1	1		1	1	1	1		1	1		1	1	1		1	1		1	1	1	1	1	1	1
mouse	P11688	1 - high confidence	23	1	1	1	1		1	1	1	1	1	1	1		1	1		1	1	1	1	1	1	1		1	1					1
mouse	Q62313	1 - high confidence	23	1	1	1		1	1		1	1	1	1	1	1			1		1	1	1	1	1	1		1	1			1	1	1
mouse	Q6PEM8	1 - high confidence	23	1	1	1	1		1		1	1	1	1	1	1	1	1	1		1	1	1	1	1	1		1	1					1
mouse	Q9JHJ3	1 - high confidence	23	1	1	1	1		1		1	1		1	1				1	1	1	1	1	1	1	1		1		1	1	1	1	1
mouse	Q9JKF6	1 - high confidence	23	1	1	1	1		1	1	1	1		1	1	1	1		1	1	1	1	1	1	1	1		1	1					1
mouse	Q9Z1M0	1 - high confidence	23		1		1	1	1	1	1	1	1	1			1	1		1	1	1	1	1		1		1	1	1	1	1	1
mouse	O09126	1 - high confidence	22	1	1	1	1		1		1	1	1	1	1		1	1						1	1	1		1	1	1	1	1	1	1
mouse	P01901	1 - high confidence	22	1	1	1	1	1	1		1	1	1	1	1			1	1			1				1		1	1	1	1	1	1	1
mouse	P15379	1 - high confidence	22				1		1	1	1		1	1	1		1	1	1	1	1	1	1		1	1			1	1	1	1	1	1
mouse	P32507	1 - high confidence	22	1	1	1			1		1	1	1	1	1	1			1	1	1	1	1	1	1	1		1	1			1		1
mouse	P54761	1 - high confidence	22	1	1	1	1		1	1	1	1	1	1	1	1				1	1	1	1	1	1	1		1	1					1
mouse	Q03145	1 - high confidence	22	1	1	1	1		1	1	1	1	1	1	1	1			1	1	1	1		1	1	1		1	1					1
mouse	Q07113	1 - high confidence	22	1	1	1	1		1		1	1		1	1				1	1	1	1	1	1	1	1		1	1			1	1	1
mouse	Q08481	1 - high confidence	22	1	1	1	1	1	1		1	1		1	1	1	1			1				1	1	1		1		1	1	1	1	1
mouse	Q91YQ5	1 - high confidence	22		1		1		1	1	1	1	1	1	1		1		1	1	1	1	1	1	1	1		1		1		1		1
mouse	Q9R1W5	1 - high confidence	22	1		1		1	1	1		1	1	1	1			1			1	1	1	1	1	1		1	1	1	1	1	1
mouse	P09242	1 - high confidence	21	1	1	1	1	1	1		1	1		1	1	1					1	1	1	1	1	1	1	1		1				1
mouse	O35316	1 - high confidence	21	1	1		1		1	1	1	1	1	1			1	1	1	1		1		1	1	1				1		1	1	1
mouse	O89001	1 - high confidence	21	1	1	1					1		1	1	1	1	1		1	1	1	1	1	1	1	1		1	1				1	1
mouse	P14231	1 - high confidence	21	1	1	1		1	1		1	1	1	1	1				1		1	1	1	1	1	1		1	1	1				1
mouse	P15116	1 - high confidence	21			1	1		1	1	1		1	1	1	1		1	1	1	1	1	1	1	1	1		1	1					1
mouse	P16092	1 - high confidence	21	1	1	1	1		1	1	1	1	1	1	1	1				1	1	1	1	1	1	1		1	1
mouse	P20352	1 - high confidence	21	1		1	1		1	1	1	1	1	1	1	1				1	1	1	1		1	1		1	1			1		1
mouse	Q60767	1 - high confidence	21	1	1	1	1		1		1	1	1	1		1	1							1	1	1		1	1	1	1	1	1	1
mouse	Q61503	1 - high confidence	21	1	1	1	1	1	1		1	1	1	1					1		1			1	1	1		1	1	1	1		1	1
mouse	Q6P5F7	1 - high confidence	21	1	1	1			1		1	1	1	1	1				1	1	1	1	1	1	1	1			1		1	1		1
mouse	Q8CJH3	1 - high confidence	21	1	1	1	1		1		1	1	1	1	1	1			1	1	1	1	1	1	1	1		1						1
mouse	Q99MR3	1 - high confidence	21	1	1	1	1		1		1	1			1	1	1		1		1	1	1		1	1		1			1	1	1	1
mouse	Q9D659	1 - high confidence	21	1	1			1	1	1	1	1	1			1	1			1	1	1	1	1	1			1	1		1	1	1
mouse	Q9WU60	1 - high confidence	21		1	1	1		1			1	1	1	1		1	1	1	1	1	1	1	1		1		1	1			1		1
mouse	O35604	1 - high confidence	20			1	1	1	1		1			1	1				1	1	1	1	1	1	1	1	1	1	1			1		1
mouse	P02469	1 - high confidence	20	1	1	1	1	1	1		1	1	1	1						1	1	1	1	1	1	1		1	1					1
mouse	P97333	1 - high confidence	20			1	1		1	1	1		1	1	1		1	1		1	1	1		1		1		1	1		1	1		1
mouse	Q3V3R4	1 - high confidence	20		1	1	1	1	1		1	1	1	1	1				1	1	1	1	1			1			1	1	1			1
mouse	Q61207	1 - high confidence	20	1	1	1	1		1		1		1	1	1		1		1	1	1	1	1	1	1	1		1						1
mouse	Q8R366	1 - high confidence	20				1		1		1	1	1	1	1		1		1	1	1	1	1	1	1	1		1	1			1		1
mouse	Q99KF1	1 - high confidence	20		1		1		1		1		1	1	1				1	1	1	1	1	1	1	1		1	1			1	1	1
mouse	Q9DBH5	1 - high confidence	20		1	1	1		1		1	1	1	1	1		1				1	1	1	1		1		1	1			1	1	1
mouse	P41731	1 - high confidence	19	1	1	1	1		1			1	1	1	1				1	1		1	1	1	1	1	1	1						1
mouse	Q80V42	1 - high confidence	19	1	1	1		1			1	1	1	1		1			1	1				1	1		1			1	1	1	1	1
mouse	Q8BLG2	1 - high confidence	19	1			1		1		1	1	1	1	1	1				1	1	1	1	1	1	1	1	1						1
mouse	P10404	1 - high confidence	19				1	1	1	1	1		1				1		1	1	1	1	1			1			1	1	1	1	1	1
mouse	P58242	1 - high confidence	19	1	1	1	1		1	1	1	1	1	1			1	1			1	1	1		1	1			1					1
mouse	Q00560	1 - high confidence	19		1	1	1		1		1	1	1	1	1				1	1	1			1		1		1	1		1	1		1
mouse	Q00609	1 - high confidence	19	1	1		1		1	1	1	1					1	1		1		1		1	1	1		1			1	1	1	1
mouse	Q3TWN3	1 - high confidence	19	1	1	1	1				1	1	1	1	1		1		1	1		1		1	1	1		1				1		1
mouse	Q8R464	1 - high confidence	19	1	1	1			1		1		1	1	1	1			1	1	1	1	1		1	1		1					1	1
mouse	Q99J21	1 - high confidence	19	1	1	1	1				1	1	1	1	1				1		1	1	1	1	1	1		1				1		1
mouse	Q99MB3	1 - high confidence	19		1	1	1		1		1	1	1	1	1				1	1	1	1	1	1		1		1				1		1
mouse	Q9R0L9	1 - high confidence	19				1		1		1	1	1	1	1				1	1	1	1	1	1	1	1		1	1			1		1
mouse	Q9Z2G6	1 - high confidence	19		1	1			1		1	1		1	1	1			1		1	1	1	1	1	1		1	1			1	1
mouse	Q05793	1 - high confidence	18	1	1	1	1		1	1	1	1	1	1						1				1	1	1	1	1	1					1
mouse	Q9WVD4	1 - high confidence	18						1		1	1	1	1	1	1			1		1	1	1	1		1	1	1	1			1		1
mouse	O08602	1 - high confidence	18		1	1	1		1		1	1	1	1			1		1	1	1	1	1		1	1		1						1
mouse	Q61001	1 - high confidence	18	1	1	1	1	1	1		1	1		1				1				1	1	1	1	1		1	1					1
mouse	Q61730	1 - high confidence	18				1	1	1		1	1	1		1				1	1	1	1	1	1		1			1		1	1		1
mouse	Q62179	1 - high confidence	18	1	1	1	1		1		1	1							1		1	1			1	1		1	1	1	1	1		1
mouse	Q6ZQA6	1 - high confidence	18	1	1	1				1	1	1	1	1	1					1	1	1		1	1	1		1	1					1
mouse	Q8CFE6	1 - high confidence	18				1				1		1	1	1	1	1		1	1	1	1	1	1		1		1	1			1		1
mouse	Q9CPW5	1 - high confidence	18	1	1	1	1			1	1		1						1		1	1	1	1	1	1			1			1	1	1
mouse	Q9D8F3	1 - high confidence	18				1		1		1		1	1	1	1	1		1	1	1	1		1		1		1	1			1		1
mouse	Q9QZF2	1 - high confidence	18			1			1	1	1		1	1	1				1	1	1	1	1	1		1			1			1	1	1
mouse	Q9R1Q9	1 - high confidence	18		1	1			1		1	1	1	1	1			1	1				1	1	1	1		1		1		1		1
mouse	Q9Z0L0	1 - high confidence	18	1	1	1	1		1	1	1		1	1	1					1	1	1		1	1	1			1					1
mouse	Q9Z1P5	1 - high confidence	18	1		1	1		1		1		1	1	1		1				1	1	1	1	1	1		1	1					1
mouse	O35607	1 - high confidence	17				1		1		1		1	1	1	1			1	1	1	1	1	1		1		1	1					1
mouse	P31809	1 - high confidence	17	1	1	1	1	1	1		1	1					1		1	1				1	1	1		1		1				1
mouse	Q05909	1 - high confidence	17	1	1	1	1		1		1	1		1	1						1	1		1	1	1		1	1					1
mouse	Q61009	1 - high confidence	17					1	1				1	1			1	1	1	1	1	1	1	1		1		1	1			1	1
mouse	Q64449	1 - high confidence	17			1	1		1	1	1			1	1	1			1		1		1	1	1	1		1	1					1
mouse	Q6P6J9	1 - high confidence	17		1	1	1				1			1	1	1			1		1	1	1	1	1			1	1			1		1
mouse	Q80W68	1 - high confidence	17	1	1	1	1		1	1	1	1	1	1						1				1	1	1		1	1					1
mouse	Q810U4	1 - high confidence	17	1	1	1		1	1		1		1	1	1		1		1	1	1	1			1	1					1
mouse	Q8HW98	1 - high confidence	17	1	1	1	1		1		1			1	1	1			1	1	1	1	1	1	1									1
mouse	Q99KW9	1 - high confidence	17						1		1	1	1	1	1	1			1		1	1	1	1				1	1			1	1	1
mouse	Q9CZ52	1 - high confidence	17			1	1		1		1		1	1		1				1	1	1	1	1	1	1		1	1					1
mouse	Q9Z0F8	1 - high confidence	17				1		1				1	1			1		1	1	1	1	1	1		1		1	1		1	1	1
mouse	P19137	1 - high confidence	16	1	1	1	1		1		1	1		1	1	1								1	1	1	1	1						1
mouse	Q6DYE8	1 - high confidence	16	1	1	1	1	1			1	1		1					1				1	1	1	1	1	1						1
mouse	Q9QXX0	1 - high confidence	16				1		1		1		1	1	1	1				1		1	1	1		1	1	1	1					1
mouse	A2A8L5	1 - high confidence	16	1	1	1			1		1	1	1	1		1			1	1		1		1	1	1		1
mouse	O88507	1 - high confidence	16	1	1	1	1		1		1	1		1	1	1			1		1			1	1	1								1
mouse	P01898	1 - high confidence	16	1			1	1	1		1		1			1		1	1			1			1	1		1	1		1	1
mouse	P29533	1 - high confidence	16				1	1	1	1	1		1		1	1					1	1				1		1	1	1	1			1
mouse	P35456	1 - high confidence	16		1		1		1		1		1	1			1	1	1	1		1			1	1		1	1					1
mouse	P61979	1 - high confidence	16	1	1	1	1		1			1		1	1		1				1	1	1	1	1			1				1
mouse	P82349	1 - high confidence	16				1	1	1	1	1		1	1	1					1		1	1	1		1		1	1					1
mouse	P98063	1 - high confidence	16			1	1		1		1			1	1				1	1	1	1	1	1	1	1		1						1
mouse	Q01279	1 - high confidence	16				1		1	1	1			1	1	1			1		1	1	1	1		1		1	1					1
mouse	Q07797	1 - high confidence	16				1	1	1				1	1			1		1			1	1			1		1	1	1	1	1	1
mouse	Q60932	1 - high confidence	16	1	1		1		1		1	1	1	1	1	1	1			1		1	1		1			1
mouse	Q61147	1 - high confidence	16			1		1	1			1	1	1					1	1	1	1	1	1	1	1		1			1
mouse	Q8JZZ7	1 - high confidence	16	1	1	1			1	1	1	1		1	1		1				1	1	1	1	1	1
mouse	Q8K209	1 - high confidence	16			1			1		1		1	1	1	1			1	1	1	1	1	1				1	1		1
mouse	Q8R143	1 - high confidence	16		1		1		1			1	1	1					1	1	1	1	1	1		1		1	1			1
mouse	Q8R1V4	1 - high confidence	16				1		1		1		1	1	1						1	1	1	1		1		1	1			1	1	1
mouse	Q8R2Y2	1 - high confidence	16	1	1	1	1	1	1		1	1	1							1				1	1	1		1					1	1
mouse	Q9JLB9	1 - high confidence	16				1		1		1	1	1	1	1	1			1	1	1			1		1		1	1					1
mouse	O54990	1 - high confidence	15	1	1	1			1		1	1		1	1				1		1			1	1	1		1						1
mouse	P24638	1 - high confidence	15					1	1				1	1	1				1		1	1	1	1	1			1	1		1	1
mouse	P35951	1 - high confidence	15						1		1	1		1	1	1	1		1	1	1	1		1		1		1						1
mouse	P42703	1 - high confidence	15		1	1		1			1	1		1	1						1	1	1	1		1		1			1			1
mouse	Q06890	1 - high confidence	15	1		1			1				1	1	1		1		1	1		1	1	1	1					1	1
mouse	Q64151	1 - high confidence	15			1			1				1	1	1	1			1	1		1	1	1	1			1	1			1
mouse	Q6PHU5	1 - high confidence	15			1		1	1				1	1	1	1			1		1	1	1	1	1			1		1
mouse	Q8BJ83	1 - high confidence	15				1		1			1	1	1	1	1			1		1	1	1	1		1		1	1
mouse	Q9D8B7	1 - high confidence	15	1	1	1			1	1	1		1	1	1				1	1	1				1	1								1
mouse	Q9DBG6	1 - high confidence	15		1		1		1			1	1	1	1				1			1	1	1	1			1				1		1
mouse	Q9EQS9	1 - high confidence	15	1	1	1	1		1		1				1						1	1	1	1	1	1			1					1
mouse	Q91V14	1 - high confidence	14	1		1			1			1		1	1	1			1		1			1	1		1	1		1
mouse	O08530	1 - high confidence	14				1	1	1	1	1			1			1				1	1				1			1		1	1	1
mouse	O35375	1 - high confidence	14				1		1		1		1	1	1		1	1		1			1	1		1			1					1
mouse	O88322	1 - high confidence	14	1	1	1			1		1	1		1							1	1		1	1	1		1						1
mouse	P28828	1 - high confidence	14	1		1			1	1	1			1	1					1	1	1	1		1	1			1
mouse	P59383	1 - high confidence	14	1	1	1	1	1			1	1		1	1									1	1	1		1						1
mouse	P70302	1 - high confidence	14		1	1						1		1	1				1	1		1	1	1		1		1	1			1
mouse	Q8R3L5	1 - high confidence	14						1			1		1	1				1	1	1	1	1	1		1					1	1	1
mouse	Q8VHY0	1 - high confidence	14				1		1	1	1		1		1					1	1	1	1			1		1	1					1
mouse	Q9JIP4	1 - high confidence	14	1		1						1		1	1	1				1	1	1	1	1	1						1	1
mouse	A2ARV4	1 - high confidence	13	1	1	1		1	1		1	1		1										1	1	1		1						1
mouse	O35393	1 - high confidence	13	1	1	1			1		1			1	1	1					1	1	1	1	1
mouse	O54732	1 - high confidence	13	1	1	1							1	1		1				1	1	1	1	1	1			1
mouse	O54901	1 - high confidence	13					1	1	1			1		1				1		1	1	1							1		1	1	1
mouse	P07141	1 - high confidence	13				1		1		1	1	1	1					1	1						1		1	1			1		1
mouse	P11835	1 - high confidence	13				1	1	1		1		1				1	1								1				1	1	1	1	1
mouse	P15209	1 - high confidence	13			1		1	1				1	1	1	1			1		1	1	1	1	1
mouse	P27038	1 - high confidence	13			1			1			1	1	1	1	1			1	1		1	1	1				1
mouse	P28843	1 - high confidence	13	1	1	1		1				1							1					1	1					1	1	1	1	1
mouse	P29699	1 - high confidence	13				1		1				1						1	1		1		1	1	1		1	1			1	1
mouse	P35803	1 - high confidence	13						1				1	1	1	1				1	1	1	1	1		1		1						1
mouse	P39061	1 - high confidence	13	1	1	1	1				1	1		1						1				1	1	1		1						1
mouse	P39087	1 - high confidence	13	1	1		1					1		1	1		1			1		1	1		1			1		1
mouse	P55144	1 - high confidence	13	1	1						1		1	1	1						1	1		1	1	1		1				1
mouse	Q00651	1 - high confidence	13						1	1			1				1	1		1				1				1	1	1	1	1	1
mouse	Q3TB92	1 - high confidence	13					1	1			1	1	1			1	1		1	1									1	1	1	1
mouse	Q60519	1 - high confidence	13	1	1	1						1		1	1					1		1	1	1	1	1		1
mouse	Q61391	1 - high confidence	13	1	1		1	1	1		1	1		1									1		1	1		1						1
mouse	Q61469	1 - high confidence	13						1			1	1	1	1				1	1	1	1	1	1		1		1
mouse	Q64314	1 - high confidence	13				1		1	1	1	1		1	1				1					1		1		1		1				1
mouse	Q8BFU7	1 - high confidence	13	1									1	1	1	1						1	1	1	1			1			1	1	1
mouse	Q8BLQ9	1 - high confidence	13			1			1				1	1	1	1			1		1	1	1			1		1		1
mouse	Q8BTJ4	1 - high confidence	13		1	1		1	1				1		1				1			1	1	1				1				1	1
mouse	Q8BXQ2	1 - high confidence	13		1						1			1	1				1		1	1	1	1		1		1				1		1
mouse	Q8K1G2	1 - high confidence	13		1	1			1		1	1	1	1						1		1				1		1	1					1
mouse	Q99K41	1 - high confidence	13			1			1		1		1	1	1					1		1	1	1	1	1		1
mouse	Q9DA75	1 - high confidence	13						1		1			1	1	1					1	1	1	1	1	1						1		1
mouse	Q9Z138	1 - high confidence	13								1	1		1	1	1			1		1	1	1	1	1	1		1
mouse	O70309	1 - high confidence	12				1		1		1		1	1					1	1	1	1				1		1	1
mouse	P21956	1 - high confidence	12			1							1	1					1		1	1	1	1		1		1	1					1
mouse	Q3TD49	1 - high confidence	12						1			1	1	1	1	1				1	1	1						1	1			1
mouse	Q62165	1 - high confidence	12				1		1		1		1	1	1				1	1		1		1		1								1
mouse	Q7TN73	1 - high confidence	12			1					1			1	1				1			1	1	1	1			1				1		1
mouse	Q8VI56	1 - high confidence	12			1			1		1	1	1	1							1	1	1	1				1						1
mouse	Q9DBX3	1 - high confidence	12		1	1	1	1	1		1	1							1							1		1			1		1
mouse	P24063	1 - high confidence	11					1	1		1						1	1		1							1			1	1	1	1
mouse	O35379	1 - high confidence	11				1		1	1	1	1					1			1						1				1		1		1
mouse	P01897	1 - high confidence	11	1	1	1			1				1	1			1								1			1		1	1
mouse	P05622	1 - high confidence	11				1		1	1	1		1		1					1						1		1	1					1
mouse	P07356	1 - high confidence	11				1		1	1		1	1		1		1			1						1		1						1
mouse	P08101	1 - high confidence	11				1	1	1		1		1				1	1												1	1	1		1
mouse	P10810	1 - high confidence	11				1	1	1		1		1				1	1								1		1	1	1
mouse	P15920	1 - high confidence	11		1						1			1	1				1			1	1	1		1		1				1
mouse	P17182	1 - high confidence	11		1				1			1		1			1					1	1		1			1			1			1
mouse	P26952	1 - high confidence	11				1		1		1						1	1		1									1	1	1	1	1
mouse	P54751	1 - high confidence	11				1	1		1	1			1						1						1			1			1	1	1
mouse	Q61526	1 - high confidence	11	1	1						1	1	1	1						1				1	1	1		1
mouse	Q64695	1 - high confidence	11				1		1		1		1				1	1								1			1			1	1	1
mouse	Q69ZF7	1 - high confidence	11						1		1		1				1		1	1						1		1	1			1		1
mouse	Q6NVD0	1 - high confidence	11	1	1	1					1			1	1									1	1	1		1						1
mouse	Q6PFE7	1 - high confidence	11				1				1		1	1	1	1					1			1		1		1						1
mouse	Q80YX1	1 - high confidence	11				1		1	1	1			1							1	1	1			1		1						1
mouse	Q8BMC0	1 - high confidence	11						1		1			1	1					1	1	1	1	1							1			1
mouse	Q8CG19	1 - high confidence	11		1	1			1		1			1						1		1		1	1	1		1
mouse	Q8K078	1 - high confidence	11				1		1		1								1	1						1		1	1			1	1	1
mouse	Q91V08	1 - high confidence	11		1				1				1				1	1								1			1	1	1	1	1
mouse	Q99JW5	1 - high confidence	11	1	1	1	1				1	1							1						1	1		1						1
mouse	Q9ESM6	1 - high confidence	11						1				1	1	1					1	1	1	1	1						1	1
mouse	Q9JIS5	1 - high confidence	11			1					1			1	1	1			1		1	1	1	1										1
mouse	Q9WTR5	1 - high confidence	11				1	1	1	1	1				1						1	1	1			1								1
mouse	O08603	1 - high confidence	10	1		1					1	1		1			1				1			1	1		1
mouse	O55111	1 - high confidence	10	1	1		1				1	1							1						1	1		1						1
mouse	O70458	1 - high confidence	10				1		1	1	1		1									1				1		1	1					1
mouse	O88307	1 - high confidence	10		1		1		1		1			1	1									1		1		1						1
mouse	P01899	1 - high confidence	10						1		1		1					1	1	1										1	1	1	1
mouse	P33896	1 - high confidence	10						1		1			1	1		1					1		1				1			1			1
mouse	P35822	1 - high confidence	10	1	1	1			1		1								1	1					1	1								1
mouse	P52795	1 - high confidence	10			1			1	1	1								1	1					1	1				1				1
mouse	P55065	1 - high confidence	10	1		1			1					1	1							1	1		1	1		1
mouse	P59481	1 - high confidence	10						1				1	1	1					1		1	1	1				1	1
mouse	P62960	1 - high confidence	10				1		1		1	1		1	1		1			1					1	1
mouse	P68040	1 - high confidence	10				1			1	1	1					1			1					1	1					1	1
mouse	P70232	1 - high confidence	10						1				1		1				1	1	1	1	1								1	1
mouse	P70414	1 - high confidence	10						1					1	1				1		1	1	1	1	1			1
mouse	P97785	1 - high confidence	10			1			1		1			1	1	1				1	1	1		1
mouse	P97792	1 - high confidence	10						1					1	1	1			1			1	1	1	1			1
mouse	Q3UQ28	1 - high confidence	10			1					1			1	1					1		1	1	1	1			1
mouse	Q61072	1 - high confidence	10						1				1	1	1					1	1	1	1	1		1
mouse	Q62011	1 - high confidence	10	1		1			1		1	1		1										1	1	1		1
mouse	Q71M36	1 - high confidence	10		1	1			1				1	1	1						1	1	1									1
mouse	Q8BGT0	1 - high confidence	10						1				1		1				1		1	1	1					1	1			1
mouse	Q91ZV3	1 - high confidence	10						1				1	1		1				1		1		1				1	1					1
mouse	Q9CR23	1 - high confidence	10				1		1		1			1	1				1		1		1	1				1
mouse	Q9DBU0	1 - high confidence	10				1				1			1					1			1	1	1		1							1	1
mouse	Q9JIF3	1 - high confidence	10				1		1		1								1	1	1			1		1		1						1
mouse	Q9QY81	1 - high confidence	10											1	1						1	1	1	1		1		1				1	1
mouse	Q9R069	1 - high confidence	10				1	1	1		1	1		1					1							1		1						1
mouse	A2ARI4	1 - high confidence	9				1			1	1		1	1	1					1				1				1
mouse	B0V2N1	1 - high confidence	9			1			1		1		1	1	1					1		1	1
mouse	O35887	1 - high confidence	9				1				1											1	1	1	1	1		1						1
mouse	P14142	1 - high confidence	9	1	1	1		1						1										1	1	1		1
mouse	P18242	1 - high confidence	9						1		1				1				1		1	1	1									1		1
mouse	P30558	1 - high confidence	9	1	1	1	1				1											1			1	1								1
mouse	P35330	1 - high confidence	9					1					1	1				1							1					1	1	1	1
mouse	P70424	1 - high confidence	9						1			1	1	1	1					1				1		1			1
mouse	Q00941	1 - high confidence	9						1		1						1	1								1				1	1		1	1
mouse	Q00993	1 - high confidence	9				1			1	1		1							1						1			1	1				1
mouse	Q2EY15	1 - high confidence	9	1		1					1	1		1										1	1	1								1
mouse	Q60755	1 - high confidence	9	1		1					1			1	1	1								1	1	1
mouse	Q61554	1 - high confidence	9					1	1					1	1		1			1				1		1		1
mouse	Q63961	1 - high confidence	9				1	1	1		1	1														1			1		1			1
mouse	Q8CIF6	1 - high confidence	9		1	1			1													1	1			1						1	1	1
mouse	Q8R373	1 - high confidence	9			1		1	1	1				1	1									1		1			1
mouse	Q91V24	1 - high confidence	9						1				1	1			1		1	1											1	1	1
mouse	Q99PJ0	1 - high confidence	9						1				1		1				1	1	1	1	1							1
mouse	Q9CZT5	1 - high confidence	9			1	1		1		1		1							1		1				1			1
mouse	Q9DCP2	1 - high confidence	9				1		1		1				1						1	1	1			1								1
mouse	Q9EP73	1 - high confidence	9						1								1	1	1									1		1	1	1	1
mouse	O08842	1 - high confidence	8										1		1					1	1	1							1	1	1
mouse	P05555	1 - high confidence	8					1	1				1				1	1												1	1	1
mouse	P18181	1 - high confidence	8					1	1									1		1										1	1	1	1
mouse	P50284	1 - high confidence	8						1				1						1	1	1	1	1						1
mouse	P56726	1 - high confidence	8						1				1	1						1		1		1				1				1
mouse	Q00493	1 - high confidence	8						1		1				1				1	1	1	1	1
mouse	Q52KR2	1 - high confidence	8			1	1		1						1	1								1		1		1
mouse	Q62469	1 - high confidence	8			1			1				1	1					1						1	1						1
mouse	Q6PGD0	1 - high confidence	8											1	1				1			1	1	1				1				1
mouse	Q6PHS9	1 - high confidence	8	1		1								1	1					1		1		1	1
mouse	Q8BNA6	1 - high confidence	8			1			1					1	1	1						1	1	1
mouse	Q8CFZ4	1 - high confidence	8			1	1				1			1										1		1		1						1
mouse	Q8K2P7	1 - high confidence	8				1						1	1	1		1						1	1										1
mouse	Q8R422	1 - high confidence	8				1		1		1		1							1		1				1								1
mouse	Q922P8	1 - high confidence	8	1		1							1	1	1					1					1				1
mouse	Q99P91	1 - high confidence	8				1		1				1					1		1		1							1					1
mouse	Q9DB72	1 - high confidence	8			1								1	1						1	1	1	1	1
mouse	Q9JM99	1 - high confidence	8						1				1	1			1		1							1			1			1
mouse	Q9QZM4	1 - high confidence	8						1				1						1					1				1	1			1	1
mouse	Q9WTR1	1 - high confidence	8					1									1	1	1											1	1	1	1
mouse	Q9WUC3	1 - high confidence	8						1					1	1	1					1	1	1	1
mouse	P63075	1 - high confidence	7						1		1						1							1			1	1						1
mouse	A2A699	1 - high confidence	7											1	1						1	1		1				1	1
mouse	O08747	1 - high confidence	7						1			1	1		1							1		1				1
mouse	O54819	1 - high confidence	7				1				1		1													1		1	1					1
mouse	O54965	1 - high confidence	7								1				1							1	1	1				1						1
mouse	O70258	1 - high confidence	7						1				1	1	1					1		1	1
mouse	O70340	1 - high confidence	7		1						1				1									1		1		1						1
mouse	P02772	1 - high confidence	7						1				1	1														1	1			1	1
mouse	P03991	1 - high confidence	7				1				1						1									1		1		1				1
mouse	P06800	1 - high confidence	7						1								1	1												1	1	1	1
mouse	P0C192	1 - high confidence	7						1				1		1					1	1	1	1
mouse	P12960	1 - high confidence	7					1	1						1				1		1	1	1
mouse	P14429	1 - high confidence	7					1	1										1											1	1	1	1
mouse	P15306	1 - high confidence	7							1	1							1								1		1	1					1
mouse	P29788	1 - high confidence	7						1					1					1					1		1		1	1
mouse	P60882	1 - high confidence	7		1				1					1	1					1		1	1
mouse	P70193	1 - high confidence	7						1					1	1						1	1	1	1
mouse	Q01705	1 - high confidence	7								1								1	1		1	1									1		1
mouse	Q01887	1 - high confidence	7						1		1	1	1							1	1								1
mouse	Q02788	1 - high confidence	7				1	1			1									1						1		1						1
mouse	Q2PZL6	1 - high confidence	7			1			1					1	1	1					1	1
mouse	Q3TH73	1 - high confidence	7									1							1	1	1	1	1	1
mouse	Q3TMX7	1 - high confidence	7				1				1												1	1		1			1					1
mouse	Q3TYX2	1 - high confidence	7				1		1		1		1							1						1								1
mouse	Q61137	1 - high confidence	7												1				1		1	1	1	1		1
mouse	Q61555	1 - high confidence	7			1			1					1	1								1	1	1
mouse	Q61809	1 - high confidence	7											1	1	1					1	1	1	1
mouse	Q640R3	1 - high confidence	7					1	1				1								1	1	1							1
mouse	Q810U3	1 - high confidence	7	1					1		1				1				1	1					1
mouse	Q8BLK3	1 - high confidence	7						1						1				1		1	1	1							1
mouse	Q8CG64	1 - high confidence	7								1			1	1							1	1	1										1
mouse	Q91V87	1 - high confidence	7						1		1		1	1						1	1	1
mouse	Q9D8N1	1 - high confidence	7				1				1															1		1				1	1	1
mouse	Q9DBV4	1 - high confidence	7	1					1		1									1		1	1		1
mouse	Q9JI59	1 - high confidence	7				1		1			1		1					1	1	1
mouse	Q9WTS5	1 - high confidence	7				1		1		1		1		1													1						1
mouse	Q9Z0E8	1 - high confidence	7				1		1		1		1	1						1						1
mouse	O35161	1 - high confidence	6		1	1			1					1											1			1
mouse	O70255	1 - high confidence	6		1						1	1														1		1				1
mouse	O88393	1 - high confidence	6											1	1					1						1			1				1
mouse	O88783	1 - high confidence	6																1					1		1		1				1	1
mouse	O89026	1 - high confidence	6		1																1	1	1			1		1
mouse	P05532	1 - high confidence	6						1		1	1		1												1		1
mouse	P06339	1 - high confidence	6										1				1													1	1	1	1
mouse	P09803	1 - high confidence	6	1	1							1							1						1									1
mouse	P0C7W3	1 - high confidence	6											1								1	1	1		1		1
mouse	P12032	1 - high confidence	6								1									1		1				1		1						1
mouse	P21803	1 - high confidence	6	1	1	1			1					1											1
mouse	P23819	1 - high confidence	6					1							1						1	1	1					1
mouse	P27512	1 - high confidence	6	1														1	1						1					1		1
mouse	P31041	1 - high confidence	6															1		1										1	1	1	1
mouse	P35969	1 - high confidence	6			1							1	1										1	1				1
mouse	P84091	1 - high confidence	6											1	1					1		1	1					1
mouse	P86044	1 - high confidence	6		1		1					1							1							1		1
mouse	Q01965	1 - high confidence	6														1	1												1	1	1	1
mouse	Q03137	1 - high confidence	6						1			1		1	1											1		1
mouse	Q2MV57	1 - high confidence	6	1	1	1			1										1						1
mouse	Q3V1M1	1 - high confidence	6						1							1						1	1			1					1
mouse	Q3V1T4	1 - high confidence	6								1			1									1	1		1		1
mouse	Q56A07	1 - high confidence	6	1		1								1	1									1	1
mouse	Q5U431	1 - high confidence	6				1		1		1								1										1					1
mouse	Q60750	1 - high confidence	6	1			1				1														1	1								1
mouse	Q60847	1 - high confidence	6			1	1				1			1												1								1
mouse	Q61330	1 - high confidence	6			1					1			1	1	1									1
mouse	Q61738	1 - high confidence	6						1	1									1	1	1	1
mouse	Q61838	1 - high confidence	6					1	1										1	1				1									1
mouse	Q62230	1 - high confidence	6					1	1				1					1												1	1
mouse	Q6PCX7	1 - high confidence	6						1						1					1	1	1	1
mouse	Q6V4S5	1 - high confidence	6			1			1					1	1				1						1
mouse	Q6VNS1	1 - high confidence	6											1	1	1					1	1	1
mouse	Q6VVW5	1 - high confidence	6						1		1		1							1						1								1
mouse	Q7TPD3	1 - high confidence	6						1						1				1		1			1				1
mouse	Q80YA8	1 - high confidence	6			1			1				1	1		1								1
mouse	Q8BKU8	1 - high confidence	6				1				1													1		1		1						1
mouse	Q8BXZ1	1 - high confidence	6		1									1								1	1		1							1
mouse	Q8C8T7	1 - high confidence	6			1			1						1						1	1	1
mouse	Q8JZL1	1 - high confidence	6								1											1	1	1				1						1
mouse	Q8K1S3	1 - high confidence	6				1				1									1						1			1					1
mouse	Q8VHW2	1 - high confidence	6						1						1						1	1	1											1
mouse	Q9CY50	1 - high confidence	6				1				1								1							1						1		1
mouse	Q9D1H9	1 - high confidence	6	1		1		1						1	1									1
mouse	Q9EPR5	1 - high confidence	6			1			1											1		1	1	1
mouse	Q9EQF4	1 - high confidence	6																1			1	1							1	1	1
mouse	Q9JJR8	1 - high confidence	6			1								1	1							1	1					1
mouse	Q9JMI7	1 - high confidence	6			1					1	1							1	1						1
mouse	Q9QUN7	1 - high confidence	6						1		1		1				1	1										1
mouse	Q9R045	1 - high confidence	6			1								1						1				1		1			1
mouse	Q9R1B9	1 - high confidence	6			1			1					1	1									1				1
mouse	O35136	1 - high confidence	5						1						1						1	1	1
mouse	O54890	1 - high confidence	5										1							1									1		1	1
mouse	O54991	1 - high confidence	5											1	1				1			1	1
mouse	P01872	1 - high confidence	5					1																		1				1	1	1
mouse	P08920	1 - high confidence	5																									1		1	1	1	1
mouse	P10605	1 - high confidence	5			1			1													1	1									1
mouse	P16382	1 - high confidence	5						1		1									1											1			1
mouse	P25446	1 - high confidence	5						1								1			1											1	1
mouse	P25918	1 - high confidence	5																										1	1	1	1		1
mouse	P26011	1 - high confidence	5																										1	1	1	1	1
mouse	P28798	1 - high confidence	5						1						1							1	1					1
mouse	P35917	1 - high confidence	5								1	1									1							1						1
mouse	P37172	1 - high confidence	5				1				1									1						1								1
mouse	P52801	1 - high confidence	5			1					1											1	1			1
mouse	P55292	1 - high confidence	5								1			1					1					1				1
mouse	P56485	1 - high confidence	5						1				1							1								1	1
mouse	P61622	1 - high confidence	5				1			1	1															1								1
mouse	P97326	1 - high confidence	5				1						1						1						1	1
mouse	Q05685	1 - high confidence	5					1	1									1		1											1
mouse	Q18PI6	1 - high confidence	5						1									1												1		1	1
mouse	Q2YFS1	1 - high confidence	5						1								1	1												1	1
mouse	Q61292	1 - high confidence	5			1		1	1					1														1
mouse	Q62356	1 - high confidence	5			1					1			1										1				1
mouse	Q64277	1 - high confidence	5						1								1	1								1				1
mouse	Q6DFY8	1 - high confidence	5												1				1		1	1	1
mouse	Q6F3F9	1 - high confidence	5						1	1	1		1							1
mouse	Q7TQA1	1 - high confidence	5						1					1	1				1									1
mouse	Q80TR4	1 - high confidence	5			1								1	1				1					1
mouse	Q80TS3	1 - high confidence	5						1						1					1	1	1
mouse	Q80Z24	1 - high confidence	5						1						1				1			1	1
mouse	Q810C0	1 - high confidence	5						1						1						1	1	1
mouse	Q8BGD4	1 - high confidence	5									1		1										1		1		1
mouse	Q8BGV3	1 - high confidence	5	1		1						1													1	1
mouse	Q8BM13	1 - high confidence	5												1						1	1	1	1
mouse	Q8VCM8	1 - high confidence	5				1				1											1				1								1
mouse	Q8VIM0	1 - high confidence	5											1			1			1										1		1
mouse	Q99K10	1 - high confidence	5						1						1						1	1	1
mouse	Q99PD7	1 - high confidence	5												1				1		1	1	1
mouse	Q99PH1	1 - high confidence	5						1						1	1						1	1
mouse	Q9CS84	1 - high confidence	5						1						1						1	1	1
mouse	Q9CYD3	1 - high confidence	5				1				1												1	1				1
mouse	Q9D1T0	1 - high confidence	5											1	1					1	1	1
mouse	Q9EPQ1	1 - high confidence	5						1								1													1	1	1
mouse	Q9JM58	1 - high confidence	5																	1		1	1			1			1
mouse	Q9QUK6	1 - high confidence	5						1				1				1	1		1
mouse	Q9QUR8	1 - high confidence	5							1					1					1									1			1
mouse	Q9QZC2	1 - high confidence	5												1			1			1	1										1
mouse	Q9R1V7	1 - high confidence	5		1						1	1														1		1
mouse	Q9WTZ2	1 - high confidence	5											1								1	1	1				1
mouse	Q9WUP1	1 - high confidence	5											1	1				1					1					1
mouse	Q9WVB4	1 - high confidence	5											1					1	1						1							1
mouse	Q9Z0Z4	1 - high confidence	5			1			1					1						1					1
mouse	Q9Z2W8	1 - high confidence	5						1						1						1	1	1
mouse	Q9Z2W9	1 - high confidence	5						1						1						1	1	1
mouse	A2AJN7	1 - high confidence	4				1				1															1								1
mouse	O35632	1 - high confidence	4		1	1																			1	1
mouse	O35664	1 - high confidence	4						1				1					1												1
mouse	O70394	1 - high confidence	4																											1	1	1	1
mouse	P01868	1 - high confidence	4																1			1	1			1
mouse	P04235	1 - high confidence	4																											1	1	1	1
mouse	P06332	1 - high confidence	4																											1	1	1	1
mouse	P11087	1 - high confidence	4				1				1															1				1
mouse	P11942	1 - high confidence	4																											1	1	1	1
mouse	P22725	1 - high confidence	4											1							1	1	1
mouse	P26151	1 - high confidence	4					1	1								1	1
mouse	P28078	1 - high confidence	4					1																						1	1	1
mouse	P35802	1 - high confidence	4												1						1	1	1
mouse	P35846	1 - high confidence	4						1			1	1						1
mouse	P35918	1 - high confidence	4								1								1	1														1
mouse	P37889	1 - high confidence	4																			1	1			1		1
mouse	P52430	1 - high confidence	4					1						1																		1	1
mouse	P58022	1 - high confidence	4											1										1		1		1
mouse	P60755	1 - high confidence	4												1						1	1	1
mouse	P70207	1 - high confidence	4												1	1			1	1
mouse	P70211	1 - high confidence	4											1	1	1						1
mouse	P83626	1 - high confidence	4																1												1	1	1
mouse	P98086	1 - high confidence	4					1	1									1													1
mouse	Q3UZV7	1 - high confidence	4												1				1			1	1
mouse	Q60943	1 - high confidence	4								1						1		1													1
mouse	Q61003	1 - high confidence	4																											1	1	1	1
mouse	Q61098	1 - high confidence	4																1												1	1	1
mouse	Q61549	1 - high confidence	4				1		1								1	1
mouse	Q61851	1 - high confidence	4						1				1	1								1
mouse	Q62059	1 - high confidence	4											1										1		1		1
mouse	Q62277	1 - high confidence	4						1						1				1		1
mouse	Q64487	1 - high confidence	4											1	1						1		1
mouse	Q69ZU6	1 - high confidence	4											1	1	1			1
mouse	Q6IEE6	1 - high confidence	4			1								1	1					1
mouse	Q6P1D5	1 - high confidence	4												1				1			1	1
mouse	Q6PIC6	1 - high confidence	4												1					1			1		1
mouse	Q80T21	1 - high confidence	4						1																	1		1				1
mouse	Q80WT4	1 - high confidence	4				1				1															1								1
mouse	Q80ZF8	1 - high confidence	4						1						1						1	1
mouse	Q8BG84	1 - high confidence	4						1								1	1												1
mouse	Q8BHY3	1 - high confidence	4											1	1					1									1
mouse	Q8BLI4	1 - high confidence	4				1				1													1										1
mouse	Q8BQC3	1 - high confidence	4			1								1		1								1
mouse	Q8BR76	1 - high confidence	4						1				1						1	1
mouse	Q8BTG6	1 - high confidence	4				1				1				1													1
mouse	Q8C341	1 - high confidence	4																			1	1	1				1
mouse	Q8K5B1	1 - high confidence	4						1					1						1									1
mouse	Q8VDN2	1 - high confidence	4						1				1				1		1
mouse	Q91VN0	1 - high confidence	4			1					1													1				1
mouse	Q923B6	1 - high confidence	4					1	1				1																1
mouse	Q923L3	1 - high confidence	4						1		1				1					1
mouse	Q925Q3	1 - high confidence	4						1															1		1		1
mouse	Q99N28	1 - high confidence	4						1						1				1											1
mouse	Q9D4J3	1 - high confidence	4										1	1						1								1
mouse	Q9D6X6	1 - high confidence	4						1					1						1				1
mouse	Q9JHJ8	1 - high confidence	4						1		1			1			1
mouse	Q9JL06	1 - high confidence	4								1														1	1								1
mouse	Q9QYS2	1 - high confidence	4												1						1	1	1
mouse	Q9R0M0	1 - high confidence	4						1		1		1	1
mouse	Q9R1V6	1 - high confidence	4						1						1				1			1
mouse	Q9Z0K8	1 - high confidence	4			1		1						1											1
mouse	A6H584	1 - high confidence	3					1	1		1
mouse	A8E0Y8	1 - high confidence	3																											1	1		1
mouse	O08545	1 - high confidence	3		1																	1				1
mouse	O08665	1 - high confidence	3												1							1	1
mouse	O09047	1 - high confidence	3						1								1	1
mouse	O35714	1 - high confidence	3																												1	1	1
mouse	O70174	1 - high confidence	3												1								1	1
mouse	O88207	1 - high confidence	3				1				1																							1
mouse	P01731	1 - high confidence	3																											1	1	1
mouse	P04202	1 - high confidence	3																												1	1	1
mouse	P09470	1 - high confidence	3					1	1																					1
mouse	P09581	1 - high confidence	3						1								1	1
mouse	P11152	1 - high confidence	3																			1			1	1
mouse	P13379	1 - high confidence	3																												1	1	1
mouse	P14426	1 - high confidence	3							1	1															1
mouse	P16872	1 - high confidence	3																											1	1		1
mouse	P18337	1 - high confidence	3																											1	1	1
mouse	P28481	1 - high confidence	3			1								1										1
mouse	P28653	1 - high confidence	3								1															1								1
mouse	P29754	1 - high confidence	3			1		1						1
mouse	P31428	1 - high confidence	3					1											1							1
mouse	P34902	1 - high confidence	3																												1	1	1
mouse	P35329	1 - high confidence	3																											1	1	1
mouse	P39038	1 - high confidence	3						1										1		1
mouse	P41272	1 - high confidence	3																												1	1	1
mouse	P41593	1 - high confidence	3			1			1					1
mouse	P51655	1 - high confidence	3						1										1	1
mouse	P51680	1 - high confidence	3																												1	1	1
mouse	P55066	1 - high confidence	3												1							1	1
mouse	P55284	1 - high confidence	3			1		1																1
mouse	P70408	1 - high confidence	3																	1				1				1
mouse	P97927	1 - high confidence	3					1			1									1
mouse	Q04857	1 - high confidence	3					1												1						1
mouse	Q07409	1 - high confidence	3												1				1										1
mouse	Q14B62	1 - high confidence	3						1								1					1
mouse	Q3TNL8	1 - high confidence	3													1							1	1
mouse	Q3UH53	1 - high confidence	3																1			1	1
mouse	Q3UVX5	1 - high confidence	3																		1	1	1
mouse	Q4V9Z5	1 - high confidence	3												1	1			1
mouse	Q5DTL9	1 - high confidence	3												1				1				1
mouse	Q5U462	1 - high confidence	3																1					1										1
mouse	Q61361	1 - high confidence	3																		1	1	1
mouse	Q61527	1 - high confidence	3												1							1	1
mouse	Q61614	1 - high confidence	3					1	1												1
mouse	Q61625	1 - high confidence	3												1						1		1
mouse	Q62192	1 - high confidence	3						1									1												1
mouse	Q62312	1 - high confidence	3						1											1											1
mouse	Q63912	1 - high confidence	3																		1	1	1
mouse	Q64281	1 - high confidence	3														1	1														1
mouse	Q68FM6	1 - high confidence	3												1						1	1
mouse	Q6DIB5	1 - high confidence	3						1				1							1
mouse	Q6PDJ1	1 - high confidence	3			1						1		1
mouse	Q6R5N8	1 - high confidence	3						1								1	1
mouse	Q6X893	1 - high confidence	3						1				1						1
mouse	Q7TNR6	1 - high confidence	3												1	1					1
mouse	Q7TT36	1 - high confidence	3								1		1												1
mouse	Q80T41	1 - high confidence	3												1				1		1
mouse	Q80UL9	1 - high confidence	3																											1	1	1
mouse	Q8BHE4	1 - high confidence	3						1					1						1
mouse	Q8BJ48	1 - high confidence	3																			1	1	1
mouse	Q8BMK4	1 - high confidence	3						1								1			1
mouse	Q8BYM5	1 - high confidence	3						1						1						1
mouse	Q8BZ64	1 - high confidence	3		1				1																1
mouse	Q8BZ81	1 - high confidence	3												1						1		1
mouse	Q8JZM4	1 - high confidence	3												1							1	1
mouse	Q8K1S4	1 - high confidence	3											1					1						1
mouse	Q8K1T1	1 - high confidence	3						1								1		1
mouse	Q8K4F0	1 - high confidence	3																											1	1		1
mouse	Q8K4Z2	1 - high confidence	3			1								1	1
mouse	Q8R4F1	1 - high confidence	3											1	1					1
mouse	Q91WN2	1 - high confidence	3						1											1								1
mouse	Q91ZV8	1 - high confidence	3										1	1	1
mouse	Q9DCG2	1 - high confidence	3															1				1	1
mouse	Q9EPR4	1 - high confidence	3						1											1														1
mouse	Q9JI18	1 - high confidence	3												1							1	1
mouse	Q9JIF7	1 - high confidence	3											1	1		1
mouse	Q9JJF9	1 - high confidence	3						1				1												1
mouse	Q9JKA5	1 - high confidence	3				1					1																						1
mouse	Q9JMG4	1 - high confidence	3						1		1															1
mouse	Q9QUM4	1 - high confidence	3																												1	1	1
mouse	Q9R100	1 - high confidence	3																											1		1	1
mouse	Q9WUH7	1 - high confidence	3			1									1													1
mouse	Q9WUL5	1 - high confidence	3																											1		1	1
mouse	Q9WV18	1 - high confidence	3												1							1	1
mouse	Q9WVG5	1 - high confidence	3											1	1									1
mouse	Q9Z0L8	1 - high confidence	3																			1	1	1
mouse	Q9Z0U9	1 - high confidence	3						1		1																							1
mouse	Q9Z1Q5	1 - high confidence	3						1								1														1
mouse	A2A863	1 - high confidence	2						1				1
mouse	A2AFS3	1 - high confidence	2																1	1
mouse	B2RPV6	1 - high confidence	2																											1	1
mouse	O08538	1 - high confidence	2											1								1
mouse	O08912	1 - high confidence	2																									1						1
mouse	O09118	1 - high confidence	2											1							1
mouse	O35235	1 - high confidence	2																													1	1
mouse	O35409	1 - high confidence	2					1	1
mouse	O35516	1 - high confidence	2														1			1
mouse	O88998	1 - high confidence	2												1								1
mouse	O89103	1 - high confidence	2																													1	1
mouse	P01590	1 - high confidence	2																													1	1
mouse	P01881	1 - high confidence	2																											1	1
mouse	P01902	1 - high confidence	2														1													1
mouse	P01910	1 - high confidence	2					1																						1
mouse	P08121	1 - high confidence	2				1				1
mouse	P09793	1 - high confidence	2																													1	1
mouse	P10287	1 - high confidence	2								1															1
mouse	P10300	1 - high confidence	2																											1	1
mouse	P10493	1 - high confidence	2					1	1
mouse	P10761	1 - high confidence	2								1															1
mouse	P11214	1 - high confidence	2											1								1
mouse	P15530	1 - high confidence	2																											1	1
mouse	P16056	1 - high confidence	2																	1									1
mouse	P20693	1 - high confidence	2																											1	1
mouse	P21447	1 - high confidence	2					1											1
mouse	P22272	1 - high confidence	2														1														1
mouse	P24383	1 - high confidence	2																			1	1
mouse	P26618	1 - high confidence	2								1																							1
mouse	P27040	1 - high confidence	2											1														1
mouse	P27573	1 - high confidence	2					1					1
mouse	P27931	1 - high confidence	2																													1	1
mouse	P28047	1 - high confidence	2																			1	1
mouse	P30987	1 - high confidence	2																											1	1
mouse	P32211	1 - high confidence	2			1								1
mouse	P32299	1 - high confidence	2																			1	1
mouse	P35347	1 - high confidence	2												1				1
mouse	P35438	1 - high confidence	2												1													1
mouse	P42082	1 - high confidence	2						1								1
mouse	P47741	1 - high confidence	2																													1	1
mouse	P47774	1 - high confidence	2																												1	1
mouse	P48302	1 - high confidence	2						1												1
mouse	P55288	1 - high confidence	2								1																							1
mouse	P56481	1 - high confidence	2						1						1
mouse	P58682	1 - high confidence	2						1									1
mouse	P70205	1 - high confidence	2																		1	1
mouse	P70387	1 - high confidence	2						1									1
mouse	P97378	1 - high confidence	2																													1	1
mouse	P97468	1 - high confidence	2						1																	1
mouse	Q01815	1 - high confidence	2												1				1
mouse	Q02242	1 - high confidence	2																													1	1
mouse	Q02496	1 - high confidence	2											1														1
mouse	Q04683	1 - high confidence	2																											1	1
mouse	Q07104	1 - high confidence	2																						1	1
mouse	Q07763	1 - high confidence	2						1								1
mouse	Q2VLH6	1 - high confidence	2					1																						1
mouse	Q32M26	1 - high confidence	2												1							1
mouse	Q32MD9	1 - high confidence	2											1											1
mouse	Q3UTY6	1 - high confidence	2											1										1
mouse	Q3UUY6	1 - high confidence	2		1	1
mouse	Q3V0T4	1 - high confidence	2																											1	1
mouse	Q60805	1 - high confidence	2						1												1
mouse	Q60846	1 - high confidence	2																													1	1
mouse	Q61450	1 - high confidence	2															1														1
mouse	Q61627	1 - high confidence	2																			1	1
mouse	Q61790	1 - high confidence	2																													1	1
mouse	Q61830	1 - high confidence	2															1												1
mouse	Q62181	1 - high confidence	2																		1			1
mouse	Q64729	1 - high confidence	2			1																			1
mouse	Q66PY1	1 - high confidence	2											1	1
mouse	Q69ZK9	1 - high confidence	2												1						1
mouse	Q6AZB0	1 - high confidence	2			1								1
mouse	Q6DFX2	1 - high confidence	2						1				1
mouse	Q6GU68	1 - high confidence	2						1	1
mouse	Q6NXK8	1 - high confidence	2												1								1
mouse	Q6XJV4	1 - high confidence	2						1																							1
mouse	Q75VT8	1 - high confidence	2						1									1
mouse	Q7TN16	1 - high confidence	2																				1	1
mouse	Q7TSA3	1 - high confidence	2																													1	1
mouse	Q7TSP5	1 - high confidence	2				1													1
mouse	Q80T14	1 - high confidence	2			1								1
mouse	Q80TF3	1 - high confidence	2											1															1
mouse	Q80TR1	1 - high confidence	2												1							1
mouse	Q80UP8	1 - high confidence	2								1															1
mouse	Q80XU8	1 - high confidence	2												1					1
mouse	Q80ZD8	1 - high confidence	2												1				1
mouse	Q810B8	1 - high confidence	2			1									1
mouse	Q8BG39	1 - high confidence	2												1				1
mouse	Q8BH24	1 - high confidence	2																			1	1
mouse	Q8BH27	1 - high confidence	2										1		1
mouse	Q8BHA1	1 - high confidence	2												1				1
mouse	Q8BR86	1 - high confidence	2												1					1
mouse	Q8BYG9	1 - high confidence	2			1									1
mouse	Q8C255	1 - high confidence	2														1	1
mouse	Q8C6K9	1 - high confidence	2					1						1
mouse	Q8CBF3	1 - high confidence	2												1						1
mouse	Q8CEF9	1 - high confidence	2			1									1
mouse	Q8CGQ8	1 - high confidence	2						1						1
mouse	Q8CIF4	1 - high confidence	2												1								1
mouse	Q8K482	1 - high confidence	2						1																	1
mouse	Q8R139	1 - high confidence	2												1													1
mouse	Q8R2Q6	1 - high confidence	2						1																	1
mouse	Q8R4Y4	1 - high confidence	2						1									1
mouse	Q8VCC9	1 - high confidence	2																			1	1
mouse	Q8VHN7	1 - high confidence	2											1										1
mouse	Q8VI51	1 - high confidence	2												1									1
mouse	Q91WR6	1 - high confidence	2								1																							1
mouse	Q91ZI0	1 - high confidence	2												1											1
mouse	Q91ZV7	1 - high confidence	2																							1		1
mouse	Q920A5	1 - high confidence	2																				1	1
mouse	Q920C1	1 - high confidence	2																			1	1
mouse	Q99JG2	1 - high confidence	2						1													1
mouse	Q99M71	1 - high confidence	2																			1	1
mouse	Q99MQ4	1 - high confidence	2					1			1
mouse	Q99NH8	1 - high confidence	2														1	1
mouse	Q99PJ1	1 - high confidence	2																			1	1
mouse	Q9CXI3	1 - high confidence	2										1																1
mouse	Q9CZQ6	1 - high confidence	2																1	1
mouse	Q9D3A9	1 - high confidence	2						1												1
mouse	Q9D3X9	1 - high confidence	2						1											1
mouse	Q9DC11	1 - high confidence	2						1		1
mouse	Q9EPW9	1 - high confidence	2										1				1
mouse	Q9EQG7	1 - high confidence	2						1										1
mouse	Q9ER58	1 - high confidence	2											1	1
mouse	Q9ET39	1 - high confidence	2																											1	1
mouse	Q9JHX3	1 - high confidence	2																												1	1
mouse	Q9JJS0	1 - high confidence	2											1										1
mouse	Q9QY40	1 - high confidence	2										1							1
mouse	Q9QY96	1 - high confidence	2																1					1
mouse	Q9R0R1	1 - high confidence	2						1										1
mouse	Q9R0Y8	1 - high confidence	2																			1	1
mouse	Q9R216	1 - high confidence	2																			1	1
mouse	Q9Z0M3	1 - high confidence	2																		1	1
mouse	Q9Z100	1 - high confidence	2																			1		1
mouse	A2ARA8	1 - high confidence	1																	1
mouse	A2AVA0	1 - high confidence	1																				1
mouse	O08604	1 - high confidence	1											1
mouse	O08742	1 - high confidence	1																												1
mouse	O08852	1 - high confidence	1																				1
mouse	O35118	1 - high confidence	1																1
mouse	O35659	1 - high confidence	1																1
mouse	O35975	1 - high confidence	1																												1
mouse	O88186	1 - high confidence	1																												1
mouse	P01904	1 - high confidence	1																											1
mouse	P04223	1 - high confidence	1							1
mouse	P04426	1 - high confidence	1											1
mouse	P04769	1 - high confidence	1																					1
mouse	P11032	1 - high confidence	1																													1
mouse	P11911	1 - high confidence	1																											1
mouse	P13504	1 - high confidence	1																1
mouse	P16305	1 - high confidence	1												1
mouse	P19070	1 - high confidence	1																											1
mouse	P19437	1 - high confidence	1																												1
mouse	P20334	1 - high confidence	1																													1
mouse	P20489	1 - high confidence	1							1
mouse	P20826	1 - high confidence	1																	1
mouse	P21844	1 - high confidence	1					1
mouse	P22723	1 - high confidence	1												1
mouse	P23818	1 - high confidence	1												1
mouse	P26049	1 - high confidence	1												1
mouse	P28654	1 - high confidence	1																							1
mouse	P28665	1 - high confidence	1					1
mouse	P29319	1 - high confidence	1											1
mouse	P33146	1 - high confidence	1							1
mouse	P34968	1 - high confidence	1												1
mouse	P35374	1 - high confidence	1												1
mouse	P35436	1 - high confidence	1									1
mouse	P41047	1 - high confidence	1																													1
mouse	P47746	1 - high confidence	1												1
mouse	P47878	1 - high confidence	1																					1
mouse	P47936	1 - high confidence	1																											1
mouse	P50427	1 - high confidence	1																				1
mouse	P50608	1 - high confidence	1						1
mouse	P51885	1 - high confidence	1						1
mouse	P54754	1 - high confidence	1								1
mouse	P57096	1 - high confidence	1											1
mouse	P58659	1 - high confidence	1						1
mouse	P61793	1 - high confidence	1						1
mouse	P63080	1 - high confidence	1												1
mouse	P70180	1 - high confidence	1											1
mouse	P80560	1 - high confidence	1																1
mouse	P82347	1 - high confidence	1					1
mouse	P97321	1 - high confidence	1												1
mouse	P97717	1 - high confidence	1												1
mouse	P97793	1 - high confidence	1												1
mouse	P98064	1 - high confidence	1																														1
mouse	P98154	1 - high confidence	1																									1
mouse	Q01097	1 - high confidence	1												1
mouse	Q01338	1 - high confidence	1																1
mouse	Q02858	1 - high confidence	1								1
mouse	Q03311	1 - high confidence	1																				1
mouse	Q05BQ1	1 - high confidence	1			1
mouse	Q0PMG2	1 - high confidence	1												1
mouse	Q3TR08	1 - high confidence	1						1
mouse	Q3TXX4	1 - high confidence	1																											1
mouse	Q3U0X8	1 - high confidence	1																												1
mouse	Q3U1J0	1 - high confidence	1																1
mouse	Q3U284	1 - high confidence	1						1
mouse	Q4VAH7	1 - high confidence	1																1
mouse	Q504P2	1 - high confidence	1						1
mouse	Q60614	1 - high confidence	1																			1
mouse	Q60673	1 - high confidence	1																1
mouse	Q60675	1 - high confidence	1					1
mouse	Q60677	1 - high confidence	1																											1
mouse	Q60837	1 - high confidence	1																														1
mouse	Q60963	1 - high confidence	1																				1
mouse	Q61190	1 - high confidence	1																	1
mouse	Q61468	1 - high confidence	1																										1
mouse	Q61508	1 - high confidence	1																													1
mouse	Q61559	1 - high confidence	1															1
mouse	Q61824	1 - high confidence	1																				1
mouse	Q62009	1 - high confidence	1																	1
mouse	Q62035	1 - high confidence	1						1
mouse	Q63994	1 - high confidence	1														1
mouse	Q64326	1 - high confidence	1												1
mouse	Q64444	1 - high confidence	1																						1
mouse	Q64527	1 - high confidence	1																					1
mouse	Q68ED2	1 - high confidence	1												1
mouse	Q69ZS6	1 - high confidence	1												1
mouse	Q6AXF6	1 - high confidence	1																											1
mouse	Q6GQT1	1 - high confidence	1																									1
mouse	Q6GQU6	1 - high confidence	1																	1
mouse	Q6NXM3	1 - high confidence	1												1
mouse	Q78IQ7	1 - high confidence	1																							1
mouse	Q7TSK2	1 - high confidence	1												1
mouse	Q80TG9	1 - high confidence	1																												1
mouse	Q80UG2	1 - high confidence	1												1
mouse	Q80Z10	1 - high confidence	1												1
mouse	Q8BGN8	1 - high confidence	1																1
mouse	Q8BHE5	1 - high confidence	1																				1
mouse	Q8BJD1	1 - high confidence	1											1
mouse	Q8BLX7	1 - high confidence	1																										1
mouse	Q8C3Q5	1 - high confidence	1												1
mouse	Q8C419	1 - high confidence	1																1
mouse	Q8C6Z1	1 - high confidence	1																			1
mouse	Q8C8R3	1 - high confidence	1						1
mouse	Q8CAE9	1 - high confidence	1												1
mouse	Q8CB67	1 - high confidence	1												1
mouse	Q8CI19	1 - high confidence	1											1
mouse	Q8CI85	1 - high confidence	1			1
mouse	Q8K4G1	1 - high confidence	1											1
mouse	Q8K4Z0	1 - high confidence	1												1
mouse	Q8R0I0	1 - high confidence	1						1
mouse	Q8R2G6	1 - high confidence	1																				1
mouse	Q8VCJ6	1 - high confidence	1																	1
mouse	Q8VD31	1 - high confidence	1																													1
mouse	Q8VHP6	1 - high confidence	1																1
mouse	Q91VF5	1 - high confidence	1											1
mouse	Q91YY5	1 - high confidence	1						1
mouse	Q925F2	1 - high confidence	1																							1
mouse	Q99P47	1 - high confidence	1												1
mouse	Q99PI8	1 - high confidence	1																	1
mouse	Q9CQN4	1 - high confidence	1																				1
mouse	Q9D387	1 - high confidence	1												1
mouse	Q9D6W7	1 - high confidence	1																1
mouse	Q9D780	1 - high confidence	1															1
mouse	Q9D7S0	1 - high confidence	1																1
mouse	Q9DAY5	1 - high confidence	1																				1
mouse	Q9DBY4	1 - high confidence	1																				1
mouse	Q9EP96	1 - high confidence	1						1
mouse	Q9EPK8	1 - high confidence	1										1
mouse	Q9EPT5	1 - high confidence	1						1
mouse	Q9EQD0	1 - high confidence	1																							1
mouse	Q9ER65	1 - high confidence	1												1
mouse	Q9ERB5	1 - high confidence	1						1
mouse	Q9ES57	1 - high confidence	1															1
mouse	Q9ESG4	1 - high confidence	1																1
mouse	Q9JHE3	1 - high confidence	1						1
mouse	Q9JL18	1 - high confidence	1																1
mouse	Q9JLL0	1 - high confidence	1												1
mouse	Q9JMB8	1 - high confidence	1												1
mouse	Q9QUN9	1 - high confidence	1																									1
mouse	Q9QXH4	1 - high confidence	1																											1
mouse	Q9QZJ6	1 - high confidence	1					1
mouse	Q9R0M4	1 - high confidence	1						1
mouse	Q9Z0J1	1 - high confidence	1										1
mouse	Q9Z0L1	1 - high confidence	1																											1
mouse	Q9Z139	1 - high confidence	1						1
mouse	Q9Z1P8	1 - high confidence	1																			1
mouse	Q9Z2I4	1 - high confidence	1													1
mouse	Q8BY89	2 - putative	31	1	1	1	1	1	1	1	1	1	1	1	1	1	1	1	1	1	1	1	1	1	1	1	1	1	1	1	1	1	1	1
mouse	O09117	2 - putative	30	1	1	1	1	1	1	1	1	1	1	1	1	1	1	1	1	1	1	1	1	1	1	1		1	1	1	1	1	1	1
mouse	O35114	2 - putative	29	1	1	1	1	1	1	1	1	1	1	1	1	1			1	1	1	1	1	1	1	1	1	1	1	1	1	1	1	1
mouse	P32037	2 - putative	29	1	1	1	1	1	1	1	1	1	1	1	1	1	1		1	1	1	1	1	1	1	1	1	1		1	1	1	1	1
mouse	Q5FWI3	2 - putative	29	1	1	1	1	1	1	1	1	1	1	1	1	1	1	1	1	1	1	1		1	1	1		1	1	1	1	1	1	1
mouse	Q8C0Z1	2 - putative	29	1	1	1	1	1	1	1	1	1	1	1	1		1	1	1	1	1	1	1	1	1	1		1	1	1	1	1	1	1
mouse	Q9JIS8	2 - putative	29	1	1	1	1	1	1	1	1	1	1	1	1	1	1	1	1	1	1	1	1	1	1	1		1	1		1	1	1	1
mouse	O35874	2 - putative	28	1	1	1	1		1	1	1	1	1	1	1	1	1	1	1	1	1	1	1	1	1	1	1	1	1	1		1		1
mouse	Q9CQX5	2 - putative	28	1	1	1	1	1	1	1	1	1	1	1	1		1	1	1	1	1	1	1		1	1		1	1	1	1	1	1	1
mouse	P55012	2 - putative	26	1	1	1	1		1	1	1	1	1	1	1	1			1	1	1	1	1	1	1	1	1	1		1		1	1	1
mouse	Q3TDQ1	2 - putative	25	1	1	1	1	1		1	1	1	1	1	1				1	1	1	1	1	1	1	1		1	1	1		1	1	1
mouse	Q9JKZ2	2 - putative	23			1	1		1		1	1	1	1	1	1	1		1	1	1	1	1	1		1	1	1	1			1	1	1
mouse	P46978	2 - putative	23	1	1	1	1		1		1	1	1	1	1		1		1		1	1	1	1	1	1		1	1			1	1	1
mouse	O70401	2 - putative	22	1	1	1	1	1	1		1	1	1	1	1				1		1	1	1	1	1	1		1				1	1	1
mouse	Q9CQ88	2 - putative	22	1	1	1	1		1		1	1	1	1				1	1	1	1	1	1	1	1	1		1				1	1	1
mouse	Q9D8C2	2 - putative	22		1		1	1	1		1	1	1	1	1	1			1		1	1	1	1		1		1		1	1	1	1	1
mouse	Q9QY33	2 - putative	22			1	1	1	1	1	1	1	1	1	1				1	1	1	1	1	1		1		1	1			1	1	1
mouse	P41233	2 - putative	21		1	1	1	1	1		1	1	1	1	1		1	1	1	1	1	1	1			1		1		1				1
mouse	Q3UHK6	2 - putative	21	1	1	1	1	1	1		1	1	1	1	1				1	1	1		1	1	1	1		1	1					1
mouse	Q8C170	2 - putative	21	1	1	1	1		1	1	1	1	1	1	1				1	1	1	1	1	1	1	1		1						1
mouse	P56528	2 - putative	20	1	1		1	1	1		1	1		1						1	1			1		1	1	1	1	1	1	1	1	1
mouse	Q5XF89	2 - putative	20				1		1		1	1	1		1		1		1	1	1	1	1	1		1		1	1		1	1	1	1
mouse	Q8BSM7	2 - putative	20	1	1	1	1	1			1	1	1	1	1	1					1			1	1	1		1		1	1	1		1
mouse	Q08857	2 - putative	19	1		1		1	1			1		1	1		1	1		1	1	1	1	1	1	1				1	1			1
mouse	Q9WTS6	2 - putative	19	1	1	1			1	1	1	1	1	1	1	1			1	1		1		1	1	1		1						1
mouse	O55026	2 - putative	18	1	1	1		1	1			1	1	1					1	1		1			1	1		1	1	1	1			1
mouse	Q09143	2 - putative	18				1		1		1	1	1	1			1		1	1	1	1	1			1		1	1			1	1	1
mouse	Q3TWI9	2 - putative	18	1	1	1			1		1	1	1	1	1						1	1	1	1	1	1		1				1		1
mouse	Q60928	2 - putative	18	1	1	1	1	1	1		1	1	1							1	1				1	1		1		1	1	1		1
mouse	P51830	2 - putative	17				1	1	1		1	1	1		1				1	1	1	1	1	1		1		1	1					1
mouse	P56564	2 - putative	17		1	1		1	1	1	1		1		1						1	1	1		1	1		1	1	1				1
mouse	P56677	2 - putative	17	1	1		1		1		1	1		1			1		1						1	1		1		1	1	1	1	1
mouse	Q6PD26	2 - putative	17		1	1			1		1		1	1	1	1					1	1	1	1		1		1	1			1	1
mouse	P43006	2 - putative	16		1	1			1				1	1	1	1			1		1	1	1	1	1		1		1	1
mouse	P47801	2 - putative	16				1	1	1	1	1		1				1		1	1		1				1		1			1	1	1	1
mouse	P57757	2 - putative	16	1	1	1			1		1		1	1	1					1	1	1	1	1	1	1		1
mouse	Q3UUQ7	2 - putative	16	1	1	1			1		1			1	1	1					1	1	1	1	1	1		1				1
mouse	Q68FE2	2 - putative	16			1	1		1		1			1	1	1					1	1	1	1		1		1				1	1	1
mouse	Q8K4Q8	2 - putative	16	1			1		1	1	1	1		1	1		1	1						1	1	1		1	1					1
mouse	Q5DU41	2 - putative	15	1	1	1			1		1	1	1	1	1					1	1	1	1	1	1
mouse	Q62273	2 - putative	15	1	1	1	1			1	1		1				1		1	1				1	1	1		1						1
mouse	Q69ZQ1	2 - putative	15	1	1	1			1		1	1		1						1	1	1	1	1	1	1		1
mouse	Q6P2L7	2 - putative	15				1				1		1	1	1				1		1	1	1	1		1		1	1			1		1
mouse	Q921T2	2 - putative	15				1		1		1		1	1	1						1	1	1	1		1					1	1	1	1
mouse	Q9JJX6	2 - putative	15					1	1				1	1	1			1	1	1		1	1					1	1	1	1	1
mouse	P70699	2 - putative	14		1						1		1	1	1				1			1	1	1	1	1		1	1			1
mouse	Q80X71	2 - putative	14	1	1						1			1	1							1	1	1	1			1		1		1	1	1
mouse	Q8BHN0	2 - putative	14				1		1		1		1	1	1						1	1	1	1		1		1	1					1
mouse	Q8VBW1	2 - putative	14						1		1	1	1	1	1		1			1	1	1	1	1		1		1
mouse	Q9WTN6	2 - putative	14	1	1	1						1			1					1	1	1	1	1	1			1				1		1
mouse	P55772	2 - putative	13					1	1					1	1		1	1			1	1		1						1	1	1	1
mouse	Q68FD9	2 - putative	13	1		1			1				1	1	1	1				1		1		1	1	1			1
mouse	Q69ZN6	2 - putative	13				1				1		1	1	1				1			1	1			1		1	1			1		1
mouse	Q9R0A1	2 - putative	13	1	1		1		1		1			1	1							1	1	1		1		1						1
mouse	P39098	2 - putative	12				1				1	1	1	1	1							1	1	1		1		1						1
mouse	Q80WQ6	2 - putative	12					1	1				1				1	1	1	1									1	1	1	1	1
mouse	Q8BYI8	2 - putative	12											1	1	1	1		1	1	1	1	1	1				1	1
mouse	Q8K385	2 - putative	12		1		1				1	1					1			1				1		1		1	1			1		1
mouse	Q9D771	2 - putative	12		1				1		1		1					1	1	1					1	1				1		1		1
mouse	P40237	2 - putative	11				1	1	1	1			1				1		1										1		1	1	1
mouse	Q3TBN1	2 - putative	11	1	1		1				1				1							1			1	1		1	1					1
mouse	Q3UDW8	2 - putative	11		1				1					1	1				1			1	1	1	1	1		1
mouse	Q80V26	2 - putative	11		1							1		1					1			1	1	1	1	1						1		1
mouse	Q8BJU2	2 - putative	11				1				1			1					1	1		1	1	1		1		1						1
mouse	Q8VBZ3	2 - putative	11								1		1						1	1	1	1	1	1		1		1						1
mouse	Q9D7N9	2 - putative	11		1				1					1	1						1	1	1	1				1	1			1
mouse	Q9EQJ0	2 - putative	11						1		1			1			1	1			1	1	1					1	1			1
mouse	O35566	2 - putative	10	1					1			1	1						1	1	1	1			1	1
mouse	P30204	2 - putative	10				1	1	1		1						1	1			1					1				1				1
mouse	Q3UHH2	2 - putative	10						1				1		1	1			1	1	1	1	1	1
mouse	Q80WG5	2 - putative	10	1					1				1						1	1	1				1				1			1	1
mouse	Q8BHJ6	2 - putative	10				1		1		1									1	1	1	1	1		1								1
mouse	Q8BJS4	2 - putative	10											1	1						1	1	1			1		1	1			1	1
mouse	Q8VCF1	2 - putative	10				1				1			1								1	1	1		1		1				1		1
mouse	Q9D666	2 - putative	10	1	1	1									1							1	1	1	1	1		1
mouse	Q9Z222	2 - putative	10		1		1				1	1	1											1				1				1	1	1
mouse	O88627	2 - putative	9						1					1			1	1							1					1	1	1	1
mouse	P28571	2 - putative	9						1		1		1						1	1	1	1	1			1
mouse	Q8BH31	2 - putative	9			1					1										1	1	1	1		1		1						1
mouse	Q8K0B2	2 - putative	9				1				1				1							1	1	1				1				1		1
mouse	Q9Z218	2 - putative	9	1					1						1						1	1	1	1	1			1
mouse	A2AVZ9	2 - putative	8					1	1									1								1				1		1	1	1
mouse	P51912	2 - putative	8				1	1			1	1					1									1						1		1
mouse	Q3TCT4	2 - putative	8				1				1		1	1	1									1				1						1
mouse	Q3TDN0	2 - putative	8						1		1		1		1				1	1	1					1
mouse	Q3UP23	2 - putative	8						1					1	1						1					1		1		1	1
mouse	Q61029	2 - putative	8						1			1		1											1	1		1				1	1
mouse	Q64302	2 - putative	8				1		1	1	1		1							1						1								1
mouse	Q64687	2 - putative	8											1								1	1	1	1	1		1				1
mouse	Q8BGQ4	2 - putative	8											1	1	1					1	1	1	1				1
mouse	Q8BXA5	2 - putative	8				1				1										1	1	1	1				1				1
mouse	Q8VEK0	2 - putative	8						1									1	1	1			1							1		1		1
mouse	Q91W98	2 - putative	8				1				1									1		1	1	1				1						1
mouse	Q9WVL6	2 - putative	8				1				1				1							1	1	1		1		1
mouse	Q61451	2 - putative	7						1									1									1			1	1	1	1
mouse	O35454	2 - putative	7											1	1							1	1	1		1		1
mouse	P27046	2 - putative	7		1								1	1										1		1		1						1
mouse	Q3UHK1	2 - putative	7						1						1				1		1	1	1	1
mouse	Q640M6	2 - putative	7			1			1					1	1							1	1	1
mouse	Q6ZQE4	2 - putative	7		1									1								1	1	1		1		1
mouse	Q9Z2E9	2 - putative	7											1	1							1	1	1				1				1
mouse	O35405	2 - putative	6												1				1			1	1	1								1
mouse	P41234	2 - putative	6											1	1							1	1	1				1
mouse	Q61115	2 - putative	6		1				1			1								1						1		1
mouse	Q7TT15	2 - putative	6				1				1			1	1							1												1
mouse	Q8BUB6	2 - putative	6				1				1											1	1	1										1
mouse	Q8BYU6	2 - putative	6		1																	1	1	1		1			1
mouse	Q8C3X8	2 - putative	6								1										1	1	1						1			1
mouse	Q8K0E3	2 - putative	6				1				1	1														1		1						1
mouse	Q8VHK9	2 - putative	6						1					1	1				1							1		1
mouse	Q920V1	2 - putative	6				1				1				1								1					1						1
mouse	Q921R7	2 - putative	6				1				1											1	1			1								1
mouse	Q922J6	2 - putative	6				1				1								1	1						1								1
mouse	Q99JY8	2 - putative	6						1				1							1	1	1	1
mouse	Q9JLZ8	2 - putative	6				1				1								1							1		1				1
mouse	Q9Z1M7	2 - putative	6											1	1							1	1	1				1
mouse	O70472	2 - putative	5											1	1								1	1				1
mouse	P21855	2 - putative	5						1								1	1												1	1
mouse	P31650	2 - putative	5			1									1						1	1	1
mouse	P37217	2 - putative	5						1																					1	1	1	1
mouse	Q01341	2 - putative	5						1										1	1	1			1
mouse	Q02013	2 - putative	5					1	1	1																1					1
mouse	Q0P5V9	2 - putative	5								1	1								1	1								1
mouse	Q3TVI8	2 - putative	5				1												1		1	1	1
mouse	Q3UF25	2 - putative	5				1				1		1																1			1
mouse	Q3UVK0	2 - putative	5				1				1											1	1	1
mouse	Q61470	2 - putative	5														1	1												1		1	1
mouse	Q7TPV4	2 - putative	5		1	1						1													1			1
mouse	Q8BLV3	2 - putative	5						1						1				1			1	1
mouse	Q8K2W3	2 - putative	5																			1	1	1				1				1
mouse	Q8R4G6	2 - putative	5						1				1	1					1										1
mouse	Q8R502	2 - putative	5						1		1									1				1					1
mouse	Q9EQC4	2 - putative	5												1				1			1	1	1
mouse	A2AJQ3	2 - putative	4					1						1	1								1
mouse	O55192	2 - putative	4			1		1	1															1
mouse	O88662	2 - putative	4						1											1		1				1
mouse	P01851	2 - putative	4																											1	1	1	1
mouse	P11370	2 - putative	4						1										1			1	1
mouse	P16406	2 - putative	4				1	1											1						1
mouse	P49282	2 - putative	4				1				1															1								1
mouse	P49300	2 - putative	4					1									1	1													1
mouse	Q01237	2 - putative	4																		1	1	1	1
mouse	Q60660	2 - putative	4						1								1												1	1
mouse	Q62283	2 - putative	4												1				1			1	1
mouse	Q6GQT6	2 - putative	4						1						1							1	1
mouse	Q80VP8	2 - putative	4																			1	1		1							1
mouse	Q80Z60	2 - putative	4						1				1						1			1
mouse	Q8BG19	2 - putative	4											1	1									1				1
mouse	Q91VA1	2 - putative	4	1	1																				1	1
mouse	Q91YT8	2 - putative	4											1						1						1		1
mouse	Q99LL3	2 - putative	4								1												1	1								1
mouse	Q9DAX2	2 - putative	4								1		1						1										1
mouse	Q9ES07	2 - putative	4						1												1	1	1
mouse	Q9JIP7	2 - putative	4		1						1	1														1
mouse	Q9R1S3	2 - putative	4								1											1	1					1
mouse	P01849	2 - putative	3																												1	1	1
mouse	P01895	2 - putative	3														1			1										1
mouse	P41155	2 - putative	3																												1	1	1
mouse	P62956	2 - putative	3						1											1			1
mouse	Q3TB48	2 - putative	3																1			1	1
mouse	Q62205	2 - putative	3											1	1				1
mouse	Q6PIX5	2 - putative	3						1				1									1
mouse	Q80YY7	2 - putative	3						1				1																1
mouse	Q8BG07	2 - putative	3						1																					1	1
mouse	Q8CHX6	2 - putative	3																			1	1			1
mouse	Q8CIV2	2 - putative	3		1																	1	1
mouse	Q8CJ91	2 - putative	3					1																						1	1
mouse	Q8VEC4	2 - putative	3						1				1							1
mouse	Q9CQD8	2 - putative	3				1				1												1
mouse	Q9DBP0	2 - putative	3	1																				1	1
mouse	Q9Z1X2	2 - putative	3																			1	1					1
mouse	O35219	2 - putative	2												1					1
mouse	O54905	2 - putative	2					1	1
mouse	P04441	2 - putative	2																											1	1
mouse	P13808	2 - putative	2																	1										1
mouse	P51576	2 - putative	2																	1											1
mouse	Q5U4D8	2 - putative	2								1															1
mouse	Q765H6	2 - putative	2												1									1
mouse	Q80WV3	2 - putative	2																			1	1
mouse	Q80XL7	2 - putative	2																									1				1
mouse	Q8BFZ2	2 - putative	2												1									1
mouse	Q8BG16	2 - putative	2								1				1
mouse	Q8BGQ6	2 - putative	2																				1					1
mouse	Q8BMD6	2 - putative	2																			1	1
mouse	Q8BX35	2 - putative	2											1														1
mouse	Q8BXJ9	2 - putative	2																			1	1
mouse	Q8C310	2 - putative	2	1		1
mouse	Q8K0L3	2 - putative	2						1											1
mouse	Q8K1B9	2 - putative	2								1								1
mouse	Q8R420	2 - putative	2												1							1
mouse	Q9CZR2	2 - putative	2					1		1
mouse	Q9DBZ1	2 - putative	2																			1	1
mouse	Q9QZ15	2 - putative	2						1								1
mouse	Q9WUB7	2 - putative	2																					1										1
mouse	O55017	2 - putative	1												1
mouse	O88829	2 - putative	1																					1
mouse	P04227	2 - putative	1																											1
mouse	P11881	2 - putative	1																													1
mouse	P18581	2 - putative	1						1
mouse	P31651	2 - putative	1																1
mouse	P32972	2 - putative	1																														1
mouse	P41274	2 - putative	1																1
mouse	P51906	2 - putative	1																									1
mouse	P55088	2 - putative	1						1
mouse	Q02789	2 - putative	1					1
mouse	Q60754	2 - putative	1						1
mouse	Q64518	2 - putative	1																1
mouse	Q64689	2 - putative	1												1
mouse	Q6NXK7	2 - putative	1												1
mouse	Q7TN60	2 - putative	1																												1
mouse	Q80UM7	2 - putative	1																1
mouse	Q80UW0	2 - putative	1												1
mouse	Q80WR1	2 - putative	1			1
mouse	Q8BGD6	2 - putative	1								1
mouse	Q8BH18	2 - putative	1						1
mouse	Q8BHG3	2 - putative	1																									1
mouse	Q8BRU6	2 - putative	1												1
mouse	Q8BS35	2 - putative	1																				1
mouse	Q8BZ00	2 - putative	1															1
mouse	Q8BZF2	2 - putative	1																							1
mouse	Q8C561	2 - putative	1										1
mouse	Q8C9E8	2 - putative	1																												1
mouse	Q8CBX0	2 - putative	1												1
mouse	Q8CIP5	2 - putative	1												1
mouse	Q8K224	2 - putative	1														1
mouse	Q8K449	2 - putative	1						1
mouse	Q8K595	2 - putative	1																											1
mouse	Q8QZW3	2 - putative	1																1
mouse	Q8R1C0	2 - putative	1																		1
mouse	Q8VCA5	2 - putative	1																1
mouse	Q8VHW3	2 - putative	1									1
mouse	Q91VU1	2 - putative	1																1
mouse	Q91W10	2 - putative	1																1
mouse	Q921V7	2 - putative	1																1
mouse	Q99J59	2 - putative	1																1
mouse	Q99PN0	2 - putative	1								1
mouse	Q9JJI6	2 - putative	1																				1
mouse	Q9JL99	2 - putative	1																												1
mouse	Q9JMI0	2 - putative	1												1
mouse	Q9QUT0	2 - putative	1					1
mouse	Q9R1X5	2 - putative	1																	1
mouse	Q9Z306	2 - putative	1						1
mouse	Q9JKR6	3 - unspecific	25	1	1	1	1		1		1	1	1	1	1	1	1		1		1	1	1	1	1	1	1	1	1			1	1	1
mouse	P16858	3 - unspecific	24		1	1			1	1		1	1	1	1		1	1	1	1	1	1	1	1	1	1		1	1		1	1	1	1
mouse	P97449	3 - unspecific	24	1	1	1	1	1	1	1	1	1	1	1	1		1	1	1	1				1	1	1		1	1		1	1		1
mouse	P08113	3 - unspecific	23		1	1	1		1	1	1	1	1	1	1		1		1	1		1	1	1	1	1	1	1				1	1	1
mouse	P17439	3 - unspecific	23		1	1	1	1			1			1	1	1	1		1	1	1	1	1	1	1	1		1	1	1	1	1		1
mouse	Q9WV54	3 - unspecific	22		1	1	1	1	1		1	1		1	1				1		1	1	1	1	1	1		1	1	1	1	1		1
mouse	Q9Z2C9	3 - unspecific	22	1	1	1	1		1	1	1		1	1	1	1			1	1	1	1	1	1	1	1		1		1				1
mouse	Q80TE4	3 - unspecific	21	1	1	1	1	1	1		1	1	1						1	1	1			1	1	1		1	1		1	1	1	1
mouse	Q9QXL1	3 - unspecific	21	1	1	1	1		1	1	1	1	1	1	1				1	1	1	1	1		1	1						1	1	1
mouse	P35980	3 - unspecific	20	1	1	1	1		1			1	1	1	1	1	1		1		1	1		1	1	1		1				1		1
mouse	P43274	3 - unspecific	20	1	1	1	1		1	1		1		1	1	1			1		1	1	1	1	1	1		1				1	1
mouse	P51410	3 - unspecific	20	1	1	1	1		1			1	1	1			1		1	1	1			1	1	1		1	1		1	1	1
mouse	P52480	3 - unspecific	20		1	1	1	1	1	1	1	1	1	1			1			1		1	1		1	1		1				1	1	1
mouse	Q91XA2	3 - unspecific	20	1	1	1	1				1	1		1	1	1			1		1	1	1	1	1	1		1	1			1		1
mouse	Q8R3H7	3 - unspecific	19			1	1		1		1		1	1	1	1			1		1	1	1	1	1	1		1	1			1		1
mouse	P35441	3 - unspecific	18			1	1		1	1	1			1				1		1		1		1		1		1	1	1	1	1	1	1
mouse	P14115	3 - unspecific	17	1	1	1			1			1	1	1	1	1			1		1	1	1	1	1	1		1
mouse	P15864	3 - unspecific	17	1	1	1	1				1			1	1	1						1	1	1	1	1		1				1	1	1
mouse	P58252	3 - unspecific	17		1		1		1			1	1	1	1		1		1	1	1	1	1	1				1				1		1
mouse	P99024	3 - unspecific	17		1	1	1				1	1		1	1	1	1		1		1	1	1	1	1			1						1
mouse	Q60930	3 - unspecific	17	1	1	1	1		1		1	1	1	1			1		1		1	1	1		1	1		1
mouse	Q9CQF9	3 - unspecific	16		1		1		1		1			1	1	1					1	1	1	1		1		1	1			1		1
mouse	Q9R0E1	3 - unspecific	16		1	1				1				1	1				1		1	1	1	1	1	1		1	1			1		1
mouse	Q8K297	3 - unspecific	14		1	1	1				1			1							1	1	1	1	1	1	1	1						1
mouse	P11499	3 - unspecific	14		1				1	1	1	1	1	1			1		1			1	1		1	1		1
mouse	P27659	3 - unspecific	14				1		1	1		1	1	1	1	1	1			1				1	1			1				1
mouse	P62242	3 - unspecific	14			1	1		1	1	1	1		1			1			1		1			1			1			1	1
mouse	P63017	3 - unspecific	14		1	1	1		1		1	1	1	1	1		1				1				1	1		1
mouse	P63038	3 - unspecific	14				1		1		1	1	1	1			1		1			1	1		1	1		1						1
mouse	Q60715	3 - unspecific	14		1	1	1				1			1			1					1	1	1	1	1		1				1		1
mouse	P07901	3 - unspecific	13		1				1	1		1	1	1	1		1		1					1	1			1				1
mouse	Q9R0B9	3 - unspecific	13				1				1		1	1						1		1	1	1		1		1	1				1	1
mouse	Q8VEK3	3 - unspecific	12		1				1			1		1	1		1			1		1	1			1		1				1
mouse	Q9D8E6	3 - unspecific	12						1			1		1	1		1			1			1	1	1	1		1				1
mouse	P99027	3 - unspecific	11		1		1		1		1	1		1						1					1	1						1		1
mouse	Q922Q6	3 - unspecific	11		1	1			1					1								1	1	1		1		1	1					1
mouse	Q9R0E2	3 - unspecific	11		1		1				1		1	1								1	1	1		1		1						1
mouse	P09405	3 - unspecific	10		1							1	1	1						1	1	1			1			1				1
mouse	P19324	3 - unspecific	10						1	1	1	1	1	1							1		1		1				1
mouse	P29416	3 - unspecific	10			1							1	1					1			1	1		1	1		1				1
mouse	P62267	3 - unspecific	10				1		1			1		1		1								1				1			1	1		1
mouse	P68372	3 - unspecific	10				1		1	1	1				1					1					1	1			1					1
mouse	Q62318	3 - unspecific	10		1		1		1		1	1		1											1	1		1						1
mouse	Q6NSU3	3 - unspecific	10				1				1		1	1					1		1		1			1						1		1
mouse	P06797	3 - unspecific	9								1			1		1						1	1	1		1		1						1
mouse	P24369	3 - unspecific	9						1			1	1	1	1							1	1	1				1
mouse	Q8R180	3 - unspecific	9	1	1	1																1	1		1				1			1	1
mouse	Q99JP7	3 - unspecific	9						1				1		1	1						1	1	1		1								1
mouse	O55142	3 - unspecific	8			1	1				1	1		1			1						1									1
mouse	P21661	3 - unspecific	8						1						1	1	1		1	1						1		1
mouse	P50580	3 - unspecific	8				1		1		1	1	1	1														1				1
mouse	P62911	3 - unspecific	8						1			1		1		1				1				1				1				1
mouse	P84104	3 - unspecific	8		1				1			1		1								1	1		1			1
mouse	Q812F8	3 - unspecific	8								1			1								1	1	1	1	1		1
mouse	Q8CFG0	3 - unspecific	8		1									1	1							1	1	1		1		1
mouse	Q8K2B0	3 - unspecific	8				1							1	1							1	1	1		1		1
mouse	Q91Z92	3 - unspecific	8											1					1		1	1	1	1				1				1
mouse	Q921V5	3 - unspecific	8				1				1			1	1							1	1			1		1
mouse	Q99J85	3 - unspecific	8	1	1						1				1				1						1	1		1
mouse	O09159	3 - unspecific	7												1				1			1	1	1				1						1
mouse	O35129	3 - unspecific	7						1			1			1								1		1						1	1
mouse	P43277	3 - unspecific	7			1						1									1	1	1		1						1
mouse	Q61576	3 - unspecific	7				1				1											1	1	1		1		1
mouse	Q68FD5	3 - unspecific	7						1					1			1			1		1			1							1
mouse	Q8R0F3	3 - unspecific	7								1											1	1	1				1				1		1
mouse	Q99PP2	3 - unspecific	7			1	1					1		1	1								1										1
mouse	Q9CR89	3 - unspecific	7		1						1		1		1								1		1							1
mouse	Q9EP78	3 - unspecific	7											1							1	1	1	1	1	1
mouse	Q9JHP7	3 - unspecific	7								1			1								1	1	1		1		1
mouse	Q9JLB4	3 - unspecific	7	1	1	1						1		1										1	1
mouse	Q9Z2A9	3 - unspecific	7					1	1										1		1									1	1	1
mouse	P16381	3 - unspecific	6				1		1		1	1		1			1
mouse	P62245	3 - unspecific	6					1	1					1											1	1						1
mouse	Q6ZWV7	3 - unspecific	6				1					1					1							1	1			1
mouse	Q8BLF1	3 - unspecific	6				1				1											1	1									1		1
mouse	Q9D7J6	3 - unspecific	6						1				1				1	1	1	1
mouse	Q9ER38	3 - unspecific	6		1		1				1												1	1				1
mouse	O09167	3 - unspecific	5		1							1		1											1							1
mouse	O89023	3 - unspecific	5						1					1								1	1					1
mouse	P03995	3 - unspecific	5						1	1			1									1							1
mouse	P20060	3 - unspecific	5						1													1	1	1								1
mouse	P61315	3 - unspecific	5											1	1							1	1	1
mouse	Q8BYB9	3 - unspecific	5											1	1								1					1					1
mouse	Q8CGC7	3 - unspecific	5						1		1	1												1				1
mouse	Q8R2E9	3 - unspecific	5						1		1			1					1									1
mouse	Q9D6Z1	3 - unspecific	5											1							1		1		1			1
mouse	Q9EPK6	3 - unspecific	5																			1	1						1			1	1
mouse	Q9ER41	3 - unspecific	5											1								1	1	1				1
mouse	Q9R013	3 - unspecific	5								1											1	1	1										1
mouse	O35134	3 - unspecific	4								1											1	1					1
mouse	O88856	3 - unspecific	4		1						1															1								1
mouse	Q64737	3 - unspecific	4		1	1							1	1
mouse	Q6ZQ11	3 - unspecific	4					1						1									1	1
mouse	Q8VDX6	3 - unspecific	4								1											1	1	1
mouse	Q91Y74	3 - unspecific	4								1												1									1		1
mouse	Q91YY2	3 - unspecific	4		1						1															1								1
mouse	Q99L45	3 - unspecific	4									1		1														1				1
mouse	Q9CQN1	3 - unspecific	4								1	1		1	1
mouse	Q9D1R9	3 - unspecific	4						1	1				1			1
mouse	Q9D620	3 - unspecific	4				1				1						1	1
mouse	Q9EPL4	3 - unspecific	4											1								1	1	1
mouse	Q9JME2	3 - unspecific	4										1						1							1						1
mouse	Q9Z247	3 - unspecific	4		1																1				1	1
mouse	O09009	3 - unspecific	3								1																	1						1
mouse	O09010	3 - unspecific	3											1								1	1
mouse	O35696	3 - unspecific	3											1	1									1
mouse	O54904	3 - unspecific	3												1							1	1
mouse	P00186	3 - unspecific	3								1												1											1
mouse	P12265	3 - unspecific	3											1								1	1
mouse	P16675	3 - unspecific	3																			1	1									1
mouse	P42228	3 - unspecific	3											1								1	1
mouse	P51880	3 - unspecific	3						1												1		1
mouse	P54797	3 - unspecific	3										1									1	1
mouse	P55302	3 - unspecific	3								1															1								1
mouse	P62317	3 - unspecific	3									1		1																	1
mouse	P97315	3 - unspecific	3				1				1															1
mouse	Q05769	3 - unspecific	3				1																			1			1
mouse	Q2HXL6	3 - unspecific	3		1																				1							1
mouse	Q3UHH8	3 - unspecific	3		1																			1				1
mouse	Q6A058	3 - unspecific	3								1		1									1
mouse	Q8BFR4	3 - unspecific	3												1							1	1
mouse	Q8BH97	3 - unspecific	3		1						1																							1
mouse	Q8BWT1	3 - unspecific	3						1				1									1
mouse	Q91V92	3 - unspecific	3									1					1		1
mouse	Q9CPR4	3 - unspecific	3									1		1											1
mouse	Q9CZ42	3 - unspecific	3												1							1	1
mouse	Q9EPS3	3 - unspecific	3								1												1			1
mouse	A2ASS6	3 - unspecific	2				1													1
mouse	O08795	3 - unspecific	2																1	1
mouse	O70423	3 - unspecific	2					1			1
mouse	O88477	3 - unspecific	2									1		1
mouse	P04214	3 - unspecific	2																											1	1
mouse	P60335	3 - unspecific	2						1								1
mouse	P62821	3 - unspecific	2						1																			1
mouse	P97821	3 - unspecific	2																			1	1
mouse	Q09200	3 - unspecific	2												1																	1
mouse	Q3UMW8	3 - unspecific	2											1																		1
mouse	Q5F2L2	3 - unspecific	2											1									1
mouse	Q60716	3 - unspecific	2																						1	1
mouse	Q64467	3 - unspecific	2													1					1
mouse	Q7TMM9	3 - unspecific	2						1													1
mouse	Q8BHT6	3 - unspecific	2																			1	1
mouse	Q8CG48	3 - unspecific	2											1														1
mouse	Q8K3M5	3 - unspecific	2			1			1
mouse	Q8VHI3	3 - unspecific	2																		1											1
mouse	Q920P3	3 - unspecific	2						1						1
mouse	Q9DCX2	3 - unspecific	2																			1	1
mouse	Q9QWR8	3 - unspecific	2																1				1
mouse	A2A6M5	3 - unspecific	1										1
mouse	P06336	3 - unspecific	1																											1
mouse	P15089	3 - unspecific	1					1
mouse	P17918	3 - unspecific	1																		1
mouse	P50516	3 - unspecific	1																1
mouse	P58158	3 - unspecific	1																				1
mouse	P97313	3 - unspecific	1			1
mouse	Q01063	3 - unspecific	1																		1
mouse	Q3THE2	3 - unspecific	1						1
mouse	Q62086	3 - unspecific	1																				1
mouse	Q7TT23	3 - unspecific	1								1
mouse	Q8BM72	3 - unspecific	1																				1
mouse	Q8CFL8	3 - unspecific	1																1
mouse	Q8CG03	3 - unspecific	1														1
mouse	Q8K007	3 - unspecific	1																					1
mouse	Q91XQ0	3 - unspecific	1																1
mouse	Q922F4	3 - unspecific	1						1
mouse	Q9CQ75	3 - unspecific	1												1
mouse	Q9CQA3	3 - unspecific	1																	1
mouse	Q9CQT2	3 - unspecific	1																									1
mouse	Q9D1M4	3 - unspecific	1																													1
mouse	Q9D883	3 - unspecific	1														1
mouse	Q9ESJ0	3 - unspecific	1					1
mouse	Q9ESX5	3 - unspecific	1									1
mouse	Q9QYK5	3 - unspecific	1																					1

## Sheet: Table_D
organisme	celltype	# total cell surface proteins	# CSPA prot SEQUEST search	# CSPA prot SpectraST search	% increase	# CD prot	# non-CD	# CSPA prot high confidence	# CSPA prot putative	# CSPA prot unspecific
Human	786-O	137	114	130	0.140351	49	88	112	16	9
Human	A-431	352	261	322	0.233716	73	279	242	57	52
Human	Adipocytes human	336	296	320	0.0810811	82	255	260	44	32
Human	B-All	325	270	310	0.148148	116	209	255	50	20
Human	Braintumor	99	76	67	-0.118421	15	85	66	7	26
Human	CaLu-3	224	139	193	0.388489	50	174	167	28	29
Human	CD4+, CD25- Tcells	274	224	255	0.138393	100	174	214	35	25
Human	Glioblastoma exvivo	484	398	474	0.190955	97	387	376	67	41
Human	HBL-1	243	190	235	0.236842	76	167	171	42	30
Human	HCC4012	265	212	232	0.0943396	68	197	192	36	37
Human	HDLM-2	274	224	259	0.15625	79	195	193	43	38
Human	HEK	506	396	476	0.20202	81	425	329	79	98
Human	HeLa	375	280	357	0.275	73	302	260	53	62
Human	HL-60	194	148	181	0.222973	90	104	146	36	12
Human	hMSC	69	55	64	0.163636	29	40	59	8	2
Human	IMR-32	375	291	351	0.206186	55	320	231	63	81
Human	Jurkat	253	213	244	0.14554	83	170	188	45	20
Human	KM-H2	292	216	272	0.259259	73	222	194	42	56
Human	L-428	316	243	292	0.201646	82	234	218	48	50
Human	L-540	247	201	234	0.164179	78	169	179	41	27
Human	LN-18	511	396	494	0.247475	97	414	359	78	74
Human	LN-229	402	304	368	0.210526	78	324	283	54	65
Human	LNT-229	185	125	170	0.36	54	131	154	25	6
Human	Lymphoma	201	172	196	0.139535	98	103	164	22	15
Human	MedB-1	279	211	262	0.241706	86	193	189	49	41
Human	Melanoma Adh	367	275	341	0.24	69	298	243	55	69
Human	Melanoma NSph	483	362	466	0.287293	76	407	305	68	110
Human	NB4	254	205	248	0.209756	81	173	181	51	22
Human	NK cells	241	188	221	0.175532	92	149	182	27	32
Human	P493-6	309	262	284	0.0839695	84	225	227	36	46
Human	PASMC	284	242	254	0.0495868	74	210	217	37	30
Human	RD	466	373	458	0.227882	52	414	277	51	138
Human	Rh28	457	361	452	0.252078	57	400	265	52	140
Human	RH4	83	69	76	0.101449	25	58	67	13	3
Human	Ruch-2	413	329	391	0.18845	53	360	240	51	122
Human	SDM104	284	238	271	0.138655	73	211	228	44	12
Human	SDM34	128	101	112	0.108911	29	99	86	16	26
Human	SDM4	260	193	234	0.212435	67	193	211	21	28
Human	SDM5	264	225	252	0.12	69	195	221	33	10
Human	SU-DHL-6	215	189	212	0.121693	72	143	160	44	11
Human	SU4	222	178	204	0.146067	73	149	154	39	29
Human	T98G	420	312	398	0.275641	75	345	276	57	87
Human	U-2 OS	425	342	421	0.230994	69	356	286	51	88
Human	U-251 MG	629	493	609	0.235294	89	540	405	83	141
Human	U-87 MG	375	284	349	0.228873	68	307	242	57	76
Human	U2932	225	194	219	0.128866	78	147	171	39	15
Human	ZL55 MPM	351	254	310	0.220472	79	272	262	48	41
Mouse	159-2 EB	215	176	205	0.164773	56	159	158	42	15
Mouse	159-2 ES	274	211	257	0.218009	53	221	174	53	47
Mouse	159-2 NP	311	247	290	0.174089	59	252	232	44	35
Mouse	2D4-iPS	332	253	315	0.245059	75	257	220	65	47
Mouse	Adipocytes mouse	180	163	159	-0.0245399	57	123	130	39	11
Mouse	Astroglia	571	458	567	0.237991	115	456	412	100	59
Mouse	C2C12	139	107	128	0.196262	38	101	100	22	17
Mouse	D3_ES	459	354	447	0.262712	85	374	307	91	61
Mouse	E14Tg2a	282	222	254	0.144144	64	218	184	49	49
Mouse	GL261	351	277	338	0.220217	77	274	248	66	37
Mouse	J1_EB	507	372	482	0.295699	72	435	346	78	83
Mouse	J1_neurons	498	375	494	0.317333	64	434	361	92	45
Mouse	J1_NP	169	137	164	0.19708	35	134	131	20	18
Mouse	J774.2	211	153	199	0.300654	68	143	144	35	32
Mouse	Macrophages (BM-der.)	141	130	139	0.0692308	67	74	111	25	5
Mouse	Min6	374	307	366	0.192182	68	306	261	75	38
Mouse	MSC80	347	272	321	0.180147	66	281	256	65	26
Mouse	Neural stem cells (forebrain)	349	258	334	0.294574	56	293	246	69	34
Mouse	Neural stem cells (spinal cord)	514	381	507	0.330709	58	456	331	110	73
Mouse	Neural stem cells (SVZ)	487	357	479	0.341737	48	439	295	108	84
Mouse	R1_defNCS 2°	435	334	435	0.302395	65	370	286	92	57
Mouse	R1_EB	323	232	205	-0.116379	66	257	219	51	53
Mouse	R1_ES	459	353	443	0.254958	82	377	310	91	57
Mouse	R1_NP_4h	63	58	62	0.0689655	20	43	51	9	3
Mouse	R1_primNCS 1°	453	334	438	0.311377	74	379	288	95	70
Mouse	SMA560	258	210	243	0.157143	64	194	192	46	20
Mouse	Spleenocytes	206	190	199	0.0473684	91	115	156	43	7
Mouse	TH-0	219	181	210	0.160221	95	124	166	39	14
Mouse	TH-1	347	270	331	0.225926	101	246	222	71	54
Mouse	TH-17	209	183	203	0.10929	83	126	153	41	15
Mouse	TTF-1_iPS	366	292	359	0.229452	82	284	252	71	43

## Sheet: Table_E
Protein	A431	Adipocytes	B_ALL	braintumor	CaLu3	CD4pCD25n_Tcells	Glioblastoma	HBL1	HCC4012	HDLM2	HEK	HeLa	HL60	IMR32	Jurkat	KMH2	L428	L540	LN18	LN229	LNT229	lymphoma	MedB1	melanoma_adherent	melanoma_spheres	MSC	NB4	NK	P493_6	PASMC	RD	Rh28	Rh4	Ruch2	SDM104	SDM34	SDM4	SDM5	SU4	SUDHL6	T98G	U251	U2932	U2OS	U87	X786	ZL55
A1A5B4	16.5689	NA	NA	NA	NA	18.5985	NA	17.0327	NA	16.6953	NA	NA	NA	NA	NA	NA	NA	NA	NA	NA	NA	NA	17.4275	NA	NA	NA	NA	16.3234	NA	NA	NA	NA	NA	NA	NA	NA	NA	NA	NA	16.5783	NA	NA	NA	NA	NA	NA	18.7471
A1A5C7	NA	NA	NA	NA	NA	NA	16.4416	NA	NA	NA	17.7581	NA	NA	NA	NA	NA	NA	NA	NA	NA	NA	NA	NA	NA	NA	NA	NA	NA	NA	17.7912	NA	NA	NA	NA	17.1706	NA	NA	NA	NA	NA	NA	NA	NA	NA	NA	NA	NA
A2BFH1	NA	NA	NA	NA	NA	NA	NA	NA	NA	NA	NA	NA	NA	18.9015	NA	NA	17.1511	NA	NA	NA	NA	NA	NA	NA	NA	NA	NA	18.9015	NA	NA	NA	NA	NA	NA	NA	NA	NA	NA	NA	NA	NA	NA	NA	NA	NA	NA	NA
A2RU67	NA	NA	NA	NA	NA	NA	NA	NA	NA	NA	16.568	NA	NA	17.9575	NA	NA	NA	NA	15.5311	NA	NA	NA	NA	NA	NA	NA	17.2913	NA	NA	NA	NA	15.727	NA	NA	NA	NA	NA	NA	NA	NA	NA	NA	NA	NA	NA	NA	NA
A2VDJ0	NA	NA	NA	NA	NA	NA	NA	NA	NA	NA	NA	NA	NA	NA	NA	NA	NA	NA	NA	NA	NA	NA	NA	NA	NA	NA	NA	NA	NA	NA	15.5832	16.7784	NA	NA	NA	NA	NA	NA	NA	NA	NA	NA	NA	NA	NA	NA	NA
A6NGN9	NA	NA	NA	NA	NA	NA	NA	NA	NA	NA	NA	NA	NA	NA	NA	NA	NA	NA	NA	NA	NA	NA	NA	NA	NA	NA	NA	NA	NA	NA	NA	NA	NA	NA	NA	NA	NA	NA	NA	NA	NA	NA	NA	19.4158	NA	NA	17.6564
A6NI73	NA	NA	NA	NA	NA	NA	NA	NA	NA	NA	NA	NA	16.478	NA	NA	NA	NA	NA	NA	NA	NA	NA	NA	NA	NA	NA	NA	NA	NA	NA	NA	NA	NA	NA	NA	NA	NA	NA	NA	NA	NA	NA	NA	NA	NA	NA	NA
A6NKL6	NA	NA	NA	NA	NA	NA	15.6007	NA	NA	NA	NA	NA	NA	NA	NA	NA	NA	NA	NA	NA	NA	NA	NA	NA	NA	NA	NA	NA	NA	NA	NA	NA	NA	NA	NA	NA	NA	NA	NA	NA	NA	16.0075	NA	NA	16.8367	NA	NA
A6NMZ7	16.0867	18.276	20.561	NA	NA	NA	NA	NA	NA	NA	NA	NA	NA	NA	NA	NA	NA	NA	NA	NA	NA	NA	NA	NA	NA	NA	NA	NA	NA	NA	NA	NA	NA	NA	19.0248	NA	NA	NA	NA	NA	NA	10.7992	NA	NA	NA	NA	NA
A7MBM2	15.118	NA	NA	NA	NA	NA	NA	NA	NA	NA	NA	NA	NA	NA	NA	NA	NA	NA	17.5121	15.118	NA	NA	NA	NA	NA	NA	NA	NA	NA	NA	NA	NA	NA	NA	NA	NA	NA	NA	NA	NA	NA	NA	NA	NA	NA	NA	NA
A8MVW0	NA	NA	NA	NA	NA	NA	17.531	NA	NA	NA	NA	NA	NA	NA	NA	NA	NA	NA	16.6368	NA	NA	NA	NA	NA	14.7227	NA	NA	NA	NA	NA	NA	NA	NA	NA	NA	NA	NA	NA	NA	NA	NA	NA	NA	17.531	NA	NA	NA
A8MVW5	NA	NA	NA	NA	NA	NA	NA	NA	NA	NA	NA	NA	NA	NA	NA	NA	NA	NA	NA	NA	NA	NA	NA	NA	NA	NA	NA	NA	NA	NA	NA	15.8337	NA	NA	NA	NA	NA	NA	NA	NA	NA	NA	NA	NA	NA	NA	NA
A8MWY0	NA	NA	NA	NA	NA	NA	NA	NA	NA	NA	NA	NA	NA	18.6486	NA	NA	NA	NA	NA	NA	NA	NA	NA	NA	NA	NA	NA	NA	NA	NA	NA	17.5418	NA	NA	NA	NA	NA	NA	NA	NA	NA	NA	NA	NA	NA	NA	NA
A8MYG8	NA	NA	NA	NA	NA	NA	NA	16.4705	NA	NA	NA	NA	NA	NA	NA	NA	NA	NA	NA	NA	NA	NA	NA	NA	NA	NA	NA	NA	NA	NA	NA	NA	NA	NA	NA	NA	NA	NA	NA	NA	NA	NA	NA	NA	NA	NA	NA
A8TX70	NA	NA	NA	NA	NA	NA	NA	NA	NA	17.2611	NA	NA	NA	NA	NA	NA	NA	NA	NA	NA	NA	NA	NA	NA	NA	NA	NA	NA	NA	NA	NA	NA	NA	NA	NA	NA	NA	NA	NA	NA	NA	NA	NA	NA	NA	NA	NA
O00116	NA	NA	NA	NA	NA	NA	NA	NA	NA	NA	NA	NA	NA	NA	NA	NA	NA	NA	15.3848	NA	NA	NA	NA	NA	NA	NA	NA	NA	NA	NA	NA	NA	NA	NA	NA	NA	NA	NA	NA	NA	15.1806	NA	NA	NA	NA	NA	NA
O00206	15.9843	NA	NA	NA	NA	NA	16.9207	NA	NA	NA	NA	NA	16.3565	NA	NA	NA	NA	NA	18.0816	NA	NA	NA	NA	NA	NA	NA	NA	NA	NA	NA	NA	16.454	NA	NA	NA	NA	NA	NA	NA	NA	NA	NA	NA	NA	NA	NA	NA
O00241	NA	NA	NA	NA	NA	19.673	17.6436	NA	NA	NA	NA	NA	NA	NA	NA	NA	NA	NA	NA	NA	NA	19.9509	NA	18.0102	17.3724	NA	20.7464	17.2168	NA	17.0971	NA	NA	NA	NA	NA	NA	NA	NA	NA	NA	NA	NA	NA	NA	17.1428	NA	NA
O00300	NA	NA	NA	NA	NA	NA	NA	NA	NA	NA	NA	NA	NA	NA	NA	NA	NA	NA	NA	NA	NA	NA	NA	NA	NA	NA	NA	NA	NA	NA	NA	NA	NA	NA	NA	NA	NA	NA	NA	NA	17.6034	NA	NA	NA	NA	NA	NA
O00391	NA	NA	NA	NA	NA	NA	NA	NA	NA	NA	NA	NA	NA	NA	NA	NA	NA	NA	NA	NA	NA	NA	NA	NA	NA	NA	NA	NA	NA	NA	NA	NA	NA	NA	NA	NA	NA	NA	NA	NA	NA	16.6	NA	NA	NA	NA	NA
O00398	NA	NA	NA	NA	NA	17.125	NA	NA	NA	NA	NA	NA	NA	NA	NA	NA	NA	NA	NA	NA	NA	17.8909	NA	NA	NA	NA	NA	15.7954	NA	NA	NA	NA	NA	NA	NA	NA	NA	NA	NA	NA	NA	NA	NA	NA	NA	NA	NA
O00451	NA	NA	NA	NA	NA	NA	13.6936	NA	NA	NA	NA	NA	NA	22.872	NA	NA	NA	NA	NA	NA	NA	NA	NA	NA	NA	NA	NA	NA	NA	NA	NA	NA	NA	NA	NA	NA	NA	NA	NA	NA	NA	NA	NA	NA	NA	NA	NA
O00461	NA	NA	NA	NA	NA	NA	16.9383	NA	NA	NA	16.1205	17.4282	NA	14.137	NA	NA	NA	NA	NA	17.0094	NA	NA	NA	NA	13.7641	NA	NA	NA	NA	NA	14.3046	14.0248	NA	15.529	NA	NA	NA	NA	NA	NA	15.6111	19.3951	NA	17.6422	17.2936	NA	NA
O00468	NA	16.5926	NA	NA	14.1894	NA	NA	NA	19.3736	NA	NA	NA	NA	NA	NA	NA	NA	NA	NA	NA	NA	NA	NA	16.6718	16.4456	NA	NA	NA	NA	NA	18.1613	18.0373	NA	19.4411	18.4804	NA	NA	20.1348	NA	NA	NA	19.6639	NA	19.1804	NA	15.4266	16.042
O00469	NA	12.4283	NA	NA	NA	NA	15.3519	NA	18.6111	NA	15.8414	17.2112	NA	15.8691	NA	NA	NA	NA	13.0412	NA	NA	NA	NA	13.7318	15.581	NA	NA	NA	NA	13.7232	19.3191	18.8972	NA	20.1823	16.955	21.1591	NA	NA	NA	NA	15.8204	17.6118	NA	20.1388	NA	NA	16.1042
O00533	NA	NA	NA	NA	NA	NA	17.2944	NA	NA	NA	NA	NA	NA	NA	NA	NA	NA	NA	NA	NA	NA	NA	NA	19.4102	19.104	NA	NA	NA	NA	NA	NA	NA	NA	NA	NA	NA	NA	NA	14.9642	NA	NA	NA	NA	NA	NA	NA	NA
O00567	NA	NA	NA	NA	NA	NA	NA	NA	NA	NA	NA	NA	NA	NA	NA	NA	NA	16.1336	NA	NA	NA	NA	NA	NA	15.9545	NA	NA	NA	NA	NA	NA	NA	NA	15.1894	NA	NA	NA	NA	NA	NA	NA	16.5631	NA	NA	NA	NA	NA
O00587	NA	NA	NA	NA	NA	NA	NA	NA	NA	NA	NA	NA	NA	NA	NA	NA	NA	NA	NA	NA	NA	NA	NA	NA	NA	NA	NA	NA	NA	NA	NA	NA	NA	NA	NA	NA	NA	NA	17.9357	NA	NA	NA	NA	NA	NA	NA	NA
O00592	NA	16.1697	NA	NA	NA	NA	NA	NA	16.4726	NA	18.1182	16.9574	NA	18.6083	NA	NA	NA	NA	NA	NA	NA	NA	NA	NA	NA	NA	NA	NA	17.2323	NA	NA	18.1527	NA	17.1529	NA	NA	NA	18.456	NA	NA	NA	18.4803	17.0034	19.0045	18.4821	NA	NA
O00754	NA	NA	NA	NA	NA	NA	NA	18.483	NA	NA	16.6151	NA	NA	NA	NA	NA	NA	NA	NA	NA	NA	NA	NA	17.9343	18.7275	NA	NA	NA	NA	NA	18.5468	18.2728	NA	17.5974	NA	NA	NA	NA	NA	NA	NA	18.3035	NA	18.6638	NA	NA	NA
O14494	14.8015	14.8022	NA	NA	NA	NA	NA	NA	NA	NA	15.8632	15.9096	<	NA	16.7785	NA	NA	NA	NA	NA	NA	NA	NA	16.8529	NA	NA	NA	NA	NA	NA	16.1425	16.6192	NA	19.616	NA	NA	NA	NA	NA	NA	NA	17.0965	NA	NA	NA	NA	NA
O14495	NA	NA	NA	NA	NA	NA	NA	NA	NA	NA	NA	NA	NA	NA	NA	NA	NA	NA	NA	NA	NA	NA	NA	NA	NA	NA	NA	NA	NA	NA	NA	NA	NA	20.0063	NA	NA	NA	NA	NA	NA	NA	NA	NA	NA	NA	NA	NA
O14498	NA	NA	NA	NA	NA	NA	NA	NA	NA	NA	NA	NA	NA	NA	NA	NA	NA	NA	NA	NA	NA	NA	NA	NA	NA	NA	NA	NA	NA	18.1044	NA	17.8831	NA	NA	NA	NA	NA	NA	NA	NA	NA	NA	NA	NA	NA	NA	NA
O14524	NA	NA	NA	NA	NA	NA	NA	NA	NA	NA	NA	NA	NA	19.8433	NA	NA	NA	NA	NA	NA	NA	NA	NA	18.562	17.2896	NA	NA	NA	NA	NA	20.864	20.3892	NA	20.0696	NA	NA	NA	NA	NA	NA	NA	18.3369	NA	NA	NA	NA	NA
O14556	NA	17.2009	NA	NA	NA	NA	NA	NA	NA	NA	24.1272	NA	NA	NA	NA	NA	NA	NA	NA	NA	19.0261	NA	NA	NA	NA	NA	NA	NA	NA	NA	NA	NA	NA	NA	NA	NA	NA	NA	NA	NA	NA	NA	NA	NA	NA	NA	NA
O14638	NA	NA	NA	NA	NA	NA	NA	NA	NA	NA	NA	NA	NA	NA	NA	18.6098	18.7148	NA	NA	NA	NA	NA	NA	NA	NA	NA	NA	NA	NA	NA	NA	NA	NA	NA	NA	NA	NA	NA	NA	NA	NA	NA	NA	NA	NA	NA	NA
O14657	NA	NA	NA	NA	NA	NA	NA	NA	NA	NA	18.2728	NA	NA	NA	NA	NA	NA	NA	NA	NA	NA	NA	NA	NA	NA	NA	NA	NA	NA	NA	19.0726	19.1004	NA	18.5622	NA	NA	NA	NA	NA	NA	NA	20.9588	NA	18.227	NA	NA	NA
O14672	18.1787	15.5153	18.3937	NA	18.133	17.0393	19.1224	15.7797	16.6444	16.5072	17.0441	16.7846	15.9565	17.7155	19.2496	15.8087	19.0667	19.8542	16.1238	16.4288	16.1067	16.6999	16.138	16.0562	17.8853	NA	17.6126	16.9538	18.5641	22.3386	17.2489	17.7201	NA	16.1517	18.0158	NA	18.9591	18.4427	17.0392	18.1664	14.4413	16.8099	17.5327	17.3219	16.8834	15.4558	16.8851
O14773	NA	NA	NA	NA	NA	NA	NA	NA	NA	NA	NA	NA	NA	NA	NA	NA	NA	NA	NA	NA	NA	NA	17.5724	NA	NA	NA	NA	NA	NA	NA	18.3057	18.2031	NA	19.4819	NA	NA	NA	NA	NA	NA	18.1042	NA	NA	17.604	NA	NA	NA
O14786	17.7571	18.1611	18.1776	NA	NA	NA	19.8231	NA	18.7476	NA	18.8434	16.3564	16.1247	NA	NA	NA	NA	NA	18.2148	16.1711	16.6366	NA	NA	NA	NA	15.6286	15.3577	NA	17.1835	18.2233	15.3228	16.4634	NA	18.6158	20.432	NA	18.1875	18.8903	NA	NA	18.4825	19.1641	NA	19.0544	19.1964	19.1944	18.93
O14817	NA	17.7589	NA	NA	NA	NA	NA	NA	NA	NA	NA	NA	NA	NA	16.2512	NA	NA	NA	NA	NA	NA	NA	NA	NA	NA	NA	NA	NA	NA	NA	NA	NA	NA	NA	NA	NA	NA	NA	NA	NA	17.7589	NA	NA	NA	NA	NA	NA
O14836	NA	NA	NA	NA	NA	NA	NA	NA	NA	NA	NA	NA	NA	NA	NA	NA	NA	NA	NA	NA	NA	NA	NA	NA	NA	NA	NA	NA	NA	NA	NA	NA	NA	NA	NA	NA	NA	NA	NA	16.7241	NA	NA	NA	NA	NA	NA	NA
O14917	NA	NA	NA	NA	NA	NA	NA	NA	NA	NA	NA	19.2145	NA	NA	NA	NA	NA	NA	NA	NA	NA	NA	NA	NA	NA	NA	NA	NA	NA	NA	NA	NA	NA	NA	NA	NA	NA	NA	NA	NA	NA	17.5261	NA	NA	NA	NA	NA
O14931	NA	NA	NA	NA	NA	NA	NA	NA	NA	NA	NA	NA	NA	NA	NA	NA	NA	NA	NA	NA	NA	NA	NA	NA	NA	NA	NA	19.0366	NA	NA	NA	NA	NA	NA	NA	NA	NA	NA	NA	NA	NA	NA	NA	NA	NA	NA	NA
O15031	18.2239	18.6729	17.9779	NA	17.9687	NA	17.3372	17.0951	18.6414	15.5374	18.6749	17.4061	17.7979	18.6031	18.9053	15.477	16.8185	17.9929	17.548	17.606	14.9213	16.639	17.4686	14.5449	14.6725	NA	19.0039	18.7167	15.1048	15.869	14.2009	15.8492	18.5723	13.7072	18.5737	18.9161	19.6141	19.0434	NA	15.7574	15.5485	17.3229	15.9467	19.0031	18.1699	17.7702	18.0949
O15118	19.4	13.3675	NA	NA	NA	16.9881	19.2155	NA	NA	21.4358	16.4891	19.5938	NA	16.852	14.0875	NA	NA	NA	22.9287	NA	NA	NA	15.8868	17.7234	18.9923	NA	NA	18.8911	NA	NA	17.7453	15.7643	NA	19.0767	NA	NA	NA	NA	NA	NA	NA	18.3632	NA	15.9861	NA	NA	NA
O15230	16.9887	18.1526	NA	NA	16.9179	NA	18.6203	NA	18.1777	NA	18.0199	18.511	NA	NA	NA	NA	NA	NA	16.9541	NA	NA	NA	17.2867	NA	18.5873	NA	NA	NA	16.9075	NA	19.8931	20.215	NA	NA	NA	16.7402	15.9778	18.1954	NA	NA	NA	17.9294	NA	17.4073	17.8981	NA	17.5079
O15321	NA	NA	NA	NA	NA	NA	NA	18.7795	NA	16.2588	21.9386	19.059	NA	NA	NA	NA	18.3903	NA	16.5178	17.0227	NA	16.38	18.3907	NA	20.9407	NA	NA	NA	NA	NA	21.4586	20.7934	NA	20.6598	NA	NA	NA	NA	NA	NA	15.5432	17.2516	NA	18.0158	15.8217	NA	NA
O15389	18.7865	17.9839	NA	NA	NA	19.0642	NA	NA	NA	NA	NA	NA	15.8223	NA	NA	NA	NA	NA	NA	NA	NA	16.6698	18.5836	NA	NA	NA	18.8692	18.3911	NA	NA	NA	NA	NA	NA	NA	NA	NA	NA	NA	NA	NA	NA	NA	NA	NA	17.3663	NA
O15394	16.7994	NA	NA	NA	NA	NA	19.6089	NA	NA	NA	NA	NA	NA	NA	NA	NA	NA	18.8402	18.0638	NA	19.2228	NA	NA	NA	19.8778	NA	NA	NA	17.9899	17.4626	NA	NA	NA	NA	17.0564	NA	20.2736	NA	NA	NA	NA	NA	NA	NA	NA	NA	19.4341
O15439	NA	NA	NA	NA	NA	NA	16.983	NA	NA	NA	14.3386	16.9021	NA	NA	NA	NA	NA	NA	NA	NA	NA	NA	NA	NA	NA	NA	NA	NA	NA	16.8009	NA	NA	NA	NA	NA	NA	NA	NA	NA	NA	NA	NA	NA	NA	NA	NA	NA
O15440	NA	NA	NA	NA	NA	NA	19.0649	15.9961	NA	16.2792	18.3112	NA	19.9727	NA	NA	NA	15.281	16.0843	18.2512	NA	NA	NA	16.2539	NA	NA	NA	15.8494	NA	NA	NA	NA	NA	19.0604	NA	NA	NA	NA	18.0736	16.7985	16.1542	16.4175	17.4766	17.3157	17.5669	14.6843	NA	NA
O15455	NA	NA	NA	NA	NA	NA	NA	NA	NA	NA	NA	NA	NA	NA	NA	NA	NA	NA	17.9259	NA	NA	NA	NA	15.8085	16.5792	NA	NA	17.9259	NA	NA	NA	NA	NA	NA	NA	NA	NA	NA	NA	NA	NA	NA	NA	NA	NA	NA	NA
O15460	NA	NA	NA	NA	NA	NA	NA	NA	NA	NA	NA	NA	NA	NA	NA	NA	NA	NA	14.6244	NA	NA	NA	NA	NA	14.2475	NA	NA	NA	NA	15.3134	20.1644	21.9466	NA	21.2852	NA	21.5338	NA	NA	NA	NA	14.9236	15.3586	NA	21.2971	NA	NA	NA
O43155	NA	NA	NA	NA	NA	NA	17.5642	NA	NA	NA	NA	NA	NA	NA	NA	NA	NA	NA	15.3387	NA	NA	NA	NA	NA	NA	NA	NA	NA	NA	15.0232	16.9413	15.6948	NA	17.1625	NA	NA	NA	NA	NA	NA	NA	17.9596	NA	NA	NA	NA	NA
O43157	17.6478	17.5632	19.4264	NA	19.7157	NA	17.9688	NA	16.5499	18.0703	17.5997	18.8578	NA	16.1595	18.1464	NA	NA	NA	18.8591	18.8797	NA	NA	NA	17.59	16.9528	NA	NA	NA	17.3819	18.2454	NA	NA	NA	NA	NA	NA	18.4074	19.8334	NA	NA	17.2769	18.5589	NA	14.9179	18.1727	NA	18.0867
O43184	NA	NA	NA	NA	NA	NA	NA	NA	NA	NA	NA	NA	NA	NA	NA	NA	NA	NA	NA	NA	NA	NA	NA	NA	NA	NA	NA	NA	NA	NA	21.1479	NA	NA	NA	NA	NA	NA	NA	NA	NA	NA	21.0761	NA	NA	NA	NA	NA
O43194	18.3238	NA	NA	NA	18.2719	NA	17.838	NA	18.6115	NA	NA	16.2185	NA	NA	NA	NA	NA	NA	14.4005	NA	NA	NA	NA	NA	NA	NA	NA	NA	NA	NA	NA	NA	NA	NA	17.2465	NA	19.4574	16.9204	NA	NA	NA	16.1835	NA	15.9336	NA	NA	NA
O43286	NA	NA	NA	NA	NA	NA	NA	NA	NA	NA	NA	NA	NA	NA	NA	NA	NA	NA	NA	NA	NA	NA	NA	NA	NA	NA	NA	NA	NA	NA	19.5736	18.0398	NA	NA	NA	NA	NA	NA	NA	NA	NA	NA	NA	NA	NA	NA	NA
O43306	NA	17.1943	NA	NA	NA	17.4489	NA	NA	NA	NA	NA	NA	NA	NA	NA	NA	NA	NA	NA	NA	NA	NA	NA	NA	NA	NA	NA	NA	NA	NA	NA	NA	NA	NA	NA	NA	NA	NA	NA	NA	NA	NA	NA	NA	NA	NA	NA
O43462	NA	NA	NA	NA	NA	NA	NA	NA	NA	NA	18.6198	18.416	NA	17.7648	NA	NA	NA	NA	NA	NA	NA	NA	NA	NA	18.123	NA	NA	NA	NA	NA	17.7354	NA	NA	17.7203	NA	NA	NA	NA	NA	NA	NA	19.1295	NA	NA	NA	NA	NA
O43490	NA	NA	17.1762	NA	18.9453	16.0235	NA	NA	NA	NA	17.1058	NA	NA	NA	NA	NA	NA	NA	NA	NA	NA	NA	NA	NA	NA	NA	NA	NA	NA	NA	16.2428	18.7647	NA	NA	NA	NA	NA	NA	NA	NA	NA	13.9891	NA	NA	NA	NA	NA
O43505	NA	NA	NA	NA	NA	NA	NA	NA	NA	NA	NA	NA	NA	NA	NA	NA	NA	NA	17.3604	15.9642	NA	NA	NA	NA	19.3014	NA	NA	NA	NA	NA	19.065	NA	NA	19.7827	NA	NA	NA	NA	NA	NA	16.9318	18.9894	NA	NA	18.3906	NA	NA
O43556	NA	18.7697	NA	NA	NA	NA	18.2614	NA	NA	NA	NA	18.1589	NA	NA	NA	17.1235	17.6468	NA	19.6201	NA	NA	NA	NA	19.6904	19.7114	NA	NA	NA	NA	NA	20.2973	20.5611	NA	20.9766	NA	NA	NA	NA	NA	17.5719	18.4442	19.3562	16.5256	16.0235	NA	NA	NA
O43567	NA	NA	NA	NA	NA	NA	NA	NA	NA	NA	18.3458	18.8694	NA	NA	NA	NA	NA	NA	15.0227	NA	NA	NA	NA	17.8351	18.8797	NA	NA	NA	NA	NA	18.5432	18.2689	NA	19.2785	NA	NA	NA	NA	NA	NA	NA	16.9357	NA	NA	14.8654	NA	NA
O43570	NA	NA	NA	NA	NA	NA	16.7738	NA	NA	NA	NA	NA	NA	NA	NA	NA	NA	NA	17.7703	16.6469	NA	NA	NA	NA	NA	NA	NA	NA	17.3944	19.3794	NA	NA	NA	NA	NA	NA	NA	NA	NA	NA	18.2391	NA	NA	NA	NA	18.8024	NA
O43657	20.4886	15.0616	NA	NA	15.7194	NA	16.2595	NA	16.668	NA	18.3716	NA	NA	NA	NA	NA	NA	NA	17.7109	17.3377	NA	NA	NA	NA	16.9798	NA	NA	NA	NA	18.0068	15.2889	18.5696	NA	NA	14.8818	NA	NA	15.7131	NA	NA	13.8542	15.901	NA	18.5676	16.6994	NA	15.2573
O43688	21.4477	NA	NA	NA	21.7724	NA	20.6301	NA	22.059	NA	NA	22.5966	NA	NA	NA	NA	NA	NA	19.8515	NA	17.363	NA	NA	NA	18.3401	NA	NA	NA	19.5012	NA	21.6695	NA	NA	21.5672	NA	NA	21.7949	20.5233	NA	NA	NA	22.377	NA	17.8522	NA	NA	22.3971
O43699	NA	NA	NA	NA	NA	NA	NA	NA	NA	NA	NA	NA	NA	NA	NA	17.309	17.7239	NA	NA	NA	NA	16.6435	17.122	NA	NA	NA	NA	NA	NA	NA	NA	NA	NA	NA	NA	NA	NA	NA	NA	NA	NA	NA	NA	NA	NA	NA	NA
O43707	17.7032	NA	NA	NA	NA	NA	NA	NA	NA	NA	NA	NA	NA	NA	NA	NA	NA	NA	NA	NA	NA	NA	NA	NA	NA	NA	NA	NA	NA	NA	17.2514	NA	NA	NA	NA	NA	NA	NA	NA	NA	NA	NA	NA	NA	NA	NA	NA
O43852	20.6205	NA	NA	NA	NA	NA	NA	NA	17.6786	NA	18.2761	16.0687	NA	19.0308	NA	NA	NA	NA	18.3121	18.3672	NA	NA	NA	20.242	21.2677	NA	18.8131	NA	NA	21.3158	23.0067	23.074	NA	23.1059	NA	NA	NA	NA	NA	NA	18.314	20.3482	NA	NA	19.8391	NA	NA
O43909	17.1633	NA	NA	NA	NA	NA	15.4147	NA	15.3001	NA	17.4393	NA	NA	NA	NA	NA	NA	NA	NA	NA	NA	NA	NA	NA	NA	NA	NA	NA	NA	NA	19.8184	20.5092	NA	18.4457	NA	NA	NA	NA	NA	NA	NA	18.8685	NA	NA	NA	NA	NA
O60243	NA	NA	NA	NA	NA	NA	NA	NA	NA	NA	NA	NA	NA	17.8983	NA	NA	NA	NA	NA	NA	NA	NA	NA	NA	NA	NA	NA	NA	NA	NA	NA	NA	NA	NA	NA	NA	NA	NA	NA	NA	NA	NA	NA	NA	NA	NA	NA
O60245	NA	NA	NA	NA	NA	NA	14.7695	NA	NA	NA	19.0169	17.8596	NA	NA	NA	NA	NA	NA	16.7844	15.6314	NA	NA	NA	14.9891	15.6125	NA	NA	NA	16.1762	15.8961	16.514	18.0275	15.2488	NA	15.4697	NA	15.8746	15.1267	NA	NA	16.8355	14.5593	NA	15.8024	NA	NA	19.3909
O60266	16.7662	NA	18.4485	NA	NA	NA	17.8967	NA	NA	18.4529	20.3207	NA	NA	19.4871	18.1442	NA	18.8563	19.1805	19.1473	NA	NA	NA	NA	18.8768	NA	NA	NA	NA	NA	NA	18.197	NA	NA	NA	NA	NA	NA	NA	NA	18.641	NA	18.828	16.7095	NA	NA	NA	NA
O60279	NA	NA	NA	NA	NA	NA	NA	NA	NA	NA	18.6898	NA	NA	NA	NA	NA	NA	NA	NA	18.0914	18.96	NA	NA	NA	NA	NA	NA	NA	18.1114	NA	NA	NA	NA	NA	NA	NA	NA	NA	NA	NA	19.0903	18.1957	NA	18.6094	NA	NA	NA
O60330	NA	NA	NA	NA	NA	NA	NA	NA	NA	NA	NA	NA	NA	NA	NA	NA	NA	NA	NA	NA	NA	NA	NA	NA	17.9919	NA	NA	NA	NA	20.0442	NA	NA	NA	NA	NA	NA	NA	NA	NA	NA	NA	NA	NA	NA	NA	NA	NA
O60449	17.3018	13.1154	18.0347	NA	16.9566	17.8042	16.2347	16.5674	NA	17.7622	NA	NA	15.6605	NA	NA	19.1667	19.2962	18.5738	14.4818	NA	NA	17.4695	20.0052	16.2475	16.7861	13.7855	17.6332	17.2629	13.2489	NA	NA	NA	NA	NA	NA	NA	NA	18.8825	18.5042	17.4871	NA	20.8094	18.1438	NA	NA	NA	15.4442
O60462	18.8197	NA	16.6203	NA	NA	NA	17.5471	NA	NA	NA	NA	NA	NA	NA	NA	19.232	18.9283	NA	NA	19.1618	16.9867	NA	NA	19.4728	19.8386	NA	NA	NA	17.6156	20.8892	17.7704	19.0051	NA	NA	21.8402	NA	NA	NA	NA	16.1161	NA	21.7515	NA	NA	19.5928	19.694	NA
O60486	19.9879	NA	18.0415	NA	NA	15.2611	17.1247	NA	NA	16.4357	NA	NA	19.9879	15.6022	NA	16.2304	18.336	NA	NA	NA	NA	15.4452	17.2759	18.8931	18.9989	NA	NA	15.5112	NA	NA	NA	NA	NA	NA	NA	NA	NA	NA	17.2084	16.5379	NA	NA	NA	NA	NA	24.4574	NA
O60487	17.6803	15.2789	NA	NA	17.3011	17.8819	NA	14.3694	NA	NA	17.5221	19.4062	NA	NA	NA	NA	NA	NA	16.4942	18.957	NA	NA	NA	NA	NA	NA	NA	NA	NA	NA	NA	NA	NA	NA	NA	NA	NA	NA	NA	NA	NA	NA	16.173	NA	NA	NA	15.6671
O60503	17.6386	NA	15.6679	NA	NA	13.5615	18.7693	16.3265	18.7772	16.034	20.1385	14.512	16.0603	13.6749	NA	NA	14.7513	14.318	17.6782	17.8543	13.3406	NA	NA	13.5243	14.4287	17.1516	15.8868	16.8734	14.6525	16.0855	16.4358	NA	18.4185	NA	19.5726	NA	16.616	19.5805	NA	NA	18.0826	16.9778	15.4534	15.8679	16.5622	16.0636	20.0709
O60512	16.4902	NA	NA	NA	NA	NA	NA	NA	NA	NA	19.2364	NA	NA	19.9557	NA	NA	NA	NA	19.4511	21.5078	NA	NA	NA	NA	18.217	NA	NA	NA	NA	NA	16.4179	19.5807	NA	NA	NA	NA	23.7348	NA	NA	NA	18.5649	17.9158	NA	NA	15.2214	NA	NA
O60565	NA	NA	NA	NA	NA	NA	17.9541	NA	NA	NA	NA	NA	NA	NA	NA	NA	NA	NA	NA	NA	NA	NA	NA	NA	NA	NA	NA	NA	NA	NA	NA	NA	NA	NA	19.1528	NA	NA	NA	NA	NA	NA	NA	NA	NA	NA	NA	NA
O60568	18.5093	14.5741	NA	NA	18.4735	NA	15.8627	NA	16.8847	NA	17.2551	17.416	NA	15.7694	NA	NA	NA	NA	17.3731	18.1146	15.0068	NA	NA	15.2153	16.0963	NA	NA	NA	NA	NA	20.203	19.3155	NA	19.0805	20.0559	19.548	14.8011	15.8095	NA	NA	19.0208	16.72	NA	20.0126	16.5404	NA	16.6671
O60603	NA	NA	16.2923	NA	NA	NA	NA	NA	NA	NA	NA	NA	15.6793	NA	NA	NA	16.7021	NA	NA	NA	NA	NA	NA	NA	18.1613	NA	18.406	NA	NA	NA	NA	NA	NA	NA	NA	NA	21.0675	16.4802	NA	NA	NA	NA	NA	NA	NA	NA	NA
O60635	17.5228	NA	NA	NA	NA	NA	NA	NA	NA	NA	NA	NA	NA	NA	NA	NA	NA	NA	NA	NA	NA	NA	NA	NA	NA	NA	NA	NA	NA	NA	NA	NA	NA	NA	NA	NA	NA	NA	NA	NA	NA	NA	NA	NA	NA	NA	NA
O60636	NA	NA	NA	NA	NA	NA	NA	NA	NA	NA	NA	NA	NA	NA	16.5577	NA	NA	NA	NA	NA	NA	NA	NA	NA	NA	NA	NA	NA	NA	NA	NA	NA	NA	NA	NA	NA	NA	NA	NA	NA	NA	NA	NA	NA	NA	NA	NA
O60637	15.2852	13.9545	12.7223	NA	14.5395	NA	15.0135	12.4448	15.3509	12.9976	16.3618	13.6517	12.5525	20.6513	16.8381	13.1149	13.2927	13.5269	16.2663	16.5278	NA	NA	16.058	18.0424	17.9265	NA	14.5739	NA	11.317	13.3913	17.2854	18.5449	17.1253	16.5487	14.9932	16.911	NA	15.6603	12.7833	12.1363	17.6655	16.3589	13.9187	18.3281	16.8516	NA	17.7126
O60779	17.1883	NA	16.4147	NA	16.1803	NA	18.0372	17.1707	NA	17.312	18.8684	17.6798	17.7849	23.0385	19.3655	18.0653	17.1151	20.5962	18.8059	NA	NA	NA	23.4496	17.2758	17.8331	NA	19.3381	NA	NA	NA	14.5784	16.1259	NA	NA	19.3257	NA	NA	18.9569	NA	18.2637	NA	17.2304	21.0999	15.3612	NA	NA	19.7406
O60896	NA	17.8735	NA	NA	NA	NA	NA	NA	NA	NA	NA	NA	NA	NA	NA	NA	NA	NA	NA	NA	NA	NA	NA	NA	NA	NA	NA	NA	NA	NA	NA	NA	NA	NA	NA	NA	NA	NA	NA	NA	NA	NA	NA	NA	NA	NA	NA
O60911	NA	NA	NA	NA	NA	NA	NA	NA	NA	NA	NA	NA	NA	NA	NA	NA	NA	NA	NA	NA	NA	NA	NA	NA	NA	NA	NA	NA	NA	NA	NA	17.7049	NA	NA	NA	NA	NA	NA	NA	NA	NA	NA	NA	NA	NA	NA	NA
O60931	NA	NA	NA	NA	NA	NA	NA	NA	NA	14.567	NA	NA	NA	NA	NA	15.734	16.8198	18.066	NA	NA	NA	NA	17.6519	NA	NA	NA	NA	NA	NA	NA	NA	NA	NA	NA	NA	NA	NA	NA	NA	16.308	NA	NA	16.2061	NA	NA	NA	NA
O60939	NA	NA	NA	NA	NA	NA	NA	NA	NA	NA	NA	NA	NA	NA	NA	NA	NA	NA	NA	NA	NA	NA	NA	NA	NA	NA	NA	NA	NA	NA	NA	NA	NA	NA	NA	NA	NA	NA	NA	NA	NA	NA	NA	18.5103	NA	NA	NA
O75015	NA	NA	19.0919	NA	NA	NA	NA	NA	NA	NA	NA	NA	NA	NA	NA	NA	NA	NA	NA	NA	NA	NA	NA	NA	NA	NA	NA	17.9231	NA	NA	NA	NA	NA	NA	NA	NA	NA	NA	NA	NA	NA	NA	NA	NA	NA	NA	NA
O75019	NA	NA	17.8738	NA	NA	NA	NA	NA	NA	NA	NA	NA	17.8738	NA	NA	NA	NA	17.3986	NA	NA	NA	NA	NA	NA	NA	NA	NA	18.1085	NA	NA	NA	NA	NA	NA	NA	NA	NA	NA	NA	16.9515	NA	NA	NA	NA	NA	NA	NA
O75051	NA	NA	NA	NA	NA	NA	NA	NA	NA	NA	17.4343	NA	NA	NA	NA	NA	NA	NA	NA	NA	NA	NA	NA	NA	NA	NA	NA	NA	NA	NA	16.1756	16.8087	NA	NA	NA	NA	NA	NA	NA	NA	NA	17.4343	NA	NA	NA	NA	NA
O75054	17.3265	NA	17.1121	NA	NA	NA	13.6877	NA	NA	16.594	15.8066	15.7544	NA	17.3527	16.3779	15.3093	17.2957	NA	14.0407	14.3958	15.6675	NA	16.7007	19.4897	19.5481	NA	NA	NA	16.4992	NA	13.2006	NA	NA	NA	NA	NA	13.5293	NA	NA	NA	16.7521	17.6242	NA	15.0734	15.9084	NA	14.8345
O75071	NA	NA	NA	NA	NA	NA	NA	NA	NA	NA	19.037	NA	NA	19.7636	NA	NA	NA	NA	19.3357	NA	NA	NA	NA	NA	19.5382	NA	NA	NA	NA	NA	NA	NA	NA	NA	NA	NA	NA	NA	NA	12.9969	18.6047	NA	NA	NA	18.9253	NA	NA
O75072	NA	NA	NA	NA	NA	NA	NA	NA	NA	NA	NA	NA	NA	NA	NA	NA	NA	NA	NA	NA	NA	NA	NA	NA	NA	NA	NA	NA	NA	NA	NA	NA	NA	NA	NA	NA	NA	NA	NA	NA	NA	17.7606	NA	NA	NA	NA	NA
O75094	16.7941	NA	NA	NA	NA	NA	NA	22.4334	NA	20.4286	NA	NA	NA	NA	NA	21.1921	21.814	20.8107	19.1814	NA	NA	NA	NA	NA	NA	NA	NA	NA	NA	NA	NA	NA	NA	NA	NA	NA	NA	16.7941	NA	22.2325	NA	NA	NA	NA	NA	NA	NA
O75096	NA	NA	NA	NA	NA	NA	NA	NA	NA	NA	NA	NA	NA	NA	NA	NA	NA	NA	16.7987	16.1757	NA	NA	NA	NA	NA	NA	NA	NA	NA	NA	NA	NA	NA	NA	NA	NA	NA	NA	NA	NA	16.0761	NA	NA	NA	16.2595	NA	NA
O75121	NA	NA	NA	NA	NA	NA	NA	NA	NA	NA	21.4509	NA	NA	NA	NA	NA	NA	NA	NA	NA	NA	NA	NA	17.239	NA	NA	NA	NA	NA	NA	NA	NA	NA	NA	NA	NA	NA	NA	NA	NA	NA	NA	NA	NA	NA	NA	NA
O75144	16.258	NA	16.7153	NA	NA	16.489	18.8204	19.6828	NA	NA	16.9295	16.2594	16.7186	NA	NA	NA	20.1531	NA	18.2825	18.1998	16.7358	NA	NA	NA	NA	NA	19.9485	NA	17.5491	NA	NA	NA	NA	NA	NA	NA	17.2349	NA	19.5113	19.4266	19.5278	NA	NA	18.4867	16.5943	NA	21.458
O75197	NA	NA	NA	NA	NA	NA	NA	NA	NA	NA	16.9883	NA	NA	NA	NA	NA	NA	NA	NA	NA	NA	NA	NA	NA	NA	NA	NA	NA	NA	NA	16.2129	NA	NA	NA	NA	NA	NA	NA	NA	NA	NA	19.6907	NA	NA	NA	NA	NA
O75326	15.0068	NA	NA	NA	16.2414	NA	15.5576	15.6002	17.634	NA	NA	NA	NA	NA	15.1435	18.1222	NA	NA	15.8067	NA	NA	16.3686	16.0506	NA	NA	14.174	15.9783	NA	NA	NA	17.2872	18.0072	NA	NA	18.3784	NA	15.7825	NA	NA	14.011	NA	17.8237	13.9901	15.9989	NA	15.8135	NA
O75387	NA	NA	NA	NA	NA	16.5375	NA	NA	NA	NA	NA	NA	17.754	NA	15.8078	NA	NA	NA	NA	NA	NA	NA	NA	NA	NA	NA	17.2265	NA	NA	NA	NA	NA	NA	NA	NA	NA	NA	NA	NA	16.1181	NA	NA	16.1457	NA	NA	NA	NA
O75396	16.0221	NA	NA	NA	NA	NA	NA	NA	NA	NA	NA	NA	NA	NA	NA	NA	NA	NA	NA	NA	NA	NA	NA	NA	NA	NA	NA	NA	NA	NA	NA	NA	NA	NA	NA	NA	NA	NA	NA	NA	NA	NA	NA	NA	16.8749	NA	NA
O75462	NA	NA	NA	NA	NA	NA	NA	NA	NA	NA	NA	NA	NA	NA	NA	NA	NA	NA	NA	NA	NA	NA	NA	NA	NA	NA	NA	NA	NA	NA	NA	NA	NA	NA	NA	NA	16.7397	NA	NA	NA	NA	NA	NA	18.8488	NA	NA	NA
O75477	NA	NA	NA	NA	NA	NA	NA	NA	NA	NA	17.4229	NA	NA	NA	NA	NA	NA	NA	NA	NA	NA	NA	NA	NA	NA	NA	NA	NA	NA	NA	14.7029	14.8734	NA	NA	NA	NA	NA	NA	NA	NA	NA	19.5	NA	NA	NA	NA	NA
O75487	NA	16.7124	NA	NA	NA	NA	NA	NA	NA	NA	NA	NA	NA	NA	NA	NA	NA	NA	NA	NA	NA	NA	NA	NA	NA	NA	NA	NA	NA	NA	NA	NA	NA	NA	NA	NA	NA	NA	NA	NA	NA	16.7124	NA	NA	NA	NA	NA
O75503	NA	NA	NA	NA	NA	NA	NA	NA	NA	NA	NA	NA	NA	NA	NA	NA	NA	NA	NA	NA	NA	NA	NA	NA	NA	NA	NA	NA	NA	NA	NA	NA	NA	NA	NA	NA	NA	NA	NA	NA	NA	18.2333	NA	15.6536	NA	NA	NA
O75509	17.2769	NA	NA	NA	NA	NA	NA	NA	NA	NA	NA	NA	NA	NA	NA	NA	NA	NA	15.7604	15.761	NA	NA	NA	NA	NA	NA	NA	NA	NA	NA	NA	NA	NA	NA	NA	NA	NA	NA	NA	NA	NA	NA	NA	NA	NA	NA	NA
O75578	NA	NA	NA	NA	NA	NA	17.6621	NA	NA	NA	NA	NA	NA	NA	NA	NA	NA	NA	NA	NA	NA	NA	NA	NA	NA	NA	NA	NA	NA	16.7075	NA	NA	NA	NA	18.8692	NA	NA	NA	NA	NA	NA	NA	NA	NA	NA	NA	NA
O75629	NA	16.2725	NA	NA	NA	NA	NA	NA	NA	NA	NA	NA	NA	NA	NA	NA	NA	NA	NA	NA	NA	NA	NA	NA	NA	NA	NA	NA	NA	NA	16.3845	17.249	NA	NA	NA	NA	NA	NA	NA	NA	NA	18.4313	NA	16.2372	NA	NA	NA
O75718	NA	NA	NA	NA	NA	NA	NA	NA	NA	NA	NA	15.7111	NA	NA	NA	NA	NA	NA	NA	NA	NA	NA	NA	NA	17.0297	NA	NA	NA	NA	NA	20.4405	19.9094	NA	18.2428	NA	16.7181	NA	NA	NA	NA	17.1908	18.0043	NA	15.7111	NA	NA	NA
O75882	17.7818	NA	NA	NA	15.5291	21.423	15.5485	14.2022	19.2688	NA	17.9984	19.6669	NA	15.7213	16.587	NA	NA	NA	14.7673	15.8666	NA	NA	NA	NA	16.9547	NA	NA	NA	14.1016	17.5255	19.18	16.6046	14.7563	18.2806	21.6875	21.0923	18.3658	18.5859	14.0864	NA	14.6001	19.0125	NA	18.1245	16.8945	17.0316	17.7821
O75976	14.8406	NA	NA	NA	NA	NA	17.3871	NA	17.4351	NA	18.3434	17.1204	NA	19.6334	NA	NA	NA	NA	16.7905	17.3615	NA	NA	NA	16.7725	17.4448	NA	16.2281	NA	NA	NA	17.3628	18.662	NA	15.6282	NA	NA	NA	NA	NA	NA	17.74	18.648	NA	16.6979	18.8456	NA	NA
O76021	NA	NA	NA	NA	NA	NA	NA	NA	NA	NA	NA	NA	NA	18.6349	NA	NA	NA	NA	NA	NA	NA	NA	NA	NA	NA	NA	NA	NA	NA	NA	NA	NA	NA	NA	NA	NA	NA	NA	NA	NA	NA	NA	NA	NA	NA	NA	NA
O76082	18.0348	NA	15.0908	NA	NA	NA	17.6818	NA	NA	17.503	18.4069	NA	NA	NA	NA	16.6559	16.9664	17.665	18.4106	18.3853	NA	NA	15.6725	NA	NA	NA	17.7846	NA	17.9715	NA	NA	NA	NA	NA	NA	NA	NA	NA	NA	NA	17.0229	16.3607	15.7501	NA	NA	NA	NA
O94813	NA	NA	NA	NA	NA	NA	19.6675	NA	NA	NA	17.5897	NA	NA	NA	NA	NA	NA	NA	16.8793	NA	NA	NA	NA	NA	NA	NA	NA	NA	NA	NA	NA	NA	NA	NA	NA	NA	NA	17.188	NA	NA	NA	19.4935	NA	NA	17.0646	NA	NA
O94856	NA	NA	NA	NA	NA	NA	18.0934	NA	18.3814	NA	NA	NA	NA	NA	NA	NA	NA	NA	NA	NA	16.7405	NA	NA	NA	NA	19.3555	NA	NA	NA	NA	NA	15.7477	NA	NA	NA	NA	NA	16.4066	NA	NA	NA	NA	NA	16.8884	17.1332	NA	NA
O94886	NA	NA	NA	NA	NA	NA	NA	NA	NA	NA	NA	NA	NA	NA	NA	NA	NA	NA	16.1836	NA	NA	NA	NA	NA	15.7229	NA	NA	NA	NA	NA	NA	NA	NA	NA	NA	NA	NA	NA	NA	NA	NA	18.7512	NA	NA	NA	NA	NA
O94901	NA	NA	NA	NA	NA	NA	NA	15.5302	NA	NA	NA	NA	NA	NA	NA	15.5916	NA	NA	NA	NA	NA	NA	NA	NA	NA	NA	NA	NA	14.5214	NA	16.5259	16.7593	NA	14.8379	NA	NA	NA	NA	NA	NA	NA	18.2041	NA	NA	NA	NA	NA
O94911	NA	22.5127	NA	NA	NA	NA	18.0692	NA	NA	NA	NA	NA	NA	NA	NA	NA	NA	NA	NA	NA	NA	NA	NA	NA	18.222	24.0454	NA	NA	NA	18.0666	NA	NA	NA	NA	NA	NA	NA	17.9905	NA	NA	NA	18.7	NA	NA	NA	NA	NA
O94923	NA	NA	NA	NA	NA	NA	NA	NA	NA	NA	19.2803	NA	NA	17.2022	NA	NA	NA	NA	NA	NA	NA	NA	NA	NA	18.0046	NA	NA	NA	NA	NA	15.9305	17.7863	NA	NA	NA	NA	NA	NA	NA	NA	NA	16.5714	NA	NA	NA	NA	NA
O94933	NA	NA	NA	NA	NA	15.7253	NA	NA	NA	NA	NA	NA	NA	NA	NA	NA	NA	NA	NA	NA	NA	NA	NA	NA	NA	NA	NA	NA	NA	NA	NA	NA	NA	NA	NA	NA	NA	NA	NA	NA	NA	NA	NA	NA	NA	NA	NA
O95084	NA	NA	NA	NA	NA	NA	16.8049	NA	15.7617	NA	NA	NA	NA	NA	NA	NA	NA	NA	16.5279	19.0008	NA	NA	NA	NA	16.7109	NA	NA	NA	NA	NA	NA	NA	NA	NA	NA	NA	15.8108	18.0364	NA	NA	15.5811	16.4679	NA	NA	NA	NA	NA
O95136	18.5345	18.112	NA	NA	19.0702	NA	19.636	NA	17.6282	NA	18.9752	NA	NA	15.163	NA	18.6124	18.424	16.1578	18.1593	20.6432	17.668	14.5074	18.3658	15.686	14.147	18.7994	15.1872	NA	15.2965	16.9153	NA	NA	NA	NA	19.248	NA	17.339	18.1988	NA	19.9757	19.2098	17.764	19.2469	17.9232	19.7708	NA	18.7008
O95158	NA	NA	NA	NA	NA	NA	NA	NA	NA	NA	NA	NA	NA	NA	NA	NA	NA	NA	NA	NA	NA	NA	NA	NA	NA	NA	NA	NA	NA	NA	NA	19.1214	NA	NA	NA	NA	NA	NA	NA	NA	NA	NA	NA	NA	NA	NA	NA
O95183	NA	NA	NA	NA	NA	NA	NA	NA	NA	NA	NA	NA	NA	NA	NA	NA	NA	NA	16.5618	NA	NA	NA	NA	NA	NA	NA	NA	NA	NA	NA	NA	NA	NA	NA	NA	NA	NA	NA	NA	NA	NA	NA	NA	NA	NA	NA	NA
O95196	NA	NA	NA	NA	16.6261	NA	NA	14.384	NA	NA	20.1769	NA	NA	NA	NA	NA	NA	NA	14.4542	14.221	NA	NA	14.8239	NA	NA	NA	NA	NA	NA	NA	NA	NA	17.2804	NA	NA	NA	18.1366	NA	NA	15.6129	14.9598	17.2369	NA	19.0165	12.921	NA	18.0689
O95274	18.5659	NA	NA	NA	14.8288	NA	NA	NA	14.9864	NA	14.6973	18.4118	NA	NA	NA	NA	NA	NA	NA	NA	15.3898	NA	NA	NA	NA	NA	NA	NA	NA	NA	NA	NA	NA	NA	NA	NA	NA	NA	NA	NA	NA	NA	NA	NA	NA	NA	12.5137
O95297	15.9128	15.8852	18.1935	NA	15.2603	14.44	16.2826	15.9862	17.5345	13.3285	18.8603	15.5943	15.0432	17.5217	19.152	16.0292	16.3522	18.1736	18.4345	16.6136	16.8887	14.106	18.9421	13.0893	15.6071	15.8784	12.8365	14.0353	17.3142	17.5421	12.7872	14.6879	14.7281	15.5428	18.3705	15.8726	17.2317	17.3857	19.3087	18.27	15.612	18.5817	13.4747	17.3444	16.4604	13.2653	13.1685
O95302	NA	NA	NA	NA	NA	NA	NA	NA	NA	NA	NA	NA	NA	NA	NA	NA	NA	NA	NA	NA	NA	NA	NA	NA	15.7712	NA	NA	NA	NA	NA	20.5455	19.1146	NA	19.7498	NA	NA	NA	NA	NA	NA	14.901	NA	NA	19.4026	NA	NA	NA
O95427	NA	NA	NA	NA	NA	NA	NA	NA	NA	NA	16.5778	NA	NA	NA	NA	NA	NA	NA	NA	NA	NA	NA	NA	NA	18.9055	NA	NA	NA	NA	NA	NA	NA	NA	NA	NA	NA	NA	NA	NA	NA	NA	NA	NA	17.7644	NA	NA	NA
O95477	13.9485	NA	16.2104	NA	NA	NA	17.8856	NA	19.3161	NA	NA	NA	NA	NA	NA	NA	NA	NA	16.4936	NA	16.8449	NA	NA	21.082	15.367	NA	18.0127	NA	17.6711	16.1112	NA	NA	NA	16.6708	16.7489	NA	NA	18.3524	NA	16.8639	NA	16.8434	NA	NA	16.4843	NA	19.507
O95490	16.3632	NA	NA	NA	17.2418	NA	16.3867	NA	NA	NA	18.0416	NA	NA	18.6064	NA	NA	NA	NA	17.5225	NA	NA	NA	NA	19.3702	17.3683	NA	NA	NA	15.036	16.6566	19.4422	18.1215	13.5301	NA	16.8856	NA	14.9109	NA	NA	NA	NA	17.1531	NA	17.5657	NA	17.6946	15.8367
O95497	17.8041	16.9364	19.7099	NA	NA	NA	16.5436	NA	NA	NA	NA	NA	NA	NA	NA	NA	NA	NA	NA	NA	NA	NA	NA	NA	NA	NA	NA	NA	NA	NA	NA	NA	NA	NA	NA	NA	NA	NA	NA	NA	NA	NA	NA	NA	NA	18.8171	NA
O95498	21.6267	16.9686	NA	NA	NA	16.5416	NA	NA	NA	NA	NA	NA	NA	NA	NA	NA	NA	NA	NA	NA	NA	NA	16.2035	NA	NA	NA	NA	NA	NA	NA	NA	NA	NA	NA	NA	NA	NA	NA	16.4295	16.9123	NA	NA	17.5081	NA	NA	NA	NA
O95754	NA	NA	NA	NA	NA	NA	NA	NA	16.4181	NA	16.1809	NA	NA	16.8313	NA	NA	NA	NA	NA	NA	NA	NA	NA	NA	NA	NA	NA	NA	NA	NA	NA	NA	NA	NA	NA	NA	NA	NA	NA	NA	NA	15.4281	NA	NA	NA	NA	NA
O95841	NA	NA	NA	NA	NA	NA	NA	NA	NA	NA	NA	NA	NA	NA	NA	NA	NA	NA	NA	NA	NA	NA	NA	NA	NA	NA	NA	NA	NA	NA	16.7086	NA	NA	NA	NA	NA	NA	NA	NA	NA	NA	NA	NA	NA	NA	NA	NA
O95857	16.0615	15.921	16.5073	NA	16.6919	NA	18.7044	NA	NA	NA	19.7549	16.769	NA	21.3438	NA	16.0943	15.6473	NA	17.9268	18.3586	15.6271	NA	NA	NA	15.5239	NA	NA	NA	NA	NA	NA	NA	NA	19.4473	NA	NA	NA	NA	16.0913	NA	15.4087	20.2595	12.904	16.7742	16.96	NA	NA
O95858	18.4548	18.2536	NA	NA	21.1595	NA	NA	NA	17.1648	17.4962	19.8999	NA	NA	18.926	17.9869	NA	NA	NA	16.7006	NA	NA	NA	17.0428	NA	NA	NA	NA	NA	NA	NA	NA	15.9267	NA	NA	NA	NA	NA	17.3848	NA	NA	NA	18.1149	NA	NA	19.7383	NA	NA
O95866	NA	16.9011	NA	NA	NA	18.412	NA	NA	NA	NA	NA	NA	NA	NA	NA	NA	NA	NA	NA	NA	NA	NA	NA	NA	NA	NA	NA	17.1905	NA	NA	NA	NA	NA	NA	NA	NA	NA	NA	NA	NA	NA	NA	NA	NA	NA	NA	NA
O95971	NA	NA	NA	NA	NA	NA	NA	NA	NA	NA	NA	NA	NA	NA	NA	NA	NA	21.3069	NA	NA	NA	NA	NA	NA	NA	NA	NA	19.3858	NA	NA	NA	NA	NA	NA	NA	NA	NA	NA	NA	NA	NA	NA	NA	NA	NA	NA	NA
O95977	NA	NA	15.6208	NA	NA	NA	NA	NA	NA	15.7457	NA	NA	NA	NA	NA	16.1848	17.3617	18.5842	NA	NA	NA	NA	NA	NA	NA	NA	15.8627	15.6786	17.433	NA	NA	NA	NA	NA	NA	NA	NA	NA	19.0018	NA	NA	NA	NA	NA	NA	NA	NA
O95980	NA	NA	NA	NA	NA	NA	18.2803	NA	NA	NA	NA	NA	NA	NA	16.4033	NA	NA	NA	NA	NA	NA	NA	NA	NA	NA	NA	NA	NA	NA	NA	NA	NA	NA	NA	NA	NA	NA	NA	NA	NA	NA	NA	NA	NA	NA	NA	18.2803
O96005	17.4594	NA	NA	NA	NA	18.9396	15.6056	17.4617	NA	16.8187	17.1272	18.9168	NA	16.6102	NA	NA	NA	NA	16.8852	16.6772	NA	NA	NA	19.431	18.4756	NA	NA	NA	NA	NA	17.4481	19.2105	NA	16.2746	18.3064	NA	NA	NA	NA	NA	18.345	17.3972	NA	21.3091	18.6949	20.2767	NA
O96014	NA	NA	NA	NA	NA	NA	NA	NA	NA	NA	17.7368	NA	NA	NA	NA	NA	NA	NA	NA	NA	NA	NA	NA	NA	NA	NA	NA	NA	NA	NA	NA	NA	NA	NA	NA	NA	NA	NA	NA	NA	NA	NA	NA	NA	NA	NA	NA
P00450	NA	16.7858	NA	NA	NA	16.4558	17.3539	NA	NA	NA	NA	NA	NA	NA	NA	NA	NA	NA	16.4745	NA	NA	17.0736	NA	NA	NA	NA	NA	NA	NA	NA	NA	NA	NA	NA	NA	NA	NA	NA	NA	NA	19.7757	NA	NA	NA	19.1716	NA	NA
P00488	NA	18.3116	NA	NA	NA	NA	NA	NA	NA	NA	NA	NA	NA	NA	NA	NA	NA	NA	NA	NA	NA	NA	NA	NA	NA	NA	NA	NA	NA	NA	NA	NA	NA	NA	NA	NA	NA	NA	NA	NA	NA	NA	NA	NA	NA	NA	NA
P00533	19.3609	11.3522	NA	NA	12.7521	NA	11.7904	NA	13.6862	NA	12.0431	14.2019	NA	15.8598	NA	NA	NA	NA	16.3325	12.4437	12.906	NA	NA	14.2755	NA	10.2685	NA	NA	12.1041	12.9613	11.6552	12.413	NA	11.6148	14.2165	11.3265	15.4613	11.3448	NA	NA	12.9186	18.8204	NA	13.5948	14.5928	14.2411	11.1609
P00734	NA	20.2755	NA	NA	NA	NA	NA	NA	NA	NA	NA	NA	NA	NA	NA	NA	NA	NA	NA	NA	NA	NA	NA	NA	NA	NA	NA	NA	NA	NA	NA	NA	NA	NA	NA	NA	NA	NA	NA	NA	NA	NA	NA	NA	NA	NA	NA
P00738	NA	18.2593	NA	20.4068	16.0348	16.381	NA	NA	NA	NA	NA	15.9279	NA	NA	NA	NA	NA	NA	NA	NA	16.9059	NA	NA	NA	NA	NA	NA	15.0688	NA	NA	NA	NA	NA	NA	17.7106	13.4864	18.311	16.7376	NA	NA	NA	NA	NA	NA	NA	NA	17.2184
P00749	19.3631	NA	NA	NA	18.0057	NA	20.6144	NA	18.8447	NA	NA	NA	17.8249	NA	NA	NA	NA	NA	18.5797	19.6684	NA	NA	NA	NA	NA	NA	18.9743	NA	NA	NA	NA	17.2899	NA	17.6336	22.1392	NA	18.589	17.0527	NA	NA	17.4721	20.2353	NA	17.4756	17.8976	17.8372	17.9807
P00750	NA	NA	NA	NA	NA	NA	NA	NA	NA	NA	NA	NA	NA	NA	NA	NA	NA	NA	NA	NA	16.403	NA	NA	NA	NA	NA	NA	NA	NA	NA	NA	17.6014	NA	NA	NA	NA	NA	NA	NA	NA	NA	18.1145	NA	NA	NA	NA	NA
P01009	18.0379	17.0183	NA	NA	NA	NA	NA	NA	NA	NA	NA	NA	NA	NA	NA	NA	NA	NA	NA	NA	NA	17.0429	NA	NA	NA	NA	NA	14.4511	NA	NA	NA	NA	NA	NA	NA	NA	NA	NA	NA	NA	NA	15.9879	NA	18.9067	NA	NA	NA
P01011	NA	17.4001	NA	17.4001	NA	NA	NA	NA	NA	NA	NA	NA	NA	NA	NA	NA	NA	NA	NA	NA	NA	NA	NA	NA	NA	NA	NA	NA	NA	NA	NA	NA	NA	NA	NA	NA	NA	NA	NA	NA	NA	NA	NA	NA	NA	NA	NA
P01023	NA	NA	NA	NA	NA	NA	NA	NA	NA	NA	NA	20.6877	NA	NA	NA	NA	NA	NA	NA	NA	NA	NA	NA	NA	NA	NA	NA	NA	NA	NA	NA	NA	NA	NA	NA	NA	NA	NA	NA	NA	NA	NA	NA	NA	NA	NA	NA
P01024	NA	NA	NA	NA	17.2686	NA	NA	NA	NA	NA	NA	NA	NA	NA	NA	NA	NA	NA	NA	NA	NA	NA	NA	NA	NA	NA	NA	NA	NA	NA	NA	NA	NA	NA	NA	NA	20.102	NA	NA	NA	NA	NA	NA	NA	NA	NA	NA
P01033	NA	NA	NA	17.4786	NA	18.6837	18.1949	NA	NA	19.074	18.4097	19.17	NA	18.9347	19.7166	20.5768	NA	20.0718	16.9896	18.3685	16.1463	NA	NA	17.0916	18.2641	NA	20.1886	NA	18.5436	17.1652	19.149	20.6745	NA	19.3603	20.0363	NA	NA	NA	NA	NA	17.6044	19.1068	NA	23.6539	18.2677	NA	18.8064
P01042	NA	19.0531	NA	18.43	NA	NA	NA	NA	NA	NA	NA	NA	NA	NA	NA	NA	NA	NA	NA	NA	NA	NA	NA	NA	NA	NA	NA	NA	NA	NA	NA	NA	NA	NA	NA	NA	NA	NA	NA	NA	NA	NA	NA	NA	NA	NA	NA
P01130	NA	NA	NA	NA	NA	NA	NA	NA	NA	19.6495	NA	18.4511	NA	16.9828	NA	NA	NA	NA	NA	NA	NA	NA	NA	NA	NA	NA	NA	NA	NA	NA	NA	NA	NA	19.6495	NA	NA	NA	NA	NA	NA	NA	NA	NA	NA	NA	NA	NA
P01137	17.9148	NA	NA	NA	NA	18.331	16.2395	17.444	NA	15.962	NA	NA	NA	NA	NA	18.208	18.5199	NA	NA	NA	NA	NA	NA	NA	NA	NA	16.1386	NA	NA	NA	NA	18.0959	NA	NA	NA	NA	NA	NA	NA	16.824	NA	17.3619	16.6686	16.2554	12.2342	NA	NA
P01589	NA	NA	NA	NA	NA	NA	NA	NA	NA	18.9434	NA	NA	NA	NA	NA	NA	NA	17.9142	NA	NA	NA	NA	NA	NA	NA	NA	NA	NA	NA	NA	NA	NA	NA	NA	NA	NA	NA	NA	NA	NA	NA	NA	NA	NA	NA	NA	NA
P01730	NA	NA	NA	NA	NA	18.9055	NA	NA	NA	NA	NA	NA	NA	NA	NA	NA	NA	19.3206	NA	NA	NA	18.8853	NA	NA	NA	NA	NA	NA	NA	NA	NA	NA	NA	NA	NA	NA	NA	NA	NA	NA	NA	NA	NA	NA	NA	NA	NA
P01733	NA	NA	NA	NA	NA	17.183	NA	NA	NA	NA	NA	16.7022	NA	NA	21.0892	NA	NA	NA	NA	NA	NA	16.8139	NA	NA	NA	NA	NA	NA	NA	NA	NA	NA	NA	NA	NA	NA	NA	NA	NA	NA	NA	NA	NA	NA	NA	NA	NA
P01737	NA	NA	NA	NA	NA	NA	NA	NA	NA	NA	NA	NA	NA	NA	18.7351	NA	NA	NA	NA	NA	NA	NA	NA	NA	NA	NA	NA	NA	NA	NA	NA	NA	NA	NA	NA	NA	NA	NA	NA	NA	NA	NA	NA	NA	NA	NA	NA
P01848	NA	NA	NA	NA	NA	21.7895	NA	NA	NA	NA	NA	NA	NA	NA	18.239	NA	NA	NA	NA	NA	NA	18.4645	NA	NA	NA	NA	NA	NA	NA	NA	NA	NA	NA	NA	NA	NA	NA	NA	NA	NA	NA	NA	NA	NA	NA	NA	NA
P01850	NA	NA	NA	NA	NA	19.3418	NA	NA	NA	NA	NA	NA	16.3339	NA	16.9692	NA	NA	NA	NA	NA	NA	14.3689	NA	NA	NA	NA	NA	22.5839	NA	NA	NA	NA	NA	NA	NA	NA	NA	NA	NA	NA	NA	NA	NA	NA	NA	NA	NA
P01857	NA	NA	NA	NA	NA	NA	NA	NA	NA	NA	NA	NA	NA	NA	NA	NA	15.4112	NA	NA	NA	NA	17.5936	16.4005	NA	NA	NA	NA	17.1395	NA	NA	NA	NA	NA	NA	NA	NA	NA	NA	NA	NA	NA	NA	NA	NA	NA	NA	NA
P01859	NA	19.7432	NA	17.2604	17.4066	17.4116	NA	NA	NA	NA	NA	NA	NA	NA	NA	NA	NA	NA	NA	NA	NA	NA	NA	NA	NA	NA	NA	17.2343	NA	NA	NA	NA	NA	NA	NA	NA	17.5762	NA	NA	NA	NA	NA	NA	NA	NA	NA	NA
P01861	NA	NA	NA	NA	NA	19.1415	NA	NA	NA	NA	NA	NA	NA	NA	NA	NA	NA	NA	NA	NA	NA	NA	NA	NA	15.9672	NA	NA	NA	NA	NA	NA	19.0161	NA	15.8143	NA	NA	NA	NA	NA	NA	NA	15.868	NA	NA	NA	NA	NA
P01871	13.7432	16.0266	NA	NA	NA	NA	NA	19.3074	NA	NA	NA	NA	NA	NA	NA	NA	NA	14.2093	NA	NA	NA	13.1551	NA	NA	NA	NA	NA	15.8824	13.8889	NA	NA	NA	NA	NA	NA	NA	NA	NA	NA	19.0818	NA	NA	16.0528	NA	NA	NA	NA
P01876	NA	NA	NA	20.0661	NA	17.0934	NA	NA	NA	NA	NA	NA	NA	NA	NA	NA	NA	NA	NA	NA	NA	NA	NA	NA	NA	NA	NA	NA	NA	NA	NA	NA	NA	NA	NA	NA	18.1184	NA	NA	NA	NA	NA	NA	NA	NA	NA	NA
P01889	19.6678	15.1235	15.8565	NA	NA	16.7912	17.5293	NA	NA	21.0229	15.5654	NA	NA	NA	17.642	NA	NA	NA	NA	NA	NA	19.8435	NA	NA	NA	14.0579	NA	16.4837	16.4064	NA	NA	NA	NA	NA	14.7022	NA	NA	NA	NA	NA	NA	21.6053	20.6921	NA	NA	18.9494	NA
P01892	13.3116	15.5731	17.7032	NA	9.32458	19.1486	18.0272	17.4396	13.2138	17.4914	10.0699	8.72737	8.84333	15.6201	8.40758	7.23429	7.32804	12.0236	17.3575	19.6987	11.6133	11.5222	7.04859	16.3704	17.8073	16.8252	10.8134	19.0731	11.0832	6.93525	NA	NA	NA	NA	19.5977	14.9378	15.3682	21.2032	18.304	16.6493	20.2403	20.0363	19.1218	15.894	21.2036	8.43251	12.2254
P01903	NA	13.071	17.4742	NA	NA	14.2535	NA	18.3158	NA	19.8385	NA	NA	NA	NA	NA	19.9666	19.8666	17.595	NA	12.8763	19.022	20.2781	18.802	19.3938	15.8087	NA	NA	NA	15.0475	NA	NA	NA	NA	NA	NA	NA	NA	NA	19.3044	19.7876	NA	NA	17.8843	NA	NA	NA	NA
P01909	NA	17.3062	NA	NA	NA	NA	NA	NA	NA	NA	NA	NA	NA	NA	NA	20.7553	22.5256	19.7192	NA	NA	NA	19.0948	17.623	17.0446	NA	NA	NA	NA	18.8882	NA	NA	NA	NA	NA	NA	NA	NA	NA	17.9802	19.4965	NA	NA	19.384	NA	NA	NA	NA
P01911	NA	NA	NA	NA	NA	NA	NA	NA	NA	19.8057	NA	NA	NA	NA	NA	NA	17.8477	NA	NA	NA	NA	20.9113	NA	NA	NA	NA	NA	NA	NA	NA	NA	NA	NA	NA	NA	NA	NA	NA	NA	NA	NA	NA	NA	NA	NA	NA	NA
P01920	20.0838	NA	NA	NA	NA	NA	NA	NA	NA	18.6392	NA	NA	NA	NA	NA	18.1564	17.9254	16.488	NA	NA	NA	NA	13.7463	NA	NA	NA	NA	NA	NA	NA	NA	NA	NA	NA	NA	NA	NA	NA	15.8025	17.8011	NA	NA	17.9727	NA	NA	NA	NA
P02452	NA	NA	NA	NA	NA	NA	18.7877	NA	16.7739	NA	NA	NA	NA	NA	NA	NA	NA	NA	NA	NA	NA	NA	NA	NA	NA	NA	NA	NA	NA	17.8997	17.1374	NA	NA	18.287	NA	20.8983	19.2326	NA	NA	NA	NA	NA	NA	20.6528	NA	NA	NA
P02458	NA	NA	NA	NA	NA	NA	NA	NA	NA	NA	NA	NA	NA	15.7922	NA	NA	NA	NA	NA	NA	NA	NA	NA	NA	NA	NA	NA	NA	NA	NA	19.2585	16.3019	NA	NA	NA	NA	NA	NA	NA	NA	NA	NA	NA	NA	NA	NA	NA
P02461	NA	NA	NA	NA	NA	NA	NA	NA	NA	NA	NA	NA	NA	NA	NA	NA	NA	NA	NA	NA	NA	NA	NA	NA	NA	NA	NA	NA	NA	NA	19.1542	NA	NA	NA	NA	17.946	NA	NA	NA	NA	NA	NA	NA	NA	NA	NA	NA
P02545	NA	NA	NA	NA	NA	NA	NA	NA	NA	NA	NA	18.179	NA	NA	NA	NA	NA	NA	NA	NA	NA	NA	NA	19.4438	19.0104	NA	NA	NA	NA	NA	17.2101	17.274	NA	18.4306	NA	NA	NA	NA	NA	NA	NA	NA	NA	NA	NA	NA	NA
P02671	NA	NA	NA	NA	NA	NA	18.3521	NA	NA	NA	NA	NA	NA	NA	NA	18.3521	NA	NA	NA	NA	NA	NA	NA	NA	NA	NA	NA	NA	NA	NA	NA	NA	NA	NA	NA	NA	NA	NA	NA	NA	NA	17.5026	NA	16.5947	NA	NA	NA
P02675	NA	NA	NA	16.9137	NA	NA	NA	NA	NA	NA	NA	NA	NA	NA	NA	NA	NA	NA	NA	NA	NA	NA	NA	NA	NA	NA	NA	NA	NA	NA	NA	NA	NA	NA	NA	NA	NA	NA	NA	NA	NA	NA	NA	NA	NA	NA	NA
P02749	14.4206	18.7438	NA	17.3563	16.6026	15.8198	NA	NA	NA	NA	NA	15.8703	NA	NA	NA	NA	NA	NA	NA	NA	NA	15.6278	NA	NA	NA	NA	NA	NA	NA	NA	NA	NA	NA	NA	NA	NA	NA	NA	NA	NA	NA	NA	NA	NA	NA	NA	NA
P02751	NA	NA	13.308	17.1117	NA	12.9912	15.4947	NA	20.3404	NA	NA	NA	NA	11.7383	NA	NA	NA	NA	15.4956	16.0598	17.9887	NA	NA	16.8427	15.9803	16.7463	NA	16.1558	NA	17.7097	17.9617	NA	NA	16.2012	18.1142	NA	19.7545	14.3933	NA	NA	16.3834	16.1417	NA	14.9886	NA	15.4208	14.9827
P02760	NA	17.2685	NA	NA	NA	NA	NA	NA	NA	NA	NA	NA	NA	NA	NA	NA	NA	NA	NA	NA	NA	NA	NA	NA	NA	NA	NA	NA	NA	NA	NA	NA	NA	NA	NA	NA	NA	NA	NA	NA	NA	NA	NA	NA	NA	17.8276	NA
P02763	17.9417	17.9664	NA	NA	NA	NA	NA	NA	NA	NA	NA	NA	NA	NA	NA	NA	NA	NA	NA	NA	17.8076	NA	NA	NA	NA	NA	NA	NA	NA	NA	NA	NA	NA	NA	NA	NA	NA	NA	NA	NA	NA	NA	NA	17.0189	NA	NA	NA
P02765	NA	17.9768	NA	19.1327	NA	NA	NA	NA	NA	NA	NA	NA	NA	NA	NA	NA	NA	NA	NA	NA	NA	NA	NA	NA	NA	NA	NA	NA	NA	NA	NA	NA	NA	NA	NA	NA	NA	NA	NA	NA	NA	NA	NA	NA	NA	NA	NA
P02786	16.7337	10.3431	14.7233	NA	13.1485	NA	16.8454	17.8223	15.983	18.849	17.7423	18.1285	17.9261	16.1023	16.6549	17.1662	17.9692	17.4144	17.7342	17.7506	NA	12.1035	17.4548	17.3342	19.2007	10.0989	18.7699	NA	16.7256	16.4007	17.8233	18.2392	NA	19.0141	16.8098	NA	NA	NA	17.1893	16.6802	18.0413	18.4503	17.3675	16.4462	15.6752	13.2505	13.1485
P02787	NA	NA	NA	NA	NA	NA	NA	NA	NA	NA	NA	NA	NA	NA	NA	NA	NA	NA	NA	NA	NA	NA	NA	NA	19.4103	NA	NA	NA	NA	NA	NA	NA	NA	NA	16.5977	NA	NA	NA	NA	NA	NA	NA	NA	NA	NA	NA	NA
P02788	17.5891	17.3026	NA	NA	NA	NA	NA	NA	NA	NA	NA	NA	NA	NA	NA	NA	NA	NA	NA	NA	NA	NA	NA	NA	NA	NA	NA	NA	NA	NA	NA	NA	NA	NA	NA	NA	NA	NA	NA	NA	NA	NA	NA	NA	NA	NA	NA
P02790	NA	19.2119	NA	18.3661	17.9209	NA	NA	NA	NA	NA	17.5948	NA	NA	16.8306	NA	NA	NA	NA	NA	NA	NA	NA	NA	NA	NA	NA	NA	NA	NA	NA	NA	19.784	NA	NA	NA	NA	18.236	18.5217	NA	NA	NA	NA	NA	18.0588	NA	NA	17.6056
P03989	NA	NA	19.7404	NA	16.4554	16.1507	17.7433	NA	NA	21.0573	NA	NA	NA	NA	NA	NA	NA	NA	NA	NA	NA	NA	NA	NA	NA	NA	NA	15.9916	20.7583	NA	NA	NA	NA	NA	NA	NA	NA	NA	NA	19.1292	NA	NA	20.2233	NA	NA	NA	16.5686
P04004	17.9681	20.4715	NA	17.9681	17.2174	NA	NA	20.4502	NA	21.7667	NA	NA	NA	NA	NA	21.9938	20.854	21.6552	20.3732	NA	NA	NA	20.8282	NA	NA	NA	21.5094	NA	NA	NA	NA	21.9835	NA	NA	NA	NA	23.407	20.2249	NA	NA	19.239	NA	NA	19.2499	NA	NA	17.2174
P04062	17.3449	NA	NA	NA	NA	10.5336	12.7866	NA	NA	17.1595	12.3625	15.945	NA	17.3967	NA	NA	NA	NA	15.0415	14.1621	NA	NA	17.994	16.2441	17.3899	NA	NA	20.7383	NA	NA	19.4318	19.5692	NA	18.178	NA	NA	NA	NA	NA	NA	13.9074	17.4758	NA	16.0027	17.4746	NA	NA
P04114	NA	18.4724	NA	NA	NA	NA	NA	NA	NA	NA	NA	NA	NA	NA	NA	NA	NA	NA	NA	NA	NA	NA	NA	NA	NA	NA	NA	NA	NA	NA	NA	NA	NA	NA	NA	NA	NA	NA	NA	NA	NA	NA	NA	NA	NA	NA	NA
P04156	19.2941	15.7839	17.0461	NA	18.0664	19.3973	20.0888	15.5955	19.9257	15.6073	18.9041	17.322	17.6732	NA	13.0967	16.4017	16.753	19.5872	20.5101	20.7886	19.8865	15.473	15.9265	16.5904	17.1307	19.8183	17.1515	17.1559	13.5435	17.9575	14.525	15.3654	18.6611	17.6625	21.2621	18.7436	17.5145	20.1591	16.7181	16.7607	18.9293	21.073	16.552	19.8634	19.8012	15.6029	21.5089
P04216	16.1131	17.3204	18.4025	NA	16.509	NA	19.4621	NA	18.0072	17.2335	NA	NA	NA	21.4485	18.601	NA	NA	NA	19.2564	19.4404	NA	18.5424	22.2719	18.4337	18.9641	NA	NA	NA	15.2906	16.3458	15.7487	16.5958	NA	18.1559	18.4169	NA	NA	19.7708	20.6731	NA	17.148	19.2364	NA	18.6695	19.0062	NA	17.3618
P04222	NA	NA	NA	NA	NA	NA	17.9992	NA	NA	NA	NA	NA	NA	NA	NA	NA	NA	NA	NA	NA	NA	NA	NA	NA	NA	NA	NA	18.9186	NA	NA	NA	NA	NA	NA	NA	NA	NA	NA	NA	NA	NA	NA	NA	NA	NA	NA	NA
P04229	NA	20.9119	17.5566	NA	NA	16.3587	NA	16.3793	NA	20.0868	NA	NA	NA	NA	NA	19.9591	19.245	17.9156	NA	16.3314	16.641	19.806	14.8368	NA	NA	NA	NA	NA	17.6056	NA	NA	NA	NA	NA	NA	NA	NA	NA	16.3827	20.2964	NA	NA	20.486	NA	NA	NA	NA
P04233	14.8223	16.2108	19.2293	NA	NA	NA	NA	18.2378	NA	18.0247	NA	NA	NA	NA	NA	17.2296	18.6773	18.2296	NA	NA	NA	17.9308	17.1542	16.8089	16.2002	NA	NA	NA	19.1144	NA	NA	NA	NA	NA	NA	NA	NA	NA	17.5166	17.7393	NA	16.2941	18.9425	NA	NA	16.0327	NA
P04234	NA	NA	NA	NA	NA	17.3316	NA	NA	NA	NA	NA	NA	NA	NA	NA	NA	NA	NA	NA	NA	NA	13.5454	NA	NA	NA	NA	NA	NA	NA	NA	NA	NA	NA	NA	NA	NA	NA	NA	NA	NA	NA	NA	NA	NA	NA	NA	NA
P04264	NA	NA	NA	NA	NA	NA	NA	17.257	NA	NA	NA	NA	NA	NA	NA	NA	NA	NA	17.7817	NA	NA	NA	17.257	NA	18.4354	NA	NA	NA	NA	NA	NA	NA	NA	NA	17.5605	NA	NA	NA	NA	NA	NA	NA	NA	NA	NA	NA	NA
P04275	NA	17.7034	NA	NA	NA	16.3535	NA	NA	NA	NA	NA	NA	NA	NA	NA	NA	NA	NA	NA	NA	NA	NA	NA	NA	NA	NA	NA	NA	NA	NA	NA	NA	NA	NA	NA	NA	NA	NA	NA	NA	NA	NA	NA	NA	NA	NA	NA
P04406	NA	NA	NA	NA	NA	16.4945	NA	18.1916	NA	17.3445	18.0518	NA	NA	21.4426	NA	17.8538	18.0363	17.3307	NA	17.037	NA	NA	18.584	NA	NA	NA	NA	19.4333	16.4478	NA	16.4945	19.362	NA	19.4678	NA	NA	NA	NA	19.0176	NA	NA	NA	NA	NA	NA	NA	NA
P04435	NA	NA	NA	NA	NA	18.7081	NA	NA	NA	NA	NA	NA	NA	NA	NA	NA	NA	NA	NA	NA	NA	NA	NA	NA	NA	NA	NA	NA	NA	NA	NA	NA	NA	NA	NA	NA	NA	NA	NA	NA	NA	NA	NA	NA	NA	NA	NA
P04439	17.8512	16.6031	18.3933	NA	18.7448	20.2471	18.7586	15.7475	19.1696	18.7161	15.4928	17.217	NA	NA	18.5138	NA	NA	17.2646	NA	NA	16.53	21.4055	NA	NA	NA	16.5435	18.932	19.1501	17.6362	15.5766	NA	NA	NA	NA	18.9082	20.1684	16.6272	19.2064	17.6608	NA	NA	16.6974	18.7347	NA	17.3627	17.211	18.245
P04440	NA	18.2463	19.6035	NA	16.3881	17.622	NA	16.5269	NA	17.9487	19.7463	NA	NA	NA	NA	18.4745	18.6735	17.9994	15.6555	21.1214	NA	20.2977	17.6301	16.5514	16.0153	14.5677	NA	NA	18.4548	NA	NA	NA	NA	NA	NA	NA	NA	NA	18.2131	19.9032	16.5588	NA	17.942	NA	NA	NA	NA
P04626	20.1063	NA	NA	NA	23.328	NA	NA	NA	NA	NA	20.3103	19.6306	NA	NA	NA	NA	NA	NA	16.8253	16.1807	15.5903	NA	NA	16.8401	NA	NA	NA	NA	NA	18.8556	NA	NA	NA	NA	21.7421	NA	NA	NA	NA	NA	18.6789	16.3903	NA	NA	17.4717	NA	21.8707
P04629	NA	NA	NA	NA	NA	NA	20.2993	NA	NA	18.7095	NA	NA	NA	NA	NA	18.2263	19.4804	19.2376	NA	NA	NA	NA	NA	NA	NA	NA	NA	NA	NA	NA	NA	NA	NA	NA	NA	NA	NA	NA	NA	NA	NA	NA	NA	NA	NA	NA	NA
P04632	NA	NA	NA	NA	NA	NA	NA	NA	NA	NA	NA	NA	NA	NA	NA	NA	NA	NA	15.1431	16.8537	NA	NA	NA	NA	NA	NA	NA	NA	NA	NA	NA	NA	NA	NA	NA	NA	NA	NA	NA	NA	16.1987	NA	NA	NA	NA	NA	NA
P04839	NA	15.1826	16.1994	17.2056	NA	17.2193	NA	NA	NA	NA	NA	NA	19.4429	NA	NA	NA	NA	NA	NA	NA	NA	20.8544	15.7042	NA	NA	NA	17.5532	15.2651	19.7455	NA	NA	NA	NA	NA	NA	NA	NA	NA	20.1758	19.0209	NA	NA	15.0503	NA	NA	NA	NA
P04843	NA	NA	18.0526	NA	NA	NA	17.9173	18.9808	18.7428	NA	19.6059	NA	NA	19.3492	NA	NA	17.0597	NA	NA	NA	NA	NA	NA	16.5573	18.2074	NA	18.1518	NA	NA	NA	21.2441	21.4851	NA	20.2723	NA	19.9569	NA	NA	NA	NA	NA	15.374	NA	16.728	21.2733	NA	NA
P04844	NA	NA	NA	NA	NA	NA	NA	NA	NA	NA	NA	NA	NA	17.1106	NA	NA	NA	NA	NA	NA	NA	NA	NA	NA	NA	NA	NA	NA	NA	NA	17.2592	18.4235	NA	17.0161	NA	NA	NA	NA	NA	NA	NA	NA	NA	NA	NA	NA	NA
P04920	NA	NA	NA	NA	NA	NA	NA	NA	NA	NA	NA	NA	NA	NA	17.3141	NA	NA	NA	NA	NA	NA	NA	NA	NA	NA	NA	NA	NA	NA	NA	NA	NA	NA	NA	NA	NA	NA	NA	NA	NA	NA	NA	NA	NA	NA	NA	NA
P05023	16.3381	NA	NA	NA	NA	NA	NA	16.02	NA	NA	NA	NA	NA	NA	NA	16.6646	NA	NA	NA	NA	NA	NA	NA	NA	NA	NA	NA	NA	NA	NA	NA	NA	NA	NA	NA	NA	NA	NA	NA	NA	NA	NA	NA	NA	NA	NA	NA
P05026	14.6568	NA	21.8371	NA	18.1858	NA	17.2779	17.0659	12.1756	NA	19.78	16.977	NA	17.163	16.8856	17.6194	18.8151	NA	20.1537	18.073	20.0189	12.3362	13.9576	14.4869	20.3424	NA	16.1292	16.3683	15.3987	14.0729	14.92	18.6743	12.3661	22.5118	12.4405	NA	16.1336	15.8677	NA	10.9106	16.7436	21.3708	16.7284	19.7307	15.1913	15.8651	15.0448
P05090	NA	18.0635	NA	NA	NA	NA	NA	NA	NA	NA	NA	NA	NA	NA	NA	NA	NA	NA	NA	NA	NA	NA	NA	18.8754	19.7371	NA	NA	NA	NA	NA	NA	NA	NA	NA	NA	NA	NA	NA	NA	NA	NA	NA	NA	NA	NA	NA	NA
P05106	NA	19.553	NA	NA	NA	NA	15.0014	NA	NA	NA	NA	NA	NA	NA	NA	NA	NA	NA	NA	NA	18.6347	NA	14.2302	NA	14.8249	NA	NA	NA	NA	NA	NA	NA	NA	NA	19.9063	NA	17.9269	NA	NA	NA	NA	18.1353	NA	23.0183	NA	NA	NA
P05107	NA	15.7824	17.5934	12.9793	NA	15.2806	NA	14.6736	NA	NA	NA	15.5857	22.0189	NA	14.6757	NA	NA	NA	NA	NA	NA	22.1728	16.1829	NA	NA	NA	17.1537	19.0102	14.4801	NA	NA	17.3843	NA	NA	NA	NA	13.699	17.2163	16.6659	15.1091	NA	NA	18.4484	14.7852	NA	NA	NA
P05120	NA	NA	NA	NA	NA	NA	NA	NA	NA	NA	NA	NA	NA	NA	NA	NA	NA	NA	NA	NA	NA	NA	NA	NA	NA	NA	NA	NA	NA	NA	NA	NA	NA	19.0046	NA	NA	NA	NA	NA	NA	NA	NA	NA	NA	NA	NA	NA
P05155	NA	NA	NA	NA	NA	NA	NA	NA	NA	NA	NA	NA	NA	NA	NA	NA	NA	NA	NA	NA	NA	NA	NA	NA	NA	NA	NA	NA	NA	NA	NA	NA	NA	NA	NA	NA	NA	NA	NA	NA	NA	NA	NA	17.9318	NA	NA	NA
P05164	NA	18.7608	15.8118	NA	NA	NA	NA	NA	NA	NA	NA	NA	17.6354	NA	NA	NA	NA	NA	NA	NA	NA	NA	NA	NA	NA	NA	20.9197	NA	NA	NA	17.3485	NA	NA	NA	NA	NA	NA	NA	NA	NA	NA	NA	NA	23.4426	18.992	13.7714	NA
P05186	NA	16.4139	NA	NA	NA	NA	16.6338	NA	NA	NA	NA	NA	NA	NA	NA	NA	NA	NA	NA	NA	NA	NA	NA	NA	NA	16.7356	NA	NA	18.0656	NA	20.115	NA	NA	NA	18.0936	NA	18.5006	NA	NA	16.7782	NA	NA	NA	NA	NA	NA	NA
P05187	19.9409	NA	NA	NA	NA	NA	NA	NA	NA	NA	NA	17.4988	NA	NA	NA	NA	NA	NA	NA	NA	NA	NA	NA	NA	NA	NA	NA	NA	NA	NA	NA	NA	NA	NA	NA	NA	19.1176	NA	NA	NA	NA	NA	NA	NA	NA	NA	NA
P05362	18.1741	16.0355	17.9451	15.9269	16.1329	14.4071	15.5196	15.3306	20.7304	18.387	23.3468	15.5918	18.1538	20.9064	14.7994	18.4392	18.5423	17.2635	16.3569	13.9194	20.0017	16.3697	18.1527	15.0141	16.9615	NA	17.1061	17.3207	16.1908	18.8834	11.843	13.8027	NA	NA	19.3012	16.2513	17.8986	19.8288	16.415	16.9992	16.5376	NA	17.4077	NA	13.3302	19.1691	19.021
P05387	NA	NA	NA	NA	NA	NA	NA	15.4668	NA	NA	NA	NA	NA	NA	15.936	NA	17.7322	NA	19.7814	NA	NA	NA	16.9827	NA	NA	NA	NA	NA	NA	NA	NA	NA	NA	NA	NA	NA	NA	NA	15.8381	NA	NA	NA	NA	17.0327	NA	NA	NA
P05538	NA	18.1716	16.1561	NA	NA	NA	NA	NA	NA	20.2645	NA	NA	NA	NA	NA	NA	20.9305	19.4057	NA	NA	NA	19.0961	17.0744	NA	NA	NA	NA	NA	20.1457	NA	NA	NA	NA	NA	NA	NA	NA	NA	NA	19.7773	NA	NA	18.3402	NA	NA	NA	NA
P05556	18.6699	16.66	17.3323	NA	18.534	16.4337	17.2801	13.3541	19.7965	13.507	17.2573	16.2782	14.1652	12.025	20.578	13.2143	13.582	17.887	16.3649	15.5954	17.3068	12.8835	NA	16.0826	15.1952	13.4776	15.0921	16.5071	15.4264	17.9254	12.8816	15.0544	13.3125	15.3093	20.128	13.445	17.1193	20.0437	14.0576	11.0403	15.1637	17.542	12.2759	19.1517	14.7491	17.163	19.1839
P05997	NA	NA	NA	NA	NA	NA	NA	NA	17.7008	NA	NA	17.6257	NA	NA	NA	NA	NA	NA	NA	NA	NA	NA	NA	19.9475	17.3924	NA	NA	NA	NA	NA	NA	19.9983	NA	20.6119	NA	NA	NA	NA	NA	NA	NA	NA	NA	20.1063	NA	NA	NA
P06127	17.1921	NA	NA	NA	NA	19.2739	NA	NA	NA	NA	NA	16.4756	NA	NA	15.1986	NA	NA	NA	NA	NA	NA	16.3	NA	NA	NA	NA	NA	19.2269	NA	NA	NA	NA	NA	NA	NA	NA	NA	NA	NA	NA	NA	21.302	NA	NA	NA	NA	NA
P06213	15.663	16.5594	18.0512	NA	NA	NA	16.6499	NA	NA	NA	18.6621	17.4763	19.0102	18.8277	17.5409	NA	14.7152	NA	16.6831	14.3492	18.3317	NA	13.2615	15.7229	NA	NA	17.6777	NA	16.3558	13.2516	13.2717	15.4977	NA	NA	16.9855	NA	14.9731	16.1861	NA	16.7169	14.5408	18.2105	NA	14.7742	16.0726	NA	15.057
P06276	NA	NA	NA	NA	NA	NA	NA	NA	NA	NA	17.6488	NA	NA	NA	NA	NA	NA	NA	NA	NA	NA	NA	NA	NA	NA	NA	NA	NA	NA	NA	NA	16.9906	NA	NA	NA	NA	NA	NA	NA	NA	NA	NA	NA	NA	NA	NA	NA
P06280	NA	NA	NA	NA	NA	NA	NA	NA	NA	NA	22.8928	NA	NA	NA	NA	NA	NA	NA	NA	NA	NA	NA	NA	NA	16.4776	NA	NA	NA	NA	NA	16.9059	NA	NA	NA	NA	NA	NA	NA	NA	NA	NA	NA	NA	NA	NA	NA	NA
P06729	NA	NA	NA	NA	NA	19.3435	NA	NA	NA	NA	NA	NA	NA	NA	NA	NA	NA	NA	NA	NA	NA	19.9794	NA	NA	NA	NA	NA	NA	NA	NA	NA	NA	NA	NA	NA	NA	NA	NA	NA	NA	NA	NA	NA	NA	NA	NA	NA
P06733	NA	NA	NA	NA	NA	NA	NA	NA	NA	NA	15.8782	NA	NA	NA	NA	17.2108	NA	NA	NA	NA	NA	NA	NA	NA	NA	NA	NA	18.4441	NA	NA	15.8782	17.7871	NA	15.8782	NA	NA	NA	NA	NA	NA	NA	NA	NA	NA	NA	NA	NA
P06734	NA	NA	NA	NA	NA	NA	NA	NA	NA	NA	NA	NA	NA	NA	NA	NA	NA	NA	NA	NA	NA	NA	NA	NA	NA	NA	NA	NA	16.9085	NA	NA	NA	NA	NA	NA	NA	NA	NA	NA	NA	NA	NA	NA	NA	NA	NA	NA
P06744	NA	NA	NA	NA	NA	NA	NA	NA	NA	NA	NA	NA	17.3759	NA	17.3759	18.4496	NA	NA	NA	NA	NA	NA	NA	NA	NA	NA	NA	NA	NA	NA	18.565	NA	NA	NA	NA	NA	NA	NA	NA	NA	NA	NA	NA	NA	NA	NA	NA
P06756	18.0045	14.8891	12.0015	13.5808	18.7988	12.1931	17.3974	10.5197	18.6073	12.3563	16.5542	18.1355	NA	17.7761	15.0839	12.18	10.737	17.2022	17.7669	18.9193	19.1241	NA	13.2624	15.7983	17.9009	14.9261	NA	13.8421	16.1746	20.1549	13.1495	19.4698	11.6583	14.4115	19.5698	14.3946	17.007	15.1184	10.7401	NA	18.2592	17.484	NA	17.8213	17.5659	17.6376	17.3222
P06865	NA	NA	NA	NA	NA	NA	NA	NA	NA	NA	18.5005	NA	NA	NA	NA	NA	NA	NA	NA	NA	NA	NA	NA	20.1464	20.368	NA	NA	NA	NA	NA	19.6147	19.9525	NA	19.1432	NA	NA	NA	NA	NA	NA	NA	16.9696	NA	19.2956	16.2431	NA	NA
P07093	NA	NA	NA	NA	NA	NA	14.5415	NA	NA	NA	NA	NA	NA	NA	NA	NA	NA	NA	NA	NA	15.4334	NA	NA	15.6945	19.9309	NA	NA	NA	NA	NA	16.8053	16.4547	NA	19.267	13.3049	NA	NA	NA	NA	NA	17.3218	14.289	NA	NA	NA	NA	NA
P07204	18.9195	NA	NA	NA	NA	NA	18.9316	NA	NA	NA	NA	NA	NA	NA	NA	NA	NA	NA	19.7141	18.738	NA	NA	NA	NA	NA	NA	18.6308	NA	NA	19.1136	NA	NA	NA	NA	NA	NA	NA	NA	NA	NA	NA	NA	NA	NA	NA	NA	NA
P07339	NA	19.3554	NA	NA	NA	17.0462	16.7854	NA	NA	NA	18.7885	NA	NA	21.395	NA	17.864	NA	NA	16.3523	17.8965	NA	NA	16.7412	18.6331	20.5808	NA	NA	NA	NA	NA	21.3713	22.3786	NA	21.3729	NA	19.3666	NA	NA	NA	NA	18.2781	19.6223	NA	19.5139	18.732	NA	15.5971
P07437	16.4882	NA	NA	NA	NA	NA	NA	NA	NA	NA	NA	NA	NA	NA	NA	NA	16.4882	NA	NA	NA	NA	NA	NA	NA	NA	NA	NA	NA	NA	NA	22.2801	19.4365	NA	21.3931	NA	NA	NA	NA	NA	NA	NA	NA	NA	NA	NA	NA	NA
P07550	NA	NA	NA	NA	NA	NA	NA	NA	NA	NA	NA	NA	NA	NA	NA	NA	NA	NA	14.8554	NA	NA	NA	NA	NA	NA	NA	NA	16.6256	NA	NA	NA	NA	NA	NA	NA	NA	NA	NA	NA	NA	NA	NA	NA	NA	NA	NA	NA
P07585	18.1328	18.4602	NA	17.1379	NA	NA	NA	NA	NA	NA	NA	NA	NA	NA	NA	NA	NA	NA	NA	NA	NA	NA	NA	NA	NA	NA	NA	NA	NA	NA	NA	NA	NA	18.5746	NA	NA	NA	NA	NA	NA	NA	NA	NA	NA	NA	NA	NA
P07602	15.5648	NA	NA	NA	NA	NA	NA	NA	NA	NA	NA	15.0682	NA	NA	NA	NA	NA	NA	NA	NA	NA	NA	NA	16.9224	17.0209	NA	NA	NA	NA	NA	21.129	20.8687	NA	18.6709	NA	NA	NA	NA	NA	NA	NA	14.5251	NA	15.7926	NA	NA	NA
P07686	NA	NA	NA	NA	NA	NA	NA	NA	NA	NA	NA	NA	NA	NA	NA	NA	NA	NA	NA	NA	NA	NA	NA	18.7769	19.7487	NA	NA	NA	NA	NA	18.7943	18.2269	NA	19.2782	NA	NA	NA	NA	NA	NA	NA	19.9707	NA	NA	NA	NA	NA
P07711	NA	NA	NA	NA	NA	NA	NA	NA	NA	NA	16.9869	NA	NA	17.0652	NA	NA	NA	NA	NA	NA	NA	NA	NA	18.9089	19.9369	NA	NA	NA	NA	NA	21.4933	NA	NA	NA	NA	NA	NA	NA	NA	NA	NA	18.2288	NA	19.6436	16.1477	NA	NA
P07737	14.6542	NA	NA	NA	NA	17.7968	NA	NA	NA	NA	NA	NA	NA	15.0606	14.6988	NA	NA	NA	17.882	17.8642	NA	NA	NA	16.2455	14.2755	NA	NA	19.7013	NA	NA	18.7294	19.6524	NA	19.9295	NA	NA	NA	NA	NA	NA	18.6056	17.0987	NA	14.9563	18.0178	NA	18.502
P07942	15.5816	16.3679	NA	17.0678	15.833	NA	15.0129	NA	15.6124	NA	16.9481	16.2841	NA	16.8547	NA	NA	NA	NA	14.6963	16.6938	20.3879	NA	NA	19.9393	19.162	NA	NA	15.5855	17.0201	NA	21.5748	19.9639	17.8512	16.9252	12.4635	NA	16.2268	16.2906	NA	NA	16.9181	17.4903	NA	17.5916	11.7313	NA	16.678
P07949	NA	NA	NA	NA	NA	NA	NA	NA	NA	NA	NA	NA	NA	18.1114	NA	NA	NA	NA	NA	NA	NA	NA	NA	NA	NA	NA	19.7254	NA	NA	NA	NA	NA	NA	NA	NA	NA	NA	NA	NA	NA	NA	NA	NA	NA	NA	NA	NA
P07996	15.3	NA	16.8164	NA	16.5133	16.8152	16.446	16.6944	19.7319	15.2291	NA	14.0564	NA	15.0423	NA	14.7746	14.7649	NA	17.9924	18.4481	16.6258	NA	NA	16.4958	14.0694	17.7365	NA	NA	14.494	15.2854	14.2668	NA	NA	14.3292	16.9638	15.1491	20.391	14.9274	NA	NA	17.8531	16.6549	15.0967	16.8821	16.6511	14.1994	13.888
P08069	16.8931	NA	16.4277	NA	14.1158	15.8742	16.1672	13.7476	15.1024	NA	17.5502	18.1716	16.4086	16.4677	15.3776	NA	16.9378	17.7313	18.4319	14.9598	14.6937	14.109	15.9128	17.8358	20.1932	NA	16.4665	15.888	15.8974	15.0491	13.227	15.9516	17.4735	NA	16.5133	NA	16.7852	NA	15.8647	15.4253	15.708	17.214	17.4565	17.5272	18.1377	NA	17.6078
P08123	17.4396	NA	NA	NA	NA	NA	18.2677	NA	NA	NA	NA	NA	NA	NA	NA	NA	NA	NA	NA	NA	NA	NA	NA	NA	NA	NA	NA	NA	NA	NA	NA	NA	NA	20.051	NA	NA	NA	NA	NA	NA	NA	19.1225	NA	NA	NA	19.9616	NA
P08174	18.6194	14.7187	16.9328	NA	18.2517	16.4727	16.8358	15.262	19.2352	18.0991	18.6982	21.778	16.4974	NA	17.7165	18.2193	16.6587	18.2553	NA	18.4899	15.774	17.4252	16.5087	19.6121	20.3923	NA	17.4781	16.0824	18.2681	20.8251	14.9446	16.3466	NA	16.195	18.8421	NA	16.0157	17.9509	17.4729	15.5975	16.0648	17.3915	16.8037	19.2776	NA	NA	18.0731
P08183	NA	NA	NA	NA	NA	NA	17.9723	NA	NA	NA	16.3066	NA	NA	16.7768	NA	NA	19.4852	NA	18.4569	15.681	NA	NA	NA	NA	NA	NA	NA	17.9723	NA	NA	NA	NA	NA	NA	NA	NA	NA	NA	NA	NA	NA	NA	NA	NA	NA	16.2254	NA
P08195	18.7974	11.3936	15.0195	NA	16.109	18.943	16.2241	15.6954	11.8586	15.6364	15.0942	15.6826	18.2493	19.4112	16.9182	17.1411	17.3313	15.7028	19.1339	17.1315	15.2557	20.22	15.0658	15.3635	19.415	10.7735	17.5725	17.5072	15.7998	18.317	14.7684	17.6306	15.2997	14.9672	17.7544	11.6998	17.3458	15.6503	17.5833	17.4028	17.9336	18.0916	16.939	16.0728	17.9367	19.0072	17.289
P08236	NA	17.4009	14.3355	NA	NA	NA	14.9608	NA	NA	15.4126	17.3945	NA	NA	NA	NA	NA	NA	NA	15.3904	16.9902	NA	NA	NA	16.3132	16.2651	NA	16.7016	NA	NA	NA	18.0183	18.5246	NA	17.3726	NA	19.1706	NA	NA	NA	NA	16.4327	17.1001	NA	20.7161	15.7625	NA	NA
P08246	15.6974	16.7797	NA	15.148	NA	NA	NA	NA	NA	NA	NA	NA	NA	NA	NA	NA	NA	NA	NA	NA	NA	NA	NA	NA	NA	NA	NA	NA	NA	NA	NA	NA	NA	NA	18.1818	NA	NA	NA	NA	NA	NA	NA	NA	NA	NA	NA	NA
P08473	16.3804	15.3551	17.6627	NA	NA	NA	16.9145	NA	18.6179	NA	15.2018	15.7152	21.2039	11.749	NA	17.4956	NA	NA	18.7197	15.8749	NA	NA	NA	NA	NA	15.7988	18.0694	NA	NA	13.2387	15.1597	17.8547	18.7187	17.5755	20.0602	17.1627	19.0779	19.256	NA	15.7555	15.8837	18.8908	14.5533	NA	14.1231	15.7127	20.0013
P08514	NA	NA	NA	NA	NA	19.3205	19.3914	NA	NA	NA	NA	NA	NA	NA	NA	NA	NA	NA	17.9962	NA	NA	NA	NA	NA	NA	NA	NA	NA	NA	NA	NA	NA	NA	NA	NA	NA	NA	NA	NA	NA	NA	19.3205	NA	NA	NA	NA	NA
P08571	NA	NA	NA	NA	NA	NA	NA	NA	NA	NA	NA	NA	18.215	NA	NA	NA	NA	NA	NA	NA	NA	NA	NA	NA	NA	NA	NA	NA	NA	NA	NA	NA	NA	NA	NA	NA	NA	NA	NA	NA	NA	NA	NA	NA	NA	NA	NA
P08575	NA	17.5303	17.1653	NA	NA	18.0721	NA	17.5514	NA	12.9566	NA	13.9427	14.2265	NA	19.9123	13.7704	13.9065	17.6146	NA	NA	NA	21.3803	13.0234	20.3831	NA	NA	20.1109	17.4581	16.9461	NA	NA	NA	NA	NA	NA	NA	NA	NA	18.5569	17.7159	NA	NA	19.2362	NA	NA	18.3225	NA
P08581	17.6154	NA	NA	NA	18.1667	NA	17.881	NA	NA	NA	14.4812	17.6284	NA	NA	NA	18.7708	18.3313	17.9896	18.1671	NA	NA	NA	NA	NA	NA	NA	NA	NA	18.2286	NA	NA	16.9839	NA	NA	NA	NA	17.7792	NA	NA	NA	18.7103	17.7355	21.5394	NA	17.888	NA	22.1806
P08582	18.9392	NA	21.9472	NA	NA	NA	NA	NA	14.0981	NA	NA	NA	NA	NA	NA	16.206	16.1153	NA	NA	NA	NA	NA	16.6164	17.3317	18.2375	NA	NA	NA	NA	13.1141	NA	NA	NA	NA	NA	14.8664	16.3329	15.8845	NA	NA	NA	15.5241	15.2832	17.1816	NA	NA	15.7542
P08603	NA	16.748	NA	17.1154	NA	NA	NA	NA	NA	NA	NA	NA	NA	NA	NA	NA	NA	NA	NA	NA	NA	NA	NA	NA	NA	NA	NA	NA	NA	NA	16.039	17.4348	NA	NA	NA	NA	NA	NA	NA	NA	NA	NA	NA	NA	NA	NA	NA
P08637	NA	NA	NA	NA	NA	NA	NA	NA	NA	NA	NA	NA	NA	NA	NA	NA	NA	NA	NA	NA	NA	NA	NA	NA	NA	NA	NA	17.6011	NA	NA	NA	NA	NA	NA	NA	NA	NA	NA	NA	NA	NA	NA	NA	NA	NA	NA	NA
P08648	17.9	17.2642	17.1548	15.2151	13.0837	15.8724	18.2028	NA	19.5717	NA	16.0769	17.1351	15.5469	NA	21.336	NA	NA	15.7554	16.2618	17.6786	17.0635	15.0758	NA	11.9808	13.9126	18.2296	15.1409	23.4897	17.1251	17.7555	13.7372	15.2723	12.3248	18.1585	21.0416	16.5255	18.2612	20.2942	NA	NA	18.2543	17.3073	NA	16.5953	17.062	16.1399	17.327
P08670	18.1569	NA	NA	19.6882	NA	NA	NA	NA	17.1851	18.0902	NA	NA	NA	NA	NA	NA	15.7294	NA	NA	NA	NA	NA	17.7669	17.735	NA	NA	NA	NA	17.63	NA	18.3487	18.2872	NA	17.9768	NA	NA	NA	NA	NA	NA	18.8192	17.4258	NA	15.9901	17.1104	NA	NA
P08842	NA	NA	NA	NA	NA	NA	NA	NA	NA	NA	NA	NA	NA	NA	NA	NA	NA	NA	NA	NA	NA	NA	NA	NA	NA	NA	NA	NA	NA	NA	18.4874	18.9349	NA	NA	NA	NA	NA	NA	NA	NA	NA	NA	NA	NA	NA	NA	NA
P08913	NA	18.397	NA	NA	NA	NA	NA	NA	NA	NA	NA	NA	NA	NA	NA	NA	NA	NA	NA	NA	NA	NA	NA	NA	NA	NA	NA	NA	NA	NA	NA	NA	NA	NA	NA	NA	NA	NA	NA	NA	NA	NA	NA	NA	NA	NA	NA
P08962	14.2605	17.587	20.9625	NA	14.7358	12.8483	22.5951	21.5546	17.1725	20.7847	16.5406	15.2945	16.3669	17.8647	NA	15.7228	16.7451	15.2079	21.4844	21.612	NA	15.8986	17.3431	12.6465	16.5301	23.7494	14.2691	19.3288	21.8234	21.4101	17.7355	19.5613	NA	19.6078	22.1191	16.542	NA	22.293	21.0707	20.8384	20.6642	14.815	21.3373	17.2292	19.2354	12.8061	16.6073
P09110	NA	NA	NA	NA	NA	NA	20.5592	NA	NA	NA	NA	NA	NA	NA	NA	NA	NA	NA	NA	NA	NA	NA	NA	NA	NA	NA	NA	NA	NA	NA	NA	NA	NA	NA	NA	NA	NA	NA	NA	NA	NA	NA	NA	NA	NA	NA	NA
P09172	NA	NA	NA	NA	NA	NA	NA	NA	NA	NA	NA	NA	NA	19.3159	NA	NA	NA	NA	NA	NA	NA	NA	NA	NA	NA	NA	NA	NA	NA	NA	NA	NA	NA	NA	NA	NA	NA	NA	NA	NA	NA	NA	NA	NA	NA	NA	NA
P09326	15.4195	NA	16.466	NA	NA	18.8916	NA	15.0088	NA	NA	NA	NA	16.9047	NA	14.4758	NA	NA	19.3343	NA	NA	NA	18.9288	14.8727	NA	NA	NA	13.3496	18.9811	16.0984	NA	NA	NA	NA	NA	NA	NA	NA	NA	18.4421	19.4945	NA	NA	19.0065	NA	NA	NA	NA
P09564	NA	NA	NA	NA	NA	17.7009	NA	NA	NA	NA	NA	13.0343	NA	NA	20.8248	NA	NA	NA	NA	NA	NA	19.2725	NA	NA	NA	NA	NA	18.0468	13.4456	NA	NA	14.2679	NA	NA	NA	NA	NA	NA	NA	NA	NA	NA	NA	NA	NA	NA	NA
P09603	17.2648	NA	NA	NA	NA	NA	15.6229	NA	15.9768	NA	16.9335	NA	NA	NA	NA	17.2728	17.7244	16.5806	17.205	NA	NA	NA	NA	NA	NA	16.2041	NA	NA	NA	NA	NA	NA	NA	NA	15.4279	NA	NA	20.1071	NA	NA	17.7899	14.9441	NA	NA	18.2247	NA	19.2551
P09619	NA	NA	17.6826	NA	NA	NA	18.9423	NA	NA	NA	NA	NA	NA	NA	NA	NA	NA	NA	18.6856	16.3636	NA	NA	NA	NA	NA	17.9284	NA	NA	NA	14.6075	NA	NA	NA	NA	NA	NA	NA	NA	NA	NA	18.931	NA	NA	18.8121	NA	NA	NA
P09693	NA	NA	NA	NA	NA	NA	NA	NA	NA	NA	NA	NA	NA	NA	17.701	NA	NA	NA	NA	NA	NA	NA	NA	NA	NA	NA	NA	NA	NA	NA	NA	NA	NA	NA	NA	NA	NA	NA	NA	NA	NA	NA	NA	NA	NA	NA	NA
P09758	19.1118	NA	NA	NA	20.3426	NA	NA	NA	NA	NA	NA	NA	NA	NA	NA	NA	NA	NA	NA	NA	NA	NA	NA	NA	NA	NA	NA	NA	19.5886	NA	NA	NA	NA	NA	NA	NA	NA	NA	NA	NA	NA	NA	NA	NA	NA	NA	NA
P0C0L4	NA	NA	NA	18.487	NA	NA	NA	NA	NA	NA	NA	NA	NA	NA	NA	12.5508	NA	NA	NA	NA	NA	NA	12.9599	NA	NA	NA	NA	14.4262	NA	NA	NA	NA	NA	NA	NA	19.2892	NA	NA	NA	NA	NA	NA	NA	13.0442	NA	12.5251	NA
P0C7U0	16.342	NA	NA	NA	NA	NA	17.4376	NA	NA	NA	NA	NA	NA	16.7342	NA	17.7205	19.0867	18.1876	NA	NA	NA	NA	NA	NA	NA	NA	NA	NA	NA	NA	NA	NA	NA	NA	NA	NA	NA	NA	NA	NA	NA	NA	NA	20.0369	NA	NA	15.5571
P10253	NA	NA	NA	NA	NA	14.6297	NA	NA	NA	NA	16.7815	NA	NA	16.5691	NA	NA	NA	NA	NA	NA	NA	NA	NA	NA	16.7648	NA	NA	NA	NA	NA	19.6648	17.9028	NA	18.8978	NA	NA	NA	19.9321	NA	NA	15.5919	NA	NA	18.0294	NA	NA	NA
P10314	15.6781	NA	NA	NA	NA	NA	NA	NA	NA	NA	NA	NA	NA	NA	NA	NA	NA	NA	NA	NA	NA	NA	NA	NA	NA	NA	NA	NA	NA	NA	NA	NA	NA	NA	NA	NA	NA	NA	NA	NA	NA	NA	NA	20.7339	NA	NA	17.3032
P10321	16.953	17.3747	NA	NA	NA	17.6925	NA	NA	NA	20.6378	NA	NA	NA	NA	NA	NA	NA	NA	NA	NA	NA	17.308	NA	NA	NA	NA	NA	13.9981	NA	NA	NA	NA	NA	NA	NA	NA	NA	NA	NA	NA	15.6014	NA	17.8347	NA	NA	NA	NA
P10586	17.0433	NA	14.0111	NA	17.436	NA	11.8016	NA	16.0237	14.4216	17.4026	18.2431	NA	17.2792	16.7599	NA	14.7194	NA	18.3505	17.6096	18.2463	NA	NA	15.4658	16.3941	NA	NA	NA	17.0275	17.1465	15.1308	14.6444	NA	NA	16.0851	NA	17.3969	14.0923	NA	NA	15.4913	15.3879	NA	NA	15.055	18.0799	17.897
P10619	NA	NA	NA	NA	NA	NA	NA	NA	NA	NA	NA	NA	NA	NA	NA	NA	NA	NA	NA	NA	NA	NA	NA	NA	NA	NA	NA	NA	NA	NA	17.6602	19.2651	NA	17.4383	NA	NA	NA	NA	NA	NA	NA	NA	NA	16.4439	NA	NA	NA
P10645	NA	NA	NA	NA	NA	NA	NA	NA	NA	NA	NA	NA	NA	18.1996	NA	NA	NA	NA	NA	NA	NA	NA	NA	NA	NA	NA	NA	NA	NA	NA	NA	NA	NA	NA	NA	NA	NA	NA	NA	NA	NA	NA	NA	NA	NA	NA	NA
P10646	15.4856	NA	NA	NA	17.4349	NA	17.6095	NA	NA	NA	NA	15.3338	NA	NA	NA	NA	NA	NA	19.6273	20.2738	16.3226	NA	NA	NA	NA	16.6171	NA	NA	19.8367	18.0864	17.0681	14.8883	NA	NA	19.1473	16.2953	18.0024	17.5013	NA	NA	19.2815	15.3407	NA	NA	17.2539	NA	20.1791
P10721	NA	NA	NA	NA	NA	NA	NA	NA	NA	NA	NA	NA	NA	NA	NA	NA	NA	NA	NA	NA	NA	NA	NA	NA	16.2966	NA	NA	NA	NA	NA	NA	NA	NA	NA	NA	NA	NA	NA	NA	NA	NA	NA	NA	NA	NA	NA	NA
P10747	18.7596	NA	NA	NA	NA	22.9391	15.1922	NA	NA	NA	NA	NA	NA	NA	17.2275	NA	NA	NA	NA	NA	NA	21.8599	NA	NA	NA	NA	NA	NA	NA	NA	NA	NA	NA	NA	NA	NA	NA	NA	NA	NA	NA	NA	NA	NA	NA	NA	NA
P10809	17.3831	NA	NA	NA	NA	NA	NA	NA	NA	NA	17.1046	NA	NA	NA	NA	21.0074	NA	NA	16.9346	17.9884	NA	NA	NA	17.2089	NA	NA	NA	NA	19.3262	NA	19.3083	18.3062	NA	17.3831	NA	NA	NA	NA	17.4169	NA	18.874	NA	NA	NA	16.2662	NA	NA
P10909	NA	16.875	NA	18.7936	15.0142	15.4856	16.3818	10.3105	NA	17.2859	16.0449	16.3959	NA	18.475	NA	13.9912	15.0362	15.9786	14.8178	14.8683	NA	18.8685	13.7313	NA	16.0216	NA	12.2439	14.2879	17.594	NA	17.1153	NA	NA	NA	NA	NA	13.709	14.6312	12.6412	11.2753	18.5777	15.5564	11.7233	17.4926	16.0827	NA	15.6984
P11047	14.1777	17.5817	NA	19.4695	16.7404	NA	16.5771	16.2466	16.0474	NA	16.8136	15.2331	NA	16.9408	NA	NA	NA	NA	17.1494	17.1945	18.1295	NA	NA	14.2056	15.9009	NA	NA	NA	15.7679	13.9962	20.0727	19.9253	NA	16.5818	15.966	16.7914	18.8055	15.3528	NA	NA	16.8399	16.4186	NA	16.97	18.486	NA	16.2555
P11049	NA	NA	14.2376	NA	NA	16.6018	NA	19.5689	NA	14.852	NA	NA	14.3875	NA	NA	NA	NA	14.0941	NA	NA	NA	15.3197	15.933	NA	NA	NA	NA	18.3195	16.552	NA	NA	NA	NA	NA	NA	NA	NA	NA	13.7862	19.5677	NA	NA	18.7469	NA	NA	NA	NA
P11117	NA	14.8888	NA	NA	NA	NA	NA	NA	NA	18.385	17.0016	17.8709	NA	16.0647	NA	13.7486	12.8683	16.0748	17.4948	18.8481	NA	NA	13.295	NA	19.2153	NA	19.6287	NA	NA	NA	18.4944	18.3708	NA	18.2388	NA	NA	NA	NA	NA	NA	19.0096	19.1796	NA	17.4435	16.8939	NA	13.0071
P11142	19.0082	NA	NA	14.6691	NA	17.2803	NA	NA	NA	NA	15.0203	NA	NA	NA	NA	17.2792	NA	16.305	17.0104	18.2052	NA	NA	NA	NA	NA	NA	NA	15.7759	16.3972	NA	16.6441	17.0677	NA	NA	NA	NA	18.6379	NA	16.5347	NA	17.3121	17.77	NA	NA	17.6672	NA	NA
P11166	16.9131	12.8484	16.5548	NA	14.2813	16.9028	17.0888	13.609	NA	16.1324	17.2024	16.7228	19.1144	16.5505	18.6791	16.92	16.832	18.9231	20.7369	20.58	17.022	19.484	18.0295	14.8229	16.8142	14.5408	16.6508	12.8106	17.5975	15.6529	16.103	17.2601	NA	16.7416	15.7535	NA	13.6964	NA	18.1035	16.9068	20.6669	18.4551	17.7689	19.8536	16.9127	20.4032	12.9168
P11215	NA	14.7528	13.9196	NA	NA	14.1524	NA	NA	NA	11.9287	NA	NA	16.4129	NA	NA	NA	NA	NA	NA	NA	NA	NA	NA	NA	NA	NA	13.9323	19.6351	NA	NA	NA	NA	NA	NA	NA	NA	NA	NA	NA	NA	NA	NA	NA	NA	NA	NA	NA
P11279	17.6589	18.2565	17.7333	NA	NA	21.4962	18.2675	13.9517	15.4957	14.4177	19.3397	20.1742	12.4618	16.0801	18.4071	13.4304	15.6646	17.6153	15.8771	18.0111	NA	19.0885	17.843	19.3473	18.6459	NA	16.2429	16.9328	NA	16.3061	17.6686	18.3743	NA	20.0024	19.3019	15.1355	NA	NA	17.2768	15.9049	13.917	17.2402	16.3192	18.29	21.2593	22.7633	18.6528
P11362	15.5965	NA	16.962	NA	NA	NA	17.2505	NA	NA	16.5932	18.9113	NA	NA	NA	NA	16.8247	21.6415	17.5772	17.2087	NA	NA	NA	NA	NA	NA	NA	16.8811	NA	NA	NA	NA	NA	NA	NA	NA	NA	NA	17.3275	16.92	17.0983	15.3324	NA	18.6444	NA	NA	NA	17.2454
P11678	NA	19.5285	NA	NA	NA	NA	NA	NA	NA	NA	NA	NA	17.5945	NA	NA	NA	NA	NA	NA	NA	NA	NA	NA	NA	NA	NA	18.6891	NA	NA	NA	NA	NA	NA	NA	NA	NA	NA	NA	NA	NA	NA	NA	NA	NA	NA	NA	NA
[truncated: 1,129 more rows]

## Sheet: Table_F
Protein	159_2_EB	159_2_ES	159_2_NP	2D4_iPS	Adipocytes	Astroglia	BMd_Macrophages	C2C12	D3	E14Tg2a	GL261	J1_EB_barde	J1_neurons_barde	J1_NP	J774.2	Min6	MSC80	NeuralASC_spinalcord	NeuralASC_svz	NeuralES	R1_definitiveNCS_dvk	R1_EB_barde	R1_ES	R1_NPh_barde	R1_primitiveNCS_dvk	SMA560	spleenocytes	TH0cells	TH17cells	TH1cells	TTF_1-iPS
[truncated: 1,258 more rows]
