# Supplementary material for: A Mass Spectrometric-Derived Cell Surface Protein Atlas
Source: PLoS One. 2015 Apr 20;10(4):e0121314. doi: 10.1371/journal.pone.0121314 (PMC4404347; doi:10.1371/journal.pone.0121314)
Supplement: S1 Table — Description and origin of all cell types and tissues used for the CSPA. (XLS) [file pone.0121314.s001.xls]

## Sheet: Sheet1
cell line	organisme	reference	published CSC data	description	origin	cell line / primary	original cell line	germ layer origin
159-2 EB	Mouse	Schrenk-Siemens, K., Stem Cells. 2008 Aug;26(8):2153-63	Wollscheid, 2009, Nat Biotech	embryonic body	Embryonal stem cell	line	159-2	Mesoderm Ectoderm Endoderm
159-2 ES	Mouse	Schrenk-Siemens, K., Stem Cells. 2008 Aug;26(8):2153-64	Wollscheid, 2009, Nat Biotech	unidfferentiated	Embryonal stem cell	line	159-2	Mesoderm Ectoderm Endoderm
159-2 NP	Mouse	Schrenk-Siemens, K., Stem Cells. 2008 Aug;26(8):2153-65	Wollscheid, 2009, Nat Biotech	neural progenitor	Embryonal stem cell	line	159-2	Ectoderm
2D4-iPS	Mouse	TIB-185		induce pluripotent stem cell	B lymphocyte	line	2D4	Mesoderm Ectoderm Endoderm
786-O	Human	ATCC: CRL-1932™	Boysen, 2012, Neoplasia	renal cell adenocarcinoma		line		Endoderm
A-431	Human	ATCC: CRL-1555™	Stergiou, 2013, Plos One	epithelial carcinoma		line		Endoderm
Adipocytes human	Human	primary	Moest, 2013, Biochim Biophys Acta	primary (liposucksion)		primary		Mesoderm
Adipocytes mouse	Mouse	primary	Moest, 2013, Biochim Biophys Acta	primary		primary		Mesoderm
Astroglia	Mouse	primary		embryonal	Astroglia	primary	primary	Ectoderm
B-ALL	Human	primary, expanded in mice	Mirkowska, 2013, Blood	primary, expanded in SCID mice	B cell acute lymphoblastic leukemia	primary		Mesoderm
Braintumor	Human	primary				primary		Ectoderm
C2C12	Mouse	ATCC: CRL-1772	Gundry, 2009, Mol Cell Proteomics	Myocardic progenitor	Myocardic progenitor	line	C2C12	Mesoderm
CaLu-3	Human	ATCC: HTB-55™	Ziegler, 2011, Lung Cancer	adenocarcinoma, epithelial	pleural effusion	line		Endoderm
CD4+, CD25- Tcells	Human	primary		primary		primary		Mesoderm
D3_ES	Mouse	CRL-11632		pluripotent emryonic stem cell	129S2/SvPas	line		Mesoderm Ectoderm Endoderm
E14Tg2a	Mouse	Smith, 1991, J. Tiss. Cult. Meth		unidfferentiated	Embryonal stem cell	line	E14Tg2a	Mesoderm Endoderm Ectoderm
GL261	Mouse	Akbasak, A. J Neurosurg. 1992 Jun;76(6):1048-50.		differentiated	Glioblastoma	line	GL261	Ectoderm
Glioblastoma exvivo	Human	primary, exvivo	Bock, 2012, J Proteome res	primary, expanded exvivo		primary		Ectoderm
HBL-1	Human	Gaidano G. et al, Leukemia. 1993 Oct;7(10):1621-9		mature B-cell lymphoma	pleural effusion	line		Mesoderm
HCC4012	Human	Cerciello, 2013, Clin Proteomics	Cerciello, 2013, Clin Proteomics	pleural mesothelium		line		Mesoderm
HDLM-2	Human	Drexler, Hum Cell. 1992 Mar;5(1):42-53		hodgkin lymphoma	pleural effusion	line		Mesoderm
HEK	Human	ATCC: CRL-1573		embryonic kidney	adenovirus transfected, fetus	line		Mesoderm
HeLa	Human	ATCC: CCL-2™		cervical cancer	biopsie	line		Mesoderm
HL-60	Human	ATCC: CCL-240™	Hofmann, 2010, Blood	promyelocytic leukemia		line		Mesoderm
hMSC	Human	primary, expaned in mouse?		mesenchymal stromal cells		line		Mesoderm
IMR-32	Human	ATCC: CCL-127™		neuroblast / fibroblast	neuroblastoma, 13month	line		Ectoderm
J1_EB	Mouse	PubMed: 1606615		embryonic body	Embryonal stem cell	line	J1	Mesoderm Ectoderm Endoderm
J1_neurons	Mouse	PubMed: 1606616		neurons	Embryonal stem cell	line	J1	Ectoderm
J1_NP	Mouse	PubMed: 1606617		neural precursors	Embryonal stem cell	line	J1	Ectoderm
J774.2	Mouse	Sigma: 85011428		differentiated	Macrophages	line	J774.2	Mesoderm
Jurkat (clone E6-1)	Human	ATCC: TIB-152™	Wollscheid, 2009, Nat Biotech	T lymphocyte	acute T-cell leukemia	line		Mesoderm
KM-H2	Human	Drexler, Hum Cell. 1992 Mar;5(1):42-53		hodgkin lymphoma, malignant neoplastic cells	Hodgkin and Reed-Sternberg (H-RS)	line		Mesoderm
L-428	Human	Drexler, Hum Cell. 1992 Mar;5(1):42-53		hodgkin lymphoma	pleural effusion	line		Mesoderm
L-540	Human	Drexler, Hum Cell. 1992 Mar;5(1):42-53		hodgkin lymphoma	bone marrow	line		Mesoderm
LN-18	Human	ATCC: CRL-2610™	Bock, 2012, J Proteome res	malignant glioma (grade IV)		line		Mesoderm
LN-229	Human	ATCC: CRL-2611™	Bock, 2012, J Proteome res	glioblastoma	PubMed. 10416987	line		Ectoderm
LNT-229	Human	Friese MA. et al, Cancer Research 64, 7596-7603, October 15, 2004	Bock, 2012, J Proteome res			line		Ectoderm
Lymphoma	Human	primary		primary		primary		Mesoderm
Macrophages (BM-der.)	Mouse	primary		differentiated	Macrophages	primary	primary	Mesoderm
MedB-1	Human	Möller P. et al., Int J Cancer. 2001 May 1;92(3):348-53		diffuse large B-cell lymphoma		line		Mesoderm
Melanoma Adh	Human	primary, expanded in mice		differentiated melanoma culture	biopsies	primary		Ectoderm
Melanoma NSph	Human	primary, expanded in mice		spheroid melanoma culture	biopsies	primary		Ectoderm
Min6	Mouse	Miyazaki, J., Endocrinology 127 (1990)	Danzer, 2012, J Proteome res	differentiated	beta-cells (pancreas)	line	Min6	Endoderm
MSC80	Mouse	Boutry, J.M., . Neurosci. Res. 32 (1) (1992)	Sidiropoulos, 2012, Brain	differentiated	Schwanncells	line	MSC80	Mesoderm
NB4	Human	Lanotte M. et al, Blood. 1991 Mar 1;77(5):1080-6	Hofmann, 2010, Blood	acute promyelocytic leukemia		line		Mesoderm
Neural stem cells (forebrain)	Mouse	primary, expanded in cell culture		E10, forebrain	Embryonal neural stem cells	primary	primary	Mesoderm
Neural stem cells (spinal cord)	Mouse	primary		spinal cord	Adult neural stem cells	primary	primary	Mesoderm
Neural stem cells (SVZ)	Mouse	primary		brain, subventricular zone	Adult neural stem cells	primary	primary	Mesoderm
NK cells	Human	primary		primary natural killer Tcells		primary		Mesoderm
P493-6	Human	Pajic A. et al, Int J Cancer. 2000 Sep 15;87(6):787-93		lymphoblastoid cell line EREB2-5 transfected with pmyc (EbbsteinBarr virus)		line		Mesoderm
PASMC	Human	Lonza: CC-2581		pulmonary artery smooth muscle cells		line		Mesoderm
R1_defNCS 2°	Mouse	Nagy, 1991, PNAS	Deveale, 2013, Stem Cells	definitive neural stem cells	Embryonal stem cell	line	R1	Mesoderm
R1_EB	Mouse	Nagy, 1991, PNAS	Deveale, 2013, Stem Cells	embryonic body	Embryonal stem cell	line	R1	Mesoderm Ectoderm Endoderm
R1_ES	Mouse	Nagy, 1991, PNAS	Deveale, 2013, Stem Cells	undifferentiated	Embryonal stem cell	line	R1	Mesoderm Ectoderm Endoderm
R1_NP_4h	Mouse	Nagy, 1991, PNAS	Deveale, 2013, Stem Cells	4h old neural progenitor	Embryonal stem cell	line	R1	Mesoderm
R1_primNCS 1°	Mouse	Nagy, 1991, PNAS	Deveale, 2013, Stem Cells	primitive neural stem cells	Embryonal stem cell	line	R1	Mesoderm
RD	Human	ATCC: CCL-136™		embryonal rhabdomyosarcoma		line		Mesoderm
Rh28	Human	Shapiro DN. et al, Cancer Res 50, 6002-6009, Sep 15, 1990		alveolar rhabdomyosarcoma	alveolar rhabdomyosarcoma	line		Mesoderm
RH4	Human	Fletcher JM. et al., Cloning Stem Cells. 2006 Winter;8(4):319-34		alveolar rhabdomyosarcoma		line		Mesoderm
Ruch-2	Human	Scholl FA. et al, Br J Cancer. 2000 Mar;82(6):1239-45		embryonal rhabdomyosarcoma	primary botryoid rhabdomyosarcoma	line		Mesoderm
SDM104	Human	Cerciello, 2013, Clin Proteomics	Cerciello, 2013, Clin Proteomics	primary	pleural mesothelium	line		Mesoderm
SDM34	Human	Thurneysen c. et al, 2009 May;64(2):140-7	Cerciello, 2013, Clin Proteomics	primary	biphasic malignant pleural mesothelioma	line		Mesoderm
SDM4	Human	Belyanskaya LL. et al, Mol Cancer. 2007 Oct 22;6:66	Cerciello, 2013, Clin Proteomics	primary	biphasic malignant pleural mesothelioma	line		Mesoderm
SDM5	Human	Thurneysen c. et al, 2009 May;64(2):140-7	Cerciello, 2013, Clin Proteomics	primary	epithelial malignant pleural mesothelioma	line		Mesoderm
SMA560	Mouse					line		Mesoderm
Spleenocytes	Mouse	primary	Wollscheid, 2009, Nat Biotech	differentiated	Spleenocytes, heterogeneous	primary	primary	Mesoderm
SU-DHL-6	Human	ATCC: CRL-2959™		B lymphocyte	large B cell lymphoma	line		Mesoderm
SU4 (SU-DHL-4)	Human	Burkhead DL. et al, Proc. Am. Assoc. Cancer Baa. 30. 2141, 1990		B lymphocyte	diffuse large B cell lymphoma	line		Mesoderm
T98G	Human	ATCC: CRL-1690™	Bock, 2012, J Proteome res	multiforme glioblastoma		line		Ectoderm
TH-0	Mouse	primary		differentiated	T Helper cells, type 0	primary	primary	Mesoderm
TH-1	Mouse	primary		differentiated	T Helper cells, type 1	primary	primary	Mesoderm
TH-17	Mouse	primary		differentiated	T Helper cells, type 17	primary	primary	Mesoderm
TTF-1_iPS	Mouse			mouse iPS cell line	TTF-1	line	TTF-1	Endoderm Ectoderm Mesoderm
U-2 OS	Human	ATCC: HTB-96™		osteosarcoma		line		Mesoderm
U-251 MG	Human	JCRB: IFO50285		glioblastoma, astrocytoma, epithelial morphology		line		Ectoderm
U-87 MG	Human	ATCC: HTB-14™		glioblastoma, astocytoma (grade IV)	biopsy	line		Ectoderm
U2932	Human	Amini RM. et al, Leuk Lymphoma. 2002 Nov;43(11):2179-89		B lymphocyte	diffuse large B cell lymphoma	line		Mesoderm
ZL55 MPM	Human	Schmitter D. et al, Int J Cancer 51, 290-301 (1992)	Cerciello, 2013, Clin Proteomics	epithelial malignant pleural mesothelioma		line		Mesoderm
								tot
								1
								2
								3
								4
