# Supplementary material for: A Mass Spectrometric-Derived Cell Surface Protein Atlas
Source: PLoS One. 2015 Apr 20;10(4):e0121314. doi: 10.1371/journal.pone.0121314 (PMC4404347; doi:10.1371/journal.pone.0121314)
Supplement: S2 File — Excel file containing all human and mouse surfaceome proteins in two tables and an additional table with all identified N-glycopeptides. A. List of 1492 human surfaceome proteins and their annotation. B. List of 1296 mouse surfaceome proteins and their annotation. C. List of 13942 mouse and human derived N-glycopeptides, including identified modified form. (XLSX) [file pone.0121314.s003.xlsx]

## Sheet: Table A
organism	ID_link	CSPA category	UP_Protein_name	UP_entry_name	CD	ENTREZ_gene_ID	ENTREZ gene symbol	protein probability	count detection in different cell types	Phobius TM predicted yes/no	# predicted TM domains	GPI	UniProt Cell surface
Human	P08473	1 - high confidence	Neprilysin	NEP_HUMAN	CD10	4311	MME	1	29	1	1	0	yes
Human	Q92854	1 - high confidence	Semaphorin-4D	SEM4D_HUMAN	CD100	10507	SEMA4D	1	26	1	1	0	yes
Human	Q93033	1 - high confidence	Immunoglobulin superfamily member 2	IGSF2_HUMAN	CD101	9398	CD101	1	6	1	1	0	yes
Human	P13598	1 - high confidence	Intercellular adhesion molecule 2	ICAM2_HUMAN	CD102	3384	ICAM2	1	23	1	1	0	yes
Human	P38570	1 - high confidence	Integrin alpha-E	ITAE_HUMAN	CD103	3682	ITGAE	0.9934	1	1	1	0	yes
Human	P16144	1 - high confidence	Integrin beta-4	ITB4_HUMAN	CD104	3691	ITGB4	1	5	1	1	0	yes
Human	P17813	1 - high confidence	Endoglin	EGLN_HUMAN	CD105	2022	ENG	1	8	1	1	0	yes
Human	P19320	1 - high confidence	Vascular cell adhesion protein 1	VCAM1_HUMAN	CD106	7412	VCAM1	1	10	1	1	0	yes
Human	P11279	1 - high confidence	Lysosome-associated membrane glycoprotein 1	LAMP1_HUMAN	CD107a	3916	LAMP1	1	38	1	1	0	yes
Human	P13473	1 - high confidence	Lysosome-associated membrane glycoprotein 2	LAMP2_HUMAN	CD107b	3920	LAMP2	1	35	1	1	0	yes
Human	O75326	1 - high confidence	Semaphorin-7A	SEM7A_HUMAN	CD108	8482	SEMA7A	1	21	1	1	1	yes
Human	Q6YHK3	1 - high confidence	CD109 antigen	CD109_HUMAN	CD109	135228	CD109	1	37	0	0	1	yes
Human	Q15223	1 - high confidence	Poliovirus receptor-related protein 1	PVRL1_HUMAN	CD111	5818	PVRL1	1	38	1	1	0	yes
Human	Q92692	1 - high confidence	Poliovirus receptor-related protein 2	PVRL2_HUMAN	CD112	5819	PVRL2	0.989	8	1	1	0	yes
Human	Q9NQS3	1 - high confidence	Poliovirus receptor-related protein 3	PVRL3_HUMAN	CD113	25945	PVRL3	1	19	1	2	0	yes
Human	P15509	1 - high confidence	Granulocyte-macrophage colony-stimulating factor receptor subunit alpha	CSF2R_HUMAN	CD116	1438	CSF2RA	1	4	1	1	0	yes
Human	P10721	1 - high confidence	Mast/stem cell growth factor receptor	KIT_HUMAN	CD117	3815	KIT	0.9952	1	1	1	0	yes
Human	P42702	1 - high confidence	Leukemia inhibitory factor receptor	LIFR_HUMAN	CD118	3977	LIFR	1	10	1	1	0	yes
Human	P15260	1 - high confidence	Interferon gamma receptor 1	INGR1_HUMAN	CD119	3459	IFNGR1	1	30	1	1	0	yes
Human	P20701	1 - high confidence	Integrin alpha-L	ITAL_HUMAN	CD11a	3683	ITGAL	1	8	1	1	0	yes
Human	P11215	1 - high confidence	Integrin alpha-M	ITAM_HUMAN	CD11b	3684	ITGAM	1	6	1	1	0	yes
Human	P20702	1 - high confidence	Integrin alpha-X	ITAX_HUMAN	CD11c	3687	ITGAX	1	6	1	1	0	yes
Human	P19438	1 - high confidence	Tumor necrosis factor receptor superfamily member 1A	TNR1A_HUMAN	CD120a	7132	TNFRSF1A	1	2	1	1	0	yes
Human	P14778	1 - high confidence	Interleukin-1 receptor type 1	IL1R1_HUMAN	CD121a	3554	IL1R1	0.9933	4	1	1	0	yes
Human	P27930	1 - high confidence	Interleukin-1 receptor type 2	IL1R2_HUMAN	CD121b	7850	IL1R2	1	8	1	1	0	yes
Human	P14784	1 - high confidence	Interleukin-2 receptor subunit beta	IL2RB_HUMAN	CD122	3560	IL2RB	0.9885	2	1	1	0	yes
Human	P26951	1 - high confidence	Interleukin-3 receptor subunit alpha	IL3RA_HUMAN	CD123	3563	IL3RA	1	5	1	1	0	yes
Human	P24394	1 - high confidence	Interleukin-4 receptor subunit alpha	IL4RA_HUMAN	CD124	3566	IL4R	1	7	1	1	0	yes
Human	Q01344	1 - high confidence	Interleukin-5 receptor subunit alpha	IL5RA_HUMAN	CD125	3568	IL5RA	0.9913	1	1	1	0	yes
Human	P16871	1 - high confidence	Interleukin-7 receptor subunit alpha	IL7RA_HUMAN	CD127	3575	IL7R	1	8	1	1	0	yes
Human	P15144	1 - high confidence	Aminopeptidase N	AMPN_HUMAN	CD13	290	ANPEP	1	20	1	1	0	yes
Human	P40189	1 - high confidence	Interleukin-6 receptor subunit beta	IL6RB_HUMAN	CD130	3572	IL6ST	1	28	1	1	0	yes
Human	P32927	1 - high confidence	Cytokine receptor common subunit beta	IL3RB_HUMAN	CD131	1439	CSF2RB	1	3	1	1	0	yes
Human	P31785	1 - high confidence	Cytokine receptor common subunit gamma	IL2RG_HUMAN	CD132	3561	IL2RG	1	14	1	1	0	yes
Human	O43490	1 - high confidence	Prominin-1	PROM1_HUMAN	CD133	8842	PROM1	1	6	1	5	0	yes
Human	P36888	1 - high confidence	FL cytokine receptor	FLT3_HUMAN	CD135	2322	FLT3	1	1	1	2	0	yes
Human	Q04912	1 - high confidence	Macrophage-stimulating protein receptor	RON_HUMAN	CD136	4486	MST1R	1	14	1	1	0	yes
Human	Q07011	1 - high confidence	Tumor necrosis factor receptor superfamily member 9	TNR9_HUMAN	CD137	3604	TNFRSF9	1	2	1	1	0	yes
Human	P08571	1 - high confidence	Monocyte differentiation antigen CD14	CD14_HUMAN	CD14	929	CD14	1	2	0	0	1	yes
Human	P16234	1 - high confidence	Alpha-type platelet-derived growth factor receptor	PGFRA_HUMAN	CD140a	5156	PDGFRA	1	8	1	1	0	yes
Human	P09619	1 - high confidence	Beta-type platelet-derived growth factor receptor	PGFRB_HUMAN	CD140b	5159	PDGFRB	1	8	1	1	0	yes
Human	P07204	1 - high confidence	Thrombomodulin	TRBM_HUMAN	CD141	7056	THBD	0.9859	6	1	1	0	yes
Human	P13726	1 - high confidence	Tissue factor	TF_HUMAN	CD142	2152	F3	1	29	1	1	0	yes
Human	P12821	1 - high confidence	Angiotensin-converting enzyme	ACE_HUMAN	CD143	1636	ACE	1	10	1	1	0	yes
Human	P33151	1 - high confidence	Cadherin-5	CADH5_HUMAN	CD144	1003	CDH5	1	4	1	1	0	yes
Human	P43121	1 - high confidence	Cell surface glycoprotein MUC18	MUC18_HUMAN	CD146	4162	MCAM	1	26	1	1	0	yes
Human	P35613	1 - high confidence	Basigin	BASI_HUMAN	CD147	682	BSG	1	47	1	1	0	yes
Human	Q12913	1 - high confidence	Receptor-type tyrosine-protein phosphatase eta	PTPRJ_HUMAN	CD148	5795	PTPRJ	1	40	1	1	0	yes
Human	Q13291	1 - high confidence	Signaling lymphocytic activation molecule	SLAF1_HUMAN	CD150	6504	SLAMF1	1	12	1	1	0	yes
Human	P48509	2 - putative	CD151 antigen	CD151_HUMAN	CD151	977	CD151	1	24	1	4	0	#N/A
Human	P29965	1 - high confidence	CD40 ligand	CD40L_HUMAN	CD154	959	CD40LG	1	2	1	1	0	yes
Human	P15151	1 - high confidence	Poliovirus receptor	PVR_HUMAN	CD155	5817	PVR	1	27	1	1	0	yes
Human	P78325	1 - high confidence	Disintegrin and metalloproteinase domain-containing protein 8	ADAM8_HUMAN	CD156a	101	ADAM8	1	3	1	1	0	yes
Human	P78536	1 - high confidence	Disintegrin and metalloproteinase domain-containing protein 17	ADA17_HUMAN	CD156b	6868	ADAM17	1	27	1	1	0	yes
Human	O14672	1 - high confidence	Disintegrin and metalloproteinase domain-containing protein 10	ADA10_HUMAN	CD156c	102	ADAM10	1	42	1	1	0	yes
Human	Q10588	1 - high confidence	ADP-ribosyl cyclase 2	BST1_HUMAN	CD157	683	BST1	1	4	0	0	1	yes
Human	P43628	1 - high confidence	Killer cell immunoglobulin-like receptor 2DL3	KI2L3_HUMAN	CD158b2	3804	KIR2DL3	1	1	1	1	0	yes
Human	P43629	1 - high confidence	Killer cell immunoglobulin-like receptor 3DL1	KI3L1_HUMAN	CD158e	3811	KIR3DL1	0.9999	1	1	1	0	yes
Human	Q8N109	1 - high confidence	Killer cell immunoglobulin-like receptor 2DL5A	KI2LA_HUMAN	CD158f1	57292	KIR2DL5A	0.9988	1	1	1	0	yes
Human	Q14954	1 - high confidence	Killer cell immunoglobulin-like receptor 2DS1	KI2S1_HUMAN	CD158h	3806	KIR2DS1	1	1	1	1	0	yes
Human	P43632	1 - high confidence	Killer cell immunoglobulin-like receptor 2DS4	KI2S4_HUMAN	CD158i	3809	KIR2DS4	1	1	1	1	0	yes
Human	P26715	2 - putative	NKG2-A/NKG2-B type II integral membrane protein	NKG2A_HUMAN	CD159a	3821	KLRC1	1	1	1	1	0	#N/A
Human	O95971	1 - high confidence	CD160 antigen	BY55_HUMAN	CD160	11126	CD160	1	2	0	0	1	yes
Human	Q12918	2 - putative	Killer cell lectin-like receptor subfamily B member 1	KLRB1_HUMAN	CD161	3820	KLRB1	1	1	1	1	0	#N/A
Human	Q14242	1 - high confidence	P-selectin glycoprotein ligand 1	SELPL_HUMAN	CD162	6404	SELPLG	1	4	1	1	0	yes
Human	Q86VB7	1 - high confidence	Scavenger receptor cysteine-rich type 1 protein M130	C163A_HUMAN	CD163	9332	CD163	1	1	1	2	0	yes
Human	Q04900	1 - high confidence	Sialomucin core protein 24	MUC24_HUMAN	CD164	8763	CD164	0.9957	4	1	1	0	yes
Human	Q13740	1 - high confidence	CD166 antigen	CD166_HUMAN	CD166	214	ALCAM	1	41	1	1	0	yes
Human	Q16832	1 - high confidence	Discoidin domain-containing receptor 2	DDR2_HUMAN	CD167b	4921	DDR2	0.9992	8	1	1	0	yes
Human	Q9BZZ2	1 - high confidence	Sialoadhesin	SN_HUMAN	CD169	6614	SIGLEC1	0.9975	2	1	1	0	yes
Human	P08637	1 - high confidence	Low affinity immunoglobulin gamma Fc region receptor III-A	FCG3A_HUMAN	CD16a	2214	FCGR3A	1	3	1	1	0	yes
Human	O75015	1 - high confidence	Low affinity immunoglobulin gamma Fc region receptor III-B	FCG3B_HUMAN	CD16b	2215	FCGR3B	1	2	1	1	1	yes
Human	O15389	1 - high confidence	Sialic acid-binding Ig-like lectin 5	SIGL5_HUMAN	CD170	8778	SIGLEC5	1	7	1	1	0	yes
Human	P32004	1 - high confidence	Neural cell adhesion molecule L1	L1CAM_HUMAN	CD171	3897	L1CAM	1	26	1	1	0	yes
Human	P78324	1 - high confidence	Tyrosine-protein phosphatase non-receptor type substrate 1	SHPS1_HUMAN	CD172a	140885	SIRPA	1	33	1	1	0	yes
Human	O00241	1 - high confidence	Signal-regulatory protein beta-1	SIRB1_HUMAN	CD172b	10326	SIRPB1	0.9986	10	1	1	0	yes
Human	Q9P1W8	1 - high confidence	Signal-regulatory protein gamma	SIRPG_HUMAN	CD172g	55423	SIRPG	1	2	1	1	0	yes
Human	P05107	1 - high confidence	Integrin beta-2	ITB2_HUMAN	CD18	3689	ITGB2	1	20	1	1	0	yes
Human	Q99467	1 - high confidence	CD180 antigen	CD180_HUMAN	CD180	4064	CD180	1	4	1	1	0	yes
Human	P25024	1 - high confidence	C-X-C chemokine receptor type 1	CXCR1_HUMAN	CD181	3577	CXCR1	0.99	1	1	6	0	yes
Human	P49682	1 - high confidence	C-X-C chemokine receptor type 3	CXCR3_HUMAN	CD183	2833	CXCR3	1	3	1	7	0	yes
Human	P32302	1 - high confidence	C-X-C chemokine receptor type 5	CXCR5_HUMAN	CD185	643	CXCR5	1	5	1	7	0	yes
Human	P15391	1 - high confidence	B-lymphocyte antigen CD19	CD19_HUMAN	CD19	930	CD19	0.9945	8	1	1	0	yes
Human	P51679	1 - high confidence	C-C chemokine receptor type 4	CCR4_HUMAN	CD194	1233	CCR4	0.9952	5	1	7	0	yes
Human	P32248	1 - high confidence	C-C chemokine receptor type 7	CCR7_HUMAN	CD197	1236	CCR7	1	9	1	7	0	yes
Human	P29016	1 - high confidence	T-cell surface glycoprotein CD1b	CD1B_HUMAN	CD1b	910	CD1B	1	1	1	1	0	yes
Human	P29017	1 - high confidence	T-cell surface glycoprotein CD1c	CD1C_HUMAN	CD1c	911	CD1C	1	3	1	1	0	yes
Human	P15813	1 - high confidence	T-cell surface glycoprotein CD1d	CD1D_HUMAN	CD1d	912	CD1D	1	1	1	1	0	yes
Human	P06729	1 - high confidence	T-cell surface antigen CD2	CD2_HUMAN	CD2	914	CD2	1	5	1	1	0	yes
Human	P11836	1 - high confidence	B-lymphocyte antigen CD20	CD20_HUMAN	CD20	931	MS4A1	1	5	1	4	0	yes
Human	P41217	1 - high confidence	OX-2 membrane glycoprotein	OX2G_HUMAN	CD200	4345	CD200	1	17	1	1	0	yes
Human	Q9UNN8	1 - high confidence	Endothelial protein C receptor	EPCR_HUMAN	CD201	10544	PROCR	1	26	1	1	0	yes
Human	Q02763	1 - high confidence	Angiopoietin-1 receptor	TIE2_HUMAN	CD202b	7010	TEK	0.9312	4	1	1	0	yes
Human	O14638	1 - high confidence	Ectonucleotide pyrophosphatase/phosphodiesterase family member 3	ENPP3_HUMAN	CD203c	5169	ENPP3	0.9692	3	1	1	0	yes
Human	P21757	2 - putative	Macrophage scavenger receptor types I and II	MSRE_HUMAN	CD204	4481	MSR1	0.9975	3	1	1	0	#N/A
Human	O60449	1 - high confidence	Lymphocyte antigen 75	LY75_HUMAN	CD205	4065	LY75	1	26	1	1	0	yes
Human	P22897	1 - high confidence	Macrophage mannose receptor 1	MRC1_HUMAN	CD206	4360	MRC1	0.99	1	1	1	0	yes
Human	Q9UQV4	1 - high confidence	Lysosome-associated membrane glycoprotein 3	LAMP3_HUMAN	CD208	27074	LAMP3	0.994	4	1	1	0	yes
Human	P20023	1 - high confidence	Complement receptor type 2	CR2_HUMAN	CD21	1380	CR2	1	7	1	1	0	yes
Human	P78552	1 - high confidence	Interleukin-13 receptor subunit alpha-1	I13R1_HUMAN	CD213a1	3597	IL13RA1	1	5	1	1	0	yes
Human	Q14627	1 - high confidence	Interleukin-13 receptor subunit alpha-2	I13R2_HUMAN	CD213a2	3598	IL13RA2	1	5	1	1	0	yes
Human	Q96F46	1 - high confidence	Interleukin-17 receptor A	I17RA_HUMAN	CD217	23765	IL17RA	1	23	1	1	0	yes
Human	Q13478	1 - high confidence	Interleukin-18 receptor 1	IL18R_HUMAN	CD218a	8809	IL18R1	1	11	1	1	0	yes
Human	P20273	1 - high confidence	B-cell receptor CD22	CD22_HUMAN	CD22	933	CD22	1	9	1	1	0	yes
Human	P06213	1 - high confidence	Insulin receptor	INSR_HUMAN	CD220	3643	INSR	1	28	1	1	0	yes
Human	P08069	1 - high confidence	Insulin-like growth factor 1 receptor	IGF1R_HUMAN	CD221	3480	IGF1R	1	38	1	1	0	yes
Human	P11717	1 - high confidence	Cation-independent mannose-6-phosphate receptor	MPRI_HUMAN	CD222	3482	IGF2R	1	30	1	1	0	yes
Human	P19440	3 - unspecific	Gamma-glutamyltranspeptidase 1	GGT1_HUMAN	CD224	2678	GGT1	1	24	0	0	0	#N/A
Human	Q15762	1 - high confidence	CD226 antigen	CD226_HUMAN	CD226	10666	CD226	1	5	1	1	0	yes
Human	P08582	1 - high confidence	Melanotransferrin	TRFM_HUMAN	CD228	4241	MFI2	1	15	0	0	1	yes
Human	Q9HBG7	1 - high confidence	T-lymphocyte surface antigen Ly-9	LY9_HUMAN	CD229	4063	LY9	1	9	1	1	0	yes
Human	P06734	1 - high confidence	Low affinity immunoglobulin epsilon Fc receptor	FCER2_HUMAN	CD23	2208	FCER2	1	10	1	1	0	yes
Human	P04156	1 - high confidence	Major prion protein	PRIO_HUMAN	CD230	5621	PRNP	1	46	1	2	1	yes
Human	O60486	1 - high confidence	Plexin-C1	PLXC1_HUMAN	CD232	10154	PLXNC1	1	14	1	2	0	yes
Human	P50895	1 - high confidence	Basal cell adhesion molecule	BCAM_HUMAN	CD239	4059	BCAM	0.9942	25	1	1	0	yes
Human	P08183	1 - high confidence	Multidrug resistance protein 1	MDR1_HUMAN	CD243	5243	ABCB1	1	8	1	12	0	yes
Human	Q9BZW8	1 - high confidence	Natural killer cell receptor 2B4	CD244_HUMAN	CD244	51744	CD244	1	6	1	1	0	yes
Human	Q07075	2 - putative	Glutamyl aminopeptidase	AMPE_HUMAN	CD249	2028	ENPEP	1	8	1	1	0	#N/A
Human	P01589	1 - high confidence	Interleukin-2 receptor subunit alpha	IL2RA_HUMAN	CD25	3559	IL2RA	1	2	1	1	0	yes
Human	P27487	1 - high confidence	Dipeptidyl peptidase 4	DPP4_HUMAN	CD26	1803	DPP4	1	22	0	0	0	yes
Human	Q9Y6Q6	1 - high confidence	Tumor necrosis factor receptor superfamily member 11A	TNR11_HUMAN	CD265	8792	TNFRSF11A	1	5	1	1	0	yes
Human	O14836	2 - putative	Tumor necrosis factor receptor superfamily member 13B	TR13B_HUMAN	CD267	23495	TNFRSF13B	0.9898	1	1	1	0	#N/A
Human	Q02223	1 - high confidence	Tumor necrosis factor receptor superfamily member 17	TNR17_HUMAN	CD269	608	TNFRSF17	1	6	1	1	0	yes
Human	P26842	1 - high confidence	CD27 antigen	CD27_HUMAN	CD27	939	CD27	1	7	1	1	0	yes
Human	Q7Z6A9	1 - high confidence	B- and T-lymphocyte attenuator	BTLA_HUMAN	CD272	151888	BTLA	1	4	1	1	0	yes
Human	Q9BQ51	1 - high confidence	Programmed cell death 1 ligand 2	PD1L2_HUMAN	CD273	80380	PDCD1LG2	1	9	1	1	0	yes
Human	Q9NZQ7	1 - high confidence	Programmed cell death 1 ligand 1	PD1L1_HUMAN	CD274	29126	CD274	0.9643	21	1	1	0	yes
Human	O75144	1 - high confidence	ICOS ligand	ICOSL_HUMAN	CD275	23308	ICOSLG	1	21	1	1	0	yes
Human	Q5ZPR3	1 - high confidence	CD276 antigen	CD276_HUMAN	CD276	80381	CD276	1	36	1	1	0	yes
Human	Q15116	1 - high confidence	Programmed cell death protein 1	PDCD1_HUMAN	CD279	5133	PDCD1	1	5	1	1	0	yes
Human	P10747	1 - high confidence	T-cell-specific surface glycoprotein CD28	CD28_HUMAN	CD28	940	CD28	1	4	1	1	0	yes
Human	Q9UBG0	1 - high confidence	C-type mannose receptor 2	MRC2_HUMAN	CD280	9902	MRC2	1	28	1	1	0	yes
Human	Q15399	1 - high confidence	Toll-like receptor 1	TLR1_HUMAN	CD281	7096	TLR1	0.9999	1	1	1	0	yes
Human	O60603	1 - high confidence	Toll-like receptor 2	TLR2_HUMAN	CD282	7097	TLR2	1	7	1	1	0	yes
Human	O15455	1 - high confidence	Toll-like receptor 3	TLR3_HUMAN	CD283	7098	TLR3	1	7	1	1	0	yes
Human	O00206	1 - high confidence	Toll-like receptor 4	TLR4_HUMAN	CD284	7099	TLR4	0.9933	5	1	1	0	yes
Human	Q9NR96	1 - high confidence	Toll-like receptor 9	TLR9_HUMAN	CD289	54106	TLR9	1	2	0	0	0	yes
Human	P05556	1 - high confidence	Integrin beta-1	ITB1_HUMAN	CD29	3688	ITGB1	1	45	1	1	0	yes
Human	Q9Y5Y4	1 - high confidence	Putative G-protein coupled receptor 44	GPR44_HUMAN	CD294	11251	GPR44	0.9902	4	1	7	0	yes
Human	P48357	1 - high confidence	Leptin receptor	LEPR_HUMAN	CD295	3953	LEPR	1	3	1	1	0	yes
Human	P54709	1 - high confidence	Sodium/potassium-transporting ATPase subunit beta-3	AT1B3_HUMAN	CD298	483	ATP1B3	1	45	1	1	0	yes
Human	P28908	1 - high confidence	Tumor necrosis factor receptor superfamily member 8	TNR8_HUMAN	CD30	943	TNFRSF8	0.9945	11	1	1	0	yes
Human	Q8IX05	1 - high confidence	CD302 antigen	CD302_HUMAN	CD302	9936	CD302	1	6	1	1	0	yes
Human	O14786	1 - high confidence	Neuropilin-1	NRP1_HUMAN	CD304	8829	NRP1	1	27	1	1	0	yes
Human	Q6GTX8	1 - high confidence	Leukocyte-associated immunoglobulin-like receptor 1	LAIR1_HUMAN	CD305	3903	LAIR1	1	11	1	1	0	yes
Human	Q96RD9	1 - high confidence	Fc receptor-like protein 5	FCRL5_HUMAN	CD307	83416	FCRL5	1	2	1	1	0	yes
Human	P16284	1 - high confidence	Platelet endothelial cell adhesion molecule	PECA1_HUMAN	CD31	5175	PECAM1	1	14	1	1	0	yes
Human	Q9UHX3	1 - high confidence	EGF-like module-containing mucin-like hormone receptor-like 2	EMR2_HUMAN	CD312	30817	EMR2	0.9992	29	1	7	0	yes
Human	Q9P2B2	1 - high confidence	Prostaglandin F2 receptor negative regulator	FPRP_HUMAN	CD315	5738	PTGFRN	1	30	1	1	0	yes
Human	Q969P0	1 - high confidence	Immunoglobulin superfamily member 8	IGSF8_HUMAN	CD316	93185	IGSF8	0.9956	36	1	1	0	yes
Human	Q10589	1 - high confidence	Bone marrow stromal antigen 2	BST2_HUMAN	CD317	684	BST2	1	34	1	1	1	yes
Human	Q9H5V8	1 - high confidence	CUB domain-containing protein 1	CDCP1_HUMAN	CD318	64866	CDCP1	1	12	1	1	0	yes
Human	Q9NQ25	1 - high confidence	SLAM family member 7	SLAF7_HUMAN	CD319	57823	SLAMF7	0.9918	5	1	1	0	yes
Human	P12318	1 - high confidence	Low affinity immunoglobulin gamma Fc region receptor II-a	FCG2A_HUMAN	CD32	2212	FCGR2A	0.9886	2	1	1	0	yes
Human	Q9Y624	1 - high confidence	Junctional adhesion molecule A	JAM1_HUMAN	CD321	50848	F11R	1	12	1	1	0	yes
Human	P57087	1 - high confidence	Junctional adhesion molecule B	JAM2_HUMAN	CD322	58494	JAM2	1	23	1	1	0	yes
Human	P12830	1 - high confidence	Cadherin-1	CADH1_HUMAN	CD324	999	CDH1	1	3	1	1	0	yes
Human	P19022	1 - high confidence	Cadherin-2	CADH2_HUMAN	CD325	1000	CDH2	1	27	1	1	0	yes
Human	P16422	1 - high confidence	Epithelial cell adhesion molecule	EPCAM_HUMAN	CD326	4072	EPCAM	1	4	1	1	0	yes
Human	O43699	1 - high confidence	Sialic acid-binding Ig-like lectin 6	SIGL6_HUMAN	CD327	946	SIGLEC6	0.9937	3	1	1	0	yes
Human	Q9Y286	1 - high confidence	Sialic acid-binding Ig-like lectin 7	SIGL7_HUMAN	CD328	27036	SIGLEC7	1	2	1	1	0	yes
Human	P20138	1 - high confidence	Myeloid cell surface antigen CD33	CD33_HUMAN	CD33	945	CD33	1	5	1	1	0	yes
Human	P11362	1 - high confidence	Basic fibroblast growth factor receptor 1	FGFR1_HUMAN	CD331	2260	FGFR1	1	17	1	1	0	yes
Human	P21802	1 - high confidence	Fibroblast growth factor receptor 2	FGFR2_HUMAN	CD332	2263	FGFR2	1	3	1	1	0	yes
Human	P22607	1 - high confidence	Fibroblast growth factor receptor 3	FGFR3_HUMAN	CD333	2261	FGFR3	1	2	1	1	0	yes
Human	P22455	1 - high confidence	Fibroblast growth factor receptor 4	FGFR4_HUMAN	CD334	2264	FGFR4	0.9963	3	1	1	0	yes
Human	O14931	1 - high confidence	Natural cytotoxicity triggering receptor 3	NCTR3_HUMAN	CD337	259197	NCR3	1	1	0	0	0	yes
Human	P78504	1 - high confidence	Protein jagged-1	JAG1_HUMAN	CD339	182	JAG1	0.9933	19	1	1	0	yes
Human	P28906	1 - high confidence	Hematopoietic progenitor cell antigen CD34	CD34_HUMAN	CD34	947	CD34	1	3	1	1	0	yes
Human	P04626	1 - high confidence	Receptor tyrosine-protein kinase erbB-2	ERBB2_HUMAN	CD340	2064	ERBB2	1	14	1	1	0	yes
Human	Q9ULV1	1 - high confidence	Frizzled-4	FZD4_HUMAN	CD344	8322	FZD4	0.9942	1	1	9	0	yes
Human	P17927	1 - high confidence	Complement receptor type 1	CR1_HUMAN	CD35	1378	CR1	1	5	1	1	0	yes
Human	P16671	2 - putative	Platelet glycoprotein 4	CD36_HUMAN	CD36	948	CD36	1	4	1	2	0	#N/A
Human	P11049	2 - putative	Leukocyte antigen CD37	CD37_HUMAN	CD37	951	CD37	0.9945	13	1	4	0	#N/A
Human	P28907	2 - putative	ADP-ribosyl cyclase 1	CD38_HUMAN	CD38	952	CD38	1	13	1	1	0	#N/A
Human	P49961	2 - putative	Ectonucleoside triphosphate diphosphohydrolase 1	ENTP1_HUMAN	CD39	953	ENTPD1	1	17	1	2	0	#N/A
Human	P04234	1 - high confidence	T-cell surface glycoprotein CD3 delta chain	CD3D_HUMAN	CD3d	915	CD3D	1	2	0	0	0	yes
Human	P09693	1 - high confidence	T-cell surface glycoprotein CD3 gamma chain	CD3G_HUMAN	CD3g	917	CD3G	1	1	1	1	0	yes
Human	P01730	1 - high confidence	T-cell surface glycoprotein CD4	CD4_HUMAN	CD4	920	CD4	1	3	1	1	0	yes
Human	P25942	1 - high confidence	Tumor necrosis factor receptor superfamily member 5	TNR5_HUMAN	CD40	958	CD40	1	25	1	1	0	yes
Human	P08514	1 - high confidence	Integrin alpha-IIb	ITA2B_HUMAN	CD41	3674	ITGA2B	0.99	3	1	1	0	yes
Human	P40197	1 - high confidence	Platelet glycoprotein V	GPV_HUMAN	CD42d	2814	GP5	1	3	1	1	0	yes
Human	P16070	1 - high confidence	CD44 antigen	CD44_HUMAN	CD44	960	CD44	1	42	1	1	0	yes
Human	P08575	1 - high confidence	Receptor-type tyrosine-protein phosphatase C	PTPRC_HUMAN	CD45	5788	PTPRC	1	19	1	1	0	yes
Human	P15529	1 - high confidence	Membrane cofactor protein	MCP_HUMAN	CD46	4179	CD46	1	37	1	1	0	yes
Human	Q08722	1 - high confidence	Leukocyte surface antigen CD47	CD47_HUMAN	CD47	961	CD47	1	44	1	5	0	yes
Human	P09326	1 - high confidence	CD48 antigen	CD48_HUMAN	CD48	962	CD48	1	15	1	1	1	yes
Human	P56199	1 - high confidence	Integrin alpha-1	ITA1_HUMAN	CD49a	3672	ITGA1	1	32	1	1	0	yes
Human	P17301	1 - high confidence	Integrin alpha-2	ITA2_HUMAN	CD49b	3673	ITGA2	1	31	1	1	0	yes
Human	P26006	1 - high confidence	Integrin alpha-3	ITA3_HUMAN	CD49c	3675	ITGA3	1	38	1	1	0	yes
Human	P13612	1 - high confidence	Integrin alpha-4	ITA4_HUMAN	CD49d	3676	ITGA4	1	30	1	1	0	yes
Human	P08648	1 - high confidence	Integrin alpha-5	ITA5_HUMAN	CD49e	3678	ITGA5	1	38	1	1	0	yes
Human	P23229	1 - high confidence	Integrin alpha-6	ITA6_HUMAN	CD49f	3655	ITGA6	1	30	1	1	0	yes
Human	P06127	1 - high confidence	T-cell surface glycoprotein CD5	CD5_HUMAN	CD5	921	CD5	1	5	1	1	0	yes
Human	P32942	1 - high confidence	Intercellular adhesion molecule 3	ICAM3_HUMAN	CD50	3385	ICAM3	1	17	1	1	0	yes
Human	P06756	1 - high confidence	Integrin alpha-V	ITAV_HUMAN	CD51	3685	ITGAV	1	42	1	1	0	yes
Human	P19397	2 - putative	Leukocyte surface antigen CD53	CD53_HUMAN	CD53	963	CD53	1	13	1	4	0	#N/A
Human	P05362	1 - high confidence	Intercellular adhesion molecule 1	ICAM1_HUMAN	CD54	3383	ICAM1	1	41	1	1	0	yes
Human	P08174	1 - high confidence	Complement decay-accelerating factor	DAF_HUMAN	CD55	1604	CD55	1	40	0	0	1	yes
Human	P13591	1 - high confidence	Neural cell adhesion molecule 1	NCAM1_HUMAN	CD56	4684	NCAM1	1	27	1	1	1	yes
Human	P19256	1 - high confidence	Lymphocyte function-associated antigen 3	LFA3_HUMAN	CD58	965	CD58	1	40	1	1	1	yes
Human	P13987	1 - high confidence	CD59 glycoprotein	CD59_HUMAN	CD59	966	CD59	1	45	0	0	1	yes
Human	P30203	1 - high confidence	T-cell differentiation antigen CD6	CD6_HUMAN	CD6	923	CD6	1	5	1	1	0	yes
Human	P05106	1 - high confidence	Integrin beta-3	ITB3_HUMAN	CD61	3690	ITGB3	1	10	1	1	0	yes
Human	P14151	1 - high confidence	L-selectin	LYAM1_HUMAN	CD62L	6402	SELL	1	9	1	1	0	yes
Human	P16109	1 - high confidence	P-selectin	LYAM3_HUMAN	CD62P	6403	SELP	0.99	2	1	1	0	yes
Human	P08962	1 - high confidence	CD63 antigen	CD63_HUMAN	CD63	967	CD63	1	42	1	4	0	yes
Human	P12314	1 - high confidence	High affinity immunoglobulin gamma Fc receptor I	FCGR1_HUMAN	CD64	2209	FCGR1A	1	2	1	1	0	yes
Human	P13688	1 - high confidence	Carcinoembryonic antigen-related cell adhesion molecule 1	CEAM1_HUMAN	CD66a	634	CEACAM1	1	10	1	1	0	yes
Human	P31997	1 - high confidence	Carcinoembryonic antigen-related cell adhesion molecule 8	CEAM8_HUMAN	CD66b	1088	CEACAM8	1	1	0	0	1	yes
Human	P40199	1 - high confidence	Carcinoembryonic antigen-related cell adhesion molecule 6	CEAM6_HUMAN	CD66c	4680	CEACAM6	1	1	1	1	1	yes
Human	P34810	1 - high confidence	Macrosialin	CD68_HUMAN	CD68	968	CD68	1	3	1	1	0	yes
Human	Q07108	2 - putative	Early activation antigen CD69	CD69_HUMAN	CD69	969	CD69	1	9	1	1	0	#N/A
Human	P09564	1 - high confidence	T-cell antigen CD7	CD7_HUMAN	CD7	924	CD7	1	7	1	1	0	yes
Human	P32970	2 - putative	CD70 antigen	CD70_HUMAN	CD70	970	CD70	1	22	1	1	0	#N/A
Human	P02786	1 - high confidence	Transferrin receptor protein 1	TFR1_HUMAN	CD71	7037	TFRC	1	38	1	1	0	yes
Human	P21854	2 - putative	B-cell differentiation antigen CD72	CD72_HUMAN	CD72	971	CD72	0.9945	5	1	1	0	#N/A
Human	P21589	1 - high confidence	5'-nucleotidase	5NTD_HUMAN	CD73	4907	NT5E	1	30	1	1	1	yes
Human	P04233	1 - high confidence	HLA class II histocompatibility antigen gamma chain	HG2A_HUMAN	CD74	972	CD74	0.9685	18	1	1	0	yes
Human	P11912	1 - high confidence	B-cell antigen receptor complex-associated protein alpha chain	CD79A_HUMAN	CD79a	973	CD79A	1	8	1	1	0	yes
Human	P40259	1 - high confidence	B-cell antigen receptor complex-associated protein beta chain	CD79B_HUMAN	CD79b	974	CD79B	1	7	1	1	0	yes
Human	P33681	1 - high confidence	T-lymphocyte activation antigen CD80	CD80_HUMAN	CD80	941	CD80	1	11	1	1	0	yes
Human	P27701	2 - putative	CD82 antigen	CD82_HUMAN	CD82	3732	CD82	1	29	1	4	0	#N/A
Human	Q01151	1 - high confidence	CD83 antigen	CD83_HUMAN	CD83	9308	CD83	1	15	1	1	0	yes
Human	Q9UIB8	1 - high confidence	SLAM family member 5	SLAF5_HUMAN	CD84	8832	CD84	1	10	1	1	0	yes
Human	A6NI73	1 - high confidence	Leukocyte immunoglobulin-like receptor subfamily A member 5	LIRA5_HUMAN	CD85f	353514	LILRA5	0.9875	1	1	1	0	yes
Human	O75019	1 - high confidence	Leukocyte immunoglobulin-like receptor subfamily A member 1	LIRA1_HUMAN	CD85i	11024	LILRA1	1	1	1	1	0	yes
Human	Q8NHL6	1 - high confidence	Leukocyte immunoglobulin-like receptor subfamily B member 1	LIRB1_HUMAN	CD85j	10859	LILRB1	1	8	1	1	0	yes
Human	P42081	1 - high confidence	T-lymphocyte activation antigen CD86	CD86_HUMAN	CD86	942	CD86	1	12	1	1	0	yes
Human	Q03405	1 - high confidence	Urokinase plasminogen activator surface receptor	UPAR_HUMAN	CD87	5329	PLAUR	1	27	0	0	1	yes
Human	P24071	1 - high confidence	Immunoglobulin alpha Fc receptor	FCAR_HUMAN	CD89	2204	FCAR	1	2	1	1	0	yes
Human	P04216	1 - high confidence	Thy-1 membrane glycoprotein	THY1_HUMAN	CD90	7070	THY1	1	25	0	0	1	yes
Human	Q07954	1 - high confidence	Prolow-density lipoprotein receptor-related protein 1	LRP1_HUMAN	CD91	4035	LRP1	1	28	1	1	0	yes
Human	Q8WWI5	1 - high confidence	Choline transporter-like protein 1	CTL1_HUMAN	CD92	23446	SLC44A1	0.9946	13	1	9	0	yes
Human	P25445	1 - high confidence	Tumor necrosis factor receptor superfamily member 6	TNR6_HUMAN	CD95	355	FAS	1	24	1	1	0	yes
Human	P40200	1 - high confidence	T-cell surface protein tactile	TACT_HUMAN	CD96	10225	CD96	1	9	1	1	0	yes
Human	P48960	1 - high confidence	CD97 antigen	CD97_HUMAN	CD97	976	CD97	1	42	1	7	0	yes
Human	P08195	1 - high confidence	4F2 cell-surface antigen heavy chain	4F2_HUMAN	CD98	6520	SLC3A2	1	46	1	1	0	yes
Human	Q13651	1 - high confidence	Interleukin-10 receptor subunit alpha	I10R1_HUMAN	CDw210a	3587	IL10RA	1	5	1	1	0	yes
Human	Q08334	1 - high confidence	Interleukin-10 receptor subunit beta	I10R2_HUMAN	CDw210b	3588	IL10RB	0.9933	16	1	1	0	yes
Human	O00451	1 - high confidence	GDNF family receptor alpha-2	GFRA2_HUMAN	no	2675	GFRA2	1	2	0	0	1	yes
Human	O95497	1 - high confidence	Pantetheinase	VNN1_HUMAN	no	8876	VNN1	1	8	0	0	1	yes
Human	P01871	1 - high confidence	Ig mu chain C region	IGHM_HUMAN	no	3507	IGHM	1	11	0	0	0	yes
Human	P04264	1 - high confidence	Keratin, type II cytoskeletal 1	K2C1_HUMAN	no	3848	KRT1	1	30	0	0	0	yes
Human	P05186	1 - high confidence	Alkaline phosphatase, tissue-nonspecific isozyme	PPBT_HUMAN	no	249	ALPL	1	8	0	0	1	yes
Human	P05187	1 - high confidence	Alkaline phosphatase, placental type	PPB1_HUMAN	no	250	ALPP	1	3	0	0	1	yes
Human	P06733	1 - high confidence	Alpha-enolase	ENOA_HUMAN	no	2023	ENO1	1	14	0	0	0	yes
Human	P14222	1 - high confidence	Perforin-1	PERF_HUMAN	no	5551	PRF1	1	3	0	0	0	yes
Human	P21796	1 - high confidence	Voltage-dependent anion-selective channel protein 1	VDAC1_HUMAN	no	7416	VDAC1	1	19	0	0	0	yes
Human	P22303	1 - high confidence	Acetylcholinesterase	ACES_HUMAN	no	43	ACHE	1	3	0	0	1	yes
Human	P55290	1 - high confidence	Cadherin-13	CAD13_HUMAN	no	1012	CDH13	1	19	0	0	1	yes
Human	Q12884	1 - high confidence	Seprase	SEPR_HUMAN	no	2191	FAP	1	18	0	0	0	yes
Human	Q12891	1 - high confidence	Hyaluronidase-2	HYAL2_HUMAN	no	8692	HYAL2	1	10	0	0	1	yes
Human	Q13421	1 - high confidence	Mesothelin	MSLN_HUMAN	no	10232	MSLN	1	10	0	0	1	yes
Human	Q14982	1 - high confidence	Opioid-binding protein/cell adhesion molecule	OPCM_HUMAN	no	4978	OPCML	1	4	0	0	1	yes
Human	Q8NFP4	1 - high confidence	MAM domain-containing glycosylphosphatidylinositol anchor protein 1	MDGA1_HUMAN	no	266727	MDGA1	1	4	0	0	1	yes
Human	Q9BZR6	1 - high confidence	Reticulon-4 receptor	RTN4R_HUMAN	no	65078	RTN4R	1	15	0	0	1	yes
Human	Q9P121	1 - high confidence	Neurotrimin	NTRI_HUMAN	no	50863	NTM	1	1	0	0	1	yes
Human	Q9Y2I2	1 - high confidence	Netrin-G1	NTNG1_HUMAN	no	22854	NTNG1	1	6	0	0	1	yes
Human	Q96QV1	1 - high confidence	Hedgehog-interacting protein	HHIP_HUMAN	no	64399	HHIP	0.9998	2	0	0	0	yes
Human	P51148	1 - high confidence	Ras-related protein Rab-5C	RAB5C_HUMAN	no	5878	RAB5C	0.9994	7	0	0	0	yes
Human	Q9NZ20	1 - high confidence	Group 3 secretory phospholipase A2	PA2G3_HUMAN	no	50487	PLA2G3	0.9972	1	0	0	0	yes
Human	Q9BZM4	1 - high confidence	NKG2D ligand 3	N2DL3_HUMAN	no	79465	ULBP3	0.9952	2	0	0	1	yes
Human	P78333	1 - high confidence	Glypican-5 [Cleaved into: Secreted glypican-5]	GPC5_HUMAN	no	2262	GPC5	0.9945	1	0	0	1	yes
Human	P04632	1 - high confidence	Calpain small subunit 1	CPNS1_HUMAN	no	826	CAPNS1	0.9938	3	0	0	0	yes
Human	Q8IYS5	1 - high confidence	Osteoclast-associated immunoglobulin-like receptor	OSCAR_HUMAN	no	126014	OSCAR	0.9933	1	0	0	0	yes
Human	P20827	1 - high confidence	Ephrin-A1	EFNA1_HUMAN	no	1942	EFNA1	0.992	1	0	0	1	yes
Human	Q8IWB1	1 - high confidence	Inositol 1,4,5-triphosphate receptor-interacting protein	IPRI_HUMAN	no	85450	ITPRIP	0.9908	6	0	0	0	yes
Human	Q9H9S5	1 - high confidence	Fukutin-related protein	FKRP_HUMAN	no	79147	FKRP	0.9904	10	0	0	0	yes
Human	Q8NCM8	1 - high confidence	Cytoplasmic dynein 2 heavy chain 1	DYHC2_HUMAN	no	79659	DYNC2H1	0.8875	1	0	0	0	yes
Human	P06276	1 - high confidence	Cholinesterase	CHLE_HUMAN	no	590	BCHE	1	2	0	0	0	yes
Human	P13727	1 - high confidence	Bone marrow proteoglycan	PRG2_HUMAN	no	5553	PRG2	1	1	0	0	0	yes
Human	A6NGN9	1 - high confidence	IgLON family member 5	IGLO5_HUMAN	no	402665	IGLON5	1	2	0	0	0	yes
Human	A6NMZ7	1 - high confidence	Collagen alpha-6(VI) chain	CO6A6_HUMAN	no	131873	COL6A6	1	2	0	0	0	yes
Human	O00468	1 - high confidence	Agrin	AGRIN_HUMAN	no	375790	AGRN	1	14	0	0	0	yes
Human	O15230	1 - high confidence	Laminin subunit alpha-5	LAMA5_HUMAN	no	3911	LAMA5	1	17	0	0	0	yes
Human	O43852	1 - high confidence	Calumenin	CALU_HUMAN	no	813	CALU	1	22	0	0	0	yes
Human	O75718	1 - high confidence	Cartilage-associated protein	CRTAP_HUMAN	no	10491	CRTAP	1	9	0	0	0	yes
Human	O94813	1 - high confidence	Slit homolog 2 protein	SLIT2_HUMAN	no	9353	SLIT2	1	8	0	0	0	yes
Human	O95084	1 - high confidence	Serine protease 23	PRS23_HUMAN	no	11098	PRSS23	1	9	0	0	0	yes
Human	P00450	1 - high confidence	Ceruloplasmin	CERU_HUMAN	no	1356	CP	1	6	0	0	0	yes
Human	P00738	1 - high confidence	Haptoglobin [Cleaved into: Haptoglobin alpha chain; Haptoglobin beta chain]	HPT_HUMAN	no	3240	HP	1	13	0	0	0	yes
Human	P01024	1 - high confidence	Complement C3	CO3_HUMAN	no	718	C3	1	4	0	0	0	yes
Human	P01042	1 - high confidence	Kininogen-1	KNG1_HUMAN	no	3827	KNG1	1	3	0	0	0	yes
Human	P01137	1 - high confidence	Transforming growth factor beta-1	TGFB1_HUMAN	no	7040	TGFB1	1	13	0	0	0	yes
Human	P01857	1 - high confidence	Ig gamma-1 chain C region	IGHG1_HUMAN	no	3500	IGHG1	1	5	0	0	0	yes
Human	P01859	1 - high confidence	Ig gamma-2 chain C region	IGHG2_HUMAN	no	3501	IGHG2	1	5	0	0	0	yes
Human	P02452	1 - high confidence	Collagen alpha-1(I) chain	CO1A1_HUMAN	no	1277	COL1A1	1	14	0	0	0	yes
Human	P02461	1 - high confidence	Collagen alpha-1(III) chain	CO3A1_HUMAN	no	1281	COL3A1	1	6	0	0	0	yes
Human	P02749	1 - high confidence	Beta-2-glycoprotein 1	APOH_HUMAN	no	350	APOH	1	6	0	0	0	yes
Human	P02751	1 - high confidence	Fibronectin	FINC_HUMAN	no	2335	FN1	1	25	0	0	0	yes
Human	P02765	1 - high confidence	Alpha-2-HS-glycoprotein	FETUA_HUMAN	no	197	AHSG	1	3	0	0	0	yes
Human	P02790	1 - high confidence	Hemopexin	HEMO_HUMAN	no	3263	HPX	1	13	0	0	0	yes
Human	P04004	1 - high confidence	Vitronectin	VTNC_HUMAN	no	7448	VTN	1	19	0	0	0	yes
Human	P04114	1 - high confidence	Apolipoprotein B-100	APOB_HUMAN	no	338	APOB	1	1	0	0	0	yes
Human	P04275	1 - high confidence	von Willebrand factor	VWF_HUMAN	no	7450	VWF	1	2	0	0	0	yes
Human	P05090	1 - high confidence	Apolipoprotein D	APOD_HUMAN	no	347	APOD	1	3	0	0	0	yes
Human	P05155	1 - high confidence	Plasma protease C1 inhibitor	IC1_HUMAN	no	710	SERPING1	1	1	0	0	0	yes
Human	P06744	1 - high confidence	Glucose-6-phosphate isomerase	G6PI_HUMAN	no	2821	GPI	1	13	0	0	0	yes
Human	P07093	1 - high confidence	Glia-derived nexin	GDN_HUMAN	no	5270	SERPINE2	1	10	0	0	0	yes
Human	P07585	1 - high confidence	Decorin	PGS2_HUMAN	no	1634	DCN	1	4	0	0	0	yes
Human	P07942	1 - high confidence	Laminin subunit beta-1	LAMB1_HUMAN	no	3912	LAMB1	1	28	0	0	0	yes
Human	P08123	1 - high confidence	Collagen alpha-2(I) chain	CO1A2_HUMAN	no	1278	COL1A2	1	13	0	0	0	yes
Human	P08603	1 - high confidence	Complement factor H	CFAH_HUMAN	no	3075	CFH	1	4	0	0	0	yes
Human	P10645	1 - high confidence	Chromogranin-A	CMGA_HUMAN	no	1113	CHGA	1	1	0	0	0	yes
Human	P10909	1 - high confidence	Clusterin	CLUS_HUMAN	no	1191	CLU	1	32	0	0	0	yes
Human	P11047	1 - high confidence	Laminin subunit gamma-1	LAMC1_HUMAN	no	3915	LAMC1	1	29	0	0	0	yes
Human	P12109	1 - high confidence	Collagen alpha-1(VI) chain	CO6A1_HUMAN	no	1291	COL6A1	1	7	0	0	0	yes
Human	P12110	1 - high confidence	Collagen alpha-2(VI) chain	CO6A2_HUMAN	no	1292	COL6A2	1	11	0	0	0	yes
Human	P12111	1 - high confidence	Collagen alpha-3(VI) chain	CO6A3_HUMAN	no	1293	COL6A3	1	15	0	0	0	yes
Human	P12814	1 - high confidence	Alpha-actinin-1	ACTN1_HUMAN	no	87	ACTN1	1	3	0	0	0	yes
Human	P13284	1 - high confidence	Gamma-interferon-inducible lysosomal thiol reductase	GILT_HUMAN	no	10437	IFI30	1	3	0	0	0	yes
Human	P17936	1 - high confidence	Insulin-like growth factor-binding protein 3	IBP3_HUMAN	no	3486	IGFBP3	1	7	0	0	0	yes
Human	P20851	1 - high confidence	C4b-binding protein beta chain	C4BPB_HUMAN	no	725	C4BPB	1	2	0	0	0	yes
Human	P20908	1 - high confidence	Collagen alpha-1(V) chain	CO5A1_HUMAN	no	1289	COL5A1	1	9	0	0	0	yes
Human	P21810	1 - high confidence	Biglycan	PGS1_HUMAN	no	633	BGN	1	9	0	0	0	yes
Human	P24043	1 - high confidence	Laminin subunit alpha-2	LAMA2_HUMAN	no	3908	LAMA2	1	4	0	0	0	yes
Human	P24821	1 - high confidence	Tenascin	TENA_HUMAN	no	3371	TNC	1	21	0	0	0	yes
Human	P25391	1 - high confidence	Laminin subunit alpha-1	LAMA1_HUMAN	no	284217	LAMA1	1	8	0	0	0	yes
Human	P25940	1 - high confidence	Collagen alpha-3(V) chain	CO5A3_HUMAN	no	50509	COL5A3	1	1	0	0	0	yes
Human	P27169	1 - high confidence	Serum paraoxonase/arylesterase 1	PON1_HUMAN	no	5444	PON1	1	7	0	0	0	yes
Human	P27797	1 - high confidence	Calreticulin	CALR_HUMAN	no	811	CALR	1	18	0	0	0	yes
Human	P28300	1 - high confidence	Protein-lysine 6-oxidase	LYOX_HUMAN	no	4015	LOX	1	8	0	0	0	yes
Human	P28799	1 - high confidence	Granulins	GRN_HUMAN	no	2896	GRN	1	8	0	0	0	yes
Human	P35555	1 - high confidence	Fibrillin-1	FBN1_HUMAN	no	2200	FBN1	1	13	0	0	0	yes
Human	P35556	1 - high confidence	Fibrillin-2	FBN2_HUMAN	no	2201	FBN2	1	1	0	0	0	yes
Human	P41221	1 - high confidence	Protein Wnt-5a	WNT5A_HUMAN	no	7474	WNT5A	1	16	0	0	0	yes
Human	P43251	1 - high confidence	Biotinidase	BTD_HUMAN	no	686	BTD	1	5	0	0	0	yes
Human	P47972	1 - high confidence	Neuronal pentraxin-2	NPTX2_HUMAN	no	4885	NPTX2	1	2	0	0	0	yes
Human	P51884	1 - high confidence	Lumican	LUM_HUMAN	no	4060	LUM	1	4	0	0	0	yes
Human	P51888	1 - high confidence	Prolargin	PRELP_HUMAN	no	5549	PRELP	1	1	0	0	0	yes
Human	P55083	1 - high confidence	Microfibril-associated glycoprotein 4	MFAP4_HUMAN	no	4239	MFAP4	1	9	0	0	0	yes
Human	P55268	1 - high confidence	Laminin subunit beta-2	LAMB2_HUMAN	no	3913	LAMB2	1	3	0	0	0	yes
Human	P58166	1 - high confidence	Inhibin beta E chain	INHBE_HUMAN	no	83729	INHBE	1	2	0	0	0	yes
Human	P67809	1 - high confidence	Nuclease-sensitive element-binding protein 1	YBOX1_HUMAN	no	4904	YBX1	1	15	0	0	0	yes
Human	P98160	1 - high confidence	Basement membrane-specific heparan sulfate proteoglycan core protein	PGBM_HUMAN	no	3339	HSPG2	1	18	0	0	0	yes
Human	Q08380	1 - high confidence	Galectin-3-binding protein	LG3BP_HUMAN	no	3959	LGALS3BP	1	31	0	0	0	yes
Human	Q08431	1 - high confidence	Lactadherin	MFGM_HUMAN	no	4240	MFGE8	1	18	0	0	0	yes
Human	Q11201	1 - high confidence	CMP-N-acetylneuraminate-beta-galactosamide-alpha-2,3-sialyltransferase 1	SIA4A_HUMAN	no	6482	ST3GAL1	1	14	0	0	0	yes
Human	Q11206	1 - high confidence	CMP-N-acetylneuraminate-beta-galactosamide-alpha-2,3-sialyltransferase 4	SIA4C_HUMAN	no	6484	ST3GAL4	1	8	0	0	0	yes
Human	Q12841	1 - high confidence	Follistatin-related protein 1	FSTL1_HUMAN	no	11167	FSTL1	1	9	0	0	0	yes
Human	Q13201	1 - high confidence	Multimerin-1	MMRN1_HUMAN	no	22915	MMRN1	1	3	0	0	0	yes
Human	Q13361	1 - high confidence	Microfibrillar-associated protein 5	MFAP5_HUMAN	no	8076	MFAP5	1	1	0	0	0	yes
Human	Q13751	1 - high confidence	Laminin subunit beta-3	LAMB3_HUMAN	no	3914	LAMB3	1	2	0	0	0	yes
Human	Q13753	1 - high confidence	Laminin subunit gamma-2	LAMC2_HUMAN	no	3918	LAMC2	1	3	0	0	0	yes
Human	Q14112	1 - high confidence	Nidogen-2	NID2_HUMAN	no	22795	NID2	1	2	0	0	0	yes
Human	Q14766	1 - high confidence	Latent-transforming growth factor beta-binding protein 1	LTBP1_HUMAN	no	4052	LTBP1	1	6	0	0	0	yes
Human	Q15389	1 - high confidence	Angiopoietin-1	ANGP1_HUMAN	no	284	ANGPT1	1	5	0	0	0	yes
Human	Q16363	1 - high confidence	Laminin subunit alpha-4	LAMA4_HUMAN	no	3910	LAMA4	1	17	0	0	0	yes
Human	Q16787	1 - high confidence	Laminin subunit alpha-3	LAMA3_HUMAN	no	3909	LAMA3	1	5	0	0	0	yes
Human	Q32P28	1 - high confidence	Prolyl 3-hydroxylase 1	P3H1_HUMAN	no	64175	LEPRE1	1	13	0	0	0	yes
Human	Q68BL8	1 - high confidence	Olfactomedin-like protein 2B	OLM2B_HUMAN	no	25903	OLFML2B	1	1	0	0	0	yes
Human	Q6P4A8	1 - high confidence	Putative phospholipase B-like 1	PLBL1_HUMAN	no	79887	PLBD1	1	2	0	0	0	yes
Human	Q7Z4R8	1 - high confidence	UPF0669 protein C6orf120	CF120_HUMAN	no	387263	C6orf120	1	1	0	0	0	yes
Human	Q7Z7G0	1 - high confidence	Target of Nesh-SH3	TARSH_HUMAN	no	25890	ABI3BP	1	2	0	0	0	yes
Human	Q92485	1 - high confidence	Acid sphingomyelinase-like phosphodiesterase 3b	ASM3B_HUMAN	no	27293	SMPDL3B	1	5	0	0	0	yes
Human	Q92626	1 - high confidence	Peroxidasin homolog	PXDN_HUMAN	no	7837	PXDN	1	7	0	0	0	yes
Human	Q92832	1 - high confidence	Protein kinase C-binding protein NELL1	NELL1_HUMAN	no	4745	NELL1	1	1	0	0	0	yes
Human	Q96RW7	1 - high confidence	Hemicentin-1	HMCN1_HUMAN	no	83872	HMCN1	1	2	0	0	0	yes
Human	Q99574	1 - high confidence	Neuroserpin	NEUS_HUMAN	no	5274	SERPINI1	1	1	0	0	0	yes
Human	Q99715	1 - high confidence	Collagen alpha-1(XII) chain	COCA1_HUMAN	no	1303	COL12A1	1	11	0	0	0	yes
Human	Q99985	1 - high confidence	Semaphorin-3C	SEM3C_HUMAN	no	10512	SEMA3C	1	7	0	0	0	yes
Human	Q9BXX0	1 - high confidence	EMILIN-2	EMIL2_HUMAN	no	84034	EMILIN2	1	1	0	0	0	yes
Human	Q9H1J7	1 - high confidence	Protein Wnt-5b	WNT5B_HUMAN	no	81029	WNT5B	1	1	0	0	0	yes
Human	Q9NR99	1 - high confidence	Matrix-remodeling-associated protein 5	MXRA5_HUMAN	no	25878	MXRA5	1	2	0	0	0	yes
Human	Q9NRN5	1 - high confidence	Olfactomedin-like protein 3	OLFL3_HUMAN	no	56944	OLFML3	1	3	0	0	0	yes
Human	Q9Y2E5	1 - high confidence	Epididymis-specific alpha-mannosidase	MA2B2_HUMAN	no	23324	MAN2B2	1	1	0	0	0	yes
Human	Q9Y5X9	1 - high confidence	Endothelial lipase	LIPE_HUMAN	no	9388	LIPG	1	2	0	0	0	yes
Human	Q9Y6C2	1 - high confidence	EMILIN-1	EMIL1_HUMAN	no	11117	EMILIN1	1	13	0	0	0	yes
Human	Q9Y6L7	1 - high confidence	Tolloid-like protein 2	TLL2_HUMAN	no	7093	TLL2	1	2	0	0	0	yes
Human	P02787	1 - high confidence	Serotransferrin	TRFE_HUMAN	no	7018	TF	0.9999	6	0	0	0	yes
Human	Q99988	1 - high confidence	Growth/differentiation factor 15	GDF15_HUMAN	no	9518	GDF15	0.9999	4	0	0	0	yes
Human	P04003	1 - high confidence	C4b-binding protein alpha chain	C4BPA_HUMAN	no	722	C4BPA	0.9981	1	0	0	0	yes
Human	P45452	1 - high confidence	Collagenase 3	MMP13_HUMAN	no	4322	MMP13	0.9976	3	0	0	0	yes
Human	P01011	1 - high confidence	Alpha-1-antichymotrypsin	AACT_HUMAN	no	12	SERPINA3	0.9975	2	0	0	0	yes
Human	P19823	1 - high confidence	Inter-alpha-trypsin inhibitor heavy chain H2	ITIH2_HUMAN	no	3698	ITIH2	0.9975	1	0	0	0	yes
Human	Q05707	1 - high confidence	Collagen alpha-1(XIV) chain	COEA1_HUMAN	no	7373	COL14A1	0.9975	8	0	0	0	yes
Human	P13611	1 - high confidence	Versican core protein	CSPG2_HUMAN	no	1462	VCAN	0.9973	6	0	0	0	yes
Human	P10646	1 - high confidence	Tissue factor pathway inhibitor	TFPI1_HUMAN	no	7035	TFPI	0.9972	20	0	0	0	yes
Human	P23560	1 - high confidence	Brain-derived neurotrophic factor	BDNF_HUMAN	no	627	BDNF	0.9972	1	0	0	0	yes
Human	Q14563	1 - high confidence	Semaphorin-3A	SEM3A_HUMAN	no	10371	SEMA3A	0.9972	5	0	0	0	yes
Human	Q96A83	1 - high confidence	Collagen alpha-1(XXVI) chain	EMID2_HUMAN	no	136227	EMID2	0.9972	1	0	0	0	yes
Human	Q9Y646	1 - high confidence	Plasma glutamate carboxypeptidase	PGCP_HUMAN	no	10404	PGCP	0.9972	3	0	0	0	yes
Human	P05120	1 - high confidence	Plasminogen activator inhibitor 2	PAI2_HUMAN	no	5055	SERPINB2	0.997	1	0	0	0	yes
Human	P48307	1 - high confidence	Tissue factor pathway inhibitor 2	TFPI2_HUMAN	no	7980	TFPI2	0.997	7	0	0	0	yes
Human	Q8N3Z0	1 - high confidence	Inactive serine protease 35	PRS35_HUMAN	no	167681	PRSS35	0.997	2	0	0	0	yes
Human	O14498	1 - high confidence	Immunoglobulin superfamily containing leucine-rich repeat protein	ISLR_HUMAN	no	3671	ISLR	0.9967	2	0	0	0	yes
Human	O75462	1 - high confidence	Cytokine receptor-like factor 1	CRLF1_HUMAN	no	9244	CRLF1	0.9967	2	0	0	0	yes
Human	P00734	1 - high confidence	Prothrombin	THRB_HUMAN	no	2147	F2	0.9967	10	0	0	0	yes
Human	P22105	1 - high confidence	Tenascin-X	TENX_HUMAN	no	7148	TNXB	0.9967	1	0	0	0	yes
Human	Q6ZMP0	1 - high confidence	Thrombospondin type-1 domain-containing protein 4	THSD4_HUMAN	no	79875	THSD4	0.9967	1	0	0	0	yes
Human	Q9NS15	1 - high confidence	Latent-transforming growth factor beta-binding protein 3	LTBP3_HUMAN	no	4054	LTBP3	0.9967	4	0	0	0	yes
Human	O00300	1 - high confidence	Tumor necrosis factor receptor superfamily member 11B	TR11B_HUMAN	no	4982	TNFRSF11B	0.9966	1	0	0	0	yes
Human	Q02388	1 - high confidence	Collagen alpha-1(VII) chain	CO7A1_HUMAN	no	1294	COL7A1	0.9966	2	0	0	0	yes
Human	O95841	1 - high confidence	Angiopoietin-related protein 1	ANGL1_HUMAN	no	9068	ANGPTL1	0.9964	1	0	0	0	yes
Human	O00634	1 - high confidence	Netrin-3	NET3_HUMAN	no	4917	NTN3	0.9957	1	0	0	0	yes
Human	O75629	1 - high confidence	Protein CREG1	CREG1_HUMAN	no	8804	CREG1	0.9957	5	0	0	0	yes
Human	O95158	1 - high confidence	Neurexophilin-4	NXPH4_HUMAN	no	11247	NXPH4	0.9957	1	0	0	0	yes
Human	Q6UXH1	1 - high confidence	Cysteine-rich with EGF-like domain protein 2	CREL2_HUMAN	no	79174	CRELD2	0.9957	3	0	0	0	yes
Human	O43897	1 - high confidence	Tolloid-like protein 1	TLL1_HUMAN	no	7092	TLL1	0.9956	3	0	0	0	yes
Human	P01033	1 - high confidence	Metalloproteinase inhibitor 1	TIMP1_HUMAN	no	7076	TIMP1	0.9956	27	0	0	0	yes
Human	P05997	1 - high confidence	Collagen alpha-2(V) chain	CO5A2_HUMAN	no	1290	COL5A2	0.9956	9	0	0	0	yes
Human	Q96JB6	1 - high confidence	Lysyl oxidase homolog 4	LOXL4_HUMAN	no	84171	LOXL4	0.9956	1	0	0	0	yes
Human	Q9BY76	1 - high confidence	Angiopoietin-related protein 4	ANGL4_HUMAN	no	51129	ANGPTL4	0.9956	4	0	0	0	yes
Human	O75094	1 - high confidence	Slit homolog 3 protein	SLIT3_HUMAN	no	6586	SLIT3	0.9952	9	0	0	0	yes
Human	P36955	1 - high confidence	Pigment epithelium-derived factor	PEDF_HUMAN	no	5176	SERPINF1	0.9952	6	0	0	0	yes
Human	Q68BL7	1 - high confidence	Olfactomedin-like protein 2A	OLM2A_HUMAN	no	169611	OLFML2A	0.9952	1	0	0	0	yes
Human	O60565	1 - high confidence	Gremlin-1	GREM1_HUMAN	no	26585	GREM1	0.9946	2	0	0	0	yes
Human	P55058	1 - high confidence	Phospholipid transfer protein	PLTP_HUMAN	no	5360	PLTP	0.9946	17	0	0	0	yes
Human	Q15063	1 - high confidence	Periostin	POSTN_HUMAN	no	10631	POSTN	0.9946	3	0	0	0	yes
Human	Q76M96	1 - high confidence	Coiled-coil domain-containing protein 80	CCD80_HUMAN	no	151887	CCDC80	0.9945	2	0	0	0	yes
Human	P00488	1 - high confidence	Coagulation factor XIII A chain	F13A_HUMAN	no	2162	F13A1	0.9942	1	0	0	0	yes
Human	P01009	1 - high confidence	Alpha-1-antitrypsin	A1AT_HUMAN	no	5265	SERPINA1	0.9942	6	0	0	0	yes
Human	P0C0L4	1 - high confidence	Complement C4-A	CO4A_HUMAN	no	720	C4A	0.9942	9	0	0	0	yes
Human	P20774	1 - high confidence	Mimecan	MIME_HUMAN	no	4969	OGN	0.9942	1	0	0	0	yes
Human	Q6UY14	1 - high confidence	ADAMTS-like protein 4	ATL4_HUMAN	no	54507	ADAMTSL4	0.9942	3	0	0	0	yes
Human	Q9BXN1	1 - high confidence	Asporin	ASPN_HUMAN	no	54829	ASPN	0.9942	1	0	0	0	yes
Human	A8TX70	1 - high confidence	Collagen alpha-5(VI) chain	CO6A5_HUMAN	no	256076	COL29A1	0.9939	2	0	0	0	yes
Human	P01861	1 - high confidence	Ig gamma-4 chain C region	IGHG4_HUMAN	no	3503	IGHG4	0.9939	4	0	0	0	yes
Human	P12107	1 - high confidence	Collagen alpha-1(XI) chain	COBA1_HUMAN	no	1301	COL11A1	0.9939	2	0	0	0	yes
Human	Q9UJJ9	1 - high confidence	N-acetylglucosamine-1-phosphotransferase subunit gamma	GNPTG_HUMAN	no	84572	GNPTG	0.9939	1	0	0	0	yes
Human	Q9UM22	1 - high confidence	Mammalian ependymin-related protein 1	EPDR1_HUMAN	no	54749	EPDR1	0.9938	2	0	0	0	yes
Human	P02675	1 - high confidence	Fibrinogen beta chain [Cleaved into: Fibrinopeptide B]	FIBB_HUMAN	no	2244	FGB	0.9934	21	0	0	0	yes
Human	P00749	1 - high confidence	Urokinase-type plasminogen activator	UROK_HUMAN	no	5328	PLAU	0.9933	19	0	0	0	yes
Human	P02458	1 - high confidence	Collagen alpha-1(II) chain	CO2A1_HUMAN	no	1280	COL2A1	0.9924	3	0	0	0	yes
Human	Q9UKU9	1 - high confidence	Angiopoietin-related protein 2	ANGL2_HUMAN	no	23452	ANGPTL2	0.9924	4	0	0	0	yes
Human	P02671	1 - high confidence	Fibrinogen alpha chain [Cleaved into: Fibrinopeptide A]	FIBA_HUMAN	no	2243	FGA	0.9918	5	0	0	0	yes
Human	Q9UBP4	1 - high confidence	Dickkopf-related protein 3	DKK3_HUMAN	no	27122	DKK3	0.9909	3	0	0	0	yes
Human	Q66K79	1 - high confidence	Carboxypeptidase Z	CBPZ_HUMAN	no	8532	CPZ	0.9906	2	0	0	0	yes
Human	P02760	1 - high confidence	Protein AMBP [Cleaved into: Alpha-1-microglobulin	AMBP_HUMAN	no	259	AMBP	0.9905	2	0	0	0	yes
Human	Q9H741	1 - high confidence	UPF0454 protein C12orf49	CL049_HUMAN	no	79794	C12orf49	0.9905	3	0	0	0	yes
Human	Q15438	1 - high confidence	Cytohesin-1	CYH1_HUMAN	no	9267	CYTH1	0.9902	5	0	0	0	yes
Human	Q15517	1 - high confidence	Corneodesmosin	CDSN_HUMAN	no	1041	CDSN	0.9901	10	0	0	0	yes
Human	Q96GW7	1 - high confidence	Brevican core protein	PGCB_HUMAN	no	63827	BCAN	0.99	2	0	0	1	yes
Human	P02763	1 - high confidence	Alpha-1-acid glycoprotein 1	A1AG1_HUMAN	no	5004	ORM1	0.9877	4	0	0	0	yes
Human	P98095	1 - high confidence	Fibulin-2	FBLN2_HUMAN	no	2199	FBLN2	0.9872	2	0	0	0	yes
Human	Q8IUX7	1 - high confidence	Adipocyte enhancer-binding protein 1	AEBP1_HUMAN	no	165	AEBP1	0.9872	4	0	0	0	yes
Human	P01023	1 - high confidence	Alpha-2-macroglobulin	A2MG_HUMAN	no	2	A2M	0.9859	5	0	0	0	yes
Human	Q9P2M7	1 - high confidence	Cingulin	CING_HUMAN	no	57530	CGN	0.9803	2	0	0	0	yes
Human	Q8TE58	1 - high confidence	A disintegrin and metalloproteinase with thrombospondin motifs 15	ATS15_HUMAN	no	170689	ADAMTS15	0.9768	2	0	0	0	yes
Human	O96014	1 - high confidence	Protein Wnt-11	WNT11_HUMAN	no	7481	WNT11	0.9751	1	0	0	0	yes
Human	Q8TAD2	1 - high confidence	Interleukin-17D	IL17D_HUMAN	no	53342	IL17D	0.9748	1	0	0	0	yes
Human	Q96EE4	1 - high confidence	Coiled-coil domain-containing protein 126	CC126_HUMAN	no	90693	CCDC126	0.9708	10	0	0	0	yes
Human	P02788	1 - high confidence	Lactotransferrin	TRFL_HUMAN	no	4057	LTF	0.9577	1	0	0	0	yes
Human	P00750	1 - high confidence	Tissue-type plasminogen activator	TPA_HUMAN	no	5327	PLAT	0.9432	3	0	0	0	yes
Human	P12259	1 - high confidence	Coagulation factor V	FA5_HUMAN	no	2153	F5	0.9361	19	0	0	0	yes
Human	Q9BXJ5	1 - high confidence	Complement C1q tumor necrosis factor-related protein 2	C1QT2_HUMAN	no	114898	C1QTNF2	0.9041	2	0	0	0	yes
Human	Q12805	1 - high confidence	EGF-containing fibulin-like extracellular matrix protein 1	FBLN3_HUMAN	no	2202	EFEMP1	0.8419	1	0	0	0	yes
Human	P49767	1 - high confidence	Vascular endothelial growth factor C	VEGFC_HUMAN	no	7424	VEGFC	0.8412	1	0	0	0	yes
Human	P13497	1 - high confidence	Bone morphogenetic protein 1	BMP1_HUMAN	no	649	BMP1	1	1	0	0	0	yes
Human	P61978	1 - high confidence	Heterogeneous nuclear ribonucleoprotein K	HNRPK_HUMAN	no	3190	HNRNPK	1	19	0	0	0	yes
Human	Q99784	1 - high confidence	Noelin	NOE1_HUMAN	no	10439	OLFM1	1	1	0	0	0	yes
Human	Q9UHL4	1 - high confidence	Dipeptidyl peptidase 2	DPP2_HUMAN	no	29952	DPP7	1	4	0	0	0	yes
Human	P07339	1 - high confidence	Cathepsin D	CATD_HUMAN	no	1509	CTSD	0.9956	21	0	0	0	yes
Human	P33527	1 - high confidence	Multidrug resistance-associated protein 1	MRP1_HUMAN	no	4363	ABCC1	1	16	1	16	0	yes
Human	Q96PB1	1 - high confidence	CAS1 domain-containing protein 1	CASD1_HUMAN	no	64921	CASD1	1	4	1	14	0	yes
Human	Q9UHW9	1 - high confidence	Solute carrier family 12 member 6	S12A6_HUMAN	no	9990	SLC12A6	1	24	1	14	0	yes
Human	P19634	1 - high confidence	Sodium/hydrogen exchanger 1	SL9A1_HUMAN	no	6548	SLC9A1	1	20	1	13	0	yes
Human	Q9BXP2	1 - high confidence	Solute carrier family 12 member 9	S12A9_HUMAN	no	56996	SLC12A9	1	18	1	13	0	yes
Human	P11166	1 - high confidence	Solute carrier family 2, facilitated glucose transporter member 1	GTR1_HUMAN	no	6513	SLC2A1	1	42	1	12	0	yes
Human	P31641	1 - high confidence	Sodium- and chloride-dependent taurine transporter	SC6A6_HUMAN	no	6533	SLC6A6	1	11	1	12	0	yes
Human	Q96BD0	1 - high confidence	Solute carrier organic anion transporter family member 4A1	SO4A1_HUMAN	no	28231	SLCO4A1	1	14	1	12	0	yes
Human	Q9UGH3	1 - high confidence	Solute carrier family 23 member 2	S23A2_HUMAN	no	9962	SLC23A2	1	6	1	12	0	yes
Human	Q9UIG8	1 - high confidence	Solute carrier organic anion transporter family member 3A1	SO3A1_HUMAN	no	28232	SLCO3A1	1	15	1	12	0	yes
Human	P58743	1 - high confidence	Prestin	S26A5_HUMAN	no	375611	SLC26A5	1	1	1	11	0	yes
Human	Q14542	1 - high confidence	Equilibrative nucleoside transporter 2	S29A2_HUMAN	no	3177	SLC29A2	1	15	1	11	0	yes
Human	Q99808	1 - high confidence	Equilibrative nucleoside transporter 1	S29A1_HUMAN	no	2030	SLC29A1	1	45	1	11	0	yes
Human	Q9H2H9	1 - high confidence	Sodium-coupled neutral amino acid transporter 1	S38A1_HUMAN	no	81539	SLC38A1	1	28	1	11	0	yes
Human	Q9Y6M7	1 - high confidence	Sodium bicarbonate cotransporter 3	S4A7_HUMAN	no	9497	SLC4A7	1	34	1	11	0	yes
Human	Q13336	1 - high confidence	Urea transporter 1	UT1_HUMAN	no	6563	SLC14A1	1	5	1	10	0	yes
Human	Q6UWJ1	1 - high confidence	Transmembrane and coiled-coil domain-containing protein 3	TMCO3_HUMAN	no	55002	TMCO3	1	2	1	10	0	yes
Human	Q8TCT8	1 - high confidence	Signal peptide peptidase-like 2A	PSL2_HUMAN	no	84888	SPPL2A	1	15	1	9	0	yes
Human	Q9HD45	1 - high confidence	Transmembrane 9 superfamily member 3	TM9S3_HUMAN	no	56889	TM9SF3	1	44	1	9	0	yes
Human	A1A5B4	1 - high confidence	Anoctamin-9	ANO9_HUMAN	no	338440	ANO9	1	8	1	8	0	yes
Human	P05023	1 - high confidence	Sodium/potassium-transporting ATPase subunit alpha-1	AT1A1_HUMAN	no	476	ATP1A1	1	12	1	8	0	yes
Human	P13637	1 - high confidence	Sodium/potassium-transporting ATPase subunit alpha-3	AT1A3_HUMAN	no	478	ATP1A3	1	2	1	8	0	yes
Human	Q4KMQ2	1 - high confidence	Anoctamin-6	ANO6_HUMAN	no	196527	ANO6	1	45	1	8	0	yes
Human	Q9Y487	1 - high confidence	V-type proton ATPase 116 kDa subunit a isoform 2	VPP2_HUMAN	no	23545	ATP6V0A2	1	16	1	8	0	yes
Human	O00398	1 - high confidence	Putative P2Y purinoceptor 10	P2Y10_HUMAN	no	27334	P2RY10	1	3	1	7	0	yes
Human	O43194	1 - high confidence	G-protein coupled receptor 39	GPR39_HUMAN	no	2863	GPR39	1	11	1	7	0	yes
Human	O95136	1 - high confidence	Sphingosine 1-phosphate receptor 2	S1PR2_HUMAN	no	9294	S1PR2	1	31	1	7	0	yes
Human	O95490	1 - high confidence	Latrophilin-2	LPHN2_HUMAN	no	23266	LPHN2	1	17	1	7	0	yes
Human	P07550	1 - high confidence	Beta-2 adrenergic receptor	ADRB2_HUMAN	no	154	ADRB2	1	2	1	7	0	yes
Human	P18825	1 - high confidence	Alpha-2C adrenergic receptor	ADA2C_HUMAN	no	152	ADRA2C	1	3	1	7	0	yes
Human	P21731	1 - high confidence	Thromboxane A2 receptor	TA2R_HUMAN	no	6915	TBXA2R	1	13	1	7	0	yes
Human	P25105	1 - high confidence	Platelet-activating factor receptor	PTAFR_HUMAN	no	5724	PTAFR	1	5	1	7	0	yes
Human	P25116	1 - high confidence	Proteinase-activated receptor 1	PAR1_HUMAN	no	2149	F2R	1	19	1	7	0	yes
Human	P25929	1 - high confidence	Neuropeptide Y receptor type 1	NPY1R_HUMAN	no	4886	NPY1R	1	2	1	7	0	yes
Human	P30556	1 - high confidence	Type-1 angiotensin II receptor	AGTR1_HUMAN	no	185	AGTR1	1	1	1	7	0	yes
Human	P30989	1 - high confidence	Neurotensin receptor type 1	NTR1_HUMAN	no	4923	NTSR1	1	2	1	7	0	yes
Human	P34972	1 - high confidence	Cannabinoid receptor 2	CNR2_HUMAN	no	1269	CNR2	1	3	1	7	0	yes
Human	P43116	1 - high confidence	Prostaglandin E2 receptor EP2 subtype	PE2R2_HUMAN	no	5732	PTGER2	1	8	1	7	0	yes
Human	Q16602	1 - high confidence	Calcitonin gene-related peptide type 1 receptor	CALRL_HUMAN	no	10203	CALCRL	1	5	1	7	0	yes
Human	Q5VW38	1 - high confidence	Protein GPR107	GP107_HUMAN	no	57720	GPR107	1	20	1	7	0	yes
Human	Q86SQ4	1 - high confidence	G-protein coupled receptor 126	GP126_HUMAN	no	57211	GPR126	1	16	1	7	0	yes
Human	Q86VZ1	1 - high confidence	P2Y purinoceptor 8	P2RY8_HUMAN	no	286530	P2RY8	1	8	1	7	0	yes
Human	Q8IWK6	1 - high confidence	Probable G-protein coupled receptor 125	GP125_HUMAN	no	166647	GPR125	1	15	1	7	0	yes
Human	Q8NBN3	1 - high confidence	Transmembrane protein 87A	TM87A_HUMAN	no	25963	TMEM87A	1	27	1	7	0	yes
Human	Q96AM1	1 - high confidence	Mas-related G-protein coupled receptor member F	MRGRF_HUMAN	no	116535	MRGPRF	1	3	1	7	0	yes
Human	Q96K49	1 - high confidence	Transmembrane protein 87B	TM87B_HUMAN	no	84910	TMEM87B	1	12	1	7	0	yes
Human	Q96RI0	1 - high confidence	Proteinase-activated receptor 4	PAR4_HUMAN	no	9002	F2RL3	1	1	1	7	0	yes
Human	Q99835	1 - high confidence	Smoothened homolog	SMO_HUMAN	no	6608	SMO	1	5	1	7	0	yes
Human	Q9BY15	1 - high confidence	EGF-like module-containing mucin-like hormone receptor-like 3	EMR3_HUMAN	no	84658	EMR3	1	1	1	7	0	yes
Human	Q9HB89	1 - high confidence	Neuromedin-U receptor 1	NMUR1_HUMAN	no	10316	NMUR1	1	2	1	7	0	yes
Human	Q9HBW9	1 - high confidence	EGF, latrophilin and seven transmembrane domain-containing protein 1	ELTD1_HUMAN	no	64123	ELTD1	1	3	1	7	0	yes
Human	Q9HCN3	1 - high confidence	Transmembrane protein 8A	TMM8A_HUMAN	no	58986	TMEM8A	1	8	1	7	0	yes
Human	Q9HCU4	1 - high confidence	Cadherin EGF LAG seven-pass G-type receptor 2	CELR2_HUMAN	no	1952	CELSR2	1	8	1	7	0	yes
Human	Q9NYQ6	1 - high confidence	Cadherin EGF LAG seven-pass G-type receptor 1	CELR1_HUMAN	no	9620	CELSR1	1	13	1	7	0	yes
Human	Q9NYQ7	1 - high confidence	Cadherin EGF LAG seven-pass G-type receptor 3	CELR3_HUMAN	no	1951	CELSR3	1	2	1	7	0	yes
Human	Q9Y271	1 - high confidence	Cysteinyl leukotriene receptor 1	CLTR1_HUMAN	no	10800	CYSLTR1	1	2	1	7	0	yes
Human	Q9Y653	1 - high confidence	G-protein coupled receptor 56	GPR56_HUMAN	no	9289	GPR56	1	15	1	7	0	yes
Human	O14494	1 - high confidence	Lipid phosphate phosphohydrolase 1	LPP1_HUMAN	no	8611	PPAP2A	1	10	1	6	0	yes
Human	P22001	1 - high confidence	Potassium voltage-gated channel subfamily A member 3	KCNA3_HUMAN	no	3738	KCNA3	1	4	1	6	0	yes
Human	Q13433	1 - high confidence	Zinc transporter ZIP6	S39A6_HUMAN	no	25800	SLC39A6	1	41	1	6	0	yes
Human	Q15043	1 - high confidence	Zinc transporter ZIP14	S39AE_HUMAN	no	23516	SLC39A14	1	42	1	6	0	yes
Human	Q96G91	1 - high confidence	P2Y purinoceptor 11	P2Y11_HUMAN	no	5032	P2RY11	1	5	1	6	0	yes
Human	Q9ULF5	1 - high confidence	Zinc transporter ZIP10	S39AA_HUMAN	no	57181	SLC39A10	1	32	1	6	0	yes
Human	P04839	1 - high confidence	Cytochrome b-245 heavy chain	CY24B_HUMAN	no	1536	CYBB	1	13	1	5	0	yes
Human	Q8N271	1 - high confidence	Prominin-2	PROM2_HUMAN	no	150696	PROM2	1	2	1	5	0	yes
Human	Q9BSA4	1 - high confidence	Protein tweety homolog 2	TTYH2_HUMAN	no	94015	TTYH2	1	6	1	5	0	yes
Human	Q9C0H2	1 - high confidence	Protein tweety homolog 3	TTYH3_HUMAN	no	80727	TTYH3	1	24	1	5	0	yes
Human	P28472	1 - high confidence	Gamma-aminobutyric acid receptor subunit beta-3	GBRB3_HUMAN	no	2562	GABRB3	1	1	1	4	0	yes
Human	Q13003	1 - high confidence	Glutamate receptor, ionotropic kainate 3	GRIK3_HUMAN	no	2899	GRIK3	1	2	1	4	0	yes
Human	Q13491	1 - high confidence	Neuronal membrane glycoprotein M6-b	GPM6B_HUMAN	no	2824	GPM6B	1	9	1	4	0	yes
Human	Q6P4Q7	1 - high confidence	Metal transporter CNNM4	CNNM4_HUMAN	no	26504	CNNM4	1	35	1	4	0	yes
Human	Q8NE01	1 - high confidence	Metal transporter CNNM3	CNNM3_HUMAN	no	26505	CNNM3	1	7	1	3	0	yes
Human	Q96PD2	1 - high confidence	Discoidin, CUB and LCCL domain-containing protein 2	DCBD2_HUMAN	no	131566	DCBLD2	1	18	1	3	0	yes
Human	A2VDJ0	1 - high confidence	Transmembrane protein 131-like	T131L_HUMAN	no	23240	KIAA0922	1	2	1	2	0	yes
Human	O43155	1 - high confidence	Leucine-rich repeat transmembrane protein FLRT2	FLRT2_HUMAN	no	23768	FLRT2	1	9	1	2	0	yes
Human	O75882	1 - high confidence	Attractin	ATRN_HUMAN	no	8455	ATRN	1	29	1	2	0	yes
Human	P23470	1 - high confidence	Receptor-type tyrosine-protein phosphatase gamma	PTPRG_HUMAN	no	5793	PTPRG	1	21	1	2	0	yes
Human	P48551	1 - high confidence	Interferon alpha/beta receptor 2	INAR2_HUMAN	no	3455	IFNAR2	1	21	1	2	0	yes
Human	P54756	1 - high confidence	Ephrin type-A receptor 5	EPHA5_HUMAN	no	2044	EPHA5	1	5	1	2	0	yes
Human	Q01973	1 - high confidence	Tyrosine-protein kinase transmembrane receptor ROR1	ROR1_HUMAN	no	4919	ROR1	1	5	1	2	0	yes
Human	Q8IYR6	1 - high confidence	Tomoregulin-1	TEFF1_HUMAN	no	8577	TMEFF1	1	1	1	2	0	yes
Human	Q99572	1 - high confidence	P2X purinoceptor 7	P2RX7_HUMAN	no	5027	P2RX7	1	7	1	2	0	yes
Human	Q9BRN9	1 - high confidence	TM2 domain-containing protein 3	TM2D3_HUMAN	no	80213	TM2D3	1	11	1	2	0	yes
Human	Q9BX74	1 - high confidence	TM2 domain-containing protein 1	TM2D1_HUMAN	no	83941	TM2D1	1	17	1	2	0	yes
Human	A8MVW5	1 - high confidence	HEPACAM family member 2	HECA2_HUMAN	no	253012	HEPACAM2	1	1	1	1	0	yes
Human	O00478	1 - high confidence	Butyrophilin subfamily 3 member A3	BT3A3_HUMAN	no	10384	BTN3A3	1	33	1	1	0	yes
Human	O00533	1 - high confidence	Neural cell adhesion molecule L1-like protein	CHL1_HUMAN	no	10752	CHL1	1	4	1	1	0	yes
Human	O00592	1 - high confidence	Podocalyxin-like protein 1	PODXL_HUMAN	no	5420	PODXL	1	13	1	1	0	yes
Human	O14917	1 - high confidence	Protocadherin-17	PCD17_HUMAN	no	27253	PCDH17	1	2	1	1	0	yes
Human	O15031	1 - high confidence	Plexin-B2	PLXB2_HUMAN	no	23654	PLXNB2	1	40	1	1	0	yes
Human	O15394	1 - high confidence	Neural cell adhesion molecule 2	NCAM2_HUMAN	no	4685	NCAM2	1	9	1	1	0	yes
Human	O43570	1 - high confidence	Carbonic anhydrase 12	CAH12_HUMAN	no	771	CA12	1	8	1	1	0	yes
Human	O60330	1 - high confidence	Protocadherin gamma-A12	PCDGC_HUMAN	no	26025	PCDHGA12	1	2	1	1	0	yes
Human	O60462	1 - high confidence	Neuropilin-2	NRP2_HUMAN	no	8828	NRP2	1	18	1	1	0	yes
Human	O75054	1 - high confidence	Immunoglobulin superfamily member 3	IGSF3_HUMAN	no	3321	IGSF3	1	24	1	1	0	yes
Human	O75096	1 - high confidence	Low-density lipoprotein receptor-related protein 4	LRP4_HUMAN	no	4038	LRP4	1	6	1	1	0	yes
Human	O75976	1 - high confidence	Carboxypeptidase D	CBPD_HUMAN	no	1362	CPD	1	18	1	1	0	yes
Human	O94856	1 - high confidence	Neurofascin	NFASC_HUMAN	no	23114	NFASC	1	8	1	1	0	yes
Human	O95185	1 - high confidence	Netrin receptor UNC5C	UNC5C_HUMAN	no	8633	UNC5C	1	6	1	1	0	yes
Human	O95196	1 - high confidence	Chondroitin sulfate proteoglycan 5	CSPG5_HUMAN	no	10675	CSPG5	1	15	1	1	0	yes
Human	O95274	1 - high confidence	Ly6/PLAUR domain-containing protein 3	LYPD3_HUMAN	no	27076	LYPD3	1	7	1	1	1	yes
Human	O95297	1 - high confidence	Myelin protein zero-like protein 1	MPZL1_HUMAN	no	9019	MPZL1	1	46	1	1	0	yes
Human	O95498	1 - high confidence	Vascular non-inflammatory molecule 2	VNN2_HUMAN	no	8875	VNN2	1	6	1	1	1	yes
Human	O95866	1 - high confidence	Protein G6b	G6B_HUMAN	no	80739	G6B	1	3	1	1	0	yes
Human	P00533	1 - high confidence	Epidermal growth factor receptor	EGFR_HUMAN	no	1956	EGFR	1	27	1	1	0	yes
Human	P01130	1 - high confidence	Low-density lipoprotein receptor	LDLR_HUMAN	no	3949	LDLR	1	4	1	1	0	yes
Human	P01889	1 - high confidence	HLA class I histocompatibility antigen, B-7 alpha chain	1B07_HUMAN	no	3106	HLA-B	1	8	1	1	0	yes
Human	P01891	1 - high confidence	HLA class I histocompatibility antigen, A-68 alpha chain	1A68_HUMAN	no	3105	HLA-A	1	19	1	1	0	yes
Human	P01892	1 - high confidence	HLA class I histocompatibility antigen, A-2 alpha chain	1A02_HUMAN	no	3105	HLA-A	1	21	1	1	0	yes
Human	P01903	1 - high confidence	HLA class II histocompatibility antigen, DR alpha chain	2DRA_HUMAN	no	3122	HLA-DRA	1	18	1	1	0	yes
Human	P01906	1 - high confidence	HLA class II histocompatibility antigen, DQ alpha 2 chain	2DA2_HUMAN	no	3118	HLA-DQA2	1	1	1	1	0	yes
Human	P01909	1 - high confidence	HLA class II histocompatibility antigen, DQ alpha 1 chain	2DA1_HUMAN	no	3117	HLA-DQA1	1	3	1	1	0	yes
Human	P01911	1 - high confidence	HLA class II histocompatibility antigen, DRB1-15 beta chain	2B1F_HUMAN	no	3123	HLA-DRB1	1	4	1	1	0	yes
Human	P01912	1 - high confidence	HLA class II histocompatibility antigen, DRB1-3 chain	HB2B_HUMAN	no	3123	HLA-DRB1	1	12	1	1	0	yes
Human	P01920	1 - high confidence	HLA class II histocompatibility antigen, DQ beta 1 chain	DQB1_HUMAN	no	3119	HLA-DQB1	1	10	1	1	0	yes
Human	P03989	1 - high confidence	HLA class I histocompatibility antigen, B-27 alpha chain	1B27_HUMAN	no	3106	HLA-B	1	9	1	1	0	yes
Human	P04222	1 - high confidence	HLA class I histocompatibility antigen, Cw-3 alpha chain	1C03_HUMAN	no	3107	HLA-C	1	21	1	1	0	yes
Human	P04229	1 - high confidence	HLA class II histocompatibility antigen, DRB1-1 beta chain	2B11_HUMAN	no	3123	HLA-DRB1	1	3	1	1	0	yes
Human	P04439	1 - high confidence	HLA class I histocompatibility antigen, A-3 alpha chain	1A03_HUMAN	no	3105	HLA-A	1	10	1	1	0	yes
Human	P04440	1 - high confidence	HLA class II histocompatibility antigen, DP beta 1 chain	DPB1_HUMAN	no	3115	HLA-DPB1	1	18	1	1	0	yes
Human	P04629	1 - high confidence	High affinity nerve growth factor receptor	NTRK1_HUMAN	no	4914	NTRK1	1	5	1	1	0	yes
Human	P05026	1 - high confidence	Sodium/potassium-transporting ATPase subunit beta-1	AT1B1_HUMAN	no	481	ATP1B1	1	40	1	1	0	yes
Human	P05534	1 - high confidence	HLA class I histocompatibility antigen, A-24 alpha chain	1A24_HUMAN	no	3105	HLA-A	1	11	1	1	0	yes
Human	P08581	1 - high confidence	Hepatocyte growth factor receptor	MET_HUMAN	no	4233	MET	1	18	1	1	0	yes
Human	P09758	1 - high confidence	Tumor-associated calcium signal transducer 2	TACD2_HUMAN	no	4070	TACSTD2	1	3	1	1	0	yes
Human	P0C7U0	1 - high confidence	Extracellular leucine-rich repeat and fibronectin type-III domain-containing protein 1	ELFN1_HUMAN	no	392617	ELFN1	1	9	1	1	0	yes
Human	P10314	1 - high confidence	HLA class I histocompatibility antigen, A-32 alpha chain	1A32_HUMAN	no	3105	HLA-A	1	1	1	1	0	yes
Human	P10316	1 - high confidence	HLA class I histocompatibility antigen, A-69 alpha chain	1A69_HUMAN	no	3105	HLA-A	1	1	1	1	0	yes
Human	P10321	1 - high confidence	HLA class I histocompatibility antigen, Cw-7 alpha chain	1C07_HUMAN	no	3107	HLA-C	1	5	1	1	0	yes
Human	P10586	1 - high confidence	Receptor-type tyrosine-protein phosphatase F	PTPRF_HUMAN	no	5792	PTPRF	1	28	1	1	0	yes
Human	P13746	1 - high confidence	HLA class I histocompatibility antigen, A-11 alpha chain	1A11_HUMAN	no	3105	HLA-A	1	11	1	1	0	yes
Human	P13747	1 - high confidence	HLA class I histocompatibility antigen, alpha chain E	HLAE_HUMAN	no	3133	HLA-E	1	4	1	1	0	yes
Human	P13760	1 - high confidence	HLA class II histocompatibility antigen, DRB1-4 beta chain	2B14_HUMAN	no	3123	HLA-DRB1	1	7	1	1	0	yes
Human	P13762	1 - high confidence	HLA class II histocompatibility antigen, DR beta 4 chain	DRB4_HUMAN	no	3126	HLA-DRB4	1	5	1	1	0	yes
Human	P14384	1 - high confidence	Carboxypeptidase M	CBPM_HUMAN	no	1368	CPM	1	22	1	1	1	yes
Human	P14415	1 - high confidence	Sodium/potassium-transporting ATPase subunit beta-2	AT1B2_HUMAN	no	482	ATP1B2	1	7	1	1	0	yes
Human	P14679	1 - high confidence	Tyrosinase	TYRO_HUMAN	no	7299	TYR	1	2	1	1	0	yes
Human	P15328	1 - high confidence	Folate receptor alpha	FOLR1_HUMAN	no	2348	FOLR1	1	9	1	1	1	yes
Human	P16066	1 - high confidence	Atrial natriuretic peptide receptor 1	ANPRA_HUMAN	no	4881	NPR1	1	1	1	1	0	yes
Human	P16188	1 - high confidence	HLA class I histocompatibility antigen, A-30 alpha chain	1A30_HUMAN	no	3105	HLA-A	1	1	1	1	0	yes
Human	P16444	1 - high confidence	Dipeptidase 1	DPEP1_HUMAN	no	1800	DPEP1	1	4	1	1	1	yes
Human	P17181	1 - high confidence	Interferon alpha/beta receptor 1	INAR1_HUMAN	no	3454	IFNAR1	1	32	1	1	0	yes
Human	P17643	1 - high confidence	5,6-dihydroxyindole-2-carboxylic acid oxidase	TYRP1_HUMAN	no	7306	TYRP1	1	2	1	1	0	yes
Human	P18084	1 - high confidence	Integrin beta-5	ITB5_HUMAN	no	3693	ITGB5	1	20	1	1	0	yes
Human	P18433	1 - high confidence	Receptor-type tyrosine-protein phosphatase alpha	PTPRA_HUMAN	no	5786	PTPRA	1	1	1	1	0	yes
Human	P18462	1 - high confidence	HLA class I histocompatibility antigen, A-25 alpha chain	1A25_HUMAN	no	3105	HLA-A	1	5	1	1	0	yes
Human	P18464	1 - high confidence	HLA class I histocompatibility antigen, B-51 alpha chain	1B51_HUMAN	no	3106	HLA-B	1	4	1	1	0	yes
Human	P18564	1 - high confidence	Integrin beta-6	ITB6_HUMAN	no	3694	ITGB6	1	2	1	1	0	yes
Human	P20036	1 - high confidence	HLA class II histocompatibility antigen, DP alpha 1 chain	DPA1_HUMAN	no	3113	HLA-DPA1	1	23	1	1	0	yes
Human	P20039	1 - high confidence	HLA class II histocompatibility antigen, DRB1-11 beta chain	2B1B_HUMAN	no	3123	HLA-DRB1	1	4	1	1	0	yes
Human	P21709	1 - high confidence	Ephrin type-A receptor 1	EPHA1_HUMAN	no	2041	EPHA1	1	2	1	1	0	yes
Human	P21860	1 - high confidence	Receptor tyrosine-protein kinase erbB-3	ERBB3_HUMAN	no	2065	ERBB3	1	7	1	1	0	yes
Human	P22413	1 - high confidence	Ectonucleotide pyrophosphatase/phosphodiesterase family member 1	ENPP1_HUMAN	no	5167	ENPP1	1	20	1	1	0	yes
Human	P23467	1 - high confidence	Receptor-type tyrosine-protein phosphatase beta	PTPRB_HUMAN	no	5787	PTPRB	1	3	1	1	0	yes
Human	P23471	1 - high confidence	Receptor-type tyrosine-protein phosphatase zeta	PTPRZ_HUMAN	no	5803	PTPRZ1	1	5	1	1	0	yes
Human	P25189	1 - high confidence	Myelin protein P0	MYP0_HUMAN	no	4359	MPZ	1	3	1	1	0	yes
Human	P26012	1 - high confidence	Integrin beta-8	ITB8_HUMAN	no	3696	ITGB8	1	10	1	1	0	yes
Human	P26992	1 - high confidence	Ciliary neurotrophic factor receptor subunit alpha	CNTFR_HUMAN	no	1271	CNTFR	1	3	1	1	1	yes
Human	P27037	1 - high confidence	Activin receptor type-2A	AVR2A_HUMAN	no	92	ACVR2A	1	5	1	1	0	yes
Human	P28827	1 - high confidence	Receptor-type tyrosine-protein phosphatase mu	PTPRM_HUMAN	no	5797	PTPRM	1	18	1	1	0	yes
Human	P29317	1 - high confidence	Ephrin type-A receptor 2	EPHA2_HUMAN	no	1969	EPHA2	1	26	1	1	0	yes
Human	P29320	1 - high confidence	Ephrin type-A receptor 3	EPHA3_HUMAN	no	2042	EPHA3	1	6	1	1	0	yes
Human	P29323	1 - high confidence	Ephrin type-B receptor 2	EPHB2_HUMAN	no	2048	EPHB2	1	28	1	1	0	yes
Human	P30450	1 - high confidence	HLA class I histocompatibility antigen, A-26 alpha chain	1A26_HUMAN	no	3105	HLA-A	1	30	1	1	0	yes
Human	P30453	1 - high confidence	HLA class I histocompatibility antigen, A-34 alpha chain	1A34_HUMAN	no	3105	HLA-A	1	1	1	1	0	yes
Human	P30459	1 - high confidence	HLA class I histocompatibility antigen, A-74 alpha chain	1A74_HUMAN	no	3105	HLA-A	1	6	1	1	0	yes
Human	P30460	1 - high confidence	HLA class I histocompatibility antigen, B-8 alpha chain	1B08_HUMAN	no	3106	HLA-B	1	2	1	1	0	yes
Human	P30462	1 - high confidence	HLA class I histocompatibility antigen, B-14 alpha chain	1B14_HUMAN	no	3106	HLA-B	1	4	1	1	0	yes
Human	P30464	1 - high confidence	HLA class I histocompatibility antigen, B-15 alpha chain	1B15_HUMAN	no	3106	HLA-B	1	19	1	1	0	yes
Human	P30479	1 - high confidence	HLA class I histocompatibility antigen, B-41 alpha chain	1B41_HUMAN	no	3106	HLA-B	1	5	1	1	0	yes
Human	P30481	1 - high confidence	HLA class I histocompatibility antigen, B-44 alpha chain	1B44_HUMAN	no	3106	HLA-B	1	7	1	1	0	yes
Human	P30483	1 - high confidence	HLA class I histocompatibility antigen, B-45 alpha chain	1B45_HUMAN	no	3106	HLA-B	1	1	1	1	0	yes
Human	P30485	1 - high confidence	HLA class I histocompatibility antigen, B-47 alpha chain	1B47_HUMAN	no	3106	HLA-B	1	3	1	1	0	yes
Human	P30487	1 - high confidence	HLA class I histocompatibility antigen, B-49 alpha chain	1B49_HUMAN	no	3106	HLA-B	1	2	1	1	0	yes
Human	P30498	1 - high confidence	HLA class I histocompatibility antigen, B-78 alpha chain	1B78_HUMAN	no	3106	HLA-B	1	3	1	1	0	yes
Human	P30508	1 - high confidence	HLA class I histocompatibility antigen, Cw-12 alpha chain	1C12_HUMAN	no	3107	HLA-C	1	2	1	1	0	yes
Human	P30510	1 - high confidence	HLA class I histocompatibility antigen, Cw-14 alpha chain	1C14_HUMAN	no	3107	HLA-C	1	2	1	1	0	yes
Human	P30511	1 - high confidence	HLA class I histocompatibility antigen, alpha chain F	HLAF_HUMAN	no	3134	HLA-F	1	7	1	1	0	yes
Human	P30512	1 - high confidence	HLA class I histocompatibility antigen, A-29 alpha chain	1A29_HUMAN	no	3105	HLA-A	1	2	1	1	0	yes
Human	P30530	1 - high confidence	Tyrosine-protein kinase receptor UFO	UFO_HUMAN	no	558	AXL	1	22	1	1	0	yes
Human	P30685	1 - high confidence	HLA class I histocompatibility antigen, B-35 alpha chain	1B35_HUMAN	no	3106	HLA-B	1	6	1	1	0	yes
Human	P34925	1 - high confidence	Tyrosine-protein kinase RYK	RYK_HUMAN	no	6259	RYK	1	10	1	1	0	yes
Human	P35052	1 - high confidence	Glypican-1 [Cleaved into: Secreted glypican-1]	GPC1_HUMAN	no	2817	GPC1	1	28	1	1	1	yes
Human	P37173	1 - high confidence	TGF-beta receptor type-2	TGFR2_HUMAN	no	7048	TGFBR2	1	11	1	1	0	yes
Human	P42892	1 - high confidence	Endothelin-converting enzyme 1	ECE1_HUMAN	no	1889	ECE1	1	40	1	1	0	yes
Human	P51693	1 - high confidence	Amyloid-like protein 1	APLP1_HUMAN	no	333	APLP1	1	6	1	1	0	yes
Human	P51805	1 - high confidence	Plexin-A3	PLXA3_HUMAN	no	55558	PLXNA3	1	3	1	1	0	yes
Human	P52798	1 - high confidence	Ephrin-A4	EFNA4_HUMAN	no	1945	EFNA4	1	6	1	1	1	yes
Human	P52799	1 - high confidence	Ephrin-B2	EFNB2_HUMAN	no	1948	EFNB2	1	6	1	1	0	yes
Human	P53708	1 - high confidence	Integrin alpha-8 [Cleaved into: Integrin alpha-8 heavy chain; Integrin alpha-8 light chain]	ITA8_HUMAN	no	8516	ITGA8	1	3	1	1	0	yes
Human	P54289	1 - high confidence	Voltage-dependent calcium channel subunit alpha-2/delta-1	CA2D1_HUMAN	no	781	CACNA2D1	1	23	1	1	0	yes
Human	P54760	1 - high confidence	Ephrin type-B receptor 4	EPHB4_HUMAN	no	2050	EPHB4	1	17	1	1	0	yes
Human	P54762	1 - high confidence	Ephrin type-B receptor 1	EPHB1_HUMAN	no	2047	EPHB1	1	8	1	1	0	yes
Human	P55082	1 - high confidence	Microfibril-associated glycoprotein 3	MFAP3_HUMAN	no	4238	MFAP3	1	4	1	1	0	yes
Human	P55285	1 - high confidence	Cadherin-6	CADH6_HUMAN	no	1004	CDH6	1	11	1	1	0	yes
Human	P55291	1 - high confidence	Cadherin-15	CAD15_HUMAN	no	1013	CDH15	1	3	1	1	0	yes
Human	P56159	1 - high confidence	GDNF family receptor alpha-1	GFRA1_HUMAN	no	2674	GFRA1	1	10	1	1	1	yes
Human	P69849	1 - high confidence	Nodal modulator 3	NOMO3_HUMAN	no	408050	NOMO3	1	23	1	1	0	yes
Human	P78310	1 - high confidence	Coxsackievirus and adenovirus receptor	CXAR_HUMAN	no	1525	CXADR	1	3	1	1	0	yes
Human	P78357	1 - high confidence	Contactin-associated protein 1	CNTP1_HUMAN	no	8506	CNTNAP1	1	16	1	1	0	yes
Human	P79483	1 - high confidence	HLA class II histocompatibility antigen, DR beta 3 chain	DRB3_HUMAN	no	3125	HLA-DRB3	1	7	1	1	0	yes
Human	P98172	1 - high confidence	Ephrin-B1	EFNB1_HUMAN	no	1947	EFNB1	1	13	1	1	0	yes
Human	Q01974	1 - high confidence	Tyrosine-protein kinase transmembrane receptor ROR2	ROR2_HUMAN	no	4920	ROR2	1	7	1	1	0	yes
Human	Q04771	1 - high confidence	Activin receptor type-1	ACVR1_HUMAN	no	90	ACVR1	1	8	1	1	0	yes
Human	Q06418	1 - high confidence	Tyrosine-protein kinase receptor TYRO3	TYRO3_HUMAN	no	7301	TYRO3	1	17	1	1	0	yes
Human	Q06481	1 - high confidence	Amyloid-like protein 2	APLP2_HUMAN	no	334	APLP2	1	20	1	1	0	yes
Human	Q09160	1 - high confidence	HLA class I histocompatibility antigen, A-80 alpha chain	1A80_HUMAN	no	3105	HLA-A	1	2	1	1	0	yes
Human	Q12860	1 - high confidence	Contactin-1	CNTN1_HUMAN	no	1272	CNTN1	1	8	1	1	1	yes
Human	Q12864	1 - high confidence	Cadherin-17	CAD17_HUMAN	no	1015	CDH17	1	1	1	1	0	yes
Human	Q12866	1 - high confidence	Tyrosine-protein kinase Mer	MERTK_HUMAN	no	10461	MERTK	1	11	1	1	0	yes
Human	Q13308	1 - high confidence	Tyrosine-protein kinase-like 7	PTK7_HUMAN	no	5754	PTK7	1	32	1	1	0	yes
Human	Q13332	1 - high confidence	Receptor-type tyrosine-protein phosphatase S	PTPRS_HUMAN	no	5802	PTPRS	1	20	1	1	0	yes
Human	Q13444	1 - high confidence	Disintegrin and metalloproteinase domain-containing protein 15	ADA15_HUMAN	no	8751	ADAM15	1	21	1	1	0	yes
Human	Q13449	1 - high confidence	Limbic system-associated membrane protein	LSAMP_HUMAN	no	4045	LSAMP	1	16	1	1	1	yes
Human	Q13586	1 - high confidence	Stromal interaction molecule 1	STIM1_HUMAN	no	6786	STIM1	1	18	1	1	0	yes
Human	Q13641	1 - high confidence	Trophoblast glycoprotein	TPBG_HUMAN	no	7162	TPBG	1	27	1	1	0	yes
Human	Q13683	1 - high confidence	Integrin alpha-7 [Cleaved into: Integrin alpha-7 heavy chain; Integrin alpha-7 light chain]	ITA7_HUMAN	no	3679	ITGA7	1	9	1	1	0	yes
Human	Q13797	1 - high confidence	Integrin alpha-9	ITA9_HUMAN	no	3680	ITGA9	1	9	1	1	0	yes
Human	Q13873	1 - high confidence	Bone morphogenetic protein receptor type-2	BMPR2_HUMAN	no	659	BMPR2	1	15	1	1	0	yes
Human	Q14118	1 - high confidence	Dystroglycan	DAG1_HUMAN	no	1605	DAG1	1	25	1	1	0	yes
Human	Q14126	1 - high confidence	Desmoglein-2	DSG2_HUMAN	no	1829	DSG2	1	27	1	1	0	yes
Human	Q14392	1 - high confidence	Leucine-rich repeat-containing protein 32	LRC32_HUMAN	no	2615	LRRC32	1	3	1	1	0	yes
Human	Q14517	1 - high confidence	Protocadherin Fat 1	FAT1_HUMAN	no	2195	FAT1	1	21	1	1	0	yes
Human	Q14956	1 - high confidence	Transmembrane glycoprotein NMB	GPNMB_HUMAN	no	10457	GPNMB	1	8	1	1	0	yes
Human	Q15262	1 - high confidence	Receptor-type tyrosine-protein phosphatase kappa	PTPRK_HUMAN	no	5796	PTPRK	1	17	1	1	0	yes
Human	Q15768	1 - high confidence	Ephrin-B3	EFNB3_HUMAN	no	1949	EFNB3	1	7	1	1	0	yes
Human	Q16620	1 - high confidence	BDNF/NT-3 growth factors receptor	NTRK2_HUMAN	no	4915	NTRK2	1	5	1	1	0	yes
Human	Q29980	1 - high confidence	MHC class I polypeptide-related sequence B	MICB_HUMAN	no	4277	MICB	1	10	1	1	0	yes
Human	Q29983	1 - high confidence	MHC class I polypeptide-related sequence A	MICA_HUMAN	no	4276	MICA	1	32	1	1	0	yes
Human	Q30134	1 - high confidence	HLA class II histocompatibility antigen, DRB1-8 beta chain	2B18_HUMAN	no	3123	HLA-DRB1	1	5	1	1	0	yes
Human	Q30154	1 - high confidence	HLA class II histocompatibility antigen, DR beta 5 chain	DRB5_HUMAN	no	3127	HLA-DRB5	1	5	1	1	0	yes
Human	Q3ZCQ3	1 - high confidence	Membrane protein FAM174B	F174B_HUMAN	no	400451	FAM174B	1	12	1	1	0	yes
Human	Q495A1	1 - high confidence	T cell immunoreceptor with Ig and ITIM domains	TIGIT_HUMAN	no	201633	TIGIT	1	3	1	1	0	yes
Human	Q58EX2	1 - high confidence	Protein sidekick-2	SDK2_HUMAN	no	54549	SDK2	1	9	1	1	0	yes
Human	Q5IJ48	1 - high confidence	Crumbs homolog 2	CRUM2_HUMAN	no	286204	CRB2	1	3	1	1	0	yes
Human	Q5R3F8	1 - high confidence	Leucine-rich repeat and fibronectin type-III domain-containing protein 6	LRFN6_HUMAN	no	114794	ELFN2	1	16	1	1	0	yes
Human	Q5SZK8	1 - high confidence	FRAS1-related extracellular matrix protein 2	FREM2_HUMAN	no	341640	FREM2	1	6	1	1	0	yes
Human	Q68D85	1 - high confidence	Putative Ig-like domain-containing protein DKFZp686O24166/DKFZp686I21167	YK047_HUMAN	no	374383	0	1	14	1	1	0	yes
Human	Q6DN72	1 - high confidence	Fc receptor-like protein 6	FCRL6_HUMAN	no	343413	FCRL6	1	1	1	1	0	yes
Human	Q6H3X3	1 - high confidence	Retinoic acid early transcript 1G protein	RET1G_HUMAN	no	353091	RAET1G	1	18	1	1	0	yes
Human	Q6IEE7	1 - high confidence	Transmembrane protein 132E	T132E_HUMAN	no	124842	TMEM132E	1	1	1	1	0	yes
Human	Q6PCB8	1 - high confidence	Embigin	EMB_HUMAN	no	133418	EMB	1	30	1	1	0	yes
Human	Q6UVK1	1 - high confidence	Chondroitin sulfate proteoglycan 4	CSPG4_HUMAN	no	1464	CSPG4	1	21	1	1	0	yes
Human	Q6UW56	1 - high confidence	Apoptosis-related protein 3	APR3_HUMAN	no	51374	APR3	1	11	1	1	0	yes
Human	Q6UWB1	1 - high confidence	Interleukin-27 receptor subunit alpha	I27RA_HUMAN	no	9466	IL27RA	1	10	1	1	0	yes
Human	Q6UWL2	1 - high confidence	Sushi domain-containing protein 1	SUSD1_HUMAN	no	64420	SUSD1	1	4	1	1	0	yes
Human	Q6UX27	1 - high confidence	V-set and transmembrane domain-containing protein 1	VSTM1_HUMAN	no	284415	VSTM1	1	1	1	1	0	yes
Human	Q6UXB8	1 - high confidence	Peptidase inhibitor 16	PI16_HUMAN	no	221476	PI16	1	3	1	1	0	yes
Human	Q6UXD5	1 - high confidence	Seizure 6-like protein 2	SE6L2_HUMAN	no	26470	SEZ6L2	1	16	1	1	0	yes
Human	Q6V0I7	1 - high confidence	Protocadherin Fat 4	FAT4_HUMAN	no	79633	FAT4	1	10	1	1	0	yes
Human	Q6ZN44	1 - high confidence	Netrin receptor UNC5A	UNC5A_HUMAN	no	90249	UNC5A	1	2	1	1	0	yes
Human	Q6ZRP7	1 - high confidence	Sulfhydryl oxidase 2	QSOX2_HUMAN	no	169714	QSOX2	1	7	1	1	0	yes
Human	Q7KYR7	1 - high confidence	Butyrophilin subfamily 2 member A1	BT2A1_HUMAN	no	11120	BTN2A1	1	33	1	1	0	yes
Human	Q7Z5N4	1 - high confidence	Protein sidekick-1	SDK1_HUMAN	no	221935	SDK1	1	14	1	1	0	yes
Human	Q7Z6M3	1 - high confidence	Probable mast cell antigen 32 homolog	MCA32_HUMAN	no	284021	MCA32	1	20	1	1	0	yes
Human	Q86SJ2	1 - high confidence	Amphoterin-induced protein 2	AMGO2_HUMAN	no	347902	AMIGO2	1	11	1	1	0	yes
Human	Q86T13	1 - high confidence	C-type lectin domain family 14 member A	CLC14_HUMAN	no	161198	CLEC14A	1	2	1	1	0	yes
Human	Q86XX4	1 - high confidence	Extracellular matrix protein FRAS1	FRAS1_HUMAN	no	80144	FRAS1	1	2	1	1	0	yes
Human	Q86YT9	1 - high confidence	Junctional adhesion molecule-like	JAML1_HUMAN	no	120425	AMICA1	1	2	1	1	0	yes
Human	Q8IW52	1 - high confidence	SLIT and NTRK-like protein 4	SLIK4_HUMAN	no	139065	SLITRK4	1	3	1	1	0	yes
Human	Q8IZJ1	1 - high confidence	Netrin receptor UNC5B	UNC5B_HUMAN	no	219699	UNC5B	1	4	1	1	0	yes
Human	Q8N0W4	1 - high confidence	Neuroligin-4, X-linked	NLGNX_HUMAN	no	57502	NLGN4X	1	3	1	1	0	yes
Human	Q8N0Z9	1 - high confidence	Ig-like domain-containing protein FLJ20674	YL020_HUMAN	no	54621	0	1	5	1	1	0	yes
Human	Q8N126	1 - high confidence	Cell adhesion molecule 3	CADM3_HUMAN	no	57863	CADM3	1	3	1	1	0	yes
Human	Q8N2Q7	1 - high confidence	Neuroligin-1	NLGN1_HUMAN	no	22871	NLGN1	1	7	1	1	0	yes
Human	Q8N441	1 - high confidence	Fibroblast growth factor receptor-like 1	FGRL1_HUMAN	no	53834	FGFRL1	1	26	1	1	0	yes
Human	Q8N6Y1	1 - high confidence	Protocadherin-20	PCD20_HUMAN	no	64881	PCDH20	1	3	1	1	0	yes
Human	Q8NC42	1 - high confidence	E3 ubiquitin-protein ligase RNF149	RN149_HUMAN	no	284996	RNF149	1	8	1	1	0	yes
Human	Q8NFT8	1 - high confidence	Delta and Notch-like epidermal growth factor-related receptor	DNER_HUMAN	no	92737	DNER	1	1	1	1	0	yes
Human	Q8NFZ8	1 - high confidence	Cell adhesion molecule 4	CADM4_HUMAN	no	199731	CADM4	1	20	1	1	0	yes
Human	Q8TDY8	1 - high confidence	Immunoglobulin superfamily DCC subclass member 4	IGDC4_HUMAN	no	57722	IGDCC4	1	2	1	1	0	yes
Human	Q8TF66	1 - high confidence	Leucine-rich repeat-containing protein 15	LRC15_HUMAN	no	131578	LRRC15	1	7	1	1	0	yes
Human	Q8WTV0	1 - high confidence	Scavenger receptor class B member 1	SCRB1_HUMAN	no	949	SCARB1	1	31	1	1	0	yes
Human	Q8WXI7	1 - high confidence	Mucin-16	MUC16_HUMAN	no	94025	MUC16	1	5	1	1	0	yes
Human	Q92542	1 - high confidence	Nicastrin	NICA_HUMAN	no	23385	NCSTN	1	33	1	1	0	yes
Human	Q92673	1 - high confidence	Sortilin-related receptor	SORL_HUMAN	no	6653	SORL1	1	12	1	1	0	yes
Human	Q92823	1 - high confidence	Neuronal cell adhesion molecule	NRCAM_HUMAN	no	4897	NRCAM	1	16	1	1	0	yes
Human	Q92859	1 - high confidence	Neogenin	NEO1_HUMAN	no	4756	NEO1	1	36	1	1	0	yes
Human	Q95365	1 - high confidence	HLA class I histocompatibility antigen, B-38 alpha chain	1B38_HUMAN	no	0	HLA-B	1	2	1	1	0	yes
Human	Q95IE3	1 - high confidence	HLA class II histocompatibility antigen, DRB1-12 beta chain	2B1C_HUMAN	no	3123	HLA-DRB1	1	6	1	1	0	yes
Human	Q96BF3	1 - high confidence	Transmembrane and immunoglobulin domain-containing protein 2	TMIG2_HUMAN	no	126259	TMIGD2	1	2	1	1	0	yes
Human	Q96DU3	1 - high confidence	SLAM family member 6	SLAF6_HUMAN	no	114836	SLAMF6	1	10	1	1	0	yes
Human	Q96GP6	1 - high confidence	Scavenger receptor class F member 2	SREC2_HUMAN	no	91179	SCARF2	1	4	1	1	0	yes
Human	Q96HA4	1 - high confidence	Uncharacterized protein C1orf159	CA159_HUMAN	no	54991	C1orf159	1	32	1	1	0	yes
Human	Q96J84	1 - high confidence	Kin of IRRE-like protein 1	KIRR1_HUMAN	no	55243	KIRREL	1	27	1	1	0	yes
Human	Q96JQ0	1 - high confidence	Protocadherin-16	PCD16_HUMAN	no	8642	DCHS1	1	5	1	1	0	yes
Human	Q96LA5	1 - high confidence	Fc receptor-like protein 2	FCRL2_HUMAN	no	79368	FCRL2	1	2	1	1	0	yes
Human	Q96LC7	1 - high confidence	Sialic acid-binding Ig-like lectin 10	SIG10_HUMAN	no	89790	SIGLEC10	1	1	1	1	0	yes
Human	Q96LD1	1 - high confidence	Zeta-sarcoglycan	SGCZ_HUMAN	no	137868	SGCZ	1	2	1	1	0	yes
Human	Q96P31	1 - high confidence	Fc receptor-like protein 3	FCRL3_HUMAN	no	115352	FCRL3	1	4	1	1	0	yes
Human	Q96PQ0	1 - high confidence	VPS10 domain-containing receptor SorCS2	SORC2_HUMAN	no	57537	SORCS2	1	3	1	1	0	yes
Human	Q96PQ1	1 - high confidence	Sialic acid-binding Ig-like lectin 12	SIG12_HUMAN	no	89858	SIGLEC12	1	1	1	1	0	yes
Human	Q96QU1	1 - high confidence	Protocadherin-15	PCD15_HUMAN	no	65217	PCDH15	1	1	1	1	0	yes
Human	Q99102	1 - high confidence	Mucin-4	MUC4_HUMAN	no	4585	MUC4	1	2	1	1	0	yes
Human	Q99523	1 - high confidence	Sortilin	SORT_HUMAN	no	6272	SORT1	1	25	1	1	0	yes
Human	Q9BRK3	1 - high confidence	Matrix-remodeling-associated protein 8	MXRA8_HUMAN	no	54587	MXRA8	1	6	1	1	0	yes
Human	Q9BX67	1 - high confidence	Junctional adhesion molecule C	JAM3_HUMAN	no	83700	JAM3	1	14	1	1	0	yes
Human	Q9BX97	1 - high confidence	Plasmalemma vesicle-associated protein	PLVAP_HUMAN	no	83483	PLVAP	1	2	1	1	0	yes
Human	Q9BY67	1 - high confidence	Cell adhesion molecule 1	CADM1_HUMAN	no	23705	CADM1	1	32	1	1	0	yes
Human	Q9C0C4	1 - high confidence	Semaphorin-4C	SEM4C_HUMAN	no	54910	SEMA4C	1	14	1	1	0	yes
Human	Q9H159	1 - high confidence	Cadherin-19	CAD19_HUMAN	no	28513	CDH19	1	4	1	1	0	yes
Human	Q9H1E5	1 - high confidence	Thioredoxin-related transmembrane protein 4	TMX4_HUMAN	no	56255	TMX4	1	1	1	1	0	yes
Human	Q9H2A7	1 - high confidence	C-X-C motif chemokine 16	CXL16_HUMAN	no	58191	CXCL16	1	12	1	1	0	yes
Human	Q9H3S1	1 - high confidence	Semaphorin-4A	SEM4A_HUMAN	no	64218	SEMA4A	1	5	1	1	0	yes
Human	Q9H3S3	1 - high confidence	Transmembrane protease serine 5	TMPS5_HUMAN	no	80975	TMPRSS5	1	1	1	1	0	yes
Human	Q9H5Y7	1 - high confidence	SLIT and NTRK-like protein 6	SLIK6_HUMAN	no	84189	SLITRK6	1	5	1	1	0	yes
Human	Q9H6B4	1 - high confidence	Adipocyte adhesion molecule	ACAM_HUMAN	no	79827	ACAM	1	22	1	1	0	yes
Human	Q9H6X2	1 - high confidence	Anthrax toxin receptor 1	ANTR1_HUMAN	no	84168	ANTXR1	1	29	1	1	0	yes
Human	Q9H7M9	1 - high confidence	Platelet receptor Gi24	GI24_HUMAN	no	64115	C10orf54	1	6	1	1	0	yes
Human	Q9HC56	1 - high confidence	Protocadherin-9	PCDH9_HUMAN	no	5101	PCDH9	1	14	1	1	0	yes
Human	Q9HC73	1 - high confidence	Cytokine receptor-like factor 2	CRLF2_HUMAN	no	64109	CRLF2	1	5	1	1	0	yes
Human	Q9HCL0	1 - high confidence	Protocadherin-18	PCD18_HUMAN	no	54510	PCDH18	1	5	1	1	0	yes
Human	Q9HCM2	1 - high confidence	Plexin-A4	PLXA4_HUMAN	no	91584	PLXNA4	1	1	1	1	0	yes
Human	Q9NPH3	1 - high confidence	Interleukin-1 receptor accessory protein	IL1AP_HUMAN	no	3556	IL1RAP	1	16	1	1	0	yes
Human	Q9NPR2	1 - high confidence	Semaphorin-4B	SEM4B_HUMAN	no	10509	SEMA4B	1	14	1	1	0	yes
Human	Q9NT68	1 - high confidence	Teneurin-2	TEN2_HUMAN	no	57451	ODZ2	1	13	1	1	0	yes
Human	Q9NTN9	1 - high confidence	Semaphorin-4G	SEM4G_HUMAN	no	57715	SEMA4G	1	1	1	1	0	yes
Human	Q9NY15	1 - high confidence	Stabilin-1	STAB1_HUMAN	no	23166	STAB1	1	2	1	1	0	yes
Human	Q9NY25	1 - high confidence	C-type lectin domain family 5 member A	CLC5A_HUMAN	no	23601	CLEC5A	1	1	1	1	0	yes
Human	Q9NY47	1 - high confidence	Voltage-dependent calcium channel subunit alpha-2/delta-2	CA2D2_HUMAN	no	9254	CACNA2D2	1	7	1	1	0	yes
Human	Q9NZU1	1 - high confidence	Leucine-rich repeat transmembrane protein FLRT1	FLRT1_HUMAN	no	23769	FLRT1	1	2	1	1	0	yes
Human	Q9P0K1	1 - high confidence	Disintegrin and metalloproteinase domain-containing protein 22	ADA22_HUMAN	no	53616	ADAM22	1	12	1	1	0	yes
Human	Q9P232	1 - high confidence	Contactin-3	CNTN3_HUMAN	no	5067	CNTN3	1	2	1	1	1	yes
Human	Q9UBS9	1 - high confidence	Protein C1orf9	CA009_HUMAN	no	51430	C1orf9	1	7	1	1	0	yes
Human	Q9UGT4	1 - high confidence	Sushi domain-containing protein 2	SUSD2_HUMAN	no	56241	SUSD2	1	12	1	1	0	yes
Human	Q9UIQ6	1 - high confidence	Leucyl-cystinyl aminopeptidase	LCAP_HUMAN	no	4012	LNPEP	1	39	1	1	0	yes
Human	Q9UIW2	1 - high confidence	Plexin-A1	PLXA1_HUMAN	no	5361	PLXNA1	1	41	1	1	0	yes
Human	Q9UKJ1	1 - high confidence	Paired immunoglobulin-like type 2 receptor alpha	PILRA_HUMAN	no	29992	PILRA	1	3	1	1	0	yes
Human	Q9UKX5	1 - high confidence	Integrin alpha-11	ITA11_HUMAN	no	22801	ITGA11	1	4	1	1	0	yes
Human	Q9ULL4	1 - high confidence	Plexin-B3	PLXB3_HUMAN	no	5365	PLXNB3	1	6	1	1	0	yes
Human	Q9UM44	1 - high confidence	HERV-H LTR-associating protein 2	HHLA2_HUMAN	no	11148	HHLA2	1	2	1	1	0	yes
Human	Q9UMZ3	1 - high confidence	Phosphotidylinositol phosphatase PTPRQ	PTPRQ_HUMAN	no	374462	PTPRQ	1	2	1	1	0	yes
Human	Q9UN70	1 - high confidence	Protocadherin gamma-C3	PCDGK_HUMAN	no	5098	PCDHGC3	1	21	1	1	0	yes
Human	Q9UNG2	1 - high confidence	Tumor necrosis factor ligand superfamily member 18	TNF18_HUMAN	no	8995	TNFSF18	1	2	1	1	0	yes
Human	Q9UQC9	1 - high confidence	Calcium-activated chloride channel regulator 2	CLCA2_HUMAN	no	9635	CLCA2	1	2	1	1	0	yes
Human	Q9Y336	1 - high confidence	Sialic acid-binding Ig-like lectin 9	SIGL9_HUMAN	no	27180	SIGLEC9	1	2	1	1	0	yes
Human	Q9Y4D7	1 - high confidence	Plexin-D1	PLXD1_HUMAN	no	23129	PLXND1	1	25	1	1	0	yes
Human	Q9Y5F8	1 - high confidence	Protocadherin gamma-B7	PCDGJ_HUMAN	no	56099	PCDHGB7	1	2	1	1	0	yes
Human	Q9Y639	1 - high confidence	Neuroplastin	NPTN_HUMAN	no	27020	NPTN	1	46	1	1	0	yes
Human	Q9Y6N7	1 - high confidence	Roundabout homolog 1	ROBO1_HUMAN	no	6091	ROBO1	1	10	1	1	0	yes
Human	Q9Y6N8	1 - high confidence	Cadherin-10	CAD10_HUMAN	no	1008	CDH10	1	4	1	1	0	yes
Human	Q9Y6X5	1 - high confidence	Ectonucleotide pyrophosphatase/phosphodiesterase family member 4	ENPP4_HUMAN	no	22875	ENPP4	1	1	1	1	0	yes
Human	Q8IZP9	1 - high confidence	G-protein coupled receptor 64	GPR64_HUMAN	no	10149	GPR64	0.9999	3	1	8	0	yes
Human	Q8IYL9	1 - high confidence	Psychosine receptor	PSYR_HUMAN	no	8477	GPR65	0.9999	2	1	6	0	yes
Human	P18465	1 - high confidence	HLA class I histocompatibility antigen, B-57 alpha chain	1B57_HUMAN	no	3106	HLA-B	0.9999	5	1	1	0	yes
Human	P21583	1 - high confidence	Kit ligand	SCF_HUMAN	no	4254	KITLG	0.9999	6	1	1	0	yes
Human	Q04826	1 - high confidence	HLA class I histocompatibility antigen, B-40 alpha chain	1B40_HUMAN	no	3106	HLA-B	0.9999	2	1	1	0	yes
Human	Q01650	1 - high confidence	Large neutral amino acids transporter small subunit 1	LAT1_HUMAN	no	8140	SLC7A5	0.9998	5	1	12	0	yes
Human	Q99500	1 - high confidence	Sphingosine 1-phosphate receptor 3	S1PR3_HUMAN	no	1903	S1PR3	0.9998	7	1	7	0	yes
Human	P20594	1 - high confidence	Atrial natriuretic peptide receptor 2	ANPRB_HUMAN	no	4882	NPR2	0.9996	2	1	1	0	yes
Human	P30490	1 - high confidence	HLA class I histocompatibility antigen, B-52 alpha chain	1B52_HUMAN	no	3106	HLA-B	0.9995	1	1	1	0	yes
Human	Q8TD46	1 - high confidence	Cell surface glycoprotein CD200 receptor 1	MO2R1_HUMAN	no	131450	CD200R1	0.9995	8	1	1	0	yes
Human	P13761	1 - high confidence	HLA class II histocompatibility antigen, DRB1-7 beta chain	2B17_HUMAN	no	3123	HLA-DRB1	0.9993	2	1	1	0	yes
Human	Q9BZM5	1 - high confidence	NKG2D ligand 2	N2DL2_HUMAN	no	80328	ULBP2	0.9991	4	1	1	1	yes
Human	Q9UMF0	1 - high confidence	Intercellular adhesion molecule 5	ICAM5_HUMAN	no	7087	ICAM5	0.9991	29	1	1	0	yes
Human	Q5QGZ9	1 - high confidence	C-type lectin domain family 12 member A	CL12A_HUMAN	no	160364	CLEC12A	0.999	5	1	1	0	yes
Human	Q29960	1 - high confidence	HLA class I histocompatibility antigen, Cw-16 alpha chain	1C16_HUMAN	no	3107	HLA-C	0.9989	1	1	1	0	yes
Human	P30443	1 - high confidence	HLA class I histocompatibility antigen, A-1 alpha chain	1A01_HUMAN	no	3105	HLA-A	0.9983	4	1	1	0	yes
Human	Q5VUB5	1 - high confidence	Protein FAM171A1	F1711_HUMAN	no	221061	FAM171A1	0.9977	15	1	1	0	yes
Human	Q92959	1 - high confidence	Solute carrier organic anion transporter family member 2A1	SO2A1_HUMAN	no	6578	SLCO2A1	0.9972	2	1	12	0	yes
Human	P50052	1 - high confidence	Type-2 angiotensin II receptor	AGTR2_HUMAN	no	186	AGTR2	0.9972	2	1	7	0	yes
Human	Q9H6L2	1 - high confidence	UPF0513 transmembrane protein	U513_HUMAN	no	79583	UNQ870/PRO1886	0.9972	2	1	2	0	yes
Human	P23468	1 - high confidence	Receptor-type tyrosine-protein phosphatase delta	PTPRD_HUMAN	no	5789	PTPRD	0.9972	2	1	1	0	yes
Human	P98153	1 - high confidence	Integral membrane protein DGCR2/IDD	IDD_HUMAN	no	9993	DGCR2	0.9972	2	1	1	0	yes
Human	Q4KMG0	1 - high confidence	Cell adhesion molecule-related/down-regulated by oncogenes	CDON_HUMAN	no	50937	CDON	0.9972	1	1	1	0	yes
Human	Q6UXK5	1 - high confidence	Leucine-rich repeat neuronal protein 1	LRRN1_HUMAN	no	57633	LRRN1	0.9972	4	1	1	0	yes
Human	Q86WC4	1 - high confidence	Osteopetrosis-associated transmembrane protein 1	OSTM1_HUMAN	no	28962	OSTM1	0.9972	7	1	1	0	yes
Human	Q9UN73	1 - high confidence	Protocadherin alpha-6	PCDA6_HUMAN	no	56142	PCDHA6	0.9972	1	1	1	0	yes
Human	O14495	1 - high confidence	Lipid phosphate phosphohydrolase 3	LPP3_HUMAN	no	8613	PPAP2B	0.997	1	1	5	0	yes
Human	Q13443	1 - high confidence	Disintegrin and metalloproteinase domain-containing protein 9	ADAM9_HUMAN	no	8754	ADAM9	0.997	3	1	1	0	yes
Human	O95980	1 - high confidence	Reversion-inducing cysteine-rich protein with Kazal motifs	RECK_HUMAN	no	8434	RECK	0.9969	4	1	1	1	yes
Human	Q7L0X0	1 - high confidence	Leucine-rich repeat-containing protein KIAA0644	K0644_HUMAN	no	9865	KIAA0644	0.9969	1	1	1	0	yes
Human	Q8TDW7	1 - high confidence	Protocadherin Fat 3	FAT3_HUMAN	no	120114	FAT3	0.9969	4	1	1	0	yes
Human	Q8NE79	1 - high confidence	Blood vessel epicardial substance	POPD1_HUMAN	no	11149	BVES	0.9967	1	1	3	0	yes
Human	O75051	1 - high confidence	Plexin-A2	PLXA2_HUMAN	no	5362	PLXNA2	0.9967	5	1	1	0	yes
Human	P55283	1 - high confidence	Cadherin-4	CADH4_HUMAN	no	1002	CDH4	0.9967	8	1	1	0	yes
Human	Q8N386	1 - high confidence	Leucine-rich repeat-containing protein 25	LRC25_HUMAN	no	126364	LRRC25	0.9967	2	1	1	0	yes
Human	P54764	1 - high confidence	Ephrin type-A receptor 4	EPHA4_HUMAN	no	2043	EPHA4	0.9966	4	1	1	0	yes
Human	Q7Z4F1	1 - high confidence	Low-density lipoprotein receptor-related protein 10	LRP10_HUMAN	no	26020	LRP10	0.9964	8	1	1	0	yes
Human	Q9UN71	1 - high confidence	Protocadherin gamma-B4	PCDGG_HUMAN	no	8641	PCDHGB4	0.9963	11	1	1	0	yes
Human	Q9Y5G0	1 - high confidence	Protocadherin gamma-B5	PCDGH_HUMAN	no	56101	PCDHGB5	0.9963	3	1	1	0	yes
Human	Q9Y5G3	1 - high confidence	Protocadherin gamma-B1	PCDGD_HUMAN	no	56104	PCDHGB1	0.9963	4	1	1	0	yes
Human	O60279	1 - high confidence	Sushi domain-containing protein 5	SUSD5_HUMAN	no	26032	SUSD5	0.9962	7	1	1	0	yes
Human	Q6J4K2	1 - high confidence	Sodium/potassium/calcium exchanger 6	NCKX6_HUMAN	no	80024	SLC24A6	0.9957	2	1	13	0	yes
Human	O43184	1 - high confidence	Disintegrin and metalloproteinase domain-containing protein 12	ADA12_HUMAN	no	8038	ADAM12	0.9957	2	1	1	0	yes
Human	P54753	1 - high confidence	Ephrin type-B receptor 3	EPHB3_HUMAN	no	2049	EPHB3	0.9957	7	1	1	0	yes
Human	Q16880	1 - high confidence	2-hydroxyacylsphingosine 1-beta-galactosyltransferase	CGT_HUMAN	no	7368	UGT8	0.9957	4	1	1	0	yes
Human	Q7Z7M0	1 - high confidence	Multiple epidermal growth factor-like domains protein 8	MEGF8_HUMAN	no	1954	MEGF8	0.9957	8	1	1	0	yes
Human	Q8NFM7	1 - high confidence	Interleukin-17 receptor D	I17RD_HUMAN	no	54756	IL17RD	0.9957	4	1	1	0	yes
Human	Q8TBP5	1 - high confidence	Membrane protein FAM174A	F174A_HUMAN	no	345757	FAM174A	0.9957	9	1	1	0	yes
Human	Q969W9	1 - high confidence	Transmembrane prostate androgen-induced protein	PMEPA_HUMAN	no	56937	PMEPA1	0.9957	1	1	1	0	yes
Human	Q99519	1 - high confidence	Sialidase-1	NEUR1_HUMAN	no	4758	NEU1	0.9957	3	1	1	0	yes
Human	Q9H013	1 - high confidence	Disintegrin and metalloproteinase domain-containing protein 19	ADA19_HUMAN	no	8728	ADAM19	0.9957	1	1	1	0	yes
Human	Q9NZV1	1 - high confidence	Cysteine-rich motor neuron 1 protein	CRIM1_HUMAN	no	51232	CRIM1	0.9957	1	1	1	0	yes
Human	Q9Y5F6	1 - high confidence	Protocadherin gamma-C5	PCDGM_HUMAN	no	56097	PCDHGC5	0.9957	2	1	1	0	yes
Human	Q9Y5G4	1 - high confidence	Protocadherin gamma-A9	PCDG9_HUMAN	no	56107	PCDHGA9	0.9957	6	1	1	0	yes
Human	P41595	1 - high confidence	5-hydroxytryptamine receptor 2B	5HT2B_HUMAN	no	3357	HTR2B	0.9956	2	1	7	0	yes
Human	Q9GZU1	1 - high confidence	Mucolipin-1	MCLN1_HUMAN	no	57192	MCOLN1	0.9956	4	1	6	0	yes
Human	Q16585	1 - high confidence	Beta-sarcoglycan	SGCB_HUMAN	no	6443	SGCB	0.9956	14	1	1	0	yes
Human	Q92629	1 - high confidence	Delta-sarcoglycan	SGCD_HUMAN	no	6444	SGCD	0.9956	6	1	1	0	yes
Human	Q92956	1 - high confidence	Tumor necrosis factor receptor superfamily member 14	TNR14_HUMAN	no	8764	TNFRSF14	0.9956	1	1	1	0	yes
Human	Q08174	1 - high confidence	Protocadherin-1	PCDH1_HUMAN	no	5097	PCDH1	0.9952	9	1	1	0	yes
Human	Q8N766	1 - high confidence	Uncharacterized protein KIAA0090	K0090_HUMAN	no	23065	KIAA0090	0.9952	28	1	1	0	yes
Human	Q8ND94	1 - high confidence	LRRN4 C-terminal-like protein	LRN4L_HUMAN	no	221091	LRRN4CL	0.9952	6	1	1	0	yes
Human	Q9UHP7	1 - high confidence	C-type lectin domain family 2 member D	CLC2D_HUMAN	no	29121	CLEC2D	0.9952	10	1	1	0	yes
Human	P55286	1 - high confidence	Cadherin-8	CADH8_HUMAN	no	1006	CDH8	0.9947	2	1	2	0	yes
Human	P30542	1 - high confidence	Adenosine receptor A1	AA1R_HUMAN	no	134	ADORA1	0.9946	6	1	7	0	yes
Human	Q5T601	1 - high confidence	Probable G-protein coupled receptor 110	GP110_HUMAN	no	266977	GPR110	0.9946	3	1	7	0	yes
Human	Q99788	1 - high confidence	Chemokine receptor-like 1	CML1_HUMAN	no	1240	CMKLR1	0.9946	1	1	7	0	yes
Human	Q04721	1 - high confidence	Neurogenic locus notch homolog protein 2	NOTC2_HUMAN	no	4853	NOTCH2	0.9946	4	1	1	0	yes
Human	Q12836	1 - high confidence	Zona pellucida sperm-binding protein 4	ZP4_HUMAN	no	57829	ZP4	0.9946	1	1	1	0	yes
Human	Q8IW00	1 - high confidence	Uncharacterized Ig-like domain-containing protein C10orf72	CJ072_HUMAN	no	196740	C10orf72	0.9946	4	1	1	0	yes
Human	Q9HB29	1 - high confidence	Interleukin-1 receptor-like 2	ILRL2_HUMAN	no	8808	IL1RL2	0.9946	2	1	1	0	yes
Human	Q9UPZ6	1 - high confidence	Thrombospondin type-1 domain-containing protein 7A	THS7A_HUMAN	no	221981	THSD7A	0.9946	1	1	1	0	yes
Human	Q9Y5I2	1 - high confidence	Protocadherin alpha-10	PCDAA_HUMAN	no	56139	PCDHA10	0.9946	1	1	1	0	yes
Human	Q96NT5	1 - high confidence	Proton-coupled folate transporter	PCFT_HUMAN	no	113235	SLC46A1	0.9945	26	1	11	0	yes
Human	O95977	1 - high confidence	Sphingosine 1-phosphate receptor 4	S1PR4_HUMAN	no	8698	S1PR4	0.9945	10	1	7	0	yes
Human	O75578	1 - high confidence	Integrin alpha-10	ITA10_HUMAN	no	8515	ITGA10	0.9945	3	1	1	0	yes
Human	P05538	1 - high confidence	HLA class II histocompatibility antigen, DQ beta 2 chain	DQB2_HUMAN	no	3120	HLA-DQB2	0.9945	11	1	1	0	yes
Human	P26010	1 - high confidence	Integrin beta-7	ITB7_HUMAN	no	3695	ITGB7	0.9945	9	1	1	0	yes
Human	P98164	1 - high confidence	Low-density lipoprotein receptor-related protein 2	LRP2_HUMAN	no	4036	LRP2	0.9945	2	1	1	0	yes
Human	Q5VY43	1 - high confidence	Platelet endothelial aggregation receptor 1	PEAR1_HUMAN	no	375033	PEAR1	0.9945	1	1	1	0	yes
Human	Q7Z3B1	1 - high confidence	Neuronal growth regulator 1	NEGR1_HUMAN	no	257194	NEGR1	0.9945	8	1	1	1	yes
Human	Q9NZ53	1 - high confidence	Podocalyxin-like protein 2	PDXL2_HUMAN	no	50512	PODXL2	0.9945	6	1	1	0	yes
Human	Q9Y219	1 - high confidence	Protein jagged-2	JAG2_HUMAN	no	3714	JAG2	0.9945	5	1	1	0	yes
Human	O75487	1 - high confidence	Glypican-4	GPC4_HUMAN	no	2239	GPC4	0.9944	3	1	1	1	yes
Human	Q8WY21	1 - high confidence	VPS10 domain-containing receptor SorCS1	SORC1_HUMAN	no	114815	SORCS1	0.9944	7	1	1	0	yes
Human	A8MVW0	1 - high confidence	Protein FAM171A2	F1712_HUMAN	no	284069	FAM171A2	0.9943	5	1	2	0	yes
Human	P08913	1 - high confidence	Alpha-2A adrenergic receptor	ADA2A_HUMAN	no	150	ADRA2A	0.9942	1	1	7	0	yes
Human	P25106	1 - high confidence	C-X-C chemokine receptor type 7	CXCR7_HUMAN	no	57007	CXCR7	0.9942	7	1	7	0	yes
Human	P35414	1 - high confidence	Apelin receptor	APJ_HUMAN	no	187	APLNR	0.9942	2	1	7	0	yes
Human	Q8IZF2	1 - high confidence	Probable G-protein coupled receptor 116	GP116_HUMAN	no	221395	GPR116	0.9942	3	1	7	0	yes
Human	Q687X5	1 - high confidence	Metalloreductase STEAP4	STEA4_HUMAN	no	79689	STEAP4	0.9942	5	1	6	0	yes
Human	Q6ZMJ2	1 - high confidence	Scavenger receptor class A member 5	SCAR5_HUMAN	no	286133	SCARA5	0.9942	1	1	1	0	yes
Human	Q9NZR2	1 - high confidence	Low-density lipoprotein receptor-related protein 1B	LRP1B_HUMAN	no	53353	LRP1B	0.9941	1	1	1	0	yes
Human	Q6ZQN7	1 - high confidence	Solute carrier organic anion transporter family member 4C1	SO4C1_HUMAN	no	353189	SLCO4C1	0.994	2	1	12	0	yes
Human	P78348	1 - high confidence	Amiloride-sensitive cation channel 2, neuronal	ACCN2_HUMAN	no	41	ACCN2	0.994	1	1	1	0	yes
Human	Q02487	1 - high confidence	Desmocollin-2	DSC2_HUMAN	no	1824	DSC2	0.994	4	1	1	0	yes
Human	Q5VU97	1 - high confidence	VWFA and cache domain-containing protein 1	CAHD1_HUMAN	no	57685	CACHD1	0.994	3	1	1	0	yes
Human	Q8TAB3	1 - high confidence	Protocadherin-19	PCD19_HUMAN	no	57526	PCDH19	0.994	1	1	1	0	yes
Human	Q96GX1	1 - high confidence	Tectonic-2	TECT2_HUMAN	no	79867	TCTN2	0.994	3	1	1	0	yes
Human	Q9NRM6	1 - high confidence	Interleukin-17 receptor B	I17RB_HUMAN	no	55540	IL17RB	0.994	2	1	1	0	yes
Human	O94911	1 - high confidence	ATP-binding cassette sub-family A member 8	ABCA8_HUMAN	no	10351	ABCA8	0.9936	7	1	14	0	yes
Human	Q96AP7	1 - high confidence	Endothelial cell-selective adhesion molecule	ESAM_HUMAN	no	90952	ESAM	0.9936	3	1	1	0	yes
Human	P32241	1 - high confidence	Vasoactive intestinal polypeptide receptor 1	VIPR1_HUMAN	no	7433	VIPR1	0.9934	4	1	7	0	yes
Human	P31994	1 - high confidence	Low affinity immunoglobulin gamma Fc region receptor II-b	FCG2B_HUMAN	no	2213	FCGR2B	0.9934	1	1	1	0	yes
Human	Q93038	1 - high confidence	Tumor necrosis factor receptor superfamily member 25	TNR25_HUMAN	no	8718	TNFRSF25	0.9934	1	1	1	0	yes
Human	Q8NBJ9	1 - high confidence	SID1 transmembrane family member 2	SIDT2_HUMAN	no	51092	SIDT2	0.9933	3	1	11	0	yes
Human	Q7RTT9	1 - high confidence	Equilibrative nucleoside transporter 4	S29A4_HUMAN	no	222962	SLC29A4	0.9933	1	1	10	0	yes
Human	Q9BXA5	1 - high confidence	Succinate receptor 1	SUCR1_HUMAN	no	56670	SUCNR1	0.9933	1	1	7	0	yes
Human	Q9H8M5	1 - high confidence	Metal transporter CNNM2	CNNM2_HUMAN	no	54805	CNNM2	0.9933	13	1	4	0	yes
Human	O43157	1 - high confidence	Plexin-B1	PLXB1_HUMAN	no	5364	PLXNB1	0.9933	25	1	1	0	yes
Human	O60245	1 - high confidence	Protocadherin-7	PCDH7_HUMAN	no	5099	PCDH7	0.9933	19	1	1	0	yes
Human	O60487	1 - high confidence	Myelin protein zero-like protein 2	MPZL2_HUMAN	no	10205	MPZL2	0.9933	11	1	1	0	yes
Human	O75509	1 - high confidence	Tumor necrosis factor receptor superfamily member 21	TNR21_HUMAN	no	27242	TNFRSF21	0.9933	4	1	1	0	yes
Human	P22794	1 - high confidence	Protein EVI2A	EVI2A_HUMAN	no	2123	EVI2A	0.9933	5	1	1	0	yes
Human	P52803	1 - high confidence	Ephrin-A5	EFNA5_HUMAN	no	1946	EFNA5	0.9933	12	1	1	1	yes
Human	P78380	1 - high confidence	Oxidized low-density lipoprotein receptor 1	OLR1_HUMAN	no	4973	OLR1	0.9933	2	1	1	0	yes
Human	Q30201	1 - high confidence	Hereditary hemochromatosis protein	HFE_HUMAN	no	3077	HFE	0.9933	3	1	1	0	yes
Human	Q86WK6	1 - high confidence	Amphoterin-induced protein 1	AMGO1_HUMAN	no	57463	AMIGO1	0.9933	7	1	1	0	yes
Human	Q86YD3	1 - high confidence	Transmembrane protein 25	TMM25_HUMAN	no	84866	TMEM25	0.9933	1	1	1	0	yes
Human	Q9H156	1 - high confidence	SLIT and NTRK-like protein 2	SLIK2_HUMAN	no	84631	SLITRK2	0.9933	3	1	1	0	yes
Human	Q9NT99	1 - high confidence	Leucine-rich repeat-containing protein 4B	LRC4B_HUMAN	no	94030	LRRC4B	0.9933	12	1	1	0	yes
Human	O60896	1 - high confidence	Receptor activity-modifying protein 3	RAMP3_HUMAN	no	10268	RAMP3	0.993	1	1	1	0	yes
Human	Q9C0B5	1 - high confidence	Probable palmitoyltransferase ZDHHC5	ZDHC5_HUMAN	no	25921	ZDHHC5	0.9928	1	1	4	0	yes
Human	Q86VW1	1 - high confidence	Solute carrier family 22 member 16	S22AG_HUMAN	no	85413	SLC22A16	0.9927	2	1	12	0	yes
Human	Q15722	1 - high confidence	Leukotriene B4 receptor 1	LT4R1_HUMAN	no	1241	LTB4R	0.9927	1	1	7	0	yes
Human	P35916	1 - high confidence	Vascular endothelial growth factor receptor 3	VGFR3_HUMAN	no	2324	FLT4	0.9927	1	1	1	0	yes
Human	Q96RD7	1 - high confidence	Pannexin-1	PANX1_HUMAN	no	24145	PANX1	0.9926	3	1	4	0	yes
Human	O95183	1 - high confidence	Vesicle-associated membrane protein 5	VAMP5_HUMAN	no	10791	VAMP5	0.9926	1	1	1	0	yes
Human	Q9Y561	1 - high confidence	Low-density lipoprotein receptor-related protein 12	LRP12_HUMAN	no	29967	LRP12	0.9926	1	1	1	0	yes
Human	P46531	1 - high confidence	Neurogenic locus notch homolog protein 1	NOTC1_HUMAN	no	4851	NOTCH1	0.9925	10	1	1	0	yes
Human	Q5TF39	1 - high confidence	Sodium-dependent glucose transporter 1	NAGT1_HUMAN	no	91749	NAGLT1	0.9924	1	1	11	0	yes
Human	P32418	1 - high confidence	Sodium/calcium exchanger 1	NAC1_HUMAN	no	6546	SLC8A1	0.9924	1	1	10	0	yes
Human	P32297	1 - high confidence	Neuronal acetylcholine receptor subunit alpha-3	ACHA3_HUMAN	no	1136	CHRNA3	0.9924	1	1	4	0	yes
Human	A8MWY0	1 - high confidence	UPF0577 protein KIAA1324-like	K132L_HUMAN	no	222223	KIAA1324L	0.9924	2	1	1	0	yes
Human	O95754	1 - high confidence	Semaphorin-4F	SEM4F_HUMAN	no	10505	SEMA4F	0.9924	4	1	1	0	yes
Human	Q16288	1 - high confidence	NT-3 growth factor receptor	NTRK3_HUMAN	no	4916	NTRK3	0.9924	4	1	1	0	yes
Human	Q95460	1 - high confidence	Major histocompatibility complex class I-related gene protein	HMR1_HUMAN	no	3140	MR1	0.9921	7	1	1	0	yes
Human	Q17RY6	1 - high confidence	Lymphocyte antigen 6K	LY6K_HUMAN	no	54742	LY6K	0.992	1	1	1	1	yes
Human	Q8NFJ5	1 - high confidence	Retinoic acid-induced protein 3	RAI3_HUMAN	no	9052	GPRC5A	0.9919	2	1	7	0	yes
Human	Q9H1C0	1 - high confidence	Lysophosphatidic acid receptor 5	LPAR5_HUMAN	no	57121	LPAR5	0.9918	3	1	7	0	yes
Human	Q9UNW8	1 - high confidence	Probable G-protein coupled receptor 132	GP132_HUMAN	no	29933	GPR132	0.9918	3	1	7	0	yes
Human	Q96E93	1 - high confidence	Killer cell lectin-like receptor subfamily G member 1	KLRG1_HUMAN	no	10219	KLRG1	0.9918	2	1	1	0	yes
Human	Q96F05	1 - high confidence	Uncharacterized protein C11orf24	CK024_HUMAN	no	53838	C11orf24	0.9914	1	1	1	0	yes
Human	Q9UHC6	1 - high confidence	Contactin-associated protein-like 2	CNTP2_HUMAN	no	26047	CNTNAP2	0.9912	1	1	1	0	yes
Human	Q13705	1 - high confidence	Activin receptor type-2B	AVR2B_HUMAN	no	93	ACVR2B	0.991	1	1	1	0	yes
Human	Q9H228	1 - high confidence	Sphingosine 1-phosphate receptor 5	S1PR5_HUMAN	no	53637	S1PR5	0.99	5	1	7	0	yes
Human	A6NKC4	1 - high confidence	Putative high affinity immunoglobulin gamma Fc receptor IC	FCGRC_HUMAN	no	100132417	FCGR1C	0.99	3	1	1	0	yes
Human	O43556	1 - high confidence	Epsilon-sarcoglycan	SGCE_HUMAN	no	8910	SGCE	0.99	17	1	1	0	yes
Human	O60939	1 - high confidence	Sodium channel subunit beta-2	SCN2B_HUMAN	no	6327	SCN2B	0.99	1	1	1	0	yes
Human	P40126	1 - high confidence	L-dopachrome tautomerase	TYRP2_HUMAN	no	1638	DCT	0.99	2	1	1	0	yes
Human	Q13018	1 - high confidence	Secretory phospholipase A2 receptor	PLA2R_HUMAN	no	22925	PLA2R1	0.99	1	1	1	0	yes
Human	Q9P244	1 - high confidence	Leucine-rich repeat and fibronectin type III domain-containing protein 1	LRFN1_HUMAN	no	57622	LRFN1	0.99	2	1	1	0	yes
Human	P25101	1 - high confidence	Endothelin-1 receptor	EDNRA_HUMAN	no	1909	EDNRA	0.9896	4	1	7	0	yes
Human	Q8NFZ4	1 - high confidence	Neuroligin-2	NLGN2_HUMAN	no	57555	NLGN2	0.9893	1	1	1	0	yes
Human	Q9ULB4	1 - high confidence	Cadherin-9	CADH9_HUMAN	no	1007	CDH9	0.9892	1	1	1	0	yes
Human	O75121	1 - high confidence	Microfibrillar-associated protein 3-like	MFA3L_HUMAN	no	9848	MFAP3L	0.989	2	1	1	0	yes
Human	Q96PE1	1 - high confidence	Probable G-protein coupled receptor 124	GP124_HUMAN	no	25960	GPR124	0.9888	8	1	7	0	yes
Human	Q8IWT1	1 - high confidence	Sodium channel subunit beta-4	SCN4B_HUMAN	no	6330	SCN4B	0.9886	3	1	1	0	yes
Human	P35590	1 - high confidence	Tyrosine-protein kinase receptor Tie-1	TIE1_HUMAN	no	7075	TIE1	0.9882	2	1	1	0	yes
Human	P17948	1 - high confidence	Vascular endothelial growth factor receptor 1	VGFR1_HUMAN	no	2321	FLT1	0.9877	1	1	1	0	yes
Human	P36941	1 - high confidence	Tumor necrosis factor receptor superfamily member 3	TNR3_HUMAN	no	4055	LTBR	0.9877	26	1	1	0	yes
Human	Q99650	1 - high confidence	Oncostatin-M-specific receptor subunit beta	OSMR_HUMAN	no	9180	OSMR	0.9877	18	1	1	0	yes
Human	Q9Y666	1 - high confidence	Solute carrier family 12 member 7	S12A7_HUMAN	no	10723	SLC12A7	0.9872	1	1	12	0	yes
Human	P16473	1 - high confidence	Thyrotropin receptor	TSHR_HUMAN	no	7253	TSHR	0.9872	1	1	7	0	yes
Human	Q9Y5S1	1 - high confidence	Transient receptor potential cation channel subfamily V member 2	TRPV2_HUMAN	no	51393	TRPV2	0.9872	1	1	6	0	yes
Human	Q9ULK0	1 - high confidence	Glutamate receptor delta-1 subunit	GRID1_HUMAN	no	2894	GRID1	0.9872	3	1	4	0	yes
Human	P55899	1 - high confidence	IgG receptor FcRn large subunit p51	FCGRN_HUMAN	no	2217	FCGRT	0.9872	3	1	1	0	yes
Human	Q03167	1 - high confidence	Transforming growth factor beta receptor type 3	TGBR3_HUMAN	no	7049	TGFBR3	0.9868	3	1	1	0	yes
Human	Q9H3T3	1 - high confidence	Semaphorin-6B	SEM6B_HUMAN	no	10501	SEMA6B	0.9864	1	1	1	0	yes
Human	P47869	1 - high confidence	Gamma-aminobutyric acid receptor subunit alpha-2	GBRA2_HUMAN	no	2555	GABRA2	0.986	2	1	4	0	yes
Human	P07949	1 - high confidence	Proto-oncogene tyrosine-protein kinase receptor Ret	RET_HUMAN	no	5979	RET	0.9859	2	1	1	0	yes
Human	Q9Y5G5	1 - high confidence	Protocadherin gamma-A8	PCDG8_HUMAN	no	9708	PCDHGA8	0.9857	1	1	1	0	yes
Human	P21453	1 - high confidence	Sphingosine 1-phosphate receptor 1	S1PR1_HUMAN	no	1901	S1PR1	0.9839	7	1	7	0	yes
Human	Q13591	1 - high confidence	Semaphorin-5A	SEM5A_HUMAN	no	9037	SEMA5A	0.9831	4	1	1	0	yes
Human	Q8N8Z6	1 - high confidence	Discoidin, CUB and LCCL domain-containing protein 1	DCBD1_HUMAN	no	285761	DCBLD1	0.9825	32	1	1	0	yes
Human	Q86WI1	1 - high confidence	Fibrocystin-L	PKHL1_HUMAN	no	93035	PKHD1L1	0.9819	1	1	1	0	yes
Human	P15514	1 - high confidence	Amphiregulin	AREG_HUMAN	no	374	AREG	0.9814	3	1	1	0	yes
Human	P10319	1 - high confidence	HLA class I histocompatibility antigen, B-58 alpha chain	1B58_HUMAN	no	3106	HLA-B	0.98	3	1	1	0	yes
Human	Q6UWI2	1 - high confidence	Prostate androgen-regulated mucin-like protein 1	PARM1_HUMAN	no	25849	PARM1	0.98	9	1	1	0	yes
Human	P22223	1 - high confidence	Cadherin-3	CADH3_HUMAN	no	1001	CDH3	0.9785	1	1	1	0	yes
Human	P17342	1 - high confidence	Atrial natriuretic peptide receptor 3	ANPRC_HUMAN	no	4883	NPR3	0.9757	5	1	1	0	yes
Human	P55287	1 - high confidence	Cadherin-11	CAD11_HUMAN	no	1009	CDH11	0.9722	3	1	1	0	yes
Human	P43115	1 - high confidence	Prostaglandin E2 receptor EP3 subtype	PE2R3_HUMAN	no	5733	PTGER3	0.968	1	1	7	0	yes
Human	O75197	1 - high confidence	Low-density lipoprotein receptor-related protein 5	LRP5_HUMAN	no	4041	LRP5	0.9673	4	1	1	0	yes
Human	Q8J025	1 - high confidence	Protein APCDD1	APCD1_HUMAN	no	147495	APCDD1	0.9644	3	1	1	0	yes
Human	Q9NZM1	1 - high confidence	Myoferlin	MYOF_HUMAN	no	26509	MYOF	0.964	3	1	1	0	yes
Human	P09603	1 - high confidence	Macrophage colony-stimulating factor 1	CSF1_HUMAN	no	1435	CSF1	0.9613	15	1	1	0	yes
Human	Q9UKZ4	1 - high confidence	Teneurin-1	TEN1_HUMAN	no	10178	ODZ1	0.96	2	1	1	0	yes
Human	Q8N3J6	1 - high confidence	Cell adhesion molecule 2	CADM2_HUMAN	no	253559	CADM2	0.9556	5	1	1	0	yes
Human	Q9BXC1	1 - high confidence	Probable G-protein coupled receptor 174	GP174_HUMAN	no	84636	GPR174	0.9547	1	1	7	0	yes
Human	Q86VZ4	1 - high confidence	Low-density lipoprotein receptor-related protein 11	LRP11_HUMAN	no	84918	LRP11	0.9513	3	1	1	0	yes
Human	Q96J42	1 - high confidence	Thioredoxin domain-containing protein 15	TXD15_HUMAN	no	79770	TXNDC15	0.9448	17	1	1	0	yes
Human	Q8IUW5	1 - high confidence	RELT-like protein 1	RELL1_HUMAN	no	768211	RELL1	0.94	5	1	1	0	yes
Human	P42262	1 - high confidence	Glutamate receptor 2	GRIA2_HUMAN	no	2891	GRIA2	0.9365	1	1	3	0	yes
Human	P51172	1 - high confidence	Amiloride-sensitive sodium channel subunit delta	SCNND_HUMAN	no	6339	SCNN1D	0.936	1	1	2	0	yes
Human	P28221	1 - high confidence	5-hydroxytryptamine receptor 1D	5HT1D_HUMAN	no	3352	HTR1D	0.9334	1	1	7	0	yes
Human	Q86XS8	1 - high confidence	Goliath homolog	GOLI_HUMAN	no	55819	RNF130	0.9217	1	1	2	0	yes
Human	Q8IZY2	1 - high confidence	ATP-binding cassette sub-family A member 7	ABCA7_HUMAN	no	10347	ABCA7	0.919	3	1	11	0	yes
Human	P43119	1 - high confidence	Prostacyclin receptor	PI2R_HUMAN	no	5739	PTGIR	0.919	3	1	7	0	yes
Human	Q14439	1 - high confidence	Probable G-protein coupled receptor 176	GP176_HUMAN	no	11245	GPR176	0.9145	3	1	7	0	yes
Human	O94933	1 - high confidence	SLIT and NTRK-like protein 3	SLIK3_HUMAN	no	22865	SLITRK3	0.9124	1	1	1	0	yes
Human	P34981	1 - high confidence	Thyrotropin-releasing hormone receptor	TRFR_HUMAN	no	7201	TRHR	0.8995	4	1	7	0	yes
Human	P56749	1 - high confidence	Claudin-12	CLD12_HUMAN	no	9069	CLDN12	0.89	1	1	4	0	yes
Human	Q9Y5I1	1 - high confidence	Protocadherin alpha-11	PCDAB_HUMAN	no	56138	PCDHA11	0.8741	1	1	1	0	yes
Human	Q92508	1 - high confidence	Protein FAM38A	FA38A_HUMAN	no	9780	FAM38A	1	29	1	29	0	yes
Human	O15118	1 - high confidence	Niemann-Pick C1 protein	NPC1_HUMAN	no	4864	NPC1	1	17	1	13	0	yes
Human	Q7L0J3	1 - high confidence	Synaptic vesicle glycoprotein 2A	SV2A_HUMAN	no	9900	SV2A	1	13	1	12	0	yes
Human	Q8TCT7	1 - high confidence	Signal peptide peptidase-like 2B	PSL1_HUMAN	no	56928	SPPL2B	1	22	1	9	0	yes
Human	Q6PJF5	1 - high confidence	Rhomboid family member 2	RHDF2_HUMAN	no	79651	RHBDF2	1	3	1	7	0	yes
Human	Q8N6C5	1 - high confidence	Immunoglobulin superfamily member 1	IGSF1_HUMAN	no	3547	IGSF1	1	4	1	4	0	yes
Human	P04844	1 - high confidence	Dolichyl-diphosphooligosaccharide--protein glycosyltransferase subunit 2	RPN2_HUMAN	no	6185	RPN2	1	15	1	3	0	yes
Human	Q9BVK6	1 - high confidence	Transmembrane emp24 domain-containing protein 9	TMED9_HUMAN	no	54732	TMED9	1	28	1	2	0	yes
Human	P20645	1 - high confidence	Cation-dependent mannose-6-phosphate receptor	MPRD_HUMAN	no	4074	M6PR	1	42	1	1	0	yes
Human	Q15904	1 - high confidence	V-type proton ATPase subunit S1	VAS1_HUMAN	no	537	ATP6AP1	1	30	1	1	0	yes
Human	Q24JP5	1 - high confidence	Transmembrane protein 132A	T132A_HUMAN	no	54972	TMEM132A	1	10	1	1	0	yes
Human	Q6EMK4	1 - high confidence	Vasorin	VASN_HUMAN	no	114990	VASN	1	23	1	1	0	yes
Human	Q8WWB7	1 - high confidence	Lysosomal protein NCU-G1	NCUG1_HUMAN	no	112770	C1orf85	1	13	1	1	0	yes
Human	Q96JJ7	1 - high confidence	Protein disulfide-isomerase TMX3	TMX3_HUMAN	no	54495	TMX3	1	14	1	1	0	yes
Human	Q9NS62	1 - high confidence	Thrombospondin type-1 domain-containing protein 1	THSD1_HUMAN	no	55901	THSD1	1	6	1	1	0	yes
Human	Q9UBV2	1 - high confidence	Protein sel-1 homolog 1	SE1L1_HUMAN	no	6400	SEL1L	1	26	1	1	0	yes
Human	Q9Y3B3	1 - high confidence	Transmembrane emp24 domain-containing protein 7	TMED7_HUMAN	no	51014	TMED7	1	7	1	1	0	yes
Human	O43567	1 - high confidence	RING finger protein 13	RNF13_HUMAN	no	11342	RNF13	1	11	1	1	0	yes
Human	P11117	1 - high confidence	Lysosomal acid phosphatase	PPAL_HUMAN	no	53	ACP2	1	21	1	1	0	yes
Human	P27824	1 - high confidence	Calnexin	CALX_HUMAN	no	821	CANX	1	31	1	1	0	yes
Human	P43307	1 - high confidence	Translocon-associated protein subunit alpha	SSRA_HUMAN	no	6745	SSR1	1	10	1	1	0	yes
Human	P43308	1 - high confidence	Translocon-associated protein subunit beta	SSRB_HUMAN	no	6746	SSR2	1	29	1	1	0	yes
Human	Q10472	1 - high confidence	Polypeptide N-acetylgalactosaminyltransferase 1	GALT1_HUMAN	no	2589	GALNT1	1	1	1	1	0	yes
Human	Q12907	1 - high confidence	Vesicular integral-membrane protein VIP36	LMAN2_HUMAN	no	10960	LMAN2	1	29	1	1	0	yes
Human	Q14314	1 - high confidence	Fibroleukin	FGL2_HUMAN	no	10875	FGL2	1	3	1	1	0	yes
Human	Q6UVY6	1 - high confidence	DBH-like monooxygenase protein 1	MOXD1_HUMAN	no	26002	MOXD1	1	6	1	1	0	yes
Human	Q7Z7H5	1 - high confidence	Transmembrane emp24 domain-containing protein 4	TMED4_HUMAN	no	222068	TMED4	1	25	1	1	0	yes
Human	Q8TEM1	1 - high confidence	Nuclear pore membrane glycoprotein 210	PO210_HUMAN	no	23225	NUP210	1	24	1	1	0	yes
Human	Q92896	1 - high confidence	Golgi apparatus protein 1	GSLG1_HUMAN	no	2734	GLG1	1	29	1	1	0	yes
Human	Q969N2	1 - high confidence	GPI transamidase component PIG-T	PIGT_HUMAN	no	51604	PIGT	1	13	1	1	0	yes
Human	Q9H0V9	1 - high confidence	VIP36-like protein	LMA2L_HUMAN	no	81562	LMAN2L	1	8	1	1	0	yes
Human	Q9UBQ6	1 - high confidence	Exostosin-like 2	EXTL2_HUMAN	no	2135	EXTL2	1	1	1	1	0	yes
Human	Q9ULI3	1 - high confidence	Protein HEG homolog 1	HEG1_HUMAN	no	57493	HEG1	1	22	1	1	0	yes
Human	P40967	1 - high confidence	Melanocyte protein Pmel 17	PME17_HUMAN	no	6490	SILV	0.9999	2	1	1	0	yes
Human	P04843	1 - high confidence	Dolichyl-diphosphooligosaccharide--protein glycosyltransferase subunit 1	RPN1_HUMAN	no	6184	RPN1	0.9998	29	1	1	0	yes
Human	O60656	1 - high confidence	UDP-glucuronosyltransferase 1-9	UD19_HUMAN	no	54600	UGT1A9	0.9976	3	1	1	0	yes
Human	P08842	1 - high confidence	Steryl-sulfatase	STS_HUMAN	no	412	STS	0.9967	2	1	2	0	yes
Human	Q8NAU1	1 - high confidence	Fibronectin type III domain-containing protein 5	FNDC5_HUMAN	no	252995	FNDC5	0.9967	3	1	1	0	yes
Human	Q9Y287	1 - high confidence	Integral membrane protein 2B	ITM2B_HUMAN	no	9445	ITM2B	0.9967	2	1	1	0	yes
Human	P53801	1 - high confidence	Pituitary tumor-transforming gene 1 protein-interacting protein	PTTG_HUMAN	no	754	PTTG1IP	0.9967	4	1	1	0	yes
Human	O15321	1 - high confidence	Transmembrane 9 superfamily member 1	TM9S1_HUMAN	no	10548	TM9SF1	0.9956	17	1	9	0	yes
Human	Q5JRA6	1 - high confidence	Melanoma inhibitory activity protein 3	MIA3_HUMAN	no	375056	MIA3	0.9956	9	1	2	0	yes
Human	P54793	1 - high confidence	Arylsulfatase F	ARSF_HUMAN	no	416	ARSF	0.9943	1	1	2	0	yes
Human	Q14CZ8	1 - high confidence	Hepatocyte cell adhesion molecule	HECAM_HUMAN	no	220296	HEPACAM	0.9942	2	1	1	0	yes
Human	Q8IUK5	1 - high confidence	Plexin domain-containing protein 1	PXDC1_HUMAN	no	57125	PLXDC1	0.9941	1	1	1	0	yes
Human	Q8TB96	1 - high confidence	T-cell immunomodulatory protein	TIP_HUMAN	no	81533	ITFG1	0.994	17	1	1	0	yes
Human	Q9P0T7	1 - high confidence	Transmembrane protein 9	TMEM9_HUMAN	no	252839	TMEM9	0.9939	13	1	1	0	yes
Human	P14672	1 - high confidence	Solute carrier family 2, facilitated glucose transporter member 4	GTR4_HUMAN	no	6517	SLC2A4	0.9933	11	1	12	0	yes
Human	P56817	1 - high confidence	Beta-secretase 1	BACE1_HUMAN	no	23621	BACE1	0.9933	1	1	1	0	yes
Human	Q9UK23	1 - high confidence	N-acetylglucosamine-1-phosphodiester alpha-N-acetylglucosaminidase	NAGPA_HUMAN	no	51172	NAGPA	0.9924	5	1	1	0	yes
Human	Q75V66	1 - high confidence	Anoctamin-5	ANO5_HUMAN	no	203859	ANO5	0.991	1	1	8	0	yes
Human	O00391	1 - high confidence	Sulfhydryl oxidase 1	QSOX1_HUMAN	no	5768	QSOX1	0.9871	1	1	1	0	yes
Human	Q969V3	1 - high confidence	Nicalin	NCLN_HUMAN	no	56926	NCLN	0.9753	1	1	2	0	yes
Human	Q8TDJ6	1 - high confidence	DmX-like protein 2	DMXL2_HUMAN	no	23312	DMXL2	0.9236	1	1	1	0	yes
Human	Q8N4V1	1 - high confidence	Membrane magnesium transporter 1	MMGT1_HUMAN	no	93380	MMGT1	0.8675	1	1	1	0	yes
Human	Q16853	3 - unspecific	Membrane primary amine oxidase	AOC3_HUMAN	no	8639	AOC3	1	3	0	0	0	#N/A
Human	Q4G148	3 - unspecific	Glucoside xylosyltransferase 1	GXLT1_HUMAN	no	283464	GXYLT1	1	8	0	0	0	#N/A
Human	Q92478	3 - unspecific	C-type lectin domain family 2 member B	CLC2B_HUMAN	no	9976	CLEC2B	1	9	0	0	0	#N/A
Human	P36269	3 - unspecific	Gamma-glutamyltransferase 5	GGT5_HUMAN	no	2687	GGT5	0.9999	14	0	0	0	#N/A
Human	Q9UJ14	3 - unspecific	Gamma-glutamyltransferase 7	GGT7_HUMAN	no	2686	GGT7	0.9972	3	0	0	0	#N/A
Human	Q68CQ7	3 - unspecific	Glycosyltransferase 8 domain-containing protein 1	GL8D1_HUMAN	no	55830	GLT8D1	0.9962	9	0	0	0	#N/A
Human	Q9BVA6	3 - unspecific	Adenosine monophosphate-protein transferase FICD	FICD_HUMAN	no	11153	FICD	0.9957	1	0	0	0	#N/A
Human	Q15165	3 - unspecific	Serum paraoxonase/arylesterase 2	PON2_HUMAN	no	5445	PON2	0.9956	18	0	0	0	#N/A
Human	P30414	3 - unspecific	NK-tumor recognition protein	NKTR_HUMAN	no	4820	NKTR	0.9945	1	0	0	0	#N/A
Human	A6NGU5	3 - unspecific	Putative gamma-glutamyltranspeptidase 3	GGT3_HUMAN	no	2679	GGT3P	0.9915	21	0	0	0	#N/A
Human	O60243	3 - unspecific	Heparan-sulfate 6-O-sulfotransferase 1	H6ST1_HUMAN	no	9394	HS6ST1	0.9341	1	0	0	0	#N/A
Human	O00469	3 - unspecific	Procollagen-lysine,2-oxoglutarate 5-dioxygenase 2	PLOD2_HUMAN	no	5352	PLOD2	1	17	0	0	0	#N/A
Human	P04062	3 - unspecific	Glucosylceramidase	GLCM_HUMAN	no	2629	GBA	1	19	0	0	0	#N/A
Human	P30533	3 - unspecific	Alpha-2-macroglobulin receptor-associated protein	AMRP_HUMAN	no	4043	LRPAP1	1	9	0	0	0	#N/A
Human	Q02809	3 - unspecific	Procollagen-lysine,2-oxoglutarate 5-dioxygenase 1	PLOD1_HUMAN	no	5351	PLOD1	1	23	0	0	0	#N/A
Human	Q8IWU6	3 - unspecific	Extracellular sulfatase Sulf-1	SULF1_HUMAN	no	23213	SULF1	1	4	0	0	0	#N/A
Human	Q96HE7	3 - unspecific	ERO1-like protein alpha	ERO1A_HUMAN	no	30001	ERO1L	1	8	0	0	0	#N/A
Human	O00587	3 - unspecific	Beta-1,3-N-acetylglucosaminyltransferase manic fringe	MFNG_HUMAN	no	4242	MFNG	1	1	0	0	0	#N/A
Human	O43505	3 - unspecific	N-acetyllactosaminide beta-1,3-N-acetylglucosaminyltransferase	B3GN1_HUMAN	no	11041	B3GNT1	1	9	0	0	0	#N/A
Human	O60512	3 - unspecific	Beta-1,4-galactosyltransferase 3	B4GT3_HUMAN	no	8703	B4GALT3	1	11	0	0	0	#N/A
Human	O94923	3 - unspecific	D-glucuronyl C5-epimerase	GLCE_HUMAN	no	26035	GLCE	1	6	0	0	0	#N/A
Human	P04350	3 - unspecific	Tubulin beta-4 chain	TBB4_HUMAN	no	10382	TUBB4	1	3	0	0	0	#N/A
Human	P07437	3 - unspecific	Tubulin beta chain	TBB5_HUMAN	no	203068	TUBB	1	27	0	0	0	#N/A
Human	P07737	3 - unspecific	Profilin-1	PROF1_HUMAN	no	5216	PFN1	1	24	0	0	0	#N/A
Human	P22695	3 - unspecific	Cytochrome b-c1 complex subunit 2, mitochondrial	QCR2_HUMAN	no	7385	UQCRC2	1	17	0	0	0	#N/A
Human	P29966	3 - unspecific	Myristoylated alanine-rich C-kinase substrate	MARCS_HUMAN	no	4082	MARCKS	1	5	0	0	0	#N/A
Human	P60709	3 - unspecific	Actin, cytoplasmic 1	ACTB_HUMAN	no	60	ACTB	1	44	0	0	0	#N/A
Human	P68366	3 - unspecific	Tubulin alpha-4A chain	TBA4A_HUMAN	no	7277	TUBA4A	1	2	0	0	0	#N/A
Human	Q00610	3 - unspecific	Clathrin heavy chain 1	CLH1_HUMAN	no	1213	CLTC	1	18	0	0	0	#N/A
Human	Q495W5	3 - unspecific	Alpha-(1,3)-fucosyltransferase 11	FUT11_HUMAN	no	170384	FUT11	1	2	0	0	0	#N/A
Human	Q6P179	3 - unspecific	Endoplasmic reticulum aminopeptidase 2	ERAP2_HUMAN	no	64167	ERAP2	1	10	0	0	0	#N/A
Human	Q6PIU2	3 - unspecific	Neutral cholesterol ester hydrolase 1	NCEH1_HUMAN	no	57552	NCEH1	1	11	0	0	0	#N/A
Human	Q7LGA3	3 - unspecific	Heparan sulfate 2-O-sulfotransferase 1	HS2ST_HUMAN	no	9653	HS2ST1	1	26	0	0	0	#N/A
Human	Q7Z7M9	3 - unspecific	Polypeptide N-acetylgalactosaminyltransferase 5	GALT5_HUMAN	no	11227	GALNT5	1	4	0	0	0	#N/A
Human	Q92187	3 - unspecific	CMP-N-acetylneuraminate-poly-alpha-2,8-sialyltransferase	SIA8D_HUMAN	no	7903	ST8SIA4	1	1	0	0	0	#N/A
Human	Q96RQ1	3 - unspecific	Endoplasmic reticulum-Golgi intermediate compartment protein 2	ERGI2_HUMAN	no	51290	ERGIC2	1	7	0	0	0	#N/A
Human	Q9NZ08	3 - unspecific	Endoplasmic reticulum aminopeptidase 1	ERAP1_HUMAN	no	51752	ERAP1	1	5	0	0	0	#N/A
Human	P68371	3 - unspecific	Tubulin beta-2C chain	TBB2C_HUMAN	no	10383	TUBB2C	0.9995	8	0	0	0	#N/A
Human	Q9BUF5	3 - unspecific	Tubulin beta-6 chain	TBB6_HUMAN	no	84617	TUBB6	0.9985	4	0	0	0	#N/A
Human	P35354	3 - unspecific	Prostaglandin G/H synthase 2	PGH2_HUMAN	no	5743	PTGS2	0.9976	3	0	0	0	#N/A
Human	O43286	3 - unspecific	Beta-1,4-galactosyltransferase 5	B4GT5_HUMAN	no	9334	B4GALT5	0.9972	2	0	0	0	#N/A
Human	Q9P2E5	3 - unspecific	Chondroitin sulfate glucuronyltransferase	CHPF2_HUMAN	no	54480	CHPF2	0.9969	4	0	0	0	#N/A
Human	Q8IWU5	3 - unspecific	Extracellular sulfatase Sulf-2	SULF2_HUMAN	no	55959	SULF2	0.9967	4	0	0	0	#N/A
Human	Q15818	3 - unspecific	Neuronal pentraxin-1	NPTX1_HUMAN	no	4884	NPTX1	0.9966	3	0	0	0	#N/A
Human	Q9UQ53	3 - unspecific	Alpha-1,3-mannosyl-glycoprotein 4-beta-N-acetylglucosaminyltransferase B	MGT4B_HUMAN	no	11282	MGAT4B	0.9966	8	0	0	0	#N/A
Human	Q6Y288	3 - unspecific	Beta-1,3-glucosyltransferase	B3GLT_HUMAN	no	145173	B3GALTL	0.9961	1	0	0	0	#N/A
Human	Q86YB8	3 - unspecific	ERO1-like protein beta	ERO1B_HUMAN	no	56605	ERO1LB	0.9957	4	0	0	0	#N/A
Human	Q70JA7	3 - unspecific	Chondroitin sulfate synthase 3	CHSS3_HUMAN	no	337876	CHSY3	0.9957	2	0	0	0	#N/A
Human	Q9NS84	3 - unspecific	Carbohydrate sulfotransferase 7	CHST7_HUMAN	no	56548	CHST7	0.9957	2	0	0	0	#N/A
Human	Q8NBJ4	3 - unspecific	Golgi membrane protein 1	GOLM1_HUMAN	no	51280	GOLM1	0.9956	31	0	0	0	#N/A
Human	Q9NPF2	3 - unspecific	Carbohydrate sulfotransferase 11	CHSTB_HUMAN	no	50515	CHST11	0.9956	4	0	0	0	#N/A
Human	Q5NDL2	3 - unspecific	Uncharacterized glycosyltransferase AER61	AER61_HUMAN	no	285203	AER61	0.9952	3	0	0	0	#N/A
Human	O75063	3 - unspecific	Protein FAM20B	FA20B_HUMAN	no	9917	FAM20B	0.9947	1	0	0	0	#N/A
Human	Q9Y644	3 - unspecific	Beta-1,3-N-acetylglucosaminyltransferase radical fringe	RFNG_HUMAN	no	5986	RFNG	0.994	8	0	0	0	#N/A
Human	O75477	3 - unspecific	Erlin-1	ERLN1_HUMAN	no	10613	ERLIN1	0.9931	6	0	0	0	#N/A
Human	O60568	3 - unspecific	Procollagen-lysine,2-oxoglutarate 5-dioxygenase 3	PLOD3_HUMAN	no	8985	PLOD3	0.993	24	0	0	0	#N/A
Human	Q6IS24	3 - unspecific	Putative polypeptide N-acetylgalactosaminyltransferase-like protein 3	GLTL3_HUMAN	no	64409	WBSCR17	0.9927	1	0	0	0	#N/A
Human	Q8NDV1	3 - unspecific	Alpha-N-acetylgalactosaminide alpha-2,6-sialyltransferase 3	SIA7C_HUMAN	no	256435	ST6GALNAC3	0.9918	1	0	0	0	#N/A
Human	O75072	3 - unspecific	Fukutin	FKTN_HUMAN	no	2218	FKTN	0.9744	1	0	0	0	#N/A
Human	Q9GZX3	3 - unspecific	Carbohydrate sulfotransferase 6	CHST6_HUMAN	no	4166	CHST6	0.9376	7	0	0	0	#N/A
Human	Q99550	3 - unspecific	M-phase phosphoprotein 9	MPP9_HUMAN	no	10198	MPHOSPH9	0.9216	1	0	0	0	#N/A
Human	O00754	3 - unspecific	Lysosomal alpha-mannosidase	MA2B1_HUMAN	no	4125	MAN2B1	1	12	0	0	0	#N/A
Human	P01733	3 - unspecific	T-cell receptor beta chain V region YT35	TVB1_HUMAN	no	28577	TRBV12-3	1	4	0	0	0	#N/A
Human	P01737	3 - unspecific	T-cell receptor alpha chain V region PY14	TVA3_HUMAN	no	0	0	1	1	0	0	0	#N/A
Human	P04435	3 - unspecific	T-cell receptor beta chain V region CTL-L17	TVB2_HUMAN	no	0	TCRB	1	1	0	0	0	#N/A
Human	P05164	3 - unspecific	Myeloperoxidase	PERM_HUMAN	no	4353	MPO	1	5	0	0	0	#N/A
Human	P07602	3 - unspecific	Proactivator polypeptide [Cleaved into: Saposin-A	SAP_HUMAN	no	5660	PSAP	1	8	0	0	0	#N/A
Human	P07996	3 - unspecific	Thrombospondin-1	TSP1_HUMAN	no	7057	THBS1	1	33	0	0	0	#N/A
Human	P10619	3 - unspecific	Lysosomal protective protein	PPGB_HUMAN	no	5476	CTSA	1	4	0	0	0	#N/A
Human	P13674	3 - unspecific	Prolyl 4-hydroxylase subunit alpha-1	P4HA1_HUMAN	no	5033	P4HA1	1	14	0	0	0	#N/A
Human	P14314	3 - unspecific	Glucosidase 2 subunit beta	GLU2B_HUMAN	no	5589	PRKCSH	1	12	0	0	0	#N/A
Human	P14625	3 - unspecific	Endoplasmin	ENPL_HUMAN	no	7184	HSP90B1	1	31	0	0	0	#N/A
Human	P15586	3 - unspecific	N-acetylglucosamine-6-sulfatase	GNS_HUMAN	no	2799	GNS	1	8	0	0	0	#N/A
Human	P23141	3 - unspecific	Liver carboxylesterase 1	EST1_HUMAN	no	1066	CES1	1	1	0	0	0	#N/A
Human	P23284	3 - unspecific	Peptidyl-prolyl cis-trans isomerase B	PPIB_HUMAN	no	5479	PPIB	1	20	0	0	0	#N/A
Human	P35442	3 - unspecific	Thrombospondin-2	TSP2_HUMAN	no	7058	THBS2	1	6	0	0	0	#N/A
Human	P38571	3 - unspecific	Lysosomal acid lipase/cholesteryl ester hydrolase	LICH_HUMAN	no	3988	LIPA	1	6	0	0	0	#N/A
Human	P48723	3 - unspecific	Heat shock 70 kDa protein 13	HSP13_HUMAN	no	6782	HSPA13	1	7	0	0	0	#N/A
Human	P49184	3 - unspecific	Deoxyribonuclease-1-like 1	DNSL1_HUMAN	no	1774	DNASE1L1	1	9	0	0	0	#N/A
Human	P53634	3 - unspecific	Dipeptidyl peptidase 1	CATC_HUMAN	no	1075	CTSC	1	13	0	0	0	#N/A
Human	P54802	3 - unspecific	Alpha-N-acetylglucosaminidase	ANAG_HUMAN	no	4669	NAGLU	1	6	0	0	0	#N/A
Human	Q13510	3 - unspecific	Acid ceramidase	ASAH1_HUMAN	no	427	ASAH1	1	12	0	0	0	#N/A
Human	Q15293	3 - unspecific	Reticulocalbin-1	RCN1_HUMAN	no	5954	RCN1	1	18	0	0	0	#N/A
Human	Q7Z4H8	3 - unspecific	KDEL motif-containing protein 2	KDEL2_HUMAN	no	143888	KDELC2	1	8	0	0	0	#N/A
Human	Q8IYK4	3 - unspecific	Procollagen galactosyltransferase 2	GT252_HUMAN	no	23127	GLT25D2	1	2	0	0	0	#N/A
Human	Q8NBJ5	3 - unspecific	Procollagen galactosyltransferase 1	GT251_HUMAN	no	79709	GLT25D1	1	13	0	0	0	#N/A
Human	Q8NHP8	3 - unspecific	Putative phospholipase B-like 2	PLBL2_HUMAN	no	196463	PLBD2	1	6	0	0	0	#N/A
Human	Q96AY3	3 - unspecific	Peptidyl-prolyl cis-trans isomerase FKBP10	FKB10_HUMAN	no	60681	FKBP10	1	19	0	0	0	#N/A
Human	Q96D15	3 - unspecific	Reticulocalbin-3	RCN3_HUMAN	no	57333	RCN3	1	2	0	0	0	#N/A
Human	Q99538	3 - unspecific	Legumain	LGMN_HUMAN	no	5641	LGMN	1	5	0	0	0	#N/A
Human	Q9H3G5	3 - unspecific	Probable serine carboxypeptidase CPVL	CPVL_HUMAN	no	54504	CPVL	1	3	0	0	0	#N/A
Human	Q9UHG3	3 - unspecific	Prenylcysteine oxidase 1	PCYOX_HUMAN	no	51449	PCYOX1	1	18	0	0	0	#N/A
Human	Q9Y4L1	3 - unspecific	Hypoxia up-regulated protein 1	HYOU1_HUMAN	no	10525	HYOU1	1	40	0	0	0	#N/A
Human	Q9Y680	3 - unspecific	Peptidyl-prolyl cis-trans isomerase FKBP7	FKBP7_HUMAN	no	51661	FKBP7	1	7	0	0	0	#N/A
Human	O43707	3 - unspecific	Alpha-actinin-4	ACTN4_HUMAN	no	81	ACTN4	1	17	0	0	0	#N/A
Human	P02545	3 - unspecific	Lamin-A/C	LMNA_HUMAN	no	4000	LMNA	1	14	0	0	0	#N/A
Human	P04220	3 - unspecific	Ig mu heavy chain disease protein	MUCB_HUMAN	no	0	0	1	1	0	0	0	#N/A
Human	P04406	3 - unspecific	Glyceraldehyde-3-phosphate dehydrogenase	G3P_HUMAN	no	2597	GAPDH	1	28	0	0	0	#N/A
Human	P05387	3 - unspecific	60S acidic ribosomal protein P2	RLA2_HUMAN	no	6181	RPLP2	1	21	0	0	0	#N/A
Human	P08238	3 - unspecific	Heat shock protein HSP 90-beta	HS90B_HUMAN	no	3326	HSP90AB1	1	18	0	0	0	#N/A
Human	P08670	3 - unspecific	Vimentin	VIME_HUMAN	no	7431	VIM	1	32	0	0	0	#N/A
Human	P10809	3 - unspecific	60 kDa heat shock protein, mitochondrial	CH60_HUMAN	no	3329	HSPD1	1	29	0	0	0	#N/A
Human	P11142	3 - unspecific	Heat shock cognate 71 kDa protein	HSP7C_HUMAN	no	3312	HSPA8	1	23	0	0	0	#N/A
Human	P12956	3 - unspecific	ATP-dependent DNA helicase 2 subunit 1	KU70_HUMAN	no	2547	XRCC6	1	13	0	0	0	#N/A
Human	P14618	3 - unspecific	Pyruvate kinase isozymes M1/M2	KPYM_HUMAN	no	5315	PKM2	1	32	0	0	0	#N/A
Human	P18077	3 - unspecific	60S ribosomal protein L35a	RL35A_HUMAN	no	6165	RPL35A	1	13	0	0	0	#N/A
Human	P27348	3 - unspecific	14-3-3 protein theta	1433T_HUMAN	no	10971	YWHAQ	1	11	0	0	0	#N/A
Human	P29692	3 - unspecific	Elongation factor 1-delta	EF1D_HUMAN	no	1936	EEF1D	1	4	0	0	0	#N/A
Human	P32969	3 - unspecific	60S ribosomal protein L9	RL9_HUMAN	no	6133	RPL9	1	8	0	0	0	#N/A
Human	P35579	3 - unspecific	Myosin-9	MYH9_HUMAN	no	4627	MYH9	1	20	0	0	0	#N/A
Human	P39023	3 - unspecific	60S ribosomal protein L3	RL3_HUMAN	no	6122	RPL3	1	21	0	0	0	#N/A
Human	P45880	3 - unspecific	Voltage-dependent anion-selective channel protein 2	VDAC2_HUMAN	no	7417	VDAC2	1	15	0	0	0	#N/A
Human	P46778	3 - unspecific	60S ribosomal protein L21	RL21_HUMAN	no	6144	RPL21	1	8	0	0	0	#N/A
Human	P48735	3 - unspecific	Isocitrate dehydrogenase [NADP], mitochondrial	IDHP_HUMAN	no	3418	IDH2	1	9	0	0	0	#N/A
Human	P60174	3 - unspecific	Triosephosphate isomerase	TPIS_HUMAN	no	7167	TPI1	1	19	0	0	0	#N/A
Human	P62266	3 - unspecific	40S ribosomal protein S23	RS23_HUMAN	no	6228	RPS23	1	13	0	0	0	#N/A
Human	P62910	3 - unspecific	60S ribosomal protein L32	RL32_HUMAN	no	6161	RPL32	1	13	0	0	0	#N/A
Human	P68104	3 - unspecific	Elongation factor 1-alpha 1	EF1A1_HUMAN	no	1915	EEF1A1	1	34	0	0	0	#N/A
Human	P84098	3 - unspecific	60S ribosomal protein L19	RL19_HUMAN	no	6143	RPL19	1	8	0	0	0	#N/A
Human	P84103	3 - unspecific	Splicing factor, arginine/serine-rich 3	SFRS3_HUMAN	no	6428	SFRS3	1	7	0	0	0	#N/A
Human	Q07020	3 - unspecific	60S ribosomal protein L18	RL18_HUMAN	no	6141	RPL18	1	23	0	0	0	#N/A
Human	Q15366	3 - unspecific	Poly(rC)-binding protein 2	PCBP2_HUMAN	no	5094	PCBP2	1	3	0	0	0	#N/A
Human	Q92791	3 - unspecific	Synaptonemal complex protein SC65	SC65_HUMAN	no	10609	SC65	1	9	0	0	0	#N/A
Human	Q9Y6N5	3 - unspecific	Sulfide:quinone oxidoreductase, mitochondrial	SQRD_HUMAN	no	58472	SQRDL	1	4	0	0	0	#N/A
Human	P46779	3 - unspecific	60S ribosomal protein L28	RL28_HUMAN	no	6158	RPL28	0.9999	12	0	0	0	#N/A
Human	P61513	3 - unspecific	60S ribosomal protein L37a	RL37A_HUMAN	no	6168	RPL37A	0.9999	12	0	0	0	#N/A
Human	P62244	3 - unspecific	40S ribosomal protein S15a	RS15A_HUMAN	no	6210	RPS15A	0.9999	7	0	0	0	#N/A
Human	Q00839	3 - unspecific	Heterogeneous nuclear ribonucleoprotein U	HNRPU_HUMAN	no	3192	HNRNPU	0.9999	15	0	0	0	#N/A
Human	Q96AE7	3 - unspecific	Tetratricopeptide repeat protein 17	TTC17_HUMAN	no	55761	TTC17	0.9998	5	0	0	0	#N/A
Human	P20718	3 - unspecific	Granzyme H	GRAH_HUMAN	no	2999	GZMH	0.9996	1	0	0	0	#N/A
Human	P26599	3 - unspecific	Polypyrimidine tract-binding protein 1	PTBP1_HUMAN	no	5725	PTBP1	0.9996	2	0	0	0	#N/A
Human	P11678	3 - unspecific	Eosinophil peroxidase	PERE_HUMAN	no	8288	EPX	0.9993	1	0	0	0	#N/A
Human	P50454	3 - unspecific	Serpin H1	SERPH_HUMAN	no	871	SERPINH1	0.9989	18	0	0	0	#N/A
Human	Q7Z2W4	3 - unspecific	Zinc finger CCCH-type antiviral protein 1	ZCCHV_HUMAN	no	56829	ZC3HAV1	0.9982	1	0	0	0	#N/A
Human	P01876	3 - unspecific	Ig alpha-1 chain C region	IGHA1_HUMAN	no	3493	IGHA1	0.9975	4	0	0	0	#N/A
Human	P16278	3 - unspecific	Beta-galactosidase	BGAL_HUMAN	no	2720	GLB1	0.9972	7	0	0	0	#N/A
Human	P49746	3 - unspecific	Thrombospondin-3	TSP3_HUMAN	no	7059	THBS3	0.9972	1	0	0	0	#N/A
Human	Q02083	3 - unspecific	N-acylethanolamine-hydrolyzing acid amidase	NAAA_HUMAN	no	27163	NAAA	0.9972	2	0	0	0	#N/A
Human	Q5T4B2	3 - unspecific	Glycosyltransferase 25 family member 3	GT253_HUMAN	no	51148	CERCAM	0.9972	3	0	0	0	#N/A
Human	Q9H173	3 - unspecific	Nucleotide exchange factor SIL1	SIL1_HUMAN	no	64374	SIL1	0.9972	6	0	0	0	#N/A
Human	Q9H497	3 - unspecific	Torsin-3A	TOR3A_HUMAN	no	64222	TOR3A	0.9972	3	0	0	0	#N/A
Human	P42766	3 - unspecific	60S ribosomal protein L35	RL35_HUMAN	no	11224	RPL35	0.9972	12	0	0	0	#N/A
Human	P49588	3 - unspecific	Alanyl-tRNA synthetase, cytoplasmic	SYAC_HUMAN	no	16	AARS	0.9971	2	0	0	0	#N/A
Human	O14773	3 - unspecific	Tripeptidyl-peptidase 1	TPP1_HUMAN	no	1200	TPP1	0.997	6	0	0	0	#N/A
Human	Q9H1A3	3 - unspecific	Methyltransferase-like protein 9	METL9_HUMAN	no	51108	METTL9	0.997	4	0	0	0	#N/A
Human	P14649	3 - unspecific	Myosin light chain 6B	MYL6B_HUMAN	no	140465	MYL6B	0.9968	5	0	0	0	#N/A
Human	O60911	3 - unspecific	Cathepsin L2	CATL2_HUMAN	no	1515	CTSL2	0.9967	1	0	0	0	#N/A
Human	Q9BZQ6	3 - unspecific	ER degradation-enhancing alpha-mannosidase-like 3	EDEM3_HUMAN	no	80267	EDEM3	0.9967	4	0	0	0	#N/A
Human	O15460	3 - unspecific	Prolyl 4-hydroxylase subunit alpha-2	P4HA2_HUMAN	no	8974	P4HA2	0.9966	10	0	0	0	#N/A
Human	O95302	3 - unspecific	Peptidyl-prolyl cis-trans isomerase FKBP9	FKBP9_HUMAN	no	11328	FKBP9	0.9966	6	0	0	0	#N/A
Human	P07686	3 - unspecific	Beta-hexosaminidase subunit beta	HEXB_HUMAN	no	3074	HEXB	0.9966	5	0	0	0	#N/A
Human	Q99623	3 - unspecific	Prohibitin-2	PHB2_HUMAN	no	11331	PHB2	0.9966	17	0	0	0	#N/A
Human	P50897	3 - unspecific	Palmitoyl-protein thioesterase 1	PPT1_HUMAN	no	5538	PPT1	0.9964	5	0	0	0	#N/A
Human	Q9Y2G5	3 - unspecific	GDP-fucose protein O-fucosyltransferase 2	OFUT2_HUMAN	no	23275	POFUT2	0.9964	5	0	0	0	#N/A
Human	P07711	3 - unspecific	Cathepsin L1	CATL1_HUMAN	no	1514	CTSL1	0.9956	8	0	0	0	#N/A
Human	P08236	3 - unspecific	Beta-glucuronidase	BGLR_HUMAN	no	2990	GUSB	0.9956	18	0	0	0	#N/A
Human	P17050	3 - unspecific	Alpha-N-acetylgalactosaminidase	NAGAB_HUMAN	no	4668	NAGA	0.9956	2	0	0	0	#N/A
Human	P43235	3 - unspecific	Cathepsin K	CATK_HUMAN	no	1513	CTSK	0.9956	2	0	0	0	#N/A
Human	Q8NBK3	3 - unspecific	Sulfatase-modifying factor 1	SUMF1_HUMAN	no	285362	SUMF1	0.9956	8	0	0	0	#N/A
Human	Q9NWM8	3 - unspecific	Peptidyl-prolyl cis-trans isomerase FKBP14	FKB14_HUMAN	no	55033	FKBP14	0.9956	1	0	0	0	#N/A
Human	Q9NS25	3 - unspecific	Sperm protein associated with the nucleus on the X chromosome B/F	SPNXB_HUMAN	no	728695	SPANXB1	0.9956	3	0	0	0	#N/A
Human	O14657	3 - unspecific	Torsin-1B	TOR1B_HUMAN	no	27348	TOR1B	0.9952	6	0	0	0	#N/A
Human	P34059	3 - unspecific	N-acetylgalactosamine-6-sulfatase	GALNS_HUMAN	no	2588	GALNS	0.9952	1	0	0	0	#N/A
Human	Q9NYU1	3 - unspecific	UDP-glucose:glycoprotein glucosyltransferase 2	UGGG2_HUMAN	no	55757	UGGT2	0.9952	1	0	0	0	#N/A
Human	P46776	3 - unspecific	60S ribosomal protein L27a	RL27A_HUMAN	no	6157	RPL27A	0.9945	18	0	0	0	#N/A
Human	P49915	3 - unspecific	GMP synthase [glutamine-hydrolyzing]	GUAA_HUMAN	no	8833	GMPS	0.9945	1	0	0	0	#N/A
Human	P06865	3 - unspecific	Beta-hexosaminidase subunit alpha	HEXA_HUMAN	no	3073	HEXA	0.9943	9	0	0	0	#N/A
Human	Q8IVL1	3 - unspecific	Neuron navigator 2	NAV2_HUMAN	no	89797	NAV2	0.994	1	0	0	0	#N/A
Human	Q5D862	3 - unspecific	Filaggrin-2	FILA2_HUMAN	no	388698	FLG2	0.9937	1	0	0	0	#N/A
Human	O00116	3 - unspecific	Alkyldihydroxyacetonephosphate synthase, peroxisomal	ADAS_HUMAN	no	8540	AGPS	0.9933	2	0	0	0	#N/A
Human	P06280	3 - unspecific	Alpha-galactosidase A	AGAL_HUMAN	no	2717	GLA	0.993	3	0	0	0	#N/A
Human	P15848	3 - unspecific	Arylsulfatase B	ARSB_HUMAN	no	411	ARSB	0.993	3	0	0	0	#N/A
Human	P62316	3 - unspecific	Small nuclear ribonucleoprotein Sm D2	SMD2_HUMAN	no	6633	SNRPD2	0.9928	7	0	0	0	#N/A
Human	A2BFH1	3 - unspecific	Peptidylprolyl cis-trans isomerase A-like 4A	PAL4A_HUMAN	no	164022	PPIAL4A	0.9924	3	0	0	0	#N/A
Human	O76021	3 - unspecific	Ribosomal L1 domain-containing protein 1	RL1D1_HUMAN	no	26156	RSL1D1	0.9924	4	0	0	0	#N/A
Human	P37802	3 - unspecific	Transgelin-2	TAGL2_HUMAN	no	8407	TAGLN2	0.992	4	0	0	0	#N/A
Human	Q12931	3 - unspecific	Heat shock protein 75 kDa, mitochondrial	TRAP1_HUMAN	no	10131	TRAP1	0.992	5	0	0	0	#N/A
Human	Q9UQ80	3 - unspecific	Proliferation-associated protein 2G4	PA2G4_HUMAN	no	5036	PA2G4	0.9919	13	0	0	0	#N/A
Human	Q9UMR5	3 - unspecific	Lysosomal thioesterase PPT2	PPT2_HUMAN	no	9374	PPT2	0.9916	4	0	0	0	#N/A
Human	O00567	3 - unspecific	Nucleolar protein 56	NOP56_HUMAN	no	10528	NOP56	0.9916	5	0	0	0	#N/A
Human	Q9Y222	3 - unspecific	Cyclin-D-binding Myb-like transcription factor 1	DMTF1_HUMAN	no	9988	DMTF1	0.9913	14	0	0	0	#N/A
Human	O14556	3 - unspecific	Glyceraldehyde-3-phosphate dehydrogenase, testis-specific	G3PT_HUMAN	no	26330	GAPDHS	0.9901	4	0	0	0	#N/A
Human	P08246	3 - unspecific	Neutrophil elastase	ELNE_HUMAN	no	1991	ELANE	0.99	4	0	0	0	#N/A
Human	P57721	3 - unspecific	Poly(rC)-binding protein 3	PCBP3_HUMAN	no	54039	PCBP3	0.99	3	0	0	0	#N/A
Human	Q8IW19	3 - unspecific	Aprataxin and PNK-like factor	APLF_HUMAN	no	200558	APLF	0.9898	2	0	0	0	#N/A
Human	P07900	3 - unspecific	Heat shock protein HSP 90-alpha	HS90A_HUMAN	no	3320	HSP90AA1	0.9886	9	0	0	0	#N/A
Human	Q08AG5	3 - unspecific	Zinc finger protein 844	ZN844_HUMAN	no	284391	ZNF844	0.9837	15	0	0	0	#N/A
Human	P46100	3 - unspecific	Transcriptional regulator ATRX	ATRX_HUMAN	no	546	ATRX	0.9784	1	0	0	0	#N/A
Human	Q9GZY0	3 - unspecific	Nuclear RNA export factor 2	NXF2_HUMAN	no	56001	NXF2	0.9707	2	0	0	0	#N/A
Human	P50991	3 - unspecific	T-complex protein 1 subunit delta	TCPD_HUMAN	no	10575	CCT4	0.9479	10	0	0	0	#N/A
Human	Q9UKA4	3 - unspecific	A-kinase anchor protein 11	AKA11_HUMAN	no	11215	AKAP11	0.9451	7	0	0	0	#N/A
Human	A8MYG8	3 - unspecific	Putative ankyrin repeat domain-containing protein ENSP00000383069	YN011_HUMAN	no	100132257	0	0.9442	1	0	0	0	#N/A
Human	P18621	3 - unspecific	60S ribosomal protein L17	RL17_HUMAN	no	6139	RPL17	0.9423	5	0	0	0	#N/A
Human	Q9UKM9	3 - unspecific	RNA-binding protein Raly	RALY_HUMAN	no	22913	RALY	0.9287	3	0	0	0	#N/A
Human	Q9UK39	3 - unspecific	Nocturnin	NOCT_HUMAN	no	25819	CCRN4L	0.9252	1	0	0	0	#N/A
Human	Q9NR09	3 - unspecific	Baculoviral IAP repeat-containing protein 6	BIRC6_HUMAN	no	57448	BIRC6	0.9208	19	0	0	0	#N/A
Human	Q96A58	3 - unspecific	Ras-related and estrogen-regulated growth inhibitor	RERG_HUMAN	no	85004	RERG	0.92	2	0	0	0	#N/A
Human	Q8N543	3 - unspecific	2-oxoglutarate and iron-dependent oxygenase domain-containing protein 1	OGFD1_HUMAN	no	55239	OGFOD1	0.9177	2	0	0	0	#N/A
Human	Q07343	3 - unspecific	cAMP-specific 3',5'-cyclic phosphodiesterase 4B	PDE4B_HUMAN	no	5142	PDE4B	0.9064	19	0	0	0	#N/A
Human	Q9NQ48	3 - unspecific	Leucine zipper transcription factor-like protein 1	LZTL1_HUMAN	no	54585	LZTFL1	0.9019	1	0	0	0	#N/A
Human	Q9H1Z4	3 - unspecific	WD repeat-containing protein 13	WDR13_HUMAN	no	64743	WDR13	0.89	1	0	0	0	#N/A
Human	P55210	3 - unspecific	Caspase-7	CASP7_HUMAN	no	840	CASP7	0.8093	1	0	0	0	#N/A
Human	Q9Y520	3 - unspecific	Protein BAT2-like 2	BA2L2_HUMAN	no	23215	BAT2L2	0.8019	1	0	0	0	#N/A
Human	Q96CB8	3 - unspecific	Integrator complex subunit 12	INT12_HUMAN	no	57117	INTS12	0.7931	1	0	0	0	#N/A
Human	Q9Y5P6	3 - unspecific	Mannose-1-phosphate guanyltransferase beta	GMPPB_HUMAN	no	29925	GMPPB	0.7729	1	0	0	0	#N/A
Human	Q9H330	2 - putative	Transmembrane protein C9orf5	CI005_HUMAN	no	23731	C9orf5	1	17	1	16	0	#N/A
Human	O95477	2 - putative	ATP-binding cassette sub-family A member 1	ABCA1_HUMAN	no	19	ABCA1	1	18	1	14	0	#N/A
Human	P30825	2 - putative	High affinity cationic amino acid transporter 1	CTR1_HUMAN	no	6541	SLC7A1	1	43	1	14	0	#N/A
Human	P53794	2 - putative	Sodium/myo-inositol cotransporter	SC5A3_HUMAN	no	6526	SLC5A3	1	13	1	13	0	#N/A
Human	Q8N697	2 - putative	Solute carrier family 15 member 4	S15A4_HUMAN	no	121260	SLC15A4	1	16	1	13	0	#N/A
Human	A7MBM2	2 - putative	Protein dispatched homolog 2	DISP2_HUMAN	no	85455	DISP2	1	3	1	12	0	#N/A
Human	O15439	2 - putative	Multidrug resistance-associated protein 4	MRP4_HUMAN	no	10257	ABCC4	1	4	1	12	0	#N/A
Human	O15440	2 - putative	Multidrug resistance-associated protein 5	MRP5_HUMAN	no	10057	ABCC5	1	20	1	12	0	#N/A
Human	O43306	2 - putative	Adenylate cyclase type 6	ADCY6_HUMAN	no	112	ADCY6	1	2	1	12	0	#N/A
Human	O60266	2 - putative	Adenylate cyclase type 3	ADCY3_HUMAN	no	109	ADCY3	1	16	1	12	0	#N/A
Human	O60503	2 - putative	Adenylate cyclase type 9	ADCY9_HUMAN	no	115	ADCY9	1	37	1	12	0	#N/A
Human	O60779	2 - putative	Thiamine transporter 1	S19A2_HUMAN	no	10560	SLC19A2	1	28	1	12	0	#N/A
Human	O75387	2 - putative	Large neutral amino acids transporter small subunit 3	LAT3_HUMAN	no	8501	SLC43A1	1	6	1	12	0	#N/A
Human	P22732	2 - putative	Solute carrier family 2, facilitated glucose transporter member 5	GTR5_HUMAN	no	6518	SLC2A5	1	10	1	12	0	#N/A
Human	P48029	2 - putative	Sodium- and chloride-dependent creatine transporter 1	SC6A8_HUMAN	no	6535	SLC6A8	1	15	1	12	0	#N/A
Human	P48067	2 - putative	Sodium- and chloride-dependent glycine transporter 1	SC6A9_HUMAN	no	6536	SLC6A9	1	21	1	12	0	#N/A
Human	P49281	2 - putative	Natural resistance-associated macrophage protein 2	NRAM2_HUMAN	no	4891	SLC11A2	1	32	1	12	0	#N/A
Human	P55011	2 - putative	Solute carrier family 12 member 2	S12A2_HUMAN	no	6558	SLC12A2	1	35	1	12	0	#N/A
Human	Q13635	2 - putative	Protein patched homolog 1	PTC1_HUMAN	no	5727	PTCH1	1	4	1	12	0	#N/A
Human	Q16348	2 - putative	Solute carrier family 15 member 2	S15A2_HUMAN	no	6565	SLC15A2	1	1	1	12	0	#N/A
Human	Q5BKX6	2 - putative	Solute carrier family 45 member 4	S45A4_HUMAN	no	57210	SLC45A4	1	7	1	12	0	#N/A
Human	Q8NBI5	2 - putative	Solute carrier family 43 member 3	S43A3_HUMAN	no	29015	SLC43A3	1	31	1	12	0	#N/A
Human	Q96QE2	2 - putative	Proton myo-inositol cotransporter	MYCT_HUMAN	no	114134	SLC2A13	1	9	1	12	0	#N/A
Human	Q9H2J7	2 - putative	Orphan sodium- and chloride-dependent neurotransmitter transporter NTT73	S6A15_HUMAN	no	55117	SLC6A15	1	8	1	12	0	#N/A
Human	Q9H2X9	2 - putative	Solute carrier family 12 member 5	S12A5_HUMAN	no	57468	SLC12A5	1	1	1	12	0	#N/A
Human	Q9UMX9	2 - putative	Membrane-associated transporter protein	S45A2_HUMAN	no	51151	SLC45A2	1	1	1	12	0	#N/A
Human	Q9UN76	2 - putative	Sodium- and chloride-dependent neutral and basic amino acid transporter B(0+)	S6A14_HUMAN	no	11254	SLC6A14	1	1	1	12	0	#N/A
Human	P41440	2 - putative	Folate transporter 1	S19A1_HUMAN	no	6573	SLC19A1	1	34	1	11	0	#N/A
Human	Q5T3F8	2 - putative	Transmembrane protein 63B	TM63B_HUMAN	no	55362	TMEM63B	1	11	1	11	0	#N/A
Human	Q8IZM9	2 - putative	Probable sodium-coupled neutral amino acid transporter 6	S38A6_HUMAN	no	145389	SLC38A6	1	1	1	11	0	#N/A
Human	Q8NBW4	2 - putative	Putative sodium-coupled neutral amino acid transporter 9	S38A9_HUMAN	no	153129	SLC38A9	1	2	1	11	0	#N/A
Human	Q68DH5	2 - putative	LMBR1 domain-containing protein 2	LMBD2_HUMAN	no	92255	LMBRD2	1	8	1	10	0	#N/A
Human	Q6YBV0	2 - putative	Proton-coupled amino acid transporter 4	S36A4_HUMAN	no	120103	SLC36A4	1	10	1	10	0	#N/A
Human	Q8IWA5	2 - putative	Choline transporter-like protein 2	CTL2_HUMAN	no	57153	SLC44A2	1	47	1	10	0	#N/A
Human	Q9BXS9	2 - putative	Solute carrier family 26 member 6	S26A6_HUMAN	no	65010	SLC26A6	1	11	1	10	0	#N/A
Human	P43007	2 - putative	Neutral amino acid transporter A	SATT_HUMAN	no	6509	SLC1A4	1	43	1	9	0	#N/A
Human	Q15758	2 - putative	Neutral amino acid transporter B(0)	AAAT_HUMAN	no	6510	SLC1A5	1	38	1	9	0	#N/A
Human	P50443	2 - putative	Sulfate transporter	S26A2_HUMAN	no	1836	SLC26A2	1	27	1	8	0	#N/A
Human	P43003	2 - putative	Excitatory amino acid transporter 1	EAA1_HUMAN	no	6507	SLC1A3	1	8	1	7	0	#N/A
Human	Q6ZUK4	2 - putative	Transmembrane protein 26	TMM26_HUMAN	no	219623	TMEM26	1	5	1	7	0	#N/A
Human	P29972	2 - putative	Aquaporin-1	AQP1_HUMAN	no	358	AQP1	1	5	1	6	0	#N/A
Human	Q9C0K1	2 - putative	Zinc transporter ZIP8	S39A8_HUMAN	no	64116	SLC39A8	1	10	1	6	0	#N/A
Human	O14524	2 - putative	Transmembrane protein 194A	T194A_HUMAN	no	23306	TMEM194A	1	7	1	5	0	#N/A
Human	O95858	2 - putative	Tetraspanin-15	TSN15_HUMAN	no	23555	TSPAN15	1	13	1	5	0	#N/A
Human	O14817	2 - putative	Tetraspanin-4	TSN4_HUMAN	no	7106	TSPAN4	1	6	1	4	0	#N/A
Human	O43657	2 - putative	Tetraspanin-6	TSN6_HUMAN	no	7105	TSPAN6	1	20	1	4	0	#N/A
Human	O60637	2 - putative	Tetraspanin-3	TSN3_HUMAN	no	10099	TSPAN3	1	40	1	4	0	#N/A
Human	O95857	2 - putative	Tetraspanin-13	TSN13_HUMAN	no	27075	TSPAN13	1	21	1	4	0	#N/A
Human	P19075	2 - putative	Tetraspanin-8	TSN8_HUMAN	no	7103	TSPAN8	1	14	1	4	0	#N/A
Human	P54849	2 - putative	Epithelial membrane protein 1	EMP1_HUMAN	no	2012	EMP1	1	16	1	4	0	#N/A
Human	Q6P9F7	2 - putative	Leucine-rich repeat-containing protein 8B	LRC8B_HUMAN	no	23507	LRRC8B	1	9	1	4	0	#N/A
Human	Q86UF1	2 - putative	Tetraspanin-33	TSN33_HUMAN	no	340348	TSPAN33	1	6	1	4	0	#N/A
Human	Q8IWT6	2 - putative	Leucine-rich repeat-containing protein 8A	LRC8A_HUMAN	no	56262	LRRC8A	1	23	1	4	0	#N/A
Human	Q8TDW0	2 - putative	Leucine-rich repeat-containing protein 8C	LRC8C_HUMAN	no	84230	LRRC8C	1	5	1	4	0	#N/A
Human	P54852	2 - putative	Epithelial membrane protein 3	EMP3_HUMAN	no	2014	EMP3	1	32	1	3	0	#N/A
Human	Q7Z7N9	2 - putative	Transmembrane protein 179B	T179B_HUMAN	no	374395	TMEM179B	1	2	1	3	0	#N/A
Human	Q9NY35	2 - putative	Claudin domain-containing protein 1	CLDN1_HUMAN	no	56650	CLDND1	1	46	1	3	0	#N/A
Human	Q3MIR4	2 - putative	Cell cycle control protein 50B	CC50B_HUMAN	no	161291	TMEM30B	1	1	1	2	0	#N/A
Human	Q92545	2 - putative	Transmembrane protein 131	TM131_HUMAN	no	23505	TMEM131	1	5	1	2	0	#N/A
Human	Q9H813	2 - putative	Transmembrane protein 206	TM206_HUMAN	no	55248	TMEM206	1	39	1	2	0	#N/A
Human	Q9HCM3	2 - putative	UPF0606 protein KIAA1549	K1549_HUMAN	no	57670	KIAA1549	1	8	1	2	0	#N/A
Human	Q9NV96	2 - putative	Cell cycle control protein 50A	CC50A_HUMAN	no	55754	TMEM30A	1	34	1	2	0	#N/A
Human	Q9NWD8	2 - putative	UPF0458 protein C7orf42	CG042_HUMAN	no	55069	C7orf42	1	13	1	2	0	#N/A
Human	A2RU67	2 - putative	Uncharacterized protein KIAA1467	K1467_HUMAN	no	57613	KIAA1467	1	6	1	1	0	#N/A
Human	P01848	2 - putative	T-cell receptor alpha chain C region	TCA_HUMAN	no	28755	TRAC	1	3	1	1	0	#N/A
Human	P01850	2 - putative	T-cell receptor beta chain C region	TCB_HUMAN	no	28639	TRBC1	1	3	1	1	0	#N/A
Human	P01908	2 - putative	HLA class II histocompatibility antigen, DQ(1) alpha chain	HA21_HUMAN	no	0	0	1	8	1	1	0	#N/A
Human	Q06643	2 - putative	Lymphotoxin-beta	TNFC_HUMAN	no	4050	LTB	1	2	1	1	0	#N/A
Human	Q58DX5	2 - putative	Inactive N-acetylated-alpha-linked acidic dipeptidase-like protein 2	NADL2_HUMAN	no	254827	NAALADL2	1	3	1	1	0	#N/A
Human	Q68CR1	2 - putative	Protein sel-1 homolog 3	SE1L3_HUMAN	no	23231	SEL1L3	1	7	1	1	0	#N/A
Human	Q6N022	2 - putative	Teneurin-4	TEN4_HUMAN	no	26011	ODZ4	1	10	1	1	0	#N/A
Human	Q6NSJ0	2 - putative	Uncharacterized family 31 glucosidase KIAA1161	K1161_HUMAN	no	57462	KIAA1161	1	10	1	1	0	#N/A
Human	Q6P4E1	2 - putative	Protein CASC4	CASC4_HUMAN	no	113201	CASC4	1	26	1	1	0	#N/A
Human	Q8NC01	2 - putative	C-type lectin domain family 1 member A	CLC1A_HUMAN	no	51267	CLEC1A	1	1	1	1	0	#N/A
Human	Q96BZ4	2 - putative	Phospholipase D4	PLD4_HUMAN	no	122618	PLD4	1	5	1	1	0	#N/A
Human	Q9H0X4	2 - putative	Protein ITFG3	ITFG3_HUMAN	no	83986	ITFG3	1	46	1	1	0	#N/A
Human	Q9H1C3	2 - putative	Glycosyltransferase 8 domain-containing protein 2	GL8D2_HUMAN	no	83468	GLT8D2	1	2	1	1	0	#N/A
Human	Q9HDC9	2 - putative	Adipocyte plasma membrane-associated protein	APMAP_HUMAN	no	57136	APMAP	1	26	1	1	0	#N/A
Human	Q9NUM4	2 - putative	Transmembrane protein 106B	T106B_HUMAN	no	54664	TMEM106B	1	13	1	1	0	#N/A
Human	Q9NX62	2 - putative	Inositol monophosphatase 3	IMPA3_HUMAN	no	54928	IMPAD1	1	13	1	1	0	#N/A
Human	Q9NZS2	2 - putative	Killer cell lectin-like receptor subfamily F member 1	KLRF1_HUMAN	no	51348	KLRF1	1	1	1	1	0	#N/A
Human	Q9P273	2 - putative	Teneurin-3	TEN3_HUMAN	no	55714	ODZ3	1	23	1	1	0	#N/A
Human	Q9UHN6	2 - putative	Transmembrane protein 2	TMEM2_HUMAN	no	23670	TMEM2	1	36	1	1	0	#N/A
Human	Q9Y5L3	2 - putative	Ectonucleoside triphosphate diphosphohydrolase 2	ENTP2_HUMAN	no	954	ENTPD2	1	3	1	1	0	#N/A
Human	Q9Y5Y6	2 - putative	Suppressor of tumorigenicity 14 protein	ST14_HUMAN	no	6768	ST14	1	5	1	1	0	#N/A
Human	Q9Y6H6	2 - putative	Potassium voltage-gated channel subfamily E member 3	KCNE3_HUMAN	no	10008	KCNE3	1	3	1	1	0	#N/A
Human	O76082	2 - putative	Solute carrier family 22 member 5	S22A5_HUMAN	no	6584	SLC22A5	0.9999	36	1	12	0	#N/A
Human	O94886	2 - putative	Transmembrane protein 63A	TM63A_HUMAN	no	9725	TMEM63A	0.9999	4	1	9	0	#N/A
Human	Q9P2C4	2 - putative	Transmembrane protein 181	TM181_HUMAN	no	57583	TMEM181	0.9996	16	1	8	0	#N/A
Human	Q9UKU6	2 - putative	Thyrotropin-releasing hormone-degrading ectoenzyme	TRHDE_HUMAN	no	29953	TRHDE	0.9991	1	1	1	0	#N/A
Human	O96005	2 - putative	Cleft lip and palate transmembrane protein 1	CLPT1_HUMAN	no	1209	CLPTM1	0.9988	20	1	5	0	#N/A
Human	Q8IYP9	2 - putative	Probable palmitoyltransferase ZDHHC23	ZDH23_HUMAN	no	254887	ZDHHC23	0.998	1	1	6	0	#N/A
Human	Q9BXT2	2 - putative	Voltage-dependent calcium channel gamma-6 subunit	CCG6_HUMAN	no	59285	CACNG6	0.9972	3	1	4	0	#N/A
Human	P22314	2 - putative	Ubiquitin-like modifier-activating enzyme 1	UBA1_HUMAN	no	7317	UBA1	0.9972	3	1	1	0	#N/A
Human	Q9H015	2 - putative	Solute carrier family 22 member 4	S22A4_HUMAN	no	6583	SLC22A4	0.9971	7	1	12	0	#N/A
Human	Q12999	2 - putative	Tetraspanin-31	TSN31_HUMAN	no	6302	TSPAN31	0.9967	3	1	4	0	#N/A
Human	Q7Z388	2 - putative	Protein dpy-19 homolog 4	D19L4_HUMAN	no	286148	DPY19L4	0.9964	4	1	12	0	#N/A
Human	P13866	2 - putative	Sodium/glucose cotransporter 1	SC5A1_HUMAN	no	6523	SLC5A1	0.996	1	1	14	0	#N/A
Human	Q8WY22	2 - putative	BRI3-binding protein	BRI3B_HUMAN	no	140707	BRI3BP	0.996	2	1	3	0	#N/A
Human	Q8NE00	2 - putative	Transmembrane protein 104	TM104_HUMAN	no	54868	TMEM104	0.9957	1	1	9	0	#N/A
Human	O43462	2 - putative	Membrane-bound transcription factor site-2 protease	MBTP2_HUMAN	no	51360	MBTPS2	0.9957	7	1	7	0	#N/A
Human	P51788	2 - putative	Chloride channel protein 2	CLCN2_HUMAN	no	1181	CLCN2	0.9952	7	1	12	0	#N/A
Human	Q9NRM0	2 - putative	Solute carrier family 2, facilitated glucose transporter member 9	GTR9_HUMAN	no	56606	SLC2A9	0.9949	2	1	12	0	#N/A
Human	Q99250	2 - putative	Sodium channel protein type 2 subunit alpha	SCN2A_HUMAN	no	6326	SCN2A	0.9946	3	1	22	0	#N/A
Human	A1A5C7	2 - putative	Solute carrier family 22 member 23	S22AN_HUMAN	no	63027	SLC22A23	0.9946	4	1	11	0	#N/A
Human	A6NKL6	2 - putative	Transmembrane protein TTMA	TTMA_HUMAN	no	645369	TTMA	0.9946	3	1	2	0	#N/A
Human	Q14DG7	2 - putative	Transmembrane protein 132B	T132B_HUMAN	no	114795	TMEM132B	0.9946	3	1	1	0	#N/A
Human	Q04941	2 - putative	Proteolipid protein 2	PLP2_HUMAN	no	5355	PLP2	0.9943	11	1	4	0	#N/A
Human	Q99571	2 - putative	P2X purinoceptor 4	P2RX4_HUMAN	no	5025	P2RX4	0.9942	12	1	2	0	#N/A
Human	Q9BZC7	2 - putative	ATP-binding cassette sub-family A member 2	ABCA2_HUMAN	no	20	ABCA2	0.994	6	1	14	0	#N/A
Human	Q9P1W3	2 - putative	Transmembrane protein 63C	TM63C_HUMAN	no	57156	TMEM63C	0.994	4	1	9	0	#N/A
Human	Q8NCS7	2 - putative	Choline transporter-like protein 5	CTL5_HUMAN	no	204962	SLC44A5	0.9934	1	1	9	0	#N/A
Human	Q8NG11	2 - putative	Tetraspanin-14	TSN14_HUMAN	no	81619	TSPAN14	0.9934	2	1	4	0	#N/A
Human	Q9P126	2 - putative	C-type lectin domain family 1 member B	CLC1B_HUMAN	no	51266	CLEC1B	0.9934	2	1	1	0	#N/A
Human	Q92887	2 - putative	Canalicular multispecific organic anion transporter 1	MRP2_HUMAN	no	1244	ABCC2	0.9933	6	1	16	0	#N/A
Human	Q6ZS10	2 - putative	C-type lectin and transmembrane domain-containing protein FLJ45910	YS008_HUMAN	no	388512	0	0.9928	1	1	1	0	#N/A
Human	Q96T54	2 - putative	Potassium channel subfamily K member 17	KCNKH_HUMAN	no	89822	KCNK17	0.9927	1	1	6	0	#N/A
Human	O75071	2 - putative	EF-hand domain-containing protein KIAA0494	K0494_HUMAN	no	9813	KIAA0494	0.9924	5	1	1	0	#N/A
Human	P48066	2 - putative	Sodium- and chloride-dependent GABA transporter 3	S6A11_HUMAN	no	6538	SLC6A11	0.9922	1	1	12	0	#N/A
Human	Q12767	2 - putative	Uncharacterized protein KIAA0195	K0195_HUMAN	no	9772	KIAA0195	0.9921	9	1	10	0	#N/A
Human	O43688	2 - putative	Lipid phosphate phosphohydrolase 2	LPP2_HUMAN	no	8612	PPAP2C	0.992	17	1	6	0	#N/A
Human	Q5KU26	2 - putative	Collectin-12	COL12_HUMAN	no	81035	COLEC12	0.9919	18	1	1	0	#N/A
Human	Q12809	2 - putative	Potassium voltage-gated channel subfamily H member 2	KCNH2_HUMAN	no	3757	KCNH2	0.9916	1	1	5	0	#N/A
Human	Q30167	2 - putative	HLA class II histocompatibility antigen, DR-1 beta chain	HB2C_HUMAN	no	0	0	0.991	2	1	1	0	#N/A
Human	Q9H5K3	2 - putative	Protein kinase-like protein SgK196	SG196_HUMAN	no	84197	SGK196	0.9909	1	1	1	0	#N/A
Human	Q96SJ8	2 - putative	Tetraspanin-18	TSN18_HUMAN	no	90139	TSPAN18	0.9908	2	1	4	0	#N/A
Human	P23975	2 - putative	Sodium-dependent noradrenaline transporter	SC6A2_HUMAN	no	6530	SLC6A2	0.9901	2	1	12	0	#N/A
Human	Q7Z402	2 - putative	Transmembrane channel-like protein 7	TMC7_HUMAN	no	79905	TMC7	0.99	2	1	9	0	#N/A
Human	Q96KA5	2 - putative	Cleft lip and palate transmembrane protein 1-like protein	CLP1L_HUMAN	no	81037	CLPTM1L	0.99	3	1	6	0	#N/A
Human	Q69YZ2	2 - putative	Transmembrane protein 200B	T200B_HUMAN	no	399474	TMEM200B	0.9893	3	1	2	0	#N/A
Human	Q9H5I5	2 - putative	Protein FAM38B	FA38B_HUMAN	no	63895	FAM38B	0.9892	1	1	4	0	#N/A
Human	Q8IX19	2 - putative	Mast cell-expressed membrane protein 1	MCEM1_HUMAN	no	199675	MCEMP1	0.9886	1	1	1	0	#N/A
Human	P81408	2 - putative	Protein FAM189B	F189B_HUMAN	no	10712	FAM189B	0.9884	7	1	4	0	#N/A
Human	O60636	2 - putative	Tetraspanin-2	TSN2_HUMAN	no	10100	TSPAN2	0.9872	3	1	4	0	#N/A
Human	P54851	2 - putative	Epithelial membrane protein 2	EMP2_HUMAN	no	2013	EMP2	0.9861	3	1	3	0	#N/A
Human	P51575	2 - putative	P2X purinoceptor 1	P2RX1_HUMAN	no	5023	P2RX1	0.9859	2	1	2	0	#N/A
Human	Q9Y210	2 - putative	Short transient receptor potential channel 6	TRPC6_HUMAN	no	7225	TRPC6	0.9856	2	1	8	0	#N/A
Human	P51828	2 - putative	Adenylate cyclase type 7	ADCY7_HUMAN	no	113	ADCY7	0.9845	3	1	12	0	#N/A
Human	P52569	2 - putative	Low affinity cationic amino acid transporter 2	CTR2_HUMAN	no	6542	SLC7A2	0.9831	8	1	14	0	#N/A
Human	Q8IZA0	2 - putative	Uncharacterized protein KIAA0319-like	K319L_HUMAN	no	79932	KIAA0319L	0.9831	7	1	2	0	#N/A
Human	Q8N468	2 - putative	Major facilitator superfamily domain-containing protein 4	MFSD4_HUMAN	no	148808	MFSD4	0.9699	1	1	12	0	#N/A
Human	Q01118	2 - putative	Sodium channel protein type 7 subunit alpha	SCN7A_HUMAN	no	6332	SCN7A	0.9698	2	1	21	0	#N/A
Human	Q5SGD2	2 - putative	Protein phosphatase 1L	PPM1L_HUMAN	no	151742	PPM1L	0.9646	4	1	1	0	#N/A
Human	Q8N614	2 - putative	Transmembrane protein 156	TM156_HUMAN	no	80008	TMEM156	0.96	2	1	2	0	#N/A
Human	Q9ULH0	2 - putative	Kinase D-interacting substrate of 220 kDa	KDIS_HUMAN	no	57498	KIDINS220	0.9547	1	1	4	0	#N/A
Human	O75954	2 - putative	Tetraspanin-9	TSN9_HUMAN	no	10867	TSPAN9	0.9506	2	1	4	0	#N/A
Human	Q15413	2 - putative	Ryanodine receptor 3	RYR3_HUMAN	no	6263	RYR3	0.94	8	1	7	0	#N/A
Human	P56180	2 - putative	Putative tyrosine-protein phosphatase TPTE	TPTE_HUMAN	no	7179	TPTE	0.904	1	1	4	0	#N/A
Human	P37059	2 - putative	Estradiol 17-beta-dehydrogenase 2	DHB2_HUMAN	no	3294	HSD17B2	0.9033	1	1	1	0	#N/A
Human	P04920	2 - putative	Anion exchange protein 2	B3A2_HUMAN	no	6522	SLC4A2	0.88	1	1	13	0	#N/A
Human	Q7Z3F1	2 - putative	Integral membrane protein GPR155	GP155_HUMAN	no	151556	GPR155	0.82	6	1	17	0	#N/A
Human	P46977	2 - putative	Dolichyl-diphosphooligosaccharide--protein glycosyltransferase subunit STT3A	STT3A_HUMAN	no	3703	STT3A	1	27	1	13	0	#N/A
Human	Q8TCJ2	2 - putative	Dolichyl-diphosphooligosaccharide--protein glycosyltransferase subunit STT3B	STT3B_HUMAN	no	201595	STT3B	1	34	1	13	0	#N/A
Human	Q8IVB4	2 - putative	Sodium/hydrogen exchanger 9	SL9A9_HUMAN	no	285195	SLC9A9	1	2	1	12	0	#N/A
Human	Q9UKY4	2 - putative	Protein O-mannosyl-transferase 2	POMT2_HUMAN	no	29954	POMT2	1	3	1	12	0	#N/A
Human	Q9BU23	2 - putative	Lipase maturation factor 2	LMF2_HUMAN	no	91289	LMF2	1	11	1	11	0	#N/A
Human	Q68CP4	2 - putative	Heparan-alpha-glucosaminide N-acetyltransferase	HGNAT_HUMAN	no	138050	HGSNAT	1	10	1	11	0	#N/A
Human	Q9Y6A1	2 - putative	Protein O-mannosyl-transferase 1	POMT1_HUMAN	no	10585	POMT1	1	6	1	11	0	#N/A
Human	Q9NRX5	2 - putative	Serine incorporator 1	SERC1_HUMAN	no	57515	SERINC1	1	14	1	10	0	#N/A
Human	Q9NUN5	2 - putative	Probable lysosomal cobalamin transporter	LMBD1_HUMAN	no	55788	LMBRD1	1	22	1	9	0	#N/A
Human	Q93050	2 - putative	V-type proton ATPase 116 kDa subunit a isoform 1	VPP1_HUMAN	no	535	ATP6V0A1	1	18	1	8	0	#N/A
Human	Q6ZMG9	2 - putative	LAG1 longevity assurance homolog 6	LASS6_HUMAN	no	253782	LASS6	1	2	1	7	0	#N/A
Human	P38435	2 - putative	Vitamin K-dependent gamma-carboxylase	VKGC_HUMAN	no	2677	GGCX	1	3	1	6	0	#N/A
Human	Q8WTR4	2 - putative	Glycerophosphodiester phosphodiesterase domain-containing protein 5	GDPD5_HUMAN	no	81544	GDPD5	1	7	1	6	0	#N/A
Human	Q7Z3C6	2 - putative	Autophagy-related protein 9A	ATG9A_HUMAN	no	79065	ATG9A	1	29	1	4	0	#N/A
Human	Q16563	2 - putative	Synaptophysin-like protein 1	SYPL1_HUMAN	no	6856	SYPL1	1	42	1	3	0	#N/A
Human	Q96G97	2 - putative	Seipin	BSCL2_HUMAN	no	26580	BSCL2	1	3	1	3	0	#N/A
Human	Q9NQC3	2 - putative	Reticulon-4	RTN4_HUMAN	no	57142	RTN4	1	10	1	3	0	#N/A
Human	Q3T906	2 - putative	N-acetylglucosamine-1-phosphotransferase subunits alpha/beta	GNPTA_HUMAN	no	79158	GNPTAB	1	21	1	2	0	#N/A
Human	Q14108	2 - putative	Lysosome membrane protein 2	SCRB2_HUMAN	no	950	SCARB2	1	34	1	1	0	#N/A
Human	Q6AZY7	2 - putative	Scavenger receptor class A member 3	SCAR3_HUMAN	no	51435	SCARA3	1	6	1	1	0	#N/A
Human	Q8IV08	2 - putative	Phospholipase D3	PLD3_HUMAN	no	23646	PLD3	1	23	1	1	0	#N/A
Human	O00461	2 - putative	Golgi integral membrane protein 4	GOLI4_HUMAN	no	27333	GOLIM4	1	13	1	1	0	#N/A
Human	O43909	2 - putative	Exostosin-like 3	EXTL3_HUMAN	no	2137	EXTL3	1	6	1	1	0	#N/A
Human	O75396	2 - putative	Vesicle-trafficking protein SEC22b	SC22B_HUMAN	no	9554	SEC22B	1	6	1	1	0	#N/A
Human	P09172	2 - putative	Dopamine beta-hydroxylase	DOPO_HUMAN	no	1621	DBH	1	1	1	1	0	#N/A
Human	P21333	2 - putative	Filamin-A	FLNA_HUMAN	no	2316	FLNA	1	21	1	1	0	#N/A
Human	P49641	2 - putative	Alpha-mannosidase 2x	MA2A2_HUMAN	no	4122	MAN2A2	1	4	1	1	0	#N/A
Human	Q09328	2 - putative	Alpha-1,6-mannosylglycoprotein 6-beta-N-acetylglucosaminyltransferase A	MGT5A_HUMAN	no	4249	MGAT5	1	10	1	1	0	#N/A
Human	Q16706	2 - putative	Alpha-mannosidase 2	MA2A1_HUMAN	no	4124	MAN2A1	1	10	1	1	0	#N/A
Human	Q70UQ0	2 - putative	Inhibitor of nuclear factor kappa-B kinase-interacting protein	IKIP_HUMAN	no	121457	IKIP	1	11	1	1	0	#N/A
Human	Q96AQ6	2 - putative	Pre-B-cell leukemia transcription factor-interacting protein 1	PBIP1_HUMAN	no	57326	PBXIP1	1	8	1	1	0	#N/A
Human	Q9NPC4	2 - putative	Lactosylceramide 4-alpha-galactosyltransferase	A4GAT_HUMAN	no	53947	A4GALT	1	1	1	1	0	#N/A
Human	Q9NRB3	2 - putative	Carbohydrate sulfotransferase 12	CHSTC_HUMAN	no	55501	CHST12	1	11	1	1	0	#N/A
Human	Q9NY97	2 - putative	UDP-GlcNAc:betaGal beta-1,3-N-acetylglucosaminyltransferase 2	B3GN2_HUMAN	no	10678	B3GNT2	1	10	1	1	0	#N/A
Human	Q9Y274	2 - putative	Type 2 lactosamine alpha-2,3-sialyltransferase	SIA10_HUMAN	no	10402	ST3GAL6	1	3	1	1	0	#N/A
Human	P51797	2 - putative	Chloride transport protein 6	CLCN6_HUMAN	no	1185	CLCN6	0.9998	1	1	12	0	#N/A
Human	Q4ZIN3	2 - putative	Membralin	MBRL_HUMAN	no	91304	C19orf6	0.9972	9	1	6	0	#N/A
Human	Q96G23	2 - putative	LAG1 longevity assurance homolog 2	LASS2_HUMAN	no	29956	LASS2	0.997	5	1	6	0	#N/A
Human	Q9H5J4	2 - putative	Elongation of very long chain fatty acids protein 6	ELOV6_HUMAN	no	79071	ELOVL6	0.9967	1	1	7	0	#N/A
Human	Q5H8A4	2 - putative	GPI ethanolamine phosphate transferase 2	PIGG_HUMAN	no	54872	PIGG	0.9957	2	1	13	0	#N/A
Human	Q9NQZ7	2 - putative	Ectonucleoside triphosphate diphosphohydrolase 7	ENTP7_HUMAN	no	57089	ENTPD7	0.9957	2	1	2	0	#N/A
Human	Q7LGC8	2 - putative	Carbohydrate sulfotransferase 3	CHST3_HUMAN	no	9469	CHST3	0.9957	1	1	1	0	#N/A
Human	Q8WVQ1	2 - putative	Soluble calcium-activated nucleotidase 1	CANT1_HUMAN	no	124583	CANT1	0.9957	2	1	1	0	#N/A
Human	Q99941	2 - putative	Cyclic AMP-dependent transcription factor ATF-6 beta	ATF6B_HUMAN	no	1388	ATF6B	0.9957	1	1	1	0	#N/A
Human	O95427	2 - putative	GPI ethanolamine phosphate transferase 1	PIGN_HUMAN	no	23556	PIGN	0.9956	3	1	15	0	#N/A
Human	Q75T13	2 - putative	GPI inositol-deacylase	PGAP1_HUMAN	no	80055	PGAP1	0.9956	5	1	8	0	#N/A
Human	Q12770	2 - putative	Sterol regulatory element-binding protein cleavage-activating protein	SCAP_HUMAN	no	22937	SCAP	0.9956	12	1	7	0	#N/A
Human	Q13563	2 - putative	Polycystin-2	PKD2_HUMAN	no	5311	PKD2	0.9952	2	1	7	0	#N/A
Human	O60931	2 - putative	Cystinosin	CTNS_HUMAN	no	1497	CTNS	0.9952	7	1	7	0	#N/A
Human	Q96S52	2 - putative	GPI transamidase component PIG-S	PIGS_HUMAN	no	94005	PIGS	0.9952	22	1	2	0	#N/A
Human	Q8IY17	2 - putative	Neuropathy target esterase	PLPL6_HUMAN	no	10908	PNPLA6	0.9952	1	1	1	0	#N/A
Human	Q96T83	2 - putative	Sodium/hydrogen exchanger 7	SL9A7_HUMAN	no	84679	SLC9A7	0.9946	31	1	13	0	#N/A
Human	O60635	2 - putative	Tetraspanin-1	TSN1_HUMAN	no	10103	TSPAN1	0.9946	1	1	4	0	#N/A
Human	P28845	2 - putative	Corticosteroid 11-beta-dehydrogenase isozyme 1	DHI1_HUMAN	no	3290	HSD11B1	0.9942	1	1	1	0	#N/A
Human	Q12797	2 - putative	Aspartyl/asparaginyl beta-hydroxylase	ASPH_HUMAN	no	444	ASPH	0.9942	22	1	1	0	#N/A
Human	Q8NHS3	2 - putative	Major facilitator superfamily domain-containing protein 8	MFSD8_HUMAN	no	256471	MFSD8	0.994	5	1	12	0	#N/A
Human	Q9Y2C2	2 - putative	Uronyl 2-sulfotransferase	UST_HUMAN	no	10090	UST	0.994	4	1	1	0	#N/A
Human	Q14643	2 - putative	Inositol 1,4,5-trisphosphate receptor type 1	ITPR1_HUMAN	no	3708	ITPR1	0.9937	4	1	7	0	#N/A
Human	Q8WWZ7	2 - putative	ATP-binding cassette sub-family A member 5	ABCA5_HUMAN	no	23461	ABCA5	0.993	3	1	16	0	#N/A
Human	Q9BVX2	2 - putative	Transmembrane protein 106C	T106C_HUMAN	no	79022	TMEM106C	0.9928	2	1	2	0	#N/A
Human	Q13286	2 - putative	Battenin	CLN3_HUMAN	no	1201	CLN3	0.9872	2	1	9	0	#N/A
Human	Q3V5L5	2 - putative	Alpha-1,6-mannosylglycoprotein 6-beta-N-acetylglucosaminyltransferase B	MGT5B_HUMAN	no	146664	MGAT5B	0.9854	2	1	1	0	#N/A
Human	Q7Z2K6	2 - putative	Endoplasmic reticulum metallopeptidase 1	ERMP1_HUMAN	no	79956	ERMP1	0.9853	6	1	10	0	#N/A
Human	Q9UNP4	2 - putative	Lactosylceramide alpha-2,3-sialyltransferase	SIAT9_HUMAN	no	8869	ST3GAL5	0.9848	2	1	1	0	#N/A
Human	Q8NCW6	2 - putative	Polypeptide N-acetylgalactosaminyltransferase 11	GLT11_HUMAN	no	63917	GALNT11	0.9805	4	1	1	0	#N/A
Human	Q14573	2 - putative	Inositol 1,4,5-trisphosphate receptor type 3	ITPR3_HUMAN	no	3710	ITPR3	0.9771	3	1	7	0	#N/A
Human	Q8NFQ8	2 - putative	Torsin-1A-interacting protein 2	TOIP2_HUMAN	no	163590	TOR1AIP2	0.9586	12	1	1	0	#N/A
Human	Q9GZR5	2 - putative	Elongation of very long chain fatty acids protein 4	ELOV4_HUMAN	no	6785	ELOVL4	0.9533	8	1	7	0	#N/A
Human	Q8WXF7	2 - putative	Atlastin-1	ATLA1_HUMAN	no	51062	ATL1	0.9466	4	1	2	0	#N/A
Human	Q8IY34	2 - putative	Solute carrier family 15 member 3	S15A3_HUMAN	no	51296	SLC15A3	0.8789	1	1	12	0	#N/A
Human	P10253	2 - putative	Lysosomal alpha-glucosidase	LYAG_HUMAN	no	2548	GAA	1	10	1	1	0	#N/A
Human	Q9NYU2	2 - putative	UDP-glucose:glycoprotein glucosyltransferase 1	UGGG1_HUMAN	no	56886	UGGT1	1	3	1	1	0	#N/A
Human	Q8NC56	2 - putative	LEM domain-containing protein 2	LEMD2_HUMAN	no	221496	LEMD2	1	3	1	2	0	#N/A
Human	Q9UNW1	2 - putative	Multiple inositol polyphosphate phosphatase 1	MINP1_HUMAN	no	9562	MINPP1	0.9972	3	1	2	0	#N/A
Human	P17405	2 - putative	Sphingomyelin phosphodiesterase	ASM_HUMAN	no	6609	SMPD1	0.9957	1	1	1	0	#N/A
Human	P51690	2 - putative	Arylsulfatase E	ARSE_HUMAN	no	415	ARSE	0.9952	2	1	2	0	#N/A
Human	O75503	2 - putative	Ceroid-lipofuscinosis neuronal protein 5	CLN5_HUMAN	no	1203	CLN5	0.9944	2	1	1	0	#N/A
Human	Q9UH99	2 - putative	Protein unc-84 homolog B	UN84B_HUMAN	no	25777	UNC84B	0.9943	21	1	3	0	#N/A
Human	Q5JTV8	2 - putative	Torsin-1A-interacting protein 1	TOIP1_HUMAN	no	26092	TOR1AIP1	0.9555	2	1	1	0	#N/A
Human	P09110	2 - putative	3-ketoacyl-CoA thiolase, peroxisomal	THIK_HUMAN	no	30	ACAA1	0.9305	3	1	1	0	#N/A
Human	O94901	2 - putative	Protein unc-84 homolog A	UN84A_HUMAN	no	23353	UNC84A	0.9155	8	1	2	0	#N/A

## Sheet: Table B
organism	ID_link	CSPA category	UP_Protein_name	UP_entry_name	CD	ENTREZ_gene_ID	ENTREZ gene symbol	protein probability	count detection in different cell types	Phobius TM predicted yes/no	# predicted TM domains	GPI	UniProt cell surface
Mouse	Q61391	1 - high confidence	Neprilysin	NEP_MOUSE	CD10	17380	Mme	1	13	1	1	0	yes
Mouse	O09126	1 - high confidence	Semaphorin-4D	SEM4D_MOUSE	CD100	20354	Sema4d	1	22	1	1	0	yes
Mouse	A8E0Y8	1 - high confidence	Immunoglobulin superfamily member 2	IGSF2_MOUSE	CD101	630146	Cd101	1	3	1	1	0	yes
Mouse	P35330	1 - high confidence	Intercellular adhesion molecule 2	ICAM2_MOUSE	CD102	15896	Icam2	1	9	1	1	0	yes
Mouse	Q60677	1 - high confidence	Integrin alpha-E	ITAE_MOUSE	CD103	16407	Itgae	0.9949	1	1	1	0	yes
Mouse	A2A863	1 - high confidence	Integrin beta-4	ITB4_MOUSE	CD104	192897	Itgb4	1	2	1	1	0	yes
Mouse	Q63961	1 - high confidence	Endoglin	EGLN_MOUSE	CD105	13805	Eng	1	9	1	1	0	yes
Mouse	P29533	1 - high confidence	Vascular cell adhesion protein 1	VCAM1_MOUSE	CD106	22329	Vcam1	1	16	1	1	1	yes
Mouse	P11438	1 - high confidence	Lysosome-associated membrane glycoprotein 1	LAMP1_MOUSE	CD107a	16783	Lamp1	1	28	1	1	0	yes
Mouse	P17047	1 - high confidence	Lysosome-associated membrane glycoprotein 2	LAMP2_MOUSE	CD107b	16784	Lamp2	1	28	1	1	0	yes
Mouse	Q9QUR8	1 - high confidence	Semaphorin-7A	SEM7A_MOUSE	CD108	20361	Sema7a	1	5	1	1	1	yes
Mouse	Q8R422	1 - high confidence	CD109 antigen	CD109_MOUSE	CD109	235505	Cd109	1	8	0	0	1	yes
Mouse	Q9JKF6	1 - high confidence	Poliovirus receptor-related protein 1	PVRL1_MOUSE	CD111	58235	Pvrl1	1	23	1	1	0	yes
Mouse	P32507	1 - high confidence	Poliovirus receptor-related protein 2	PVRL2_MOUSE	CD112	19294	Pvrl2	1	22	1	1	0	yes
Mouse	Q9JLB9	1 - high confidence	Poliovirus receptor-related protein 3	PVRL3_MOUSE	CD113	58998	Pvrl3	1	16	1	1	0	yes
Mouse	P09581	1 - high confidence	Macrophage colony-stimulating factor 1 receptor	CSF1R_MOUSE	CD115	12978	Csf1r	1	3	1	1	0	yes
Mouse	Q00941	1 - high confidence	Granulocyte-macrophage colony-stimulating factor receptor subunit alpha	CSF2R_MOUSE	CD116	12982	Csf2ra	1	9	1	1	0	yes
Mouse	P05532	1 - high confidence	Mast/stem cell growth factor receptor	KIT_MOUSE	CD117	16590	Kit	0.9966	6	1	1	0	yes
Mouse	P42703	1 - high confidence	Leukemia inhibitory factor receptor	LIFR_MOUSE	CD118	16880	Lifr	1	15	1	1	0	yes
Mouse	P24063	1 - high confidence	Integrin alpha-L	ITAL_MOUSE	CD11a	16408	Itgal	0.9999	11	1	1	0	yes
Mouse	P05555	1 - high confidence	Integrin alpha-M	ITAM_MOUSE	CD11b	16409	Itgam	1	8	1	1	0	yes
Mouse	Q9QXH4	1 - high confidence	Integrin alpha-X	ITAX_MOUSE	CD11c	16411	Itgax	1	1	1	1	0	yes
Mouse	Q3V0T4	1 - high confidence	Integrin alpha-D	ITAD_MOUSE	CD11d	381924	Itgad	1	2	1	1	0	yes
Mouse	P13504	1 - high confidence	Interleukin-1 receptor type 1	IL1R1_MOUSE	CD121a	16177	Il1r1	1	1	1	1	0	yes
Mouse	P27931	1 - high confidence	Interleukin-1 receptor type 2	IL1R2_MOUSE	CD121b	16178	Il1r2	1	2	1	1	0	yes
Mouse	P26952	1 - high confidence	Interleukin-3 receptor subunit alpha	IL3RA_MOUSE	CD123	16188	Il3ra	1	11	1	1	0	yes
Mouse	P16382	1 - high confidence	Interleukin-4 receptor subunit alpha	IL4RA_MOUSE	CD124	16190	Il4r	0.9966	5	1	1	0	yes
Mouse	P22272	1 - high confidence	Interleukin-6 receptor subunit alpha	IL6RA_MOUSE	CD126	16194	Il6ra	0.9813	2	1	1	0	yes
Mouse	P16872	1 - high confidence	Interleukin-7 receptor subunit alpha	IL7RA_MOUSE	CD127	16197	Il7r	1	3	1	1	0	yes
Mouse	P97449	3 - unspecific	Aminopeptidase N	AMPN_MOUSE	CD13	16790	Anpep	1	24	0	0	0	#N/A
Mouse	Q00560	1 - high confidence	Interleukin-6 receptor subunit beta	IL6RB_MOUSE	CD130	16195	Il6st	1	19	1	1	0	yes
Mouse	P34902	1 - high confidence	Cytokine receptor common subunit gamma	IL2RG_MOUSE	CD132	16186	Il2rg	1	3	1	1	0	yes
Mouse	O54990	1 - high confidence	Prominin-1	PROM1_MOUSE	CD133	19126	Prom1	1	15	1	5	0	yes
Mouse	P47741	1 - high confidence	Tumor necrosis factor receptor superfamily member 4	TNR4_MOUSE	CD134	22163	Tnfrsf4	1	2	1	1	0	yes
Mouse	P20334	1 - high confidence	Tumor necrosis factor receptor superfamily member 9	TNR9_MOUSE	CD137	21942	Tnfrsf9	0.9954	1	1	1	0	yes
Mouse	P10810	1 - high confidence	Monocyte differentiation antigen CD14	CD14_MOUSE	CD14	12475	Cd14	1	11	0	0	1	yes
Mouse	P26618	1 - high confidence	Alpha-type platelet-derived growth factor receptor	PGFRA_MOUSE	CD140a	18595	Pdgfra	0.9986	2	1	1	0	yes
Mouse	P05622	1 - high confidence	Beta-type platelet-derived growth factor receptor	PGFRB_MOUSE	CD140b	18596	Pdgfrb	1	11	1	1	0	yes
Mouse	P15306	1 - high confidence	Thrombomodulin	TRBM_MOUSE	CD141	21824	Thbd	1	7	1	1	0	yes
Mouse	P20352	1 - high confidence	Tissue factor	TF_MOUSE	CD142	14066	F3	1	21	1	1	0	yes
Mouse	P09470	1 - high confidence	Angiotensin-converting enzyme	ACE_MOUSE	CD143	11421	Ace	1	3	1	1	0	yes
Mouse	P55284	1 - high confidence	Cadherin-5	CADH5_MOUSE	CD144	12562	Cdh5	0.9898	3	1	1	0	yes
Mouse	Q8R2Y2	1 - high confidence	Cell surface glycoprotein MUC18	MUC18_MOUSE	CD146	84004	Mcam	1	16	1	1	0	yes
Mouse	P18572	1 - high confidence	Basigin	BASI_MOUSE	CD147	12215	Bsg	1	31	1	1	0	yes
Mouse	Q64455	1 - high confidence	Receptor-type tyrosine-protein phosphatase eta	PTPRJ_MOUSE	CD148	19271	Ptprj	1	29	1	1	0	yes
Mouse	Q9QUM4	1 - high confidence	Signaling lymphocytic activation molecule	SLAF1_MOUSE	CD150	27218	Slamf1	1	3	1	1	0	yes
Mouse	O35566	2 - putative	CD151 antigen	CD151_MOUSE	CD151	12476	Cd151	1	10	1	4	0	#N/A
Mouse	P09793	1 - high confidence	Cytotoxic T-lymphocyte protein 4	CTLA4_MOUSE	CD152	12477	Ctla4	1	2	1	1	0	yes
Mouse	P32972	2 - putative	Tumor necrosis factor ligand superfamily member 8	TNFL8_MOUSE	CD153	21949	Tnfsf8	0.9938	1	1	1	0	#N/A
Mouse	Q9Z0F8	1 - high confidence	Disintegrin and metalloproteinase domain-containing protein 17	ADA17_MOUSE	CD156b	11491	Adam17	1	17	1	1	0	yes
Mouse	O35598	1 - high confidence	Disintegrin and metalloproteinase domain-containing protein 10	ADA10_MOUSE	CD156c	11487	Adam10	1	27	1	1	0	yes
Mouse	Q64277	1 - high confidence	ADP-ribosyl cyclase 2	BST1_MOUSE	CD157	12182	Bst1	1	5	0	0	1	yes
Mouse	Q2VLH6	1 - high confidence	Scavenger receptor cysteine-rich type 1 protein M130	C163A_MOUSE	CD163	93671	Cd163	1	2	1	1	0	yes
Mouse	Q9R0L9	1 - high confidence	Sialomucin core protein 24	MUC24_MOUSE	CD164	53599	Cd164	1	19	1	1	0	yes
Mouse	Q61490	1 - high confidence	CD166 antigen	CD166_MOUSE	CD166	11658	Alcam	1	28	1	1	0	yes
Mouse	Q62230	1 - high confidence	Sialoadhesin	SN_MOUSE	CD169	20612	Siglec1	1	6	1	1	0	yes
Mouse	P11627	1 - high confidence	Neural cell adhesion molecule L1	L1CAM_MOUSE	CD171	16728	L1cam	1	25	1	1	0	yes
Mouse	P97797	1 - high confidence	Tyrosine-protein phosphatase non-receptor type substrate 1	SHPS1_MOUSE	CD172a	19261	Sirpa	1	25	1	1	0	yes
Mouse	P11835	1 - high confidence	Integrin beta-2	ITB2_MOUSE	CD18	16414	Itgb2	1	13	1	1	0	yes
Mouse	Q62192	1 - high confidence	CD180 antigen	CD180_MOUSE	CD180	17079	Cd180	0.9999	3	1	1	0	yes
Mouse	Q04683	1 - high confidence	C-X-C chemokine receptor type 5	CXCR5_MOUSE	CD185	12145	Cxcr5	0.9933	2	1	7	0	yes
Mouse	P25918	1 - high confidence	B-lymphocyte antigen CD19	CD19_MOUSE	CD19	12478	Cd19	1	5	1	1	0	yes
Mouse	P51680	1 - high confidence	C-C chemokine receptor type 4	CCR4_MOUSE	CD194	12773	Ccr4	0.9954	3	1	7	0	yes
Mouse	P47774	1 - high confidence	C-C chemokine receptor type 7	CCR7_MOUSE	CD197	12775	Ccr7	1	2	1	6	0	yes
Mouse	P08920	1 - high confidence	T-cell surface antigen CD2	CD2_MOUSE	CD2	12481	Cd2	1	5	1	1	0	yes
Mouse	P19437	1 - high confidence	B-lymphocyte antigen CD20	CD20_MOUSE	CD20	12482	Ms4a1	1	1	1	4	0	yes
Mouse	O54901	1 - high confidence	OX-2 membrane glycoprotein	OX2G_MOUSE	CD200	17470	Cd200	1	13	1	1	0	yes
Mouse	Q64695	1 - high confidence	Endothelial protein C receptor	EPCR_MOUSE	CD201	19124	Procr	1	11	1	1	0	yes
Mouse	Q02858	1 - high confidence	Angiopoietin-1 receptor	TIE2_MOUSE	CD202b	0	Tek	0.99	1	1	1	0	yes
Mouse	P06802	1 - high confidence	Ectonucleotide pyrophosphatase/phosphodiesterase family member 1	ENPP1_MOUSE	CD203a	18605	Enpp1	1	23	1	1	0	yes
Mouse	Q6DYE8	1 - high confidence	Ectonucleotide pyrophosphatase/phosphodiesterase family member 3	ENPP3_MOUSE	CD203c	209558	Enpp3	1	16	1	1	0	yes
Mouse	P30204	2 - putative	Macrophage scavenger receptor types I and II	MSRE_MOUSE	CD204	20288	Msr1	1	10	1	1	0	#N/A
Mouse	Q60767	1 - high confidence	Lymphocyte antigen 75	LY75_MOUSE	CD205	17076	Ly75	1	21	1	1	0	yes
Mouse	Q61830	1 - high confidence	Macrophage mannose receptor 1	MRC1_MOUSE	CD206	17533	Mrc1	1	2	1	1	0	yes
Mouse	P19070	1 - high confidence	Complement receptor type 2	CR2_MOUSE	CD21	12902	Cr2	1	1	1	1	0	yes
Mouse	Q60837	1 - high confidence	Interleukin-12 receptor subunit beta-1	I12R1_MOUSE	CD212	16161	Il12rb1	0.9938	1	1	1	0	yes
Mouse	Q60943	1 - high confidence	Interleukin-17 receptor A	I17RA_MOUSE	CD217	16172	Il17ra	0.9963	4	1	1	0	yes
Mouse	Q61098	1 - high confidence	Interleukin-18 receptor 1	IL18R_MOUSE	CD218a	16182	Il18r1	1	4	1	1	0	yes
Mouse	P35329	1 - high confidence	B-cell receptor CD22	CD22_MOUSE	CD22	12483	Cd22	1	3	1	1	0	yes
Mouse	P15208	1 - high confidence	Insulin receptor	INSR_MOUSE	CD220	16337	Insr	1	31	1	1	0	yes
Mouse	Q60751	1 - high confidence	Insulin-like growth factor 1 receptor	IGF1R_MOUSE	CD221	16001	Igf1r	1	25	1	1	0	yes
Mouse	Q07113	1 - high confidence	Cation-independent mannose-6-phosphate receptor	MPRI_MOUSE	CD222	16004	Igf2r	1	22	1	1	0	yes
Mouse	Q61790	1 - high confidence	Lymphocyte activation gene 3 protein	LAG3_MOUSE	CD223	16768	Lag3	1	2	1	1	0	yes
Mouse	Q60928	2 - putative	Gamma-glutamyltranspeptidase 1	GGT1_MOUSE	CD224	14598	Ggt1	1	18	1	1	0	#N/A
Mouse	Q8K4F0	1 - high confidence	CD226 antigen	CD226_MOUSE	CD226	225825	Cd226	1	3	1	1	0	yes
Mouse	Q02496	1 - high confidence	Mucin-1	MUC1_MOUSE	CD227	17829	Muc1	0.9979	2	1	1	0	yes
Mouse	Q9R0R1	1 - high confidence	Melanotransferrin	TRFM_MOUSE	CD228	30060	Mfi2	1	2	1	1	1	yes
Mouse	Q01965	1 - high confidence	T-lymphocyte surface antigen Ly-9	LY9_MOUSE	CD229	17085	Ly9	1	6	1	2	0	yes
Mouse	P20693	1 - high confidence	Low affinity immunoglobulin epsilon Fc receptor	FCER2_MOUSE	CD23	14128	Fcer2	1	2	1	1	0	yes
Mouse	P04925	1 - high confidence	Major prion protein	PRIO_MOUSE	CD230	19122	Prnp	1	30	1	2	1	yes
Mouse	Q62283	2 - putative	Tetraspanin-7	TSN7_MOUSE	CD231	21912	Tspan7	1	4	1	4	0	#N/A
Mouse	Q9QZC2	1 - high confidence	Plexin-C1	PLXC1_MOUSE	CD232	54712	Plxnc1	1	5	1	2	0	yes
Mouse	P24807	1 - high confidence	Signal transducer CD24	CD24_MOUSE	CD24	12484	Cd24	1	27	0	0	1	yes
Mouse	Q9QUT0	2 - putative	Ammonium transporter Rh type A	RHAG_MOUSE	CD241	19743	Rhag	1	1	1	11	0	#N/A
Mouse	Q07763	1 - high confidence	Natural killer cell receptor 2B4	CD244_MOUSE	CD244	18106	Cd244	0.9945	2	1	1	0	yes
Mouse	P97793	1 - high confidence	ALK tyrosine kinase receptor	ALK_MOUSE	CD246	11682	Alk	0.9973	1	1	1	0	yes
Mouse	P16406	2 - putative	Glutamyl aminopeptidase	AMPE_MOUSE	CD249	13809	Enpep	1	4	1	1	0	#N/A
Mouse	P01590	1 - high confidence	Interleukin-2 receptor subunit alpha	IL2RA_MOUSE	CD25	16184	Il2ra	1	2	1	1	0	yes
Mouse	O35235	1 - high confidence	Tumor necrosis factor ligand superfamily member 11	TNF11_MOUSE	CD254	21943	Tnfsf11	1	2	1	1	0	yes
Mouse	P28843	1 - high confidence	Dipeptidyl peptidase 4	DPP4_MOUSE	CD26	13482	Dpp4	1	13	1	1	0	yes
Mouse	Q9QZM4	1 - high confidence	Tumor necrosis factor receptor superfamily member 10B	TR10B_MOUSE	CD262	21933	Tnfrsf10b	1	8	1	2	0	yes
Mouse	P41272	1 - high confidence	CD27 antigen	CD27_MOUSE	CD27	21940	Cd27	1	3	1	1	0	yes
Mouse	Q9WUL5	1 - high confidence	Programmed cell death 1 ligand 2	PD1L2_MOUSE	CD273	58205	Pdcd1lg2	0.9954	3	1	1	0	yes
Mouse	Q9EP73	1 - high confidence	Programmed cell death 1 ligand 1	PD1L1_MOUSE	CD274	60533	Cd274	0.9962	9	1	1	0	yes
Mouse	Q9JHJ8	1 - high confidence	ICOS ligand	ICOSL_MOUSE	CD275	50723	Icoslg	1	4	1	1	0	yes
Mouse	Q8VE98	1 - high confidence	CD276 antigen	CD276_MOUSE	CD276	102657	Cd276	1	24	1	1	0	yes
Mouse	Q02242	1 - high confidence	Programmed cell death protein 1	PDCD1_MOUSE	CD279	18566	Pdcd1	0.9034	2	1	1	0	yes
Mouse	P31041	1 - high confidence	T-cell-specific surface glycoprotein CD28	CD28_MOUSE	CD28	12487	Cd28	1	6	1	1	0	yes
Mouse	Q64449	1 - high confidence	C-type mannose receptor 2	MRC2_MOUSE	CD280	17534	Mrc2	1	17	1	1	0	yes
Mouse	Q9EPQ1	1 - high confidence	Toll-like receptor 1	TLR1_MOUSE	CD281	21897	Tlr1	1	5	1	2	0	yes
Mouse	Q9QUN7	1 - high confidence	Toll-like receptor 2	TLR2_MOUSE	CD282	24088	Tlr2	1	6	1	1	0	yes
Mouse	Q9QUK6	1 - high confidence	Toll-like receptor 4	TLR4_MOUSE	CD284	21898	Tlr4	0.9912	5	1	1	0	yes
Mouse	Q9EPW9	1 - high confidence	Toll-like receptor 6	TLR6_MOUSE	CD286	21899	Tlr6	0.9842	2	1	1	0	yes
Mouse	P58682	1 - high confidence	Toll-like receptor 8	TLR8_MOUSE	CD288	170744	Tlr8	0.9929	2	1	1	0	yes
Mouse	P09055	1 - high confidence	Integrin beta-1	ITB1_MOUSE	CD29	16412	Itgb1	1	31	1	1	0	yes
Mouse	P97370	1 - high confidence	Sodium/potassium-transporting ATPase subunit beta-3	AT1B3_MOUSE	CD298	11933	Atp1b3	1	30	1	1	0	yes
Mouse	Q60846	1 - high confidence	Tumor necrosis factor receptor superfamily member 8	TNR8_MOUSE	CD30	21941	Tnfrsf8	1	2	1	1	0	yes
Mouse	Q9DCG2	1 - high confidence	CD302 antigen	CD302_MOUSE	CD302	66205	Cd302	0.9886	3	1	1	0	yes
Mouse	P97333	1 - high confidence	Neuropilin-1	NRP1_MOUSE	CD304	18186	Nrp1	1	20	1	1	0	yes
Mouse	Q8BG84	1 - high confidence	Leukocyte-associated immunoglobulin-like receptor 1	LAIR1_MOUSE	CD305	52855	Lair1	1	4	1	1	0	yes
Mouse	P35918	1 - high confidence	Vascular endothelial growth factor receptor 2	VGFR2_MOUSE	CD309	16542	Kdr	0.9923	4	1	1	0	yes
Mouse	Q08481	1 - high confidence	Platelet endothelial cell adhesion molecule	PECA1_MOUSE	CD31	18613	Pecam1	1	22	1	1	0	yes
Mouse	Q9WV91	1 - high confidence	Prostaglandin F2 receptor negative regulator	FPRP_MOUSE	CD315	19221	Ptgfrn	1	24	1	1	0	yes
Mouse	Q8R366	1 - high confidence	Immunoglobulin superfamily member 8	IGSF8_MOUSE	CD316	140559	Igsf8	1	20	1	1	0	yes
Mouse	Q8R2Q8	1 - high confidence	Bone marrow stromal antigen 2	BST2_MOUSE	CD317	69550	Bst2	1	27	1	1	1	yes
Mouse	Q5U462	1 - high confidence	CUB domain-containing protein 1	CDCP1_MOUSE	CD318	109332	Cdcp1	1	3	1	1	0	yes
Mouse	P08101	1 - high confidence	Low affinity immunoglobulin gamma Fc region receptor II	FCGR2_MOUSE	CD32	14130	Fcgr2	1	11	1	1	0	yes
Mouse	Q9Z1P5	1 - high confidence	CD320 antigen	CD320_MOUSE	CD320	54219	Cd320	1	18	1	1	0	yes
Mouse	O88792	1 - high confidence	Junctional adhesion molecule A	JAM1_MOUSE	CD321	16456	F11r	1	25	1	1	0	yes
Mouse	Q9JI59	1 - high confidence	Junctional adhesion molecule B	JAM2_MOUSE	CD322	67374	Jam2	1	7	1	1	0	yes
Mouse	P09803	1 - high confidence	Cadherin-1	CADH1_MOUSE	CD324	12550	Cdh1	0.9583	6	1	1	0	yes
Mouse	P15116	1 - high confidence	Cadherin-2	CADH2_MOUSE	CD325	12558	Cdh2	1	21	1	1	0	yes
Mouse	Q99JW5	1 - high confidence	Epithelial cell adhesion molecule	EPCAM_MOUSE	CD326	17075	Epcam	1	11	1	1	0	yes
Mouse	Q63994	1 - high confidence	Myeloid cell surface antigen CD33	CD33_MOUSE	CD33	12489	Cd33	0.9999	1	1	1	0	yes
Mouse	P16092	1 - high confidence	Basic fibroblast growth factor receptor 1	FGFR1_MOUSE	CD331	14182	Fgfr1	1	21	1	1	0	yes
Mouse	P21803	1 - high confidence	Fibroblast growth factor receptor 2	FGFR2_MOUSE	CD332	14183	Fgfr2	1	6	1	1	0	yes
Mouse	Q61851	1 - high confidence	Fibroblast growth factor receptor 3	FGFR3_MOUSE	CD333	14184	Fgfr3	1	4	1	1	0	yes
Mouse	Q9QXX0	1 - high confidence	Protein jagged-1	JAG1_MOUSE	CD339	16449	Jag1	1	16	1	1	0	yes
Mouse	Q64314	1 - high confidence	Hematopoietic progenitor cell antigen CD34	CD34_MOUSE	CD34	12490	Cd34	1	13	1	1	0	yes
Mouse	P70424	1 - high confidence	Receptor tyrosine-protein kinase erbB-2	ERBB2_MOUSE	CD340	13866	Erbb2	1	9	1	1	0	yes
Mouse	Q9R216	1 - high confidence	Frizzled-9	FZD9_MOUSE	CD349	14371	Fzd9	1	2	1	7	0	yes
Mouse	Q08857	2 - putative	Platelet glycoprotein 4	CD36_MOUSE	CD36	12491	Cd36	1	19	1	2	0	#N/A
Mouse	Q61470	2 - putative	Leukocyte antigen CD37	CD37_MOUSE	CD37	12493	Cd37	1	5	1	4	0	#N/A
Mouse	P56528	2 - putative	ADP-ribosyl cyclase 1	CD38_MOUSE	CD38	12494	Cd38	1	20	1	1	0	#N/A
Mouse	P55772	2 - putative	Ectonucleoside triphosphate diphosphohydrolase 1	ENTP1_MOUSE	CD39	12495	Entpd1	1	13	1	2	0	#N/A
Mouse	P04235	1 - high confidence	T-cell surface glycoprotein CD3 delta chain	CD3D_MOUSE	CD3d	12500	Cd3d	0.9946	4	1	1	0	yes
Mouse	P11942	1 - high confidence	T-cell surface glycoprotein CD3 gamma chain	CD3G_MOUSE	CD3g	12502	Cd3g	0.9946	4	1	1	0	yes
Mouse	P06332	1 - high confidence	T-cell surface glycoprotein CD4	CD4_MOUSE	CD4	12504	Cd4	1	4	1	1	0	yes
Mouse	P27512	1 - high confidence	Tumor necrosis factor receptor superfamily member 5	TNR5_MOUSE	CD40	21939	Cd40	0.9883	6	1	1	0	yes
Mouse	O88186	1 - high confidence	Platelet glycoprotein IX	GPIX_MOUSE	CD42a	54368	Gp9	0.9771	1	1	1	0	yes
Mouse	O08742	1 - high confidence	Platelet glycoprotein V	GPV_MOUSE	CD42d	14729	Gp5	0.9763	1	1	1	0	yes
Mouse	P15379	1 - high confidence	CD44 antigen	CD44_MOUSE	CD44	12505	Cd44	1	22	1	1	0	yes
Mouse	P06800	1 - high confidence	Receptor-type tyrosine-protein phosphatase C	PTPRC_MOUSE	CD45	19264	Ptprc	1	7	1	1	0	yes
Mouse	Q61735	1 - high confidence	Leukocyte surface antigen CD47	CD47_MOUSE	CD47	16423	Cd47	1	28	1	5	0	yes
Mouse	P18181	1 - high confidence	CD48 antigen	CD48_MOUSE	CD48	12506	Cd48	1	8	0	0	1	yes
Mouse	Q3V3R4	1 - high confidence	Integrin alpha-1	ITA1_MOUSE	CD49a	109700	Itga1	1	20	1	1	0	yes
Mouse	Q62469	1 - high confidence	Integrin alpha-2	ITA2_MOUSE	CD49b	16398	Itga2	1	8	1	1	0	yes
Mouse	Q62470	1 - high confidence	Integrin alpha-3	ITA3_MOUSE	CD49c	16400	Itga3	1	25	1	1	0	yes
Mouse	Q00651	1 - high confidence	Integrin alpha-4	ITA4_MOUSE	CD49d	16401	Itga4	1	13	1	1	0	yes
Mouse	P11688	1 - high confidence	Integrin alpha-5	ITA5_MOUSE	CD49e	16402	Itga5	1	23	1	1	0	yes
Mouse	Q61739	1 - high confidence	Integrin alpha-6	ITA6_MOUSE	CD49f	16403	Itga6	1	27	1	1	0	yes
Mouse	P13379	1 - high confidence	T-cell surface glycoprotein CD5	CD5_MOUSE	CD5	12507	Cd5	1	3	1	1	0	yes
Mouse	P43406	1 - high confidence	Integrin alpha-V	ITAV_MOUSE	CD51	16410	Itgav	1	30	1	1	0	yes
Mouse	Q61451	2 - putative	Leukocyte surface antigen CD53	CD53_MOUSE	CD53	12508	Cd53	1	7	1	4	0	#N/A
Mouse	P13597	1 - high confidence	Intercellular adhesion molecule 1	ICAM1_MOUSE	CD54	15894	Icam1	1	28	1	1	0	yes
Mouse	P13595	1 - high confidence	Neural cell adhesion molecule 1	NCAM1_MOUSE	CD56	17967	Ncam1	1	25	1	1	1	yes
Mouse	Q61003	1 - high confidence	T-cell differentiation antigen CD6	CD6_MOUSE	CD6	12511	Cd6	1	4	1	1	0	yes
Mouse	O54890	1 - high confidence	Integrin beta-3	ITB3_MOUSE	CD61	16416	Itgb3	0.9999	5	1	1	0	yes
Mouse	P18337	1 - high confidence	L-selectin	LYAM1_MOUSE	CD62L	20343	Sell	1	3	1	1	0	yes
Mouse	P41731	1 - high confidence	CD63 antigen	CD63_MOUSE	CD63	12512	Cd63	1	19	1	4	0	yes
Mouse	P26151	1 - high confidence	High affinity immunoglobulin gamma Fc receptor I	FCGR1_MOUSE	CD64	14129	Fcgr1	1	4	1	1	0	yes
Mouse	P31809	1 - high confidence	Carcinoembryonic antigen-related cell adhesion molecule 1	CEAM1_MOUSE	CD66a	26365	Ceacam1	1	17	1	1	0	yes
Mouse	P37217	2 - putative	Early activation antigen CD69	CD69_MOUSE	CD69	12515	Cd69	1	5	1	1	0	#N/A
Mouse	Q62351	1 - high confidence	Transferrin receptor protein 1	TFR1_MOUSE	CD71	22042	Tfrc	1	26	1	1	0	yes
Mouse	P21855	2 - putative	B-cell differentiation antigen CD72	CD72_MOUSE	CD72	12517	Cd72	0.9945	5	1	1	0	#N/A
Mouse	Q7TSA3	1 - high confidence	B- and T-lymphocyte attenuator	BTLA_MOUSE	CD727	208154	Btla	1	2	1	1	0	yes
Mouse	Q61503	1 - high confidence	5'-nucleotidase	5NTD_MOUSE	CD73	23959	Nt5e	1	21	1	1	1	yes
Mouse	P04441	2 - putative	H-2 class II histocompatibility antigen gamma chain	HG2A_MOUSE	CD74	16149	Cd74	1	2	1	1	0	#N/A
Mouse	P11911	1 - high confidence	B-cell antigen receptor complex-associated protein alpha chain	CD79A_MOUSE	CD79a	12518	Cd79a	0.9949	1	1	1	0	yes
Mouse	P15530	1 - high confidence	B-cell antigen receptor complex-associated protein beta chain	CD79B_MOUSE	CD79b	15985	Cd79b	1	2	1	1	0	yes
Mouse	Q00609	1 - high confidence	T-lymphocyte activation antigen CD80	CD80_MOUSE	CD80	12519	Cd80	0.9966	19	1	1	0	yes
Mouse	P40237	2 - putative	CD82 antigen	CD82_MOUSE	CD82	12521	Cd82	1	11	1	4	0	#N/A
Mouse	Q18PI6	1 - high confidence	SLAM family member 5	SLAF5_MOUSE	CD84	12523	Cd84	1	5	1	1	0	yes
Mouse	Q64281	1 - high confidence	Leukocyte immunoglobulin-like receptor subfamily B member 4	LIRB4_MOUSE	CD85k	14728	Lilrb4	1	3	1	1	0	yes
Mouse	P42082	1 - high confidence	T-lymphocyte activation antigen CD86	CD86_MOUSE	CD86	12524	Cd86	1	2	1	1	0	yes
Mouse	P35456	1 - high confidence	Urokinase plasminogen activator surface receptor	UPAR_MOUSE	CD87	18793	Plaur	1	16	1	1	1	yes
Mouse	P01731	1 - high confidence	T-cell surface glycoprotein CD8 alpha chain	CD8A_MOUSE	CD8a	12525	Cd8a	1	3	1	1	0	yes
Mouse	P10300	1 - high confidence	T-cell surface glycoprotein CD8 beta chain	CD8B_MOUSE	CD8b	12526	Cd8b	1	2	1	1	0	yes
Mouse	P01831	1 - high confidence	Thy-1 membrane glycoprotein	THY1_MOUSE	CD90	21838	Thy1	1	23	1	1	1	yes
Mouse	Q91ZX7	1 - high confidence	Prolow-density lipoprotein receptor-related protein 1	LRP1_MOUSE	CD91	16971	Lrp1	1	29	1	1	0	yes
Mouse	Q6X893	1 - high confidence	Choline transporter-like protein 1	CTL1_MOUSE	CD92	100434	Slc44a1	1	3	1	9	0	yes
Mouse	O89103	1 - high confidence	Complement component C1q receptor	C1QR1_MOUSE	CD93	17064	Cd93	0.9944	2	1	1	0	yes
Mouse	P25446	1 - high confidence	Tumor necrosis factor receptor superfamily member 6	TNR6_MOUSE	CD95	14102	Fas	1	5	1	1	0	yes
Mouse	Q3U0X8	1 - high confidence	T-cell surface protein tactile	TACT_MOUSE	CD96	84544	Cd96	0.9946	1	1	1	0	yes
Mouse	Q9Z0M6	1 - high confidence	CD97 antigen	CD97_MOUSE	CD97	26364	Cd97	1	24	1	7	0	yes
Mouse	P10852	1 - high confidence	4F2 cell-surface antigen heavy chain	4F2_MOUSE	CD98	17254	Slc3a2	1	31	1	1	0	yes
Mouse	Q61190	1 - high confidence	Interleukin-10 receptor subunit beta	I10R2_MOUSE	CDw210b	16155	Il10rb	0.9906	1	1	1	0	yes
Mouse	P17182	1 - high confidence	Alpha-enolase	ENOA_MOUSE	no	13806	Eno1	1	11	0	0	0	yes
Mouse	P68040	1 - high confidence	Guanine nucleotide-binding protein subunit beta-2-like 1	GBLP_MOUSE	no	14694	Gnb2l1	1	10	0	0	0	yes
Mouse	P97321	1 - high confidence	Seprase	SEPR_MOUSE	no	14089	Fap	1	1	0	0	0	yes
Mouse	Q60932	1 - high confidence	Voltage-dependent anion-selective channel protein 1	VDAC1_MOUSE	no	22333	Vdac1	1	16	0	0	0	yes
Mouse	Q9Z1Q5	1 - high confidence	Chloride intracellular channel protein 1	CLIC1_MOUSE	no	114584	Clic1	1	3	0	0	0	yes
Mouse	Q8C3Q5	1 - high confidence	Protein shisa-6-like	SHS6L_MOUSE	no	232813	0	0.9973	1	0	0	0	yes
Mouse	Q7TN16	1 - high confidence	Hedgehog-interacting protein	HHIP_MOUSE	no	15245	Hhip	0.996	2	0	0	0	yes
Mouse	P84091	1 - high confidence	AP-2 complex subunit mu	AP2M1_MOUSE	no	11773	Ap2m1	0.9951	6	0	0	0	yes
Mouse	Q8C8R3	1 - high confidence	Ankyrin-2	ANK2_MOUSE	no	109676	Ank2	0.9945	1	0	0	0	yes
Mouse	Q3TNL8	1 - high confidence	Inositol 1,4,5-triphosphate receptor-interacting protein	IPRI_MOUSE	no	414801	Itprip	0.9894	3	0	0	0	yes
Mouse	P01898	1 - high confidence	H-2 class I histocompatibility antigen, Q10 alpha chain	HA10_MOUSE	no	15007	H2-Q10	0.9819	16	0	0	0	yes
Mouse	A6H584	1 - high confidence	Collagen alpha-5(VI) chain	CO6A5_MOUSE	no	665033	Col29a1	1	3	0	0	0	yes
Mouse	O08665	1 - high confidence	Semaphorin-3A	SEM3A_MOUSE	no	20346	Sema3a	1	3	0	0	0	yes
Mouse	O70340	1 - high confidence	Neuronal pentraxin-2	NPTX2_MOUSE	no	53324	Nptx2	1	7	0	0	0	yes
Mouse	P01872	1 - high confidence	Ig mu chain C region secreted form	IGHM_MOUSE	no	16019	Igh-6	1	5	0	0	0	yes
Mouse	P01881	1 - high confidence	Ig delta chain C region secreted form	IGHD_MOUSE	no	0	0	1	2	0	0	0	yes
Mouse	P02468	1 - high confidence	Laminin subunit gamma-1	LAMC1_MOUSE	no	226519	Lamc1	1	23	0	0	0	yes
Mouse	P02469	1 - high confidence	Laminin subunit beta-1	LAMB1_MOUSE	no	16777	Lamb1-1	1	20	0	0	0	yes
Mouse	P07356	1 - high confidence	Annexin A2	ANXA2_MOUSE	no	12306	Anxa2	1	11	0	0	0	yes
Mouse	P11276	1 - high confidence	Fibronectin	FINC_MOUSE	no	14268	Fn1	1	26	0	0	0	yes
Mouse	P19137	1 - high confidence	Laminin subunit alpha-1	LAMA1_MOUSE	no	16772	Lama1	1	16	0	0	0	yes
Mouse	P21956	1 - high confidence	Lactadherin	MFGM_MOUSE	no	17304	Mfge8	1	12	0	0	0	yes
Mouse	P24383	1 - high confidence	Protein Wnt-7a	WNT7A_MOUSE	no	22421	Wnt7a	1	2	0	0	0	yes
Mouse	P28047	1 - high confidence	Protein Wnt-7b	WNT7B_MOUSE	no	22422	Wnt7b	1	2	0	0	0	yes
Mouse	P28798	1 - high confidence	Granulins	GRN_MOUSE	no	14824	Grn	1	5	0	0	0	yes
Mouse	P29699	1 - high confidence	Alpha-2-HS-glycoprotein	FETUA_MOUSE	no	11625	Ahsg	1	13	0	0	0	yes
Mouse	P37889	1 - high confidence	Fibulin-2	FBLN2_MOUSE	no	14115	Fbln2	1	4	0	0	0	yes
Mouse	P39061	1 - high confidence	Collagen alpha-1(XVIII) chain [Cleaved into: Endostatin]	COIA1_MOUSE	no	12822	Col18a1	1	13	0	0	0	yes
Mouse	P55065	1 - high confidence	Phospholipid transfer protein	PLTP_MOUSE	no	18830	Pltp	1	10	0	0	0	yes
Mouse	P55066	1 - high confidence	Neurocan core protein	NCAN_MOUSE	no	13004	Ncan	1	3	0	0	0	yes
Mouse	P58022	1 - high confidence	Lysyl oxidase homolog 2	LOXL2_MOUSE	no	94352	Loxl2	1	4	0	0	0	yes
Mouse	P58242	1 - high confidence	Acid sphingomyelinase-like phosphodiesterase 3b	ASM3B_MOUSE	no	100340	Smpdl3b	1	19	0	0	0	yes
Mouse	P62960	1 - high confidence	Nuclease-sensitive element-binding protein 1	YBOX1_MOUSE	no	22608	Ybx1	1	10	0	0	0	yes
Mouse	P98086	1 - high confidence	Complement C1q subcomponent subunit A	C1QA_MOUSE	no	12259	C1qa	1	4	0	0	0	yes
Mouse	Q00493	1 - high confidence	Carboxypeptidase E	CBPE_MOUSE	no	12876	Cpe	1	8	0	0	0	yes
Mouse	Q02788	1 - high confidence	Collagen alpha-2(VI) chain	CO6A2_MOUSE	no	12834	Col6a2	1	7	0	0	0	yes
Mouse	Q03311	1 - high confidence	Cholinesterase	CHLE_MOUSE	no	12038	Bche	1	1	0	0	0	yes
Mouse	Q04857	1 - high confidence	Collagen alpha-1(VI) chain	CO6A1_MOUSE	no	12833	Col6a1	1	3	0	0	0	yes
Mouse	Q05793	1 - high confidence	Basement membrane-specific heparan sulfate proteoglycan core protein	PGBM_MOUSE	no	15530	Hspg2	1	18	0	0	0	yes
Mouse	Q06890	1 - high confidence	Clusterin	CLUS_MOUSE	no	12759	Clu	1	15	0	0	0	yes
Mouse	Q07797	1 - high confidence	Galectin-3-binding protein	LG3BP_MOUSE	no	19039	Lgals3bp	1	16	0	0	0	yes
Mouse	Q3UQ28	1 - high confidence	Peroxidasin homolog	PXDN_MOUSE	no	69675	Pxdn	1	10	0	0	0	yes
Mouse	Q3V1M1	1 - high confidence	Immunoglobulin superfamily member 10	IGS10_MOUSE	no	242050	Igsf10	1	6	0	0	0	yes
Mouse	Q3V1T4	1 - high confidence	Prolyl 3-hydroxylase 1	P3H1_MOUSE	no	56401	Lepre1	1	6	0	0	0	yes
Mouse	Q60675	1 - high confidence	Laminin subunit alpha-2	LAMA2_MOUSE	no	16773	Lama2	1	1	0	0	0	yes
Mouse	Q60847	1 - high confidence	Collagen alpha-1(XII) chain	COCA1_MOUSE	no	12816	Col12a1	1	6	0	0	0	yes
Mouse	Q61001	1 - high confidence	Laminin subunit alpha-5	LAMA5_MOUSE	no	16776	Lama5	1	18	0	0	0	yes
Mouse	Q61147	1 - high confidence	Ceruloplasmin	CERU_MOUSE	no	12870	Cp	1	16	0	0	0	yes
Mouse	Q61292	1 - high confidence	Laminin subunit beta-2	LAMB2_MOUSE	no	16779	Lamb2	1	5	0	0	0	yes
Mouse	Q61554	1 - high confidence	Fibrillin-1	FBN1_MOUSE	no	14118	Fbn1	1	9	0	0	0	yes
Mouse	Q61555	1 - high confidence	Fibrillin-2	FBN2_MOUSE	no	14119	Fbn2	1	7	0	0	0	yes
Mouse	Q61838	1 - high confidence	Alpha-2-macroglobulin	A2M_MOUSE	no	232345	A2m	1	6	0	0	0	yes
Mouse	Q66PY1	1 - high confidence	Signal peptide, CUB and EGF-like domain-containing protein 3	SCUB3_MOUSE	no	268935	Scube3	1	2	0	0	0	yes
Mouse	Q6DFY8	1 - high confidence	Protein FAM5B	FAM5B_MOUSE	no	240843	Fam5b	1	5	0	0	0	yes
Mouse	Q80T21	1 - high confidence	ADAMTS-like protein 4	ATL4_MOUSE	no	229595	Adamtsl4	1	4	0	0	0	yes
Mouse	Q80YX1	1 - high confidence	Tenascin	TENA_MOUSE	no	21923	Tnc	1	11	0	0	0	yes
Mouse	Q8BHE5	1 - high confidence	Bone morphogenetic protein 3	BMP3_MOUSE	no	110075	Bmp3	1	1	0	0	0	yes
Mouse	Q8BZ64	1 - high confidence	Tectonic-1	TECT1_MOUSE	no	654470	Tctn1	1	3	0	0	0	yes
Mouse	Q8C6K9	1 - high confidence	Collagen alpha-6(VI) chain	CO6A6_MOUSE	no	245026	Col6a6	1	2	0	0	0	yes
Mouse	Q8CG19	1 - high confidence	Latent-transforming growth factor beta-binding protein 1	LTBP1_MOUSE	no	268977	Ltbp1	1	11	0	0	0	yes
Mouse	Q8HW98	1 - high confidence	IgLON family member 5	IGLO5_MOUSE	no	210094	Iglon5	1	17	0	0	0	yes
Mouse	Q8K482	1 - high confidence	EMILIN-2	EMIL2_MOUSE	no	246707	Emilin2	1	2	0	0	0	yes
Mouse	Q91VF5	1 - high confidence	EMI domain-containing protein 1	EMID1_MOUSE	no	140703	Emid1	1	1	0	0	0	yes
Mouse	Q99K41	1 - high confidence	EMILIN-1	EMIL1_MOUSE	no	100952	Emilin1	1	13	0	0	0	yes
Mouse	Q9CQN4	1 - high confidence	Sclerostin domain-containing protein 1	SOSD1_MOUSE	no	66042	Sostdc1	1	1	0	0	0	yes
Mouse	Q9D1H9	1 - high confidence	Microfibril-associated glycoprotein 4	MFAP4_MOUSE	no	76293	Mfap4	1	6	0	0	0	yes
Mouse	Q9D6X6	1 - high confidence	Serine protease 23	PRS23_MOUSE	no	76453	Prss23	1	4	0	0	0	yes
Mouse	Q9DB72	1 - high confidence	BTB/POZ domain-containing protein 17	BTBDH_MOUSE	no	72014	Btbd17	1	8	0	0	0	yes
Mouse	Q9JIF7	1 - high confidence	Coatomer subunit beta	COPB_MOUSE	no	70349	Copb1	1	3	0	0	0	yes
Mouse	Q9JM58	1 - high confidence	Cytokine receptor-like factor 1	CRLF1_MOUSE	no	12931	Crlf1	1	5	0	0	0	yes
Mouse	Q9QZJ6	1 - high confidence	Microfibrillar-associated protein 5	MFAP5_MOUSE	no	50530	Mfap5	1	1	0	0	0	yes
Mouse	Q9R045	1 - high confidence	Angiopoietin-related protein 2	ANGL2_MOUSE	no	26360	Angptl2	1	6	0	0	0	yes
Mouse	Q9R1B9	1 - high confidence	Slit homolog 2 protein	SLIT2_MOUSE	no	20563	Slit2	1	6	0	0	0	yes
Mouse	Q9WVG5	1 - high confidence	Endothelial lipase	LIPE_MOUSE	no	16891	Lipg	1	3	0	0	0	yes
Mouse	Q9Z0L8	1 - high confidence	Gamma-glutamyl hydrolase	GGH_MOUSE	no	14590	Ggh	1	3	0	0	0	yes
Mouse	Q9Z1P8	1 - high confidence	Angiopoietin-related protein 4	ANGL4_MOUSE	no	57875	Angptl4	1	1	0	0	0	yes
Mouse	B2RPV6	1 - high confidence	Multimerin-1	MMRN1_MOUSE	no	70945	Mmrn1	0.9998	2	0	0	0	yes
Mouse	P0C7W3	1 - high confidence	Prosalusin	TOR2X_MOUSE	no	30933	Tor2a	0.9979	6	0	0	0	yes
Mouse	P29788	1 - high confidence	Vitronectin	VTNC_MOUSE	no	22370	Vtn	0.9979	7	0	0	0	yes
Mouse	Q62059	1 - high confidence	Versican core protein	CSPG2_MOUSE	no	13003	Vcan	0.9979	4	0	0	0	yes
Mouse	Q6GQT1	1 - high confidence	Alpha-2-macroglobulin-P	A2MP_MOUSE	no	232345	A2mp	0.9979	1	0	0	0	yes
Mouse	P11087	1 - high confidence	Collagen alpha-1(I) chain	CO1A1_MOUSE	no	12842	Col1a1	0.9975	4	0	0	0	yes
Mouse	O88783	1 - high confidence	Coagulation factor V	FA5_MOUSE	no	14067	F5	0.9974	6	0	0	0	yes
Mouse	Q7TNR6	1 - high confidence	Immunoglobulin superfamily member 21	IGS21_MOUSE	no	230868	Igsf21	0.9974	3	0	0	0	yes
Mouse	Q8BM13	1 - high confidence	Noelin-2	NOE2_MOUSE	no	244723	Olfm2	0.9973	5	0	0	0	yes
Mouse	Q8K4Z0	1 - high confidence	Leucine-rich repeat LGI family member 2	LGI2_MOUSE	no	246316	Lgi2	0.9973	1	0	0	0	yes
Mouse	O08538	1 - high confidence	Angiopoietin-1	ANGP1_MOUSE	no	11600	Angpt1	0.9972	2	0	0	0	yes
Mouse	Q9Z100	1 - high confidence	Probable carboxypeptidase X1	CPXM1_MOUSE	no	56264	Cpxm1	0.9972	2	0	0	0	yes
Mouse	O09118	1 - high confidence	Netrin-1	NET1_MOUSE	no	18208	Ntn1	0.9971	2	0	0	0	yes
Mouse	P04426	1 - high confidence	Proto-oncogene Wnt-1	WNT1_MOUSE	no	22408	Wnt1	0.9971	1	0	0	0	yes
Mouse	Q3UTY6	1 - high confidence	Thrombospondin type-1 domain-containing protein 4	THSD4_MOUSE	no	207596	Thsd4	0.9971	2	0	0	0	yes
Mouse	Q8CI19	1 - high confidence	Platelet-derived growth factor C	PDGFC_MOUSE	no	54635	Pdgfc	0.9971	1	0	0	0	yes
Mouse	Q8K4G1	1 - high confidence	Latent-transforming growth factor beta-binding protein 4	LTBP4_MOUSE	no	108075	Ltbp4	0.9971	1	0	0	0	yes
Mouse	Q9ER58	1 - high confidence	Testican-2	TICN2_MOUSE	no	94214	Spock2	0.9971	2	0	0	0	yes
Mouse	Q9JJS0	1 - high confidence	Signal peptide, CUB and EGF-like domain-containing protein 2	SCUB2_MOUSE	no	56788	Scube2	0.9971	2	0	0	0	yes
Mouse	Q99M71	1 - high confidence	Mammalian ependymin-related protein 1	EPDR1_MOUSE	no	105298	Epdr1	0.9969	2	0	0	0	yes
Mouse	Q07104	1 - high confidence	Growth/differentiation factor 3	GDF3_MOUSE	no	14562	Gdf3	0.9968	2	0	0	0	yes
Mouse	O54819	1 - high confidence	Tissue factor pathway inhibitor	TFPI1_MOUSE	no	21788	Tfpi	0.9966	7	0	0	0	yes
Mouse	O88322	1 - high confidence	Nidogen-2	NID2_MOUSE	no	18074	Nid2	0.9966	14	0	0	0	yes
Mouse	P01868	1 - high confidence	Ig gamma-1 chain C region secreted form	IGHG1_MOUSE	no	16017	Ighg1	0.9966	4	0	0	0	yes
Mouse	P12032	1 - high confidence	Metalloproteinase inhibitor 1	TIMP1_MOUSE	no	21857	Timp1	0.9966	6	0	0	0	yes
Mouse	P28665	1 - high confidence	Murinoglobulin-1	MUG1_MOUSE	no	17836	Mug1	0.9966	1	0	0	0	yes
Mouse	P54751	1 - high confidence	CMP-N-acetylneuraminate-beta-galactosamide-alpha-2,3-sialyltransferase 1	SIA4A_MOUSE	no	20442	St3gal1	0.9966	11	0	0	0	yes
Mouse	Q61207	1 - high confidence	Sulfated glycoprotein 1	SAP_MOUSE	no	19156	Psap	0.9966	20	0	0	0	yes
Mouse	Q62356	1 - high confidence	Follistatin-related protein 1	FSTL1_MOUSE	no	14314	Fstl1	0.9966	5	0	0	0	yes
Mouse	Q99MQ4	1 - high confidence	Asporin	ASPN_MOUSE	no	66695	Aspn	0.9966	2	0	0	0	yes
Mouse	Q9CYD3	1 - high confidence	Cartilage-associated protein	CRTAP_MOUSE	no	56693	Crtap	0.9966	5	0	0	0	yes
Mouse	A2AVA0	1 - high confidence	Sushi, von Willebrand factor type A, EGF and pentraxin domain-containing protein 1	SVEP1_MOUSE	no	64817	Svep1	0.9965	1	0	0	0	yes
Mouse	Q8CIF4	1 - high confidence	Biotinidase	BTD_MOUSE	no	26363	Btd	0.9965	2	0	0	0	yes
Mouse	Q8R2G6	1 - high confidence	Coiled-coil domain-containing protein 80	CCD80_MOUSE	no	67896	Ccdc80	0.9965	1	0	0	0	yes
Mouse	Q920C1	1 - high confidence	Chordin-like protein 1	CRDL1_MOUSE	no	83453	Chrdl1	0.9965	2	0	0	0	yes
Mouse	Q8BTG6	1 - high confidence	UPF0454 protein C12orf49 homolog	CL049_MOUSE	no	76792	0	0.9963	4	0	0	0	yes
Mouse	Q60963	1 - high confidence	Platelet-activating factor acetylhydrolase	PAFA_MOUSE	no	27226	Pla2g7	0.9962	1	0	0	0	yes
Mouse	P04769	1 - high confidence	Prolactin-7D1	PR7D1_MOUSE	no	18814	Prl7d1	0.996	1	0	0	0	yes
Mouse	P28481	1 - high confidence	Collagen alpha-1(II) chain	CO2A1_MOUSE	no	12824	Col2a1	0.996	3	0	0	0	yes
Mouse	P47878	1 - high confidence	Insulin-like growth factor-binding protein 3	IBP3_MOUSE	no	16009	Igfbp3	0.996	1	0	0	0	yes
Mouse	Q62181	1 - high confidence	Semaphorin-3C	SEM3C_MOUSE	no	20348	Sema3c	0.996	2	0	0	0	yes
Mouse	Q64527	1 - high confidence	Protein Wnt-8a	WNT8A_MOUSE	no	20890	Wnt8a	0.996	1	0	0	0	yes
Mouse	Q8VCC9	1 - high confidence	Spondin-1	SPON1_MOUSE	no	233744	Spon1	0.996	2	0	0	0	yes
Mouse	Q920A5	1 - high confidence	Retinoid-inducible serine carboxypeptidase	RISC_MOUSE	no	74617	Scpep1	0.996	2	0	0	0	yes
Mouse	O88207	1 - high confidence	Collagen alpha-1(V) chain	CO5A1_MOUSE	no	12831	Col5a1	0.9959	3	0	0	0	yes
Mouse	Q8BLX7	1 - high confidence	Collagen alpha-1(XVI) chain	COGA1_MOUSE	no	107581	Col16a1	0.9956	1	0	0	0	yes
Mouse	P50427	1 - high confidence	Steryl-sulfatase	STS_MOUSE	no	20905	Sts	0.9955	1	0	0	0	yes
Mouse	Q9DAY5	1 - high confidence	UPF0669 protein C6orf120 homolog	CF120_MOUSE	no	67912	0	0.9955	1	0	0	0	yes
Mouse	P04202	1 - high confidence	Transforming growth factor beta-1	TGFB1_MOUSE	no	21803	Tgfb1	0.9954	3	0	0	0	yes
Mouse	P52430	1 - high confidence	Serum paraoxonase/arylesterase 1	PON1_MOUSE	no	18979	Pon1	0.9954	4	0	0	0	yes
Mouse	Q61508	1 - high confidence	Extracellular matrix protein 1	ECM1_MOUSE	no	13601	Ecm1	0.9954	1	0	0	0	yes
Mouse	P28653	1 - high confidence	Biglycan	PGS1_MOUSE	no	12111	Bgn	0.9953	3	0	0	0	yes
Mouse	Q80TR4	1 - high confidence	Slit homolog 1 protein	SLIT1_MOUSE	no	20562	Slit1	0.9951	5	0	0	0	yes
Mouse	P21844	1 - high confidence	Chymase	CMA1_MOUSE	no	17228	Cma1	0.9948	1	0	0	0	yes
Mouse	P51885	1 - high confidence	Lumican	LUM_MOUSE	no	17022	Lum	0.9945	1	0	0	0	yes
Mouse	Q8BJD1	1 - high confidence	Inter-alpha-trypsin inhibitor heavy chain H5	ITIH5_MOUSE	no	209378	Itih5	0.9945	1	0	0	0	yes
Mouse	P11032	1 - high confidence	Granzyme A	GRAA_MOUSE	no	14938	Gzma	0.9935	1	0	0	0	yes
Mouse	P22725	1 - high confidence	Protein Wnt-5a	WNT5A_MOUSE	no	22418	Wnt5a	0.9931	4	0	0	0	yes
Mouse	Q61361	1 - high confidence	Brevican core protein	PGCB_MOUSE	no	12032	Bcan	0.9931	3	0	0	0	yes
Mouse	P28654	1 - high confidence	Decorin	PGS2_MOUSE	no	13179	Dcn	0.9928	1	0	0	0	yes
Mouse	Q62009	1 - high confidence	Periostin	POSTN_MOUSE	no	50706	Postn	0.9914	1	0	0	0	yes
Mouse	P02772	1 - high confidence	Alpha-fetoprotein	FETA_MOUSE	no	11576	Afp	0.9913	7	0	0	0	yes
Mouse	P63075	1 - high confidence	Fibroblast growth factor 17	FGF17_MOUSE	no	14171	Fgf17	0.99	7	0	0	0	yes
Mouse	P97927	1 - high confidence	Laminin subunit alpha-4	LAMA4_MOUSE	no	16775	Lama4	0.9898	3	0	0	0	yes
Mouse	P10493	1 - high confidence	Nidogen-1	NID1_MOUSE	no	18073	Nid1	0.9889	2	0	0	0	yes
Mouse	Q9QUN9	1 - high confidence	Dickkopf-related protein 3	DKK3_MOUSE	no	50781	Dkk3	0.9881	1	0	0	0	yes
Mouse	P50608	1 - high confidence	Fibromodulin	FMOD_MOUSE	no	14264	Fmod	0.987	1	0	0	0	yes
Mouse	Q9WVB4	1 - high confidence	Slit homolog 3 protein	SLIT3_MOUSE	no	20564	Slit3	0.9817	5	0	0	0	yes
Mouse	P98064	1 - high confidence	Mannan-binding lectin serine protease 1	MASP1_MOUSE	no	17174	Masp1	0.9639	1	0	0	0	yes
Mouse	Q9EQF4	1 - high confidence	Probable folate receptor delta	FOLR4_MOUSE	no	64931	Folr4	0.9538	6	0	0	0	yes
Mouse	Q9JM99	1 - high confidence	Proteoglycan 4	PRG4_MOUSE	no	96875	Prg4	0.94	8	0	0	0	yes
Mouse	P08121	1 - high confidence	Collagen alpha-1(III) chain	CO3A1_MOUSE	no	12825	Col3a1	0.93	2	0	0	0	yes
Mouse	P11214	1 - high confidence	Tissue-type plasminogen activator	TPA_MOUSE	no	18791	Plat	0.9201	2	0	0	0	yes
Mouse	O88998	1 - high confidence	Noelin	NOE1_MOUSE	no	56177	Olfm1	1	2	0	0	0	yes
Mouse	P18242	1 - high confidence	Cathepsin D	CATD_MOUSE	no	13033	Ctsd	1	9	0	0	0	yes
Mouse	P61979	1 - high confidence	Heterogeneous nuclear ribonucleoprotein K	HNRPK_MOUSE	no	15387	Hnrnpk	1	16	0	0	0	yes
Mouse	P98063	1 - high confidence	Bone morphogenetic protein 1	BMP1_MOUSE	no	12153	Bmp1	1	16	0	0	0	yes
Mouse	O35887	1 - high confidence	Calumenin	CALU_MOUSE	no	12321	Calu	0.9966	9	0	0	0	yes
Mouse	P10605	1 - high confidence	Cathepsin B	CATB_MOUSE	no	13030	Ctsb	0.9954	5	0	0	0	yes
Mouse	O08842	1 - high confidence	GDNF family receptor alpha-2	GFRA2_MOUSE	no	14586	Gfra2	1	8	0	0	1	yes
Mouse	O35632	1 - high confidence	Hyaluronidase-2	HYAL2_MOUSE	no	15587	Hyal2	1	4	0	0	1	yes
Mouse	O88507	1 - high confidence	Ciliary neurotrophic factor receptor subunit alpha	CNTFR_MOUSE	no	12804	Cntfr	1	16	0	0	1	yes
Mouse	P09242	1 - high confidence	Alkaline phosphatase, tissue-nonspecific isozyme	PPBT_MOUSE	no	11647	Alpl	1	21	0	0	1	yes
Mouse	P35846	1 - high confidence	Folate receptor alpha	FOLR1_MOUSE	no	14275	Folr1	1	4	0	0	1	yes
Mouse	Q05685	1 - high confidence	Folate receptor beta	FOLR2_MOUSE	no	14276	Folr2	1	5	0	0	1	yes
Mouse	Q0PMG2	1 - high confidence	MAM domain-containing glycosylphosphatidylinositol anchor protein 1	MDGA1_MOUSE	no	74762	Mdga1	1	1	0	0	1	yes
Mouse	Q6PCX7	1 - high confidence	Repulsive guidance molecule A	RGMA_MOUSE	no	244058	Rgma	1	6	0	0	1	yes
Mouse	Q8BLK3	1 - high confidence	Limbic system-associated membrane protein	LSAMP_MOUSE	no	268890	Lsamp	1	7	0	0	1	yes
Mouse	Q8C255	1 - high confidence	Dipeptidase 2	DPEP2_MOUSE	no	319446	Dpep2	1	2	0	0	1	yes
Mouse	Q99PJ0	1 - high confidence	Neurotrimin	NTRI_MOUSE	no	235106	Ntm	1	9	0	0	1	yes
Mouse	Q9JMI7	1 - high confidence	Testis-expressed protein 101	TX101_MOUSE	no	56746	Tex101	1	6	0	0	1	yes
Mouse	Q9WUC3	1 - high confidence	Lymphocyte antigen 6H	LY6H_MOUSE	no	23934	Ly6h	1	8	0	0	1	yes
Mouse	Q9D7S0	1 - high confidence	Uncharacterized protein UNQ511/PRO1026 homolog	YA003_MOUSE	no	70163	0	0.9999	1	0	0	1	yes
Mouse	Q9JMB8	1 - high confidence	Contactin-6	CNTN6_MOUSE	no	53870	Cntn6	0.9973	1	0	0	1	yes
Mouse	P11152	1 - high confidence	Lipoprotein lipase	LIPL_MOUSE	no	16956	Lpl	0.9972	3	0	0	1	yes
Mouse	P57096	1 - high confidence	Prostate stem cell antigen	PSCA_MOUSE	no	72373	Psca	0.9971	1	0	0	1	yes
Mouse	Q64444	1 - high confidence	Carbonic anhydrase 4	CAH4_MOUSE	no	12351	Ca4	0.9968	1	0	0	1	yes
Mouse	P52801	1 - high confidence	Ephrin-A2	EFNA2_MOUSE	no	13637	Efna2	0.9966	5	0	0	1	yes
Mouse	Q61330	1 - high confidence	Contactin-2	CNTN2_MOUSE	no	21367	Cntn2	0.9966	6	0	0	1	yes
Mouse	O35118	1 - high confidence	GDNF family receptor alpha-3	GFRA3_MOUSE	no	14587	Gfra3	0.9938	1	0	0	1	yes
Mouse	P51655	1 - high confidence	Glypican-4	GPC4_MOUSE	no	14735	Gpc4	0.9938	3	0	0	1	yes
Mouse	Q63912	1 - high confidence	Oligodendrocyte-myelin glycoprotein	OMGP_MOUSE	no	18377	Omg	0.9931	3	0	0	1	yes
Mouse	Q8R4F1	1 - high confidence	Netrin-G2	NTNG2_MOUSE	no	171171	Ntng2	0.9922	3	0	0	1	yes
Mouse	P31428	1 - high confidence	Dipeptidase 1	DPEP1_MOUSE	no	13479	Dpep1	0.9819	3	0	0	1	yes
Mouse	A2A8L5	1 - high confidence	Receptor-type tyrosine-protein phosphatase F	PTPRF_MOUSE	no	19268	Ptprf	1	16	1	1	0	yes
Mouse	A2AFS3	1 - high confidence	UPF0577 protein KIAA1324	K1324_MOUSE	no	229722	Kiaa1324	1	2	1	1	0	yes
Mouse	A2AJN7	1 - high confidence	Sodium bicarbonate transporter-like protein 11	S4A11_MOUSE	no	269356	Slc4a11	1	4	1	11	0	yes
Mouse	A2ARI4	1 - high confidence	Leucine-rich repeat-containing G-protein coupled receptor 4	LGR4_MOUSE	no	107515	Lgr4	1	9	1	7	0	yes
Mouse	A2ARV4	1 - high confidence	Low-density lipoprotein receptor-related protein 2	LRP2_MOUSE	no	14725	Lrp2	1	13	1	1	0	yes
Mouse	O08530	1 - high confidence	Sphingosine 1-phosphate receptor 1	S1PR1_MOUSE	no	13609	S1pr1	1	14	1	7	0	yes
Mouse	O08532	1 - high confidence	Voltage-dependent calcium channel subunit alpha-2/delta-1	CA2D1_MOUSE	no	12293	Cacna2d1	1	24	1	1	0	yes
Mouse	O08747	1 - high confidence	Netrin receptor UNC5C	UNC5C_MOUSE	no	22253	Unc5c	1	7	1	1	0	yes
Mouse	O09047	1 - high confidence	C3a anaphylatoxin chemotactic receptor	C3AR_MOUSE	no	12267	C3ar1	1	3	1	7	0	yes
Mouse	O35161	1 - high confidence	Cadherin EGF LAG seven-pass G-type receptor 1	CELR1_MOUSE	no	12614	Celsr1	1	6	1	7	0	yes
Mouse	O35316	1 - high confidence	Sodium- and chloride-dependent taurine transporter	SC6A6_MOUSE	no	21366	Slc6a6	1	21	1	12	0	yes
Mouse	O35393	1 - high confidence	Ephrin-B3	EFNB3_MOUSE	no	13643	Efnb3	1	13	1	1	0	yes
Mouse	O35409	1 - high confidence	Glutamate carboxypeptidase 2	FOLH1_MOUSE	no	53320	Folh1	1	2	1	1	0	yes
Mouse	O35659	1 - high confidence	Glucagon-like peptide 1 receptor	GLP1R_MOUSE	no	14652	Glp1r	1	1	1	7	0	yes
Mouse	O35714	1 - high confidence	Tumor necrosis factor receptor superfamily member 18	TNR18_MOUSE	no	21936	Tnfrsf18	1	3	1	1	0	yes
Mouse	O54732	1 - high confidence	Matrix metalloproteinase-15	MMP15_MOUSE	no	17388	Mmp15	1	13	1	1	0	yes
Mouse	O54991	1 - high confidence	Contactin-associated protein 1	CNTP1_MOUSE	no	53321	Cntnap1	1	5	1	1	0	yes
Mouse	O70174	1 - high confidence	Neuronal acetylcholine receptor subunit alpha-4	ACHA4_MOUSE	no	11438	Chrna4	1	3	1	4	0	yes
Mouse	O70255	1 - high confidence	Myelin protein zero-like protein 2	MPZL2_MOUSE	no	14012	Mpzl2	1	6	1	1	0	yes
Mouse	O70309	1 - high confidence	Integrin beta-5	ITB5_MOUSE	no	16419	Itgb5	1	12	1	1	0	yes
Mouse	O70458	1 - high confidence	Oncostatin-M-specific receptor subunit beta	OSMR_MOUSE	no	18414	Osmr	1	10	1	1	0	yes
Mouse	O88307	1 - high confidence	Sortilin-related receptor	SORL_MOUSE	no	20660	Sorl1	1	10	1	1	0	yes
Mouse	O88393	1 - high confidence	Transforming growth factor beta receptor type 3	TGBR3_MOUSE	no	21814	Tgfbr3	1	6	1	1	0	yes
Mouse	O89001	1 - high confidence	Carboxypeptidase D	CBPD_MOUSE	no	12874	Cpd	1	21	1	1	0	yes
Mouse	P01899	1 - high confidence	H-2 class I histocompatibility antigen, D-B alpha chain	HA11_MOUSE	no	14964	H2-D1	1	10	1	1	0	yes
Mouse	P01902	1 - high confidence	H-2 class I histocompatibility antigen, K-D alpha chain	HA1D_MOUSE	no	14972	H2-K1	1	2	1	1	0	yes
Mouse	P01904	1 - high confidence	H-2 class II histocompatibility antigen, E-D alpha chain	HA21_MOUSE	no	14968	H2-Ea	1	1	1	1	0	yes
Mouse	P01910	1 - high confidence	H-2 class II histocompatibility antigen, A-K alpha chain	HA2K_MOUSE	no	14960	H2-Aa	1	2	1	1	0	yes
Mouse	P03991	1 - high confidence	H-2 class I histocompatibility antigen, K-W28 alpha chain	HA1W_MOUSE	no	14972	H2-K1	1	7	1	1	0	yes
Mouse	P04223	1 - high confidence	H-2 class I histocompatibility antigen, K-K alpha chain	HA1K_MOUSE	no	14972	H2-K1	1	1	1	1	0	yes
Mouse	P07141	1 - high confidence	Macrophage colony-stimulating factor 1	CSF1_MOUSE	no	12977	Csf1	1	13	1	1	0	yes
Mouse	P0C192	1 - high confidence	Leucine-rich repeat-containing protein 4B	LRC4B_MOUSE	no	272381	Lrrc4b	1	7	1	1	0	yes
Mouse	P10287	1 - high confidence	Cadherin-3	CADH3_MOUSE	no	12560	Cdh3	1	2	1	1	0	yes
Mouse	P10404	1 - high confidence	MLV-related proviral Env polyprotein [Cleaved into: Surface protein	ENV1_MOUSE	no		0	1	19	1	2	0	yes
Mouse	P14094	1 - high confidence	Sodium/potassium-transporting ATPase subunit beta-1	AT1B1_MOUSE	no	11931	Atp1b1	1	27	1	1	0	yes
Mouse	P14231	1 - high confidence	Sodium/potassium-transporting ATPase subunit beta-2	AT1B2_MOUSE	no	11932	Atp1b2	1	21	1	1	0	yes
Mouse	P14426	1 - high confidence	H-2 class I histocompatibility antigen, D-K alpha chain	HA13_MOUSE	no	14964	H2-D1	1	3	1	1	0	yes
Mouse	P14429	1 - high confidence	H-2 class I histocompatibility antigen, Q7 alpha chain	HA17_MOUSE	no	15018	H2-Q7	1	7	1	1	0	yes
Mouse	P15209	1 - high confidence	BDNF/NT-3 growth factors receptor	NTRK2_MOUSE	no	18212	Ntrk2	1	13	1	1	0	yes
Mouse	P15920	1 - high confidence	V-type proton ATPase 116 kDa subunit a isoform 2	VPP2_MOUSE	no	21871	Atp6v0a2	1	11	1	7	0	yes
Mouse	P16056	1 - high confidence	Hepatocyte growth factor receptor	MET_MOUSE	no	17295	Met	1	2	1	1	0	yes
Mouse	P16305	1 - high confidence	Gamma-aminobutyric acid receptor subunit alpha-6	GBRA6_MOUSE	no	14399	Gabra6	1	1	1	4	0	yes
Mouse	P17809	1 - high confidence	Solute carrier family 2, facilitated glucose transporter member 1	GTR1_MOUSE	no	20525	Slc2a1	1	30	1	12	0	yes
Mouse	P21995	1 - high confidence	Embigin	EMB_MOUSE	no	13723	Emb	1	29	1	1	0	yes
Mouse	P23818	1 - high confidence	Glutamate receptor 1	GRIA1_MOUSE	no	14799	Gria1	1	1	1	3	0	yes
Mouse	P26049	1 - high confidence	Gamma-aminobutyric acid receptor subunit alpha-3	GBRA3_MOUSE	no	14396	Gabra3	1	1	1	4	0	yes
Mouse	P27038	1 - high confidence	Activin receptor type-2A	AVR2A_MOUSE	no	11480	Acvr2a	1	13	1	1	0	yes
Mouse	P27573	1 - high confidence	Myelin protein P0	MYP0_MOUSE	no	17528	Mpz	1	2	1	1	0	yes
Mouse	P28828	1 - high confidence	Receptor-type tyrosine-protein phosphatase mu	PTPRM_MOUSE	no	19274	Ptprm	1	14	1	1	0	yes
Mouse	P30558	1 - high confidence	Proteinase-activated receptor 1	PAR1_MOUSE	no	14062	F2r	1	9	1	7	0	yes
Mouse	P32299	1 - high confidence	B2 bradykinin receptor	BKRB2_MOUSE	no	12062	Bdkrb2	1	2	1	7	0	yes
Mouse	P33146	1 - high confidence	Cadherin-15	CAD15_MOUSE	no	12555	Cdh15	1	1	1	1	0	yes
Mouse	P35347	1 - high confidence	Corticotropin-releasing factor receptor 1	CRFR1_MOUSE	no	12921	Crhr1	1	2	1	7	0	yes
Mouse	P35374	1 - high confidence	Type-2 angiotensin II receptor	AGTR2_MOUSE	no	11609	Agtr2	1	1	1	7	0	yes
Mouse	P35438	1 - high confidence	Glutamate [NMDA] receptor subunit zeta-1	NMDZ1_MOUSE	no	14810	Grin1	1	2	1	3	0	yes
Mouse	P35803	1 - high confidence	Neuronal membrane glycoprotein M6-b	GPM6B_MOUSE	no	14758	Gpm6b	1	13	1	4	0	yes
Mouse	P35822	1 - high confidence	Receptor-type tyrosine-protein phosphatase kappa	PTPRK_MOUSE	no	19272	Ptprk	1	10	1	1	0	yes
Mouse	P35969	1 - high confidence	Vascular endothelial growth factor receptor 1	VGFR1_MOUSE	no	14254	Flt1	1	6	1	1	0	yes
Mouse	P41593	1 - high confidence	Parathyroid hormone/parathyroid hormone-related peptide receptor	PTH1R_MOUSE	no	19228	Pth1r	1	3	1	7	0	yes
Mouse	P47746	1 - high confidence	Cannabinoid receptor 1	CNR1_MOUSE	no	12801	Cnr1	1	1	1	7	0	yes
Mouse	P52592	1 - high confidence	Sphingosine 1-phosphate receptor 2	S1PR2_MOUSE	no	14739	S1pr2	1	28	1	7	0	yes
Mouse	P54761	1 - high confidence	Ephrin type-B receptor 4	EPHB4_MOUSE	no	13846	Ephb4	1	22	1	1	0	yes
Mouse	P54763	1 - high confidence	Ephrin type-B receptor 2	EPHB2_MOUSE	no	13844	Ephb2	1	24	1	1	0	yes
Mouse	P55292	1 - high confidence	Desmocollin-2	DSC2_MOUSE	no	13506	Dsc2	1	5	1	1	0	yes
Mouse	P57716	1 - high confidence	Nicastrin	NICA_MOUSE	no	59287	Ncstn	1	24	1	1	0	yes
Mouse	P70205	1 - high confidence	Pituitary adenylate cyclase-activating polypeptide type I receptor	PACR_MOUSE	no	11517	Adcyap1r1	1	2	1	7	0	yes
Mouse	P70206	1 - high confidence	Plexin-A1	PLXA1_MOUSE	no	18844	Plxna1	1	29	1	1	0	yes
Mouse	P70207	1 - high confidence	Plexin-A2	PLXA2_MOUSE	no	18845	Plxna2	1	4	1	1	0	yes
Mouse	P70232	1 - high confidence	Neural cell adhesion molecule L1-like protein	CHL1_MOUSE	no	12661	Chl1	1	10	1	1	0	yes
Mouse	P70302	1 - high confidence	Stromal interaction molecule 1	STIM1_MOUSE	no	20866	Stim1	1	14	1	1	0	yes
Mouse	P70408	1 - high confidence	Cadherin-10	CAD10_MOUSE	no	320873	Cdh10	1	3	1	1	0	yes
Mouse	P70414	1 - high confidence	Sodium/calcium exchanger 1	NAC1_MOUSE	no	20541	Slc8a1	1	10	1	10	0	yes
Mouse	P80560	1 - high confidence	Receptor-type tyrosine-protein phosphatase N2	PTPR2_MOUSE	no	19276	Ptprn2	1	1	1	1	0	yes
Mouse	P83626	1 - high confidence	Tumor necrosis factor receptor superfamily member 26	TNR26_MOUSE	no	244237	Tnfrsf26	1	4	1	1	0	yes
Mouse	P86044	1 - high confidence	Anoctamin-9	ANO9_MOUSE	no	71345	Ano9	1	6	1	8	0	yes
Mouse	P97300	1 - high confidence	Neuroplastin	NPTN_MOUSE	no	20320	Nptn	1	31	1	1	0	yes
Mouse	P97378	1 - high confidence	Interleukin-12 receptor subunit beta-2	I12R2_MOUSE	no	16162	Il12rb2	1	2	1	1	0	yes
Mouse	P97792	1 - high confidence	Coxsackievirus and adenovirus receptor homolog	CXAR_MOUSE	no	13052	Cxadr	1	10	1	1	0	yes
Mouse	P97798	1 - high confidence	Neogenin	NEO1_MOUSE	no	18007	Neo1	1	23	1	1	0	yes
Mouse	Q00993	1 - high confidence	Tyrosine-protein kinase receptor UFO	UFO_MOUSE	no	26362	Axl	1	9	1	1	0	yes
Mouse	Q01097	1 - high confidence	Glutamate [NMDA] receptor subunit epsilon-2	NMDE2_MOUSE	no	14812	Grin2b	1	1	1	4	0	yes
Mouse	Q01279	1 - high confidence	Epidermal growth factor receptor	EGFR_MOUSE	no	13649	Egfr	1	16	1	1	0	yes
Mouse	Q01338	1 - high confidence	Alpha-2A adrenergic receptor	ADA2A_MOUSE	no	11551	Adra2a	1	1	1	7	0	yes
Mouse	Q01705	1 - high confidence	Neurogenic locus notch homolog protein 1	NOTC1_MOUSE	no	18128	Notch1	1	7	1	1	0	yes
Mouse	Q01815	1 - high confidence	Voltage-dependent L-type calcium channel subunit alpha-1C	CAC1C_MOUSE	no	12288	Cacna1c	1	2	1	20	0	yes
Mouse	Q03145	1 - high confidence	Ephrin type-A receptor 2	EPHA2_MOUSE	no	13836	Epha2	1	22	1	1	0	yes
Mouse	Q05909	1 - high confidence	Receptor-type tyrosine-protein phosphatase gamma	PTPRG_MOUSE	no	19270	Ptprg	1	17	1	2	0	yes
Mouse	Q05BQ1	1 - high confidence	Protein turtle homolog A	TUTLA_MOUSE	no	93842	Igsf9	1	1	1	1	0	yes
Mouse	Q2EY15	1 - high confidence	Protogenin	PRTG_MOUSE	no	235472	Prtg	1	9	1	1	0	yes
Mouse	Q2MV57	1 - high confidence	Tectonic-2	TECT2_MOUSE	no	67978	Tctn2	1	6	1	1	0	yes
Mouse	Q2PZL6	1 - high confidence	Protocadherin Fat 4	FAT4_MOUSE	no	329628	Fat4	1	7	1	1	0	yes
Mouse	Q2YFS1	1 - high confidence	Paired immunoglobulin-like type 2 receptor beta-2	PILB2_MOUSE	no	545812	Pilrb2	1	5	1	1	0	yes
Mouse	Q32M26	1 - high confidence	Uncharacterized protein C11orf87 homolog	CK087_MOUSE	no	330941	0	1	2	1	1	0	yes
Mouse	Q3TEW6	1 - high confidence	Myelin protein zero-like protein 1	MPZL1_MOUSE	no	68481	Mpzl1	1	23	1	1	0	yes
Mouse	Q3TH73	1 - high confidence	Protein tweety homolog 2	TTYH2_MOUSE	no	117160	Ttyh2	1	7	1	5	0	yes
Mouse	Q3TMX7	1 - high confidence	Sulfhydryl oxidase 2	QSOX2_MOUSE	no	227638	Qsox2	1	7	1	1	0	yes
Mouse	Q3U1J0	1 - high confidence	Sodium-coupled neutral amino acid transporter 5	S38A5_MOUSE	no	209837	Slc38a5	1	1	1	11	0	yes
Mouse	Q3UH53	1 - high confidence	Protein sidekick-1	SDK1_MOUSE	no	330222	Sdk1	1	3	1	1	0	yes
Mouse	Q3UVX5	1 - high confidence	Metabotropic glutamate receptor 5	GRM5_MOUSE	no	108071	Grm5	1	3	1	7	0	yes
Mouse	Q3UZV7	1 - high confidence	UPF0577 protein KIAA1324-like homolog	K132L_MOUSE	no	231014	0	1	4	1	1	0	yes
Mouse	Q4PZA2	1 - high confidence	Endothelin-converting enzyme 1	ECE1_MOUSE	no	230857	Ece1	1	26	1	1	0	yes
Mouse	Q4V9Z5	1 - high confidence	Seizure 6-like protein 2	SE6L2_MOUSE	no	233878	Sez6l2	1	3	1	1	0	yes
Mouse	Q4VAH7	1 - high confidence	HEPACAM family member 2	HECA2_MOUSE	no	101202	Hepacam2	1	1	1	1	0	yes
Mouse	Q56A07	1 - high confidence	Sodium channel subunit beta-2	SCN2B_MOUSE	no	72821	Scn2b	1	6	1	1	0	yes
Mouse	Q5DTL9	1 - high confidence	Sodium-driven chloride bicarbonate exchanger	S4A10_MOUSE	no	94229	Slc4a10	1	3	1	11	0	yes
Mouse	Q60673	1 - high confidence	Receptor-type tyrosine-protein phosphatase-like N	PTPRN_MOUSE	no	19275	Ptprn	1	1	1	1	0	yes
Mouse	Q60738	1 - high confidence	Zinc transporter 1	ZNT1_MOUSE	no	22782	Slc30a1	1	25	1	6	0	yes
Mouse	Q60755	1 - high confidence	Calcitonin receptor	CALCR_MOUSE	no	12311	Calcr	1	9	1	7	0	yes
Mouse	Q61009	1 - high confidence	Scavenger receptor class B member 1	SCRB1_MOUSE	no	20778	Scarb1	1	17	1	2	0	yes
Mouse	Q61137	1 - high confidence	Astrotactin-1	ASTN1_MOUSE	no	11899	Astn1	1	7	1	2	0	yes
Mouse	Q61450	1 - high confidence	Mast cell surface glycoprotein Gp49A	GP49A_MOUSE	no	14727	Gp49a	1	2	1	1	0	yes
Mouse	Q61469	1 - high confidence	Lipid phosphate phosphohydrolase 1	LPP1_MOUSE	no	19012	Ppap2a	1	13	1	5	0	yes
Mouse	Q61527	1 - high confidence	Receptor tyrosine-protein kinase erbB-4	ERBB4_MOUSE	no	13869	Erbb4	1	3	1	1	0	yes
Mouse	Q61543	1 - high confidence	Golgi apparatus protein 1	GSLG1_MOUSE	no	20340	Glg1	1	23	1	1	0	yes
Mouse	Q61549	1 - high confidence	EGF-like module-containing mucin-like hormone receptor-like 1	EMR1_MOUSE	no	13733	Emr1	1	4	1	7	0	yes
Mouse	Q61738	1 - high confidence	Integrin alpha-7 [Cleaved into: Integrin alpha-7 heavy chain; Integrin alpha-7 light chain]	ITA7_MOUSE	no	16404	Itga7	1	6	1	1	0	yes
Mouse	Q61809	1 - high confidence	Leucine-rich repeat neuronal protein 1	LRRN1_MOUSE	no	16979	Lrrn1	1	7	1	1	0	yes
Mouse	Q62179	1 - high confidence	Semaphorin-4B	SEM4B_MOUSE	no	20352	Sema4b	1	18	1	1	0	yes
Mouse	Q62313	1 - high confidence	Trans-Golgi network integral membrane protein 1	TGON1_MOUSE	no	22134	Tgoln1	1	23	1	1	0	yes
Mouse	Q64735	1 - high confidence	Complement regulatory protein Crry	CRRY_MOUSE	no	12946	Crry	1	27	1	1	0	yes
Mouse	Q68ED2	1 - high confidence	Metabotropic glutamate receptor 7	GRM7_MOUSE	no	108073	Grm7	1	1	1	7	0	yes
Mouse	Q68FM6	1 - high confidence	Leucine-rich repeat and fibronectin type-III domain-containing protein 6	LRFN6_MOUSE	no	207393	Elfn2	1	3	1	1	0	yes
Mouse	Q69ZU6	1 - high confidence	Thrombospondin type-1 domain-containing protein 7A	THS7A_MOUSE	no	330267	Thsd7a	1	4	1	1	0	yes
Mouse	Q6DIB5	1 - high confidence	Multiple epidermal growth factor-like domains protein 10	MEG10_MOUSE	no	70417	Megf10	1	3	1	1	0	yes
Mouse	Q6F3F9	1 - high confidence	G-protein coupled receptor 126	GP126_MOUSE	no	215798	Gpr126	1	5	1	7	0	yes
Mouse	Q6GQU6	1 - high confidence	Leucine-rich repeat and immunoglobulin-like domain-containing nogo receptor-interacting protein 3	LIGO3_MOUSE	no	237403	Lingo3	1	1	1	1	0	yes
Mouse	Q6IEE6	1 - high confidence	Transmembrane protein 132E	T132E_MOUSE	no	270893	Tmem132e	1	4	1	1	0	yes
Mouse	Q6NVD0	1 - high confidence	FRAS1-related extracellular matrix protein 2	FREM2_MOUSE	no	242022	Frem2	1	11	1	1	0	yes
Mouse	Q6P1D5	1 - high confidence	Seizure 6-like protein	SE6L1_MOUSE	no	56747	Sez6l	1	4	1	1	0	yes
Mouse	Q6P5F6	1 - high confidence	Zinc transporter ZIP10	S39AA_MOUSE	no	227059	Slc39a10	1	25	1	6	0	yes
Mouse	Q6P6J9	1 - high confidence	Thioredoxin domain-containing protein 15	TXD15_MOUSE	no	69672	Txndc15	1	17	1	1	0	yes
Mouse	Q6P9J9	1 - high confidence	Anoctamin-6	ANO6_MOUSE	no	105722	Ano6	1	29	1	8	0	yes
Mouse	Q6PGD0	1 - high confidence	Apoptosis-related protein 3	APR3_MOUSE	no	381629	4/3/2010	1	8	1	1	0	yes
Mouse	Q6PHU5	1 - high confidence	Sortilin	SORT_MOUSE	no	20661	Sort1	1	15	1	1	0	yes
Mouse	Q6PIC6	1 - high confidence	Sodium/potassium-transporting ATPase subunit alpha-3	AT1A3_MOUSE	no	232975	Atp1a3	1	4	1	8	0	yes
Mouse	Q6R5N8	1 - high confidence	Toll-like receptor 13	TLR13_MOUSE	no	279572	Tlr13	1	3	1	1	0	yes
Mouse	Q6V4S5	1 - high confidence	Protein sidekick-2	SDK2_MOUSE	no	237979	Sdk2	1	6	1	1	0	yes
Mouse	Q6VNS1	1 - high confidence	NT-3 growth factor receptor	NTRK3_MOUSE	no	18213	Ntrk3	1	6	1	1	0	yes
Mouse	Q6ZQA6	1 - high confidence	Immunoglobulin superfamily member 3	IGSF3_MOUSE	no	78908	Igsf3	1	18	1	1	0	yes
Mouse	Q71M36	1 - high confidence	Chondroitin sulfate proteoglycan 5	CSPG5_MOUSE	no	29873	Cspg5	1	10	1	1	0	yes
Mouse	Q75N73	1 - high confidence	Zinc transporter ZIP14	S39AE_MOUSE	no	213053	Slc39a14	1	30	1	6	0	yes
Mouse	Q7TN73	1 - high confidence	CAS1 domain-containing protein 1	CASD1_MOUSE	no	213819	Casd1	1	12	1	14	0	yes
Mouse	Q80T14	1 - high confidence	Extracellular matrix protein FRAS1	FRAS1_MOUSE	no	231470	Fras1	1	2	1	1	0	yes
Mouse	Q80T41	1 - high confidence	Gamma-aminobutyric acid type B receptor subunit 2	GABR2_MOUSE	no	242425	Gabbr2	1	3	1	7	0	yes
Mouse	Q80TR1	1 - high confidence	Latrophilin-1	LPHN1_MOUSE	no	330814	Lphn1	1	2	1	7	0	yes
Mouse	Q80TS3	1 - high confidence	Latrophilin-3	LPHN3_MOUSE	no	319387	Lphn3	1	5	1	7	0	yes
Mouse	Q80UG2	1 - high confidence	Plexin-A4	PLXA4_MOUSE	no	243743	Plxna4	1	1	1	1	0	yes
Mouse	Q80UL9	1 - high confidence	Junctional adhesion molecule-like	JAML1_MOUSE	no	270152	Amica1	1	3	1	1	0	yes
Mouse	Q80WT4	1 - high confidence	Probable G-protein coupled receptor 176	GP176_MOUSE	no	381413	Gpr176	1	4	1	7	0	yes
Mouse	Q80YA8	1 - high confidence	Crumbs homolog 2	CRUM2_MOUSE	no	241324	Crb2	1	6	1	1	0	yes
Mouse	Q80ZF8	1 - high confidence	Brain-specific angiogenesis inhibitor 3	BAI3_MOUSE	no	210933	Bai3	1	4	1	8	0	yes
Mouse	Q810C0	1 - high confidence	SLIT and NTRK-like protein 2	SLIK2_MOUSE	no	245450	Slitrk2	1	5	1	1	0	yes
Mouse	Q810U3	1 - high confidence	Neurofascin	NFASC_MOUSE	no	269116	Nfasc	1	7	1	1	0	yes
Mouse	Q810U4	1 - high confidence	Neuronal cell adhesion molecule	NRCAM_MOUSE	no	319504	Nrcam	1	17	1	1	0	yes
Mouse	Q8BH27	1 - high confidence	Multiple epidermal growth factor-like domains protein 9	MEGF9_MOUSE	no	230316	Megf9	1	2	1	1	0	yes
Mouse	Q8BHA1	1 - high confidence	Leucine-rich repeat-containing protein 24	LRC24_MOUSE	no	378937	Lrrc24	1	2	1	1	0	yes
Mouse	Q8BJ83	1 - high confidence	TM2 domain-containing protein 3	TM2D3_MOUSE	no	68634	Tm2d3	1	15	1	1	0	yes
Mouse	Q8BKG3	1 - high confidence	Tyrosine-protein kinase-like 7	PTK7_MOUSE	no	71461	Ptk7	1	25	1	1	0	yes
Mouse	Q8BLI4	1 - high confidence	Dermatan-sulfate epimerase	DSE_MOUSE	no	212898	Dse	1	4	1	2	0	yes
Mouse	Q8BLQ9	1 - high confidence	Cell adhesion molecule 2	CADM2_MOUSE	no	239857	Cadm2	1	13	1	1	0	yes
Mouse	Q8BMC0	1 - high confidence	Lysophosphatidic acid receptor 6	LPAR6_MOUSE	no	67168	Lpar6	1	11	1	7	0	yes
Mouse	Q8BQC3	1 - high confidence	Immunoglobulin superfamily DCC subclass member 3	IGDC3_MOUSE	no	19289	Igdcc3	1	4	1	1	0	yes
Mouse	Q8BR76	1 - high confidence	Meckelin	MKS3_MOUSE	no	329795	Tmem67	1	4	1	5	0	yes
Mouse	Q8BTJ4	1 - high confidence	Ectonucleotide pyrophosphatase/phosphodiesterase family member 4	ENPP4_MOUSE	no	224794	Enpp4	1	13	1	1	0	yes
Mouse	Q8BTY2	1 - high confidence	Sodium bicarbonate cotransporter 3	S4A7_MOUSE	no	218756	Slc4a7	1	27	1	9	0	yes
Mouse	Q8BXN9	1 - high confidence	Transmembrane protein 87A	TM87A_MOUSE	no	211499	Tmem87a	1	30	1	7	0	yes
Mouse	Q8C129	1 - high confidence	Leucyl-cystinyl aminopeptidase	LCAP_MOUSE	no	240028	Lnpep	1	31	1	1	0	yes
Mouse	Q8C145	1 - high confidence	Zinc transporter ZIP6	S39A6_MOUSE	no	106957	Slc39a6	1	29	1	6	0	yes
Mouse	Q8C341	1 - high confidence	Protein C1orf9 homolog	CA009_MOUSE	no	0	0	1	4	1	1	0	yes
Mouse	Q8C419	1 - high confidence	Probable G-protein coupled receptor 158	GP158_MOUSE	no	241263	Gpr158	1	1	1	7	0	yes
Mouse	Q8CBF3	1 - high confidence	Ephrin type-B receptor 1	EPHB1_MOUSE	no	270190	Ephb1	1	2	1	1	0	yes
Mouse	Q8CEF9	1 - high confidence	Transmembrane protein 132C	T132C_MOUSE	no	208213	Tmem132c	1	2	1	1	0	yes
Mouse	Q8CFE6	1 - high confidence	Sodium-coupled neutral amino acid transporter 2	S38A2_MOUSE	no	67760	Slc38a2	1	18	1	11	0	yes
Mouse	Q8CGQ8	1 - high confidence	Sodium/potassium/calcium exchanger 4	NCKX4_MOUSE	no	238384	Slc24a4	1	2	1	10	0	yes
Mouse	Q8CJH3	1 - high confidence	Plexin-B1	PLXB1_MOUSE	no	235611	Plxnb1	1	21	1	1	0	yes
Mouse	Q8JZM4	1 - high confidence	Delta and Notch-like epidermal growth factor-related receptor	DNER_MOUSE	no	227325	Dner	1	3	1	1	0	yes
Mouse	Q8JZZ7	1 - high confidence	Latrophilin-2	LPHN2_MOUSE	no	99633	Lphn2	1	16	1	7	0	yes
Mouse	Q8K1S3	1 - high confidence	Netrin receptor UNC5B	UNC5B_MOUSE	no	107449	Unc5b	1	6	1	1	0	yes
Mouse	Q8K209	1 - high confidence	G-protein coupled receptor 56	GPR56_MOUSE	no	14766	Gpr56	1	16	1	7	0	yes
Mouse	Q8K2P7	1 - high confidence	Sodium-coupled neutral amino acid transporter 1	S38A1_MOUSE	no	105727	Slc38a1	1	8	1	11	0	yes
Mouse	Q8R0I0	1 - high confidence	Angiotensin-converting enzyme 2	ACE2_MOUSE	no	70008	Ace2	1	1	1	1	0	yes
Mouse	Q8R373	1 - high confidence	Adipocyte adhesion molecule	ACAM_MOUSE	no	71566	Acam	1	9	1	1	0	yes
Mouse	Q8R3L5	1 - high confidence	Solute carrier organic anion transporter family member 3A1	SO3A1_MOUSE	no	108116	Slco3a1	1	14	1	12	0	yes
Mouse	Q8R464	1 - high confidence	Cell adhesion molecule 4	CADM4_MOUSE	no	260299	Cadm4	1	19	1	1	0	yes
Mouse	Q8R4Y4	1 - high confidence	Stabilin-1	STAB1_MOUSE	no	192187	Stab1	1	2	1	3	0	yes
Mouse	Q8R5M8	1 - high confidence	Cell adhesion molecule 1	CADM1_MOUSE	no	54725	Cadm1	1	28	1	1	0	yes
Mouse	Q8VDN2	1 - high confidence	Sodium/potassium-transporting ATPase subunit alpha-1	AT1A1_MOUSE	no	11928	Atp1a1	1	4	1	8	0	yes
Mouse	Q8VHN7	1 - high confidence	G-protein coupled receptor 98	GPR98_MOUSE	no	110789	Gpr98	1	2	1	7	0	yes
Mouse	Q8VHW2	1 - high confidence	Voltage-dependent calcium channel gamma-8 subunit	CCG8_MOUSE	no	81905	Cacng8	1	6	1	4	0	yes
Mouse	Q8VHY0	1 - high confidence	Chondroitin sulfate proteoglycan 4	CSPG4_MOUSE	no	121021	Cspg4	1	14	1	1	0	yes
Mouse	Q91V08	1 - high confidence	C-type lectin domain family 2 member D	CLC2D_MOUSE	no	93694	Clec2d	1	11	1	1	0	yes
Mouse	Q91V14	1 - high confidence	Solute carrier family 12 member 5	S12A5_MOUSE	no	57138	Slc12a5	1	14	1	11	0	yes
Mouse	Q91V24	1 - high confidence	ATP-binding cassette sub-family A member 7	ABCA7_MOUSE	no	27403	Abca7	1	9	1	13	0	yes
Mouse	Q91V87	1 - high confidence	Fibroblast growth factor receptor-like 1	FGRL1_MOUSE	no	116701	Fgfrl1	1	7	1	1	0	yes
Mouse	Q91YY5	1 - high confidence	Solute carrier organic anion transporter family member 1A5	SO1A5_MOUSE	no	108096	Slco1a5	1	1	1	12	0	yes
Mouse	Q91ZI0	1 - high confidence	Cadherin EGF LAG seven-pass G-type receptor 3	CELR3_MOUSE	no	107934	Celsr3	1	2	1	7	0	yes
Mouse	Q91ZV7	1 - high confidence	Plexin domain-containing protein 1	PXDC1_MOUSE	no	72324	Plxdc1	1	2	1	1	0	yes
Mouse	Q91ZV8	1 - high confidence	Probable G-protein coupled receptor 124	GP124_MOUSE	no	78560	Gpr124	1	3	1	7	0	yes
Mouse	Q923B6	1 - high confidence	Metalloreductase STEAP4	STEA4_MOUSE	no	117167	Steap4	1	4	1	6	0	yes
Mouse	Q923L3	1 - high confidence	CUB and sushi domain-containing protein 1	CSMD1_MOUSE	no	94109	Csmd1	1	4	1	1	0	yes
Mouse	Q924N4	1 - high confidence	Solute carrier family 12 member 6	S12A6_MOUSE	no	107723	Slc12a6	1	25	1	14	0	yes
Mouse	Q99J21	1 - high confidence	Mucolipin-1	MCLN1_MOUSE	no	94178	Mcoln1	1	19	1	6	0	yes
Mouse	Q99K10	1 - high confidence	Neuroligin-1	NLGN1_MOUSE	no	192167	Nlgn1	1	5	1	1	0	yes
Mouse	Q99MB3	1 - high confidence	TM2 domain-containing protein 1	TM2D1_MOUSE	no	94043	Tm2d1	1	19	1	2	0	yes
Mouse	Q99MR3	1 - high confidence	Solute carrier family 12 member 9	S12A9_MOUSE	no	83704	Slc12a9	1	21	1	13	0	yes
Mouse	Q99N28	1 - high confidence	Cell adhesion molecule 3	CADM3_MOUSE	no	94332	Cadm3	1	4	1	1	0	yes
Mouse	Q99P47	1 - high confidence	Contactin-associated protein-like 4	CNTP4_MOUSE	no	170571	Cntnap4	1	1	1	1	0	yes
Mouse	Q99PD7	1 - high confidence	Sodium/potassium/calcium exchanger 3	NCKX3_MOUSE	no	94249	Slc24a3	1	5	1	11	0	yes
Mouse	Q99PH1	1 - high confidence	Leucine-rich repeat-containing protein 4	LRRC4_MOUSE	no	192198	Lrrc4	1	5	1	2	0	yes
Mouse	Q9CS84	1 - high confidence	Neurexin-1-alpha	NRX1A_MOUSE	no	18189	Nrxn1	1	5	1	1	0	yes
Mouse	Q9CZ52	1 - high confidence	Anthrax toxin receptor 1	ANTR1_MOUSE	no	69538	Antxr1	1	17	1	1	0	yes
Mouse	Q9CZT5	1 - high confidence	Vasorin	VASN_MOUSE	no	246154	Vasn	1	9	1	1	0	yes
Mouse	Q9D1T0	1 - high confidence	Leucine-rich repeat and immunoglobulin-like domain-containing nogo receptor-interacting protein 1	LIGO1_MOUSE	no	235402	Lingo1	1	5	1	1	0	yes
Mouse	Q9D387	1 - high confidence	LAMP family protein C20orf103 homolog	CT103_MOUSE	no	76161	0	1	1	1	1	0	yes
Mouse	Q9D3X9	1 - high confidence	Microfibrillar-associated protein 3-like	MFA3L_MOUSE	no	71306	Mfap3l	1	2	1	1	0	yes
Mouse	Q9D8B7	1 - high confidence	Junctional adhesion molecule C	JAM3_MOUSE	no	83964	Jam3	1	15	1	1	0	yes
Mouse	Q9D8F3	1 - high confidence	Porcine endogenous retrovirus A receptor 2 homolog	PEVR2_MOUSE	no	52710	Gpr172b	1	18	1	10	0	yes
Mouse	Q9DA75	1 - high confidence	Major facilitator superfamily domain-containing protein 2A	MFS2A_MOUSE	no	76574	Mfsd2a	1	13	1	9	0	yes
Mouse	Q9DBV4	1 - high confidence	Matrix-remodeling-associated protein 8	MXRA8_MOUSE	no	74761	Mxra8	1	7	1	1	0	yes
Mouse	Q9DBX3	1 - high confidence	Sushi domain-containing protein 2	SUSD2_MOUSE	no	71733	Susd2	1	12	1	1	0	yes
Mouse	Q9DCP2	1 - high confidence	Sodium-coupled neutral amino acid transporter 3	S38A3_MOUSE	no	76257	Slc38a3	1	9	1	11	0	yes
Mouse	Q9EP96	1 - high confidence	Solute carrier organic anion transporter family member 1A4	SO1A4_MOUSE	no	28250	Slco1a4	1	1	1	12	0	yes
Mouse	Q9EPR4	1 - high confidence	Solute carrier family 23 member 2	S23A2_MOUSE	no	54338	Slc23a2	1	3	1	12	0	yes
Mouse	Q9EPR5	1 - high confidence	VPS10 domain-containing receptor SorCS2	SORC2_MOUSE	no	81840	Sorcs2	1	6	1	1	0	yes
Mouse	Q9EPT5	1 - high confidence	Solute carrier organic anion transporter family member 2A1	SO2A1_MOUSE	no	24059	Slco2a1	1	1	1	12	0	yes
Mouse	Q9EQS9	1 - high confidence	Immunoglobulin superfamily DCC subclass member 4	IGDC4_MOUSE	no	56741	Igdcc4	1	15	1	1	0	yes
Mouse	Q9ERB5	1 - high confidence	Solute carrier organic anion transporter family member 1C1	SO1C1_MOUSE	no	58807	Slco1c1	1	1	1	11	0	yes
Mouse	Q9ES57	1 - high confidence	Cell surface glycoprotein CD200 receptor 1	MO2R1_MOUSE	no	57781	Cd200r1	1	1	1	1	0	yes
Mouse	Q9ESG4	1 - high confidence	Collectrin	TMM27_MOUSE	no	57394	Tmem27	1	1	1	1	0	yes
Mouse	Q9ESM6	1 - high confidence	Glycerophosphoinositol inositolphosphodiesterase GDPD2	GDPD2_MOUSE	no	71584	Gdpd2	1	11	1	6	0	yes
Mouse	Q9JI18	1 - high confidence	Low-density lipoprotein receptor-related protein 1B	LRP1B_MOUSE	no	94217	Lrp1b	1	3	1	1	0	yes
Mouse	Q9JIM1	1 - high confidence	Equilibrative nucleoside transporter 1	S29A1_MOUSE	no	63959	Slc29a1	1	27	1	11	0	yes
Mouse	Q9JJF9	1 - high confidence	Signal peptide peptidase-like 2A	PSL2_MOUSE	no	66552	Sppl2a	1	3	1	9	0	yes
Mouse	Q9JLL0	1 - high confidence	Cysteine-rich motor neuron 1 protein	CRIM1_MOUSE	no	50766	Crim1	1	1	1	1	0	yes
Mouse	Q9JMG4	1 - high confidence	Sodium/potassium-transporting ATPase subunit beta-1-interacting protein 4	NKAI4_MOUSE	no	58237	Nkain4	1	3	1	3	0	yes
Mouse	Q9QY40	1 - high confidence	Plexin-B3	PLXB3_MOUSE	no	140571	Plxnb3	1	2	1	1	0	yes
Mouse	Q9R0M4	1 - high confidence	Podocalyxin-like protein 1	PODXL_MOUSE	no	27205	Podxl	1	1	1	1	0	yes
Mouse	Q9R0Y8	1 - high confidence	Gamma-aminobutyric acid receptor subunit gamma-1	GBRG1_MOUSE	no	14405	Gabrg1	1	2	1	4	0	yes
Mouse	Q9R100	1 - high confidence	Cadherin-17	CAD17_MOUSE	no	12557	Cdh17	1	3	1	1	0	yes
Mouse	Q9R1W5	1 - high confidence	Calcitonin gene-related peptide type 1 receptor	CALRL_MOUSE	no	54598	Calcrl	1	22	1	7	0	yes
Mouse	Q9WTR1	1 - high confidence	Transient receptor potential cation channel subfamily V member 2	TRPV2_MOUSE	no	22368	Trpv2	1	8	1	6	0	yes
Mouse	Q9WU60	1 - high confidence	Attractin	ATRN_MOUSE	no	11990	Atrn	1	21	1	1	0	yes
Mouse	Q9WUH7	1 - high confidence	Semaphorin-4G	SEM4G_MOUSE	no	26456	Sema4g	1	3	1	1	0	yes
Mouse	Q9WV18	1 - high confidence	Gamma-aminobutyric acid type B receptor subunit 1	GABR1_MOUSE	no	54393	Gabbr1	1	3	1	7	0	yes
Mouse	Q9WVD4	1 - high confidence	H(+)/Cl(-) exchange transporter 5	CLCN5_MOUSE	no	12728	Clcn5	1	18	1	11	0	yes
Mouse	Q9WVL3	1 - high confidence	Solute carrier family 12 member 7	S12A7_MOUSE	no	20499	Slc12a7	1	29	1	12	0	yes
Mouse	Q9Z0E8	1 - high confidence	Solute carrier family 22 member 5	S22A5_MOUSE	no	20520	Slc22a5	1	7	1	12	0	yes
Mouse	Q9Z0L0	1 - high confidence	Trophoblast glycoprotein	TPBG_MOUSE	no	21983	Tpbg	1	18	1	1	0	yes
Mouse	Q9Z0L1	1 - high confidence	Sphingosine 1-phosphate receptor 4	S1PR4_MOUSE	no	13611	S1pr4	1	1	1	8	0	yes
Mouse	Q9Z138	1 - high confidence	Tyrosine-protein kinase transmembrane receptor ROR2	ROR2_MOUSE	no	26564	Ror2	1	13	1	1	0	yes
Mouse	Q9Z1M0	1 - high confidence	P2X purinoceptor 7	P2RX7_MOUSE	no	18439	P2rx7	1	23	1	2	0	yes
Mouse	Q9Z2W8	1 - high confidence	Glutamate receptor 4	GRIA4_MOUSE	no	14802	Gria4	1	5	1	3	0	yes
Mouse	Q9Z2W9	1 - high confidence	Glutamate receptor 3	GRIA3_MOUSE	no	53623	Gria3	1	5	1	3	0	yes
Mouse	P35436	1 - high confidence	Glutamate [NMDA] receptor subunit epsilon-1	NMDE1_MOUSE	no	14811	Grin2a	0.9999	1	1	4	0	yes
Mouse	Q8K1G2	1 - high confidence	Limbin	LBN_MOUSE	no	68525	Evc2	0.9999	13	1	2	0	yes
Mouse	Q8K1S4	1 - high confidence	Netrin receptor UNC5A	UNC5A_MOUSE	no	107448	Unc5a	0.9999	3	1	1	0	yes
Mouse	Q8VIM0	1 - high confidence	Hepatitis A virus cellular receptor 2 homolog	TIMD3_MOUSE	no	171285	Havcr2	0.9999	5	1	1	0	yes
Mouse	P01897	1 - high confidence	H-2 class I histocompatibility antigen, L-D alpha chain	HA1L_MOUSE	no	14980	H2-L	0.9998	11	1	1	0	yes
Mouse	Q80UP8	1 - high confidence	Sodium-dependent phosphate transporter 2	S20A2_MOUSE	no	20516	Slc20a2	0.9997	2	1	8	0	yes
Mouse	Q61559	1 - high confidence	IgG receptor FcRn large subunit p51	FCGRN_MOUSE	no	14132	Fcgrt	0.9995	1	1	1	0	yes
Mouse	P06339	1 - high confidence	H-2 class I histocompatibility antigen, D-37 alpha chain	HA15_MOUSE	no	15040	H2-T23	0.999	6	1	1	0	yes
Mouse	P01901	1 - high confidence	H-2 class I histocompatibility antigen, K-B alpha chain	HA1B_MOUSE	no	14972	H2-K1	0.9986	22	1	1	0	yes
Mouse	Q62312	1 - high confidence	TGF-beta receptor type-2	TGFR2_MOUSE	no	21813	Tgfbr2	0.9984	3	1	1	0	yes
Mouse	O35607	1 - high confidence	Bone morphogenetic protein receptor type-2	BMPR2_MOUSE	no	12168	Bmpr2	0.9981	17	1	1	0	yes
Mouse	P98154	1 - high confidence	Integral membrane protein DGCR2/IDD	IDD_MOUSE	no	13356	Dgcr2	0.9979	1	1	1	0	yes
Mouse	Q03137	1 - high confidence	Ephrin type-A receptor 4	EPHA4_MOUSE	no	13838	Epha4	0.9979	6	1	1	0	yes
Mouse	Q8BGD4	1 - high confidence	Solute carrier organic anion transporter family member 4C1	SO4C1_MOUSE	no	227394	Slco4c1	0.9979	5	1	12	0	yes
Mouse	Q8R139	1 - high confidence	Equilibrative nucleoside transporter 4	S29A4_MOUSE	no	243328	Slc29a4	0.9979	2	1	10	0	yes
Mouse	Q91WN2	1 - high confidence	Transmembrane protein 150A	T150A_MOUSE	no	232086	Tmem150A	0.9979	3	1	5	0	yes
Mouse	Q91ZV3	1 - high confidence	Discoidin, CUB and LCCL domain-containing protein 2	DCBD2_MOUSE	no	73379	Dcbld2	0.9979	10	1	1	0	yes
Mouse	Q925Q3	1 - high confidence	Sodium/potassium/calcium exchanger 6	NCKX6_MOUSE	no	170756	Slc24a6	0.9979	4	1	12	0	yes
Mouse	Q9R1V7	1 - high confidence	Disintegrin and metalloproteinase domain-containing protein 23	ADA23_MOUSE	no	23792	Adam23	0.9979	5	1	1	0	yes
Mouse	Q61526	1 - high confidence	Receptor tyrosine-protein kinase erbB-3	ERBB3_MOUSE	no	13867	Erbb3	0.9975	11	1	1	0	yes
Mouse	Q9Z2I4	1 - high confidence	Roundabout homolog 3	ROBO3_MOUSE	no	19649	Robo3	0.9974	1	1	1	0	yes
Mouse	P22723	1 - high confidence	Gamma-aminobutyric acid receptor subunit gamma-2	GBRG2_MOUSE	no	14406	Gabrg2	0.9973	1	1	4	0	yes
Mouse	P34968	1 - high confidence	5-hydroxytryptamine receptor 2C	5HT2C_MOUSE	no	15560	Htr2c	0.9973	1	1	7	0	yes
Mouse	P63080	1 - high confidence	Gamma-aminobutyric acid receptor subunit beta-3	GBRB3_MOUSE	no	14402	Gabrb3	0.9973	1	1	4	0	yes
Mouse	P97717	1 - high confidence	Alpha-1B adrenergic receptor	ADA1B_MOUSE	no	11548	Adra1b	0.9973	1	1	7	0	yes
Mouse	Q64326	1 - high confidence	Adrenocorticotropic hormone receptor	ACTHR_MOUSE	no	17200	Mc2r	0.9973	1	1	7	0	yes
Mouse	Q69ZK9	1 - high confidence	Neuroligin-2	NLGN2_MOUSE	no	216856	Nlgn2	0.9973	2	1	1	0	yes
Mouse	Q7TSK2	1 - high confidence	Seizure protein 6	SEZ6_MOUSE	no	20370	Sez6	0.9973	1	1	1	0	yes
Mouse	Q80Z10	1 - high confidence	Astrotactin-2	ASTN2_MOUSE	no	56079	Astn2	0.9973	1	1	2	0	yes
Mouse	Q80ZD8	1 - high confidence	Amphoterin-induced protein 1	AMGO1_MOUSE	no	229715	Amigo1	0.9973	2	1	1	0	yes
Mouse	Q810B8	1 - high confidence	SLIT and NTRK-like protein 4	SLIK4_MOUSE	no	245446	Slitrk4	0.9973	2	1	1	0	yes
Mouse	Q8BYG9	1 - high confidence	Ephrin type-A receptor 10	EPHAA_MOUSE	no	230735	Epha10	0.9973	2	1	1	0	yes
Mouse	Q8CAE9	1 - high confidence	Podocalyxin-like protein 2	PDXL2_MOUSE	no	319655	Podxl2	0.9973	1	1	1	0	yes
Mouse	Q8VI51	1 - high confidence	VPS10 domain-containing receptor SorCS3	SORC3_MOUSE	no	66673	Sorcs3	0.9973	2	1	1	0	yes
Mouse	Q60614	1 - high confidence	Adenosine receptor A2b	AA2BR_MOUSE	no	11541	Adora2b	0.9972	1	1	7	0	yes
Mouse	Q61627	1 - high confidence	Glutamate receptor delta-1 subunit	GRID1_MOUSE	no	14803	Grid1	0.9972	2	1	4	0	yes
Mouse	Q8BH24	1 - high confidence	Transmembrane 9 superfamily member 4	TM9S4_MOUSE	no	99237	Tm9sf4	0.9972	2	1	9	0	yes
Mouse	Q99PJ1	1 - high confidence	Protocadherin-15	PCD15_MOUSE	no	11994	Pcdh15	0.9972	2	1	1	0	yes
Mouse	Q9Z0M3	1 - high confidence	Cadherin-20	CAD20_MOUSE	no	23836	Cdh20	0.9972	2	1	1	0	yes
Mouse	P29319	1 - high confidence	Ephrin type-A receptor 3	EPHA3_MOUSE	no	13837	Epha3	0.9971	1	1	1	0	yes
Mouse	P29754	1 - high confidence	Type-1A angiotensin II receptor	AGTRA_MOUSE	no	11607	Agtr1a	0.9971	3	1	7	0	yes
Mouse	P32211	1 - high confidence	Muscarinic acetylcholine receptor M4	ACM4_MOUSE	no	12672	Chrm4	0.9971	2	1	6	0	yes
Mouse	P70211	1 - high confidence	Netrin receptor DCC	DCC_MOUSE	no	13176	Dcc	0.9971	4	1	1	0	yes
Mouse	Q32MD9	1 - high confidence	Cell adhesion molecule-related/down-regulated by oncogenes	CDON_MOUSE	no	57810	Cdon	0.9971	2	1	1	0	yes
Mouse	Q64487	1 - high confidence	Receptor-type tyrosine-protein phosphatase delta	PTPRD_MOUSE	no	19266	Ptprd	0.9971	4	1	1	0	yes
Mouse	Q6AZB0	1 - high confidence	Brother of CDO	BOC_MOUSE	no	117606	Boc	0.9971	2	1	1	0	yes
Mouse	Q8BZ81	1 - high confidence	Leucine-rich repeat transmembrane neuronal protein 3	LRRT3_MOUSE	no	216028	Lrrtm3	0.997	3	1	1	0	yes
Mouse	A2A699	1 - high confidence	Protein FAM171A2	F1712_MOUSE	no	217219	Fam171a2	0.9969	7	1	2	0	yes
Mouse	P33896	1 - high confidence	Interferon alpha/beta receptor 1	INAR1_MOUSE	no	15975	Ifnar1	0.9968	10	1	1	0	yes
Mouse	Q9JL06	1 - high confidence	Lysophosphatidic acid receptor 2	LPAR2_MOUSE	no	53978	Lpar2	0.9968	4	1	6	0	yes
Mouse	O35375	1 - high confidence	Neuropilin-2	NRP2_MOUSE	no	18187	Nrp2	0.9966	14	1	1	0	yes
Mouse	O35379	1 - high confidence	Multidrug resistance-associated protein 1	MRP1_MOUSE	no	17250	Abcc1	0.9966	11	1	17	0	yes
Mouse	P10761	1 - high confidence	Zona pellucida sperm-binding protein 3	ZP3_MOUSE	no	22788	Zp3	0.9966	2	1	1	0	yes
Mouse	P35951	1 - high confidence	Low-density lipoprotein receptor	LDLR_MOUSE	no	16835	Ldlr	0.9966	15	1	1	0	yes
Mouse	P37172	1 - high confidence	Activin receptor type-1	ACVR1_MOUSE	no	11477	Acvr1	0.9966	5	1	1	0	yes
Mouse	P52795	1 - high confidence	Ephrin-B1	EFNB1_MOUSE	no	13641	Efnb1	0.9966	10	1	1	0	yes
Mouse	P54754	1 - high confidence	Ephrin type-B receptor 3	EPHB3_MOUSE	no	13845	Ephb3	0.9966	1	1	1	0	yes
Mouse	P59383	1 - high confidence	Leucine-rich repeat neuronal protein 4	LRRN4_MOUSE	no	320974	Lrrn4	0.9966	14	1	1	0	yes
Mouse	P61622	1 - high confidence	Integrin alpha-11	ITA11_MOUSE	no	319480	Itga11	0.9966	5	1	1	0	yes
Mouse	P82347	1 - high confidence	Delta-sarcoglycan	SGCD_MOUSE	no	24052	Sgcd	0.9966	1	1	1	0	yes
Mouse	P82349	1 - high confidence	Beta-sarcoglycan	SGCB_MOUSE	no	24051	Sgcb	0.9966	16	1	1	0	yes
Mouse	Q3TWN3	1 - high confidence	Metal transporter CNNM2	CNNM2_MOUSE	no	94219	Cnnm2	0.9966	19	1	4	0	yes
Mouse	Q60750	1 - high confidence	Ephrin type-A receptor 1	EPHA1_MOUSE	no	13835	Epha1	0.9966	6	1	1	0	yes
Mouse	Q62165	1 - high confidence	Dystroglycan	DAG1_MOUSE	no	13138	Dag1	0.9966	12	1	1	0	yes
Mouse	Q64151	1 - high confidence	Semaphorin-4C	SEM4C_MOUSE	no	20353	Sema4c	0.9966	15	1	1	0	yes
Mouse	Q69ZF7	1 - high confidence	Metal transporter CNNM4	CNNM4_MOUSE	no	94220	Cnnm4	0.9966	11	1	4	0	yes
Mouse	Q6P5F7	1 - high confidence	Protein tweety homolog 3	TTYH3_MOUSE	no	78339	Ttyh3	0.9966	21	1	5	0	yes
Mouse	Q6PEM8	1 - high confidence	Proton-coupled folate transporter	PCFT_MOUSE	no	52466	Slc46a1	0.9966	23	1	12	0	yes
Mouse	Q6PFE7	1 - high confidence	Tomoregulin-1	TEFF1_MOUSE	no	230157	Tmeff1	0.9966	11	1	1	0	yes
Mouse	Q6VVW5	1 - high confidence	Atrial natriuretic peptide receptor 2	ANPRB_MOUSE	no	230103	Npr2	0.9966	6	1	1	0	yes
Mouse	Q7TT36	1 - high confidence	Probable G-protein coupled receptor 125	GP125_MOUSE	no	70693	Gpr125	0.9966	3	1	7	0	yes
Mouse	Q80W68	1 - high confidence	Kin of IRRE-like protein 1	KIRR1_MOUSE	no	170643	Kirrel	0.9966	17	1	2	0	yes
Mouse	Q8BKU8	1 - high confidence	Transmembrane protein 87B	TM87B_MOUSE	no	72477	Tmem87b	0.9966	6	1	7	0	yes
Mouse	Q8BLG2	1 - high confidence	Lysophosphatidic acid receptor 4	LPAR4_MOUSE	no	78134	Lpar4	0.9966	19	1	7	0	yes
Mouse	Q8C6Z1	1 - high confidence	Mucin-15	MUC15_MOUSE	no	269328	Muc15	0.9966	1	1	1	0	yes
Mouse	Q8C7X2	1 - high confidence	Uncharacterized protein KIAA0090	K0090_MOUSE	no	230866	Kiaa0090	0.9966	26	1	1	0	yes
Mouse	Q8K078	1 - high confidence	Solute carrier organic anion transporter family member 4A1	SO4A1_MOUSE	no	108115	Slco4a1	0.9966	11	1	12	0	yes
Mouse	Q8VI56	1 - high confidence	Low-density lipoprotein receptor-related protein 4	LRP4_MOUSE	no	228357	Lrp4	0.9966	12	1	1	0	yes
Mouse	Q91WR6	1 - high confidence	Uncharacterized protein C6orf72 homolog	CF072_MOUSE	no	215751	0	0.9966	2	1	1	0	yes
Mouse	Q9DC11	1 - high confidence	Plexin domain-containing protein 2	PXDC2_MOUSE	no	67448	Plxdc2	0.9966	2	1	1	0	yes
Mouse	Q9ET30	1 - high confidence	Transmembrane 9 superfamily member 3	TM9S3_MOUSE	no	107358	Tm9sf3	0.9966	31	1	9	0	yes
Mouse	Q9R069	1 - high confidence	Basal cell adhesion molecule	BCAM_MOUSE	no	57278	Bcam	0.9966	10	1	1	0	yes
Mouse	Q9R0M0	1 - high confidence	Cadherin EGF LAG seven-pass G-type receptor 2	CELR2_MOUSE	no	53883	Celsr2	0.9966	4	1	7	0	yes
Mouse	O55111	1 - high confidence	Desmoglein-2	DSG2_MOUSE	no	13511	Dsg2	0.9965	10	1	1	0	yes
Mouse	P97326	1 - high confidence	Cadherin-6	CADH6_MOUSE	no	12563	Cdh6	0.9965	5	1	1	0	yes
Mouse	Q61625	1 - high confidence	Glutamate receptor delta-2 subunit	GRID2_MOUSE	no	14804	Grid2	0.9965	3	1	4	0	yes
Mouse	Q61730	1 - high confidence	Interleukin-1 receptor accessory protein	IL1AP_MOUSE	no	16180	Il1rap	0.9965	18	1	1	0	yes
Mouse	Q61824	1 - high confidence	Disintegrin and metalloproteinase domain-containing protein 12	ADA12_MOUSE	no	11489	Adam12	0.9965	1	1	1	0	yes
Mouse	Q6NXK8	1 - high confidence	Amiloride-sensitive cation channel 2, neuronal	ACCN2_MOUSE	no	11419	Accn2	0.9965	2	1	1	0	yes
Mouse	Q9DBY4	1 - high confidence	Leucine-rich repeat-containing protein KIAA0644	K0644_MOUSE	no	66873	KIAA0644	0.9965	1	1	1	0	yes
Mouse	Q80TF3	1 - high confidence	Protocadherin-19	PCD19_MOUSE	no	279653	Pcdh19	0.9963	2	1	1	0	yes
Mouse	Q8JZL1	1 - high confidence	Interleukin-17 receptor D	I17RD_MOUSE	no	171463	Il17rd	0.9963	6	1	1	0	yes
Mouse	Q9D8N1	1 - high confidence	Uncharacterized protein C11orf24 homolog	CK024_MOUSE	no	72056	0	0.9963	7	1	1	0	yes
Mouse	Q8BHY3	1 - high confidence	Anoctamin-1	ANO1_MOUSE	no	101772	Ano1	0.996	4	1	8	0	yes
Mouse	Q91VN0	1 - high confidence	Low-density lipoprotein receptor-related protein 5	LRP5_MOUSE	no	16973	Lrp5	0.996	4	1	1	0	yes
Mouse	Q9Z0U9	1 - high confidence	Sphingosine 1-phosphate receptor 3	S1PR3_MOUSE	no	13610	S1pr3	0.9959	3	1	7	0	yes
Mouse	P20489	1 - high confidence	High affinity immunoglobulin epsilon receptor subunit alpha	FCERA_MOUSE	no	14125	Fcer1a	0.9956	1	1	1	0	yes
Mouse	Q9EPK8	1 - high confidence	Transient receptor potential cation channel subfamily V member 4	TRPV4_MOUSE	no	63873	Trpv4	0.9956	1	1	6	0	yes
Mouse	Q8VD31	1 - high confidence	Tapasin-related protein	TPSNR_MOUSE	no	213233	Tapbpl	0.9954	1	1	1	0	yes
Mouse	Q3UUY6	1 - high confidence	Prominin-2	PROM2_MOUSE	no	192212	Prom2	0.9951	2	1	5	0	yes
Mouse	Q8BGV3	1 - high confidence	Tumor-associated calcium signal transducer 2	TACD2_MOUSE	no	56753	Tacstd2	0.9951	5	1	1	0	yes
Mouse	Q9Z0Z4	1 - high confidence	Hephaestin	HEPH_MOUSE	no	15203	Heph	0.9951	5	1	1	0	yes
Mouse	P26011	1 - high confidence	Integrin beta-7	ITB7_MOUSE	no	16421	Itgb7	0.9949	5	1	1	0	yes
Mouse	P30987	1 - high confidence	Thromboxane A2 receptor	TA2R_MOUSE	no	21390	Tbxa2r	0.9949	2	1	7	0	yes
Mouse	P47936	1 - high confidence	Cannabinoid receptor 2	CNR2_MOUSE	no	12802	Cnr2	0.9949	1	1	7	0	yes
Mouse	Q6AXF6	1 - high confidence	SID1 transmembrane family member 1	SIDT1_MOUSE	no	320007	Sidt1	0.9949	1	1	11	0	yes
Mouse	O70394	1 - high confidence	Interleukin-27 receptor subunit alpha	I27RA_MOUSE	no	50931	Il27ra	0.9946	4	1	1	0	yes
Mouse	Q9JHX3	1 - high confidence	Interleukin-21 receptor	IL21R_MOUSE	no	60504	Il21r	0.9946	2	1	1	0	yes
Mouse	O35664	1 - high confidence	Interferon alpha/beta receptor 2	INAR2_MOUSE	no	15976	Ifnar2	0.9945	4	1	1	0	yes
Mouse	O70258	1 - high confidence	Epsilon-sarcoglycan	SGCE_MOUSE	no	20392	Sgce	0.9945	7	1	1	0	yes
Mouse	P39038	1 - high confidence	Cadherin-4	CADH4_MOUSE	no	12561	Cdh4	0.9945	3	1	1	0	yes
Mouse	P48302	1 - high confidence	Endothelin B receptor	EDNRB_MOUSE	no	13618	Ednrb	0.9945	2	1	7	0	yes
Mouse	P56481	1 - high confidence	Gastrin/cholecystokinin type B receptor	GASR_MOUSE	no	12426	Cckbr	0.9945	2	1	7	0	yes
Mouse	P56485	1 - high confidence	C-X-C chemokine receptor type 7	CXCR7_MOUSE	no	12778	Cxcr7	0.9945	5	1	7	0	yes
Mouse	P56726	1 - high confidence	Smoothened homolog	SMO_MOUSE	no	319757	Smo	0.9945	8	1	7	0	yes
Mouse	P58659	1 - high confidence	Uncharacterized protein C21orf63 homolog	CU063_MOUSE	no	70967	0	0.9945	1	1	1	0	yes
Mouse	P60882	1 - high confidence	Multiple epidermal growth factor-like domains protein 8	MEGF8_MOUSE	no	269878	Megf8	0.9945	7	1	1	0	yes
Mouse	P61793	1 - high confidence	Lysophosphatidic acid receptor 1	LPAR1_MOUSE	no	14745	Lpar1	0.9945	1	1	6	0	yes
Mouse	P70387	1 - high confidence	Hereditary hemochromatosis protein homolog	HFE_MOUSE	no	15216	Hfe	0.9945	2	1	1	0	yes
Mouse	P97468	1 - high confidence	Chemokine receptor-like 1	CML1_MOUSE	no	14747	Cmklr1	0.9945	2	1	7	0	yes
Mouse	Q3TR08	1 - high confidence	Fibronectin type III domain-containing protein 4	FNDC4_MOUSE	no	64339	Fndc4	0.9945	1	1	1	0	yes
Mouse	Q3U284	1 - high confidence	UPF0513 transmembrane protein	U513_MOUSE	no	234740	0	0.9945	1	1	2	0	yes
Mouse	Q61072	1 - high confidence	Disintegrin and metalloproteinase domain-containing protein 9	ADAM9_MOUSE	no	11502	Adam9	0.9945	10	1	1	0	yes
Mouse	Q62011	1 - high confidence	Podoplanin	PDPN_MOUSE	no	14726	Pdpn	0.9945	10	1	1	0	yes
Mouse	Q6DFX2	1 - high confidence	Anthrax toxin receptor 2	ANTR2_MOUSE	no	71914	Antxr2	0.9945	2	1	1	0	yes
Mouse	Q6XJV4	1 - high confidence	Cell surface glycoprotein CD200 receptor 4	MO2R4_MOUSE	no	239849	Cd200r4	0.9945	2	1	1	0	yes
Mouse	Q8BNA6	1 - high confidence	Protocadherin Fat 3	FAT3_MOUSE	no	270120	Fat3	0.9945	8	1	1	0	yes
Mouse	Q8C8T7	1 - high confidence	Extracellular leucine-rich repeat and fibronectin type-III domain-containing protein 1	ELFN1_MOUSE	no	243312	Elfn1	0.9945	6	1	1	0	yes
Mouse	Q8CIF6	1 - high confidence	SID1 transmembrane family member 2	SIDT2_MOUSE	no	214597	Sidt2	0.9945	9	1	11	0	yes
Mouse	Q8K1T1	1 - high confidence	Leucine-rich repeat-containing protein 25	LRC25_MOUSE	no	211228	Lrrc25	0.9945	3	1	1	0	yes
Mouse	Q8R2Q6	1 - high confidence	Tectonic-3	TECT3_MOUSE	no	67590	Tctn3	0.9945	2	1	1	0	yes
Mouse	Q99JG2	1 - high confidence	Endothelin B receptor-like protein 2	ETBR2_MOUSE	no	171469	Gpr37l1	0.9945	2	1	5	0	yes
Mouse	Q9JHE3	1 - high confidence	Neutral ceramidase	ASAH2_MOUSE	no	54447	Asah2	0.9945	1	1	1	0	yes
Mouse	Q9R1V6	1 - high confidence	Disintegrin and metalloproteinase domain-containing protein 22	ADA22_MOUSE	no	11496	Adam22	0.9945	4	1	1	0	yes
Mouse	Q9Z139	1 - high confidence	Tyrosine-protein kinase transmembrane receptor ROR1	ROR1_MOUSE	no	26563	Ror1	0.9945	1	1	2	0	yes
Mouse	P41047	1 - high confidence	Tumor necrosis factor ligand superfamily member 6	TNFL6_MOUSE	no	14103	Faslg	0.994	1	1	1	0	yes
Mouse	P50284	1 - high confidence	Tumor necrosis factor receptor superfamily member 3	TNR3_MOUSE	no	17000	Ltbr	0.9938	8	1	1	0	yes
Mouse	Q5U431	1 - high confidence	G-protein coupled receptor 39	GPR39_MOUSE	no	71111	Gpr39	0.9938	6	1	7	0	yes
Mouse	Q8R143	1 - high confidence	Pituitary tumor-transforming gene 1 protein-interacting protein	PTTG_MOUSE	no	108705	Pttg1ip	0.9938	16	1	1	0	yes
Mouse	Q8VHP6	1 - high confidence	Protocadherin-21	PCD21_MOUSE	no	170677	Pcdh21	0.9938	1	1	1	0	yes
Mouse	Q9QY96	1 - high confidence	Extracellular calcium-sensing receptor	CASR_MOUSE	no	12374	Casr	0.9938	2	1	7	0	yes
Mouse	Q64729	1 - high confidence	TGF-beta receptor type-1	TGFR1_MOUSE	no	21812	Tgfbr1	0.9937	2	1	1	0	yes
Mouse	Q9WTS5	1 - high confidence	Teneurin-2	TEN2_MOUSE	no	23964	Odz2	0.9937	7	1	1	0	yes
Mouse	Q01887	1 - high confidence	Tyrosine-protein kinase RYK	RYK_MOUSE	no	20187	Ryk	0.9935	7	1	1	0	yes
Mouse	P21447	1 - high confidence	Multidrug resistance protein 3	MDR3_MOUSE	no	18671	Abcb1a	0.9932	2	1	12	0	yes
Mouse	Q9WUP1	1 - high confidence	Receptor activity-modifying protein 3	RAMP3_MOUSE	no	56089	Ramp3	0.9932	5	1	1	0	yes
Mouse	Q60805	1 - high confidence	Tyrosine-protein kinase Mer	MERTK_MOUSE	no	17289	Mertk	0.9931	2	1	1	0	yes
Mouse	Q8BYM5	1 - high confidence	Neuroligin-3	NLGN3_MOUSE	no	245537	Nlgn3	0.9931	3	1	1	0	yes
Mouse	Q9D3A9	1 - high confidence	Protein tweety homolog 1	TTYH1_MOUSE	no	57776	Ttyh1	0.9931	2	1	5	0	yes
Mouse	Q9JIP4	1 - high confidence	Pannexin-1	PANX1_MOUSE	no	55991	Panx1	0.9931	14	1	4	0	yes
Mouse	Q9QYS2	1 - high confidence	Metabotropic glutamate receptor 3	GRM3_MOUSE	no	108069	Grm3	0.9931	4	1	7	0	yes
Mouse	Q14B62	1 - high confidence	Patched domain-containing protein 1	PTHD1_MOUSE	no	211612	Ptchd1	0.9929	3	1	12	0	yes
Mouse	Q9JJR8	1 - high confidence	Transmembrane protein 9B	TMM9B_MOUSE	no	56786	Tmem9b	0.9929	6	1	1	0	yes
Mouse	P55144	1 - high confidence	Tyrosine-protein kinase receptor TYRO3	TYRO3_MOUSE	no	22174	Tyro3	0.9925	13	1	1	0	yes
Mouse	P70193	1 - high confidence	Leucine-rich repeats and immunoglobulin-like domains protein 1	LRIG1_MOUSE	no	16206	Lrig1	0.9924	7	1	1	0	yes
Mouse	B0V2N1	1 - high confidence	Receptor-type tyrosine-protein phosphatase S	PTPRS_MOUSE	no	19280	Ptprs	0.9922	9	1	1	0	yes
Mouse	P20826	1 - high confidence	Kit ligand	SCF_MOUSE	no	17311	Kitlg	0.9922	1	1	1	0	yes
Mouse	P55288	1 - high confidence	Cadherin-11	CAD11_MOUSE	no	12552	Cdh11	0.9922	2	1	1	0	yes
Mouse	Q80XU8	1 - high confidence	Leucine-rich repeat and fibronectin type-III domain-containing protein 4	LRFN4_MOUSE	no	225875	Lrfn4	0.9922	2	1	1	0	yes
Mouse	Q8BR86	1 - high confidence	Kin of IRRE-like protein 3	KIRR3_MOUSE	no	67703	Kirrel3	0.9922	2	1	1	0	yes
Mouse	Q9EQD0	1 - high confidence	Frizzled-5	FZD5_MOUSE	no	14367	Fzd5	0.9921	1	1	7	0	yes
Mouse	Q8BHE4	1 - high confidence	Transmembrane protein 108	TM108_MOUSE	no	81907	Tmem108	0.992	3	1	1	0	yes
Mouse	O35516	1 - high confidence	Neurogenic locus notch homolog protein 2	NOTC2_MOUSE	no	18129	Notch2	0.9914	2	1	1	0	yes
Mouse	Q9ER65	1 - high confidence	Calsyntenin-2	CSTN2_MOUSE	no	64085	Clstn2	0.9914	1	1	1	0	yes
Mouse	Q8CI85	1 - high confidence	Carbonic anhydrase 12	CAH12_MOUSE	no	76459	Ca12	0.9912	1	1	1	0	yes
Mouse	P35802	1 - high confidence	Neuronal membrane glycoprotein M6-a	GPM6A_MOUSE	no	234267	Gpm6a	0.991	4	1	4	0	yes
Mouse	A2ARA8	1 - high confidence	Integrin alpha-8 [Cleaved into: Integrin alpha-8 heavy chain; Integrin alpha-8 light chain]	ITA8_MOUSE	no	241226	Itga8	0.9906	1	1	1	0	yes
Mouse	Q8VCJ6	1 - high confidence	Mas-related G-protein coupled receptor member F	MRGRF_MOUSE	no	211577	Mrgprf	0.9906	1	1	7	0	yes
Mouse	Q7TPD3	1 - high confidence	Roundabout homolog 2	ROBO2_MOUSE	no	268902	Robo2	0.9902	6	1	1	0	yes
Mouse	P23819	1 - high confidence	Glutamate receptor 2	GRIA2_MOUSE	no	14800	Gria2	0.9901	6	1	3	0	yes
Mouse	P27040	1 - high confidence	Activin receptor type-2B	AVR2B_MOUSE	no	11481	Acvr2b	0.99	2	1	1	0	yes
Mouse	Q60519	1 - high confidence	Semaphorin-5B	SEM5B_MOUSE	no	20357	Sema5b	0.9898	13	1	1	0	yes
Mouse	Q8BGT0	1 - high confidence	Osteopetrosis-associated transmembrane protein 1	OSTM1_MOUSE	no	14628	Ostm1	0.9897	10	1	1	0	yes
Mouse	Q99NH8	1 - high confidence	Triggering receptor expressed on myeloid cells 2	TREM2_MOUSE	no	83433	Trem2	0.9893	2	1	1	0	yes
Mouse	Q9D780	1 - high confidence	SLAM family member 9	SLAF9_MOUSE	no	98365	Slamf9	0.9893	1	1	1	0	yes
Mouse	Q3TYX2	1 - high confidence	LRRN4 C-terminal-like protein	LRN4L_MOUSE	no	68852	Lrrn4cl	0.9889	7	1	1	0	yes
Mouse	Q8CG64	1 - high confidence	Fukutin-related protein	FKRP_MOUSE	no	243853	Fkrp	0.9887	7	1	1	0	yes
Mouse	O89026	1 - high confidence	Roundabout homolog 1	ROBO1_MOUSE	no	19876	Robo1	0.9885	6	1	1	0	yes
Mouse	Q9D4J3	1 - high confidence	Discoidin, CUB and LCCL domain-containing protein 1	DCBD1_MOUSE	no	66686	Dcbld1	0.9883	4	1	1	0	yes
Mouse	Q9JIF3	1 - high confidence	Solute carrier family 2, facilitated glucose transporter member 8	GTR8_MOUSE	no	56017	Slc2a8	0.9882	10	1	12	0	yes
Mouse	Q52KR2	1 - high confidence	Leucine-rich repeats and immunoglobulin-like domains protein 2	LRIG2_MOUSE	no	269473	Lrig2	0.9881	8	1	1	0	yes
Mouse	Q6PHS9	1 - high confidence	Voltage-dependent calcium channel subunit alpha-2/delta-2	CA2D2_MOUSE	no	56808	Cacna2d2	0.9871	8	1	1	0	yes
Mouse	Q75VT8	1 - high confidence	Protein HIDE1	HIDE1_MOUSE	no	382062	Hide1	0.9854	2	1	1	0	yes
Mouse	Q9JKA5	1 - high confidence	Cell surface A33 antigen	GPA33_MOUSE	no	59290	Gpa33	0.9823	3	1	1	0	yes
Mouse	Q9D659	1 - high confidence	Platelet receptor Gi24	GI24_MOUSE	no	74048	0	0.9812	21	1	1	0	yes
Mouse	Q62035	1 - high confidence	Platelet-activating factor receptor	PTAFR_MOUSE	no	19204	Ptafr	0.9774	1	1	7	0	yes
Mouse	Q78IQ7	1 - high confidence	Zinc transporter ZIP4	S39A4_MOUSE	no	72027	Slc39a4	0.9752	1	1	6	0	yes
Mouse	Q8CB67	1 - high confidence	Low-density lipoprotein receptor-related protein 11	LRP11_MOUSE	no	237253	Lrp11	0.9743	1	1	1	0	yes
Mouse	Q8BFU7	1 - high confidence	Putative P2Y purinoceptor 10	P2Y10_MOUSE	no	78826	P2ry10	0.9725	13	1	7	0	yes
Mouse	Q6PDJ1	1 - high confidence	VWFA and cache domain-containing protein 1	CAHD1_MOUSE	no	320508	Cachd1	0.9713	3	1	1	0	yes
Mouse	Q61614	1 - high confidence	Endothelin-1 receptor	EDNRA_MOUSE	no	13617	Ednra	0.9683	3	1	7	0	yes
Mouse	P35917	1 - high confidence	Vascular endothelial growth factor receptor 3	VGFR3_MOUSE	no	14257	Flt4	0.9677	5	1	1	0	yes
Mouse	Q9ET39	1 - high confidence	SLAM family member 6	SLAF6_MOUSE	no	30925	Slamf6	0.9584	2	1	1	0	yes
Mouse	P70180	1 - high confidence	Atrial natriuretic peptide receptor 3	ANPRC_MOUSE	no	18162	Npr3	0.9569	1	1	1	0	yes
Mouse	Q8BMK4	1 - high confidence	Cytoskeleton-associated protein 4	CKAP4_MOUSE	no	216197	Ckap4	0.9507	3	1	1	0	yes
Mouse	Q80TG9	1 - high confidence	Leucine-rich repeat and fibronectin type-III domain-containing protein 2	LRFN2_MOUSE	no	70530	Lrfn2	0.9383	1	1	1	0	yes
Mouse	Q504P2	1 - high confidence	C-type lectin domain family 12 member A	CL12A_MOUSE	no	232413	Clec12a	0.9379	1	1	1	0	yes
Mouse	Q8K5B1	1 - high confidence	Interleukin-31 receptor subunit alpha	IL31R_MOUSE	no	218624	Il31ra	0.9134	4	1	1	0	yes
Mouse	P39087	1 - high confidence	Glutamate receptor, ionotropic kainate 2	GRIK2_MOUSE	no	14806	Grik2	0.9008	13	1	3	0	yes
Mouse	Q9D6W7	1 - high confidence	CD164 sialomucin-like 2 protein	C16L2_MOUSE	no	69655	Cd164l2	0.8915	1	1	1	0	yes
Mouse	Q925F2	1 - high confidence	Endothelial cell-selective adhesion molecule	ESAM_MOUSE	no	69524	Esam	0.8735	1	1	1	0	yes
Mouse	O08852	1 - high confidence	Polycystin-1	PKD1_MOUSE	no	18763	Pkd1	0.8349	1	1	11	0	yes
Mouse	P24638	1 - high confidence	Lysosomal acid phosphatase	PPAL_MOUSE	no	11432	Acp2	1	15	1	1	0	yes
Mouse	P24668	1 - high confidence	Cation-dependent mannose-6-phosphate receptor	MPRD_MOUSE	no	17113	M6pr	1	31	1	1	0	yes
Mouse	P28078	1 - high confidence	Class II histocompatibility antigen, M alpha chain	2DMA_MOUSE	no	14998	H2-DMa	1	4	1	1	0	yes
Mouse	Q3TB92	1 - high confidence	Mast cell antigen 32	MCA32_MOUSE	no	380732	Mca32	1	13	1	1	0	yes
Mouse	Q3TD49	1 - high confidence	Signal peptide peptidase-like 2B	PSL1_MOUSE	no	73218	Sppl2b	1	12	1	9	0	yes
Mouse	Q640R3	1 - high confidence	Hepatocyte cell adhesion molecule	HECAM_MOUSE	no	72927	Hepacam	1	7	1	1	0	yes
Mouse	Q69ZS6	1 - high confidence	Synaptic vesicle glycoprotein 2C	SV2C_MOUSE	no	75209	Sv2c	1	1	1	12	0	yes
Mouse	Q6GU68	1 - high confidence	Immunoglobulin superfamily containing leucine-rich repeat protein	ISLR_MOUSE	no	26968	Islr	1	2	1	1	0	yes
Mouse	Q6NXM3	1 - high confidence	Transmembrane protein 130	TM130_MOUSE	no	243339	Tmem130	1	1	1	1	0	yes
Mouse	Q7TQA1	1 - high confidence	Immunoglobulin superfamily member 1	IGSF1_MOUSE	no	209268	Igsf1	1	5	1	3	0	yes
Mouse	Q8BJ48	1 - high confidence	N-acetylglucosamine-1-phosphodiester alpha-N-acetylglucosaminidase	NAGPA_MOUSE	no	27426	Nagpa	1	3	1	1	0	yes
Mouse	Q8BXZ1	1 - high confidence	Protein disulfide-isomerase TMX3	TMX3_MOUSE	no	67988	Tmx3	1	6	1	1	0	yes
Mouse	Q8K4Z2	1 - high confidence	Fibronectin type III domain-containing protein 5	FNDC5_MOUSE	no	384061	Fndc5	1	3	1	1	0	yes
Mouse	Q8R1V4	1 - high confidence	Transmembrane emp24 domain-containing protein 4	TMED4_MOUSE	no	103694	Tmed4	1	16	1	2	0	yes
Mouse	Q91YQ5	1 - high confidence	Dolichyl-diphosphooligosaccharide--protein glycosyltransferase subunit 1	RPN1_MOUSE	no	103963	Rpn1	1	22	1	1	0	yes
Mouse	Q922P8	1 - high confidence	Transmembrane protein 132A	T132A_MOUSE	no	98170	Tmem132a	1	8	1	1	0	yes
Mouse	Q99KF1	1 - high confidence	Transmembrane emp24 domain-containing protein 9	TMED9_MOUSE	no	67511	Tmed9	1	20	1	1	0	yes
Mouse	Q99P91	1 - high confidence	Transmembrane glycoprotein NMB	GPNMB_MOUSE	no	93695	Gpnmb	1	8	1	1	0	yes
Mouse	Q9CPW5	1 - high confidence	Translocon-associated protein subunit beta	SSRB_MOUSE	no	66256	Ssr2	1	18	1	1	0	yes
Mouse	Q9CR23	1 - high confidence	Transmembrane protein 9	TMEM9_MOUSE	no	66241	Tmem9	1	10	1	1	0	yes
Mouse	Q9CXI3	1 - high confidence	DBH-like monooxygenase protein 1	MOXD1_MOUSE	no	59012	Moxd1	1	2	1	1	0	yes
Mouse	Q9CY50	1 - high confidence	Translocon-associated protein subunit alpha	SSRA_MOUSE	no	107513	Ssr1	1	6	1	1	0	yes
Mouse	Q9DBG6	1 - high confidence	Dolichyl-diphosphooligosaccharide--protein glycosyltransferase subunit 2	RPN2_MOUSE	no	20014	Rpn2	1	15	1	3	0	yes
Mouse	Q9DBH5	1 - high confidence	Vesicular integral-membrane protein VIP36	LMAN2_MOUSE	no	66890	Lman2	1	20	1	1	0	yes
Mouse	Q9JHJ3	1 - high confidence	Lysosomal protein NCU-G1	NCUG1_MOUSE	no	56700	0	1	23	1	1	0	yes
Mouse	Q9JIS5	1 - high confidence	Synaptic vesicle glycoprotein 2A	SV2A_MOUSE	no	64051	Sv2a	1	11	1	12	0	yes
Mouse	Q9QY81	1 - high confidence	Nuclear pore membrane glycoprotein 210	PO210_MOUSE	no	54563	Nup210	1	10	1	1	0	yes
Mouse	Q9R1Q9	1 - high confidence	V-type proton ATPase subunit S1	VAS1_MOUSE	no	54411	Atp6ap1	1	18	1	1	0	yes
Mouse	Q9WTZ2	1 - high confidence	Membrane-bound transcription factor site-1 protease	MBTP1_MOUSE	no	56453	Mbtps1	1	5	1	1	0	yes
Mouse	Q9EQG7	1 - high confidence	Ectonucleotide pyrophosphatase/phosphodiesterase family member 5	ENPP5_MOUSE	no	83965	Enpp5	0.9999	2	1	1	0	yes
Mouse	Q9Z2G6	1 - high confidence	Protein sel-1 homolog 1	SE1L1_MOUSE	no	20338	Sel1l	0.9999	19	1	1	0	yes
Mouse	P59481	1 - high confidence	VIP36-like protein	LMA2L_MOUSE	no	214895	Lman2l	0.9994	10	1	1	0	yes
Mouse	Q8BXQ2	1 - high confidence	GPI transamidase component PIG-T	PIGT_MOUSE	no	78928	Pigt	0.9966	13	1	1	0	yes
Mouse	Q9DBU0	1 - high confidence	Transmembrane 9 superfamily member 1	TM9S1_MOUSE	no	74140	Tm9sf1	0.9966	10	1	9	0	yes
Mouse	O54965	1 - high confidence	RING finger protein 13	RNF13_MOUSE	no	24017	Rnf13	0.996	7	1	1	0	yes
Mouse	O35604	1 - high confidence	Niemann-Pick C1 protein	NPC1_MOUSE	no	18145	Npc1	0.9953	20	1	13	0	yes
Mouse	Q3TXX4	1 - high confidence	Vesicular glutamate transporter 1	VGLU1_MOUSE	no	72961	Slc17a7	0.9949	1	1	8	0	yes
Mouse	Q8BG39	1 - high confidence	Synaptic vesicle glycoprotein 2B	SV2B_MOUSE	no	64176	Sv2b	0.9938	2	1	12	0	yes
Mouse	O08912	1 - high confidence	Polypeptide N-acetylgalactosaminyltransferase 1	GALT1_MOUSE	no	14423	Galnt1	0.9925	2	1	1	0	yes
Mouse	Q8VCM8	1 - high confidence	Nicalin	NCLN_MOUSE	no	103425	Ncln	0.9872	5	1	2	0	yes
Mouse	Q99KW9	1 - high confidence	T-cell immunomodulatory protein	TIP_MOUSE	no	71927	Itfg1	0.9852	17	1	1	0	yes
Mouse	Q9JL18	1 - high confidence	Beta-secretase 2	BACE2_MOUSE	no	56175	Bace2	0.98	1	1	1	0	yes
Mouse	Q62277	1 - high confidence	Synaptophysin	SYPH_MOUSE	no	20977	Syp	0.9755	4	1	3	0	yes
Mouse	Q8BGN8	1 - high confidence	Synaptoporin	SYNPR_MOUSE	no	72003	Synpr	0.9532	1	1	3	0	yes
Mouse	P14142	1 - high confidence	Solute carrier family 2, facilitated glucose transporter member 4	GTR4_MOUSE	no	20528	Slc2a4	0.9117	9	1	12	0	yes
Mouse	O08602	1 - high confidence	Retinoic acid early-inducible protein 1-alpha	RAE1A_MOUSE	no	19368	Raet1a	1	18	1	1	1	yes
Mouse	O08604	1 - high confidence	Retinoic acid early-inducible protein 1-gamma	RAE1C_MOUSE	no	19370	Raet1c	1	1	1	1	1	yes
Mouse	O35136	1 - high confidence	Neural cell adhesion molecule 2	NCAM2_MOUSE	no	17968	Ncam2	1	5	1	1	1	yes
Mouse	P12960	1 - high confidence	Contactin-1	CNTN1_MOUSE	no	12805	Cntn1	1	7	1	1	1	yes
Mouse	P97785	1 - high confidence	GDNF family receptor alpha-1	GFRA1_MOUSE	no	14585	Gfra1	1	10	1	1	1	yes
Mouse	Q07409	1 - high confidence	Contactin-3	CNTN3_MOUSE	no	18488	Cntn3	1	3	1	1	1	yes
Mouse	Q7TSP5	1 - high confidence	V-set domain containing T-cell activation inhibitor 1	VTCN1_MOUSE	no	242122	Vtcn1	1	2	1	2	1	yes
Mouse	Q80V42	1 - high confidence	Carboxypeptidase M	CBPM_MOUSE	no	70574	Cpm	1	19	1	1	1	yes
Mouse	Q80Z24	1 - high confidence	Neuronal growth regulator 1	NEGR1_MOUSE	no	320840	Negr1	1	5	1	1	1	yes
Mouse	Q8CFZ4	1 - high confidence	Glypican-3 [Cleaved into: Secreted glypican-3]	GPC3_MOUSE	no	14734	Gpc3	1	8	1	1	1	yes
Mouse	Q99PI8	1 - high confidence	Reticulon-4 receptor	RTN4R_MOUSE	no	65079	Rtn4r	1	1	1	1	1	yes
Mouse	Q9CZQ6	1 - high confidence	Retinoic acid early-inducible protein 1-epsilon	RAE1E_MOUSE	no	379043	Raet1e	1	2	1	1	1	yes
Mouse	Q9QZF2	1 - high confidence	Glypican-1 [Cleaved into: Secreted glypican-1]	GPC1_MOUSE	no	14733	Gpc1	1	18	1	1	1	yes
Mouse	Q9Z0J1	1 - high confidence	Reversion-inducing cysteine-rich protein with Kazal motifs	RECK_MOUSE	no	53614	Reck	1	1	1	1	1	yes
Mouse	Q9Z0K8	1 - high confidence	Pantetheinase	VNN1_MOUSE	no	22361	Vnn1	1	4	1	1	1	yes
Mouse	P60755	1 - high confidence	MAM domain-containing glycosylphosphatidylinositol anchor protein 2	MDGA2_MOUSE	no	320772	Mdga2	0.9973	4	1	1	1	yes
Mouse	O08545	1 - high confidence	Ephrin-A3	EFNA3_MOUSE	no	13638	Efna3	0.9972	3	1	1	1	yes
Mouse	O08603	1 - high confidence	Retinoic acid early-inducible protein 1-beta	RAE1B_MOUSE	no	19369	Raet1b	0.9966	10	1	1	1	yes
Mouse	Q9WTR5	1 - high confidence	Cadherin-13	CAD13_MOUSE	no	12554	Cdh13	0.9966	11	1	1	1	yes
Mouse	Q61468	1 - high confidence	Mesothelin	MSLN_MOUSE	no	56047	Msln	0.9949	1	1	1	1	yes
Mouse	O35975	1 - high confidence	T-cell ecto-ADP-ribosyltransferase 2	NAR2B_MOUSE	no	11872	Art2b	0.9925	1	1	1	1	yes
Mouse	Q62086	3 - unspecific	Serum paraoxonase/arylesterase 2	PON2_MOUSE	no	330260	Pon2	1	1	0	0	0	#N/A
Mouse	P17439	3 - unspecific	Glucosylceramidase	GLCM_MOUSE	no	14466	Gba	1	23	0	0	0	#N/A
Mouse	Q8CFG0	3 - unspecific	Extracellular sulfatase Sulf-2	SULF2_MOUSE	no	72043	Sulf2	1	8	0	0	0	#N/A
Mouse	Q8K007	3 - unspecific	Extracellular sulfatase Sulf-1	SULF1_MOUSE	no	240725	Sulf1	1	1	0	0	0	#N/A
Mouse	Q8R180	3 - unspecific	ERO1-like protein alpha	ERO1A_MOUSE	no	50527	Ero1l	1	9	0	0	0	#N/A
Mouse	Q8R2E9	3 - unspecific	ERO1-like protein beta	ERO1B_MOUSE	no	67475	Ero1lb	1	5	0	0	0	#N/A
Mouse	Q9JLB4	3 - unspecific	Cubilin	CUBN_MOUSE	no	65969	Cubn	1	7	0	0	0	#N/A
Mouse	Q9R0B9	3 - unspecific	Procollagen-lysine,2-oxoglutarate 5-dioxygenase 2	PLOD2_MOUSE	no	26432	Plod2	1	13	0	0	0	#N/A
Mouse	Q9R0E2	3 - unspecific	Procollagen-lysine,2-oxoglutarate 5-dioxygenase 1	PLOD1_MOUSE	no	18822	Plod1	1	11	0	0	0	#N/A
Mouse	Q9R0E1	3 - unspecific	Procollagen-lysine,2-oxoglutarate 5-dioxygenase 3	PLOD3_MOUSE	no	26433	Plod3	0.9974	16	0	0	0	#N/A
Mouse	P55302	3 - unspecific	Alpha-2-macroglobulin receptor-associated protein	AMRP_MOUSE	no	16976	Lrpap1	0.9966	3	0	0	0	#N/A
Mouse	Q05769	3 - unspecific	Prostaglandin G/H synthase 2	PGH2_MOUSE	no	19225	Ptgs2	0.9928	3	0	0	0	#N/A
Mouse	P08113	3 - unspecific	Endoplasmin	ENPL_MOUSE	no	22027	Hsp90b1	1	23	0	0	0	#N/A
Mouse	P16675	3 - unspecific	Lysosomal protective protein	PPGB_MOUSE	no	19025	Ctsa	1	3	0	0	0	#N/A
Mouse	P21661	3 - unspecific	Neuroendocrine convertase 2	NEC2_MOUSE	no	18549	Pcsk2	1	8	0	0	0	#N/A
Mouse	P24369	3 - unspecific	Peptidyl-prolyl cis-trans isomerase B	PPIB_MOUSE	no	19035	Ppib	1	9	0	0	0	#N/A
Mouse	P35441	3 - unspecific	Thrombospondin-1	TSP1_MOUSE	no	21825	Thbs1	1	18	0	0	0	#N/A
Mouse	P97821	3 - unspecific	Dipeptidyl peptidase 1	CATC_MOUSE	no	13032	Ctsc	1	2	0	0	0	#N/A
Mouse	Q61576	3 - unspecific	Peptidyl-prolyl cis-trans isomerase FKBP10	FKB10_MOUSE	no	14230	Fkbp10	1	7	0	0	0	#N/A
Mouse	Q8BFR4	3 - unspecific	N-acetylglucosamine-6-sulfatase	GNS_MOUSE	no	75612	Gns	1	3	0	0	0	#N/A
Mouse	Q8BH97	3 - unspecific	Reticulocalbin-3	RCN3_MOUSE	no	52377	Rcn3	1	3	0	0	0	#N/A
Mouse	Q920P3	3 - unspecific	Deleted in bladder cancer protein 1 homolog	DBC1_MOUSE	no	56710	Dbc1	1	2	0	0	0	#N/A
Mouse	Q9CQF9	3 - unspecific	Prenylcysteine oxidase	PCYOX_MOUSE	no	66881	Pcyox1	1	16	0	0	0	#N/A
Mouse	Q9D7J6	3 - unspecific	Deoxyribonuclease-1-like 1	DNSL1_MOUSE	no	69537	Dnase1l1	1	6	0	0	0	#N/A
Mouse	Q9ER41	3 - unspecific	Torsin-1B	TOR1B_MOUSE	no	30934	Tor1b	1	5	0	0	0	#N/A
Mouse	Q9JHP7	3 - unspecific	KDEL motif-containing protein 1	KDEL1_MOUSE	no	72050	Kdelc1	1	7	0	0	0	#N/A
Mouse	Q9JKR6	3 - unspecific	Hypoxia up-regulated protein 1	HYOU1_MOUSE	no	12282	Hyou1	1	25	0	0	0	#N/A
Mouse	Q9QWR8	3 - unspecific	Alpha-N-acetylgalactosaminidase	NAGAB_MOUSE	no	17939	Naga	1	2	0	0	0	#N/A
Mouse	Q9Z247	3 - unspecific	Peptidyl-prolyl cis-trans isomerase FKBP9	FKBP9_MOUSE	no	27055	Fkbp9	1	4	0	0	0	#N/A
Mouse	O89023	3 - unspecific	Tripeptidyl-peptidase 1	TPP1_MOUSE	no	12751	Tpp1	0.9979	5	0	0	0	#N/A
Mouse	Q9ER38	3 - unspecific	Torsin-3A	TOR3A_MOUSE	no	30935	Tor3a	0.9979	6	0	0	0	#N/A
Mouse	Q9EPL4	3 - unspecific	Methyltransferase-like protein 9	METL9_MOUSE	no	59052	Mettl9	0.9972	4	0	0	0	#N/A
Mouse	Q9R013	3 - unspecific	Cathepsin F	CATF_MOUSE	no	56464	Ctsf	0.9972	5	0	0	0	#N/A
Mouse	Q3UMW8	3 - unspecific	Ceroid-lipofuscinosis neuronal protein 5 homolog	CLN5_MOUSE	no	211286	Cln5	0.9971	2	0	0	0	#N/A
Mouse	P06797	3 - unspecific	Cathepsin L1	CATL1_MOUSE	no	13039	Ctsl1	0.9966	9	0	0	0	#N/A
Mouse	P15089	3 - unspecific	Mast cell carboxypeptidase A	CBPA3_MOUSE	no	12873	Cpa3	0.9966	1	0	0	0	#N/A
Mouse	P29416	3 - unspecific	Beta-hexosaminidase subunit alpha	HEXA_MOUSE	no	15211	Hexa	0.9966	10	0	0	0	#N/A
Mouse	Q60715	3 - unspecific	Prolyl 4-hydroxylase subunit alpha-1	P4HA1_MOUSE	no	18451	P4ha1	0.9966	14	0	0	0	#N/A
Mouse	Q8K297	3 - unspecific	Procollagen galactosyltransferase 1	GT251_MOUSE	no	234407	Glt25d1	0.9966	14	0	0	0	#N/A
Mouse	Q8R0F3	3 - unspecific	Sulfatase-modifying factor 1	SUMF1_MOUSE	no	58911	Sumf1	0.9966	7	0	0	0	#N/A
Mouse	Q9WV54	3 - unspecific	Acid ceramidase	ASAH1_MOUSE	no	11886	Asah1	0.9966	22	0	0	0	#N/A
Mouse	Q8BM72	3 - unspecific	Heat shock 70 kDa protein 13	HSP13_MOUSE	no	110920	Hspa13	0.9965	1	0	0	0	#N/A
Mouse	P12265	3 - unspecific	Beta-glucuronidase	BGLR_MOUSE	no	110006	Gusb	0.9962	3	0	0	0	#N/A
Mouse	O09159	3 - unspecific	Lysosomal alpha-mannosidase	MA2B1_MOUSE	no	17159	Man2b1	0.996	7	0	0	0	#N/A
Mouse	P04214	3 - unspecific	T-cell receptor beta chain V region E1	TVB6_MOUSE	no	0	0	0.9944	2	0	0	0	#N/A
Mouse	Q2HXL6	3 - unspecific	ER degradation-enhancing alpha-mannosidase-like 3	EDEM3_MOUSE	no	66967	Edem3	0.994	3	0	0	0	#N/A
Mouse	Q8BYB9	3 - unspecific	KTEL motif-containing protein 1	KTEL1_MOUSE	no	224143	Ktelc1	0.994	5	0	0	0	#N/A
Mouse	Q8VHI3	3 - unspecific	GDP-fucose protein O-fucosyltransferase 2	OFUT2_MOUSE	no	80294	Pofut2	0.9931	2	0	0	0	#N/A
Mouse	P20060	3 - unspecific	Beta-hexosaminidase subunit beta	HEXB_MOUSE	no	15212	Hexb	0.9929	5	0	0	0	#N/A
Mouse	Q60716	3 - unspecific	Prolyl 4-hydroxylase subunit alpha-2	P4HA2_MOUSE	no	18452	P4ha2	0.9928	2	0	0	0	#N/A
Mouse	Q9EPK6	3 - unspecific	Nucleotide exchange factor SIL1	SIL1_MOUSE	no	81500	Sil1	0.9908	5	0	0	0	#N/A
Mouse	P19324	3 - unspecific	Serpin H1	SERPH_MOUSE	no	12406	Serpinh1	0.9862	10	0	0	0	#N/A
Mouse	O08795	3 - unspecific	Glucosidase 2 subunit beta	GLU2B_MOUSE	no	19089	Prkcsh	0.9435	2	0	0	0	#N/A
Mouse	O70423	3 - unspecific	Membrane primary amine oxidase	AOC3_MOUSE	no	11754	Aoc3	1	2	0	0	0	#N/A
Mouse	Q8VDX6	3 - unspecific	Transmembrane protein 5	TMEM5_MOUSE	no	216395	Tmem5	1	4	0	0	0	#N/A
Mouse	Q99JP7	3 - unspecific	Gamma-glutamyltransferase 7	GGT7_MOUSE	no	207182	Ggt7	1	9	0	0	0	#N/A
Mouse	Q9Z2A9	3 - unspecific	Gamma-glutamyltransferase 5	GGT5_MOUSE	no	23887	Ggt5	1	7	0	0	0	#N/A
Mouse	Q99J85	3 - unspecific	Neuronal pentraxin receptor	NPTXR_MOUSE	no	73340	Nptxr	0.9966	8	0	0	0	#N/A
Mouse	Q9QYK5	3 - unspecific	Heparan-sulfate 6-O-sulfotransferase 1	H6ST1_MOUSE	no	50785	Hs6st1	0.9957	1	0	0	0	#N/A
Mouse	Q6NSU3	3 - unspecific	Glycosyltransferase 8 domain-containing protein 1	GL8D1_MOUSE	no	76485	Glt8d1	0.9938	10	0	0	0	#N/A
Mouse	Q3UHH8	3 - unspecific	Glucoside xylosyltransferase 1	GXLT1_MOUSE	no	223827	Gxylt1	0.9361	3	0	0	0	#N/A
Mouse	Q6A058	3 - unspecific	Armadillo repeat-containing X-linked protein 2	ARMX2_MOUSE	no	67416	Armcx2	0.89	3	0	0	0	#N/A
Mouse	O09009	3 - unspecific	Beta-1,3-N-acetylglucosaminyltransferase radical fringe	RFNG_MOUSE	no	19719	Rfng	1	3	0	0	0	#N/A
Mouse	O09010	3 - unspecific	Beta-1,3-N-acetylglucosaminyltransferase lunatic fringe	LFNG_MOUSE	no	16848	Lfng	1	3	0	0	0	#N/A
Mouse	P68372	3 - unspecific	Tubulin beta-2C chain	TBB2C_MOUSE	no	227613	Tubb2c	1	10	0	0	0	#N/A
Mouse	P99024	3 - unspecific	Tubulin beta-5 chain	TBB5_MOUSE	no	22154	Tubb5	1	17	0	0	0	#N/A
Mouse	Q09200	3 - unspecific	Beta-1,4 N-acetylgalactosaminyltransferase 1	B4GN1_MOUSE	no	14421	B4galnt1	1	2	0	0	0	#N/A
Mouse	Q68FD5	3 - unspecific	Clathrin heavy chain 1	CLH_MOUSE	no	67300	Cltc	1	7	0	0	0	#N/A
Mouse	Q6ZQ11	3 - unspecific	Chondroitin sulfate synthase 1	CHSS1_MOUSE	no	269941	Chsy1	1	4	0	0	0	#N/A
Mouse	Q8BLF1	3 - unspecific	Neutral cholesterol ester hydrolase 1	ADCL1_MOUSE	no	320024	Nceh1	1	6	0	0	0	#N/A
Mouse	Q8VEK3	3 - unspecific	Heterogeneous nuclear ribonucleoprotein U	HNRPU_MOUSE	no	51810	Hnrnpu	1	12	0	0	0	#N/A
Mouse	Q922F4	3 - unspecific	Tubulin beta-6 chain	TBB6_MOUSE	no	67951	Tubb6	1	1	0	0	0	#N/A
Mouse	Q9CR89	3 - unspecific	Endoplasmic reticulum-Golgi intermediate compartment protein 2	ERGI2_MOUSE	no	67456	Ergic2	1	7	0	0	0	#N/A
Mouse	Q9EP78	3 - unspecific	Carbohydrate sulfotransferase 7	CHST7_MOUSE	no	60322	Chst7	1	7	0	0	0	#N/A
Mouse	Q7TMM9	3 - unspecific	Tubulin beta-2A chain	TBB2A_MOUSE	no	22151	Tubb2a	0.9994	2	0	0	0	#N/A
Mouse	Q91Z92	3 - unspecific	Beta-1,3-galactosyltransferase 6	B3GT6_MOUSE	no	117592	B3galt6	0.9979	8	0	0	0	#N/A
Mouse	Q922Q6	3 - unspecific	Abhydrolase domain-containing protein 14A	ABHEA_MOUSE	no	68644	Abhd14a	0.9979	11	0	0	0	#N/A
Mouse	P61315	3 - unspecific	Galactose-3-O-sulfotransferase 3	G3ST3_MOUSE	no	545276	Gal3st3	0.9971	5	0	0	0	#N/A
Mouse	Q5F2L2	3 - unspecific	Alpha-(1,3)-fucosyltransferase 10	FUT10_MOUSE	no	171167	Fut10	0.9971	2	0	0	0	#N/A
Mouse	Q9CQ75	3 - unspecific	NADH dehydrogenase [ubiquinone] 1 alpha subcomplex subunit 2	NDUA2_MOUSE	no	17991	Ndufa2	0.997	1	0	0	0	#N/A
Mouse	Q8BHT6	3 - unspecific	Beta-1,3-glucosyltransferase	B3GLT_MOUSE	no	381694	B3galtl	0.9969	2	0	0	0	#N/A
Mouse	Q812F8	3 - unspecific	Alpha-1,3-mannosyl-glycoprotein 4-beta-N-acetylglucosaminyltransferase B	MGT4B_MOUSE	no	103534	Mgat4b	0.9966	8	0	0	0	#N/A
Mouse	Q8R3H7	3 - unspecific	Heparan sulfate 2-O-sulfotransferase 1	HS2ST_MOUSE	no	23908	Hs2st1	0.9966	19	0	0	0	#N/A
Mouse	Q91XA2	3 - unspecific	Golgi membrane protein 1	GOLM1_MOUSE	no	105348	Golm1	0.9966	20	0	0	0	#N/A
Mouse	Q921V5	3 - unspecific	Alpha-1,6-mannosyl-glycoprotein 2-beta-N-acetylglucosaminyltransferase	MGAT2_MOUSE	no	217664	Mgat2	0.9966	8	0	0	0	#N/A
Mouse	Q9EPS3	3 - unspecific	D-glucuronyl C5-epimerase	GLCE_MOUSE	no	93683	Glce	0.9966	3	0	0	0	#N/A
Mouse	Q91Y74	3 - unspecific	CMP-N-acetylneuraminate-beta-galactosamide-alpha-2,3-sialyltransferase 4	SIA4C_MOUSE	no	20443	St3gal4	0.9965	4	0	0	0	#N/A
Mouse	O54904	3 - unspecific	Beta-1,3-galactosyltransferase 1	B3GT1_MOUSE	no	26877	B3galt1	0.9962	3	0	0	0	#N/A
Mouse	O35696	3 - unspecific	Alpha-2,8-sialyltransferase 8B	SIA8B_MOUSE	no	20450	St8sia2	0.996	3	0	0	0	#N/A
Mouse	Q91YY2	3 - unspecific	Beta-1,4-galactosyltransferase 3	B4GT3_MOUSE	no	57370	B4galt3	0.9953	4	0	0	0	#N/A
Mouse	P58158	3 - unspecific	Galactosylgalactosylxylosylprotein 3-beta-glucuronosyltransferase 3	B3GA3_MOUSE	no	72727	B3gat3	0.9951	1	0	0	0	#N/A
Mouse	Q9QXL1	3 - unspecific	Kinesin-like protein KIF21B	KI21B_MOUSE	no	16565	Kif21b	0.9946	21	0	0	0	#N/A
Mouse	O88856	3 - unspecific	Protein-tyrosine sulfotransferase 2	TPST2_MOUSE	no	22022	Tpst2	0.9928	4	0	0	0	#N/A
Mouse	Q9JME2	3 - unspecific	Carbohydrate sulfotransferase 11	CHSTB_MOUSE	no	58250	Chst11	0.9928	4	0	0	0	#N/A
Mouse	Q9CQA3	3 - unspecific	Succinate dehydrogenase [ubiquinone] iron-sulfur subunit, mitochondrial	DHSB_MOUSE	no	67680	Sdhb	0.9914	1	0	0	0	#N/A
Mouse	Q01063	3 - unspecific	cAMP-specific 3',5'-cyclic phosphodiesterase 4D	PDE4D_MOUSE	no	238871	Pde4d	0.9876	1	0	0	0	#N/A
Mouse	Q9D620	3 - unspecific	Rab11 family-interacting protein 1	RFIP1_MOUSE	no	75767	Rab11fip1	0.9865	4	0	0	0	#N/A
Mouse	P00186	3 - unspecific	Cytochrome P450 1A2	CP1A2_MOUSE	no	13077	Cyp1a2	0.9839	3	0	0	0	#N/A
Mouse	Q91XQ0	3 - unspecific	Dynein heavy chain 8, axonemal	DYH8_MOUSE	no	13417	Dnahc8	0.8731	1	0	0	0	#N/A
Mouse	O88477	3 - unspecific	Insulin-like growth factor 2 mRNA-binding protein 1	IF2B1_MOUSE	no	140486	Igf2bp1	1	2	0	0	0	#N/A
Mouse	P03995	3 - unspecific	Glial fibrillary acidic protein	GFAP_MOUSE	no	14580	Gfap	1	5	0	0	0	#N/A
Mouse	P07901	3 - unspecific	Heat shock protein HSP 90-alpha	HS90A_MOUSE	no	15519	Hsp90aa1	1	13	0	0	0	#N/A
Mouse	P11499	3 - unspecific	Heat shock protein HSP 90-beta	HS90B_MOUSE	no	15516	Hsp90ab1	1	14	0	0	0	#N/A
Mouse	P14115	3 - unspecific	60S ribosomal protein L27a	RL27A_MOUSE	no	26451	Rpl27a	1	17	0	0	0	#N/A
Mouse	P15864	3 - unspecific	Histone H1.2	H12_MOUSE	no	50708	Hist1h1c	1	17	0	0	0	#N/A
Mouse	P16858	3 - unspecific	Glyceraldehyde-3-phosphate dehydrogenase	G3P_MOUSE	no	14433	Gapdh	1	24	0	0	0	#N/A
Mouse	P27659	3 - unspecific	60S ribosomal protein L3	RL3_MOUSE	no	27367	Rpl3	1	14	0	0	0	#N/A
Mouse	P35980	3 - unspecific	60S ribosomal protein L18	RL18_MOUSE	no	19899	Rpl18	1	20	0	0	0	#N/A
Mouse	P43277	3 - unspecific	Histone H1.3	H13_MOUSE	no	14957	Hist1h1d	1	7	0	0	0	#N/A
Mouse	P51410	3 - unspecific	60S ribosomal protein L9	RL9_MOUSE	no	20005	Rpl9	1	20	0	0	0	#N/A
Mouse	P51880	3 - unspecific	Fatty acid-binding protein, brain	FABP7_MOUSE	no	12140	Fabp7	1	3	0	0	0	#N/A
Mouse	P52480	3 - unspecific	Pyruvate kinase isozymes M1/M2	KPYM_MOUSE	no	18746	Pkm2	1	20	0	0	0	#N/A
Mouse	P58252	3 - unspecific	Elongation factor 2	EF2_MOUSE	no	13629	Eef2	1	17	0	0	0	#N/A
Mouse	P62317	3 - unspecific	Small nuclear ribonucleoprotein Sm D2	SMD2_MOUSE	no	107686	Snrpd2	1	3	0	0	0	#N/A
Mouse	P62821	3 - unspecific	Ras-related protein Rab-1A	RAB1A_MOUSE	no	19324	Rab1A	1	2	0	0	0	#N/A
Mouse	P63017	3 - unspecific	Heat shock cognate 71 kDa protein	HSP7C_MOUSE	no	15481	Hspa8	1	14	0	0	0	#N/A
Mouse	P63038	3 - unspecific	60 kDa heat shock protein, mitochondrial	CH60_MOUSE	no	15510	Hspd1	1	14	0	0	0	#N/A
Mouse	P84104	3 - unspecific	Splicing factor, arginine/serine-rich 3	SFRS3_MOUSE	no	20383	Sfrs3	1	8	0	0	0	#N/A
Mouse	P99027	3 - unspecific	60S acidic ribosomal protein P2	RLA2_MOUSE	no	67186	Rplp2	1	11	0	0	0	#N/A
Mouse	Q8CGC7	3 - unspecific	Bifunctional aminoacyl-tRNA synthetase [Includes: Glutamyl-tRNA synthetase	SYEP_MOUSE	no	107508	Eprs	1	5	0	0	0	#N/A
Mouse	Q8K2B0	3 - unspecific	Synaptonemal complex protein SC65	SC65_MOUSE	no	66180	Sc65	1	8	0	0	0	#N/A
Mouse	Q9CPR4	3 - unspecific	60S ribosomal protein L17	RL17_MOUSE	no	319195	Rpl17	1	3	0	0	0	#N/A
Mouse	Q9D8E6	3 - unspecific	60S ribosomal protein L4	RL4_MOUSE	no	67891	Rpl4	1	12	0	0	0	#N/A
Mouse	Q9DCX2	3 - unspecific	ATP synthase subunit d, mitochondrial	ATP5H_MOUSE	no	71679	Atp5h	1	2	0	0	0	#N/A
Mouse	P09405	3 - unspecific	Nucleolin	NUCL_MOUSE	no	17975	Ncl	0.9999	10	0	0	0	#N/A
Mouse	P43274	3 - unspecific	Histone H1.4	H14_MOUSE	no	50709	Hist1h1e	0.9999	20	0	0	0	#N/A
Mouse	P62911	3 - unspecific	60S ribosomal protein L32	RL32_MOUSE	no	19951	Rpl32	0.9999	8	0	0	0	#N/A
Mouse	Q3THE2	3 - unspecific	Myosin regulatory light chain 12B	ML12B_MOUSE	no	67938	Myl12b	0.9999	1	0	0	0	#N/A
Mouse	Q6ZWV7	3 - unspecific	60S ribosomal protein L35	RL35_MOUSE	no	66489	Rpl35	0.9999	6	0	0	0	#N/A
Mouse	Q91V92	3 - unspecific	ATP-citrate synthase	ACLY_MOUSE	no	104112	Acly	0.9999	3	0	0	0	#N/A
Mouse	Q9Z2C9	3 - unspecific	Myotubularin-related protein 7	MTMR7_MOUSE	no	54384	Mtmr7	0.9994	22	0	0	0	#N/A
Mouse	P16381	3 - unspecific	Putative ATP-dependent RNA helicase Pl10	DDX3L_MOUSE	no	110957	D1Pas1	0.9992	6	0	0	0	#N/A
Mouse	P62245	3 - unspecific	40S ribosomal protein S15a	RS15A_MOUSE	no	267019	Rps15a	0.9987	6	0	0	0	#N/A
Mouse	Q9CQT2	3 - unspecific	RNA-binding protein 7	RBM7_MOUSE	no	67010	Rbm7	0.9974	1	0	0	0	#N/A
Mouse	Q9CZ42	3 - unspecific	Carbohydrate kinase domain-containing protein	CARKD_MOUSE	no	69225	Carkd	0.9973	3	0	0	0	#N/A
Mouse	Q8CG48	3 - unspecific	Structural maintenance of chromosomes protein 2	SMC2_MOUSE	no	14211	Smc2	0.9971	2	0	0	0	#N/A
Mouse	O55142	3 - unspecific	60S ribosomal protein L35a	RL35A_MOUSE	no	57808	Rpl35a	0.9966	8	0	0	0	#N/A
Mouse	P97315	3 - unspecific	Cysteine and glycine-rich protein 1	CSRP1_MOUSE	no	13007	Csrp1	0.9966	3	0	0	0	#N/A
Mouse	Q62318	3 - unspecific	Transcription intermediary factor 1-beta	TIF1B_MOUSE	no	21849	Trim28	0.9966	10	0	0	0	#N/A
Mouse	Q60930	3 - unspecific	Voltage-dependent anion-selective channel protein 2	VDAC2_MOUSE	no	22334	Vdac2	0.9959	17	0	0	0	#N/A
Mouse	Q9CQN1	3 - unspecific	Heat shock protein 75 kDa, mitochondrial	TRAP1_MOUSE	no	68015	Trap1	0.9959	4	0	0	0	#N/A
Mouse	O09167	3 - unspecific	60S ribosomal protein L21	RL21_MOUSE	no	19933	Rpl21	0.9954	5	0	0	0	#N/A
Mouse	Q9D1M4	3 - unspecific	Eukaryotic translation elongation factor 1 epsilon-1	MCA3_MOUSE	no	66143	Eef1e1	0.9954	1	0	0	0	#N/A
Mouse	O35129	3 - unspecific	Prohibitin-2	PHB2_MOUSE	no	12034	Phb2	0.995	7	0	0	0	#N/A
Mouse	Q9ESX5	3 - unspecific	H/ACA ribonucleoprotein complex subunit 4	DKC1_MOUSE	no	245474	Dkc1	0.995	1	0	0	0	#N/A
Mouse	P06336	3 - unspecific	Ig epsilon chain C region	IGHE_MOUSE	no	0	0	0.9949	1	0	0	0	#N/A
Mouse	P60335	3 - unspecific	Poly(rC)-binding protein 1	PCBP1_MOUSE	no	23983	Pcbp1	0.9947	2	0	0	0	#N/A
Mouse	P62267	3 - unspecific	40S ribosomal protein S23	RS23_MOUSE	no	66475	Rps23	0.9941	10	0	0	0	#N/A
Mouse	P50516	3 - unspecific	V-type proton ATPase catalytic subunit A	VATA_MOUSE	no	11964	Atp6v1a	0.9938	1	0	0	0	#N/A
Mouse	Q9ESJ0	3 - unspecific	Exportin-4	XPO4_MOUSE	no	57258	Xpo4	0.9938	1	0	0	0	#N/A
Mouse	Q9D883	3 - unspecific	Splicing factor U2AF 35 kDa subunit	U2AF1_MOUSE	no	108121	U2af1	0.9912	1	0	0	0	#N/A
Mouse	Q99L45	3 - unspecific	Eukaryotic translation initiation factor 2 subunit 2	IF2B_MOUSE	no	67204	Eif2s2	0.9906	4	0	0	0	#N/A
Mouse	Q64467	3 - unspecific	Glyceraldehyde-3-phosphate dehydrogenase, testis-specific	G3PT_MOUSE	no	14447	Gapdhs	0.99	2	0	0	0	#N/A
Mouse	P50580	3 - unspecific	Proliferation-associated protein 2G4	PA2G4_MOUSE	no	18813	Pa2g4	0.9885	8	0	0	0	#N/A
Mouse	Q8CG03	3 - unspecific	cGMP-specific 3',5'-cyclic phosphodiesterase	PDE5A_MOUSE	no	242202	Pde5a	0.9868	1	0	0	0	#N/A
Mouse	Q8BWT1	3 - unspecific	3-ketoacyl-CoA thiolase, mitochondrial	THIM_MOUSE	no	52538	Acaa2	0.9817	3	0	0	0	#N/A
Mouse	A2A6M5	3 - unspecific	Calcium-binding and coiled-coil domain-containing protein 2	CACO2_MOUSE	no	76815	Calcoco2	0.9811	1	0	0	0	#N/A
Mouse	Q9D1R9	3 - unspecific	60S ribosomal protein L34	RL34_MOUSE	no	68436	Rpl34	0.98	4	0	0	0	#N/A
Mouse	A2ASS6	3 - unspecific	Titin	TITIN_MOUSE	no	22138	Ttn	0.9717	2	0	0	0	#N/A
Mouse	P62242	3 - unspecific	40S ribosomal protein S8	RS8_MOUSE	no	20116	Rps8	0.9681	14	0	0	0	#N/A
Mouse	Q8K3M5	3 - unspecific	CDK5 and ABL1 enzyme substrate 2	CABL2_MOUSE	no	252966	Cables2	0.9615	2	0	0	0	#N/A
Mouse	Q80TE4	3 - unspecific	Signal-induced proliferation-associated 1-like protein 2	SI1L2_MOUSE	no	244668	Sipa1l2	0.96	21	0	0	0	#N/A
Mouse	Q64737	3 - unspecific	Trifunctional purine biosynthetic protein adenosine-3 [Includes: Phosphoribosylamine--glycine ligase	PUR2_MOUSE	no	14450	Gart	0.92	4	0	0	0	#N/A
Mouse	Q99PP2	3 - unspecific	Zinc finger protein 318	ZN318_MOUSE	no	57908	Znf318	0.91	7	0	0	0	#N/A
Mouse	P42228	3 - unspecific	Signal transducer and activator of transcription 4	STAT4_MOUSE	no	20849	Stat4	0.9077	3	0	0	0	#N/A
Mouse	Q9D6Z1	3 - unspecific	Nucleolar protein 56	NOP56_MOUSE	no	67134	Nop56	0.9046	5	0	0	0	#N/A
Mouse	P17918	3 - unspecific	Proliferating cell nuclear antigen	PCNA_MOUSE	no	18538	Pcna	0.9	1	0	0	0	#N/A
Mouse	P54797	3 - unspecific	Ser/Thr-rich protein T10 in DGCR region	T10_MOUSE	no	0	T10	0.8848	3	0	0	0	#N/A
Mouse	O35134	3 - unspecific	DNA-directed RNA polymerase I subunit RPA1	RPA1_MOUSE	no	20019	Polr1a	0.88	4	0	0	0	#N/A
Mouse	Q8CFL8	3 - unspecific	Zinc finger SWIM domain-containing protein 3	ZSWM3_MOUSE	no	67538	Zswim3	0.88	1	0	0	0	#N/A
Mouse	Q7TT23	3 - unspecific	Uncharacterized protein C20orf194 homolog	CT194_MOUSE	no	228602	0	0.8766	1	0	0	0	#N/A
Mouse	P97313	3 - unspecific	DNA-dependent protein kinase catalytic subunit	PRKDC_MOUSE	no	19090	Prkdc	0.829	1	0	0	0	#N/A
Mouse	Q8C310	2 - putative	Roundabout homolog 4	ROBO4_MOUSE	no	74144	Robo4	0.9933	2	1	1	0	#N/A
Mouse	P70699	2 - putative	Lysosomal alpha-glucosidase	LYAG_MOUSE	no	14387	Gaa	1	14	1	1	0	#N/A
Mouse	A2AVZ9	2 - putative	Solute carrier family 43 member 3	S43A3_MOUSE	no	58207	Slc43a3	1	8	1	12	0	#N/A
Mouse	O35874	2 - putative	Neutral amino acid transporter A	SATT_MOUSE	no	55963	Slc1a4	1	28	1	9	0	#N/A
Mouse	O55026	2 - putative	Ectonucleoside triphosphate diphosphohydrolase 2	ENTP2_MOUSE	no	12496	Entpd2	1	18	1	1	0	#N/A
Mouse	O55192	2 - putative	Sodium-dependent noradrenaline transporter	SC6A2_MOUSE	no	20538	Slc6a2	1	4	1	12	0	#N/A
Mouse	O70472	2 - putative	Transmembrane protein 131	TM131_MOUSE	no	56030	Tmem131	1	5	1	2	0	#N/A
Mouse	O88627	2 - putative	Sodium/nucleoside cotransporter 2	S28A2_MOUSE	no	269346	Slc28a2	1	9	1	13	0	#N/A
Mouse	P01849	2 - putative	T-cell receptor alpha chain C region	TCA_MOUSE	no	0	0	1	3	1	1	0	#N/A
Mouse	P01851	2 - putative	T-cell receptor beta-2 chain C region	TCB2_MOUSE	no	0	0	1	4	1	1	0	#N/A
Mouse	P01895	2 - putative	H-2 class I histocompatibility antigen, alpha chain	HA1Y_MOUSE	no	14964	H2-D1	1	3	1	1	0	#N/A
Mouse	P04227	2 - putative	H-2 class II histocompatibility antigen, A-Q alpha chain	HA2Q_MOUSE	no	14960	H2-Aa	1	1	1	1	0	#N/A
Mouse	P13808	2 - putative	Anion exchange protein 2	B3A2_MOUSE	no	20535	Slc4a2	1	2	1	13	0	#N/A
Mouse	P28571	2 - putative	Sodium- and chloride-dependent glycine transporter 1	SC6A9_MOUSE	no	14664	Slc6a9	1	9	1	12	0	#N/A
Mouse	P31650	2 - putative	Sodium- and chloride-dependent GABA transporter 3	S6A11_MOUSE	no	243616	Slc6a11	1	5	1	11	0	#N/A
Mouse	P32037	2 - putative	Solute carrier family 2, facilitated glucose transporter member 3	GTR3_MOUSE	no	20527	Slc2a3	1	29	1	11	0	#N/A
Mouse	P41155	2 - putative	Lymphotoxin-beta	TNFC_MOUSE	no	16994	Ltb	1	3	1	1	0	#N/A
Mouse	P41233	2 - putative	ATP-binding cassette sub-family A member 1	ABCA1_MOUSE	no	11303	Abca1	1	21	1	14	0	#N/A
Mouse	P41234	2 - putative	ATP-binding cassette sub-family A member 2	ABCA2_MOUSE	no	11305	Abca2	1	6	1	14	0	#N/A
Mouse	P41274	2 - putative	Tumor necrosis factor ligand superfamily member 9	TNFL9_MOUSE	no	21950	Tnfsf9	1	1	1	1	0	#N/A
Mouse	P43006	2 - putative	Excitatory amino acid transporter 2	EAA2_MOUSE	no	20511	Slc1a2	1	16	1	9	0	#N/A
Mouse	P47801	2 - putative	Epithelial membrane protein 1	EMP1_MOUSE	no	13730	Emp1	1	16	1	3	0	#N/A
Mouse	P51830	2 - putative	Adenylate cyclase type 9	ADCY9_MOUSE	no	11515	Adcy9	1	17	1	12	0	#N/A
Mouse	P51906	2 - putative	Excitatory amino acid transporter 3	EAA3_MOUSE	no	20510	Slc1a1	1	1	1	10	0	#N/A
Mouse	P55012	2 - putative	Solute carrier family 12 member 2	S12A2_MOUSE	no	20496	Slc12a2	1	26	1	12	0	#N/A
Mouse	P56564	2 - putative	Excitatory amino acid transporter 1	EAA1_MOUSE	no	20512	Slc1a3	1	17	1	7	0	#N/A
Mouse	P56677	2 - putative	Suppressor of tumorigenicity 14 protein homolog	ST14_MOUSE	no	19143	St14	1	17	1	1	0	#N/A
Mouse	Q3TWI9	2 - putative	Transmembrane protein 63B	TM63B_MOUSE	no	224807	Tmem63b	1	18	1	11	0	#N/A
Mouse	Q3UHH2	2 - putative	Solute carrier family 22 member 23	S22AN_MOUSE	no	73102	Slc22a23	1	10	1	11	0	#N/A
Mouse	Q3UHK6	2 - putative	Teneurin-4	TEN4_MOUSE	no	23966	Odz4	1	21	1	1	0	#N/A
Mouse	Q3UP23	2 - putative	Transmembrane protein 26	TMM26_MOUSE	no	327766	Tmem26	1	8	1	7	0	#N/A
Mouse	Q5FWI3	2 - putative	Transmembrane protein 2	TMEM2_MOUSE	no	83921	Tmem2	1	29	1	1	0	#N/A
Mouse	Q5XF89	2 - putative	Probable cation-transporting ATPase 13A3	AT133_MOUSE	no	224088	Atp13a3	1	20	1	11	0	#N/A
Mouse	Q60660	2 - putative	Killer cell lectin-like receptor 2	KLRA2_MOUSE	no	16633	Klra2	1	4	1	1	0	#N/A
Mouse	Q61115	2 - putative	Protein patched homolog 1	PTC1_MOUSE	no	19206	Ptch1	1	6	1	12	0	#N/A
Mouse	Q62273	2 - putative	Sulfate transporter	S26A2_MOUSE	no	13521	Slc26a2	1	15	1	12	0	#N/A
Mouse	Q64302	2 - putative	Transmembrane 4 L6 family member 1	T4S1_MOUSE	no	17112	Tm4sf1	1	8	1	4	0	#N/A
Mouse	Q68FD9	2 - putative	UPF0606 protein KIAA1549	K1549_MOUSE	no	330286	Kiaa1549	1	13	1	2	0	#N/A
Mouse	Q69ZQ1	2 - putative	Uncharacterized family 31 glucosidase KIAA1161	K1161_MOUSE	no	329828	Kiaa1161	1	15	1	1	0	#N/A
Mouse	Q6P2L7	2 - putative	Protein CASC4	CASC4_MOUSE	no	319996	Casc4	1	15	1	1	0	#N/A
Mouse	Q80UW0	2 - putative	Heparan-sulfate 6-O-sulfotransferase 2	H6ST2_MOUSE	no	50786	Hs6st2	1	1	1	2	0	#N/A
Mouse	Q80V26	2 - putative	Inositol monophosphatase 3	IMPA3_MOUSE	no	242291	Impad1	1	11	1	1	0	#N/A
Mouse	Q80WG5	2 - putative	Leucine-rich repeat-containing protein 8A	LRC8A_MOUSE	no	241296	Lrrc8a	1	10	1	4	0	#N/A
Mouse	Q80X71	2 - putative	Transmembrane protein 106B	T106B_MOUSE	no	71900	Tmem106b	1	14	1	1	0	#N/A
Mouse	Q8BFZ2	2 - putative	Lipid phosphate phosphatase-related protein type 1	LPPR1_MOUSE	no	0	Lppr1	1	2	1	6	0	#N/A
Mouse	Q8BG16	2 - putative	Orphan sodium- and chloride-dependent neurotransmitter transporter NTT73	S6A15_MOUSE	no	103098	Slc6a15	1	2	1	12	0	#N/A
Mouse	Q8BS35	2 - putative	Transmembrane protein 195	TM195_MOUSE	no	319660	Tmem195	1	1	1	6	0	#N/A
Mouse	Q8BSM7	2 - putative	Large neutral amino acids transporter small subunit 3	LAT3_MOUSE	no	72401	Slc43a1	1	20	1	12	0	#N/A
Mouse	Q8BY89	2 - putative	Choline transporter-like protein 2	CTL2_MOUSE	no	68682	Slc44a2	1	31	1	11	0	#N/A
Mouse	Q8BYI8	2 - putative	Uncharacterized protein KIAA1467	K1467_MOUSE	no	74525	Kiaa1467	1	12	1	1	0	#N/A
Mouse	Q8C0Z1	2 - putative	Protein ITFG3	ITFG3_MOUSE	no	106581	Itfg3	1	29	1	1	0	#N/A
Mouse	Q8CBX0	2 - putative	Transmembrane protein 63C	TM63C_MOUSE	no	217733	Tmem63c	1	1	1	9	0	#N/A
Mouse	Q8CJ91	2 - putative	CD209 antigen-like protein B	C209B_MOUSE	no	69165	Cd209b	1	3	1	1	0	#N/A
Mouse	Q8K0E3	2 - putative	Sodium/myo-inositol cotransporter 2	SC5AB_MOUSE	no	233836	Slc5a11	1	6	1	14	0	#N/A
Mouse	Q8K385	2 - putative	Ferric-chelate reductase 1	FRRS1_MOUSE	no	20321	FRRS1	1	12	1	6	0	#N/A
Mouse	Q8K4Q8	2 - putative	Collectin-12	COL12_MOUSE	no	140792	Colec12	1	16	1	1	0	#N/A
Mouse	Q8QZW3	2 - putative	Protein FAM151A	F151A_MOUSE	no	230579	Fam151a	1	1	1	1	0	#N/A
Mouse	Q8R502	2 - putative	Leucine-rich repeat-containing protein 8C	LRC8C_MOUSE	no	100604	Lrrc8c	1	5	1	4	0	#N/A
Mouse	Q8VBW1	2 - putative	Sodium- and chloride-dependent creatine transporter 1	SC6A8_MOUSE	no	102857	Slc6a8	1	14	1	12	0	#N/A
Mouse	Q8VEK0	2 - putative	Cell cycle control protein 50A	CC50A_MOUSE	no	69981	Tmem30a	1	8	1	2	0	#N/A
Mouse	Q91W10	2 - putative	Zinc transporter ZIP8	S39A8_MOUSE	no	67547	Slc39a8	1	1	1	6	0	#N/A
Mouse	Q91W98	2 - putative	Solute carrier family 15 member 4	S15A4_MOUSE	no	100561	Slc15a4	1	8	1	11	0	#N/A
Mouse	Q91YT8	2 - putative	Transmembrane protein 63A	TM63A_MOUSE	no	208795	Tmem63a	1	4	1	11	0	#N/A
Mouse	Q921V7	2 - putative	Choline transporter-like protein 3	CTL3_MOUSE	no	213603	Slc44a3	1	1	1	8	0	#N/A
Mouse	Q9CQ88	2 - putative	Tetraspanin-31	TSN31_MOUSE	no	67125	Tspan31	1	22	1	4	0	#N/A
Mouse	Q9CQX5	2 - putative	Claudin domain-containing protein 1	CLDN1_MOUSE	no	224250	Cldnd1	1	28	1	4	0	#N/A
Mouse	Q9CZR2	2 - putative	N-acetylated-alpha-linked acidic dipeptidase 2	NALD2_MOUSE	no	72560	Naalad2	1	2	1	1	0	#N/A
Mouse	Q9D771	2 - putative	Transmembrane protein 206	TM206_MOUSE	no	66950	Tmem206	1	12	1	2	0	#N/A
Mouse	Q9DBP0	2 - putative	Sodium-dependent phosphate transport protein 2B	NPT2B_MOUSE	no	20531	Slc34a2	1	3	1	9	0	#N/A
Mouse	Q9ES07	2 - putative	Solute carrier family 15 member 2	S15A2_MOUSE	no	57738	Slc15a2	1	4	1	12	0	#N/A
Mouse	Q9JJX6	2 - putative	P2X purinoceptor 4	P2RX4_MOUSE	no	18438	P2rx4	1	15	1	2	0	#N/A
Mouse	Q9JKZ2	2 - putative	Sodium/myo-inositol cotransporter	SC5A3_MOUSE	no	53881	Slc5a3	1	23	1	13	0	#N/A
Mouse	Q9JMI0	2 - putative	Endothelin-converting enzyme-like 1	ECEL1_MOUSE	no	13599	Ecel1	1	1	1	1	0	#N/A
Mouse	Q9WTS6	2 - putative	Teneurin-3	TEN3_MOUSE	no	23965	Odz3	1	19	1	1	0	#N/A
Mouse	Q9Z306	2 - putative	Solute carrier family 22 member 4	S22A4_MOUSE	no	30805	Slc22a4	1	1	1	11	0	#N/A
Mouse	P11370	2 - putative	Retrovirus-related Env polyprotein from Fv-4 locus	ENV2_MOUSE	no	14352	Fv4	0.9997	4	1	1	0	#N/A
Mouse	Q6ZQE4	2 - putative	Transmembrane protein 194A	T194A_MOUSE	no	210035	Tmem194a	0.9979	7	1	6	0	#N/A
Mouse	Q80XL7	2 - putative	Metallophosphoesterase 1	MPPE1_MOUSE	no	225651	Mppe1	0.9979	2	1	2	0	#N/A
Mouse	Q8BG19	2 - putative	Transmembrane and TPR repeat-containing protein 4	TMTC4_MOUSE	no	70551	Tmtc4	0.9979	4	1	12	0	#N/A
Mouse	Q8BHG3	2 - putative	Cell cycle control protein 50B	CC50B_MOUSE	no	238257	Tmem30b	0.9979	1	1	2	0	#N/A
Mouse	Q8BX35	2 - putative	Tumor necrosis factor receptor superfamily member 27	TNR27_MOUSE	no	245527	Eda2r	0.9979	2	1	1	0	#N/A
Mouse	Q9D7N9	2 - putative	Adipocyte plasma membrane-associated protein	APMAP_MOUSE	no	71881	Apmap	0.9979	11	1	1	0	#N/A
Mouse	Q9Z1X2	2 - putative	Phosphatidylserine synthase 2	PTSS2_MOUSE	no	27388	Ptdss2	0.9979	3	1	9	0	#N/A
Mouse	O55017	2 - putative	Voltage-dependent N-type calcium channel subunit alpha-1B	CAC1B_MOUSE	no	12287	Cacna1b	0.9973	1	1	23	0	#N/A
Mouse	Q6NXK7	2 - putative	Inactive dipeptidyl peptidase 10	DPP10_MOUSE	no	269109	Dpp10	0.9973	1	1	1	0	#N/A
Mouse	Q8R420	2 - putative	ATP-binding cassette sub-family A member 3	ABCA3_MOUSE	no	27410	Abca3	0.9973	2	1	12	0	#N/A
Mouse	Q8BMD6	2 - putative	UPF0679 protein C14orf101 homolog	CN101_MOUSE	no	218989	0	0.9972	2	1	10	0	#N/A
Mouse	Q8BXJ9	2 - putative	Transmembrane protein 62	TMM62_MOUSE	no	96957	Tmem62	0.9972	2	1	5	0	#N/A
Mouse	Q8CHX6	2 - putative	Membrane-bound transcription factor site-2 protease	MBTP2_MOUSE	no	270669	Mbtps2	0.9972	3	1	7	0	#N/A
Mouse	Q8BGQ6	2 - putative	EF-hand domain-containing protein KIAA0494	K0494_MOUSE	no	0	Kiaa0494	0.997	2	1	1	0	#N/A
Mouse	P49282	2 - putative	Natural resistance-associated macrophage protein 2	NRAM2_MOUSE	no	18174	Slc11a2	0.9966	4	1	12	0	#N/A
Mouse	P51912	2 - putative	Neutral amino acid transporter B(0)	AAAT_MOUSE	no	20514	Slc1a5	0.9966	8	1	9	0	#N/A
Mouse	Q3TBN1	2 - putative	UPF0458 protein C7orf42 homolog	CG042_MOUSE	no	71667	0	0.9966	11	1	2	0	#N/A
Mouse	Q3TDN0	2 - putative	Protein dispatched homolog 1	DISP1_MOUSE	no	68897	Disp1	0.9966	8	1	12	0	#N/A
Mouse	Q8BGD6	2 - putative	Putative sodium-coupled neutral amino acid transporter 9	S38A9_MOUSE	no	268706	Slc38a9	0.9966	1	1	11	0	#N/A
Mouse	Q921R7	2 - putative	Probable UDP-sugar transporter protein SLC35A5	S35A5_MOUSE	no	74102	Slc35a5	0.9966	6	1	10	0	#N/A
Mouse	Q922J6	2 - putative	Tetraspanin-2	TSN2_MOUSE	no	70747	Tspan2	0.9966	6	1	4	0	#N/A
Mouse	Q99PN0	2 - putative	Sodium/iodide cotransporter	SC5A5_MOUSE	no	114479	Slc5a5	0.9966	1	1	13	0	#N/A
Mouse	Q9JIP7	2 - putative	Solute carrier family 15 member 1	S15A1_MOUSE	no	56643	Slc15a1	0.9966	4	1	10	0	#N/A
Mouse	Q9JIS8	2 - putative	Solute carrier family 12 member 4	S12A4_MOUSE	no	20498	Slc12a4	0.9966	29	1	14	0	#N/A
Mouse	Q9R0A1	2 - putative	Chloride channel protein 2	CLCN2_MOUSE	no	12724	Clcn2	0.9966	13	1	12	0	#N/A
Mouse	Q3TB48	2 - putative	Transmembrane protein 104	TM104_MOUSE	no	320534	Tmem104	0.9965	3	1	9	0	#N/A
Mouse	Q9QY33	2 - putative	Tetraspanin-3	TSN3_MOUSE	no	56434	Tspan3	0.9965	22	1	4	0	#N/A
Mouse	Q02013	2 - putative	Aquaporin-1	AQP1_MOUSE	no	11826	Aqp1	0.9962	5	1	6	0	#N/A
Mouse	Q02789	2 - putative	Voltage-dependent L-type calcium channel subunit alpha-1S	CAC1S_MOUSE	no	12292	Cacna1s	0.9959	1	1	21	0	#N/A
Mouse	Q0P5V9	2 - putative	Solute carrier family 45 member 4	S45A4_MOUSE	no	106068	Slc45a4	0.9959	5	1	12	0	#N/A
Mouse	Q8BXA5	2 - putative	Cleft lip and palate transmembrane protein 1-like protein	CLP1L_MOUSE	no	218335	Clptm1l	0.9959	8	1	6	0	#N/A
Mouse	Q9JLZ8	2 - putative	Single Ig IL-1-related receptor	SIGIR_MOUSE	no	24058	Sigirr	0.9958	6	1	1	0	#N/A
Mouse	Q3UF25	2 - putative	Transmembrane protein 110	TM110_MOUSE	no	69179	Tmem110	0.9956	5	1	5	0	#N/A
Mouse	Q8BHN0	2 - putative	Protein phosphatase 1L	PPM1L_MOUSE	no	242083	Ppm1l	0.9956	14	1	1	0	#N/A
Mouse	Q8VEC4	2 - putative	Calcium homeostasis modulator protein 2	CAHM2_MOUSE	no	72691	Calhm2	0.9956	3	1	4	0	#N/A
Mouse	Q8VHW3	2 - putative	Voltage-dependent calcium channel gamma-6 subunit	CCG6_MOUSE	no	54378	Cacng6	0.995	1	1	4	0	#N/A
Mouse	P51576	2 - putative	P2X purinoceptor 1	P2RX1_MOUSE	no	18436	P2rx1	0.9946	2	1	2	0	#N/A
Mouse	Q80WR1	2 - putative	Tetraspanin-18	TSN18_MOUSE	no	241556	Tspan18	0.9946	1	1	4	0	#N/A
Mouse	Q8C9E8	2 - putative	Protein FAM26F	FA26F_MOUSE	no	215900	Fam26f	0.9946	1	1	3	0	#N/A
Mouse	P18581	2 - putative	Low affinity cationic amino acid transporter 2	CTR2_MOUSE	no	11988	Slc7a2	0.9945	1	1	14	0	#N/A
Mouse	Q5DU41	2 - putative	Leucine-rich repeat-containing protein 8B	LRC8B_MOUSE	no	433926	Lrrc8b	0.9945	15	1	4	0	#N/A
Mouse	Q60754	2 - putative	Macrophage receptor MARCO	MARCO_MOUSE	no	17167	Marco	0.9945	1	1	1	0	#N/A
Mouse	Q8BH18	2 - putative	Transmembrane protein 117	TM117_MOUSE	no	320709	Tmem117	0.9945	1	1	8	0	#N/A
Mouse	Q8CIV2	2 - putative	Membralin	MBRL_MOUSE	no	216157	ORF61	0.9945	3	1	5	0	#N/A
Mouse	Q8K449	2 - putative	ATP-binding cassette sub-family A member 9	ABCA9_MOUSE	no	217262	Abca9	0.9945	1	1	14	0	#N/A
Mouse	Q91VA1	2 - putative	Choline transporter-like protein 4	CTL4_MOUSE	no	70129	Slc44a4	0.9945	4	1	10	0	#N/A
Mouse	Q9QZ15	2 - putative	C-type lectin domain family 4 member A	CLC4A_MOUSE	no	26888	Clec4a	0.9945	2	1	1	0	#N/A
Mouse	Q9Z218	2 - putative	Dipeptidyl aminopeptidase-like protein 6	DPP6_MOUSE	no	13483	Dpp6	0.9945	9	1	1	0	#N/A
Mouse	Q9CQD8	2 - putative	V-type proton ATPase subunit e 1	VA0E1_MOUSE	no	11974	Atp6v0e1	0.9942	3	1	2	0	#N/A
Mouse	P62956	2 - putative	Voltage-dependent calcium channel gamma-7 subunit	CCG7_MOUSE	no	81904	Cacng7	0.994	3	1	3	0	#N/A
Mouse	A2AJQ3	2 - putative	Protein dpy-19 homolog 4	D19L4_MOUSE	no	381510	Dpy19l4	0.9938	4	1	12	0	#N/A
Mouse	O70401	2 - putative	Tetraspanin-6	TSN6_MOUSE	no	56496	Tspan6	0.9938	22	1	4	0	#N/A
Mouse	P31651	2 - putative	Sodium- and chloride-dependent betaine transporter	S6A12_MOUSE	no	14411	Slc6a12	0.9938	1	1	12	0	#N/A
Mouse	Q09143	2 - putative	High affinity cationic amino acid transporter 1	CTR1_MOUSE	no	11987	Slc7a1	0.9938	18	1	14	0	#N/A
Mouse	Q3UHK1	2 - putative	Proton myo-inositol cotransporter	MYCT_MOUSE	no	239606	Slc2a13	0.9938	7	1	12	0	#N/A
Mouse	Q8VCA5	2 - putative	Transmembrane protease serine 4	TMPS4_MOUSE	no	214523	Tmprss4	0.9938	1	1	1	0	#N/A
Mouse	Q9D8C2	2 - putative	Tetraspanin-13	TSN13_MOUSE	no	66109	Tspan13	0.9938	22	1	4	0	#N/A
Mouse	Q9DAX2	2 - putative	Lipid phosphate phosphohydrolase 2	LPP2_MOUSE	no	50784	Ppap2c	0.9938	4	1	6	0	#N/A
Mouse	Q9JL99	2 - putative	C-type lectin domain family 1 member B	CLC1B_MOUSE	no	56760	Clec1b	0.993	1	1	1	0	#N/A
Mouse	Q5U4D8	2 - putative	Sodium-dependent multivitamin transporter	SC5A6_MOUSE	no	330064	Slc5a6	0.9928	2	1	13	0	#N/A
Mouse	Q8BZF2	2 - putative	Magnesium transporter NIPA4	NIPA4_MOUSE	no	214112	Nipal4	0.9928	1	1	9	0	#N/A
Mouse	Q8VBZ3	2 - putative	Cleft lip and palate transmembrane protein 1 homolog	CLPT1_MOUSE	no	56457	Clptm1	0.9928	11	1	5	0	#N/A
Mouse	O35219	2 - putative	Potassium voltage-gated channel subfamily H member 2	KCNH2_MOUSE	no	16511	Kcnh2	0.9922	2	1	5	0	#N/A
Mouse	O88662	2 - putative	Epithelial membrane protein 2	EMP2_MOUSE	no	13731	Emp2	0.9914	4	1	3	0	#N/A
Mouse	P49300	2 - putative	Macrophage asialoglycoprotein-binding protein 1	MMGL_MOUSE	no	17312	Mgl1	0.9912	4	1	1	0	#N/A
Mouse	Q8BG07	2 - putative	Phospholipase D4	PLD4_MOUSE	no	104759	Pld4	0.9909	3	1	1	0	#N/A
Mouse	Q9R1X5	2 - putative	Multidrug resistance-associated protein 5	MRP5_MOUSE	no	27416	Abcc5	0.9906	1	1	12	0	#N/A
Mouse	Q8C561	2 - putative	LMBR1 domain-containing protein 2	LMBD2_MOUSE	no	320506	Lmbrd2	0.9902	1	1	10	0	#N/A
Mouse	Q8CIP5	2 - putative	Protein dispatched homolog 2	DISP2_MOUSE	no	214240	Disp2	0.9898	1	1	13	0	#N/A
Mouse	Q8BJU2	2 - putative	Tetraspanin-9	TSN9_MOUSE	no	109246	Tspan9	0.9892	11	1	4	0	#N/A
Mouse	Q91VU1	2 - putative	Protein YIPF1	YIPF1_MOUSE	no	230584	Yipf1	0.9876	1	1	5	0	#N/A
Mouse	Q8C170	2 - putative	Myosin-IXa	MYO9A_MOUSE	no	270163	Myo9a	0.9868	21	1	1	0	#N/A
Mouse	Q01341	2 - putative	Adenylate cyclase type 6	ADCY6_MOUSE	no	11512	Adcy6	0.9867	5	1	12	0	#N/A
Mouse	Q8R1C0	2 - putative	Potassium voltage-gated channel subfamily C member 4	KCNC4_MOUSE	no	99738	Kcnc4	0.9862	1	1	7	0	#N/A
Mouse	Q9EQJ0	2 - putative	Two pore calcium channel protein 1	TPC1_MOUSE	no	252972	Tpcn1	0.9859	11	1	11	0	#N/A
Mouse	Q62205	2 - putative	Sodium channel protein type 9 subunit alpha	SCN9A_MOUSE	no	20274	Scn9a	0.9833	3	1	24	0	#N/A
Mouse	P55088	2 - putative	Aquaporin-4	AQP4_MOUSE	no	11829	Aqp4	0.9421	1	1	6	0	#N/A
Mouse	Q8K595	2 - putative	Mucolipin-2	MCLN2_MOUSE	no	68279	Mcoln2	0.9393	1	1	6	0	#N/A
Mouse	Q9WUB7	2 - putative	Chloride channel protein ClC-Ka	CLCKA_MOUSE	no	12733	Clcnka	0.9302	2	1	11	0	#N/A
Mouse	O09117	2 - putative	Synaptophysin-like protein 1	SYPL1_MOUSE	no	19027	Sypl1	1	30	1	3	0	#N/A
Mouse	O35114	2 - putative	Lysosome membrane protein 2	SCRB2_MOUSE	no	12492	Scarb2	1	29	1	1	0	#N/A
Mouse	O35405	2 - putative	Phospholipase D3	PLD3_MOUSE	no	18807	Pld3	1	6	1	1	0	#N/A
Mouse	O35454	2 - putative	Chloride transport protein 6	CLCN6_MOUSE	no	26372	Clcn6	1	7	1	10	0	#N/A
Mouse	P27046	2 - putative	Alpha-mannosidase 2	MA2A1_MOUSE	no	17158	Man2a1	1	7	1	1	0	#N/A
Mouse	P39098	2 - putative	Mannosyl-oligosaccharide 1,2-alpha-mannosidase IB	MA1A2_MOUSE	no	17156	Man1a2	1	12	1	1	0	#N/A
Mouse	P46978	2 - putative	Dolichyl-diphosphooligosaccharide--protein glycosyltransferase subunit STT3A	STT3A_MOUSE	no	16430	Stt3a	1	23	1	13	0	#N/A
Mouse	P57757	2 - putative	Cystinosin	CTNS_MOUSE	no	83429	Ctns	1	16	1	7	0	#N/A
Mouse	Q3TDQ1	2 - putative	Dolichyl-diphosphooligosaccharide--protein glycosyltransferase subunit STT3B	STT3B_MOUSE	no	68292	Stt3b	1	25	1	13	0	#N/A
Mouse	Q3TVI8	2 - putative	Pre-B-cell leukemia transcription factor-interacting protein 1	PBIP1_MOUSE	no	229534	Pbxip1	1	5	1	1	0	#N/A
Mouse	Q3UDW8	2 - putative	Heparan-alpha-glucosaminide N-acetyltransferase	HGNAT_MOUSE	no	52120	Hgsnat	1	11	1	12	0	#N/A
Mouse	Q3UUQ7	2 - putative	GPI inositol-deacylase	PGAP1_MOUSE	no	241062	Pgap1	1	16	1	9	0	#N/A
Mouse	Q3UVK0	2 - putative	Endoplasmic reticulum metallopeptidase 1	ERMP1_MOUSE	no	226090	Ermp1	1	5	1	10	0	#N/A
Mouse	Q64687	2 - putative	Alpha-N-acetylneuraminide alpha-2,8-sialyltransferase	SIA8A_MOUSE	no	20449	St8sia1	1	8	1	1	0	#N/A
Mouse	Q69ZN6	2 - putative	N-acetylglucosamine-1-phosphotransferase subunits alpha/beta	GNPTA_MOUSE	no	432486	Gnptab	1	13	1	2	0	#N/A
Mouse	Q7TT15	2 - putative	Putative polypeptide N-acetylgalactosaminyltransferase-like protein 3	GLTL3_MOUSE	no	212996	Wbscr17	1	6	1	1	0	#N/A
Mouse	Q80VP8	2 - putative	Transmembrane protein 106C	T106C_MOUSE	no	380967	Tmem106c	1	4	1	1	0	#N/A
Mouse	Q80WV3	2 - putative	Carbohydrate sulfotransferase 2	CHST2_MOUSE	no	54371	Chst2	1	2	1	1	0	#N/A
Mouse	Q80Z60	2 - putative	Endothelin-converting enzyme 2	ECE2_MOUSE	no	107522	Ece2	1	4	1	1	0	#N/A
Mouse	Q8BGQ4	2 - putative	Protein O-mannosyl-transferase 2	POMT2_MOUSE	no	217734	Pomt2	1	8	1	11	0	#N/A
Mouse	Q8BHJ6	2 - putative	Serine incorporator 5	SERC5_MOUSE	no	218442	Serinc5	1	10	1	10	0	#N/A
Mouse	Q8BYU6	2 - putative	Torsin-1A-interacting protein 2	TOIP2_MOUSE	no	240832	Tor1aip2	1	6	1	1	0	#N/A
Mouse	Q8BZ00	2 - putative	Sodium/hydrogen exchanger 9	SL9A9_MOUSE	no	331004	SLC9a9	1	1	1	12	0	#N/A
Mouse	Q8C3X8	2 - putative	Lipase maturation factor 2	LMF2_MOUSE	no	105847	Lmf2	1	6	1	10	0	#N/A
Mouse	Q8K0B2	2 - putative	Probable lysosomal cobalamin transporter	LMBD1_MOUSE	no	68421	Lmbrd1	1	9	1	9	0	#N/A
Mouse	Q920V1	2 - putative	UDP-GalNAc:beta-1,3-N-acetylgalactosaminyltransferase 1	B3GL1_MOUSE	no	26879	B3galnt1	1	6	1	1	0	#N/A
Mouse	Q99JY8	2 - putative	Lipid phosphate phosphohydrolase 3	LPP3_MOUSE	no	67916	Ppap2b	1	6	1	5	0	#N/A
Mouse	Q9WTN6	2 - putative	Solute carrier family 22 member 21	S22AL_MOUSE	no	56517	Slc22a21	1	14	1	11	0	#N/A
Mouse	Q9Z222	2 - putative	UDP-GlcNAc:betaGal beta-1,3-N-acetylglucosaminyltransferase 2	B3GN2_MOUSE	no	53625	B3gnt2	1	10	1	1	0	#N/A
Mouse	Q6PIX5	2 - putative	Rhomboid family member 1	RHDF1_MOUSE	no	13650	Rhbdf1	0.9999	3	1	7	0	#N/A
Mouse	Q64518	2 - putative	Sarcoplasmic/endoplasmic reticulum calcium ATPase 3	AT2A3_MOUSE	no	53313	Atp2a3	0.9993	1	1	8	0	#N/A
Mouse	Q6PD26	2 - putative	GPI transamidase component PIG-S	PIGS_MOUSE	no	276846	Pigs	0.9979	17	1	2	0	#N/A
Mouse	Q8BJS4	2 - putative	Protein unc-84 homolog B	UN84B_MOUSE	no	223697	Unc84b	0.9979	10	1	1	0	#N/A
Mouse	Q8K2W3	2 - putative	Thioredoxin domain-containing protein 11	TXD11_MOUSE	no	106200	Txndc11	0.9979	5	1	1	0	#N/A
Mouse	Q9R1S3	2 - putative	GPI ethanolamine phosphate transferase 1	PIGN_MOUSE	no	27392	Pign	0.9979	4	1	15	0	#N/A
Mouse	Q9Z1M7	2 - putative	Glycosyltransferase-like protein LARGE1	LARGE_MOUSE	no	16795	Large	0.9979	6	1	1	0	#N/A
Mouse	Q9Z2E9	2 - putative	Seipin	BSCL2_MOUSE	no	14705	Bscl2	0.9979	7	1	3	0	#N/A
Mouse	Q64689	2 - putative	Sia-alpha-2,3-Gal-beta-1,4-GlcNAc-R:alpha 2,8-sialyltransferase	SIA8C_MOUSE	no	20451	St8sia3	0.9973	1	1	1	0	#N/A
Mouse	Q765H6	2 - putative	Alpha-1,6-mannosylglycoprotein 6-beta-N-acetylglucosaminyltransferase B	MGT5B_MOUSE	no	268510	Mgat5b	0.9973	2	1	1	0	#N/A
Mouse	Q01237	2 - putative	3-hydroxy-3-methylglutaryl-coenzyme A reductase	HMDH_MOUSE	no	15357	Hmgcr	0.9972	4	1	8	0	#N/A
Mouse	Q3TCT4	2 - putative	Ectonucleoside triphosphate diphosphohydrolase 7	ENTP7_MOUSE	no	93685	Entpd7	0.9966	8	1	2	0	#N/A
Mouse	Q68FE2	2 - putative	Autophagy-related protein 9A	ATG9A_MOUSE	no	245860	Atg9a	0.9966	16	1	4	0	#N/A
Mouse	Q8BH31	2 - putative	Major facilitator superfamily domain-containing protein 8	MFSD8_MOUSE	no	72175	Mfsd8	0.9966	9	1	12	0	#N/A
Mouse	Q8BUB6	2 - putative	Uronyl 2-sulfotransferase	UST_MOUSE	no	338362	Ust	0.9966	6	1	1	0	#N/A
Mouse	Q9JJI6	2 - putative	GPI ethanolamine phosphate transferase 3	PIGO_MOUSE	no	56703	Pigo	0.9965	1	1	15	0	#N/A
Mouse	Q9DBZ1	2 - putative	Inhibitor of nuclear factor kappa-B kinase-interacting protein	IKIP_MOUSE	no	67454	Ikip	0.996	2	1	1	0	#N/A
Mouse	Q9WVL6	2 - putative	Exostosin-like 3	EXTL3_MOUSE	no	54616	Extl3	0.996	8	1	1	0	#N/A
Mouse	Q8VCF1	2 - putative	Soluble calcium-activated nucleotidase 1	CANT1_MOUSE	no	76025	Cant1	0.9959	10	1	1	0	#N/A
Mouse	Q80WQ6	2 - putative	Rhomboid family member 2	RHDF2_MOUSE	no	217344	Rhbdf2	0.9949	12	1	7	0	#N/A
Mouse	P11881	2 - putative	Inositol 1,4,5-trisphosphate receptor type 1	ITPR1_MOUSE	no	16438	Itpr1	0.9945	1	1	7	0	#N/A
Mouse	Q640M6	2 - putative	Glycerophosphodiester phosphodiesterase domain-containing protein 5	GDPD5_MOUSE	no	233552	Gdpd5	0.9945	7	1	6	0	#N/A
Mouse	Q8BLV3	2 - putative	Sodium/hydrogen exchanger 7	SL9A7_MOUSE	no	236727	Slc9a7	0.9945	5	1	12	0	#N/A
Mouse	Q99J59	2 - putative	Tetraspanin-1	TSN1_MOUSE	no	66805	Tspan1	0.9938	1	1	4	0	#N/A
Mouse	Q6GQT6	2 - putative	Sterol regulatory element-binding protein cleavage-activating protein	SCAP_MOUSE	no	235623	Scap	0.9935	4	1	7	0	#N/A
Mouse	Q80UM7	2 - putative	Mannosyl-oligosaccharide glucosidase	MOGS_MOUSE	no	57377	Mogs	0.9932	1	1	1	0	#N/A
Mouse	Q8K1B9	2 - putative	Putative polypeptide N-acetylgalactosaminyltransferase-like protein 4	GLTL4_MOUSE	no	233733	Galntl4	0.9932	2	1	1	0	#N/A
Mouse	Q8BRU6	2 - putative	Synaptic vesicular amine transporter	VMAT2_MOUSE	no	214084	Slc18a2	0.9928	1	1	12	0	#N/A
Mouse	Q7TN60	2 - putative	Transmembrane channel-like protein 6	TMC6_MOUSE	no	217353	Tmc6	0.99	1	1	11	0	#N/A
Mouse	Q99LL3	2 - putative	Carbohydrate sulfotransferase 12	CHSTC_MOUSE	no	59031	Chst12	0.9822	4	1	1	0	#N/A
Mouse	Q8R4G6	2 - putative	Alpha-1,6-mannosylglycoprotein 6-beta-N-acetylglucosaminyltransferase A	MGT5A_MOUSE	no	107895	Mgat5	0.9779	5	1	1	0	#N/A
Mouse	Q9EQC4	2 - putative	Elongation of very long chain fatty acids protein 4	ELOV4_MOUSE	no	83603	Elovl4	0.9578	5	1	7	0	#N/A
Mouse	O54905	2 - putative	Beta-1,3-galactosyltransferase 2	B3GT2_MOUSE	no	26878	B3galt2	0.9023	2	1	1	0	#N/A
Mouse	O88829	2 - putative	Lactosylceramide alpha-2,3-sialyltransferase	SIAT9_MOUSE	no	20454	St3gal5	0.8933	1	1	1	0	#N/A
Mouse	Q61029	2 - putative	Lamina-associated polypeptide 2, isoforms beta/delta/epsilon/gamma	LAP2B_MOUSE	no	21917	Tmpo	1	8	1	1	0	#N/A
Mouse	Q7TPV4	2 - putative	Myb-binding protein 1A	MBB1A_MOUSE	no	18432	Mybbp1a	1	5	1	1	0	#N/A
Mouse	Q8VHK9	2 - putative	Probable ATP-dependent RNA helicase DHX36	DHX36_MOUSE	no	72162	Dhx36	1	6	1	1	0	#N/A
Mouse	Q8K0L3	2 - putative	Acyl-coenzyme A synthetase ACSM2, mitochondrial	ACSM2_MOUSE	no	233799	Acsm2	0.9929	2	1	3	0	#N/A
Mouse	Q9D666	2 - putative	Protein unc-84 homolog A	UN84A_MOUSE	no	77053	Unc84a	0.9924	10	1	3	0	#N/A
Mouse	Q8K224	2 - putative	N-acetyltransferase 10	NAT10_MOUSE	no	98956	Nat10	0.9912	1	1	1	0	#N/A
Mouse	Q921T2	2 - putative	Torsin-1A-interacting protein 1	TOIP1_MOUSE	no	208263	Tor1aip1	0.9736	15	1	1	0	#N/A
Mouse	Q80YY7	2 - putative	Zinc finger protein 618	ZN618_MOUSE	no	272031	Znf618	0.9268	3	1	1	0	#N/A

## Sheet: Table_C
Organisme	ID link	CD	Native Sequence	peptide with modification	extended peptide sequence	Peptide probability	pep/prot count	# tryptic termini	# NXST motiv	# N[115] sites
Human	A1A5B4	no	DFQDPDGIEGSENVTLCR	DFQDPDGIEGSEN[115]VTLCR	K.DFQDPDGIEGSENVTLCR.Y	1	2	2	1	1
Human	A1A5B4	no	EGNSTVDCLK	EGN[115]STVDCLK	K.EGNSTVDCLK.G	1	2	2	1	1
Human	A1A5C7	no	SNSSGADGGDTPPLPSPPDK	SN[115]SSGADGGDTPPLPSPPDK	R.SNSSGADGGDTPPLPSPPDK.G	1	3	2	1	1
Human	A1A5C7	no	SNSSGADGGDTPPLPSPPDKGDNASNCDCR	SN[115]SSGADGGDTPPLPSPPDKGDN[115]ASNCDCR	R.SNSSGADGGDTPPLPSPPDKGDNASNCDCR.A	1	3	2	2	2
Human	A1A5C7	no	SNSSGADGGDTPPLPSPPDKGDNASNCDCR	SNSSGADGGDTPPLPSPPDKGDN[115]ASN[115]CDCR	R.SNSSGADGGDTPPLPSPPDKGDNASNCDCR.A	1	3	2	1	2
Human	A2BFH1	no	AGPNTNGSQFFICTAK	AGPNTN[115]GSQFFICTAK	N.AGPNTNGSQFFICTAK.T	1	1	1	1	1
Human	A2RU67	no	APDSNCSNLLITTR	APDSN[115]CSNLLITTR	K.APDSNCSNLLITTR.Q	1	2	2	1	1
Human	A2RU67	no	YLSNGTLAAPVVVLPDLDEDGVR	YLSN[115]GTLAAPVVVLPDLDEDGVR	N.YLSNGTLAAPVVVLPDLDEDGVR.D	1	2	1	1	1
Human	A2VDJ0	no	DALSLQFEPVLLPTSTTNFTK	DALSLQFEPVLLPTSTTN[115]FTK	R.DALSLQFEPVLLPTSTTNFTK.I	1	2	2	1	1
Human	A2VDJ0	no	NNLTVIDMIGVEGFGAR	NN[115]LTVIDMIGVEGFGAR	R.NNLTVIDMIGVEGFGAR.E	1	2	2	1	1
Human	A6NGN9	no	HYGNYTCR	HYGN[115]YTCR	R.HYGNYTCR.A	1	2	2	1	1
Human	A6NGN9	no	SMLLFANVSAR	SMLLFAN[115]VSAR	R.SMLLFANVSAR.H	1	2	2	1	1
Human	A6NGU5	no	AVEEPRLHNKLLPNVTTVER	AVEEPRLHNKLLPN[115]VTTVER	R.AVEEPRLHNKLLPNVTTVER.N	1	8	2	1	1
Human	A6NGU5	no	FNSSEQSQK	FN[115]SSEQSQK	M.FNSSEQSQK.G	0.99	8	1	1	1
Human	A6NGU5	no	LAFASMFNSSEQSQK	LAFASMFN[115]SSEQSQK	R.LAFASMFNSSEQSQK.G	1	8	2	1	1
Human	A6NGU5	no	LHNKLLPNVTTVER	LHN[115]KLLPN[115]VTTVER	R.LHNKLLPNVTTVER.N	1	8	2	1	2
Human	A6NGU5	no	LHNKLLPNVTTVER	LHNKLLPN[115]VTTVER	R.LHNKLLPNVTTVER.N	1	8	2	1	1
Human	A6NGU5	no	MFNSSEQSQK	MFN[115]SSEQSQK	T.MFNSSEQSQK.G	1	8	1	1	1
Human	A6NGU5	no	NMTSEFFAAQLR	N[115]MTSEFFAAQLR	R.NMTSEFFAAQLR.A	1	8	2	1	1
Human	A6NGU5	no	PNVTTVER	PN[115]VTTVER	L.PNVTTVER.N	1	8	1	1	1
Human	A6NI73	CD85f	SGAADNLSPSQNK	SGAADN[115]LSPSQN[115]K	V.SGAADNLSPSQNK.S	1	2	1	1	2
Human	A6NI73	CD85f	SGAADNLSPSQNK	SGAADNLSPSQN[115]K	V.SGAADNLSPSQNK.S	1	2	1	1	1
Human	A6NKC4	no	ITSASVNDSGEYR	ITSASVN[115]DSGEYR	R.ITSASVNDSGEYR.C	1	3	2	1	1
Human	A6NKC4	no	SVNDSGEYR	SVN[115]DSGEYR	A.SVNDSGEYR.C	1	3	1	1	1
Human	A6NKC4	no	TSASVNDSGEYR	TSASVN[115]DSGEYR	I.TSASVNDSGEYR.C	1	3	1	1	1
Human	A6NKL6	no	APGGVNSSSAGAPR	APGGVN[115]SSSAGAPR	R.APGGVNSSSAGAPR.S	1	2	2	1	1
Human	A6NKL6	no	PGGVNSSSAGAPR	PGGVN[115]SSSAGAPR	A.PGGVNSSSAGAPR.S	1	2	1	1	1
Human	A6NMZ7	no	EANQTQLR	EAN[115]QTQLR	K.EANQTQLR.E	0.98	4	2	1	1
Human	A6NMZ7	no	TFADLAAHNQTFLK	TFADLAAHN[115]QTFLK	K.TFADLAAHNQTFLK.K	1	4	2	1	1
Human	A6NMZ7	no	VGLVAYSNETK	VGLVAYSN[115]ETK	R.VGLVAYSNETK.V	1	4	2	1	1
Human	A6NMZ7	no	VINSLSMGINK	VINSLSMGIN[115]K	K.VINSLSMGINK.S	0.99	4	2	1	1
Human	A7MBM2	no	LATPWGLADNYTSVTGMDLGLK	LATPWGLADN[115]YTSVTGMDLGLK	R.LATPWGLADNYTSVTGMDLGLK.Q	1	7	2	1	1
Human	A7MBM2	no	LLFLSPDLELNSSSSHNTLRPAP	LLFLSPDLELN[115]SSSSHNTLRPAP	K.LLFLSPDLELNSSSSHNTLRPAP.R	0.99	7	1	1	1
Human	A7MBM2	no	LLFLSPDLELNSSSSHNTLRPAP	LLFLSPDLELNSSSSHN[115]TLRPAP	K.LLFLSPDLELNSSSSHNTLRPAP.R	0.99	7	1	0	1
Human	A7MBM2	no	LLFLSPDLELNSSSSHNTLRPAPR	LLFLSPDLELN[115]SSSSHNTLRPAPR	K.LLFLSPDLELNSSSSHNTLRPAPR.G	0.98	7	2	1	1
Human	A7MBM2	no	LSPDLELNSSSSHNTLRPAPR	LSPDLELN[115]SSSSHNTLRPAPR	F.LSPDLELNSSSSHNTLRPAPR.G	0.98	7	1	1	1
Human	A7MBM2	no	SNSSLVRDPAFSASGPEAQR	SN[115]SSLVRDPAFSASGPEAQR	R.SNSSLVRDPAFSASGPEAQR.W	1	7	2	1	1
Human	A7MBM2	no	YLAVLSNR	YLAVLSN[115]R	N.YLAVLSNR.S	0.95	7	1	1	1
Human	A8MVW0	no	ASVDVFGNR	ASVDVFGN[115]R	R.ASVDVFGNR.T	1	1	2	1	1
Human	A8MVW5	no	VNIQGNGTLSASQK	VNIQGN[115]GTLSASQK	K.VNIQGNGTLSASQK.I	1	1	2	1	1
Human	A8MWY0	no	MALCTNNITDFTVK	MALCTNN[115]ITDFTVK	K.MALCTNNITDFTVK.E	1	1	2	1	1
Human	A8MYG8	no	LDGENGTPLMK	LDGEN[115]GTPLMK	V.LDGENGTPLMK.A	0.99	1	1	1	1
Human	A8TX70	no	TQIQNVSK	TQIQN[115]VSK	K.TQIQNVSK.S	1	1	2	1	1
Human	O00116	no	TNISYSQEADDR	TN[115]ISYSQEADDR	E.TNISYSQEADDR.V	1	1	1	1	1
Human	O00206	CD284	LPEYFSNLTNLEHLDLSSNK	LPEYFSN[115]LTNLEHLDLSSNK	K.LPEYFSNLTNLEHLDLSSNK.I	1	2	2	1	1
Human	O00206	CD284	SALEGLCNLTIEEFR	SALEGLCN[115]LTIEEFR	K.SALEGLCNLTIEEFR.L	1	2	2	1	1
Human	O00241	CD172b	GLQLTWLENGNVSR	GLQLTWLENGN[115]VSR	R.GLQLTWLENGNVSR.T	1	9	2	1	1
Human	O00241	CD172b	GLQLTWLENGNVSR	GLQLTWLEN[115]GN[115]VSR	R.GLQLTWLENGNVSR.T	1	9	2	1	2
Human	O00241	CD172b	GTANLSEAIR	GTAN[115]LSEAIR	R.GTANLSEAIR.V	1	9	2	1	1
Human	O00241	CD172b	LENGNVSR	LEN[115]GN[115]VSR	W.LENGNVSR.T	0.94	9	1	1	2
Human	O00241	CD172b	LQLTWLENGNVSR	LQLTWLENGN[115]VSR	R.LQLTWLENGNVSR.T	1	9	2	1	1
Human	O00241	CD172b	LQLTWLENGNVSR	LQLTWLEN[115]GN[115]VSR	R.LQLTWLENGNVSR.T	1	9	2	1	2
Human	O00241	CD172b	QLTWLENGNVSR	QLTWLEN[115]GN[115]VSR	L.QLTWLENGNVSR.T	1	9	1	1	2
Human	O00241	CD172b	QLTWLENGNVSR	QLTWLENGN[115]VSR	L.QLTWLENGNVSR.T	1	9	1	1	1
Human	O00241	CD172b	WLENGNVSR	WLEN[115]GN[115]VSR	T.WLENGNVSR.T	0.9	9	1	1	2
Human	O00300	no	HIGHANLTFEQLR	HIGHAN[115]LTFEQLR	R.HIGHANLTFEQLR.S	1	1	2	1	1
Human	O00391	no	NSTLDPGKPEMMK	N[115]STLDPGKPEMMK	R.NSTLDPGKPEMMK.S	1	1	2	1	1
Human	O00398	no	MGSNSTSTAEIYCNVTNVK	MGSN[115]STSTAEIYCN[115]VTNVK	K.MGSNSTSTAEIYCNVTNVK.F	1	1	2	2	2
Human	O00451	no	AIQAFGNGTDVNVSPK	AIQAFGN[115]GTDVN[115]VSPK	N.AIQAFGNGTDVNVSPK.G	1	8	1	2	2
Human	O00451	no	AIQAFGNGTDVNVSPK	AIQAFGN[115]GTDVNVSPK	N.AIQAFGNGTDVNVSPK.G	1	8	1	1	1
Human	O00451	no	ANELCAAESNCSSR	AN[115]ELCAAESN[115]CSSR	R.ANELCAAESNCSSR.Y	1	8	2	1	2
Human	O00451	no	ANELCAAESNCSSR	ANELCAAESN[115]CSSR	R.ANELCAAESNCSSR.Y	1	8	2	1	1
Human	O00451	no	NAIQAFGNGTDVNVSPK	N[115]AIQAFGN[115]GTDVN[115]VSPK	R.NAIQAFGNGTDVNVSPK.G	1	8	2	2	3
Human	O00451	no	NAIQAFGNGTDVNVSPK	NAIQAFGN[115]GTDVN[115]VSPK	R.NAIQAFGNGTDVNVSPK.G	1	8	2	2	2
Human	O00451	no	NAIQAFGNGTDVNVSPK	N[115]AIQAFGN[115]GTDVNVSPK	R.NAIQAFGNGTDVNVSPK.G	1	8	2	1	2
Human	O00451	no	NAIQAFGNGTDVNVSPK	NAIQAFGN[115]GTDVNVSPK	R.NAIQAFGNGTDVNVSPK.G	1	8	2	1	1
Human	O00461	no	DPAEQQNVTQVAHSPQGYNTAR	DPAEQQN[115]VTQVAHSPQGYNTAR	P.DPAEQQNVTQVAHSPQGYNTAR.E	1	6	1	1	1
Human	O00461	no	KPDPAEQQNVTQVAH	KPDPAEQQN[115]VTQVAH	R.KPDPAEQQNVTQVAH.S	1	6	1	1	1
Human	O00461	no	KPDPAEQQNVTQVAHSPQGY	KPDPAEQQN[115]VTQVAHSPQGY	R.KPDPAEQQNVTQVAHSPQGY.N	1	6	1	1	1
Human	O00461	no	KPDPAEQQNVTQVAHSPQGYNTAR	KPDPAEQQN[115]VTQVAHSPQGYNTAR	R.KPDPAEQQNVTQVAHSPQGYNTAR.E	1	6	2	1	1
Human	O00461	no	PAEQQNVTQVAHSPQGYNTAR	PAEQQN[115]VTQVAHSPQGYNTAR	D.PAEQQNVTQVAHSPQGYNTAR.E	1	6	1	1	1
Human	O00461	no	PDPAEQQNVTQVAHSPQGYNTAR	PDPAEQQN[115]VTQVAHSPQGYNTAR	K.PDPAEQQNVTQVAHSPQGYNTAR.E	1	6	2	1	1
Human	O00468	no	CVEESGSAHCVCPMLTCPEANATK	CVEESGSAHCVCPMLTCPEAN[115]ATK	R.CVEESGSAHCVCPMLTCPEANATK.V	1	3	2	1	1
Human	O00468	no	GCCQDNITAAR	GCCQDN[115]ITAAR	Y.GCCQDNITAAR.G	1	3	1	1	1
Human	O00468	no	NELMLNSSLMR	NELMLN[115]SSLMR	K.NELMLNSSLMR.I	1	3	2	1	1
Human	O00469	no	EAINITLDHK	EAIN[115]ITLDHK	R.EAINITLDHK.C	1	7	2	1	1
Human	O00469	no	IVGPEENLSQAEAR	IVGPEEN[115]LSQAEAR	K.IVGPEENLSQAEAR.N	1	7	2	1	1
Human	O00469	no	LLSTANYNTSH	LLSTANYN[115]TSH	R.LLSTANYNTSH.Y	1	7	1	1	1
Human	O00469	no	LLSTANYNTSHYN	LLSTANYN[115]TSHYN	R.LLSTANYNTSHYN.N	1	7	1	1	1
Human	O00469	no	LTHLHEGLPVKNGTR	LTHLHEGLPVKN[115]GTR	R.LTHLHEGLPVKNGTR.Y	1	7	2	1	1
Human	O00469	no	YFNYTVK	YFN[115]YTVK	K.YFNYTVK.V	1	7	2	1	1
Human	O00469	no	YNCSIESPR	YN[115]CSIESPR	R.YNCSIESPR.K	1	7	2	1	1
Human	O00478	no	HNVTASDSGK	HN[115]VTASDSGK	I.HNVTASDSGK.Y	1	2	1	1	1
Human	O00478	no	IHNVTASDSGK	IHN[115]VTASDSGK	R.IHNVTASDSGK.Y	1	2	2	1	1
Human	O00533	no	DGEAFEINGTEDGR	DGEAFEIN[115]GTEDGR	K.DGEAFEINGTEDGR.I	1	12	2	1	1
Human	O00533	no	IIPSNNSGTFR	IIPSN[115]NSGTFR	R.IIPSNNSGTFR.I	0.99	12	2	1	1
Human	O00533	no	LSNLNATTK	LSNLN[115]ATTK	H.LSNLNATTK.Y	1	12	1	1	1
Human	O00533	no	LTWEAGADHNSNISEYIVEFEGNKEEPGR	LTWEAGADHNSN[115]ISEYIVEFEGNKEEPGR	R.LTWEAGADHNSNISEYIVEFEGNKEEPGR.W	1	12	2	1	1
Human	O00533	no	LTWEAGADHNSNISEYIVEFEGNKEEPGR	LTWEAGADHNSNISEYIVEFEGN[115]KEEPGR	R.LTWEAGADHNSNISEYIVEFEGNKEEPGR.W	1	12	2	0	1
Human	O00533	no	LTWEAGADHNSNISEYIVEFEGNKEEPGR	LTWEAGADHN[115]SNISEYIVEFEGNKEEPGR	R.LTWEAGADHNSNISEYIVEFEGNKEEPGR.W	1	12	2	0	1
Human	O00533	no	PQGAPVEWEEETVTNHTLR	PQGAPVEWEEETVTN[115]HTLR	K.PQGAPVEWEEETVTNHTLR.V	1	12	2	1	1
Human	O00533	no	PSNNSGTFR	PSN[115]NSGTFR	I.PSNNSGTFR.I	1	12	1	1	1
Human	O00533	no	PSWHLSNLNATTK	PSWHLSNLN[115]ATTK	K.PSWHLSNLNATTK.Y	1	12	2	1	1
Human	O00533	no	SGEDYPDTAPVIHGVDVINSTLVK	SGEDYPDTAPVIHGVDVIN[115]STLVK	Y.SGEDYPDTAPVIHGVDVINSTLVK.V	1	12	1	1	1
Human	O00533	no	VTWKPQGAPVEWEEETVTNHTLR	VTWKPQGAPVEWEEETVTN[115]HTLR	R.VTWKPQGAPVEWEEETVTNHTLR.V	1	12	2	1	1
Human	O00533	no	YHIYENGTLQINR	YHIYEN[115]GTLQIN[115]R	R.YHIYENGTLQINR.T	1	12	2	1	2
Human	O00567	no	IINDNATYCR	IINDN[115]ATYCR	K.IINDNATYCR.L	1	1	2	1	1
Human	O00587	no	PSLNRPIHASEPQPHNR	PSLNRPIHASEPQPHN[115]R	R.PSLNRPIHASEPQPHNR.T	1	1	2	1	1
Human	O00592	no	QLVLNLTGN	QLVLN[115]LTGN	K.QLVLNLTGN.T	1	3	1	1	1
Human	O00592	no	QLVLNLTGNTLCAGGASDEK	QLVLN[115]LTGNTLCAGGASDEK	K.QLVLNLTGNTLCAGGASDEK.L	1	3	2	1	1
Human	O00592	no	QLVLNLTGNTLCAGGASDEK	QLVLNLTGN[115]TLCAGGASDEK	K.QLVLNLTGNTLCAGGASDEK.L	1	3	2	0	1
Human	O00634	no	TCNQTTGQCPCK	TCN[115]QTTGQCPCK	K.TCNQTTGQCPCK.D	1	1	2	1	1
Human	O00754	no	LNQTEPVAGNYYPVNTR	LN[115]QTEPVAGNYYPVNTR	K.LNQTEPVAGNYYPVNTR.I	1	3	2	1	1
Human	O00754	no	NLSAPVTLNLR	N[115]LSAPVTLNLR	R.NLSAPVTLNLR.D	1	3	2	1	1
Human	O00754	no	WWHQQTNATQEVVR	WWHQQTN[115]ATQEVVR	R.WWHQQTNATQEVVR.D	1	3	2	1	1
Human	O14494	no	INCSDGYIEYYICR	IN[115]CSDGYIEYYICR	K.INCSDGYIEYYICR.G	1	1	2	1	1
Human	O14495	no	FLSVCNPDFSQINCSEGYIQNYR	FLSVCNPDFSQIN[115]CSEGYIQNYR	H.FLSVCNPDFSQINCSEGYIQNYR.C	1	1	1	1	1
Human	O14498	no	FQAFANGSLLIPDFGK	FQAFAN[115]GSLLIPDFGK	R.FQAFANGSLLIPDFGK.L	1	1	2	1	1
Human	O14524	no	LNDTYVNVGLYSTK	LN[115]DTYVNVGLYSTK	K.LNDTYVNVGLYSTK.T	1	1	2	1	1
Human	O14556	no	IVSNASCTTNCLAPLAK	IVSN[115]ASCTTNCLAPLAK	N.IVSNASCTTNCLAPLAK.V	1	1	1	1	1
Human	O14638	CD203c	NLSCRKPDQHFKPYLTPDLPK	N[115]LSCRKPDQHFKPYLTPDLPK	R.NLSCRKPDQHFKPYLTPDLPK.R	1	2	2	1	1
Human	O14638	CD203c	YNGSVPFEER	YN[115]GSVPFEER	M.YNGSVPFEER.I	1	2	1	1	1
Human	O14657	no	EERPLNASALK	EERPLN[115]ASALK	R.EERPLNASALK.L	1	1	2	1	1
Human	O14672	CD156c	EGICNGFTALCPASDPKPNFTDCNR	EGICNGFTALCPASDPKPN[115]FTDCN[115]R	R.EGICNGFTALCPASDPKPNFTDCNR.H	1	15	2	1	2
Human	O14672	CD156c	EGICNGFTALCPASDPKPNFTDCNR	EGICN[115]GFTALCPASDPKPN[115]FTDCNR	R.EGICNGFTALCPASDPKPNFTDCNR.H	1	15	2	1	2
Human	O14672	CD156c	EGICNGFTALCPASDPKPNFTDCNR	EGICNGFTALCPASDPKPN[115]FTDCNR	R.EGICNGFTALCPASDPKPNFTDCNR.H	1	15	2	1	1
Human	O14672	CD156c	EGICNGFTALCPASDPKPNFTDCNR	EGICN[115]GFTALCPASDPKPNFTDCN[115]R	R.EGICNGFTALCPASDPKPNFTDCNR.H	1	15	2	0	2
Human	O14672	CD156c	INTTADEK	IN[115]TTADEK	R.INTTADEK.D	1	15	2	1	1
Human	O14672	CD156c	INTTADEKDPTN	IN[115]TTADEKDPTN	R.INTTADEKDPTN.P	1	15	1	1	1
Human	O14672	CD156c	INTTADEKDPTNPF	IN[115]TTADEKDPTNPF	R.INTTADEKDPTNPF.R	1	15	1	1	1
Human	O14672	CD156c	INTTADEKDPTNPFR	IN[115]TTADEKDPTNPFR	R.INTTADEKDPTNPFR.F	1	15	2	1	1
Human	O14672	CD156c	INTTADEKDPTNPFR	INTTADEKDPTN[115]PFR	R.INTTADEKDPTNPFR.F	1	15	2	0	1
Human	O14672	CD156c	INTTADEKDPTNPFRFPNIGVEK	IN[115]TTADEKDPTNPFRFPNIGVEK	R.INTTADEKDPTNPFRFPNIGVEK.F	1	15	2	1	1
Human	O14672	CD156c	IRINTTADEKDPTNPFR	IRIN[115]TTADEKDPTNPFR	R.IRINTTADEKDPTNPFR.F	0.97	15	2	1	1
Human	O14672	CD156c	NISQVLEK	N[115]ISQVLEK	R.NISQVLEK.K	1	15	2	1	1
Human	O14672	CD156c	NTTADEKDPTNPFR	N[115]TTADEKDPTNPFR	I.NTTADEKDPTNPFR.F	1	15	1	1	1
Human	O14672	CD156c	PKPNFTDCNR	PKPN[115]FTDCNR	D.PKPNFTDCNR.H	1	15	1	1	1
Human	O14672	CD156c	TALCPASDPKPNFTDCNR	TALCPASDPKPN[115]FTDCNR	F.TALCPASDPKPNFTDCNR.H	1	15	1	1	1
Human	O14773	no	FLSSSPHLPPSSYFNASGR	FLSSSPHLPPSSYFN[115]ASGR	K.FLSSSPHLPPSSYFNASGR.A	1	1	2	1	1
Human	O14786	CD304	ECSQNYTTPSGVIK	ECSQN[115]YTTPSGVIK	P.ECSQNYTTPSGVIK.S	1	11	1	1	1
Human	O14786	CD304	EGFSANYSVLQSSVSEDFK	EGFSAN[115]YSVLQSSVSEDFK	K.EGFSANYSVLQSSVSEDFK.C	1	11	2	1	1
Human	O14786	CD304	GPECSQNYTTPSGVIK	GPECSQN[115]YTTPSGVIK	R.GPECSQNYTTPSGVIK.S	1	11	2	1	1
Human	O14786	CD304	IGYSNNGSDWK	IGYSN[115]N[115]GSDWK	K.IGYSNNGSDWK.M	1	11	2	1	2
Human	O14786	CD304	IGYSNNGSDWK	IGYSNN[115]GSDWK	K.IGYSNNGSDWK.M	1	11	2	1	1
Human	O14786	CD304	IGYSNNGSDWK	IGYSN[115]NGSDWK	K.IGYSNNGSDWK.M	1	11	2	0	1
Human	O14786	CD304	PECSQNYTTPSGVIK	PECSQN[115]YTTPSGVIK	G.PECSQNYTTPSGVIK.S	1	11	1	1	1
Human	O14786	CD304	RGPECSQNYTTPSGVIK	RGPECSQN[115]YTTPSGVIK	K.RGPECSQNYTTPSGVIK.S	1	11	2	1	1
Human	O14786	CD304	SANYSVLQSSVSEDFK	SAN[115]YSVLQSSVSEDFK	F.SANYSVLQSSVSEDFK.C	1	11	1	1	1
Human	O14786	CD304	SQNYTTPSGVIK	SQN[115]YTTPSGVIK	C.SQNYTTPSGVIK.S	1	11	1	1	1
Human	O14786	CD304	SQYSTNWSAER	SQYSTN[115]WSAER	S.SQYSTNWSAER.S	1	11	1	1	1
Human	O14817	no	CCGVSNYTDWFEVYNATR	CCGVSN[115]YTDWFEVYN[115]ATR	R.CCGVSNYTDWFEVYNATR.V	1	3	2	2	2
Human	O14817	no	GVSNYTDWFEVYNATR	GVSN[115]YTDWFEVYN[115]ATR	C.GVSNYTDWFEVYNATR.V	1	3	1	2	2
Human	O14817	no	TDWFEVYNATR	TDWFEVYN[115]ATR	Y.TDWFEVYNATR.V	1	3	1	1	1
Human	O14836	CD267	SGEVENNSDNSGR	SGEVEN[115]NSDNSGR	R.SGEVENNSDNSGR.Y	1	1	2	1	1
Human	O14917	no	DGGSPPLNSTK	DGGSPPLN[115]STK	R.DGGSPPLNSTK.S	0.99	4	2	1	1
Human	O14917	no	DSGAPAHLESNATVR	DSGAPAHLESN[115]ATVR	K.DSGAPAHLESNATVR.V	1	4	2	1	1
Human	O14917	no	ETQDEYNVTIVAR	ETQDEYN[115]VTIVAR	R.ETQDEYNVTIVAR.D	1	4	2	1	1
Human	O14917	no	VTVLDVNDNAPVIVLPTLQNDTAELQVPR	VTVLDVNDNAPVIVLPTLQN[115]DTAELQVPR	R.VTVLDVNDNAPVIVLPTLQNDTAELQVPR.N	1	4	2	1	1
Human	O14931	CD337	TLEGSSAFLPCSFNASQGR	TLEGSSAFLPCSFN[115]ASQGR	R.TLEGSSAFLPCSFNASQGR.L	1	2	2	1	1
Human	O14931	CD337	VEVLGLGVGTGNGTR	VEVLGLGVGTGN[115]GTR	R.VEVLGLGVGTGNGTR.L	1	2	2	1	1
Human	O15031	no	AAENNHTVAFLGTSDGR	AAENN[115]HTVAFLGTSDGR	V.AAENNHTVAFLGTSDGR.I	1	47	1	1	1
Human	O15031	no	ALCNTTSECPPPVITR	ALCN[115]TTSECPPPVITR	E.ALCNTTSECPPPVITR.I	1	47	1	1	1
Human	O15031	no	ALSNISLR	ALSN[115]ISLR	R.ALSNISLR.L	1	47	2	1	1
Human	O15031	no	CNTTSECPPPVITR	CN[115]TTSECPPPVITR	L.CNTTSECPPPVITR.I	1	47	1	1	1
Human	O15031	no	CVYEALCNTTSECPPPVITR	CVYEALCN[115]TTSECPPPVITR	R.CVYEALCNTTSECPPPVITR.I	1	47	2	1	1
Human	O15031	no	DANETLPLHLYVK	DAN[115]ETLPLHLYVK	H.DANETLPLHLYVK.S	1	47	1	1	1
Human	O15031	no	EAESLQPMTVVGTDYVFHNDTK	EAESLQPMTVVGTDYVFHN[115]DTK	R.EAESLQPMTVVGTDYVFHNDTK.V	1	47	2	1	1
Human	O15031	no	EYVPDPTFENFTGGVK	EYVPDPTFEN[115]FTGGVK	F.EYVPDPTFENFTGGVK.K	1	47	1	1	1
Human	O15031	no	GGLNLTAVTVAAENNHTVAF	GGLN[115]LTAVTVAAEN[115]N[115]HTVAF	R.GGLNLTAVTVAAENNHTVAF.L	1	47	1	2	3
Human	O15031	no	GGLNLTAVTVAAENNHTVAF	GGLN[115]LTAVTVAAENN[115]HTVAF	R.GGLNLTAVTVAAENNHTVAF.L	1	47	1	2	2
Human	O15031	no	GGLNLTAVTVAAENNHTVAF	GGLN[115]LTAVTVAAEN[115]NHTVAF	R.GGLNLTAVTVAAENNHTVAF.L	1	47	1	1	2
Human	O15031	no	GGLNLTAVTVAAENNHTVAFLGTSDGR	GGLN[115]LTAVTVAAEN[115]N[115]HTVAFLGTSDGR	R.GGLNLTAVTVAAENNHTVAFLGTSDGR.I	1	47	2	2	3
Human	O15031	no	GGLNLTAVTVAAENNHTVAFLGTSDGR	GGLN[115]LTAVTVAAENN[115]HTVAFLGTSDGR	R.GGLNLTAVTVAAENNHTVAFLGTSDGR.I	1	47	2	2	2
Human	O15031	no	GGLNLTAVTVAAENNHTVAFLGTSDGR	GGLNLTAVTVAAEN[115]N[115]HTVAFLGTSDGR	R.GGLNLTAVTVAAENNHTVAFLGTSDGR.I	1	47	2	1	2
Human	O15031	no	GGLNLTAVTVAAENNHTVAFLGTSDGR	GGLN[115]LTAVTVAAEN[115]NHTVAFLGTSDGR	R.GGLNLTAVTVAAENNHTVAFLGTSDGR.I	1	47	2	1	2
Human	O15031	no	GTDYVFHNDTK	GTDYVFHN[115]DTK	V.GTDYVFHNDTK.V	1	47	1	1	1
Human	O15031	no	HDANETLPLHLYVK	HDAN[115]ETLPLHLYVK	S.HDANETLPLHLYVK.S	0.98	47	1	1	1
Human	O15031	no	HVTLYNCSFGR	HVTLYN[115]CSFGR	L.HVTLYNCSFGR.S	1	47	1	1	1
Human	O15031	no	ISVAGRNCSFQPER	ISVAGRN[115]CSFQPER	R.ISVAGRNCSFQPER.Y	0.96	47	2	1	1
Human	O15031	no	LCNTTSECPPPVITR	LCN[115]TTSECPPPVITR	A.LCNTTSECPPPVITR.I	1	47	1	1	1
Human	O15031	no	LHVTLYNCSFGR	LHVTLYN[115]CSFGR	K.LHVTLYNCSFGR.S	1	47	2	1	1
Human	O15031	no	LSHDANETLPLH	LSHDAN[115]ETLPLH	K.LSHDANETLPLH.L	1	47	1	1	1
Human	O15031	no	LSHDANETLPLHL	LSHDAN[115]ETLPLHL	K.LSHDANETLPLHL.Y	1	47	1	1	1
Human	O15031	no	LSHDANETLPLHLY	LSHDAN[115]ETLPLHLY	K.LSHDANETLPLHLY.V	1	47	1	1	1
Human	O15031	no	LSHDANETLPLHLYV	LSHDAN[115]ETLPLHLYV	K.LSHDANETLPLHLYV.K	1	47	1	1	1
Human	O15031	no	LSHDANETLPLHLYVK	LSHDAN[115]ETLPLHLYVK	K.LSHDANETLPLHLYVK.S	1	47	2	1	1
Human	O15031	no	LSNISLR	LSN[115]ISLR	A.LSNISLR.L	0.96	47	1	1	1
Human	O15031	no	NCSFQPER	N[115]CSFQPER	R.NCSFQPER.Y	1	47	2	1	1
Human	O15031	no	NETLPLHLYVK	N[115]ETLPLHLYVK	A.NETLPLHLYVK.S	0.96	47	1	1	1
Human	O15031	no	PDPTFENFTGGVK	PDPTFEN[115]FTGGVK	V.PDPTFENFTGGVK.K	1	47	1	1	1
Human	O15031	no	PMTVVGTDYVFHNDTK	PMTVVGTDYVFHN[115]DTK	Q.PMTVVGTDYVFHNDTK.V	1	47	1	1	1
Human	O15031	no	PTFENFTGGVK	PTFEN[115]FTGGVK	D.PTFENFTGGVK.K	1	47	1	1	1
Human	O15031	no	SCVAVTSAQPQNMSR	SCVAVTSAQPQN[115]MSR	K.SCVAVTSAQPQNMSR.R	1	47	2	1	1
Human	O15031	no	SHDANETLPLHLYVK	SHDAN[115]ETLPLHLYVK	L.SHDANETLPLHLYVK.S	1	47	1	1	1
Human	O15031	no	SINVTGQGF	SIN[115]VTGQGF	R.SINVTGQGF.S	1	47	1	1	1
Human	O15031	no	SINVTGQGFSLIQR	SIN[115]VTGQGFSLIQR	R.SINVTGQGFSLIQR.F	1	47	2	1	1
Human	O15031	no	SKSCVAVTSAQPQNMSR	SKSCVAVTSAQPQN[115]MSR	R.SKSCVAVTSAQPQNMSR.R	1	47	2	1	1
Human	O15031	no	SKSCVAVTSAQPQNMSRR	SKSCVAVTSAQPQN[115]MSRR	R.SKSCVAVTSAQPQNMSRR.A	1	47	2	1	1
Human	O15031	no	TEAGAFEYVPDPTFENFTGGVK	TEAGAFEYVPDPTFEN[115]FTGGVK	R.TEAGAFEYVPDPTFENFTGGVK.K	1	47	2	1	1
Human	O15031	no	TEAGAFEYVPDPTFENFTGGVKK	TEAGAFEYVPDPTFEN[115]FTGGVKK	R.TEAGAFEYVPDPTFENFTGGVKK.Q	1	47	2	1	1
Human	O15031	no	TPKLSHDANETLPLHLYVK	TPKLSHDAN[115]ETLPLHLYVK	R.TPKLSHDANETLPLHLYVK.S	1	47	2	1	1
Human	O15031	no	TSAQPQNMSR	TSAQPQN[115]MSR	V.TSAQPQNMSR.R	0.96	47	1	1	1
Human	O15031	no	TVVGTDYVFHNDTK	TVVGTDYVFHN[115]DTK	M.TVVGTDYVFHNDTK.V	1	47	1	1	1
Human	O15031	no	VAVTSAQPQNMSR	VAVTSAQPQN[115]MSR	C.VAVTSAQPQNMSR.R	1	47	1	1	1
Human	O15031	no	VGTDYVFHNDTK	VGTDYVFHN[115]DTK	V.VGTDYVFHNDTK.V	1	47	1	1	1
Human	O15031	no	VPDPTFENFTGGVK	VPDPTFEN[115]FTGGVK	Y.VPDPTFENFTGGVK.K	1	47	1	1	1
Human	O15031	no	VVFLSPAVPEEPEAYNLTVLIEMDGHR	VVFLSPAVPEEPEAYN[115]LTVLIEMDGHR	K.VVFLSPAVPEEPEAYNLTVLIEMDGHR.A	1	47	2	1	1
Human	O15118	no	DADACNATNWIEYMFNK	DADACN[115]ATNWIEYMFNK	K.DADACNATNWIEYMFNK.D	1	13	2	1	1
Human	O15118	no	ELQYYVGQSFANAMYNACR	ELQYYVGQSFANAMYN[115]ACR	K.ELQYYVGQSFANAMYNACR.D	1	13	2	0	1
Human	O15118	no	LIASNVTETMGINGSAYR	LIASN[115]VTETMGIN[115]GSAYR	R.LIASNVTETMGINGSAYR.V	1	13	2	2	2
Human	O15118	no	NAAQLDNYTR	NAAQLDN[115]YTR	F.NAAQLDNYTR.I	1	13	1	1	1
Human	O15118	no	NPNLTISFTAER	NPN[115]LTISFTAER	K.NPNLTISFTAER.S	1	13	2	1	1
Human	O15118	no	NVTATEDYVDPVTNQTK	N[115]VTATEDYVDPVTN[115]QTK	L.NVTATEDYVDPVTNQTK.T	1	13	1	2	2
Human	O15118	no	NYKNPNLTISFTAER	NYKNPN[115]LTISFTAER	K.NYKNPNLTISFTAER.S	1	13	2	1	1
Human	O15118	no	NYKNPNLTISFTAER	NYKN[115]PNLTISFTAER	K.NYKNPNLTISFTAER.S	1	13	2	0	1
Human	O15118	no	PVTNQTK	PVTN[115]QTK	D.PVTNQTK.T	0.99	13	1	1	1
Human	O15118	no	QSQFLNVTATEDYVDPVTNQTK	QSQFLN[115]VTATEDYVDPVTN[115]QTK	R.QSQFLNVTATEDYVDPVTNQTK.T	1	13	2	2	2
Human	O15118	no	VDNITDQFCNASVVDPA	VDN[115]ITDQFCN[115]ASVVDPA	R.VDNITDQFCNASVVDPA.C	1	13	1	2	2
Human	O15118	no	VDNITDQFCNASVVDPACVR	VDN[115]ITDQFCN[115]ASVVDPACVR	R.VDNITDQFCNASVVDPACVR.C	1	13	2	2	2
Human	O15118	no	YVDPVTNQTK	YVDPVTN[115]QTK	D.YVDPVTNQTK.T	0.92	13	1	1	1
Human	O15230	no	AQQLLANSTALEEAMLQEQQR	AQQLLAN[115]STALEEAMLQEQQR	R.AQQLLANSTALEEAMLQEQQR.L	1	13	2	1	1
Human	O15230	no	DNATLQATLHAAR	DN[115]ATLQATLHAAR	R.DNATLQATLHAAR.D	1	13	2	1	1
Human	O15230	no	GINASSMAWAR	GIN[115]ASSMAWAR	R.GINASSMAWAR.L	1	13	2	1	1
Human	O15230	no	GLANASAPSGEQLLR	GLAN[115]ASAPSGEQLLR	L.GLANASAPSGEQLLR.T	1	13	1	1	1
Human	O15230	no	LANASAPSGEQLLR	LAN[115]ASAPSGEQLLR	G.LANASAPSGEQLLR.T	1	13	1	1	1
Human	O15230	no	LEVDAQSNHT	LEVDAQSN[115]HT	R.LEVDAQSNHT.V	1	13	1	1	1
Human	O15230	no	LEVDAQSNHTVGPL	LEVDAQSN[115]HTVGPL	R.LEVDAQSNHTVGPL.L	1	13	1	1	1
Human	O15230	no	LNASIADLQSQLR	LN[115]ASIADLQSQLR	R.LNASIADLQSQLR.S	1	13	2	1	1
Human	O15230	no	LNTTGVSAGCTADLLVGR	LN[115]TTGVSAGCTADLLVGR	R.LNTTGVSAGCTADLLVGR.A	1	13	2	1	1
Human	O15230	no	LVGGPVAGGDPNQTIR	LVGGPVAGGDPN[115]QTIR	K.LVGGPVAGGDPNQTIR.G	1	13	2	1	1
Human	O15230	no	PGAMNFSYSPLLR	PGAMN[115]FSYSPLLR	R.PGAMNFSYSPLLR.E	1	13	2	1	1
Human	O15230	no	TGFPSCYPTPSSSNDTR	TGFPSCYPTPSSSN[115]DTR	F.TGFPSCYPTPSSSNDTR.E	1	13	1	1	1
Human	O15230	no	TLSELMSQTGHLGLANASAPSGEQLLR	TLSELMSQTGHLGLAN[115]ASAPSGEQLLR	R.TLSELMSQTGHLGLANASAPSGEQLLR.T	1	13	2	1	1
Human	O15321	no	IIFANVSVR	IIFAN[115]VSVR	R.IIFANVSVR.D	1	1	2	1	1
Human	O15389	CD170	LEEKPLEGNSSQGSFK	LEEKPLEGN[115]SSQGSFK	R.LEEKPLEGNSSQGSFK.V	1	2	2	1	1
Human	O15389	CD170	PEDHGTNLTCQMK	PEDHGTN[115]LTCQMK	R.PEDHGTNLTCQMK.R	1	2	2	1	1
Human	O15394	no	AMLANNNLQILNINK	AMLANNNLQILNIN[115]K	F.AMLANNNLQILNINK.S	1	12	1	1	1
Human	O15394	no	ANNNLQILNINK	ANN[115]NLQILNIN[115]K	L.ANNNLQILNINK.S	0.99	12	1	1	2
Human	O15394	no	ANNNLQILNINK	ANNNLQILNIN[115]K	L.ANNNLQILNINK.S	1	12	1	1	1
Human	O15394	no	DKLVLPAKNTTNLK	DKLVLPAKN[115]TTNLK	R.DKLVLPAKNTTNLK.T	1	12	2	1	1
Human	O15394	no	FAMLANNNLQILNINK	FAMLANN[115]NLQILNIN[115]K	R.FAMLANNNLQILNINK.S	1	12	2	1	2
Human	O15394	no	FAMLANNNLQILNINK	FAMLANNNLQILNIN[115]K	R.FAMLANNNLQILNINK.S	1	12	2	1	1
Human	O15394	no	LVLPAKNTTNLK	LVLPAKN[115]TTNLK	K.LVLPAKNTTNLK.T	1	12	2	1	1
Human	O15394	no	NNNLQILNINK	NNNLQILNIN[115]K	A.NNNLQILNINK.S	0.98	12	1	1	1
Human	O15394	no	SFNATAER	SFN[115]ATAER	K.SFNATAER.G	1	12	2	1	1
Human	O15394	no	SHGVQTMVVLNNLEPNTTYEIR	SHGVQTMVVLNNLEPN[115]TTYEIR	R.SHGVQTMVVLNNLEPNTTYEIR.V	0.97	12	2	1	1
Human	O15394	no	YNCTATNHIGTR	YN[115]CTATN[115]HIGTR	R.YNCTATNHIGTR.F	1	12	2	1	2
Human	O15394	no	YNCTATNHIGTR	YN[115]CTATNHIGTR	R.YNCTATNHIGTR.F	1	12	2	1	1
Human	O15439	no	QSMLNVTVNGGGNVTEK	QSMLN[115]VTVN[115]GGGN[115]VTEK	K.QSMLNVTVNGGGNVTEK.L	1	2	2	2	3
Human	O15439	no	QSMLNVTVNGGGNVTEK	QSMLN[115]VTVNGGGN[115]VTEK	K.QSMLNVTVNGGGNVTEK.L	1	2	2	2	2
Human	O15440	no	GNETSVSDSMK	GN[115]ETSVSDSMK	R.GNETSVSDSMK.D	1	1	2	1	1
Human	O15455	CD283	LTQVPDDLPTNITVLNLTHNQLR	LTQVPDDLPTN[115]ITVLN[115]LTHNQLR	K.LTQVPDDLPTNITVLNLTHNQLR.R	1	3	2	2	2
Human	O15455	CD283	RLPAANFTR	RLPAAN[115]FTR	R.RLPAANFTR.Y	1	3	2	1	1
Human	O15455	CD283	SEELDIFANSSLK	SEELDIFAN[115]SSLK	K.SEELDIFANSSLK.K	1	3	2	1	1
Human	O15460	no	TAELLQVANYGVGGQYEPHFDFSR	TAELLQVAN[115]YGVGGQYEPHFDFSR	K.TAELLQVANYGVGGQYEPHFDFSR.N	1	3	2	0	1
Human	O15460	no	TLTNQTEAELATPEGIYER	TLTN[115]QTEAELATPEGIYER	K.TLTNQTEAELATPEGIYER.P	1	3	2	1	1
Human	O15460	no	TLTNQTEAELATPEGIYERPVDYLPER	TLTN[115]QTEAELATPEGIYERPVDYLPER	K.TLTNQTEAELATPEGIYERPVDYLPER.D	1	3	2	1	1
Human	O43155	no	IAVISDMAFQNLTSLER	IAVISDMAFQN[115]LTSLER	R.IAVISDMAFQNLTSLER.L	1	1	2	1	1
Human	O43157	no	YTLDPNITSAGPTK	YTLDPN[115]ITSAGPTK	K.YTLDPNITSAGPTK.S	1	1	2	1	1
Human	O43184	no	GLIVFENESYVLEPMK	GLIVFEN[115]ESYVLEPMK	R.GLIVFENESYVLEPMK.S	1	1	2	1	1
Human	O43194	no	HHEQPETSNMSICTN	HHEQPETSN[115]MSICTN	R.HHEQPETSNMSICTN.L	1	3	1	1	1
Human	O43194	no	HHEQPETSNMSICTNLSSR	HHEQPETSN[115]MSICTN[115]LSSR	R.HHEQPETSNMSICTNLSSR.W	1	3	2	2	2
Human	O43194	no	HHEQPETSNMSICTNLSSR	HHEQPETSN[115]MSICTNLSSR	R.HHEQPETSNMSICTNLSSR.W	1	3	2	1	1
Human	O43286	no	GPIDINMSEIGMDYIHELFSK	GPIDIN[115]MSEIGMDYIHELFSK	K.GPIDINMSEIGMDYIHELFSK.D	1	1	2	1	1
Human	O43306	no	LASSNETFDGLDCPAAGR	LASSN[115]ETFDGLDCPAAGR	G.LASSNETFDGLDCPAAGR.V	1	1	1	1	1
Human	O43462	no	LDGSTECCNNHSLTDVCFSYR	LDGSTECCNN[115]HSLTDVCFSYR	R.LDGSTECCNNHSLTDVCFSYR.N	1	1	2	1	1
Human	O43490	CD133	EALENMNSTLK	EALENMN[115]STLK	K.EALENMNSTLK.S	0.99	4	2	1	1
Human	O43490	CD133	VLNSIGSDIDNVTQR	VLN[115]SIGSDIDN[115]VTQR	R.VLNSIGSDIDNVTQR.L	1	4	2	1	2
Human	O43490	CD133	VLNSIGSDIDNVTQR	VLNSIGSDIDN[115]VTQR	R.VLNSIGSDIDNVTQR.L	1	4	2	1	1
Human	O43490	CD133	YILAQYNTTK	YILAQYN[115]TTK	K.YILAQYNTTK.D	1	4	2	1	1
Human	O43505	no	NELVQLYQVGEVRPFYYGLCTPCQAPTNYSR	NELVQLYQVGEVRPFYYGLCTPCQAPTN[115]YSR	K.NELVQLYQVGEVRPFYYGLCTPCQAPTNYSR.W	1	4	2	1	1
Human	O43505	no	QAPTNYSR	QAPTN[115]YSR	C.QAPTNYSR.W	0.97	4	1	1	1
Human	O43505	no	VAQPGINYALGTNVSYPNNLLR	VAQPGINYALGTN[115]VSYPNNLLR	R.VAQPGINYALGTNVSYPNNLLR.N	1	4	2	1	1
Human	O43505	no	VAQPGINYALGTNVSYPNNLLR	VAQPGIN[115]YALGTNVSYPNNLLR	R.VAQPGINYALGTNVSYPNNLLR.N	1	4	2	0	1
Human	O43556	no	LNAINITSALDR	LN[115]AIN[115]ITSALDR	R.LNAINITSALDR.G	1	2	2	1	2
Human	O43556	no	LNAINITSALDR	LNAIN[115]ITSALDR	R.LNAINITSALDR.G	1	2	2	1	1
Human	O43567	no	DILAYNFENASQTFDDLPAR	DILAYNFEN[115]ASQTFDDLPAR	A.DILAYNFENASQTFDDLPAR.F	1	4	1	1	1
Human	O43567	no	DNSSGTFIVLIR	DN[115]SSGTFIVLIR	K.DNSSGTFIVLIR.R	1	4	2	1	1
Human	O43567	no	NFENASQTFDDLPAR	NFEN[115]ASQTFDDLPAR	Y.NFENASQTFDDLPAR.F	1	4	1	1	1
Human	O43567	no	SKPENACEPIVPPPVK	SKPEN[115]ACEPIVPPPVK	N.SKPENACEPIVPPPVK.D	0.97	4	1	0	1
Human	O43570	no	ASLTPLEFQGYNLSANK	ASLTPLEFQGYN[115]LSANK	D.ASLTPLEFQGYNLSANK.Q	1	4	1	1	1
Human	O43570	no	DASLTPLEFQGYNLSANK	DASLTPLEFQGYN[115]LSANK	Y.DASLTPLEFQGYNLSANK.Q	1	4	1	1	1
Human	O43570	no	SLTPLEFQGYNLSANK	SLTPLEFQGYN[115]LSANK	A.SLTPLEFQGYNLSANK.Q	1	4	1	1	1
Human	O43570	no	TPLEFQGYNLSANK	TPLEFQGYN[115]LSANK	L.TPLEFQGYNLSANK.Q	1	4	1	1	1
Human	O43657	no	ALKQYNSTGDYR	ALKQYN[115]STGDYR	K.ALKQYNSTGDYR.S	1	2	2	1	1
Human	O43657	no	QYNSTGDYR	QYN[115]STGDYR	K.QYNSTGDYR.S	1	2	2	1	1
Human	O43688	no	VNCSVYVQLEK	VN[115]CSVYVQLEK	R.VNCSVYVQLEK.V	1	1	2	1	1
Human	O43699	CD327	ILQNTSSLPVLEGQALR	ILQN[115]TSSLPVLEGQALR	K.ILQNTSSLPVLEGQALR.L	1	1	2	1	1
Human	O43707	no	HTNYTMEHIR	HTN[115]YTMEHIR	K.HTNYTMEHIR.V	1	2	2	1	1
Human	O43707	no	ISIEMNGTLEDQLSHLK	ISIEMN[115]GTLEDQLSHLK	R.ISIEMNGTLEDQLSHLK.Q	1	2	2	1	1
Human	O43852	no	GHDLNEDGLVSWEEYKNATYGYVLDDPDPDDGFNYK	GHDLNEDGLVSWEEYKN[115]ATYGYVLDDPDPDDGFNYK	K.GHDLNEDGLVSWEEYKNATYGYVLDDPDPDDGFNYK.Q	1	2	2	1	1
Human	O43852	no	NATYGYVLDDPDPDDGFNYK	N[115]ATYGYVLDDPDPDDGFNYK	K.NATYGYVLDDPDPDDGFNYK.Q	1	2	2	1	1
Human	O43897	no	VIGGNFTGSQR	VIGGN[115]FTGSQR	F.VIGGNFTGSQR.A	1	1	1	1	1
Human	O43909	no	KSDTQNLLYNVSTGR	KSDTQNLLYN[115]VSTGR	R.KSDTQNLLYNVSTGR.A	1	3	2	1	1
Human	O43909	no	NFTLTVTDFYR	N[115]FTLTVTDFYR	R.NFTLTVTDFYR.S	1	3	2	1	1
Human	O43909	no	SDTQNLLYNVSTGR	SDTQNLLYN[115]VSTGR	K.SDTQNLLYNVSTGR.A	1	3	2	1	1
Human	O60243	no	PFMQYNSTR	PFMQYN[115]STR	R.PFMQYNSTR.A	0.99	1	2	1	1
Human	O60245	no	IDNLTGELSTSER	IDN[115]LTGELSTSER	K.IDNLTGELSTSER.R	1	1	2	1	1
Human	O60266	no	EHDLPMVALEQMQGFNPGLNGTDR	EHDLPMVALEQMQGFNPGLN[115]GTDR	R.EHDLPMVALEQMQGFNPGLNGTDR.L	1	2	2	1	1
Human	O60266	no	PGLNGTDR	PGLN[115]GTDR	N.PGLNGTDR.L	0.95	2	1	1	1
Human	O60279	no	VIYGNTDGPSGPFVGKNDSK	VIYGNTDGPSGPFVGKN[115]DSK	K.VIYGNTDGPSGPFVGKNDSK.A	1	1	2	1	1
Human	O60330	no	EQVPSYNITVTATDR	EQVPSYN[115]ITVTATDR	R.EQVPSYNITVTATDR.G	1	1	2	1	1
Human	O60449	CD205	CSMLIASNETWK	CSMLIASN[115]ETWK	R.CSMLIASNETWK.K	1	35	2	1	1
Human	O60449	CD205	DGHGTAISNASDVWK	DGHGTAISN[115]ASDVWK	K.DGHGTAISNASDVWK.K	1	35	2	1	1
Human	O60449	CD205	EEYNTTLPQF	EEYN[115]TTLPQF	K.EEYNTTLPQF.M	0.99	35	1	1	1
Human	O60449	CD205	EEYNTTLPQFMPYEDGIYSVIQK	EEYN[115]TTLPQFMPYEDGIYSVIQK	K.EEYNTTLPQFMPYEDGIYSVIQK.K	1	35	2	1	1
Human	O60449	CD205	ENNNITMR	ENN[115]N[115]ITMR	R.ENNNITMR.V	1	35	2	1	2
Human	O60449	CD205	ENNNITMR	ENNN[115]ITMR	R.ENNNITMR.V	1	35	2	1	1
Human	O60449	CD205	ENNNITMR	ENN[115]NITMR	R.ENNNITMR.V	1	35	2	0	1
Human	O60449	CD205	FTGTWNFTSCSER	FTGTWN[115]FTSCSER	P.FTGTWNFTSCSER.H	1	35	1	1	1
Human	O60449	CD205	GHGTAISNASDVWK	GHGTAISN[115]ASDVWK	D.GHGTAISNASDVWK.K	1	35	1	1	1
Human	O60449	CD205	GTNCNLTITSR	GTNCN[115]LTITSR	F.GTNCNLTITSR.F	1	35	1	1	1
Human	O60449	CD205	IANISGDGQK	IAN[115]ISGDGQK	K.IANISGDGQK.W	1	35	2	1	1
Human	O60449	CD205	IYEDEVPFGTNCNLTITSR	IYEDEVPFGTN[115]CN[115]LTITSR	K.IYEDEVPFGTNCNLTITSR.F	1	35	2	1	2
Human	O60449	CD205	IYEDEVPFGTNCNLTITSR	IYEDEVPFGTNCN[115]LTITSR	K.IYEDEVPFGTNCNLTITSR.F	1	35	2	1	1
Human	O60449	CD205	KPLNNTVELTDVWTY	KPLN[115]NTVELTDVWTY	R.KPLNNTVELTDVWTY.S	1	35	1	1	1
Human	O60449	CD205	KPLNNTVELTDVWTY	KPLNN[115]TVELTDVWTY	R.KPLNNTVELTDVWTY.S	1	35	1	0	1
Human	O60449	CD205	KPLNNTVELTDVWTYSDTR	KPLN[115]NTVELTDVWTYSDTR	R.KPLNNTVELTDVWTYSDTR.C	1	35	2	1	1
Human	O60449	CD205	KPLNNTVELTDVWTYSDTR	KPLNN[115]TVELTDVWTYSDTR	R.KPLNNTVELTDVWTYSDTR.C	1	35	2	0	1
Human	O60449	CD205	LIASNETWK	LIASN[115]ETWK	M.LIASNETWK.K	1	35	1	1	1
Human	O60449	CD205	LLVNESNSWDK	LLVN[115]ESNSWDK	Y.LLVNESNSWDK.A	1	35	1	1	1
Human	O60449	CD205	LLVNESNSWDK	LLVNESN[115]SWDK	Y.LLVNESNSWDK.A	1	35	1	0	1
Human	O60449	CD205	LPFICEKYNVSSLEK	LPFICEKYN[115]VSSLEK	K.LPFICEKYNVSSLEK.Y	1	35	2	1	1
Human	O60449	CD205	LVNESNSWDK	LVN[115]ESNSWDK	L.LVNESNSWDK.A	1	35	1	1	1
Human	O60449	CD205	NKIANISGDGQK	NKIAN[115]ISGDGQK	K.NKIANISGDGQK.W	1	35	2	1	1
Human	O60449	CD205	NNSLMWFDK	N[115]NSLMWFDK	R.NNSLMWFDK.T	1	35	2	1	1
Human	O60449	CD205	NNSLMWFDK	NN[115]SLMWFDK	R.NNSLMWFDK.T	1	35	2	0	1
Human	O60449	CD205	QTLQNASETVK	QTLQN[115]ASETVK	R.QTLQNASETVK.Y	1	35	2	1	1
Human	O60449	CD205	SPFTGTWNFTSCSER	SPFTGTWN[115]FTSCSER	K.SPFTGTWNFTSCSER.H	1	35	2	1	1
Human	O60449	CD205	TGTWNFTSCSER	TGTWN[115]FTSCSER	F.TGTWNFTSCSER.H	1	35	1	1	1
Human	O60449	CD205	TLTYWDENEPNVPYNK	TLTYWDENEPNVPYN[115]K	V.TLTYWDENEPNVPYNK.T	1	35	1	1	1
Human	O60449	CD205	TVDCNDNQPGAICYYSGNETEK	TVDCN[115]DNQPGAICYYSGN[115]ETEK	K.TVDCNDNQPGAICYYSGNETEK.E	1	35	2	1	2
Human	O60449	CD205	TVDCNDNQPGAICYYSGNETEK	TVDCNDNQPGAICYYSGN[115]ETEK	K.TVDCNDNQPGAICYYSGNETEK.E	1	35	2	1	1
Human	O60449	CD205	TYWDENEPNVPYNK	TYWDENEPNVPYN[115]K	L.TYWDENEPNVPYNK.T	1	35	1	1	1
Human	O60449	CD205	WDENEPNVPYNK	WDENEPNVPYN[115]K	Y.WDENEPNVPYNK.T	1	35	1	1	1
Human	O60449	CD205	YLLVNESNSWDK	YLLVN[115]ESNSWDK	C.YLLVNESNSWDK.A	1	35	1	1	1
Human	O60449	CD205	YNVSSLEK	YN[115]VSSLEK	K.YNVSSLEK.Y	1	35	2	1	1
Human	O60462	no	NFTSPNGTIESPGFPEK	N[115]FTSPN[115]GTIESPGFPEK	K.NFTSPNGTIESPGFPEK.Y	1	3	2	2	2
Human	O60462	no	NFTSPNGTIESPGFPEK	NFTSPN[115]GTIESPGFPEK	K.NFTSPNGTIESPGFPEK.Y	1	3	2	1	1
Human	O60462	no	TGSEDCSKNFTSPNGTIESPGFPEK	TGSEDCSKN[115]FTSPN[115]GTIESPGFPEK	K.TGSEDCSKNFTSPNGTIESPGFPEK.Y	1	3	2	2	2
Human	O60486	CD232	ASNITMILK	ASN[115]ITMILK	R.ASNITMILK.G	1	17	2	1	1
Human	O60486	CD232	CEVRPLGNLSR	CEVRPLGN[115]LSR	A.CEVRPLGNLSR.N	1	17	1	1	1
Human	O60486	CD232	DQAGNCTEPVSLAPPAR	DQAGN[115]CTEPVSLAPPAR	R.DQAGNCTEPVSLAPPAR.P	1	17	2	1	1
Human	O60486	CD232	DQAGNCTEPVSLAPPARPR	DQAGN[115]CTEPVSLAPPARPR	R.DQAGNCTEPVSLAPPARPR.P	1	17	2	1	1
Human	O60486	CD232	DVIQVSHVLNDTHMK	DVIQVSHVLN[115]DTHMK	K.DVIQVSHVLNDTHMK.F	1	17	2	1	1
Human	O60486	CD232	ENDNFNISK	ENDNFN[115]ISK	K.ENDNFNISK.K	0.96	17	2	1	1
Human	O60486	CD232	FNFTNCSSLK	FN[115]FTN[115]CSSLK	R.FNFTNCSSLK.E	1	17	2	2	2
Human	O60486	CD232	FNFTNCSSLK	FN[115]FTNCSSLK	R.FNFTNCSSLK.E	1	17	2	1	1
Human	O60486	CD232	GACEVRPLGNLSR	GACEVRPLGN[115]LSR	R.GACEVRPLGNLSR.N	1	17	2	1	1
Human	O60486	CD232	GTSTCDKDVIQVSHVLNDTHMK	GTSTCDKDVIQVSHVLN[115]DTHMK	K.GTSTCDKDVIQVSHVLNDTHMK.F	1	17	2	1	1
Human	O60486	CD232	NGTEVVSCHPQGSTAGVVYR	N[115]GTEVVSCHPQGSTAGVVYR	R.NGTEVVSCHPQGSTAGVVYR.A	1	17	2	1	1
Human	O60486	CD232	RPLGNLSR	RPLGN[115]LSR	V.RPLGNLSR.N	0.97	17	1	1	1
Human	O60486	CD232	SNVIVTGANFTR	SN[115]VIVTGAN[115]FTR	K.SNVIVTGANFTR.A	1	17	2	1	2
Human	O60486	CD232	SNVIVTGANFTR	SNVIVTGAN[115]FTR	K.SNVIVTGANFTR.A	1	17	2	1	1
Human	O60486	CD232	SVYGTVVMNR	SVYGTVVMN[115]R	T.SVYGTVVMNR.T	0.95	17	1	1	1
Human	O60486	CD232	VILGENLTSNCPEVIYEIK	VILGEN[115]LTSNCPEVIYEIK	K.VILGENLTSNCPEVIYEIK.E	1	17	2	1	1
Human	O60486	CD232	VQPIASSTLIHSDLTSVYGTVVMNR	VQPIASSTLIHSDLTSVYGTVVMN[115]R	R.VQPIASSTLIHSDLTSVYGTVVMNR.T	1	17	2	1	1
Human	O60487	no	LQFDDNGTYTCQVK	LQFDDN[115]GTYTCQVK	K.LQFDDNGTYTCQVK.N	1	2	2	1	1
Human	O60487	no	VLEAVNGTDAR	VLEAVN[115]GTDAR	R.VLEAVNGTDAR.L	1	2	2	1	1
Human	O60503	no	GDSSNLTATAR	GDSSN[115]LTATAR	R.GDSSNLTATAR.P	1	3	2	1	1
Human	O60503	no	NPCNSSVPR	NPCN[115]SSVPR	R.NPCNSSVPR.D	1	3	2	1	1
Human	O60503	no	YVSLCPDSSVLTSPLDAVQNFSSER	YVSLCPDSSVLTSPLDAVQN[115]FSSER	L.YVSLCPDSSVLTSPLDAVQNFSSER.N	1	3	1	1	1
Human	O60512	no	DVYSNLSHLPGAPGGPPAPQGLPYCPER	DVYSN[115]LSHLPGAPGGPPAPQGLPYCPER	R.DVYSNLSHLPGAPGGPPAPQGLPYCPER.S	1	7	2	1	1
Human	O60512	no	ELGPLYTNITADIGTDPR	ELGPLYTN[115]ITADIGTDPR	R.ELGPLYTNITADIGTDPR.G	1	7	2	1	1
Human	O60512	no	PARPGPLSTANHTALR	PARPGPLSTAN[115]HTALR	P.PARPGPLSTANHTALR.G	1	7	1	1	1
Human	O60512	no	PGPLSTANHTALR	PGPLSTAN[115]HTALR	R.PGPLSTANHTALR.G	1	7	2	1	1
Human	O60512	no	PPARPGPLSTANHTALR	PPARPGPLSTAN[115]HTALR	R.PPARPGPLSTANHTALR.G	1	7	2	1	1
Human	O60512	no	RPPARPGPLSTANHTALR	RPPARPGPLSTAN[115]HTALR	R.RPPARPGPLSTANHTALR.G	1	7	2	1	1
Human	O60512	no	VIHQAGNGTFNR	VIHQAGN[115]GTFNR	Y.VIHQAGNGTFNR.A	0.95	7	1	1	1
Human	O60565	no	AQHNDSEQTQSPQQPGSR	AQHN[115]DSEQTQSPQQPGSR	K.AQHNDSEQTQSPQQPGSR.N	1	1	2	1	1
Human	O60568	no	EQYIHENYSR	EQYIHEN[115]YSR	K.EQYIHENYSR.A	1	5	2	1	1
Human	O60568	no	IHENYSR	IHEN[115]YSR	Y.IHENYSR.A	0.91	5	1	1	1
Human	O60568	no	QYIHENYSR	QYIHEN[115]YSR	E.QYIHENYSR.A	0.98	5	1	1	1
Human	O60568	no	SAEFFNYTVR	SAEFFN[115]YTVR	R.SAEFFNYTVR.T	1	5	2	1	1
Human	O60568	no	YIHENYSR	YIHEN[115]YSR	Q.YIHENYSR.A	0.92	5	1	1	1
Human	O60603	CD282	NLTNIDISK	N[115]LTNIDISK	K.NLTNIDISK.N	1	3	2	1	1
Human	O60603	CD282	SIQNVSHLILH	SIQN[115]VSHLILH	K.SIQNVSHLILH.M	1	3	1	1	1
Human	O60603	CD282	YLNLSSTR	YLN[115]LSSTR	K.YLNLSSTR.I	1	3	2	1	1
Human	O60635	no	DYGSQEDFTQVWNTTMK	DYGSQEDFTQVWN[115]TTMK	K.DYGSQEDFTQVWNTTMK.G	1	1	2	1	1
Human	O60636	no	GKGNGTLITFH	GKGN[115]GTLITFH	R.GKGNGTLITFH.S	1	2	1	1	1
Human	O60636	no	GKGNGTLITFHSTFQCCGK	GKGN[115]GTLITFHSTFQCCGK	R.GKGNGTLITFHSTFQCCGK.E	1	2	2	1	1
Human	O60637	no	ETASNCNGSLAHPSDLYAEGCEALVVK	ETASN[115]CN[115]GSLAHPSDLYAEGCEALVVK	R.ETASNCNGSLAHPSDLYAEGCEALVVK.K	1	10	2	1	2
Human	O60637	no	ETASNCNGSLAHPSDLYAEGCEALVVK	ETASNCN[115]GSLAHPSDLYAEGCEALVVK	R.ETASNCNGSLAHPSDLYAEGCEALVVK.K	1	10	2	1	1
Human	O60637	no	ETASNCNGSLAHPSDLYAEGCEALVVK	ETASN[115]CNGSLAHPSDLYAEGCEALVVK	R.ETASNCNGSLAHPSDLYAEGCEALVVK.K	1	10	2	0	1
Human	O60637	no	GIHNYSDWENTDWFK	GIHN[115]YSDWENTDWFK	C.GIHNYSDWENTDWFK.E	0.99	10	1	1	1
Human	O60637	no	NQSVPLSCCR	N[115]QSVPLSCCR	K.NQSVPLSCCR.E	1	10	2	1	1
Human	O60637	no	SIQKVYKTYNGTNPDAASR	SIQKVYKTYN[115]GTNPDAASR	R.SIQKVYKTYNGTNPDAASR.A	1	10	2	1	1
Human	O60637	no	TYNGTNPDAASR	TYN[115]GTN[115]PDAASR	K.TYNGTNPDAASR.A	1	10	2	1	2
Human	O60637	no	TYNGTNPDAASR	TYN[115]GTNPDAASR	K.TYNGTNPDAASR.A	1	10	2	1	1
Human	O60637	no	VYKTYNGTNPDAASR	VYKTYN[115]GTNPDAASR	K.VYKTYNGTNPDAASR.A	1	10	2	1	1
Human	O60637	no	YNGTNPDAASR	YN[115]GTNPDAASR	T.YNGTNPDAASR.A	1	10	1	1	1
Human	O60656	no	PSNLANNTILVK	PSNLAN[115]NTILVK	R.PSNLANNTILVK.W	1	2	2	1	1
Human	O60656	no	YTGTRPSNLANNTILVK	YTGTRPSNLAN[115]NTILVK	R.YTGTRPSNLANNTILVK.W	1	2	2	1	1
Human	O60779	no	LGPDKNLTER	LGPDKN[115]LTER	L.LGPDKNLTER.E	0.99	2	1	1	1
Human	O60779	no	LLGPDKNLTER	LLGPDKN[115]LTER	Y.LLGPDKNLTER.E	1	2	1	1	1
Human	O60896	no	QFFSNCTVDR	QFFSN[115]CTVDR	R.QFFSNCTVDR.V	1	1	2	1	1
Human	O60911	no	YRPENSVANDTGFTVVAPGK	YRPENSVAN[115]DTGFTVVAPGK	K.YRPENSVANDTGFTVVAPGK.E	1	1	2	1	1
Human	O60931	no	LHGNHSNQTGPR	LHGN[115]HSN[115]QTGPR	Y.LHGNHSNQTGPR.I	1	1	1	2	2
Human	O60939	no	MEVTVPATLNVLNGSDAR	MEVTVPATLNVLN[115]GSDAR	S.MEVTVPATLNVLNGSDAR.L	1	1	1	1	1
Human	O75015	CD16b	ATVNDSGEYR	ATVN[115]DSGEYR	A.ATVNDSGEYR.C	1	4	1	1	1
Human	O75015	CD16b	CQTNLSTLSDPVQLEVH	CQTN[115]LSTLSDPVQLEVH	R.CQTNLSTLSDPVQLEVH.I	1	4	1	1	1
Human	O75015	CD16b	FIDAATVNDSGEYR	FIDAATVN[115]DSGEYR	Y.FIDAATVNDSGEYR.C	1	4	1	1	1
Human	O75015	CD16b	TVNDSGEYR	TVN[115]DSGEYR	A.TVNDSGEYR.C	0.99	4	1	1	1
Human	O75019	CD85i	AGLSQANFTLGPVSR	AGLSQAN[115]FTLGPVSR	Q.AGLSQANFTLGPVSR.S	1	2	1	1	1
Human	O75019	CD85i	GLSQANFTLGPVSR	GLSQAN[115]FTLGPVSR	A.GLSQANFTLGPVSR.S	1	2	1	1	1
Human	O75051	no	LTGNLTIQVAHK	LTGN[115]LTIQVAHK	K.LTGNLTIQVAHK.T	1	1	2	1	1
Human	O75054	no	AEDTAGQTALTVMRPDASLQVDTVVPNATVSEK	AEDTAGQTALTVMRPDASLQVDTVVPN[115]ATVSEK	R.AEDTAGQTALTVMRPDASLQVDTVVPNATVSEK.A	1	20	2	1	1
Human	O75054	no	ASLQVDTVVPNATVSEK	ASLQVDTVVPN[115]ATVSEK	D.ASLQVDTVVPNATVSEK.A	1	20	1	1	1
Human	O75054	no	DTGNYSCHVEEWLPSPQK	DTGN[115]YSCHVEEWLPSPQK	Q.DTGNYSCHVEEWLPSPQK.E	1	20	1	1	1
Human	O75054	no	GNSTLLHITDLQAR	GN[115]STLLHITDLQAR	Q.GNSTLLHITDLQAR.D	1	20	1	1	1
Human	O75054	no	KNYNNTWTR	KNYN[115]NTWTR	R.KNYNNTWTR.L	1	20	2	1	1
Human	O75054	no	LSQAQGNLSVLETR	LSQAQGN[115]LSVLETR	R.LSQAQGNLSVLETR.Q	1	20	2	1	1
Human	O75054	no	LTVLQASPQDTGNYSCHVEEWLPSPQK	LTVLQASPQDTGN[115]YSCHVEEWLPSPQK	R.LTVLQASPQDTGNYSCHVEEWLPSPQK.E	1	20	2	1	1
Human	O75054	no	NYNNTWTR	NYN[115]NTWTR	K.NYNNTWTR.L	1	20	2	1	1
Human	O75054	no	PDASLQVDTVVPNATVSEK	PDASLQVDTVVPN[115]ATVSEK	R.PDASLQVDTVVPNATVSEK.A	1	20	2	1	1
Human	O75054	no	QVQLECVVLNR	QVQLECVVLN[115]R	R.QVQLECVVLNR.T	1	20	2	1	1
Human	O75054	no	RAEDTAGQTALTVMRPDASLQVDTVVPNATVSEK	RAEDTAGQTALTVMRPDASLQVDTVVPN[115]ATVSEK	K.RAEDTAGQTALTVMRPDASLQVDTVVPNATVSEK.A	1	20	2	1	1
Human	O75054	no	SQAQGNLSVLETR	SQAQGN[115]LSVLETR	L.SQAQGNLSVLETR.Q	1	20	1	1	1
Human	O75054	no	SSISVEVASNASVILEGEDLR	SSISVEVASN[115]ASVILEGEDLR	K.SSISVEVASNASVILEGEDLR.F	1	20	2	1	1
Human	O75054	no	TLTLVENKPIQLNCSVK	TLTLVENKPIQLN[115]CSVK	R.TLTLVENKPIQLNCSVK.S	1	20	2	1	1
Human	O75054	no	TVMRPDASLQVDTVVPNATVSEK	TVMRPDASLQVDTVVPN[115]ATVSEK	L.TVMRPDASLQVDTVVPNATVSEK.A	1	20	1	1	1
Human	O75054	no	VMRPDASLQVDTVVPNATVSEK	VMRPDASLQVDTVVPN[115]ATVSEK	T.VMRPDASLQVDTVVPNATVSEK.A	1	20	1	1	1
Human	O75054	no	VQGNSTLLH	VQGN[115]STLLH	R.VQGNSTLLH.I	0.9	20	1	1	1
Human	O75054	no	VQGNSTLLHITDLQ	VQGN[115]STLLHITDLQ	R.VQGNSTLLHITDLQ.A	1	20	1	1	1
Human	O75054	no	VQGNSTLLHITDLQA	VQGN[115]STLLHITDLQA	R.VQGNSTLLHITDLQA.R	1	20	1	1	1
Human	O75054	no	VQGNSTLLHITDLQAR	VQGN[115]STLLHITDLQAR	R.VQGNSTLLHITDLQAR.D	1	20	2	1	1
Human	O75063	no	LTVGNNTCFYGK	LTVGN[115]NTCFYGK	F.LTVGNNTCFYGK.C	0.96	1	1	1	1
Human	O75071	no	LEGMNETVSNLTQR	LEGMN[115]ETVSN[115]LTQR	K.LEGMNETVSNLTQR.V	1	2	2	2	2
Human	O75071	no	VWINITEMNK	VWIN[115]ITEMNK	K.VWINITEMNK.Q	1	2	2	1	1
Human	O75072	no	NFEQVKNTSHGSTSQCK	NFEQVKN[115]TSHGSTSQCK	K.NFEQVKNTSHGSTSQCK.F	0.99	1	2	1	1
Human	O75094	no	DLEILTLNNNNISR	DLEILTLNNNN[115]ISR	R.DLEILTLNNNNISR.I	1	1	2	1	1
Human	O75096	no	ADLNGSNMETVIGR	ADLN[115]GSNMETVIGR	R.ADLNGSNMETVIGR.G	1	3	2	1	1
Human	O75096	no	ANLNGSNVEEVVSTGLESPGGLAVDWVHDK	ANLN[115]GSNVEEVVSTGLESPGGLAVDWVHDK	R.ANLNGSNVEEVVSTGLESPGGLAVDWVHDK.L	1	3	2	1	1
Human	O75096	no	VLINNSLDEPR	VLIN[115]NSLDEPR	K.VLINNSLDEPR.A	1	3	2	1	1
Human	O75121	no	WQMHDSGLLNITK	WQMHDSGLLN[115]ITK	K.WQMHDSGLLNITK.V	1	1	2	1	1
Human	O75144	CD275	HIPQNSSLENVDSR	HIPQN[115]SSLEN[115]VDSR	Y.HIPQNSSLENVDSR.Y	0.99	11	1	1	2
Human	O75144	CD275	HIPQNSSLENVDSR	HIPQN[115]SSLENVDSR	Y.HIPQNSSLENVDSR.Y	1	11	1	1	1
Human	O75144	CD275	HIPQNSSLENVDSR	HIPQNSSLEN[115]VDSR	Y.HIPQNSSLENVDSR.Y	0.99	11	1	0	1
Human	O75144	CD275	IPQNSSLENVDSR	IPQN[115]SSLENVDSR	H.IPQNSSLENVDSR.Y	1	11	1	1	1
Human	O75144	CD275	LFNVTPQDEQK	LFN[115]VTPQDEQK	R.LFNVTPQDEQK.F	1	11	2	1	1
Human	O75144	CD275	LLQQNLTVGSQTGNDIGER	LLQQN[115]LTVGSQTGNDIGER	V.LLQQNLTVGSQTGNDIGER.D	1	11	1	1	1
Human	O75144	CD275	PNVYWINK	PNVYWIN[115]K	R.PNVYWINK.T	1	11	2	1	1
Human	O75144	CD275	TDNSLLDQALQNDTVF	TDNSLLDQALQN[115]DTVF	K.TDNSLLDQALQNDTVF.L	1	11	1	1	1
Human	O75144	CD275	TDNSLLDQALQNDTVFLNMR	TDNSLLDQALQN[115]DTVFLN[115]MR	K.TDNSLLDQALQNDTVFLNMR.G	1	11	2	1	2
Human	O75144	CD275	TDNSLLDQALQNDTVFLNMR	TDNSLLDQALQN[115]DTVFLNMR	K.TDNSLLDQALQNDTVFLNMR.G	1	11	2	1	1
Human	O75144	CD275	TVVTYHIPQNSSLENVDSR	TVVTYHIPQN[115]SSLENVDSR	K.TVVTYHIPQNSSLENVDSR.Y	1	11	2	1	1
Human	O75197	no	IEVANLNGTSR	IEVAN[115]LN[115]GTSR	R.IEVANLNGTSR.K	1	2	2	1	2
Human	O75197	no	IEVANLNGTSR	IEVANLN[115]GTSR	R.IEVANLNGTSR.K	1	2	2	1	1
Human	O75326	CD108	EDNPDKNPEAPLNVSR	EDNPDKNPEAPLN[115]VSR	R.EDNPDKNPEAPLNVSR.V	1	6	2	1	1
Human	O75326	CD108	HPSCWNLVNGTVVPLGEMR	HPSCWNLVN[115]GTVVPLGEMR	R.HPSCWNLVNGTVVPLGEMR.G	1	6	2	1	1
Human	O75326	CD108	LVNGTVVPLGEMR	LVN[115]GTVVPLGEMR	N.LVNGTVVPLGEMR.G	1	6	1	1	1
Human	O75326	CD108	PEAPLNVSR	PEAPLN[115]VSR	N.PEAPLNVSR.V	1	6	1	1	1
Human	O75326	CD108	PSCWNLVNGTVVPLGEMR	PSCWNLVN[115]GTVVPLGEMR	H.PSCWNLVNGTVVPLGEMR.G	1	6	1	1	1
Human	O75326	CD108	SCWNLVNGTVVPLGEMR	SCWNLVN[115]GTVVPLGEMR	P.SCWNLVNGTVVPLGEMR.G	1	6	1	1	1
Human	O75387	no	NEGFYSSTCPAESSTNTTQDEQR	NEGFYSSTCPAESSTN[115]TTQDEQR	K.NEGFYSSTCPAESSTNTTQDEQR.R	1	3	2	1	1
Human	O75387	no	SSTCPAESSTNTTQDEQR	SSTCPAESSTN[115]TTQDEQR	Y.SSTCPAESSTNTTQDEQR.R	1	3	1	1	1
Human	O75387	no	STCPAESSTNTTQDEQR	STCPAESSTN[115]TTQDEQR	S.STCPAESSTNTTQDEQR.R	1	3	1	1	1
Human	O75396	no	ANNLSSLSK	ANN[115]LSSLSK	K.ANNLSSLSK.K	1	1	2	1	1
Human	O75462	no	VVDDVSNQTSCR	VVDDVSN[115]QTSCR	K.VVDDVSNQTSCR.L	1	1	2	1	1
Human	O75477	no	NYTADYDK	N[115]YTADYDK	R.NYTADYDK.T	1	1	2	1	1
Human	O75487	no	EFDYNATDHAGK	EFDYN[115]ATDHAGK	S.EFDYNATDHAGK.S	1	2	1	1	1
Human	O75487	no	FDYNATDHAGK	FDYN[115]ATDHAGK	E.FDYNATDHAGK.S	0.99	2	1	1	1
Human	O75503	no	NIETNYTR	NIETN[115]YTR	K.NIETNYTR.I	1	1	2	1	1
Human	O75509	no	PAGTYVSEHCTNTSLR	PAGTYVSEHCTN[115]TSLR	C.PAGTYVSEHCTNTSLR.V	1	3	1	1	1
Human	O75509	no	SIQEGTVPDNTSSAR	SIQEGTVPDN[115]TSSAR	S.SIQEGTVPDNTSSAR.G	1	3	1	1	1
Human	O75509	no	VLSSIQEGTVPDNTSSAR	VLSSIQEGTVPDN[115]TSSAR	K.VLSSIQEGTVPDNTSSAR.G	1	3	2	1	1
Human	O75578	no	LNGSNTQCQVVR	LN[115]GSNTQCQVVR	R.LNGSNTQCQVVR.C	1	2	2	1	1
Human	O75578	no	LNGSNTQCQVVR	LNGSN[115]TQCQVVR	R.LNGSNTQCQVVR.C	1	2	2	0	1
Human	O75629	no	VNETEMDIAK	VN[115]ETEMDIAK	K.VNETEMDIAK.H	1	1	2	1	1
Human	O75718	no	AVQFFNVTTLQK	AVQFFN[115]VTTLQK	E.AVQFFNVTTLQK.E	1	4	1	1	1
Human	O75718	no	DTWGLSDEHFQPRPEAVQFFNVTTLQK	DTWGLSDEHFQPRPEAVQFFN[115]VTTLQK	R.DTWGLSDEHFQPRPEAVQFFNVTTLQK.E	1	4	2	1	1
Human	O75718	no	NCSAAPQPEPAAGLASYPELR	N[115]CSAAPQPEPAAGLASYPELR	R.NCSAAPQPEPAAGLASYPELR.L	1	4	2	1	1
Human	O75718	no	PEAVQFFNVTTLQK	PEAVQFFN[115]VTTLQK	R.PEAVQFFNVTTLQK.E	1	4	2	1	1
Human	O75882	no	AATCINPLNGSVCER	AATCINPLN[115]GSVCER	K.AATCINPLNGSVCER.P	1	8	2	1	1
Human	O75882	no	CINQSICEK	CIN[115]QSICEK	K.CINQSICEK.C	1	8	2	1	1
Human	O75882	no	DLDMFINASK	DLDMFIN[115]ASK	R.DLDMFINASK.N	1	8	2	1	1
Human	O75882	no	GICNSSDVR	GICN[115]SSDVR	R.GICNSSDVR.G	1	8	2	1	1
Human	O75882	no	IDSTGNVTNELR	IDSTGN[115]VTNELR	K.IDSTGNVTNELR.V	1	8	2	1	1
Human	O75882	no	ISNSSDTVECECSENWK	ISN[115]SSDTVECECSENWK	K.ISNSSDTVECECSENWK.G	1	8	2	1	1
Human	O75882	no	VFHIHNESWVLLTPK	VFHIHN[115]ESWVLLTPK	R.VFHIHNESWVLLTPK.A	1	8	2	1	1
Human	O75882	no	VPVPANQSFWTR	VPVPAN[115]QSFWTR	S.VPVPANQSFWTR.E	0.99	8	1	1	1
Human	O75954	no	NATTPLWR	N[115]ATTPLWR	R.NATTPLWR.T	1	1	2	1	1
Human	O75976	no	DLDTDFTNNASQPETK	DLDTDFTN[115]N[115]ASQPETK	K.DLDTDFTNNASQPETK.A	1	16	2	1	2
Human	O75976	no	DLDTDFTNNASQPETK	DLDTDFTNN[115]ASQPETK	K.DLDTDFTNNASQPETK.A	1	16	2	1	1
Human	O75976	no	DSITGSGLENATISVAGINHNITTGR	DSITGSGLEN[115]ATISVAGINHN[115]ITTGR	K.DSITGSGLENATISVAGINHNITTGR.F	1	16	2	2	2
Human	O75976	no	DSITGSGLENATISVAGINHNITTGR	DSITGSGLENATISVAGIN[115]HN[115]ITTGR	K.DSITGSGLENATISVAGINHNITTGR.F	1	16	2	1	2
Human	O75976	no	FANEYPNITR	FAN[115]EYPN[115]ITR	R.FANEYPNITR.L	1	16	2	1	2
Human	O75976	no	FANEYPNITR	FANEYPN[115]ITR	R.FANEYPNITR.L	1	16	2	1	1
Human	O75976	no	GILNATISVAEINHPVTTYK	GILN[115]ATISVAEINHPVTTYK	R.GILNATISVAEINHPVTTYK.T	1	16	2	1	1
Human	O75976	no	GINHNITTGR	GINHN[115]ITTGR	A.GINHNITTGR.F	0.99	16	1	1	1
Human	O75976	no	GKDLDTDFTNNASQPETK	GKDLDTDFTNN[115]ASQPETK	R.GKDLDTDFTNNASQPETK.A	1	16	2	1	1
Human	O75976	no	GKDLDTDFTNNASQPETK	GKDLDTDFTN[115]NASQPETK	R.GKDLDTDFTNNASQPETK.A	1	16	2	0	1
Human	O75976	no	GLVMNYPHITNLTNLGQSTEYR	GLVMNYPHITN[115]LTNLGQSTEYR	R.GLVMNYPHITNLTNLGQSTEYR.H	1	16	2	1	1
Human	O75976	no	HIWSLEISNKPNVSEPEEPK	HIWSLEISNKPN[115]VSEPEEPK	R.HIWSLEISNKPNVSEPEEPK.I	1	16	2	1	1
Human	O75976	no	ITNLTNLGQSTEYR	ITN[115]LTNLGQSTEYR	H.ITNLTNLGQSTEYR.H	1	16	1	1	1
Human	O75976	no	LLNTTDVYLLPSLNPDGFER	LLN[115]TTDVYLLPSLNPDGFER	R.LLNTTDVYLLPSLNPDGFER.A	1	16	2	1	1
Human	O75976	no	NNSNNFDLNR	N[115]NSNNFDLNR	R.NNSNNFDLNR.N	1	16	2	1	1
Human	O75976	no	SEGAIQVNFTLVR	SEGAIQVN[115]FTLVR	K.SEGAIQVNFTLVR.S	1	16	2	1	1
Human	O76021	no	EINDCIGGTVLNISK	EINDCIGGTVLN[115]ISK	R.EINDCIGGTVLNISK.S	1	1	2	1	1
Human	O76082	no	IANFSALGLEPGR	IAN[115]FSALGLEPGR	T.IANFSALGLEPGR.D	1	6	1	1	1
Human	O76082	no	LATIANFSALGLEPGR	LATIAN[115]FSALGLEPGR	R.LATIANFSALGLEPGR.D	1	6	2	1	1
Human	O76082	no	NFSALGLEPGR	N[115]FSALGLEPGR	A.NFSALGLEPGR.D	0.98	6	1	1	1
Human	O76082	no	NHTVPLR	N[115]HTVPLR	R.NHTVPLR.L	1	6	2	1	1
Human	O76082	no	PDAANLSSAWR	PDAAN[115]LSSAWR	V.PDAANLSSAWR.N	1	6	1	1	1
Human	O76082	no	VPDAANLSSAWR	VPDAAN[115]LSSAWR	R.VPDAANLSSAWR.N	1	6	2	1	1
Human	O94813	no	DLEVLTLNNNNITR	DLEVLTLNNNN[115]ITR	R.DLEVLTLNNNNITR.L	1	7	2	1	1
Human	O94813	no	DLEVLTLNNNNITR	DLEVLTLNNN[115]NITR	R.DLEVLTLNNNNITR.L	1	7	2	0	1
Human	O94813	no	ITCVGNDSFIGLSSVR	ITCVGN[115]DSFIGLSSVR	R.ITCVGNDSFIGLSSVR.L	1	7	2	1	1
Human	O94813	no	LDLNGNNITR	LDLN[115]GN[115]N[115]ITR	R.LDLNGNNITR.I	1	7	2	1	3
Human	O94813	no	LDLNGNNITR	LDLN[115]GNN[115]ITR	R.LDLNGNNITR.I	1	7	2	1	2
Human	O94813	no	LDLNGNNITR	LDLNGNN[115]ITR	R.LDLNGNNITR.I	1	7	2	1	1
Human	O94813	no	LDLNGNNITR	LDLN[115]GN[115]NITR	R.LDLNGNNITR.I	1	7	2	0	2
Human	O94856	no	EAWNNVTVWGSR	EAWNN[115]VTVWGSR	R.EAWNNVTVWGSR.Y	1	5	2	1	1
Human	O94856	no	NGQGSNLDGGNYHVYENGSLEIK	NGQGSNLDGGNYHVYEN[115]GSLEIK	K.NGQGSNLDGGNYHVYENGSLEIK.M	1	5	2	1	1
Human	O94856	no	QIVENFSPNQTK	QIVEN[115]FSPN[115]QTK	K.QIVENFSPNQTK.F	1	5	2	2	2
Human	O94856	no	QIVENFSPNQTK	QIVENFSPN[115]QTK	K.QIVENFSPNQTK.F	1	5	2	1	1
Human	O94856	no	YVAFNGTK	YVAFN[115]GTK	K.YVAFNGTK.V	1	5	2	1	1
Human	O94886	no	DRPNDSYCYNSAK	DRPN[115]DSYCYNSAK	G.DRPNDSYCYNSAK.N	1	3	1	1	1
Human	O94886	no	LGDRPNDSYCYNSAK	LGDRPN[115]DSYCYNSAK	G.LGDRPNDSYCYNSAK.N	1	3	1	1	1
Human	O94886	no	LGLGDRPNDSYCYNSAK	LGLGDRPN[115]DSYCYNSAK	Q.LGLGDRPNDSYCYNSAK.N	1	3	1	1	1
Human	O94901	no	NVTHHVSVTK	N[115]VTHHVSVTK	R.NVTHHVSVTK.Q	1	2	2	1	1
Human	O94901	no	TLSPTGNISSAPK	TLSPTGN[115]ISSAPK	K.TLSPTGNISSAPK.D	1	2	2	1	1
Human	O94911	no	FSVVYTPVTNTTQQIMNK	FSVVYTPVTN[115]TTQQIMNK	R.FSVVYTPVTNTTQQIMNK.V	1	2	2	1	1
Human	O94911	no	VDTFNESR	VDTFN[115]ESR	R.VDTFNESR.F	1	2	2	1	1
Human	O94923	no	GFLDNITISTTAH	GFLDN[115]ITISTTAH	K.GFLDNITISTTAH.M	1	3	1	1	1
Human	O94923	no	NLTEKPPHIEVYETAEDR	N[115]LTEKPPHIEVYETAEDR	K.NLTEKPPHIEVYETAEDR.D	1	3	2	1	1
Human	O94923	no	NLTEKPPHIEVYETAEDRDK	N[115]LTEKPPHIEVYETAEDRDK	K.NLTEKPPHIEVYETAEDRDK.N	1	3	2	1	1
Human	O94933	no	ENHSNYR	EN[115]HSN[115]YR	K.ENHSNYR.T	0.99	1	2	1	2
Human	O95084	no	GANDSTSAMPEQMK	GAN[115]DSTSAMPEQMK	R.GANDSTSAMPEQMK.F	1	1	2	1	1
Human	O95136	no	QEHYNYTK	QEHYN[115]YTK	V.QEHYNYTK.E	0.97	2	1	1	1
Human	O95136	no	VQEHYNYTK	VQEHYN[115]YTK	K.VQEHYNYTK.E	1	2	2	1	1
Human	O95158	no	HNSSSLGNLSVSIVPPSK	HN[115]SSSLGN[115]LSVSIVPPSK	R.HNSSSLGNLSVSIVPPSK.R	1	1	2	2	2
Human	O95183	no	SDQLLDMSSTFNK	SDQLLDMSSTFN[115]K	R.SDQLLDMSSTFNK.T	1	1	2	1	1
Human	O95185	no	LSDTANYTCVAK	LSDTAN[115]YTCVAK	R.LSDTANYTCVAK.N	1	1	2	1	1
Human	O95196	no	DLASSENGTECR	DLASSEN[115]GTECR	R.DLASSENGTECR.S	1	2	2	1	1
Human	O95196	no	GSPAWEPPANDTR	GSPAWEPPAN[115]DTR	K.GSPAWEPPANDTR.E	1	2	2	1	1
Human	O95274	no	AANVTVSLPVR	AAN[115]VTVSLPVR	T.AANVTVSLPVR.G	0.98	6	1	1	1
Human	O95274	no	ALDPAGNESAYPPNGVECY	ALDPAGN[115]ESAYPPN[115]GVECY	R.ALDPAGNESAYPPNGVECY.S	0.99	6	1	1	2
Human	O95274	no	ALDPAGNESAYPPNGVECYSCVGLSR	ALDPAGN[115]ESAYPPNGVECYSCVGLSR	R.ALDPAGNESAYPPNGVECYSCVGLSR.E	0.91	6	2	1	1
Human	O95274	no	EACQGTSPPVVSCYNASDHVYK	EACQGTSPPVVSCYN[115]ASDHVYK	R.EACQGTSPPVVSCYNASDHVYK.G	1	6	2	1	1
Human	O95274	no	GCFDGNVTLTAANVTVSLPVR	GCFDGN[115]VTLTAAN[115]VTVSLPVR	K.GCFDGNVTLTAANVTVSLPVR.G	1	6	2	2	2
Human	O95274	no	PPVVSCYNASDHVYK	PPVVSCYN[115]ASDHVYK	S.PPVVSCYNASDHVYK.G	0.99	6	1	1	1
Human	O95297	no	DASINIENMQFIHNGTYICDVK	DASINIEN[115]MQFIHN[115]GTYICDVK	K.DASINIENMQFIHNGTYICDVK.N	1	8	2	1	2
Human	O95297	no	DASINIENMQFIHNGTYICDVK	DASINIENMQFIHN[115]GTYICDVK	K.DASINIENMQFIHNGTYICDVK.N	1	8	2	1	1
Human	O95297	no	EIFVANGTQGK	EIFVAN[115]GTQGK	K.EIFVANGTQGK.L	1	8	2	1	1
Human	O95297	no	FIHNGTYICDVK	FIHN[115]GTYICDVK	Q.FIHNGTYICDVK.N	1	8	1	1	1
Human	O95297	no	FVANGTQGK	FVAN[115]GTQGK	I.FVANGTQGK.L	0.99	8	1	1	1
Human	O95297	no	IFVANGTQGK	IFVAN[115]GTQGK	E.IFVANGTQGK.L	1	8	1	1	1
Human	O95297	no	IHNGTYICDVK	IHN[115]GTYICDVK	F.IHNGTYICDVK.N	1	8	1	1	1
Human	O95297	no	LEVYTPKEIFVANGTQGK	LEVYTPKEIFVAN[115]GTQGK	A.LEVYTPKEIFVANGTQGK.L	1	8	1	1	1
Human	O95302	no	TYNIVLGSGQVVLGMDMGLR	TYN[115]IVLGSGQVVLGMDMGLR	K.TYNIVLGSGQVVLGMDMGLR.E	1	3	2	0	1
Human	O95302	no	YHYNGTFLDGTLFDSSHNR	YHYN[115]GTFLDGTLFDSSHNR	R.YHYNGTFLDGTLFDSSHNR.M	1	3	2	1	1
Human	O95302	no	YHYNGTLLDGTLFDSSYSR	YHYN[115]GTLLDGTLFDSSYSR	R.YHYNGTLLDGTLFDSSYSR.N	1	3	2	1	1
Human	O95427	no	ENPVEFDSLFNESK	ENPVEFDSLFN[115]ESK	K.ENPVEFDSLFNESK.Y	1	1	2	1	1
Human	O95477	no	EAFNETNQAIR	EAFN[115]ETNQAIR	R.EAFNETNQAIR.T	1	7	2	1	1
Human	O95477	no	HPEDVQSSNGSVY	HPEDVQSSN[115]GSVY	K.HPEDVQSSNGSVY.T	1	7	1	1	1
Human	O95477	no	HPEDVQSSNGSVYTWR	HPEDVQSSN[115]GSVYTWR	K.HPEDVQSSNGSVYTWR.E	1	7	2	1	1
Human	O95477	no	LEPIATEVWLINK	LEPIATEVWLIN[115]K	K.LEPIATEVWLINK.S	1	7	2	1	1
Human	O95477	no	LQDFLVDNETFSGFLYHNLSLPK	LQDFLVDN[115]ETFSGFLYHN[115]LSLPK	K.LQDFLVDNETFSGFLYHNLSLPK.S	1	7	2	2	2
Human	O95477	no	PEDVQSSNGSVYTWR	PEDVQSSN[115]GSVYTWR	H.PEDVQSSNGSVYTWR.E	1	7	1	1	1
Human	O95477	no	TLNSTSPFPSK	TLN[115]STSPFPSK	R.TLNSTSPFPSK.E	1	7	2	1	1
Human	O95490	no	GPDLSNCTSH	GPDLSN[115]CTSH	K.GPDLSNCTSH.W	0.97	7	1	1	1
Human	O95490	no	GPDLSNCTSHWVN	GPDLSN[115]CTSHWVN	K.GPDLSNCTSHWVN.Q	1	7	1	1	1
Human	O95490	no	GPDLSNCTSHWVNQLAQK	GPDLSN[115]CTSHWVNQLAQK	K.GPDLSNCTSHWVNQLAQK.I	1	7	2	1	1
Human	O95490	no	NANCSFWNYSER	NAN[115]CSFWN[115]YSER	F.NANCSFWNYSER.S	1	7	1	2	2
Human	O95490	no	NSTIAVNSHVISVSINK	N[115]STIAVNSHVISVSINK	R.NSTIAVNSHVISVSINK.E	1	7	2	1	1
Human	O95490	no	SLGQFLSTENATIK	SLGQFLSTEN[115]ATIK	R.SLGQFLSTENATIK.L	1	7	2	1	1
Human	O95490	no	SVYQDNESETGK	SVYQDN[115]ESETGK	R.SVYQDNESETGK.N	1	7	2	1	1
Human	O95497	no	AAILPNATLTPVSR	AAILPN[115]ATLTPVSR	H.AAILPNATLTPVSR.E	1	6	1	1	1
Human	O95497	no	ILPNATLTPVSR	ILPN[115]ATLTPVSR	A.ILPNATLTPVSR.E	1	6	1	1	1
Human	O95497	no	LTGVAGNYTVCQK	LTGVAGN[115]YTVCQK	K.LTGVAGNYTVCQK.D	1	6	2	1	1
Human	O95497	no	MTGSGIYAPNSSR	MTGSGIYAPN[115]SSR	K.MTGSGIYAPNSSR.A	1	6	2	1	1
Human	O95497	no	TGSGIYAPNSSR	TGSGIYAPN[115]SSR	M.TGSGIYAPNSSR.A	0.95	6	1	1	1
Human	O95497	no	VYEHAAILPNATLTPVSR	VYEHAAILPN[115]ATLTPVSR	A.VYEHAAILPNATLTPVSR.E	0.97	6	1	1	1
Human	O95498	no	TTNLTTCGR	TTN[115]LTTCGR	K.TTNLTTCGR.P	1	2	2	1	1
Human	O95498	no	TTNLTTCGRPVETASTR	TTN[115]LTTCGRPVETASTR	K.TTNLTTCGRPVETASTR.F	1	2	2	1	1
Human	O95754	no	TEVTQVNTTNCGR	TEVTQVN[115]TTNCGR	R.TEVTQVNTTNCGR.L	1	1	2	1	1
Human	O95841	no	ILNVTTEMLK	ILN[115]VTTEMLK	K.ILNVTTEMLK.M	1	1	2	1	1
Human	O95857	no	NPNDTCLASCVK	NPN[115]DTCLASCVK	V.NPNDTCLASCVK.S	1	4	1	1	1
Human	O95857	no	PNDTCLASCVK	PN[115]DTCLASCVK	N.PNDTCLASCVK.S	1	4	1	1	1
Human	O95857	no	SVNPNDTCLASCVK	SVN[115]PN[115]DTCLASCVK	R.SVNPNDTCLASCVK.S	1	4	2	1	2
Human	O95857	no	SVNPNDTCLASCVK	SVNPN[115]DTCLASCVK	R.SVNPNDTCLASCVK.S	1	4	2	1	1
Human	O95858	no	NTTEVVNTMCGYK	N[115]TTEVVN[115]TMCGYK	R.NTTEVVNTMCGYK.T	1	2	2	1	2
Human	O95858	no	NTTEVVNTMCGYK	N[115]TTEVVNTMCGYK	R.NTTEVVNTMCGYK.T	1	2	2	1	1
Human	O95866	no	NLSCGGVSHPIR	N[115]LSCGGVSHPIR	V.NLSCGGVSHPIR.W	1	3	1	1	1
Human	O95866	no	VNLSCGGVSHPI	VN[115]LSCGGVSHPI	R.VNLSCGGVSHPI.R	1	3	1	1	1
Human	O95866	no	VNLSCGGVSHPIR	VN[115]LSCGGVSHPIR	R.VNLSCGGVSHPIR.W	1	3	2	1	1
Human	O95971	CD160	FTETGNYTVTGLK	FTETGN[115]YTVTGLK	L.FTETGNYTVTGLK.Q	1	5	1	1	1
Human	O95971	CD160	GNYTVTGLK	GN[115]YTVTGLK	T.GNYTVTGLK.Q	0.99	5	1	1	1
Human	O95971	CD160	INITSSASQEGTR	IN[115]ITSSASQEGTR	C.INITSSASQEGTR.L	1	5	1	1	1
Human	O95971	CD160	SILFTETGNYTVTGLK	SILFTETGN[115]YTVTGLK	F.SILFTETGNYTVTGLK.Q	1	5	1	1	1
Human	O95971	CD160	TETGNYTVTGLK	TETGN[115]YTVTGLK	F.TETGNYTVTGLK.Q	0.99	5	1	1	1
Human	O95977	no	IVLHYNHSGR	IVLHYN[115]HSGR	L.IVLHYNHSGR.L	1	4	1	1	1
Human	O95977	no	LHYNHSGR	LHYN[115]HSGR	V.LHYNHSGR.L	1	4	1	1	1
Human	O95977	no	LIVLHYNHSGR	LIVLHYN[115]HSGR	R.LIVLHYNHSGR.L	1	4	2	1	1
Human	O95977	no	VLHYNHSGR	VLHYN[115]HSGR	I.VLHYNHSGR.L	1	4	1	1	1
Human	O95980	no	GGLAPGSAGALCCNHSK	GGLAPGSAGALCCN[115]HSK	A.GGLAPGSAGALCCNHSK.D	1	2	1	1	1
Human	O95980	no	NLTYCTNFNNRPTELFR	N[115]LTYCTNFNNRPTELFR	R.NLTYCTNFNNRPTELFR.S	1	2	2	1	1
Human	O96005	no	AEDYGPVEVISHWHPNITIN	AEDYGPVEVISHWHPN[115]ITIN	R.AEDYGPVEVISHWHPNITIN.I	1	5	1	1	1
Human	O96005	no	DYYPINESLASLPLR	DYYPIN[115]ESLASLPLR	K.DYYPINESLASLPLR.V	1	5	2	1	1
Human	O96005	no	PINESLASLPLR	PIN[115]ESLASLPLR	Y.PINESLASLPLR.V	1	5	1	1	1
Human	O96005	no	YPINESLASLPLR	YPIN[115]ESLASLPLR	Y.YPINESLASLPLR.V	1	5	1	1	1
Human	O96005	no	YYPINESLASLPLR	YYPIN[115]ESLASLPLR	D.YYPINESLASLPLR.V	1	5	1	1	1
Human	O96014	no	TPSALALNQTQH	TPSALALN[115]QTQH	K.TPSALALNQTQH.C	1	1	1	1	1
Human	P00450	no	EHEGAIYPDNTTDFQR	EHEGAIYPDN[115]TTDFQR	K.EHEGAIYPDNTTDFQR.A	1	5	2	1	1
Human	P00450	no	ELHHLQEQNVSNAFLDK	ELHHLQEQN[115]VSNAFLDK	K.ELHHLQEQNVSNAFLDK.G	1	5	2	1	1
Human	P00450	no	ELHHLQEQNVSNAFLDKGEFYIGSK	ELHHLQEQN[115]VSNAFLDKGEFYIGSK	K.ELHHLQEQNVSNAFLDKGEFYIGSK.Y	1	5	2	1	1
Human	P00450	no	ELHHLQEQNVSNAFLDKGEFYIGSK	ELHHLQEQNVSN[115]AFLDKGEFYIGSK	K.ELHHLQEQNVSNAFLDKGEFYIGSK.Y	1	5	2	0	1
Human	P00450	no	ENLTAPGSDSAVFFEQGTTR	EN[115]LTAPGSDSAVFFEQGTTR	K.ENLTAPGSDSAVFFEQGTTR.I	1	5	2	1	1
Human	P00488	no	YTITAYLSANITFYTGVPK	YTITAYLSAN[115]ITFYTGVPK	R.YTITAYLSANITFYTGVPK.A	1	1	2	1	1
Human	P00533	no	ALAVLSNYDANK	ALAVLSNYDAN[115]K	Y.ALAVLSNYDANK.T	1	53	1	1	1
Human	P00533	no	AMNITCTGR	AMN[115]ITCTGR	Q.AMNITCTGR.G	1	53	1	1	1
Human	P00533	no	AVVSLNITSLGLR	AVVSLN[115]ITSLGLR	L.AVVSLNITSLGLR.S	1	53	1	1	1
Human	P00533	no	CDPSCPNGSCWGAGEENCQK	CDPSCPN[115]GSCWGAGEENCQK	K.CDPSCPNGSCWGAGEENCQK.L	1	53	2	1	1
Human	P00533	no	DIVSSDFLSNMSMDFQNH	DIVSSDFLSN[115]MSMDFQNH	R.DIVSSDFLSNMSMDFQNH.L	1	53	1	1	1
Human	P00533	no	DIVSSDFLSNMSMDFQNHLGSCQK	DIVSSDFLSN[115]MSMDFQNHLGSCQK	R.DIVSSDFLSNMSMDFQNHLGSCQK.C	1	53	2	1	1
Human	P00533	no	DIVSSDFLSNMSMDFQNHLGSCQK	DIVSSDFLSN[115]MSMDFQN[115]HLGSCQK	R.DIVSSDFLSNMSMDFQNHLGSCQK.C	1	53	2	1	2
Human	P00533	no	DIVSSDFLSNMSMDFQNHLGSCQK	DIVSSDFLSNMSMDFQN[115]HLGSCQK	R.DIVSSDFLSNMSMDFQNHLGSCQK.C	1	53	2	0	1
Human	P00533	no	DSLSINATNIK	DSLSIN[115]ATNIK	K.DSLSINATNIK.H	1	53	2	1	1
Human	P00533	no	EFVENSECIQCHPECLPQAMNITCTGR	EFVEN[115]SECIQCHPECLPQAMN[115]ITCTGR	R.EFVENSECIQCHPECLPQAMNITCTGR.G	1	53	2	1	2
Human	P00533	no	EFVENSECIQCHPECLPQAMNITCTGR	EFVENSECIQCHPECLPQAMN[115]ITCTGR	R.EFVENSECIQCHPECLPQAMNITCTGR.G	1	53	2	1	1
Human	P00533	no	EITGFLLIQAWPENR	EITGFLLIQAWPEN[115]R	K.EITGFLLIQAWPENR.T	1	53	2	1	1
Human	P00533	no	FVENSECIQCHPECLPQAMNITCTGR	FVENSECIQCHPECLPQAMN[115]ITCTGR	E.FVENSECIQCHPECLPQAMNITCTGR.G	1	53	1	1	1
Human	P00533	no	GNMYYENSYALAVLSNYDANK	GNMYYENSYALAVLSNYDAN[115]K	R.GNMYYENSYALAVLSNYDANK.T	1	53	2	1	1
Human	P00533	no	GNMYYENSYALAVLSNYDANKTGLK	GNMYYEN[115]SYALAVLSNYDAN[115]KTGLK	R.GNMYYENSYALAVLSNYDANKTGLK.E	1	53	2	1	2
Human	P00533	no	GNMYYENSYALAVLSNYDANKTGLK	GNMYYENSYALAVLSNYDAN[115]KTGLK	R.GNMYYENSYALAVLSNYDANKTGLK.E	1	53	2	1	1
Human	P00533	no	GNMYYENSYALAVLSNYDANKTGLKELPMR	GNMYYENSYALAVLSNYDAN[115]KTGLKELPMR	R.GNMYYENSYALAVLSNYDANKTGLKELPMR.N	1	53	2	1	1
Human	P00533	no	IQAWPENR	IQAWPEN[115]R	L.IQAWPENR.T	0.99	53	1	1	1
Human	P00533	no	IQCHPECLPQAMNITCTGR	IQCHPECLPQAMN[115]ITCTGR	C.IQCHPECLPQAMNITCTGR.G	1	53	1	1	1
Human	P00533	no	ITGFLLIQAWPENR	ITGFLLIQAWPEN[115]R	E.ITGFLLIQAWPENR.T	0.93	53	1	1	1
Human	P00533	no	LCHPNCTYGCTGPGLEGCPTNGPK	LCHPN[115]CTYGCTGPGLEGCPTN[115]GPK	H.LCHPNCTYGCTGPGLEGCPTNGPK.I	1	53	1	1	2
Human	P00533	no	LCHPNCTYGCTGPGLEGCPTNGPK	LCHPN[115]CTYGCTGPGLEGCPTNGPK	H.LCHPNCTYGCTGPGLEGCPTNGPK.I	1	53	1	1	1
Human	P00533	no	LIQAWPENR	LIQAWPEN[115]R	L.LIQAWPENR.T	0.98	53	1	1	1
Human	P00533	no	LLIQAWPENR	LLIQAWPEN[115]R	F.LLIQAWPENR.T	1	53	1	1	1
Human	P00533	no	LNITSLGLR	LN[115]ITSLGLR	S.LNITSLGLR.S	1	53	1	1	1
Human	P00533	no	LPQAMNITCTGR	LPQAMN[115]ITCTGR	C.LPQAMNITCTGR.G	1	53	1	1	1
Human	P00533	no	LSINATNIK	LSIN[115]ATNIK	S.LSINATNIK.H	0.99	53	1	1	1
Human	P00533	no	MFNNCEVVLGNLEITYVQR	MFNN[115]CEVVLGNLEITYVQR	R.MFNNCEVVLGNLEITYVQR.N	0.99	53	2	0	1
Human	P00533	no	MFNNCEVVLGNLEITYVQR	MFN[115]NCEVVLGN[115]LEITYVQR	R.MFNNCEVVLGNLEITYVQR.N	1	53	2	0	2
Human	P00533	no	MFNNCEVVLGNLEITYVQR	MFN[115]NCEVVLGNLEITYVQR	R.MFNNCEVVLGNLEITYVQR.N	1	53	2	0	1
Human	P00533	no	NCTSISGDLHIL	N[115]CTSISGDLHIL	K.NCTSISGDLHIL.P	0.99	53	1	1	1
Human	P00533	no	NCTSISGDLHILPVAF	N[115]CTSISGDLHILPVAF	K.NCTSISGDLHILPVAF.R	0.96	53	1	1	1
Human	P00533	no	NCTSISGDLHILPVAFR	N[115]CTSISGDLHILPVAFR	K.NCTSISGDLHILPVAFR.G	1	53	2	1	1
Human	P00533	no	PAGVMGENNTLVWK	PAGVMGEN[115]NTLVWK	C.PAGVMGENNTLVWK.Y	1	53	1	1	1
Human	P00533	no	PAGVMGENNTLVWK	PAGVMGENN[115]TLVWK	C.PAGVMGENNTLVWK.Y	1	53	1	0	1
Human	P00533	no	QHGQFSLAVVSLNITSLGLR	QHGQFSLAVVSLN[115]ITSLGLR	K.QHGQFSLAVVSLNITSLGLR.S	1	53	2	1	1
Human	P00533	no	SECIQCHPECLPQAMNITCTGR	SECIQCHPECLPQAMN[115]ITCTGR	N.SECIQCHPECLPQAMNITCTGR.G	1	53	1	1	1
Human	P00533	no	SLAVVSLNITSLGLR	SLAVVSLN[115]ITSLGLR	F.SLAVVSLNITSLGLR.S	1	53	1	1	1
Human	P00533	no	SLNITSLGLR	SLN[115]ITSLGLR	V.SLNITSLGLR.S	1	53	1	1	1
Human	P00533	no	SLSINATNIK	SLSIN[115]ATNIK	D.SLSINATNIK.H	1	53	1	1	1
Human	P00533	no	SNYDANKTGLK	SNYDAN[115]KTGLK	L.SNYDANKTGLK.E	1	53	1	1	1
Human	P00533	no	TCPAGVMGENNTLVWK	TCPAGVMGEN[115]NTLVWK	K.TCPAGVMGENNTLVWK.Y	1	53	2	1	1
Human	P00533	no	TCPAGVMGENNTLVWK	TCPAGVMGENN[115]TLVWK	K.TCPAGVMGENNTLVWK.Y	1	53	2	0	1
Human	P00533	no	TCPAGVMGENNTLVWK	TCPAGVMGEN[115]N[115]TLVWK	K.TCPAGVMGENNTLVWK.Y	1	53	2	0	2
Human	P00533	no	TCPAGVMGENNTLVWKY	TCPAGVMGEN[115]NTLVWKY	K.TCPAGVMGENNTLVWKY.A	0.96	53	1	1	1
Human	P00533	no	TGFLLIQAWPENR	TGFLLIQAWPEN[115]R	I.TGFLLIQAWPENR.T	0.99	53	1	1	1
Human	P00533	no	TKQHGQFSLAVVSLNITSLGLR	TKQHGQFSLAVVSLN[115]ITSLGLR	R.TKQHGQFSLAVVSLNITSLGLR.S	0.95	53	2	1	1
Human	P00533	no	TVKEITGFLLIQAWPENR	TVKEITGFLLIQAWPEN[115]R	K.TVKEITGFLLIQAWPENR.T	0.94	53	2	1	1
Human	P00533	no	VSLNITSLGLR	VSLN[115]ITSLGLR	V.VSLNITSLGLR.S	1	53	1	1	1
Human	P00533	no	VVSLNITSLGLR	VVSLN[115]ITSLGLR	A.VVSLNITSLGLR.S	1	53	1	1	1
Human	P00533	no	YADAGHVCHLCHPNCTYGC	YADAGHVCHLCHPN[115]CTYGC	K.YADAGHVCHLCHPNCTYGC.T	1	53	1	1	1
Human	P00533	no	YADAGHVCHLCHPNCTYGCTGPGLEGCPTNGPK	YADAGHVCHLCHPN[115]CTYGCTGPGLEGCPTNGPK	K.YADAGHVCHLCHPNCTYGCTGPGLEGCPTNGPK.I	1	53	2	1	1
Human	P00533	no	YADAGHVCHLCHPNCTYGCTGPGLEGCPTNGPK	YADAGHVCHLCHPN[115]CTYGCTGPGLEGCPTN[115]GPK	K.YADAGHVCHLCHPNCTYGCTGPGLEGCPTNGPK.I	1	53	2	1	2
Human	P00734	no	GHVNITR	GHVN[115]ITR	R.GHVNITR.S	1	1	2	1	1
Human	P00738	no	FLNHSENATAK	FLN[115]HSEN[115]ATAK	L.FLNHSENATAK.D	1	7	1	2	2
Human	P00738	no	LFLNHSENATAK	LFLN[115]HSEN[115]ATAK	N.LFLNHSENATAK.D	0.98	7	1	2	2
Human	P00738	no	LNHSENATAK	LN[115]HSEN[115]ATAK	F.LNHSENATAK.D	0.97	7	1	2	2
Human	P00738	no	NLFLNHSENA	NLFLN[115]HSEN[115]A	K.NLFLNHSENA.T	0.95	7	1	1	2
Human	P00738	no	NLFLNHSENATAK	N[115]LFLN[115]HSEN[115]ATAK	K.NLFLNHSENATAK.D	1	7	2	2	3
Human	P00738	no	NLFLNHSENATAK	NLFLN[115]HSEN[115]ATAK	K.NLFLNHSENATAK.D	1	7	2	2	2
Human	P00738	no	VVLHPNYSQVDIGLIK	VVLHPN[115]YSQVDIGLIK	K.VVLHPNYSQVDIGLIK.L	1	7	2	1	1
Human	P00749	no	ENSTDYLYPEQLK	EN[115]STDYLYPEQLK	K.ENSTDYLYPEQLK.M	1	1	2	1	1
Human	P00750	no	CTSQHLLNR	CTSQHLLN[115]R	R.CTSQHLLNR.T	1	2	2	1	1
Human	P00750	no	GTWSTAESGAECTNWNSSALAQKPYSGR	GTWSTAESGAECTNWN[115]SSALAQKPYSGR	R.GTWSTAESGAECTNWNSSALAQKPYSGR.R	1	2	2	1	1
Human	P01009	no	YLGNATAIFFLPDEGK	YLGN[115]ATAIFFLPDEGK	K.YLGNATAIFFLPDEGK.L	1	1	2	1	1
Human	P01011	no	TLNQSSDELQLSMGNAMFVK	TLN[115]QSSDELQLSMGNAMFVK	R.TLNQSSDELQLSMGNAMFVK.E	1	1	2	1	1
Human	P01023	no	GNEANYYSNATTDEHGLVQFSINTTNVMGTSLTVR	GNEANYYSN[115]ATTDEHGLVQFSIN[115]TTNVMGTSLTVR	R.GNEANYYSNATTDEHGLVQFSINTTNVMGTSLTVR.V	1	1	2	2	2
Human	P01024	no	TVLTPATNHMGNVTFTIPANR	TVLTPATNHMGN[115]VTFTIPANR	K.TVLTPATNHMGNVTFTIPANR.E	1	2	2	1	1
Human	P01024	no	TVLTPATNHMGNVTFTIPANR	TVLTPATN[115]HMGNVTFTIPANR	K.TVLTPATNHMGNVTFTIPANR.E	1	2	2	0	1
Human	P01033	no	FVGTPEVNQTTLYQR	FVGTPEVN[115]QTTLYQR	K.FVGTPEVNQTTLYQR.Y	1	1	2	1	1
Human	P01042	no	ITYSIVQTNCSK	ITYSIVQTN[115]CSK	R.ITYSIVQTNCSK.E	1	3	2	1	1
Human	P01042	no	LNAENNATFYFK	LNAENN[115]ATFYFK	K.LNAENNATFYFK.I	1	3	2	1	1
Human	P01042	no	LNAENNATFYFK	LNAEN[115]NATFYFK	K.LNAENNATFYFK.I	1	3	2	0	1
Human	P01130	no	DMSDEVGCVNVTLCEGPNK	DMSDEVGCVN[115]VTLCEGPNK	K.DMSDEVGCVNVTLCEGPNK.F	1	3	2	1	1
Human	P01130	no	LTGSDVNLLAENLLSPEDMVLFHNLTQPR	LTGSDVNLLAENLLSPEDMVLFHN[115]LTQPR	R.LTGSDVNLLAENLLSPEDMVLFHNLTQPR.G	1	3	2	1	1
Human	P01130	no	TTLSNGGCQYLCLPAPQINPHSPK	TTLSN[115]GGCQYLCLPAPQINPHSPK	R.TTLSNGGCQYLCLPAPQINPHSPK.F	1	3	2	0	1
Human	P01137	no	FFNTSELR	FFN[115]TSELR	M.FFNTSELR.E	0.99	5	1	1	1
Human	P01137	no	LASPPSQGEVPPGPLPEAVLALYNSTR	LASPPSQGEVPPGPLPEAVLALYN[115]STR	R.LASPPSQGEVPPGPLPEAVLALYNSTR.D	1	5	2	1	1
Human	P01137	no	MFFNTSELR	MFFN[115]TSELR	Y.MFFNTSELR.E	1	5	1	1	1
Human	P01137	no	QSTHSIYMFFNTSELR	QSTHSIYMFFN[115]TSELR	K.QSTHSIYMFFNTSELR.E	1	5	2	1	1
Human	P01137	no	YSNNSWR	YSN[115]NSWR	K.YSNNSWR.Y	1	5	2	1	1
Human	P01589	CD25	MLCTGNSSHSSWDNQCQCTSSATR	MLCTGN[115]SSHSSWDNQCQCTSSATR	Y.MLCTGNSSHSSWDNQCQCTSSATR.N	1	3	1	1	1
Human	P01589	CD25	SGSLYMLCTGNSSH	SGSLYMLCTGN[115]SSH	K.SGSLYMLCTGNSSH.S	1	3	1	1	1
Human	P01589	CD25	SGSLYMLCTGNSSHSSWDNQCQCTSSATR	SGSLYMLCTGN[115]SSHSSWDNQCQCTSSATR	K.SGSLYMLCTGNSSHSSWDNQCQCTSSATR.N	1	3	2	1	1
Human	P01730	CD4	AGSGNLTLALEAK	AGSGN[115]LTLALEAK	Y.AGSGNLTLALEAK.T	1	6	1	1	1
Human	P01730	CD4	ALPQYAGSGNLTLALEAK	ALPQYAGSGN[115]LTLALEAK	Q.ALPQYAGSGNLTLALEAK.T	1	6	1	1	1
Human	P01730	CD4	GSGNLTLALEAK	GSGN[115]LTLALEAK	A.GSGNLTLALEAK.T	1	6	1	1	1
Human	P01730	CD4	NLTCEVWGPTSPK	N[115]LTCEVWGPTSPK	K.NLTCEVWGPTSPK.L	1	6	2	1	1
Human	P01730	CD4	SGNLTLALEAK	SGN[115]LTLALEAK	G.SGNLTLALEAK.T	1	6	1	1	1
Human	P01730	CD4	YAGSGNLTLALEAK	YAGSGN[115]LTLALEAK	Q.YAGSGNLTLALEAK.T	1	6	1	1	1
Human	P01733	no	MPNASFSTLK	MPN[115]ASFSTLK	K.MPNASFSTLK.I	1	2	2	1	1
Human	P01733	no	PNASFSTLK	PN[115]ASFSTLK	M.PNASFSTLK.I	1	2	1	1	1
Human	P01737	no	AVSDLEPNSSASK	AVSDLEPN[115]SSASK	C.AVSDLEPNSSASK.I	1	4	1	1	1
Human	P01737	no	MSDAAEYFCAVSDLEPNSSASK	MSDAAEYFCAVSDLEPN[115]SSASK	H.MSDAAEYFCAVSDLEPNSSASK.I	1	4	1	1	1
Human	P01737	no	PSAHMSDAAEYFCAVSDLEPNSSASK	PSAHMSDAAEYFCAVSDLEPN[115]SSASK	K.PSAHMSDAAEYFCAVSDLEPNSSASK.I	1	4	2	1	1
Human	P01737	no	SDAAEYFCAVSDLEPNSSASK	SDAAEYFCAVSDLEPN[115]SSASK	M.SDAAEYFCAVSDLEPNSSASK.I	1	4	1	1	1
Human	P01848	no	ACANAFNNSIIPEDTFFPSPESSCDVK	ACANAFN[115]NSIIPEDTFFPSPESSCDVK	F.ACANAFNNSIIPEDTFFPSPESSCDVK.L	1	17	1	1	1
Human	P01848	no	AFNNSIIPEDTFFPSPESSCDVK	AFN[115]NSIIPEDTFFPSPESSCDVK	N.AFNNSIIPEDTFFPSPESSCDVK.L	1	17	1	1	1
Human	P01848	no	AFNNSIIPEDTFFPSPESSCDVK	AFN[115]N[115]SIIPEDTFFPSPESSCDVK	N.AFNNSIIPEDTFFPSPESSCDVK.L	1	17	1	0	2
Human	P01848	no	AFNNSIIPEDTFFPSPESSCDVK	AFNN[115]SIIPEDTFFPSPESSCDVK	N.AFNNSIIPEDTFFPSPESSCDVK.L	1	17	1	0	1
Human	P01848	no	DFDSQTNVSQSK	DFDSQTN[115]VSQSK	T.DFDSQTNVSQSK.D	1	17	1	1	1
Human	P01848	no	DSQTNVSQSK	DSQTN[115]VSQSK	F.DSQTNVSQSK.D	0.99	17	1	1	1
Human	P01848	no	FDSQTNVSQSK	FDSQTN[115]VSQSK	D.FDSQTNVSQSK.D	1	17	1	1	1
Human	P01848	no	FTDFDSQTNVSQSK	FTDFDSQTN[115]VSQSK	L.FTDFDSQTNVSQSK.D	1	17	1	1	1
Human	P01848	no	LFTDFDSQTNVSQSK	LFTDFDSQTN[115]VSQSK	C.LFTDFDSQTNVSQSK.D	1	17	1	1	1
Human	P01848	no	NAFNNSIIPEDTFFPSPESSCDVK	NAFN[115]NSIIPEDTFFPSPESSCDVK	A.NAFNNSIIPEDTFFPSPESSCDVK.L	1	17	1	1	1
Human	P01848	no	NAFNNSIIPEDTFFPSPESSCDVK	NAFNN[115]SIIPEDTFFPSPESSCDVK	A.NAFNNSIIPEDTFFPSPESSCDVK.L	1	17	1	0	1
Human	P01848	no	SDFACANAFNNSIIPEDTFFPSPESSCDVK	SDFACANAFN[115]NSIIPEDTFFPSPESSCDVK	K.SDFACANAFNNSIIPEDTFFPSPESSCDVK.L	1	17	2	1	1
Human	P01848	no	SDFACANAFNNSIIPEDTFFPSPESSCDVK	SDFACANAFNN[115]SIIPEDTFFPSPESSCDVK	K.SDFACANAFNNSIIPEDTFFPSPESSCDVK.L	1	17	2	0	1
Human	P01848	no	SNSAVAWSNK	SN[115]SAVAWSN[115]K	K.SNSAVAWSNK.S	1	17	2	1	2
Human	P01848	no	SNSAVAWSNK	SNSAVAWSN[115]K	K.SNSAVAWSNK.S	1	17	2	1	1
Human	P01848	no	SVCLFTDFDSQTNVSQSK	SVCLFTDFDSQTN[115]VSQSK	K.SVCLFTDFDSQTNVSQSK.D	1	17	2	1	1
Human	P01848	no	TDFDSQTNVSQSK	TDFDSQTN[115]VSQSK	F.TDFDSQTNVSQSK.D	1	17	1	1	1
Human	P01850	no	EQPALNDSR	EQPALN[115]DSR	K.EQPALNDSR.Y	1	11	2	1	1
Human	P01850	no	EQPALNDSRY	EQPALN[115]DSRY	K.EQPALNDSRY.C	0.98	11	1	1	1
Human	P01850	no	EVHSGVSTDPQPLKEQPALNDSR	EVHSGVSTDPQPLKEQPALN[115]DSR	K.EVHSGVSTDPQPLKEQPALNDSR.Y	1	11	2	1	1
Human	P01850	no	EVHSGVSTDPQPLKEQPALNDSRY	EVHSGVSTDPQPLKEQPALN[115]DSRY	K.EVHSGVSTDPQPLKEQPALNDSRY.C	0.91	11	1	1	1
Human	P01850	no	HSGVSTDPQPLKEQPALNDSR	HSGVSTDPQPLKEQPALN[115]DSR	V.HSGVSTDPQPLKEQPALNDSR.Y	1	11	1	1	1
Human	P01850	no	KEQPALNDSR	KEQPALN[115]DSR	L.KEQPALNDSR.Y	1	11	1	1	1
Human	P01850	no	PALNDSR	PALN[115]DSR	Q.PALNDSR.Y	1	11	1	1	1
Human	P01850	no	PLKEQPALNDSR	PLKEQPALN[115]DSR	Q.PLKEQPALNDSR.Y	1	11	1	1	1
Human	P01850	no	PQPLKEQPALNDSR	PQPLKEQPALN[115]DSR	D.PQPLKEQPALNDSR.Y	1	11	1	1	1
Human	P01850	no	SGVSTDPQPLKEQPALNDSR	SGVSTDPQPLKEQPALN[115]DSR	H.SGVSTDPQPLKEQPALNDSR.Y	1	11	1	1	1
Human	P01850	no	VSTDPQPLKEQPALNDSR	VSTDPQPLKEQPALN[115]DSR	G.VSTDPQPLKEQPALNDSR.Y	1	11	1	1	1
Human	P01857	no	EEQYNSTYR	EEQYN[115]STYR	R.EEQYNSTYR.V	1	1	2	1	1
Human	P01859	no	EEQFNSTFR	EEQFN[115]STFR	R.EEQFNSTFR.V	1	1	2	1	1
Human	P01861	no	EEQFNSTYR	EEQFN[115]STYR	R.EEQFNSTYR.V	1	1	2	1	1
Human	P01871	no	GLTFQQNASSM	GLTFQQN[115]ASSM	R.GLTFQQNASSM.C	1	30	1	1	1
Human	P01871	no	GLTFQQNASSMCVPDQDTAIR	GLTFQQN[115]ASSMCVPDQDTAIR	R.GLTFQQNASSMCVPDQDTAIR.V	1	30	2	1	1
Human	P01871	no	KNNSDISSTR	KN[115]NSDISSTR	Y.KNNSDISSTR.G	0.95	30	1	1	1
Human	P01871	no	NNSDISSTR	N[115]NSDISSTR	K.NNSDISSTR.G	1	30	2	1	1
Human	P01871	no	NNSDISSTR	NN[115]SDISSTR	K.NNSDISSTR.G	1	30	2	0	1
Human	P01871	no	THTNISESH	THTN[115]ISESH	K.THTNISESH.P	0.99	30	1	1	1
Human	P01871	no	THTNISESHPN	THTN[115]ISESHPN	K.THTNISESHPN.A	1	30	1	1	1
Human	P01871	no	THTNISESHPN	THTN[115]ISESHPN[115]	K.THTNISESHPN.A	1	30	1	1	2
Human	P01871	no	THTNISESHPNA	THTN[115]ISESHPN[115]A	K.THTNISESHPNA.T	1	30	1	1	2
Human	P01871	no	THTNISESHPNAT	THTN[115]ISESHPN[115]AT	K.THTNISESHPNAT.F	1	30	1	2	2
Human	P01871	no	THTNISESHPNAT	THTN[115]ISESHPNAT	K.THTNISESHPNAT.F	1	30	1	1	1
Human	P01871	no	THTNISESHPNATF	THTN[115]ISESHPN[115]ATF	K.THTNISESHPNATF.S	1	30	1	2	2
Human	P01871	no	THTNISESHPNATFS	THTN[115]ISESHPN[115]ATFS	K.THTNISESHPNATFS.A	1	30	1	2	2
Human	P01871	no	THTNISESHPNATFSA	THTN[115]ISESHPN[115]ATFSA	K.THTNISESHPNATFSA.V	1	30	1	2	2
Human	P01871	no	THTNISESHPNATFSAVG	THTN[115]ISESHPN[115]ATFSAVG	K.THTNISESHPNATFSAVG.E	1	30	1	2	2
Human	P01871	no	THTNISESHPNATFSAVGEA	THTN[115]ISESHPN[115]ATFSAVGEA	K.THTNISESHPNATFSAVGEA.S	1	30	1	2	2
Human	P01871	no	THTNISESHPNATFSAVGEAS	THTN[115]ISESHPN[115]ATFSAVGEAS	K.THTNISESHPNATFSAVGEAS.I	1	30	1	2	2
Human	P01871	no	THTNISESHPNATFSAVGEASICEDDWN	THTN[115]ISESHPN[115]ATFSAVGEASICEDDWN	K.THTNISESHPNATFSAVGEASICEDDWN.S	1	30	1	2	2
Human	P01871	no	THTNISESHPNATFSAVGEASICEDDWNSGER	THTN[115]ISESHPN[115]ATFSAVGEASICEDDWNSGER	K.THTNISESHPNATFSAVGEASICEDDWNSGER.F	1	30	2	2	2
Human	P01871	no	VDHRGLTFQQNASSMCVPDQDTAIR	VDHRGLTFQQN[115]ASSMCVPDQDTAIR	R.VDHRGLTFQQNASSMCVPDQDTAIR.V	1	30	2	1	1
Human	P01871	no	VQHPNGNKEKNVPLPVIAELPPK	VQHPNGN[115]KEKNVPLPVIAELPPK	K.VQHPNGNKEKNVPLPVIAELPPK.V	1	30	2	0	1
Human	P01871	no	YAATSQVLLPSKDVMQGTDEHVVCKVQHPNGNKEK	YAATSQVLLPSKDVMQGTDEHVVCKVQHPN[115]GNKEK	K.YAATSQVLLPSKDVMQGTDEHVVCKVQHPNGNKEK.N	1	30	2	0	1
Human	P01871	no	YKNNSDISSTR	YKN[115]NSDISSTR	K.YKNNSDISSTR.G	1	30	2	1	1
Human	P01871	no	YKNNSDISSTR	YKN[115]N[115]SDISSTR	K.YKNNSDISSTR.G	1	30	2	0	2
Human	P01871	no	YKNNSDISSTR	YKNN[115]SDISSTR	K.YKNNSDISSTR.G	1	30	2	0	1
Human	P01871	no	YKNNSDISSTRGFPSVLR	YKN[115]NSDISSTRGFPSVLR	K.YKNNSDISSTRGFPSVLR.G	1	30	2	1	1
Human	P01871	no	YKNNSDISSTRGFPSVLR	YKN[115]N[115]SDISSTRGFPSVLR	K.YKNNSDISSTRGFPSVLR.G	0.97	30	2	0	2
Human	P01871	no	YKNNSDISSTRGFPSVLR	YKNN[115]SDISSTRGFPSVLR	K.YKNNSDISSTRGFPSVLR.G	1	30	2	0	1
Human	P01871	no	YKNNSDISSTRGFPSVLRGGK	YKN[115]NSDISSTRGFPSVLRGGK	K.YKNNSDISSTRGFPSVLRGGK.Y	1	30	2	1	1
Human	P01871	no	YKNNSDISSTRGFPSVLRGGK	YKNN[115]SDISSTRGFPSVLRGGK	K.YKNNSDISSTRGFPSVLRGGK.Y	1	30	2	0	1
Human	P01876	no	LAGKPTHVNVSVVMAEVDGTC	LAGKPTHVN[115]VSVVMAEVDGTC	R.LAGKPTHVNVSVVMAEVDGTC.Y	1	1	1	1	1
Human	P01889	no	GYYNQSEAGSH	GYYN[115]QSEAGSH	R.GYYNQSEAGSH.T	1	8	1	1	1
Human	P01889	no	GYYNQSEAGSHT	GYYN[115]QSEAGSHT	R.GYYNQSEAGSHT.V	1	8	1	1	1
Human	P01889	no	GYYNQSEAGSHTLQS	GYYN[115]QSEAGSHTLQS	R.GYYNQSEAGSHTLQS.M	0.98	8	1	1	1
Human	P01889	no	GYYNQSEAGSHTLQSM	GYYN[115]QSEAGSHTLQSM	R.GYYNQSEAGSHTLQSM.Y	1	8	1	1	1
Human	P01889	no	GYYNQSEAGSHTLQSMY	GYYN[115]QSEAGSHTLQSMY	R.GYYNQSEAGSHTLQSMY.G	1	8	1	1	1
Human	P01889	no	GYYNQSEAGSHTLQSMYG	GYYN[115]QSEAGSHTLQSMYG	R.GYYNQSEAGSHTLQSMYG.C	1	8	1	1	1
Human	P01889	no	GYYNQSEAGSHTLQSMYGCDV	GYYN[115]QSEAGSHTLQSMYGCDV	R.GYYNQSEAGSHTLQSMYGCDV.G	1	8	1	1	1
Human	P01889	no	GYYNQSEAGSHTLQSMYGCDVGPDGR	GYYN[115]QSEAGSHTLQSMYGCDVGPDGR	R.GYYNQSEAGSHTLQSMYGCDVGPDGR.L	1	8	2	1	1
Human	P01891	no	GYYNQSEAGSH	GYYN[115]QSEAGSH	R.GYYNQSEAGSH.T	1	11	1	1	1
Human	P01891	no	GYYNQSEAGSHT	GYYN[115]QSEAGSHT	R.GYYNQSEAGSHT.V	1	11	1	1	1
Human	P01891	no	GYYNQSEAGSHTI	GYYN[115]QSEAGSHTI	R.GYYNQSEAGSHTI.Q	1	11	1	1	1
Human	P01891	no	GYYNQSEAGSHTIQ	GYYN[115]QSEAGSHTIQ	R.GYYNQSEAGSHTIQ.I	1	11	1	1	1
Human	P01891	no	GYYNQSEAGSHTIQM	GYYN[115]QSEAGSHTIQM	R.GYYNQSEAGSHTIQM.M	1	11	1	1	1
Human	P01891	no	GYYNQSEAGSHTIQMM	GYYN[115]QSEAGSHTIQMM	R.GYYNQSEAGSHTIQMM.Y	1	11	1	1	1
Human	P01891	no	GYYNQSEAGSHTIQMMY	GYYN[115]QSEAGSHTIQMMY	R.GYYNQSEAGSHTIQMMY.G	1	11	1	1	1
Human	P01891	no	GYYNQSEAGSHTIQMMYGCDVGSDGR	GYYN[115]QSEAGSHTIQMMYGCDVGSDGR	R.GYYNQSEAGSHTIQMMYGCDVGSDGR.F	1	11	2	1	1
Human	P01891	no	RYLENGKETLQR	RYLEN[115]GKETLQR	R.RYLENGKETLQR.T	1	11	2	0	1
Human	P01891	no	YLENGKETLQR	YLEN[115]GKETLQR	R.YLENGKETLQR.T	1	11	2	0	1
Human	P01891	no	YYNQSEAGSHTIQMMYGCDVGSDGR	YYN[115]QSEAGSHTIQMMYGCDVGSDGR	G.YYNQSEAGSHTIQMMYGCDVGSDGR.F	1	11	1	1	1
Human	P01892	no	AHSQTHRVDLGTLRGYYNQSEAGSHTVQR	AHSQTHRVDLGTLRGYYN[115]QSEAGSHTVQR	K.AHSQTHRVDLGTLRGYYNQSEAGSHTVQR.M	1	14	2	1	1
Human	P01892	no	GYYNQSEAGSH	GYYN[115]QSEAGSH	R.GYYNQSEAGSH.T	1	14	1	1	1
Human	P01892	no	GYYNQSEAGSHT	GYYN[115]QSEAGSHT	R.GYYNQSEAGSHT.V	1	14	1	1	1
Human	P01892	no	GYYNQSEAGSHTV	GYYN[115]QSEAGSHTV	R.GYYNQSEAGSHTV.Q	1	14	1	1	1
Human	P01892	no	GYYNQSEAGSHTVQ	GYYN[115]QSEAGSHTVQ	R.GYYNQSEAGSHTVQ.R	1	14	1	1	1
Human	P01892	no	GYYNQSEAGSHTVQR	GYYN[115]QSEAGSHTVQR	R.GYYNQSEAGSHTVQR.M	1	14	2	1	1
Human	P01892	no	NQSEAGSHTVQR	N[115]QSEAGSHTVQR	Y.NQSEAGSHTVQR.M	1	14	1	1	1
Human	P01892	no	RGYYNQSEAGSHTVQR	RGYYN[115]QSEAGSHTVQR	L.RGYYNQSEAGSHTVQR.M	1	14	1	1	1
Human	P01892	no	RYLENGKETLQR	RYLEN[115]GKETLQR	R.RYLENGKETLQR.T	1	14	2	0	1
Human	P01892	no	VDLGTLRGYYNQSEAGSHTVQR	VDLGTLRGYYN[115]QSEAGSHTVQR	R.VDLGTLRGYYNQSEAGSHTVQR.M	1	14	2	1	1
Human	P01892	no	VKAHSQTHRVDLGTLRGYYNQSEAGSHTVQR	VKAHSQTHRVDLGTLRGYYN[115]QSEAGSHTVQR	K.VKAHSQTHRVDLGTLRGYYNQSEAGSHTVQR.M	1	14	2	1	1
Human	P01892	no	YLENGKETLQR	YLEN[115]GKETLQR	R.YLENGKETLQR.T	1	14	2	0	1
Human	P01892	no	YNQSEAGSHTVQR	YN[115]QSEAGSHTVQR	Y.YNQSEAGSHTVQR.M	1	14	1	1	1
Human	P01892	no	YYNQSEAGSHTVQR	YYN[115]QSEAGSHTVQR	G.YYNQSEAGSHTVQR.M	1	14	1	1	1
Human	P01903	no	FTPPVVNVTWL	FTPPVVN[115]VTWL	K.FTPPVVNVTWL.R	0.94	26	1	1	1
Human	P01903	no	FTPPVVNVTWLR	FTPPVVN[115]VTWLR	K.FTPPVVNVTWLR.N	1	26	2	1	1
Human	P01903	no	NGKPVTTGVSETVFLPR	N[115]GKPVTTGVSETVFLPR	R.NGKPVTTGVSETVFLPR.E	1	26	2	0	1
Human	P01903	no	NGKPVTTGVSETVFLPREDHLFR	N[115]GKPVTTGVSETVFLPREDHLFR	R.NGKPVTTGVSETVFLPREDHLFR.K	1	26	2	0	1
Human	P01903	no	NGKPVTTGVSETVFLPREDHLFRK	N[115]GKPVTTGVSETVFLPREDHLFRK	R.NGKPVTTGVSETVFLPREDHLFRK.F	1	26	2	0	1
Human	P01903	no	PPVVNVTWLR	PPVVN[115]VTWLR	T.PPVVNVTWLR.N	1	26	1	1	1
Human	P01903	no	PVVNVTWLR	PVVN[115]VTWLR	P.PVVNVTWLR.N	1	26	1	1	1
Human	P01903	no	RSNYTPITN	RSN[115]YTPITN	K.RSNYTPITN.V	0.99	26	1	1	1
Human	P01903	no	RSNYTPITNVPPEVT	RSN[115]YTPITNVPPEVT	K.RSNYTPITNVPPEVT.V	0.99	26	1	1	1
Human	P01903	no	RSNYTPITNVPPEVTVL	RSN[115]YTPITNVPPEVTVL	K.RSNYTPITNVPPEVTVL.T	1	26	1	1	1
Human	P01903	no	RSNYTPITNVPPEVTVLT	RSN[115]YTPITNVPPEVTVLT	K.RSNYTPITNVPPEVTVLT.N	1	26	1	1	1
Human	P01903	no	RSNYTPITNVPPEVTVLTN	RSN[115]YTPITN[115]VPPEVTVLTN[115]	K.RSNYTPITNVPPEVTVLTN.S	1	26	1	1	3
Human	P01903	no	RSNYTPITNVPPEVTVLTN	RSN[115]YTPITNVPPEVTVLTN	K.RSNYTPITNVPPEVTVLTN.S	1	26	1	1	1
Human	P01903	no	RSNYTPITNVPPEVTVLTNSPVELR	RSN[115]YTPITNVPPEVTVLTN[115]SPVELR	K.RSNYTPITNVPPEVTVLTNSPVELR.E	1	26	2	1	2
Human	P01903	no	RSNYTPITNVPPEVTVLTNSPVELR	RSN[115]YTPITNVPPEVTVLTNSPVELR	K.RSNYTPITNVPPEVTVLTNSPVELR.E	1	26	2	1	1
Human	P01903	no	RSNYTPITNVPPEVTVLTNSPVELR	RSNYTPITNVPPEVTVLTN[115]SPVELR	K.RSNYTPITNVPPEVTVLTNSPVELR.E	1	26	2	0	1
Human	P01903	no	RSNYTPITNVPPEVTVLTNSPVELR	RSNYTPITN[115]VPPEVTVLTN[115]SPVELR	K.RSNYTPITNVPPEVTVLTNSPVELR.E	1	26	2	0	2
Human	P01903	no	RSNYTPITNVPPEVTVLTNSPVELR	RSNYTPITN[115]VPPEVTVLTNSPVELR	K.RSNYTPITNVPPEVTVLTNSPVELR.E	1	26	2	0	1
Human	P01903	no	SNYTPITNVPPEVTVL	SN[115]YTPITNVPPEVTVL	R.SNYTPITNVPPEVTVL.T	1	26	1	1	1
Human	P01903	no	SNYTPITNVPPEVTVLTN	SN[115]YTPITNVPPEVTVLTN	R.SNYTPITNVPPEVTVLTN.S	1	26	1	1	1
Human	P01903	no	SNYTPITNVPPEVTVLTNSPVELR	SN[115]YTPITNVPPEVTVLTN[115]SPVELR	R.SNYTPITNVPPEVTVLTNSPVELR.E	1	26	2	1	2
Human	P01903	no	SNYTPITNVPPEVTVLTNSPVELR	SN[115]YTPITNVPPEVTVLTNSPVELR	R.SNYTPITNVPPEVTVLTNSPVELR.E	1	26	2	1	1
Human	P01903	no	SNYTPITNVPPEVTVLTNSPVELR	SNYTPITN[115]VPPEVTVLTNSPVELR	R.SNYTPITNVPPEVTVLTNSPVELR.E	1	26	2	0	1
Human	P01903	no	TPPVVNVTWLR	TPPVVN[115]VTWLR	F.TPPVVNVTWLR.N	1	26	1	1	1
Human	P01903	no	VNVTWLR	VN[115]VTWLR	V.VNVTWLR.N	0.99	26	1	1	1
Human	P01903	no	VVNVTWLR	VVN[115]VTWLR	P.VVNVTWLR.N	1	26	1	1	1
Human	P01906	no	SNSTAATNEVPEVTVFSK	SN[115]STAATN[115]EVPEVTVFSK	R.SNSTAATNEVPEVTVFSK.S	1	2	2	1	2
Human	P01906	no	SNSTAATNEVPEVTVFSK	SN[115]STAATNEVPEVTVFSK	R.SNSTAATNEVPEVTVFSK.S	1	2	2	1	1
Human	P01908	no	RSNSTAATNEVPEVTVF	RSN[115]STAATN[115]EVPEVTVF	K.RSNSTAATNEVPEVTVF.S	1	9	1	1	2
Human	P01908	no	RSNSTAATNEVPEVTVF	RSN[115]STAATNEVPEVTVF	K.RSNSTAATNEVPEVTVF.S	1	9	1	1	1
Human	P01908	no	RSNSTAATNEVPEVTVF	RSNSTAATN[115]EVPEVTVF	K.RSNSTAATNEVPEVTVF.S	1	9	1	0	1
Human	P01908	no	RSNSTAATNEVPEVTVFSK	RSN[115]STAATN[115]EVPEVTVFSK	K.RSNSTAATNEVPEVTVFSK.S	1	9	2	1	2
Human	P01908	no	RSNSTAATNEVPEVTVFSK	RSN[115]STAATNEVPEVTVFSK	K.RSNSTAATNEVPEVTVFSK.S	1	9	2	1	1
Human	P01908	no	SNSTAATNEVPEVTVF	SN[115]STAATN[115]EVPEVTVF	R.SNSTAATNEVPEVTVF.S	1	9	1	1	2
Human	P01908	no	SNSTAATNEVPEVTVF	SN[115]STAATNEVPEVTVF	R.SNSTAATNEVPEVTVF.S	1	9	1	1	1
Human	P01908	no	SNSTAATNEVPEVTVFSK	SN[115]STAATN[115]EVPEVTVFSK	R.SNSTAATNEVPEVTVFSK.S	1	9	2	1	2
Human	P01908	no	SNSTAATNEVPEVTVFSK	SN[115]STAATNEVPEVTVFSK	R.SNSTAATNEVPEVTVFSK.S	1	9	2	1	1
Human	P01909	no	RSNSTAATNEVPEVTVF	RSN[115]STAATN[115]EVPEVTVF	K.RSNSTAATNEVPEVTVF.S	1	9	1	1	2
Human	P01909	no	RSNSTAATNEVPEVTVF	RSN[115]STAATNEVPEVTVF	K.RSNSTAATNEVPEVTVF.S	1	9	1	1	1
Human	P01909	no	RSNSTAATNEVPEVTVF	RSNSTAATN[115]EVPEVTVF	K.RSNSTAATNEVPEVTVF.S	1	9	1	0	1
Human	P01909	no	RSNSTAATNEVPEVTVFSK	RSN[115]STAATN[115]EVPEVTVFSK	K.RSNSTAATNEVPEVTVFSK.S	1	9	2	1	2
Human	P01909	no	RSNSTAATNEVPEVTVFSK	RSN[115]STAATNEVPEVTVFSK	K.RSNSTAATNEVPEVTVFSK.S	1	9	2	1	1
Human	P01909	no	SNSTAATNEVPEVTVF	SN[115]STAATN[115]EVPEVTVF	R.SNSTAATNEVPEVTVF.S	1	9	1	1	2
Human	P01909	no	SNSTAATNEVPEVTVF	SN[115]STAATNEVPEVTVF	R.SNSTAATNEVPEVTVF.S	1	9	1	1	1
Human	P01909	no	SNSTAATNEVPEVTVFSK	SN[115]STAATN[115]EVPEVTVFSK	R.SNSTAATNEVPEVTVFSK.S	1	9	2	1	2
Human	P01909	no	SNSTAATNEVPEVTVFSK	SN[115]STAATNEVPEVTVFSK	R.SNSTAATNEVPEVTVFSK.S	1	9	2	1	1
Human	P01911	no	CHFFNGTER	CHFFN[115]GTER	E.CHFFNGTER.V	0.99	8	1	1	1
Human	P01911	no	ECHFFNGTER	ECHFFN[115]GTER	F.ECHFFNGTER.V	1	8	1	1	1
Human	P01911	no	FFNGTER	FFN[115]GTER	H.FFNGTER.V	0.98	8	1	1	1
Human	P01911	no	FLWQPKRECHFFNGTER	FLWQPKRECHFFN[115]GTER	R.FLWQPKRECHFFNGTER.V	0.94	8	2	1	1
Human	P01911	no	HFFNGTER	HFFN[115]GTER	C.HFFNGTER.V	1	8	1	1	1
Human	P01911	no	RECHFFNGTER	RECHFFN[115]GTER	K.RECHFFNGTER.V	1	8	2	1	1
Human	P01911	no	RECHFFNGTERVR	RECHFFN[115]GTERVR	K.RECHFFNGTERVR.F	1	8	2	1	1
Human	P01911	no	WFLNGQEEK	WFLN[115]GQEEK	R.WFLNGQEEK.A	0.99	8	2	0	1
Human	P01912	no	CHFFNGTER	CHFFN[115]GTER	E.CHFFNGTER.V	0.99	13	1	1	1
Human	P01912	no	ECHFFNGTER	ECHFFN[115]GTER	F.ECHFFNGTER.V	1	13	1	1	1
Human	P01912	no	EYSTSECHFFNGTER	EYSTSECHFFN[115]GTER	L.EYSTSECHFFNGTER.V	1	13	1	1	1
Human	P01912	no	FFNGTER	FFN[115]GTER	H.FFNGTER.V	0.98	13	1	1	1
Human	P01912	no	FLEYSTSECHFFNGTER	FLEYSTSECHFFN[115]GTER	R.FLEYSTSECHFFNGTER.V	1	13	2	1	1
Human	P01912	no	FLEYSTSECHFFNGTERVR	FLEYSTSECHFFN[115]GTERVR	R.FLEYSTSECHFFNGTERVR.F	1	13	2	1	1
Human	P01912	no	HFFNGTER	HFFN[115]GTER	C.HFFNGTER.V	1	13	1	1	1
Human	P01912	no	SECHFFNGTER	SECHFFN[115]GTER	T.SECHFFNGTER.V	1	13	1	1	1
Human	P01912	no	SECHFFNGTERVR	SECHFFN[115]GTERVR	T.SECHFFNGTERVR.F	1	13	1	1	1
Human	P01912	no	STSECHFFNGTER	STSECHFFN[115]GTER	Y.STSECHFFNGTER.V	1	13	1	1	1
Human	P01912	no	TSECHFFNGTER	TSECHFFN[115]GTER	S.TSECHFFNGTER.V	1	13	1	1	1
Human	P01912	no	WFRNGQEEK	WFRN[115]GQEEK	R.WFRNGQEEK.A	0.99	13	2	0	1
Human	P01912	no	YSTSECHFFNGTER	YSTSECHFFN[115]GTER	E.YSTSECHFFNGTER.V	1	13	1	1	1
Human	P01914	no	AAVDTYCRHNYGVGESFTVQR	AAVDTYCRHN[115]YGVGESFTVQR	R.AAVDTYCRHNYGVGESFTVQR.R	1	9	2	0	1
Human	P01914	no	CHFFNGTER	CHFFN[115]GTER	E.CHFFNGTER.V	0.99	9	1	1	1
Human	P01914	no	ECHFFNGTER	ECHFFN[115]GTER	F.ECHFFNGTER.V	1	9	1	1	1
Human	P01914	no	FECHFFNGTER	FECHFFN[115]GTER	K.FECHFFNGTER.V	1	9	2	1	1
Human	P01914	no	FECHFFNGTERVR	FECHFFN[115]GTERVR	K.FECHFFNGTERVR.L	0.99	9	2	1	1
Human	P01914	no	FFNGTER	FFN[115]GTER	H.FFNGTER.V	0.98	9	1	1	1
Human	P01914	no	HFFNGTER	HFFN[115]GTER	C.HFFNGTER.V	1	9	1	1	1
Human	P01914	no	TQPLQHHNLLVCSVNGFYPGSIEVR	TQPLQHHNLLVCSVN[115]GFYPGSIEVR	K.TQPLQHHNLLVCSVNGFYPGSIEVR.W	1	9	2	0	1
Human	P01914	no	WFRNGQEEK	WFRN[115]GQEEK	R.WFRNGQEEK.A	0.99	9	2	0	1
Human	P01920	no	AMCYFTNGTER	AMCYFTN[115]GTER	K.AMCYFTNGTER.V	1	5	2	1	1
Human	P01920	no	AMCYFTNGTERVR	AMCYFTN[115]GTERVR	K.AMCYFTNGTERVR.Y	1	5	2	1	1
Human	P01920	no	CYFTNGTER	CYFTN[115]GTER	M.CYFTNGTER.V	0.96	5	1	1	1
Human	P01920	no	TEALNHHNLLVCSVTDFYPAQIK	TEALNHHN[115]LLVCSVTDFYPAQIK	R.TEALNHHNLLVCSVTDFYPAQIK.V	1	5	2	0	1
Human	P01920	no	YFTNGTER	YFTN[115]GTER	C.YFTNGTER.V	0.94	5	1	1	1
Human	P02452	no	ASQNITYHCK	ASQN[115]ITYHCK	E.ASQNITYHCK.N	1	3	1	1	1
Human	P02452	no	LMSTEASQNITYH	LMSTEASQN[115]ITYH	R.LMSTEASQNITYH.C	1	3	1	1	1
Human	P02452	no	LMSTEASQNITYHCK	LMSTEASQN[115]ITYHCK	R.LMSTEASQNITYHCK.N	1	3	2	1	1
Human	P02458	no	LLSTEGSQNITYH	LLSTEGSQN[115]ITYH	R.LLSTEGSQNITYH.C	1	2	1	1	1
Human	P02458	no	LLSTEGSQNITYHCK	LLSTEGSQN[115]ITYHCK	R.LLSTEGSQNITYHCK.N	1	2	2	1	1
Human	P02461	no	ASQNITYH	ASQN[115]ITYH	E.ASQNITYH.C	0.99	3	0	1	1
Human	P02461	no	ASQNITYHCK	ASQN[115]ITYHCK	E.ASQNITYHCK.N	1	3	1	1	1
Human	P02461	no	NGETGPQGPPGPTGPGGD	N[115]GETGPQGPPGPTGPGGD	K.NGETGPQGPPGPTGPGGD.K	0.98	3	1	0	1
Human	P02545	no	TALINSTGEEVAMR	TALIN[115]STGEEVAMR	R.TALINSTGEEVAMR.K	1	1	2	1	1
Human	P02671	no	MDGSLNFNR	MDGSLNFN[115]R	R.MDGSLNFNR.T	1	1	2	1	1
Human	P02675	no	GTAGNALMDGASQLMGENR	GTAGNALMDGASQLMGEN[115]R	R.GTAGNALMDGASQLMGENR.T	1	2	2	1	1
Human	P02675	no	QGVNDNEEGFFSAR	QGVN[115]DNEEGFFSAR	S.QGVNDNEEGFFSAR.G	1	2	1	0	1
Human	P02749	no	LGNWSAMPSCK	LGN[115]WSAMPSCK	K.LGNWSAMPSCK.A	1	2	2	1	1
Human	P02749	no	VYKPSAGNNSLYR	VYKPSAGN[115]NSLYR	R.VYKPSAGNNSLYR.D	1	2	2	1	1
Human	P02751	no	DITYNVNDTFHK	DITYNVN[115]DTFHK	D.DITYNVNDTFHK.R	1	30	1	1	1
Human	P02751	no	DQCIVDDITYNVNDTFHK	DQCIVDDITYN[115]VN[115]DTFHK	R.DQCIVDDITYNVNDTFHK.R	1	30	2	1	2
Human	P02751	no	DQCIVDDITYNVNDTFHK	DQCIVDDITYNVN[115]DTFHK	R.DQCIVDDITYNVNDTFHK.R	1	30	2	1	1
Human	P02751	no	DQCIVDDITYNVNDTFHK	DQCIVDDITYN[115]VNDTFHK	R.DQCIVDDITYNVNDTFHK.R	1	30	2	0	1
Human	P02751	no	DQCIVDDITYNVNDTFHKR	DQCIVDDITYNVN[115]DTFHKR	R.DQCIVDDITYNVNDTFHKR.H	1	30	2	1	1
Human	P02751	no	EDVDYHLYPHGPGLNPNASTGQE	EDVDYHLYPHGPGLNPN[115]ASTGQE	R.EDVDYHLYPHGPGLNPNASTGQE.A	0.99	30	1	1	1
Human	P02751	no	ESKPLTAQQTTKLDAPTNLQFVNETDSTVLVR	ESKPLTAQQTTKLDAPTN[115]LQFVN[115]ETDSTVLVR	R.ESKPLTAQQTTKLDAPTNLQFVNETDSTVLVR.W	1	30	2	1	2
Human	P02751	no	ESKPLTAQQTTKLDAPTNLQFVNETDSTVLVR	ESKPLTAQQTTKLDAPTNLQFVN[115]ETDSTVLVR	R.ESKPLTAQQTTKLDAPTNLQFVNETDSTVLVR.W	1	30	2	1	1
Human	P02751	no	FVNETDSTVLVR	FVN[115]ETDSTVLVR	Q.FVNETDSTVLVR.W	1	30	1	1	1
Human	P02751	no	GGNSNGALCHFPFLYNNHNYTDCTSEGR	GGNSN[115]GALCHFPFLYN[115]NHN[115]YTDCTSEGR	Q.GGNSNGALCHFPFLYNNHNYTDCTSEGR.R	0.96	30	1	1	3
Human	P02751	no	GGNSNGALCHFPFLYNNHNYTDCTSEGR	GGNSN[115]GALCHFPFLYNNHN[115]YTDCTSEGR	Q.GGNSNGALCHFPFLYNNHNYTDCTSEGR.R	0.97	30	1	1	2
Human	P02751	no	GGNSNGALCHFPFLYNNHNYTDCTSEGR	GGNSNGALCHFPFLYNNHN[115]YTDCTSEGR	Q.GGNSNGALCHFPFLYNNHNYTDCTSEGR.R	0.98	30	1	1	1
Human	P02751	no	HEEGHMLNCTCFGQGR	HEEGHMLN[115]CTCFGQGR	R.HEEGHMLNCTCFGQGR.G	1	30	2	1	1
Human	P02751	no	HNYTDCTSEGR	HN[115]YTDCTSEGR	N.HNYTDCTSEGR.R	1	30	1	1	1
Human	P02751	no	LDAPTNLQFVNETDSTVLVR	LDAPTN[115]LQFVN[115]ETDSTVLVR	K.LDAPTNLQFVNETDSTVLVR.W	1	30	2	1	2
Human	P02751	no	LDAPTNLQFVNETDSTVLVR	LDAPTNLQFVN[115]ETDSTVLVR	K.LDAPTNLQFVNETDSTVLVR.W	1	30	2	1	1
Human	P02751	no	LNCTCFGQGR	LN[115]CTCFGQGR	M.LNCTCFGQGR.G	1	30	1	1	1
Human	P02751	no	LYNNHNYTDCTSEGR	LYN[115]N[115]HN[115]YTDCTSEGR	F.LYNNHNYTDCTSEGR.R	1	30	1	1	3
Human	P02751	no	LYNNHNYTDCTSEGR	LYN[115]NHN[115]YTDCTSEGR	F.LYNNHNYTDCTSEGR.R	1	30	1	1	2
Human	P02751	no	LYNNHNYTDCTSEGR	LYNN[115]HN[115]YTDCTSEGR	F.LYNNHNYTDCTSEGR.R	1	30	1	1	2
Human	P02751	no	LYNNHNYTDCTSEGR	LYNNHN[115]YTDCTSEGR	F.LYNNHNYTDCTSEGR.R	1	30	1	1	1
Human	P02751	no	LYNNHNYTDCTSEGR	LYNN[115]HNYTDCTSEGR	F.LYNNHNYTDCTSEGR.R	1	30	1	0	1
Human	P02751	no	LYNNHNYTDCTSEGR	LYN[115]NHNYTDCTSEGR	F.LYNNHNYTDCTSEGR.R	1	30	1	0	1
Human	P02751	no	LYNNHNYTDCTSEGR	LYN[115]N[115]HNYTDCTSEGR	F.LYNNHNYTDCTSEGR.R	1	30	1	0	2
Human	P02751	no	MLNCTCFGQGR	MLN[115]CTCFGQGR	H.MLNCTCFGQGR.G	1	30	1	1	1
Human	P02751	no	NHNYTDCTSEGR	NHN[115]YTDCTSEGR	N.NHNYTDCTSEGR.R	1	30	1	1	1
Human	P02751	no	NNHNYTDCTSEGR	NNHN[115]YTDCTSEGR	Y.NNHNYTDCTSEGR.R	1	30	1	1	1
Human	P02751	no	NNHNYTDCTSEGR	NN[115]HNYTDCTSEGR	Y.NNHNYTDCTSEGR.R	1	30	1	0	1
Human	P02751	no	RHEEGHMLNCTCFGQGR	RHEEGHMLN[115]CTCFGQGR	K.RHEEGHMLNCTCFGQGR.G	1	30	2	1	1
Human	P02751	no	TYNVNDTFHK	TYNVN[115]DTFHK	I.TYNVNDTFHK.R	1	30	1	1	1
Human	P02760	no	WNITMESYVVH	WN[115]ITMESYVVH	K.WNITMESYVVH.T	1	1	1	1	1
Human	P02763	no	LVPVPITNATLDQITGK	LVPVPITN[115]ATLDQITGK	N.LVPVPITNATLDQITGK.W	1	1	1	1	1
Human	P02765	no	AALAAFNAQNNGSNFQLEEISR	AALAAFNAQNN[115]GSNFQLEEISR	K.AALAAFNAQNNGSNFQLEEISR.A	1	2	2	1	1
Human	P02765	no	VCQDCPLLAPLNDTR	VCQDCPLLAPLN[115]DTR	K.VCQDCPLLAPLNDTR.V	1	2	2	1	1
Human	P02786	CD71	AHLGTGDPYTPGFPSFNHTQFPPSR	AHLGTGDPYTPGFPSFN[115]HTQFPPSR	H.AHLGTGDPYTPGFPSFNHTQFPPSR.S	1	33	1	1	1
Human	P02786	CD71	DFEDLYTPVNGSIVIVR	DFEDLYTPVN[115]GSIVIVR	K.DFEDLYTPVNGSIVIVR.A	1	33	2	1	1
Human	P02786	CD71	DSAQNSVIIVDKNGR	DSAQNSVIIVDKN[115]GR	K.DSAQNSVIIVDKNGR.L	1	33	2	0	1
Human	P02786	CD71	FEDLYTPVNGSIVIVR	FEDLYTPVN[115]GSIVIVR	D.FEDLYTPVNGSIVIVR.A	1	33	1	1	1
Human	P02786	CD71	FNETLFR	FN[115]ETLFR	A.FNETLFR.N	1	33	1	1	1
Human	P02786	CD71	GAFNETLFR	GAFN[115]ETLFR	N.GAFNETLFR.N	1	33	1	1	1
Human	P02786	CD71	KDFEDLYTPVNGSIV	KDFEDLYTPVN[115]GSIV	K.KDFEDLYTPVNGSIV.I	1	33	1	1	1
Human	P02786	CD71	KDFEDLYTPVNGSIVIV	KDFEDLYTPVN[115]GSIVIV	K.KDFEDLYTPVNGSIVIV.R	1	33	1	1	1
Human	P02786	CD71	KDFEDLYTPVNGSIVIVR	KDFEDLYTPVN[115]GSIVIVR	K.KDFEDLYTPVNGSIVIVR.A	1	33	2	1	1
Human	P02786	CD71	KQNNGAFNETLF	KQNN[115]GAFN[115]ETLF	R.KQNNGAFNETLF.R	1	33	1	1	2
Human	P02786	CD71	KQNNGAFNETLF	KQNNGAFN[115]ETLF	R.KQNNGAFNETLF.R	1	33	1	1	1
Human	P02786	CD71	KQNNGAFNETLFR	KQN[115]N[115]GAFN[115]ETLFR	R.KQNNGAFNETLFR.N	1	33	2	1	3
Human	P02786	CD71	KQNNGAFNETLFR	KQN[115]NGAFN[115]ETLFR	R.KQNNGAFNETLFR.N	1	33	2	1	2
Human	P02786	CD71	KQNNGAFNETLFR	KQNN[115]GAFN[115]ETLFR	R.KQNNGAFNETLFR.N	1	33	2	1	2
Human	P02786	CD71	KQNNGAFNETLFR	KQNNGAFN[115]ETLFR	R.KQNNGAFNETLFR.N	1	33	2	1	1
Human	P02786	CD71	KQNNGAFNETLFR	KQN[115]N[115]GAFNETLFR	R.KQNNGAFNETLFR.N	1	33	2	0	2
Human	P02786	CD71	LAVDEEENADNNTK	LAVDEEENADN[115]NTK	K.LAVDEEENADNNTK.A	1	33	2	1	1
Human	P02786	CD71	LGTGDPYTPGFPSFNHTQFPPSR	LGTGDPYTPGFPSFN[115]HTQFPPSR	H.LGTGDPYTPGFPSFNHTQFPPSR.S	1	33	1	1	1
Human	P02786	CD71	LLNENSYVPR	LLNEN[115]SYVPR	K.LLNENSYVPR.E	0.94	33	2	0	1
Human	P02786	CD71	LLNENSYVPR	LLN[115]ENSYVPR	K.LLNENSYVPR.E	1	33	2	0	1
Human	P02786	CD71	LVHANFGTKKDFEDLYTPVNGSIVIVR	LVHANFGTKKDFEDLYTPVN[115]GSIVIVR	K.LVHANFGTKKDFEDLYTPVNGSIVIVR.A	1	33	2	1	1
Human	P02786	CD71	LVHANFGTKKDFEDLYTPVNGSIVIVR	LVHAN[115]FGTKKDFEDLYTPVNGSIVIVR	K.LVHANFGTKKDFEDLYTPVNGSIVIVR.A	1	33	2	0	1
Human	P02786	CD71	LYTPVNGSIVIVR	LYTPVN[115]GSIVIVR	D.LYTPVNGSIVIVR.A	1	33	1	1	1
Human	P02786	CD71	NGAFNETLFR	NGAFN[115]ETLFR	N.NGAFNETLFR.N	1	33	1	1	1
Human	P02786	CD71	NGAFNETLFR	N[115]GAFN[115]ETLFR	N.NGAFNETLFR.N	1	33	1	1	2
Human	P02786	CD71	NGSIVIVR	N[115]GSIVIVR	V.NGSIVIVR.A	0.99	33	1	1	1
Human	P02786	CD71	PVNGSIVIVR	PVN[115]GSIVIVR	T.PVNGSIVIVR.A	1	33	1	1	1
Human	P02786	CD71	QNNGAFNETLFR	QN[115]N[115]GAFN[115]ETLFR	K.QNNGAFNETLFR.N	1	33	2	1	3
Human	P02786	CD71	QNNGAFNETLFR	QNN[115]GAFN[115]ETLFR	K.QNNGAFNETLFR.N	1	33	2	1	2
Human	P02786	CD71	QNNGAFNETLFR	QNNGAFN[115]ETLFR	K.QNNGAFNETLFR.N	1	33	2	1	1
Human	P02786	CD71	TPVNGSIVIVR	TPVN[115]GSIVIVR	Y.TPVNGSIVIVR.A	1	33	1	1	1
Human	P02786	CD71	YNSQLLSFVR	YN[115]SQLLSFVR	R.YNSQLLSFVR.D	1	33	2	0	1
Human	P02786	CD71	YTPVNGSIVIVR	YTPVN[115]GSIVIVR	L.YTPVNGSIVIVR.A	1	33	1	1	1
Human	P02787	no	QQQHLFGSNVTDCSGNFCLFR	QQQHLFGSN[115]VTDCSGNFCLFR	R.QQQHLFGSNVTDCSGNFCLFR.S	1	1	2	1	1
Human	P02788	no	GLLFNQTGSCK	GLLFN[115]QTGSCK	M.GLLFNQTGSCK.F	0.99	1	1	1	1
Human	P02790	no	ALPQPQNVTSLLGCTH	ALPQPQN[115]VTSLLGCTH	K.ALPQPQNVTSLLGCTH.	1	4	1	1	1
Human	P02790	no	PAVGNCSSALR	PAVGN[115]CSSALR	W.PAVGNCSSALR.W	1	4	1	1	1
Human	P02790	no	SFDATTLDDNGTMLFFK	SFDATTLDDN[115]GTMLFFK	W.SFDATTLDDNGTMLFFK.G	1	4	1	1	1
Human	P02790	no	SWPAVGNCSSALR	SWPAVGN[115]CSSALR	R.SWPAVGNCSSALR.W	1	4	2	1	1
Human	P03989	no	RYLENGKETLQR	RYLEN[115]GKETLQR	R.RYLENGKETLQR.T	1	11	2	0	1
Human	P03989	no	RYYNQSEAGSHTLQNMYGCDVGPDGR	RYYN[115]QSEAGSHTLQNMYGCDVGPDGR	L.RYYNQSEAGSHTLQNMYGCDVGPDGR.L	1	11	1	1	1
Human	P03989	no	YLENGKETLQR	YLEN[115]GKETLQR	R.YLENGKETLQR.T	1	11	2	0	1
Human	P03989	no	YYNQSEAGSH	YYN[115]QSEAGSH	G.YYNQSEAGSH.T	1	11	0	1	1
Human	P03989	no	YYNQSEAGSHT	YYN[115]QSEAGSHT	G.YYNQSEAGSHT.V	1	11	0	1	1
Human	P03989	no	YYNQSEAGSHTL	YYN[115]QSEAGSHTL	R.YYNQSEAGSHTL.Q	1	11	1	1	1
Human	P03989	no	YYNQSEAGSHTLQ	YYN[115]QSEAGSHTLQ	R.YYNQSEAGSHTLQ.M	1	11	1	1	1
Human	P03989	no	YYNQSEAGSHTLQN	YYN[115]QSEAGSHTLQN	R.YYNQSEAGSHTLQN.M	1	11	1	1	1
Human	P03989	no	YYNQSEAGSHTLQNM	YYN[115]QSEAGSHTLQN[115]M	R.YYNQSEAGSHTLQNM.Y	1	11	1	1	2
Human	P03989	no	YYNQSEAGSHTLQNM	YYN[115]QSEAGSHTLQNM	R.YYNQSEAGSHTLQNM.Y	1	11	1	1	1
Human	P03989	no	YYNQSEAGSHTLQNMYGCDVGPDGR	YYN[115]QSEAGSHTLQNMYGCDVGPDGR	R.YYNQSEAGSHTLQNMYGCDVGPDGR.L	1	11	2	1	1
Human	P04003	no	LSVDKDQYVEPENVTIQ	LSVDKDQYVEPEN[115]VTIQ	R.LSVDKDQYVEPENVTIQ.C	0.91	1	1	1	1
Human	P04004	no	NGSLFAFR	N[115]GSLFAFR	K.NGSLFAFR.G	1	1	2	1	1
Human	P04062	no	ANSTHHNVR	AN[115]STHHNVR	L.ANSTHHNVR.L	1	13	1	1	1
Human	P04062	no	DLGPTLANSTHH	DLGPTLAN[115]STHH	R.DLGPTLANSTHH.N	1	13	1	1	1
Human	P04062	no	DLGPTLANSTHHN	DLGPTLAN[115]STHHN	R.DLGPTLANSTHHN.V	1	13	1	1	1
Human	P04062	no	DLGPTLANSTHHNVR	DLGPTLAN[115]STHHNVR	R.DLGPTLANSTHHNVR.L	1	13	2	1	1
Human	P04062	no	DLGPTLANSTHHNVR	DLGPTLANSTHHN[115]VR	R.DLGPTLANSTHHNVR.L	1	13	2	0	1
Human	P04062	no	GPTLANSTHHNVR	GPTLAN[115]STHHNVR	L.GPTLANSTHHNVR.L	1	13	1	1	1
Human	P04062	no	LANSTHHNVR	LAN[115]STHHNVR	T.LANSTHHNVR.L	1	13	1	1	1
Human	P04062	no	MELSMGPIQANHTGTGLLLTLQPEQK	MELSMGPIQAN[115]HTGTGLLLTLQPEQK	R.MELSMGPIQANHTGTGLLLTLQPEQK.F	1	13	2	1	1
Human	P04062	no	NSTHHNVR	N[115]STHHNVR	A.NSTHHNVR.L	0.98	13	1	1	1
Human	P04062	no	PTLANSTHHNVR	PTLAN[115]STHHNVR	G.PTLANSTHHNVR.L	1	13	1	1	1
Human	P04062	no	TLANSTHHNVR	TLAN[115]STHHNVR	P.TLANSTHHNVR.L	1	13	1	1	1
Human	P04062	no	TYTYADTPDDFQLHNF	TYTYADTPDDFQLHN[115]F	R.TYTYADTPDDFQLHNF.S	1	13	1	0	1
Human	P04062	no	TYTYADTPDDFQLHNFSLPEEDTK	TYTYADTPDDFQLHN[115]FSLPEEDTK	R.TYTYADTPDDFQLHNFSLPEEDTK.L	1	13	2	1	1
Human	P04114	no	FNSSYLQGTNQITGR	FN[115]SSYLQGTNQITGR	R.FNSSYLQGTNQITGR.Y	1	3	2	1	1
Human	P04114	no	FVEGSHNSTVSLTTK	FVEGSHN[115]STVSLTTK	K.FVEGSHNSTVSLTTK.N	1	3	2	1	1
Human	P04114	no	YDFNSSMLYSTAK	YDFN[115]SSMLYSTAK	K.YDFNSSMLYSTAK.G	1	3	2	1	1
Human	P04156	CD230	GENFTETDVK	GEN[115]FTETDVK	K.GENFTETDVK.M	1	6	2	1	1
Human	P04156	CD230	NFTETDVK	N[115]FTETDVK	E.NFTETDVK.M	0.99	6	1	1	1
Human	P04156	CD230	PMDEYSNQNNFVHDCVNITIK	PMDEYSNQNNFVHDCVN[115]ITIK	R.PMDEYSNQNNFVHDCVNITIK.Q	1	6	2	1	1
Human	P04156	CD230	QHTVTTTTKGENFTETDVK	QHTVTTTTKGEN[115]FTETDVK	K.QHTVTTTTKGENFTETDVK.M	1	6	2	1	1
Human	P04156	CD230	TKGENFTETDVK	TKGEN[115]FTETDVK	T.TKGENFTETDVK.M	0.99	6	1	1	1
Human	P04156	CD230	YPNQVYYRPMDEYSNQNNFVHDCVNITIK	YPNQVYYRPMDEYSNQNNFVHDCVN[115]ITIK	R.YPNQVYYRPMDEYSNQNNFVHDCVNITIK.Q	1	6	2	1	1
Human	P04216	CD90	ALHHSGHSPPISSQNVTVLR	ALHHSGHSPPISSQN[115]VTVLR	C.ALHHSGHSPPISSQNVTVLR.D	1	30	1	1	1
Human	P04216	CD90	DEGTYTCALHHSGHSPPISSQNVTVLR	DEGTYTCALHHSGHSPPISSQN[115]VTVLR	K.DEGTYTCALHHSGHSPPISSQNVTVLR.D	1	30	2	1	1
Human	P04216	CD90	ENTSSSPIQYEFSLTR	EN[115]TSSSPIQYEFSLTR	H.ENTSSSPIQYEFSLTR.E	1	30	1	1	1
Human	P04216	CD90	GHSPPISSQNVTVLR	GHSPPISSQN[115]VTVLR	S.GHSPPISSQNVTVLR.D	1	30	1	1	1
Human	P04216	CD90	GTYTCALHHSGHSPPISSQNVTVLR	GTYTCALHHSGHSPPISSQN[115]VTVLR	E.GTYTCALHHSGHSPPISSQNVTVLR.D	1	30	1	1	1
Human	P04216	CD90	HENTSSSPIQ	HEN[115]TSSSPIQ	R.HENTSSSPIQ.Y	0.95	30	1	1	1
Human	P04216	CD90	HENTSSSPIQY	HEN[115]TSSSPIQY	R.HENTSSSPIQY.E	1	30	1	1	1
Human	P04216	CD90	HENTSSSPIQYE	HEN[115]TSSSPIQYE	R.HENTSSSPIQYE.F	1	30	1	1	1
Human	P04216	CD90	HENTSSSPIQYEF	HEN[115]TSSSPIQYEF	R.HENTSSSPIQYEF.S	1	30	1	1	1
Human	P04216	CD90	HENTSSSPIQYEFS	HEN[115]TSSSPIQYEFS	R.HENTSSSPIQYEFS.L	1	30	1	1	1
Human	P04216	CD90	HENTSSSPIQYEFSL	HEN[115]TSSSPIQYEFSL	R.HENTSSSPIQYEFSL.T	1	30	1	1	1
Human	P04216	CD90	HENTSSSPIQYEFSLT	HEN[115]TSSSPIQYEFSLT	R.HENTSSSPIQYEFSLT.R	1	30	1	1	1
Human	P04216	CD90	HENTSSSPIQYEFSLTR	HEN[115]TSSSPIQYEFSLTR	R.HENTSSSPIQYEFSLTR.E	1	30	2	1	1
Human	P04216	CD90	HHSGHSPPISSQNVTVLR	HHSGHSPPISSQN[115]VTVLR	L.HHSGHSPPISSQNVTVLR.D	1	30	1	1	1
Human	P04216	CD90	HSGHSPPISSQNVTVLR	HSGHSPPISSQN[115]VTVLR	H.HSGHSPPISSQNVTVLR.D	1	30	1	1	1
Human	P04216	CD90	HSPPISSQNVTVLR	HSPPISSQN[115]VTVLR	G.HSPPISSQNVTVLR.D	1	30	1	1	1
Human	P04216	CD90	ISSQNVTVLR	ISSQN[115]VTVLR	P.ISSQNVTVLR.D	1	30	1	1	1
Human	P04216	CD90	LDCRHENTSSSPIQYEFSLTR	LDCRHEN[115]TSSSPIQYEFSLTR	R.LDCRHENTSSSPIQYEFSLTR.E	1	30	2	1	1
Human	P04216	CD90	LHHSGHSPPISSQNVTVLR	LHHSGHSPPISSQN[115]VTVLR	A.LHHSGHSPPISSQNVTVLR.D	1	30	1	1	1
Human	P04216	CD90	PISSQNVTVLR	PISSQN[115]VTVLR	P.PISSQNVTVLR.D	1	30	1	1	1
Human	P04216	CD90	PPISSQNVTVLR	PPISSQN[115]VTVLR	S.PPISSQNVTVLR.D	1	30	1	1	1
Human	P04216	CD90	SGHSPPISSQNVTVLR	SGHSPPISSQN[115]VTVLR	H.SGHSPPISSQNVTVLR.D	1	30	1	1	1
Human	P04216	CD90	SPPISSQNVTVLR	SPPISSQN[115]VTVLR	H.SPPISSQNVTVLR.D	1	30	1	1	1
Human	P04216	CD90	SQNVTVLR	SQN[115]VTVLR	S.SQNVTVLR.D	1	30	1	1	1
Human	P04216	CD90	SRTNFTSK	SRTN[115]FTSK	R.SRTNFTSK.Y	1	30	2	1	1
Human	P04216	CD90	SRTNFTSKYNMK	SRTN[115]FTSKYN[115]MK	R.SRTNFTSKYNMK.V	1	30	2	1	2
Human	P04216	CD90	SRTNFTSKYNMK	SRTN[115]FTSKYNMK	R.SRTNFTSKYNMK.V	1	30	2	1	1
Human	P04216	CD90	TNFTSKYNMK	TN[115]FTSKYNMK	R.TNFTSKYNMK.V	1	30	2	1	1
Human	P04216	CD90	TNFTSKYNMK	TNFTSKYN[115]MK	R.TNFTSKYNMK.V	0.94	30	2	0	1
Human	P04216	CD90	TYTCALHHSGHSPPISSQNVTVLR	TYTCALHHSGHSPPISSQN[115]VTVLR	G.TYTCALHHSGHSPPISSQNVTVLR.D	1	30	1	1	1
Human	P04220	no	GLTFQQNASSM	GLTFQQN[115]ASSM	R.GLTFQQNASSM.C	1	11	1	1	1
Human	P04220	no	THTNISESHPN	THTN[115]ISESHPN[115]	K.THTNISESHPN.A	1	11	1	2	2
Human	P04220	no	THTNISESHPNA	THTN[115]ISESHPN[115]A	K.THTNISESHPNA.T	1	11	1	1	2
Human	P04220	no	THTNISESHPNAT	THTN[115]ISESHPN[115]AT	K.THTNISESHPNAT.F	1	11	1	2	2
Human	P04220	no	THTNISESHPNAT	THTN[115]ISESHPNAT	K.THTNISESHPNAT.F	1	11	1	1	1
Human	P04220	no	THTNISESHPNATF	THTN[115]ISESHPN[115]ATF	K.THTNISESHPNATF.S	1	11	1	2	2
Human	P04220	no	THTNISESHPNATFS	THTN[115]ISESHPN[115]ATFS	K.THTNISESHPNATFS.A	1	11	1	2	2
Human	P04220	no	THTNISESHPNATFSA	THTN[115]ISESHPN[115]ATFSA	K.THTNISESHPNATFSA.V	1	11	1	2	2
Human	P04220	no	THTNISESHPNATFSAVG	THTN[115]ISESHPN[115]ATFSAVG	K.THTNISESHPNATFSAVG.E	1	11	1	2	2
Human	P04220	no	THTNISESHPNATFSAVGEA	THTN[115]ISESHPN[115]ATFSAVGEA	K.THTNISESHPNATFSAVGEA.S	1	11	1	2	2
Human	P04220	no	THTNISESHPNATFSAVGEAS	THTN[115]ISESHPN[115]ATFSAVGEAS	K.THTNISESHPNATFSAVGEAS.I	1	11	1	2	2
Human	P04222	no	GYYNQSEAGSH	GYYN[115]QSEAGSH	R.GYYNQSEAGSH.T	1	8	1	1	1
Human	P04222	no	GYYNQSEAGSHIIQ	GYYN[115]QSEAGSHIIQ	R.GYYNQSEAGSHIIQ.R	1	8	1	1	1
Human	P04222	no	GYYNQSEAGSHIIQR	GYYN[115]QSEAGSHIIQR	R.GYYNQSEAGSHIIQR.M	1	8	2	1	1
Human	P04222	no	GYYNQSEAGSHIIQRMYGCDVGPDGR	GYYN[115]QSEAGSHIIQRMYGCDVGPDGR	R.GYYNQSEAGSHIIQRMYGCDVGPDGR.L	1	8	2	1	1
Human	P04222	no	NLRGYYNQSEAGSHIIQR	NLRGYYN[115]QSEAGSHIIQR	R.NLRGYYNQSEAGSHIIQR.M	1	8	2	1	1
Human	P04222	no	NQSEAGSHIIQR	N[115]QSEAGSHIIQR	Y.NQSEAGSHIIQR.M	1	8	1	1	1
Human	P04222	no	YNQSEAGSHIIQR	YN[115]QSEAGSHIIQR	Y.YNQSEAGSHIIQR.M	1	8	1	1	1
Human	P04222	no	YYNQSEAGSHIIQR	YYN[115]QSEAGSHIIQR	G.YYNQSEAGSHIIQR.M	1	8	1	1	1
Human	P04229	no	AAVDTYCRHNYGVGESFTVQR	AAVDTYCRHN[115]YGVGESFTVQR	R.AAVDTYCRHNYGVGESFTVQR.R	1	8	2	0	1
Human	P04229	no	CHFFNGTER	CHFFN[115]GTER	E.CHFFNGTER.V	0.99	8	1	1	1
Human	P04229	no	ECHFFNGTER	ECHFFN[115]GTER	F.ECHFFNGTER.V	1	8	1	1	1
Human	P04229	no	FECHFFNGTER	FECHFFN[115]GTER	K.FECHFFNGTER.V	1	8	2	1	1
Human	P04229	no	FECHFFNGTERVR	FECHFFN[115]GTERVR	K.FECHFFNGTERVR.L	0.99	8	2	1	1
Human	P04229	no	FFNGTER	FFN[115]GTER	H.FFNGTER.V	0.98	8	1	1	1
Human	P04229	no	HFFNGTER	HFFN[115]GTER	C.HFFNGTER.V	1	8	1	1	1
Human	P04229	no	WFRNGQEEK	WFRN[115]GQEEK	R.WFRNGQEEK.A	0.99	8	2	0	1
Human	P04233	CD74	ALPMGALPQGPMQNATK	ALPMGALPQGPMQN[115]ATK	Q.ALPMGALPQGPMQNATK.Y	1	25	1	1	1
Human	P04233	CD74	ALPQGPMQNATK	ALPQGPMQN[115]ATK	G.ALPQGPMQNATK.Y	1	25	1	1	1
Human	P04233	CD74	ATPLLMQALPMGALPQGPMQNATK	ATPLLMQALPMGALPQGPMQN[115]ATK	M.ATPLLMQALPMGALPQGPMQNATK.Y	1	25	1	1	1
Human	P04233	CD74	GALPQGPMQNATK	GALPQGPMQN[115]ATK	M.GALPQGPMQNATK.Y	1	25	1	1	1
Human	P04233	CD74	GHHNCSESLELEDPSSGLGVTK	GHHN[115]CSESLELEDPSSGLGVTK	R.GHHNCSESLELEDPSSGLGVTK.Q	1	25	2	1	1
Human	P04233	CD74	LMQALPMGALPQGPMQNATK	LMQALPMGALPQGPMQN[115]ATK	L.LMQALPMGALPQGPMQNATK.Y	1	25	1	1	1
Human	P04233	CD74	LPMGALPQGPMQNATK	LPMGALPQGPMQN[115]ATK	A.LPMGALPQGPMQNATK.Y	1	25	1	1	1
Human	P04233	CD74	LPQGPMQNATK	LPQGPMQN[115]ATK	A.LPQGPMQNATK.Y	1	25	1	1	1
Human	P04233	CD74	MATPLLMQALPMGALPQGPMQNATK	MATPLLMQALPMGALPQGPMQN[115]ATK	R.MATPLLMQALPMGALPQGPMQNATK.Y	1	25	2	1	1
Human	P04233	CD74	MGALPQGPMQNATK	MGALPQGPMQN[115]ATK	P.MGALPQGPMQNATK.Y	1	25	1	1	1
Human	P04233	CD74	MQALPMGALPQGPMQNATK	MQALPMGALPQGPMQN[115]ATK	L.MQALPMGALPQGPMQNATK.Y	1	25	1	1	1
Human	P04233	CD74	PMGALPQGPMQNATK	PMGALPQGPMQN[115]ATK	L.PMGALPQGPMQNATK.Y	1	25	1	1	1
Human	P04233	CD74	PQGPMQNATK	PQGPMQN[115]ATK	L.PQGPMQNATK.Y	1	25	1	1	1
Human	P04233	CD74	QALPMGALPQGPMQNATK	QALPMGALPQGPMQN[115]ATK	M.QALPMGALPQGPMQNATK.Y	1	25	1	1	1
Human	P04233	CD74	YGNMTEDH	YGN[115]MTEDH	K.YGNMTEDH.V	1	25	1	1	1
Human	P04233	CD74	YGNMTEDHV	YGN[115]MTEDHV	K.YGNMTEDHV.M	1	25	1	1	1
Human	P04233	CD74	YGNMTEDHVM	YGN[115]MTEDHVM	K.YGNMTEDHVM.H	1	25	1	1	1
Human	P04233	CD74	YGNMTEDHVMH	YGN[115]MTEDHVMH	K.YGNMTEDHVMH.L	1	25	1	1	1
Human	P04233	CD74	YGNMTEDHVMHL	YGN[115]MTEDHVMHL	K.YGNMTEDHVMHL.L	1	25	1	1	1
Human	P04233	CD74	YGNMTEDHVMHLL	YGN[115]MTEDHVMHLL	K.YGNMTEDHVMHLL.Q	1	25	1	1	1
Human	P04233	CD74	YGNMTEDHVMHLLQ	YGN[115]MTEDHVMHLLQ	K.YGNMTEDHVMHLLQ.N	1	25	1	1	1
Human	P04233	CD74	YGNMTEDHVMHLLQN	YGN[115]MTEDHVMHLLQN	K.YGNMTEDHVMHLLQN.A	1	25	1	1	1
Human	P04233	CD74	YGNMTEDHVMHLLQNADPLK	YGN[115]MTEDHVMHLLQN[115]ADPLK	K.YGNMTEDHVMHLLQNADPLK.V	1	25	2	1	2
Human	P04233	CD74	YGNMTEDHVMHLLQNADPLK	YGN[115]MTEDHVMHLLQNADPLK	K.YGNMTEDHVMHLLQNADPLK.V	1	25	2	1	1
Human	P04233	CD74	YGNMTEDHVMHLLQNADPLKVYPPLK	YGN[115]MTEDHVMHLLQNADPLKVYPPLK	K.YGNMTEDHVMHLLQNADPLKVYPPLK.G	1	25	2	1	1
Human	P04234	CD3d	CNGTDIYK	CN[115]GTDIYK	R.CNGTDIYK.D	1	1	2	1	1
Human	P04264	no	RTNAENEFVTIK	RTN[115]AEN[115]EFVTIK	K.RTNAENEFVTIK.K	0.93	1	2	0	2
Human	P04275	no	ASPPSSSCNISSGEMQK	ASPPSSSCN[115]ISSGEMQK	R.ASPPSSSCNISSGEMQK.G	1	3	2	1	1
Human	P04275	no	MEACMLNGTVIGPGK	MEACMLN[115]GTVIGPGK	R.MEACMLNGTVIGPGK.T	1	3	2	1	1
Human	P04275	no	TTCNPCPLGYKEENNTGECCGR	TTCNPCPLGYKEEN[115]NTGECCGR	K.TTCNPCPLGYKEENNTGECCGR.C	1	3	2	1	1
Human	P04350	no	FVEWIPNNVK	FVEWIPN[115]NVK	C.FVEWIPNNVK.V	0.93	8	1	0	1
Human	P04350	no	IGNSTAIQELFK	IGN[115]STAIQELFK	F.IGNSTAIQELFK.R	1	8	1	1	1
Human	P04350	no	LAVNMVPFPR	LAVN[115]MVPFPR	K.LAVNMVPFPR.L	1	8	2	0	1
Human	P04350	no	NSSYFVEWIPNNVK	N[115]SSYFVEWIPN[115]N[115]VK	K.NSSYFVEWIPNNVK.T	1	8	2	1	3
Human	P04350	no	NSSYFVEWIPNNVK	N[115]SSYFVEWIPNNVK	K.NSSYFVEWIPNNVK.T	1	8	2	1	1
Human	P04350	no	NSSYFVEWIPNNVK	NSSYFVEWIPNN[115]VK	K.NSSYFVEWIPNNVK.T	1	8	2	0	1
Human	P04350	no	NSSYFVEWIPNNVK	NSSYFVEWIPN[115]NVK	K.NSSYFVEWIPNNVK.T	1	8	2	0	1
Human	P04350	no	TFIGNSTAIQELFK	TFIGN[115]STAIQELFK	A.TFIGNSTAIQELFK.R	1	8	1	1	1
Human	P04406	no	GKVKVGVNGFGR	GKVKVGVN[115]GFGR	M.GKVKVGVNGFGR.I	1	9	1	0	1
Human	P04406	no	IISNASCTTNCLAPLAK	IISN[115]ASCTTNCLAPLAK	K.IISNASCTTNCLAPLAK.V	1	9	2	1	1
Human	P04406	no	LISWYDNEFGYSNR	LISWYDN[115]EFGYSNR	K.LISWYDNEFGYSNR.V	1	9	2	0	1
Human	P04406	no	LVINGNPITIFQER	LVIN[115]GNPITIFQER	K.LVINGNPITIFQER.D	1	9	2	0	1
Human	P04406	no	PTANVSVVDLTCR	PTAN[115]VSVVDLTCR	V.PTANVSVVDLTCR.L	1	9	1	1	1
Human	P04406	no	TANVSVVDLTCR	TAN[115]VSVVDLTCR	P.TANVSVVDLTCR.L	1	9	1	1	1
Human	P04406	no	VGVNGFGR	VGVN[115]GFGR	K.VGVNGFGR.I	1	9	2	0	1
[truncated: 12,846 more rows]
