# Supplementary material for: A Mass Spectrometric-Derived Cell Surface Protein Atlas
Source: PLoS One. 2015 Apr 20;10(4):e0121314. doi: 10.1371/journal.pone.0121314 (PMC4404347; doi:10.1371/journal.pone.0121314)
Supplement: S6 File — Excel file containing tables for generating inclusion lists and transition list of surfaceome proteins within the CSPA. A. Human inclusion list. B. Mouse inclusion list. C. Transition list. D. Measured transitions of Fig 6. (XLSX) [file pone.0121314.s007.xlsx]

## Sheet: Table A
Organisme	Protein	CSPA category	Modified Sequence	Deamidated Sequence	charge	m/z
Human	A1A5B4	1 - high confidence	DFQDPDGIEGSEN[115]VTLCR	DFQDPDGIEGSEDVTLCR	2	1026.95
Human	A1A5B4	1 - high confidence	EGN[115]STVDCLK	EGDSTVDCLK	2	562.253
Human	A1A5C7	1 - high confidence	SNSSGADGGDTPPLPSPPDKGDN[115]ASN[115]CDCR	SNSSGADGGDTPPLPSPPDKGDDASDCDCR	2	1524.12
Human	A1A5C7	1 - high confidence	SN[115]SSGADGGDTPPLPSPPDKGDN[115]ASNCDCR	SDSSGADGGDTPPLPSPPDKGDDASNCDCR	2	1524.12
Human	A1A5C7	1 - high confidence	SN[115]SSGADGGDTPPLPSPPDK	SDSSGADGGDTPPLPSPPDK	2	948.93
Human	A2BFH1	3 - unspecific	AGPNTN[115]GSQFFICTAK	AGPNTDGSQFFICTAK	2	857.402
Human	A2RU67	1 - high confidence	YLSN[115]GTLAAPVVVLPDLDEDGVR	YLSDGTLAAPVVVLPDLDEDGVR	2	1207.63
Human	A2RU67	1 - high confidence	APDSN[115]CSNLLITTR	APDSDCSNLLITTR	2	781.881
Human	A2VDJ0	1 - high confidence	NN[115]LTVIDMIGVEGFGAR	NDLTVIDMIGVEGFGAR	2	903.959
Human	A2VDJ0	1 - high confidence	DALSLQFEPVLLPTSTTN[115]FTK	DALSLQFEPVLLPTSTTDFTK	2	1162.11
Human	A6NGN9	2 - putative	HYGN[115]YTCR	HYGDYTCR	2	536.222
Human	A6NGN9	2 - putative	SMLLFAN[115]VSAR	SMLLFADVSAR	2	605.321
Human	A6NGU5	1 - high confidence	FN[115]SSEQSQK	FDSSEQSQK	2	528.239
Human	A6NGU5	1 - high confidence	LHN[115]KLLPN[115]VTTVER	LHDKLLPDVTTVER	2	818.46
Human	A6NGU5	1 - high confidence	AVEEPRLHNKLLPN[115]VTTVER	AVEEPRLHNKLLPDVTTVER	2	1158.64
Human	A6NGU5	1 - high confidence	MFN[115]SSEQSQK	MFDSSEQSQK	2	593.759
Human	A6NGU5	1 - high confidence	N[115]MTSEFFAAQLR	DMTSEFFAAQLR	2	708.338
Human	A6NGU5	1 - high confidence	PN[115]VTTVER	PDVTTVER	2	458.743
Human	A6NGU5	1 - high confidence	LAFASMFN[115]SSEQSQK	LAFASMFDSSEQSQK	2	838.388
Human	A6NGU5	1 - high confidence	LHNKLLPN[115]VTTVER	LHNKLLPDVTTVER	2	817.968
Human	A6NI73	2 - putative	SGAADN[115]LSPSQN[115]K	SGAADDLSPSQDK	2	645.797
Human	A6NI73	2 - putative	SGAADNLSPSQN[115]K	SGAADNLSPSQDK	2	645.305
Human	A6NKC4	1 - high confidence	SVN[115]DSGEYR	SVDDSGEYR	2	514.223
Human	A6NKC4	1 - high confidence	TSASVN[115]DSGEYR	TSASVDDSGEYR	2	643.781
Human	A6NKC4	1 - high confidence	ITSASVN[115]DSGEYR	ITSASVDDSGEYR	2	700.323
Human	A6NKL6	1 - high confidence	PGGVN[115]SSSAGAPR	PGGVDSSSAGAPR	2	579.284
Human	A6NKL6	1 - high confidence	APGGVN[115]SSSAGAPR	APGGVDSSSAGAPR	2	614.802
Human	A6NMZ7	2 - putative	EAN[115]QTQLR	EADQTQLR	2	480.744
Human	A6NMZ7	2 - putative	VINSLSMGIN[115]K	VINSLSMGIDK	2	588.821
Human	A6NMZ7	2 - putative	VGLVAYSN[115]ETK	VGLVAYSDETK	2	591.309
Human	A6NMZ7	2 - putative	TFADLAAHN[115]QTFLK	TFADLAAHDQTFLK	2	789.405
Human	A7MBM2	1 - high confidence	YLAVLSN[115]R	YLAVLSDR	2	468.764
Human	A7MBM2	1 - high confidence	LSPDLELN[115]SSSSHNTLRPAPR	LSPDLELDSSSSHNTLRPAPR	2	1146.59
Human	A7MBM2	1 - high confidence	LLFLSPDLELN[115]SSSSHNTLRPAPR	LLFLSPDLELDSSSSHNTLRPAPR	2	1333.2
Human	A7MBM2	1 - high confidence	LLFLSPDLELNSSSSHN[115]TLRPAP	LLFLSPDLELNSSSSHDTLRPAP	2	1255.15
Human	A7MBM2	1 - high confidence	LLFLSPDLELN[115]SSSSHNTLRPAP	LLFLSPDLELDSSSSHNTLRPAP	2	1255.15
Human	A7MBM2	1 - high confidence	SN[115]SSLVRDPAFSASGPEAQR	SDSSLVRDPAFSASGPEAQR	2	1039
Human	A7MBM2	1 - high confidence	LATPWGLADN[115]YTSVTGMDLGLK	LATPWGLADDYTSVTGMDLGLK	2	1162.58
Human	A8MVW0	1 - high confidence	ASVDVFGN[115]R	ASVDVFGDR	2	483.241
Human	A8MVW5	1 - high confidence	VNIQGN[115]GTLSASQK	VNIQGDGTLSASQK	2	709.371
Human	A8MWY0	1 - high confidence	MALCTNN[115]ITDFTVK	MALCTNDITDFTVK	2	814.89
Human	A8MYG8	3 - unspecific	LDGEN[115]GTPLMK	LDGEDGTPLMK	2	588.287
Human	A8TX70	2 - putative	TQIQN[115]VSK	TQIQDVSK	2	459.751
Human	O00116	3 - unspecific	TN[115]ISYSQEADDR	TDISYSQEADDR	2	700.305
Human	O00206	1 - high confidence	SALEGLCN[115]LTIEEFR	SALEGLCDLTIEEFR	2	876.93
Human	O00206	1 - high confidence	LPEYFSN[115]LTNLEHLDLSSNK	LPEYFSDLTNLEHLDLSSNK	2	1168.08
Human	O00241	1 - high confidence	WLEN[115]GN[115]VSR	WLEDGDVSR	2	538.757
Human	O00241	1 - high confidence	LEN[115]GN[115]VSR	LEDGDVSR	2	445.717
Human	O00241	1 - high confidence	QLTWLEN[115]GN[115]VSR	QLTWLEDGDVSR	2	709.852
Human	O00241	1 - high confidence	QLTWLENGN[115]VSR	QLTWLENGDVSR	2	709.36
Human	O00241	1 - high confidence	GTAN[115]LSEAIR	GTADLSEAIR	2	516.773
Human	O00241	1 - high confidence	GLQLTWLENGN[115]VSR	GLQLTWLENGDVSR	2	794.413
Human	O00241	1 - high confidence	GLQLTWLEN[115]GN[115]VSR	GLQLTWLEDGDVSR	2	794.905
Human	O00241	1 - high confidence	LQLTWLENGN[115]VSR	LQLTWLENGDVSR	2	765.902
Human	O00241	1 - high confidence	LQLTWLEN[115]GN[115]VSR	LQLTWLEDGDVSR	2	766.394
Human	O00300	2 - putative	HIGHAN[115]LTFEQLR	HIGHADLTFEQLR	2	768.903
Human	O00391	1 - high confidence	N[115]STLDPGKPEMMK	DSTLDPGKPEMMK	2	724.845
Human	O00398	1 - high confidence	MGSN[115]STSTAEIYCN[115]VTNVK	MGSDSTSTAEIYCDVTNVK	2	1039.46
Human	O00451	1 - high confidence	AN[115]ELCAAESN[115]CSSR	ADELCAAESDCSSR	2	785.812
Human	O00451	1 - high confidence	AIQAFGN[115]GTDVN[115]VSPK	AIQAFGDGTDVDVSPK	2	810.402
Human	O00451	1 - high confidence	AIQAFGN[115]GTDVNVSPK	AIQAFGDGTDVNVSPK	2	809.91
Human	O00451	1 - high confidence	ANELCAAESN[115]CSSR	ANELCAAESDCSSR	2	785.32
Human	O00451	1 - high confidence	N[115]AIQAFGN[115]GTDVN[115]VSPK	DAIQAFGDGTDVDVSPK	2	867.916
Human	O00451	1 - high confidence	N[115]AIQAFGN[115]GTDVNVSPK	DAIQAFGDGTDVNVSPK	2	867.424
Human	O00451	1 - high confidence	NAIQAFGN[115]GTDVNVSPK	NAIQAFGDGTDVNVSPK	2	866.932
Human	O00451	1 - high confidence	NAIQAFGN[115]GTDVN[115]VSPK	NAIQAFGDGTDVDVSPK	2	867.424
Human	O00461	2 - putative	PAEQQN[115]VTQVAHSPQGYNTAR	PAEQQDVTQVAHSPQGYNTAR	2	1149.05
Human	O00461	2 - putative	KPDPAEQQN[115]VTQVAHSPQGY	KPDPAEQQDVTQVAHSPQGY	2	1098.02
Human	O00461	2 - putative	PDPAEQQN[115]VTQVAHSPQGYNTAR	PDPAEQQDVTQVAHSPQGYNTAR	2	1255.09
Human	O00461	2 - putative	DPAEQQN[115]VTQVAHSPQGYNTAR	DPAEQQDVTQVAHSPQGYNTAR	2	1206.57
Human	O00461	2 - putative	KPDPAEQQN[115]VTQVAH	KPDPAEQQDVTQVAH	2	831.911
Human	O00461	2 - putative	KPDPAEQQN[115]VTQVAHSPQGYNTAR	KPDPAEQQDVTQVAHSPQGYNTAR	2	1319.14
Human	O00468	2 - putative	CVEESGSAHCVCPMLTCPEAN[115]ATK	CVEESGSAHCVCPMLTCPEADATK	2	1355.06
Human	O00468	2 - putative	GCCQDN[115]ITAAR	GCCQDDITAAR	2	633.767
Human	O00468	2 - putative	NELMLN[115]SSLMR	NELMLDSSLMR	2	654.821
Human	O00469	2 - putative	LLSTANYN[115]TSHYN	LLSTANYDTSHYN	2	749.847
Human	O00469	2 - putative	LLSTANYN[115]TSH	LLSTANYDTSH	2	611.294
Human	O00469	2 - putative	LTHLHEGLPVKN[115]GTR	LTHLHEGLPVKDGTR	2	836.963
Human	O00469	2 - putative	IVGPEEN[115]LSQAEAR	IVGPEEDLSQAEAR	2	757.381
Human	O00469	2 - putative	YFN[115]YTVK	YFDYTVK	2	468.232
Human	O00469	2 - putative	YN[115]CSIESPR	YDCSIESPR	2	563.748
Human	O00469	2 - putative	EAIN[115]ITLDHK	EAIDITLDHK	2	577.809
Human	O00478	1 - high confidence	HN[115]VTASDSGK	HDVTASDSGK	2	508.739
Human	O00478	1 - high confidence	IHN[115]VTASDSGK	IHDVTASDSGK	2	565.281
Human	O00533	1 - high confidence	IIPSN[115]NSGTFR	IIPSDNSGTFR	2	603.812
Human	O00533	1 - high confidence	LTWEAGADHNSNISEYIVEFEGN[115]KEEPGR	LTWEAGADHNSNISEYIVEFEGDKEEPGR	2	1646.76
Human	O00533	1 - high confidence	PQGAPVEWEEETVTN[115]HTLR	PQGAPVEWEEETVTDHTLR	2	1097.53
Human	O00533	1 - high confidence	LTWEAGADHN[115]SNISEYIVEFEGNKEEPGR	LTWEAGADHDSNISEYIVEFEGNKEEPGR	2	1646.76
Human	O00533	1 - high confidence	LSNLN[115]ATTK	LSNLDATTK	2	481.764
Human	O00533	1 - high confidence	LTWEAGADHNSN[115]ISEYIVEFEGNKEEPGR	LTWEAGADHNSDISEYIVEFEGNKEEPGR	2	1646.76
Human	O00533	1 - high confidence	PSWHLSNLN[115]ATTK	PSWHLSNLDATTK	2	735.376
Human	O00533	1 - high confidence	SGEDYPDTAPVIHGVDVIN[115]STLVK	SGEDYPDTAPVIHGVDVIDSTLVK	2	1264.13
Human	O00533	1 - high confidence	PSN[115]NSGTFR	PSDNSGTFR	2	490.728
Human	O00533	1 - high confidence	VTWKPQGAPVEWEEETVTN[115]HTLR	VTWKPQGAPVEWEEETVTDHTLR	2	1354.67
Human	O00533	1 - high confidence	YHIYEN[115]GTLQIN[115]R	YHIYEDGTLQIDR	2	811.897
Human	O00533	1 - high confidence	DGEAFEIN[115]GTEDGR	DGEAFEIDGTEDGR	2	755.821
Human	O00567	3 - unspecific	IINDN[115]ATYCR	IINDDATYCR	2	620.788
Human	O00587	2 - putative	PSLNRPIHASEPQPHN[115]R	PSLNRPIHASEPQPHDR	2	976.001
Human	O00592	1 - high confidence	QLVLN[115]LTGN	QLVLDLTGN	2	486.775
Human	O00592	1 - high confidence	QLVLNLTGN[115]TLCAGGASDEK	QLVLNLTGDTLCAGGASDEK	2	1031.51
Human	O00592	1 - high confidence	QLVLN[115]LTGNTLCAGGASDEK	QLVLDLTGNTLCAGGASDEK	2	1031.51
Human	O00634	2 - putative	TCN[115]QTTGQCPCK	TCDQTTGQCPCK	2	728.29
Human	O00754	3 - unspecific	N[115]LSAPVTLNLR	DLSAPVTLNLR	2	599.846
Human	O00754	3 - unspecific	WWHQQTN[115]ATQEVVR	WWHQQTDATQEVVR	2	892.432
Human	O00754	3 - unspecific	LN[115]QTEPVAGNYYPVNTR	LDQTEPVAGNYYPVNTR	2	968.977
Human	O14494	1 - high confidence	IN[115]CSDGYIEYYICR	IDCSDGYIEYYICR	2	913.893
Human	O14495	1 - high confidence	FLSVCNPDFSQIN[115]CSEGYIQNYR	FLSVCNPDFSQIDCSEGYIQNYR	2	1406.62
Human	O14498	2 - putative	FQAFAN[115]GSLLIPDFGK	FQAFADGSLLIPDFGK	2	863.449
Human	O14524	1 - high confidence	LN[115]DTYVNVGLYSTK	LDDTYVNVGLYSTK	2	794.402
Human	O14556	3 - unspecific	IVSN[115]ASCTTNCLAPLAK	IVSDASCTTNCLAPLAK	2	910.951
Human	O14638	2 - putative	N[115]LSCRKPDQHFKPYLTPDLPK	DLSCRKPDQHFKPYLTPDLPK	2	1278.16
Human	O14638	2 - putative	YN[115]GSVPFEER	YDGSVPFEER	2	599.775
Human	O14657	3 - unspecific	EERPLN[115]ASALK	EERPLDASALK	2	614.833
Human	O14672	1 - high confidence	IRIN[115]TTADEKDPTNPFR	IRIDTTADEKDPTNPFR	2	995.008
Human	O14672	1 - high confidence	EGICN[115]GFTALCPASDPKPNFTDCN[115]R	EGICDGFTALCPASDPKPNFTDCDR	2	1422.11
Human	O14672	1 - high confidence	EGICNGFTALCPASDPKPN[115]FTDCN[115]R	EGICNGFTALCPASDPKPDFTDCDR	2	1422.11
Human	O14672	1 - high confidence	INTTADEKDPTN[115]PFR	INTTADEKDPTDPFR	2	860.416
Human	O14672	1 - high confidence	IN[115]TTADEKDPTNPF	IDTTADEKDPTNPF	2	782.365
Human	O14672	1 - high confidence	IN[115]TTADEK	IDTTADEK	2	446.72
Human	O14672	1 - high confidence	IN[115]TTADEKDPTN	IDTTADEKDPTN	2	660.305
Human	O14672	1 - high confidence	IN[115]TTADEKDPTNPFRFPNIGVEK	IDTTADEKDPTNPFRFPNIGVEK	2	1302.65
Human	O14672	1 - high confidence	N[115]ISQVLEK	DISQVLEK	2	466.261
Human	O14672	1 - high confidence	TALCPASDPKPN[115]FTDCNR	TALCPASDPKPDFTDCNR	2	1032.96
Human	O14672	1 - high confidence	N[115]TTADEKDPTNPFR	DTTADEKDPTNPFR	2	803.874
Human	O14672	1 - high confidence	EGICN[115]GFTALCPASDPKPN[115]FTDCNR	EGICDGFTALCPASDPKPDFTDCNR	2	1422.11
Human	O14672	1 - high confidence	PKPN[115]FTDCNR	PKPDFTDCNR	2	625.288
Human	O14672	1 - high confidence	EGICNGFTALCPASDPKPN[115]FTDCNR	EGICNGFTALCPASDPKPDFTDCNR	2	1421.62
Human	O14672	1 - high confidence	IN[115]TTADEKDPTNPFR	IDTTADEKDPTNPFR	2	860.416
Human	O14773	3 - unspecific	FLSSSPHLPPSSYFN[115]ASGR	FLSSSPHLPPSSYFDASGR	2	1026.5
Human	O14786	1 - high confidence	PECSQN[115]YTTPSGVIK	PECSQDYTTPSGVIK	2	841.394
Human	O14786	1 - high confidence	SQYSTN[115]WSAER	SQYSTDWSAER	2	665.292
Human	O14786	1 - high confidence	SQN[115]YTTPSGVIK	SQDYTTPSGVIK	2	648.331
Human	O14786	1 - high confidence	ECSQN[115]YTTPSGVIK	ECSQDYTTPSGVIK	2	792.867
Human	O14786	1 - high confidence	IGYSN[115]N[115]GSDWK	IGYSDDGSDWK	2	621.77
Human	O14786	1 - high confidence	SAN[115]YSVLQSSVSEDFK	SADYSVLQSSVSEDFK	2	881.416
Human	O14786	1 - high confidence	RGPECSQN[115]YTTPSGVIK	RGPECSQDYTTPSGVIK	2	947.955
Human	O14786	1 - high confidence	GPECSQN[115]YTTPSGVIK	GPECSQDYTTPSGVIK	2	869.904
Human	O14786	1 - high confidence	IGYSN[115]NGSDWK	IGYSDNGSDWK	2	621.278
Human	O14786	1 - high confidence	EGFSAN[115]YSVLQSSVSEDFK	EGFSADYSVLQSSVSEDFK	2	1047.98
Human	O14786	1 - high confidence	IGYSNN[115]GSDWK	IGYSNDGSDWK	2	621.278
Human	O14817	1 - high confidence	TDWFEVYN[115]ATR	TDWFEVYDATR	2	701.82
Human	O14817	1 - high confidence	CCGVSN[115]YTDWFEVYN[115]ATR	CCGVSDYTDWFEVYDATR	2	1122.46
Human	O14817	1 - high confidence	GVSN[115]YTDWFEVYN[115]ATR	GVSDYTDWFEVYDATR	2	962.426
Human	O14836	1 - high confidence	SGEVEN[115]NSDNSGR	SGEVEDNSDNSGR	2	683.282
Human	O14917	1 - high confidence	DGGSPPLN[115]STK	DGGSPPLDSTK	2	537.262
Human	O14917	1 - high confidence	VTVLDVNDNAPVIVLPTLQN[115]DTAELQVPR	VTVLDVNDNAPVIVLPTLQDDTAELQVPR	2	1572.85
Human	O14917	1 - high confidence	ETQDEYN[115]VTIVAR	ETQDEYDVTIVAR	2	769.873
Human	O14917	1 - high confidence	DSGAPAHLESN[115]ATVR	DSGAPAHLESDATVR	2	763.369
Human	O14931	1 - high confidence	TLEGSSAFLPCSFN[115]ASQGR	TLEGSSAFLPCSFDASQGR	2	1015.47
Human	O14931	1 - high confidence	VEVLGLGVGTGN[115]GTR	VEVLGLGVGTGDGTR	2	715.389
Human	O15031	1 - high confidence	ISVAGRN[115]CSFQPER	ISVAGRDCSFQPER	2	811.394
Human	O15031	1 - high confidence	TSAQPQN[115]MSR	TSAQPQDMSR	2	560.759
Human	O15031	1 - high confidence	N[115]ETLPLHLYVK	DETLPLHLYVK	2	664.369
Human	O15031	1 - high confidence	LSN[115]ISLR	LSDISLR	2	402.238
Human	O15031	1 - high confidence	HDAN[115]ETLPLHLYVK	HDADETLPLHLYVK	2	825.931
Human	O15031	1 - high confidence	DAN[115]ETLPLHLYVK	DADETLPLHLYVK	2	757.401
Human	O15031	1 - high confidence	VPDPTFEN[115]FTGGVK	VPDPTFEDFTGGVK	2	754.87
Human	O15031	1 - high confidence	GGLN[115]LTAVTVAAEN[115]N[115]HTVAF	GGLDLTAVTVAAEDDHTVAF	2	1001.49
Human	O15031	1 - high confidence	ALCN[115]TTSECPPPVITR	ALCDTTSECPPPVITR	2	908.935
Human	O15031	1 - high confidence	LSHDAN[115]ETLPLHLYV	LSHDADETLPLHLYV	2	861.942
Human	O15031	1 - high confidence	AAENN[115]HTVAFLGTSDGR	AAENDHTVAFLGTSDGR	2	880.917
Human	O15031	1 - high confidence	LSHDAN[115]ETLPLH	LSHDADETLPLH	2	674.334
Human	O15031	1 - high confidence	PMTVVGTDYVFHN[115]DTK	PMTVVGTDYVFHDDTK	2	912.93
Human	O15031	1 - high confidence	VVFLSPAVPEEPEAYN[115]LTVLIEMDGHR	VVFLSPAVPEEPEAYDLTVLIEMDGHR	2	1513.77
Human	O15031	1 - high confidence	LSHDAN[115]ETLPLHL	LSHDADETLPLHL	2	730.876
Human	O15031	1 - high confidence	SKSCVAVTSAQPQN[115]MSRR	SKSCVAVTSAQPQDMSRR	2	1004.49
Human	O15031	1 - high confidence	CN[115]TTSECPPPVITR	CDTTSECPPPVITR	2	816.874
Human	O15031	1 - high confidence	SHDAN[115]ETLPLHLYVK	SHDADETLPLHLYVK	2	869.447
Human	O15031	1 - high confidence	LCN[115]TTSECPPPVITR	LCDTTSECPPPVITR	2	873.416
Human	O15031	1 - high confidence	GGLN[115]LTAVTVAAEN[115]NHTVAF	GGLDLTAVTVAAEDNHTVAF	2	1001
Human	O15031	1 - high confidence	LSHDAN[115]ETLPLHLY	LSHDADETLPLHLY	2	812.407
Human	O15031	1 - high confidence	HVTLYN[115]CSFGR	HVTLYDCSFGR	2	677.817
Human	O15031	1 - high confidence	TPKLSHDAN[115]ETLPLHLYVK	TPKLSHDADETLPLHLYVK	2	1089.09
Human	O15031	1 - high confidence	GGLN[115]LTAVTVAAEN[115]N[115]HTVAFLGTSDGR	GGLDLTAVTVAAEDDHTVAFLGTSDGR	2	1344.66
Human	O15031	1 - high confidence	EYVPDPTFEN[115]FTGGVK	EYVPDPTFEDFTGGVK	2	900.923
Human	O15031	1 - high confidence	GGLNLTAVTVAAEN[115]N[115]HTVAFLGTSDGR	GGLNLTAVTVAAEDDHTVAFLGTSDGR	2	1344.17
Human	O15031	1 - high confidence	PTFEN[115]FTGGVK	PTFEDFTGGVK	2	599.296
Human	O15031	1 - high confidence	PDPTFEN[115]FTGGVK	PDPTFEDFTGGVK	2	705.336
Human	O15031	1 - high confidence	TEAGAFEYVPDPTFEN[115]FTGGVKK	TEAGAFEYVPDPTFEDFTGGVKK	2	1253.1
Human	O15031	1 - high confidence	VAVTSAQPQN[115]MSR	VAVTSAQPQDMSR	2	695.346
Human	O15031	1 - high confidence	CVYEALCN[115]TTSECPPPVITR	CVYEALCDTTSECPPPVITR	2	1184.54
Human	O15031	1 - high confidence	GTDYVFHN[115]DTK	GTDYVFHDDTK	2	649.291
Human	O15031	1 - high confidence	GGLN[115]LTAVTVAAEN[115]NHTVAFLGTSDGR	GGLDLTAVTVAAEDNHTVAFLGTSDGR	2	1344.17
Human	O15031	1 - high confidence	LHVTLYN[115]CSFGR	LHVTLYDCSFGR	2	734.359
Human	O15031	1 - high confidence	VGTDYVFHN[115]DTK	VGTDYVFHDDTK	2	698.826
Human	O15031	1 - high confidence	GGLN[115]LTAVTVAAENN[115]HTVAF	GGLDLTAVTVAAENDHTVAF	2	1001
Human	O15031	1 - high confidence	SIN[115]VTGQGFSLIQR	SIDVTGQGFSLIQR	2	760.91
Human	O15031	1 - high confidence	SKSCVAVTSAQPQN[115]MSR	SKSCVAVTSAQPQDMSR	2	926.441
Human	O15031	1 - high confidence	GGLN[115]LTAVTVAAENN[115]HTVAFLGTSDGR	GGLDLTAVTVAAENDHTVAFLGTSDGR	2	1344.17
Human	O15031	1 - high confidence	EAESLQPMTVVGTDYVFHN[115]DTK	EAESLQPMTVVGTDYVFHDDTK	2	1241.58
Human	O15031	1 - high confidence	ALSN[115]ISLR	ALSDISLR	2	437.756
Human	O15031	1 - high confidence	N[115]CSFQPER	DCSFQPER	2	519.722
Human	O15031	1 - high confidence	TVVGTDYVFHN[115]DTK	TVVGTDYVFHDDTK	2	798.884
Human	O15031	1 - high confidence	TEAGAFEYVPDPTFEN[115]FTGGVK	TEAGAFEYVPDPTFEDFTGGVK	2	1189.05
Human	O15031	1 - high confidence	SCVAVTSAQPQN[115]MSR	SCVAVTSAQPQDMSR	2	818.878
Human	O15031	1 - high confidence	SIN[115]VTGQGF	SIDVTGQGF	2	462.23
Human	O15031	1 - high confidence	LSHDAN[115]ETLPLHLYVK	LSHDADETLPLHLYVK	2	925.989
Human	O15118	2 - putative	YVDPVTN[115]QTK	YVDPVTDQTK	2	583.293
Human	O15118	2 - putative	PVTN[115]QTK	PVTDQTK	2	394.714
Human	O15118	2 - putative	N[115]VTATEDYVDPVTN[115]QTK	DVTATEDYVDPVTDQTK	2	948.942
Human	O15118	2 - putative	VDN[115]ITDQFCN[115]ASVVDPA	VDDITDQFCDASVVDPA	2	933.91
Human	O15118	2 - putative	NYKN[115]PNLTISFTAER	NYKDPNLTISFTAER	2	884.95
Human	O15118	2 - putative	NYKNPN[115]LTISFTAER	NYKNPDLTISFTAER	2	884.95
Human	O15118	2 - putative	ELQYYVGQSFANAMYN[115]ACR	ELQYYVGQSFANAMYDACR	2	1143.5
Human	O15118	2 - putative	DADACN[115]ATNWIEYMFNK	DADACDATNWIEYMFNK	2	1032.43
Human	O15118	2 - putative	NAAQLDN[115]YTR	NAAQLDDYTR	2	583.778
Human	O15118	2 - putative	NPN[115]LTISFTAER	NPDLTISFTAER	2	682.349
Human	O15118	2 - putative	QSQFLN[115]VTATEDYVDPVTN[115]QTK	QSQFLDVTATEDYVDPVTDQTK	2	1250.59
Human	O15118	2 - putative	VDN[115]ITDQFCN[115]ASVVDPACVR	VDDITDQFCDASVVDPACVR	2	1141.51
Human	O15118	2 - putative	LIASN[115]VTETMGIN[115]GSAYR	LIASDVTETMGIDGSAYR	2	949.965
Human	O15230	2 - putative	LEVDAQSN[115]HT	LEVDAQSDHT	2	557.757
Human	O15230	2 - putative	TGFPSCYPTPSSSN[115]DTR	TGFPSCYPTPSSSDDTR	2	937.9
Human	O15230	2 - putative	GLAN[115]ASAPSGEQLLR	GLADASAPSGEQLLR	2	742.892
Human	O15230	2 - putative	LEVDAQSN[115]HTVGPL	LEVDAQSDHTVGPL	2	740.871
Human	O15230	2 - putative	LN[115]TTGVSAGCTADLLVGR	LDTTGVSAGCTADLLVGR	2	903.46
Human	O15230	2 - putative	LVGGPVAGGDPN[115]QTIR	LVGGPVAGGDPDQTIR	2	776.413
Human	O15230	2 - putative	TLSELMSQTGHLGLAN[115]ASAPSGEQLLR	TLSELMSQTGHLGLADASAPSGEQLLR	2	1391.71
Human	O15230	2 - putative	LAN[115]ASAPSGEQLLR	LADASAPSGEQLLR	2	714.381
Human	O15230	2 - putative	DN[115]ATLQATLHAAR	DDATLQATLHAAR	2	691.858
Human	O15230	2 - putative	GIN[115]ASSMAWAR	GIDASSMAWAR	2	582.78
Human	O15230	2 - putative	PGAMN[115]FSYSPLLR	PGAMDFSYSPLLR	2	727.364
Human	O15230	2 - putative	AQQLLAN[115]STALEEAMLQEQQR	AQQLLADSTALEEAMLQEQQR	2	1187.09
Human	O15230	2 - putative	LN[115]ASIADLQSQLR	LDASIADLQSQLR	2	715.389
Human	O15321	1 - high confidence	IIFAN[115]VSVR	IIFADVSVR	2	510.301
Human	O15389	1 - high confidence	PEDHGTN[115]LTCQMK	PEDHGTDLTCQMK	2	766.332
Human	O15389	1 - high confidence	LEEKPLEGN[115]SSQGSFK	LEEKPLEGDSSQGSFK	2	875.931
Human	O15394	1 - high confidence	SHGVQTMVVLNNLEPN[115]TTYEIR	SHGVQTMVVLNNLEPDTTYEIR	2	1258.63
Human	O15394	1 - high confidence	NNNLQILNIN[115]K	NNNLQILNIDK	2	649.86
Human	O15394	1 - high confidence	ANN[115]NLQILNIN[115]K	ANDNLQILNIDK	2	685.87
Human	O15394	1 - high confidence	AMLANNNLQILNIN[115]K	AMLANNNLQILNIDK	2	842.959
Human	O15394	1 - high confidence	ANNNLQILNIN[115]K	ANNNLQILNIDK	2	685.378
Human	O15394	1 - high confidence	FAMLANN[115]NLQILNIN[115]K	FAMLANDNLQILNIDK	2	916.985
Human	O15394	1 - high confidence	YN[115]CTATN[115]HIGTR	YDCTATDHIGTR	2	705.312
Human	O15394	1 - high confidence	LVLPAKN[115]TTNLK	LVLPAKDTTNLK	2	656.898
Human	O15394	1 - high confidence	DKLVLPAKN[115]TTNLK	DKLVLPAKDTTNLK	2	778.459
Human	O15394	1 - high confidence	FAMLANNNLQILNIN[115]K	FAMLANNNLQILNIDK	2	916.493
Human	O15394	1 - high confidence	YN[115]CTATNHIGTR	YDCTATNHIGTR	2	704.82
Human	O15394	1 - high confidence	SFN[115]ATAER	SFDATAER	2	448.712
Human	O15439	1 - high confidence	QSMLN[115]VTVN[115]GGGN[115]VTEK	QSMLDVTVDGGGDVTEK	2	875.915
Human	O15439	1 - high confidence	QSMLN[115]VTVNGGGN[115]VTEK	QSMLDVTVNGGGDVTEK	2	875.423
Human	O15440	1 - high confidence	GN[115]ETSVSDSMK	GDETSVSDSMK	2	578.248
Human	O15455	1 - high confidence	LTQVPDDLPTN[115]ITVLN[115]LTHNQLR	LTQVPDDLPTDITVLDLTHNQLR	2	1309.2
Human	O15455	1 - high confidence	RLPAAN[115]FTR	RLPAADFTR	2	523.794
Human	O15455	1 - high confidence	SEELDIFAN[115]SSLK	SEELDIFADSSLK	2	727.359
Human	O15460	3 - unspecific	TAELLQVAN[115]YGVGGQYEPHFDFSR	TAELLQVADYGVGGQYEPHFDFSR	2	1350.14
Human	O15460	3 - unspecific	TLTN[115]QTEAELATPEGIYER	TLTDQTEAELATPEGIYER	2	1069.02
Human	O15460	3 - unspecific	TLTN[115]QTEAELATPEGIYERPVDYLPER	TLTDQTEAELATPEGIYERPVDYLPER	2	1553.77
Human	O43155	1 - high confidence	IAVISDMAFQN[115]LTSLER	IAVISDMAFQDLTSLER	2	954.993
Human	O43157	1 - high confidence	YTLDPN[115]ITSAGPTK	YTLDPDITSAGPTK	2	739.875
Human	O43184	1 - high confidence	GLIVFEN[115]ESYVLEPMK	GLIVFEDESYVLEPMK	2	934.974
Human	O43194	1 - high confidence	HHEQPETSN[115]MSICTNLSSR	HHEQPETSDMSICTNLSSR	2	1114.99
Human	O43194	1 - high confidence	HHEQPETSN[115]MSICTN[115]LSSR	HHEQPETSDMSICTDLSSR	2	1115.48
Human	O43194	1 - high confidence	HHEQPETSN[115]MSICTN	HHEQPETSDMSICTN	2	893.365
Human	O43286	2 - putative	GPIDIN[115]MSEIGMDYIHELFSK	GPIDIDMSEIGMDYIHELFSK	2	1205.57
Human	O43306	1 - high confidence	LASSN[115]ETFDGLDCPAAGR	LASSDETFDGLDCPAAGR	2	941.421
Human	O43462	1 - high confidence	LDGSTECCNN[115]HSLTDVCFSYR	LDGSTECCNDHSLTDVCFSYR	2	1268.52
Human	O43490	1 - high confidence	EALENMN[115]STLK	EALENMDSTLK	2	625.803
Human	O43490	1 - high confidence	VLN[115]SIGSDIDN[115]VTQR	VLDSIGSDIDDVTQR	2	816.91
Human	O43490	1 - high confidence	VLNSIGSDIDN[115]VTQR	VLNSIGSDIDDVTQR	2	816.418
Human	O43490	1 - high confidence	YILAQYN[115]TTK	YILAQYDTTK	2	608.319
Human	O43505	2 - putative	QAPTN[115]YSR	QAPTDYSR	2	469.225
Human	O43505	2 - putative	VAQPGIN[115]YALGTNVSYPNNLLR	VAQPGIDYALGTNVSYPNNLLR	2	1188.12
Human	O43505	2 - putative	NELVQLYQVGEVRPFYYGLCTPCQAPTN[115]YSR	NELVQLYQVGEVRPFYYGLCTPCQAPTDYSR	2	1862.39
Human	O43505	2 - putative	VAQPGINYALGTN[115]VSYPNNLLR	VAQPGINYALGTDVSYPNNLLR	2	1188.12
Human	O43556	1 - high confidence	LN[115]AIN[115]ITSALDR	LDAIDITSALDR	2	651.852
Human	O43556	1 - high confidence	LNAIN[115]ITSALDR	LNAIDITSALDR	2	651.36
Human	O43567	2 - putative	SKPEN[115]ACEPIVPPPVK	SKPEDACEPIVPPPVK	2	881.959
Human	O43567	2 - putative	NFEN[115]ASQTFDDLPAR	NFEDASQTFDDLPAR	2	863.392
Human	O43567	2 - putative	DILAYNFEN[115]ASQTFDDLPAR	DILAYNFEDASQTFDDLPAR	2	1151.04
Human	O43567	2 - putative	DN[115]SSGTFIVLIR	DDSSGTFIVLIR	2	661.854
Human	O43570	1 - high confidence	TPLEFQGYN[115]LSANK	TPLEFQGYDLSANK	2	791.894
Human	O43570	1 - high confidence	ASLTPLEFQGYN[115]LSANK	ASLTPLEFQGYDLSANK	2	927.471
Human	O43570	1 - high confidence	SLTPLEFQGYN[115]LSANK	SLTPLEFQGYDLSANK	2	891.952
Human	O43570	1 - high confidence	DASLTPLEFQGYN[115]LSANK	DASLTPLEFQGYDLSANK	2	984.984
Human	O43657	1 - high confidence	ALKQYN[115]STGDYR	ALKQYDSTGDYR	2	708.844
Human	O43657	1 - high confidence	QYN[115]STGDYR	QYDSTGDYR	2	552.736
Human	O43688	1 - high confidence	VN[115]CSVYVQLEK	VDCSVYVQLEK	2	670.335
Human	O43699	1 - high confidence	ILQN[115]TSSLPVLEGQALR	ILQDTSSLPVLEGQALR	2	920.515
Human	O43707	3 - unspecific	HTN[115]YTMEHIR	HTDYTMEHIR	2	651.801
Human	O43707	3 - unspecific	ISIEMN[115]GTLEDQLSHLK	ISIEMDGTLEDQLSHLK	2	964.988
Human	O43852	2 - putative	GHDLNEDGLVSWEEYKN[115]ATYGYVLDDPDPDDGFNYK	GHDLNEDGLVSWEEYKDATYGYVLDDPDPDDGFNYK	2	2076.4
Human	O43852	2 - putative	N[115]ATYGYVLDDPDPDDGFNYK	DATYGYVLDDPDPDDGFNYK	2	1140.49
Human	O43897	2 - putative	VIGGN[115]FTGSQR	VIGGDFTGSQR	2	568.791
Human	O43909	2 - putative	N[115]FTLTVTDFYR	DFTLTVTDFYR	2	689.341
Human	O43909	2 - putative	KSDTQNLLYN[115]VSTGR	KSDTQNLLYDVSTGR	2	848.932
Human	O43909	2 - putative	SDTQNLLYN[115]VSTGR	SDTQNLLYDVSTGR	2	784.884
Human	O60243	1 - high confidence	PFMQYN[115]STR	PFMQYDSTR	2	572.761
Human	O60245	1 - high confidence	IDN[115]LTGELSTSER	IDDLTGELSTSER	2	718.352
Human	O60266	1 - high confidence	PGLN[115]GTDR	PGLDGTDR	2	415.707
Human	O60266	1 - high confidence	EHDLPMVALEQMQGFNPGLN[115]GTDR	EHDLPMVALEQMQGFNPGLDGTDR	2	1335.62
Human	O60279	1 - high confidence	VIYGNTDGPSGPFVGKN[115]DSK	VIYGNTDGPSGPFVGKDDSK	2	1027
Human	O60330	1 - high confidence	EQVPSYN[115]ITVTATDR	EQVPSYDITVTATDR	2	847.918
Human	O60449	1 - high confidence	EEYN[115]TTLPQF	EEYDTTLPQF	2	621.783
Human	O60449	1 - high confidence	LLVNESN[115]SWDK	LLVNESDSWDK	2	653.323
Human	O60449	1 - high confidence	TVDCN[115]DNQPGAICYYSGN[115]ETEK	TVDCDDNQPGAICYYSGDETEK	2	1269.01
Human	O60449	1 - high confidence	GHGTAISN[115]ASDVWK	GHGTAISDASDVWK	2	722.35
Human	O60449	1 - high confidence	CSMLIASN[115]ETWK	CSMLIASDETWK	2	720.832
Human	O60449	1 - high confidence	NKIAN[115]ISGDGQK	NKIADISGDGQK	2	623.328
Human	O60449	1 - high confidence	GTNCN[115]LTITSR	GTNCDLTITSR	2	619.299
Human	O60449	1 - high confidence	LIASN[115]ETWK	LIASDETWK	2	531.78
Human	O60449	1 - high confidence	ENN[115]N[115]ITMR	ENDDITMR	2	497.222
Human	O60449	1 - high confidence	ENN[115]NITMR	ENDNITMR	2	496.73
Human	O60449	1 - high confidence	IYEDEVPFGTN[115]CN[115]LTITSR	IYEDEVPFGTDCDLTITSR	2	1116.02
Human	O60449	1 - high confidence	TGTWN[115]FTSCSER	TGTWDFTSCSER	2	723.804
Human	O60449	1 - high confidence	TLTYWDENEPNVPYN[115]K	TLTYWDENEPNVPYDK	2	992.455
Human	O60449	1 - high confidence	TYWDENEPNVPYN[115]K	TYWDENEPNVPYDK	2	885.389
Human	O60449	1 - high confidence	NN[115]SLMWFDK	NDSLMWFDK	2	578.264
Human	O60449	1 - high confidence	FTGTWN[115]FTSCSER	FTGTWDFTSCSER	2	797.339
Human	O60449	1 - high confidence	WDENEPNVPYN[115]K	WDENEPNVPYDK	2	753.334
Human	O60449	1 - high confidence	KPLNN[115]TVELTDVWTY	KPLNDTVELTDVWTY	2	897.454
Human	O60449	1 - high confidence	LVN[115]ESNSWDK	LVDESNSWDK	2	596.781
Human	O60449	1 - high confidence	KPLN[115]NTVELTDVWTY	KPLDNTVELTDVWTY	2	897.454
Human	O60449	1 - high confidence	N[115]NSLMWFDK	DNSLMWFDK	2	578.264
Human	O60449	1 - high confidence	KPLNN[115]TVELTDVWTYSDTR	KPLNDTVELTDVWTYSDTR	2	1127.06
Human	O60449	1 - high confidence	LPFICEKYN[115]VSSLEK	LPFICEKYDVSSLEK	2	914.467
Human	O60449	1 - high confidence	YLLVN[115]ESNSWDK	YLLVDESNSWDK	2	734.854
Human	O60449	1 - high confidence	EEYN[115]TTLPQFMPYEDGIYSVIQK	EEYDTTLPQFMPYEDGIYSVIQK	2	1383.65
Human	O60449	1 - high confidence	LLVN[115]ESNSWDK	LLVDESNSWDK	2	653.323
Human	O60449	1 - high confidence	SPFTGTWN[115]FTSCSER	SPFTGTWDFTSCSER	2	889.381
Human	O60449	1 - high confidence	IYEDEVPFGTNCN[115]LTITSR	IYEDEVPFGTNCDLTITSR	2	1115.52
Human	O60449	1 - high confidence	TVDCNDNQPGAICYYSGN[115]ETEK	TVDCNDNQPGAICYYSGDETEK	2	1268.52
Human	O60449	1 - high confidence	KPLN[115]NTVELTDVWTYSDTR	KPLDNTVELTDVWTYSDTR	2	1127.06
Human	O60449	1 - high confidence	YN[115]VSSLEK	YDVSSLEK	2	470.738
Human	O60449	1 - high confidence	QTLQN[115]ASETVK	QTLQDASETVK	2	610.315
Human	O60449	1 - high confidence	ENNN[115]ITMR	ENNDITMR	2	496.73
Human	O60449	1 - high confidence	DGHGTAISN[115]ASDVWK	DGHGTAISDASDVWK	2	779.863
Human	O60449	1 - high confidence	IAN[115]ISGDGQK	IADISGDGQK	2	502.259
Human	O60462	1 - high confidence	NFTSPN[115]GTIESPGFPEK	NFTSPDGTIESPGFPEK	2	911.931
Human	O60462	1 - high confidence	TGSEDCSKN[115]FTSPN[115]GTIESPGFPEK	TGSEDCSKDFTSPDGTIESPGFPEK	2	1344.59
Human	O60462	1 - high confidence	N[115]FTSPN[115]GTIESPGFPEK	DFTSPDGTIESPGFPEK	2	912.423
Human	O60486	1 - high confidence	SVYGTVVMN[115]R	SVYGTVVMDR	2	563.785
Human	O60486	1 - high confidence	ENDNFN[115]ISK	ENDNFDISK	2	541.246
Human	O60486	1 - high confidence	RPLGN[115]LSR	RPLGDLSR	2	457.267
Human	O60486	1 - high confidence	CEVRPLGN[115]LSR	CEVRPLGDLSR	2	651.338
Human	O60486	1 - high confidence	FN[115]FTNCSSLK	FDFTNCSSLK	2	609.78
Human	O60486	1 - high confidence	VQPIASSTLIHSDLTSVYGTVVMN[115]R	VQPIASSTLIHSDLTSVYGTVVMDR	2	1345.2
Human	O60486	1 - high confidence	SN[115]VIVTGAN[115]FTR	SDVIVTGADFTR	2	640.831
Human	O60486	1 - high confidence	FN[115]FTN[115]CSSLK	FDFTDCSSLK	2	610.272
Human	O60486	1 - high confidence	ASN[115]ITMILK	ASDITMILK	2	496.281
Human	O60486	1 - high confidence	DVIQVSHVLN[115]DTHMK	DVIQVSHVLDDTHMK	2	868.938
Human	O60486	1 - high confidence	N[115]GTEVVSCHPQGSTAGVVYR	DGTEVVSCHPQGSTAGVVYR	2	1060
Human	O60486	1 - high confidence	DQAGN[115]CTEPVSLAPPARPR	DQAGDCTEPVSLAPPARPR	2	1019
Human	O60486	1 - high confidence	DQAGN[115]CTEPVSLAPPAR	DQAGDCTEPVSLAPPAR	2	892.421
Human	O60486	1 - high confidence	GTSTCDKDVIQVSHVLN[115]DTHMK	GTSTCDKDVIQVSHVLDDTHMK	2	1243.59
Human	O60486	1 - high confidence	GACEVRPLGN[115]LSR	GACEVRPLGDLSR	2	715.367
Human	O60486	1 - high confidence	VILGEN[115]LTSNCPEVIYEIK	VILGEDLTSNCPEVIYEIK	2	1096.56
Human	O60486	1 - high confidence	SNVIVTGAN[115]FTR	SNVIVTGADFTR	2	640.339
Human	O60487	1 - high confidence	LQFDDN[115]GTYTCQVK	LQFDDDGTYTCQVK	2	845.378
Human	O60487	1 - high confidence	VLEAVN[115]GTDAR	VLEAVDGTDAR	2	573.296
Human	O60503	1 - high confidence	YVSLCPDSSVLTSPLDAVQN[115]FSSER	YVSLCPDSSVLTSPLDAVQDFSSER	2	1386.66
Human	O60503	1 - high confidence	NPCN[115]SSVPR	NPCDSSVPR	2	516.235
Human	O60503	1 - high confidence	GDSSN[115]LTATAR	GDSSDLTATAR	2	547.263
Human	O60512	2 - putative	VIHQAGN[115]GTFNR	VIHQAGDGTFNR	2	657.834
Human	O60512	2 - putative	PPARPGPLSTAN[115]HTALR	PPARPGPLSTADHTALR	2	878.979
Human	O60512	2 - putative	PGPLSTAN[115]HTALR	PGPLSTADHTALR	2	668.357
Human	O60512	2 - putative	RPPARPGPLSTAN[115]HTALR	RPPARPGPLSTADHTALR	2	957.03
Human	O60512	2 - putative	PARPGPLSTAN[115]HTALR	PARPGPLSTADHTALR	2	830.453
Human	O60512	2 - putative	DVYSN[115]LSHLPGAPGGPPAPQGLPYCPER	DVYSDLSHLPGAPGGPPAPQGLPYCPER	2	1474.21
Human	O60512	2 - putative	ELGPLYTN[115]ITADIGTDPR	ELGPLYTDITADIGTDPR	2	973.992
Human	O60565	2 - putative	AQHN[115]DSEQTQSPQQPGSR	AQHDDSEQTQSPQQPGSR	2	998.444
Human	O60568	2 - putative	IHEN[115]YSR	IHEDYSR	2	460.22
Human	O60568	2 - putative	YIHEN[115]YSR	YIHEDYSR	2	541.752
Human	O60568	2 - putative	QYIHEN[115]YSR	QYIHEDYSR	2	605.781
Human	O60568	2 - putative	EQYIHEN[115]YSR	EQYIHEDYSR	2	670.302
Human	O60568	2 - putative	SAEFFN[115]YTVR	SAEFFDYTVR	2	617.794
Human	O60603	1 - high confidence	N[115]LTNIDISK	DLTNIDISK	2	509.777
Human	O60603	1 - high confidence	SIQN[115]VSHLILH	SIQDVSHLILH	2	631.352
Human	O60603	1 - high confidence	YLN[115]LSSTR	YLDLSSTR	2	477.751
Human	O60635	1 - high confidence	DYGSQEDFTQVWN[115]TTMK	DYGSQEDFTQVWDTTMK	2	1025.94
Human	O60636	1 - high confidence	GKGN[115]GTLITFHSTFQCCGK	GKGDGTLITFHSTFQCCGK	2	1057.5
Human	O60636	1 - high confidence	GKGN[115]GTLITFH	GKGDGTLITFH	2	573.304
Human	O60637	1 - high confidence	GIHN[115]YSDWENTDWFK	GIHDYSDWENTDWFK	2	956.913
Human	O60637	1 - high confidence	SIQKVYKTYN[115]GTNPDAASR	SIQKVYKTYDGTNPDAASR	2	1057.53
Human	O60637	1 - high confidence	YN[115]GTNPDAASR	YDGTNPDAASR	2	583.76
Human	O60637	1 - high confidence	ETASN[115]CN[115]GSLAHPSDLYAEGCEALVVK	ETASDCDGSLAHPSDLYAEGCEALVVK	2	1447.65
Human	O60637	1 - high confidence	TYN[115]GTN[115]PDAASR	TYDGTDPDAASR	2	634.776
Human	O60637	1 - high confidence	N[115]QSVPLSCCR	DQSVPLSCCR	2	611.274
Human	O60637	1 - high confidence	ETASN[115]CNGSLAHPSDLYAEGCEALVVK	ETASDCNGSLAHPSDLYAEGCEALVVK	2	1447.16
Human	O60637	1 - high confidence	VYKTYN[115]GTNPDAASR	VYKTYDGTNPDAASR	2	829.397
Human	O60637	1 - high confidence	ETASNCN[115]GSLAHPSDLYAEGCEALVVK	ETASNCDGSLAHPSDLYAEGCEALVVK	2	1447.16
Human	O60637	1 - high confidence	TYN[115]GTNPDAASR	TYDGTNPDAASR	2	634.284
Human	O60656	2 - putative	PSNLAN[115]NTILVK	PSNLADNTILVK	2	642.865
Human	O60656	2 - putative	YTGTRPSNLAN[115]NTILVK	YTGTRPSNLADNTILVK	2	932.005
Human	O60779	1 - high confidence	LGPDKN[115]LTER	LGPDKDLTER	2	572.307
Human	O60779	1 - high confidence	LLGPDKN[115]LTER	LLGPDKDLTER	2	628.849
Human	O60896	1 - high confidence	QFFSN[115]CTVDR	QFFSDCTVDR	2	637.78
Human	O60911	3 - unspecific	YRPENSVAN[115]DTGFTVVAPGK	YRPENSVADDTGFTVVAPGK	2	1062.03
Human	O60931	2 - putative	LHGN[115]HSN[115]QTGPR	LHGDHSDQTGPR	2	660.311
Human	O60939	1 - high confidence	MEVTVPATLNVLN[115]GSDAR	MEVTVPATLNVLDGSDAR	2	944.481
Human	O75015	1 - high confidence	TVN[115]DSGEYR	TVDDSGEYR	2	521.231
Human	O75015	1 - high confidence	FIDAATVN[115]DSGEYR	FIDAATVDDSGEYR	2	779.858
Human	O75015	1 - high confidence	ATVN[115]DSGEYR	ATVDDSGEYR	2	556.749
Human	O75015	1 - high confidence	CQTN[115]LSTLSDPVQLEVH	CQTDLSTLSDPVQLEVH	2	971.468
Human	O75019	1 - high confidence	GLSQAN[115]FTLGPVSR	GLSQADFTLGPVSR	2	724.384
Human	O75019	1 - high confidence	AGLSQAN[115]FTLGPVSR	AGLSQADFTLGPVSR	2	759.902
Human	O75051	1 - high confidence	LTGN[115]LTIQVAHK	LTGDLTIQVAHK	2	648.373
Human	O75054	1 - high confidence	VQGN[115]STLLH	VQGDSTLLH	2	485.257
Human	O75054	1 - high confidence	ASLQVDTVVPN[115]ATVSEK	ASLQVDTVVPDATVSEK	2	879.963
Human	O75054	1 - high confidence	PDASLQVDTVVPN[115]ATVSEK	PDASLQVDTVVPDATVSEK	2	986.002
Human	O75054	1 - high confidence	SSISVEVASN[115]ASVILEGEDLR	SSISVEVASDASVILEGEDLR	2	1088.56
Human	O75054	1 - high confidence	VMRPDASLQVDTVVPN[115]ATVSEK	VMRPDASLQVDTVVPDATVSEK	2	1179.11
Human	O75054	1 - high confidence	VQGN[115]STLLHITDLQ	VQGDSTLLHITDLQ	2	770.407
Human	O75054	1 - high confidence	SQAQGN[115]LSVLETR	SQAQGDLSVLETR	2	702.363
Human	O75054	1 - high confidence	DTGN[115]YSCHVEEWLPSPQK	DTGDYSCHVEEWLPSPQK	2	1074.47
Human	O75054	1 - high confidence	VQGN[115]STLLHITDLQA	VQGDSTLLHITDLQA	2	805.926
Human	O75054	1 - high confidence	GN[115]STLLHITDLQAR	GDSTLLHITDLQAR	2	770.413
Human	O75054	1 - high confidence	QVQLECVVLN[115]R	QVQLECVVLDR	2	679.861
Human	O75054	1 - high confidence	RAEDTAGQTALTVMRPDASLQVDTVVPN[115]ATVSEK	RAEDTAGQTALTVMRPDASLQVDTVVPDATVSEK	2	1786.4
Human	O75054	1 - high confidence	TLTLVENKPIQLN[115]CSVK	TLTLVENKPIQLDCSVK	2	979.538
Human	O75054	1 - high confidence	KNYN[115]NTWTR	KNYDNTWTR	2	599.289
Human	O75054	1 - high confidence	NYN[115]NTWTR	NYDNTWTR	2	535.242
Human	O75054	1 - high confidence	LTVLQASPQDTGN[115]YSCHVEEWLPSPQK	LTVLQASPQDTGDYSCHVEEWLPSPQK	2	1543.24
Human	O75054	1 - high confidence	TVMRPDASLQVDTVVPN[115]ATVSEK	TVMRPDASLQVDTVVPDATVSEK	2	1229.63
Human	O75054	1 - high confidence	AEDTAGQTALTVMRPDASLQVDTVVPN[115]ATVSEK	AEDTAGQTALTVMRPDASLQVDTVVPDATVSEK	2	1708.35
Human	O75054	1 - high confidence	VQGN[115]STLLHITDLQAR	VQGDSTLLHITDLQAR	2	883.976
Human	O75054	1 - high confidence	LSQAQGN[115]LSVLETR	LSQAQGDLSVLETR	2	758.905
Human	O75063	2 - putative	LTVGN[115]NTCFYGK	LTVGDNTCFYGK	2	687.825
Human	O75071	1 - high confidence	VWIN[115]ITEMNK	VWIDITEMNK	2	624.821
Human	O75071	1 - high confidence	LEGMN[115]ETVSN[115]LTQR	LEGMDETVSDLTQR	2	797.378
Human	O75072	2 - putative	NFEQVKN[115]TSHGSTSQCK	NFEQVKDTSHGSTSQCK	2	976.945
Human	O75094	2 - putative	DLEILTLNNNN[115]ISR	DLEILTLNNNDISR	2	815.429
Human	O75096	1 - high confidence	ANLN[115]GSNVEEVVSTGLESPGGLAVDWVHDK	ANLDGSNVEEVVSTGLESPGGLAVDWVHDK	2	1547.75
Human	O75096	1 - high confidence	ADLN[115]GSNMETVIGR	ADLDGSNMETVIGR	2	739.354
Human	O75096	1 - high confidence	VLIN[115]NSLDEPR	VLIDNSLDEPR	2	635.839
Human	O75121	1 - high confidence	WQMHDSGLLN[115]ITK	WQMHDSGLLDITK	2	772.385
Human	O75144	1 - high confidence	HIPQN[115]SSLEN[115]VDSR	HIPQDSSLEDVDSR	2	799.379
Human	O75144	1 - high confidence	HIPQNSSLEN[115]VDSR	HIPQNSSLEDVDSR	2	798.887
Human	O75144	1 - high confidence	TDNSLLDQALQN[115]DTVF	TDNSLLDQALQDDTVF	2	897.926
Human	O75144	1 - high confidence	IPQN[115]SSLENVDSR	IPQDSSLENVDSR	2	730.358
Human	O75144	1 - high confidence	LLQQN[115]LTVGSQTGNDIGER	LLQQDLTVGSQTGNDIGER	2	1022.52
Human	O75144	1 - high confidence	TDNSLLDQALQN[115]DTVFLN[115]MR	TDNSLLDQALQDDTVFLDMR	2	1155.55
Human	O75144	1 - high confidence	PNVYWIN[115]K	PNVYWIDK	2	517.772
Human	O75144	1 - high confidence	HIPQN[115]SSLENVDSR	HIPQDSSLENVDSR	2	798.887
Human	O75144	1 - high confidence	TDNSLLDQALQN[115]DTVFLNMR	TDNSLLDQALQDDTVFLNMR	2	1155.06
Human	O75144	1 - high confidence	TVVTYHIPQN[115]SSLENVDSR	TVVTYHIPQDSSLENVDSR	2	1080.54
Human	O75144	1 - high confidence	LFN[115]VTPQDEQK	LFDVTPQDEQK	2	660.331
Human	O75197	1 - high confidence	IEVAN[115]LN[115]GTSR	IEVADLDGTSR	2	588.302
Human	O75197	1 - high confidence	IEVANLN[115]GTSR	IEVANLDGTSR	2	587.81
Human	O75326	1 - high confidence	SCWNLVN[115]GTVVPLGEMR	SCWNLVDGTVVPLGEMR	2	966.972
Human	O75326	1 - high confidence	PEAPLN[115]VSR	PEAPLDVSR	2	492.264
Human	O75326	1 - high confidence	LVN[115]GTVVPLGEMR	LVDGTVVPLGEMR	2	693.38
Human	O75326	1 - high confidence	HPSCWNLVN[115]GTVVPLGEMR	HPSCWNLVDGTVVPLGEMR	2	1084.03
Human	O75326	1 - high confidence	PSCWNLVN[115]GTVVPLGEMR	PSCWNLVDGTVVPLGEMR	2	1015.5
Human	O75326	1 - high confidence	EDNPDKNPEAPLN[115]VSR	EDNPDKNPEAPLDVSR	2	898.429
Human	O75387	1 - high confidence	NEGFYSSTCPAESSTN[115]TTQDEQR	NEGFYSSTCPAESSTDTTQDEQR	2	1305.53
Human	O75387	1 - high confidence	SSTCPAESSTN[115]TTQDEQR	SSTCPAESSTDTTQDEQR	2	1000.41
Human	O75387	1 - high confidence	STCPAESSTN[115]TTQDEQR	STCPAESSTDTTQDEQR	2	956.898
Human	O75396	2 - putative	ANN[115]LSSLSK	ANDLSSLSK	2	467.749
Human	O75462	2 - putative	VVDDVSN[115]QTSCR	VVDDVSDQTSCR	2	690.81
Human	O75477	2 - putative	N[115]YTADYDK	DYTADYDK	2	495.709
Human	O75487	1 - high confidence	FDYN[115]ATDHAGK	FDYDATDHAGK	2	620.27
Human	O75487	1 - high confidence	EFDYN[115]ATDHAGK	EFDYDATDHAGK	2	684.792
Human	O75503	3 - unspecific	NIETN[115]YTR	NIETDYTR	2	506.244
Human	O75509	1 - high confidence	SIQEGTVPDN[115]TSSAR	SIQEGTVPDDTSSAR	2	781.871
Human	O75509	1 - high confidence	PAGTYVSEHCTN[115]TSLR	PAGTYVSEHCTDTSLR	2	897.413
Human	O75509	1 - high confidence	VLSSIQEGTVPDN[115]TSSAR	VLSSIQEGTVPDDTSSAR	2	931.464
Human	O75578	1 - high confidence	LNGSN[115]TQCQVVR	LNGSDTQCQVVR	2	688.836
Human	O75578	1 - high confidence	LN[115]GSNTQCQVVR	LDGSNTQCQVVR	2	688.836
Human	O75629	2 - putative	VN[115]ETEMDIAK	VDETEMDIAK	2	575.771
Human	O75718	2 - putative	DTWGLSDEHFQPRPEAVQFFN[115]VTTLQK	DTWGLSDEHFQPRPEAVQFFDVTTLQK	2	1596.28
Human	O75718	2 - putative	AVQFFN[115]VTTLQK	AVQFFDVTTLQK	2	698.88
Human	O75718	2 - putative	N[115]CSAAPQPEPAAGLASYPELR	DCSAAPQPEPAAGLASYPELR	2	1100.52
Human	O75718	2 - putative	PEAVQFFN[115]VTTLQK	PEAVQFFDVTTLQK	2	811.928
Human	O75882	1 - high confidence	VPVPAN[115]QSFWTR	VPVPADQSFWTR	2	701.862
Human	O75882	1 - high confidence	VFHIHN[115]ESWVLLTPK	VFHIHDESWVLLTPK	2	910.991
Human	O75882	1 - high confidence	CIN[115]QSICEK	CIDQSICEK	2	576.758
Human	O75882	1 - high confidence	AATCINPLN[115]GSVCER	AATCINPLDGSVCER	2	831.885
Human	O75882	1 - high confidence	ISN[115]SSDTVECECSENWK	ISDSSDTVECECSENWK	2	1023.41
Human	O75882	1 - high confidence	IDSTGN[115]VTNELR	IDSTGDVTNELR	2	660.329
Human	O75882	1 - high confidence	GICN[115]SSDVR	GICDSSDVR	2	504.727
Human	O75882	1 - high confidence	DLDMFIN[115]ASK	DLDMFIDASK	2	577.777
Human	O75954	1 - high confidence	N[115]ATTPLWR	DATTPLWR	2	480.254
Human	O75976	1 - high confidence	GINHN[115]ITTGR	GINHDITTGR	2	542.284
Human	O75976	1 - high confidence	N[115]NSNNFDLNR	DNSNNFDLNR	2	604.771
Human	O75976	1 - high confidence	GKDLDTDFTN[115]NASQPETK	GKDLDTDFTDNASQPETK	2	991.456
Human	O75976	1 - high confidence	GLVMNYPHITN[115]LTNLGQSTEYR	GLVMNYPHITDLTNLGQSTEYR	2	1261.62
Human	O75976	1 - high confidence	DSITGSGLENATISVAGIN[115]HN[115]ITTGR	DSITGSGLENATISVAGIDHDITTGR	2	1300.65
Human	O75976	1 - high confidence	FAN[115]EYPN[115]ITR	FADEYPDITR	2	613.791
Human	O75976	1 - high confidence	GILN[115]ATISVAEINHPVTTYK	GILDATISVAEINHPVTTYK	2	1071.58
Human	O75976	1 - high confidence	HIWSLEISNKPN[115]VSEPEEPK	HIWSLEISNKPDVSEPEEPK	2	1167.59
Human	O75976	1 - high confidence	ITN[115]LTNLGQSTEYR	ITDLTNLGQSTEYR	2	805.908
Human	O75976	1 - high confidence	SEGAIQVN[115]FTLVR	SEGAIQVDFTLVR	2	717.886
Human	O75976	1 - high confidence	DLDTDFTN[115]N[115]ASQPETK	DLDTDFTDDASQPETK	2	899.39
Human	O75976	1 - high confidence	GKDLDTDFTNN[115]ASQPETK	GKDLDTDFTNDASQPETK	2	991.456
Human	O75976	1 - high confidence	DSITGSGLEN[115]ATISVAGINHN[115]ITTGR	DSITGSGLEDATISVAGINHDITTGR	2	1300.65
Human	O75976	1 - high confidence	LLN[115]TTDVYLLPSLNPDGFER	LLDTTDVYLLPSLNPDGFER	2	1139.59
Human	O75976	1 - high confidence	DLDTDFTNN[115]ASQPETK	DLDTDFTNDASQPETK	2	898.898
Human	O75976	1 - high confidence	FANEYPN[115]ITR	FANEYPDITR	2	613.299
Human	O76021	3 - unspecific	EINDCIGGTVLN[115]ISK	EINDCIGGTVLDISK	2	817.412
Human	O76082	1 - high confidence	N[115]FSALGLEPGR	DFSALGLEPGR	2	581.302
Human	O76082	1 - high confidence	IAN[115]FSALGLEPGR	IADFSALGLEPGR	2	673.362
Human	O76082	1 - high confidence	PDAAN[115]LSSAWR	PDAADLSSAWR	2	594.789
Human	O76082	1 - high confidence	N[115]HTVPLR	DHTVPLR	2	419.236
Human	O76082	1 - high confidence	VPDAAN[115]LSSAWR	VPDAADLSSAWR	2	644.323
Human	O76082	1 - high confidence	LATIAN[115]FSALGLEPGR	LATIADFSALGLEPGR	2	815.947
Human	O94813	2 - putative	DLEVLTLNNN[115]NITR	DLEVLTLNNDNITR	2	815.429
Human	O94813	2 - putative	LDLN[115]GN[115]N[115]ITR	LDLDGDDITR	2	566.781
Human	O94813	2 - putative	LDLN[115]GN[115]NITR	LDLDGDNITR	2	566.289
Human	O94813	2 - putative	ITCVGN[115]DSFIGLSSVR	ITCVGDDSFIGLSSVR	2	863.43
Human	O94813	2 - putative	DLEVLTLNNNN[115]ITR	DLEVLTLNNNDITR	2	815.429
Human	O94813	2 - putative	LDLN[115]GNN[115]ITR	LDLDGNDITR	2	566.289
Human	O94813	2 - putative	LDLNGNN[115]ITR	LDLNGNDITR	2	565.797
Human	O94856	1 - high confidence	NGQGSNLDGGNYHVYEN[115]GSLEIK	NGQGSNLDGGNYHVYEDGSLEIK	2	1233.57
Human	O94856	1 - high confidence	EAWNN[115]VTVWGSR	EAWNDVTVWGSR	2	710.339
Human	O94856	1 - high confidence	QIVEN[115]FSPN[115]QTK	QIVEDFSPDQTK	2	703.847
Human	O94856	1 - high confidence	QIVENFSPN[115]QTK	QIVENFSPDQTK	2	703.355
Human	O94856	1 - high confidence	YVAFN[115]GTK	YVAFDGTK	2	450.73
Human	O94886	1 - high confidence	DRPN[115]DSYCYNSAK	DRPDDSYCYNSAK	2	795.831
Human	O94886	1 - high confidence	LGLGDRPN[115]DSYCYNSAK	LGLGDRPDDSYCYNSAK	2	965.937
Human	O94886	1 - high confidence	LGDRPN[115]DSYCYNSAK	LGDRPDDSYCYNSAK	2	880.884
Human	O94901	3 - unspecific	TLSPTGN[115]ISSAPK	TLSPTGDISSAPK	2	637.338
Human	O94901	3 - unspecific	N[115]VTHHVSVTK	DVTHHVSVTK	2	561.802
Human	O94911	1 - high confidence	FSVVYTPVTN[115]TTQQIMNK	FSVVYTPVTDTTQQIMNK	2	1036.53
Human	O94911	1 - high confidence	VDTFN[115]ESR	VDTFDESR	2	484.723
Human	O94923	2 - putative	GFLDN[115]ITISTTAH	GFLDDITISTTAH	2	695.849
Human	O94923	2 - putative	N[115]LTEKPPHIEVYETAEDRDK	DLTEKPPHIEVYETAEDRDK	2	1193.09
Human	O94923	2 - putative	N[115]LTEKPPHIEVYETAEDR	DLTEKPPHIEVYETAEDR	2	1071.52
Human	O94933	1 - high confidence	EN[115]HSN[115]YR	EDHSDYR	2	461.192
Human	O95084	2 - putative	GAN[115]DSTSAMPEQMK	GADDSTSAMPEQMK	2	734.311
Human	O95136	1 - high confidence	QEHYN[115]YTK	QEHYDYTK	2	542.244
Human	O95136	1 - high confidence	VQEHYN[115]YTK	VQEHYDYTK	2	591.778
Human	O95158	2 - putative	HN[115]SSSLGN[115]LSVSIVPPSK	HDSSSLGDLSVSIVPPSK	2	912.974
Human	O95183	1 - high confidence	SDQLLDMSSTFN[115]K	SDQLLDMSSTFDK	2	743.843
Human	O95185	1 - high confidence	LSDTAN[115]YTCVAK	LSDTADYTCVAK	2	672.314
Human	O95196	1 - high confidence	GSPAWEPPAN[115]DTR	GSPAWEPPADDTR	2	699.821
Human	O95196	1 - high confidence	DLASSEN[115]GTECR	DLASSEDGTECR	2	670.278
Human	O95274	1 - high confidence	ALDPAGN[115]ESAYPPNGVECYSCVGLSR	ALDPAGDESAYPPNGVECYSCVGLSR	2	1392.62
Human	O95274	1 - high confidence	AAN[115]VTVSLPVR	AADVTVSLPVR	2	564.328
Human	O95274	1 - high confidence	ALDPAGN[115]ESAYPPN[115]GVECY	ALDPAGDESAYPPDGVECY	2	1013.43
Human	O95274	1 - high confidence	PPVVSCYN[115]ASDHVYK	PPVVSCYDASDHVYK	2	868.904
Human	O95274	1 - high confidence	GCFDGN[115]VTLTAAN[115]VTVSLPVR	GCFDGDVTLTAADVTVSLPVR	2	1097.05
Human	O95274	1 - high confidence	EACQGTSPPVVSCYN[115]ASDHVYK	EACQGTSPPVVSCYDASDHVYK	2	1235.54
Human	O95297	1 - high confidence	FVAN[115]GTQGK	FVADGTQGK	2	461.738
Human	O95297	1 - high confidence	DASINIEN[115]MQFIHN[115]GTYICDVK	DASINIEDMQFIHDGTYICDVK	2	1292.59
Human	O95297	1 - high confidence	IFVAN[115]GTQGK	IFVADGTQGK	2	518.28
Human	O95297	1 - high confidence	IHN[115]GTYICDVK	IHDGTYICDVK	2	660.819
Human	O95297	1 - high confidence	LEVYTPKEIFVAN[115]GTQGK	LEVYTPKEIFVADGTQGK	2	998.028
Human	O95297	1 - high confidence	FIHN[115]GTYICDVK	FIHDGTYICDVK	2	734.353
Human	O95297	1 - high confidence	DASINIENMQFIHN[115]GTYICDVK	DASINIENMQFIHDGTYICDVK	2	1292.1
Human	O95297	1 - high confidence	EIFVAN[115]GTQGK	EIFVADGTQGK	2	582.801
Human	O95302	3 - unspecific	TYN[115]IVLGSGQVVLGMDMGLR	TYDIVLGSGQVVLGMDMGLR	2	1062.55
Human	O95302	3 - unspecific	YHYN[115]GTFLDGTLFDSSHNR	YHYDGTFLDGTLFDSSHNR	2	1123
Human	O95302	3 - unspecific	YHYN[115]GTLLDGTLFDSSYSR	YHYDGTLLDGTLFDSSYSR	2	1105.51
Human	O95427	1 - high confidence	ENPVEFDSLFN[115]ESK	ENPVEFDSLFDESK	2	828.378
Human	O95477	1 - high confidence	HPEDVQSSN[115]GSVY	HPEDVQSSDGSVY	2	710.308
Human	O95477	1 - high confidence	PEDVQSSN[115]GSVYTWR	PEDVQSSDGSVYTWR	2	863.392
Human	O95477	1 - high confidence	LQDFLVDN[115]ETFSGFLYHN[115]LSLPK	LQDFLVDDETFSGFLYHDLSLPK	2	1350.17
Human	O95477	1 - high confidence	LEPIATEVWLIN[115]K	LEPIATEVWLIDK	2	763.93
Human	O95477	1 - high confidence	HPEDVQSSN[115]GSVYTWR	HPEDVQSSDGSVYTWR	2	931.922
Human	O95477	1 - high confidence	EAFN[115]ETNQAIR	EAFDETNQAIR	2	647.31
Human	O95477	1 - high confidence	TLN[115]STSPFPSK	TLDSTSPFPSK	2	590.301
Human	O95490	1 - high confidence	GPDLSN[115]CTSH	GPDLSDCTSH	2	544.722
Human	O95490	1 - high confidence	N[115]STIAVNSHVISVSINK	DSTIAVNSHVISVSINK	2	892.484
Human	O95490	1 - high confidence	NAN[115]CSFWN[115]YSER	NADCSFWDYSER	2	775.307
Human	O95490	1 - high confidence	SVYQDN[115]ESETGK	SVYQDDESETGK	2	679.294
Human	O95490	1 - high confidence	GPDLSN[115]CTSHWVNQLAQK	GPDLSDCTSHWVNQLAQK	2	1028.48
Human	O95490	1 - high confidence	GPDLSN[115]CTSHWVN	GPDLSDCTSHWVN	2	744.318
Human	O95490	1 - high confidence	SLGQFLSTEN[115]ATIK	SLGQFLSTEDATIK	2	755.396
Human	O95497	1 - high confidence	TGSGIYAPN[115]SSR	TGSGIYAPDSSR	2	605.792
Human	O95497	1 - high confidence	VYEHAAILPN[115]ATLTPVSR	VYEHAAILPDATLTPVSR	2	977.029
Human	O95497	1 - high confidence	ILPN[115]ATLTPVSR	ILPDATLTPVSR	2	641.875
Human	O95497	1 - high confidence	AAILPN[115]ATLTPVSR	AAILPDATLTPVSR	2	712.912
Human	O95497	1 - high confidence	LTGVAGN[115]YTVCQK	LTGVAGDYTVCQK	2	706.351
Human	O95497	1 - high confidence	MTGSGIYAPN[115]SSR	MTGSGIYAPDSSR	2	671.312
Human	O95498	1 - high confidence	TTN[115]LTTCGRPVETASTR	TTDLTTCGRPVETASTR	2	933.458
Human	O95498	1 - high confidence	TTN[115]LTTCGR	TTDLTTCGR	2	512.743
Human	O95754	1 - high confidence	TEVTQVN[115]TTNCGR	TEVTQVDTTNCGR	2	740.841
Human	O95841	2 - putative	ILN[115]VTTEMLK	ILDVTTEMLK	2	581.826
Human	O95857	1 - high confidence	SVN[115]PN[115]DTCLASCVK	SVDPDDTCLASCVK	2	783.845
Human	O95857	1 - high confidence	NPN[115]DTCLASCVK	NPDDTCLASCVK	2	690.303
Human	O95857	1 - high confidence	PN[115]DTCLASCVK	PDDTCLASCVK	2	633.282
Human	O95857	1 - high confidence	SVNPN[115]DTCLASCVK	SVNPDDTCLASCVK	2	783.353
Human	O95858	1 - high confidence	N[115]TTEVVN[115]TMCGYK	DTTEVVDTMCGYK	2	759.829
Human	O95858	1 - high confidence	N[115]TTEVVNTMCGYK	DTTEVVNTMCGYK	2	759.337
Human	O95866	1 - high confidence	N[115]LSCGGVSHPIR	DLSCGGVSHPIR	2	649.323
Human	O95866	1 - high confidence	VN[115]LSCGGVSHPI	VDLSCGGVSHPI	2	620.806
Human	O95866	1 - high confidence	VN[115]LSCGGVSHPIR	VDLSCGGVSHPIR	2	698.857
Human	O95971	1 - high confidence	GN[115]YTVTGLK	GDYTVTGLK	2	477.254
Human	O95971	1 - high confidence	TETGN[115]YTVTGLK	TETGDYTVTGLK	2	642.823
Human	O95971	1 - high confidence	FTETGN[115]YTVTGLK	FTETGDYTVTGLK	2	716.357
Human	O95971	1 - high confidence	SILFTETGN[115]YTVTGLK	SILFTETGDYTVTGLK	2	872.957
Human	O95971	1 - high confidence	IN[115]ITSSASQEGTR	IDITSSASQEGTR	2	682.839
Human	O95977	1 - high confidence	IVLHYN[115]HSGR	IVLHYDHSGR	2	598.815
Human	O95977	1 - high confidence	LHYN[115]HSGR	LHYDHSGR	2	492.739
Human	O95977	1 - high confidence	VLHYN[115]HSGR	VLHYDHSGR	2	542.273
Human	O95977	1 - high confidence	LIVLHYN[115]HSGR	LIVLHYDHSGR	2	655.357
Human	O95980	1 - high confidence	GGLAPGSAGALCCN[115]HSK	GGLAPGSAGALCCDHSK	2	829.378
Human	O95980	1 - high confidence	N[115]LTYCTNFNNRPTELFR	DLTYCTNFNNRPTELFR	2	1081.01
Human	O96005	1 - high confidence	YYPIN[115]ESLASLPLR	YYPIDESLASLPLR	2	818.936
Human	O96005	1 - high confidence	PIN[115]ESLASLPLR	PIDESLASLPLR	2	655.872
Human	O96005	1 - high confidence	AEDYGPVEVISHWHPN[115]ITIN	AEDYGPVEVISHWHPDITIN	2	1146.55
Human	O96005	1 - high confidence	YPIN[115]ESLASLPLR	YPIDESLASLPLR	2	737.404
Human	O96005	1 - high confidence	DYYPIN[115]ESLASLPLR	DYYPIDESLASLPLR	2	876.449
Human	O96014	2 - putative	TPSALALN[115]QTQH	TPSALALDQTQH	2	641.328
Human	P00450	2 - putative	ELHHLQEQN[115]VSNAFLDKGEFYIGSK	ELHHLQEQDVSNAFLDKGEFYIGSK	2	1452.71
Human	P00450	2 - putative	ELHHLQEQNVSN[115]AFLDKGEFYIGSK	ELHHLQEQNVSDAFLDKGEFYIGSK	2	1452.71
Human	P00450	2 - putative	ELHHLQEQN[115]VSNAFLDK	ELHHLQEQDVSNAFLDK	2	1012
Human	P00450	2 - putative	EN[115]LTAPGSDSAVFFEQGTTR	EDLTAPGSDSAVFFEQGTTR	2	1064.5
Human	P00450	2 - putative	EHEGAIYPDN[115]TTDFQR	EHEGAIYPDDTTDFQR	2	947.419
Human	P00488	2 - putative	YTITAYLSAN[115]ITFYTGVPK	YTITAYLSADITFYTGVPK	2	1062.55
Human	P00533	1 - high confidence	ITGFLLIQAWPEN[115]R	ITGFLLIQAWPEDR	2	829.952
Human	P00533	1 - high confidence	TVKEITGFLLIQAWPEN[115]R	TVKEITGFLLIQAWPEDR	2	1058.58
Human	P00533	1 - high confidence	TKQHGQFSLAVVSLN[115]ITSLGLR	TKQHGQFSLAVVSLDITSLGLR	2	1185.66
Human	P00533	1 - high confidence	N[115]CTSISGDLHILPVAF	DCTSISGDLHILPVAF	2	872.935
Human	P00533	1 - high confidence	TCPAGVMGEN[115]NTLVWKY	TCPAGVMGEDNTLVWKY	2	970.951
Human	P00533	1 - high confidence	LIQAWPEN[115]R	LIQAWPEDR	2	564.299
Human	P00533	1 - high confidence	N[115]CTSISGDLHIL	DCTSISGDLHIL	2	665.822
Human	P00533	1 - high confidence	MFNN[115]CEVVLGNLEITYVQR	MFNDCEVVLGNLEITYVQR	2	1150.56
Human	P00533	1 - high confidence	TGFLLIQAWPEN[115]R	TGFLLIQAWPEDR	2	773.41
Human	P00533	1 - high confidence	LSIN[115]ATNIK	LSIDATNIK	2	487.782
Human	P00533	1 - high confidence	IQAWPEN[115]R	IQAWPEDR	2	507.757
Human	P00533	1 - high confidence	QHGQFSLAVVSLN[115]ITSLGLR	QHGQFSLAVVSLDITSLGLR	2	1071.09
Human	P00533	1 - high confidence	LN[115]ITSLGLR	LDITSLGLR	2	494.298
Human	P00533	1 - high confidence	YADAGHVCHLCHPN[115]CTYGC	YADAGHVCHLCHPDCTYGC	2	1146.94
Human	P00533	1 - high confidence	IQCHPECLPQAMN[115]ITCTGR	IQCHPECLPQAMDITCTGR	2	1144.01
Human	P00533	1 - high confidence	LPQAMN[115]ITCTGR	LPQAMDITCTGR	2	681.832
Human	P00533	1 - high confidence	VSLN[115]ITSLGLR	VSLDITSLGLR	2	587.349
Human	P00533	1 - high confidence	DIVSSDFLSNMSMDFQN[115]HLGSCQK	DIVSSDFLSNMSMDFQDHLGSCQK	2	1381.1
Human	P00533	1 - high confidence	GNMYYEN[115]SYALAVLSNYDAN[115]KTGLK	GNMYYEDSYALAVLSNYDADKTGLK	2	1401.16
Human	P00533	1 - high confidence	LCHPN[115]CTYGCTGPGLEGCPTN[115]GPK	LCHPDCTYGCTGPGLEGCPTDGPK	2	1325.05
Human	P00533	1 - high confidence	MFN[115]NCEVVLGN[115]LEITYVQR	MFDNCEVVLGDLEITYVQR	2	1151.05
Human	P00533	1 - high confidence	ALAVLSNYDAN[115]K	ALAVLSNYDADK	2	640.333
Human	P00533	1 - high confidence	PAGVMGENN[115]TLVWK	PAGVMGENDTLVWK	2	758.88
Human	P00533	1 - high confidence	SNYDAN[115]KTGLK	SNYDADKTGLK	2	606.302
Human	P00533	1 - high confidence	DIVSSDFLSN[115]MSMDFQNH	DIVSSDFLSDMSMDFQNH	2	1044.44
Human	P00533	1 - high confidence	LCHPN[115]CTYGCTGPGLEGCPTNGPK	LCHPDCTYGCTGPGLEGCPTNGPK	2	1324.56
Human	P00533	1 - high confidence	SLAVVSLN[115]ITSLGLR	SLAVVSLDITSLGLR	2	772.459
Human	P00533	1 - high confidence	SLN[115]ITSLGLR	SLDITSLGLR	2	537.814
Human	P00533	1 - high confidence	FVENSECIQCHPECLPQAMN[115]ITCTGR	FVENSECIQCHPECLPQAMDITCTGR	2	1576.67
Human	P00533	1 - high confidence	AMN[115]ITCTGR	AMDITCTGR	2	512.734
Human	P00533	1 - high confidence	GNMYYENSYALAVLSNYDAN[115]K	GNMYYENSYALAVLSNYDADK	2	1201.04
Human	P00533	1 - high confidence	MFN[115]NCEVVLGNLEITYVQR	MFDNCEVVLGNLEITYVQR	2	1150.56
Human	P00533	1 - high confidence	SECIQCHPECLPQAMN[115]ITCTGR	SECIQCHPECLPQAMDITCTGR	2	1332.06
Human	P00533	1 - high confidence	YADAGHVCHLCHPN[115]CTYGCTGPGLEGCPTNGPK	YADAGHVCHLCHPDCTYGCTGPGLEGCPTNGPK	2	1829.76
Human	P00533	1 - high confidence	CDPSCPN[115]GSCWGAGEENCQK	CDPSCPDGSCWGAGEENCQK	2	1157.42
Human	P00533	1 - high confidence	AVVSLN[115]ITSLGLR	AVVSLDITSLGLR	2	672.401
Human	P00533	1 - high confidence	YADAGHVCHLCHPN[115]CTYGCTGPGLEGCPTN[115]GPK	YADAGHVCHLCHPDCTYGCTGPGLEGCPTDGPK	2	1830.25
Human	P00533	1 - high confidence	DIVSSDFLSN[115]MSMDFQNHLGSCQK	DIVSSDFLSDMSMDFQNHLGSCQK	2	1381.1
Human	P00533	1 - high confidence	SLSIN[115]ATNIK	SLSIDATNIK	2	531.299
Human	P00533	1 - high confidence	GNMYYENSYALAVLSNYDAN[115]KTGLKELPMR	GNMYYENSYALAVLSNYDADKTGLKELPMR	2	1713.82
Human	P00533	1 - high confidence	TCPAGVMGENN[115]TLVWK	TCPAGVMGENDTLVWK	2	889.419
Human	P00533	1 - high confidence	PAGVMGEN[115]NTLVWK	PAGVMGEDNTLVWK	2	758.88
Human	P00533	1 - high confidence	VVSLN[115]ITSLGLR	VVSLDITSLGLR	2	636.883
Human	P00533	1 - high confidence	EITGFLLIQAWPEN[115]R	EITGFLLIQAWPEDR	2	894.473
Human	P00533	1 - high confidence	GNMYYENSYALAVLSNYDAN[115]KTGLK	GNMYYENSYALAVLSNYDADKTGLK	2	1400.66
Human	P00533	1 - high confidence	DIVSSDFLSN[115]MSMDFQN[115]HLGSCQK	DIVSSDFLSDMSMDFQDHLGSCQK	2	1381.59
Human	P00533	1 - high confidence	TCPAGVMGEN[115]N[115]TLVWK	TCPAGVMGEDDTLVWK	2	889.911
Human	P00533	1 - high confidence	N[115]CTSISGDLHILPVAFR	DCTSISGDLHILPVAFR	2	950.986
Human	P00533	1 - high confidence	EFVEN[115]SECIQCHPECLPQAMN[115]ITCTGR	EFVEDSECIQCHPECLPQAMDITCTGR	2	1641.69
Human	P00533	1 - high confidence	EFVENSECIQCHPECLPQAMN[115]ITCTGR	EFVENSECIQCHPECLPQAMDITCTGR	2	1641.2
Human	P00533	1 - high confidence	TCPAGVMGEN[115]NTLVWK	TCPAGVMGEDNTLVWK	2	889.419
Human	P00533	1 - high confidence	DSLSIN[115]ATNIK	DSLSIDATNIK	2	588.812
Human	P00533	1 - high confidence	LLIQAWPEN[115]R	LLIQAWPEDR	2	620.841
Human	P00734	2 - putative	GHVN[115]ITR	GHVDITR	2	399.22
Human	P00738	2 - putative	NLFLN[115]HSEN[115]A	NLFLDHSEDA	2	580.768
Human	P00738	2 - putative	LN[115]HSEN[115]ATAK	LDHSEDATAK	2	543.76
Human	P00738	2 - putative	LFLN[115]HSEN[115]ATAK	LFLDHSEDATAK	2	673.836
Human	P00738	2 - putative	N[115]LFLN[115]HSEN[115]ATAK	DLFLDHSEDATAK	2	731.349
Human	P00738	2 - putative	FLN[115]HSEN[115]ATAK	FLDHSEDATAK	2	617.294
Human	P00738	2 - putative	VVLHPN[115]YSQVDIGLIK	VVLHPDYSQVDIGLIK	2	898.504
Human	P00738	2 - putative	NLFLN[115]HSEN[115]ATAK	NLFLDHSEDATAK	2	730.857
Human	P00749	2 - putative	EN[115]STDYLYPEQLK	EDSTDYLYPEQLK	2	800.876
Human	P00750	2 - putative	GTWSTAESGAECTNWN[115]SSALAQKPYSGR	GTWSTAESGAECTNWDSSALAQKPYSGR	2	1509.17
Human	P00750	2 - putative	CTSQHLLN[115]R	CTSQHLLDR	2	565.278
Human	P01009	2 - putative	YLGN[115]ATAIFFLPDEGK	YLGDATAIFFLPDEGK	2	878.946
Human	P01011	2 - putative	TLN[115]QSSDELQLSMGNAMFVK	TLDQSSDELQLSMGNAMFVK	2	1107.53
Human	P01023	2 - putative	GNEANYYSN[115]ATTDEHGLVQFSIN[115]TTNVMGTSLTVR	GNEANYYSDATTDEHGLVQFSIDTTNVMGTSLTVR	2	1903.88
Human	P01024	2 - putative	TVLTPATNHMGN[115]VTFTIPANR	TVLTPATNHMGDVTFTIPANR	2	1128.58
Human	P01024	2 - putative	TVLTPATN[115]HMGNVTFTIPANR	TVLTPATDHMGNVTFTIPANR	2	1128.58
Human	P01033	2 - putative	FVGTPEVN[115]QTTLYQR	FVGTPEVDQTTLYQR	2	877.444
Human	P01042	2 - putative	LNAEN[115]NATFYFK	LNAEDNATFYFK	2	716.844
Human	P01042	2 - putative	ITYSIVQTN[115]CSK	ITYSIVQTDCSK	2	707.851
Human	P01042	2 - putative	LNAENN[115]ATFYFK	LNAENDATFYFK	2	716.844
Human	P01130	1 - high confidence	LTGSDVNLLAENLLSPEDMVLFHN[115]LTQPR	LTGSDVNLLAENLLSPEDMVLFHDLTQPR	2	1619.33
Human	P01130	1 - high confidence	TTLSN[115]GGCQYLCLPAPQINPHSPK	TTLSDGGCQYLCLPAPQINPHSPK	2	1327.64
Human	P01130	1 - high confidence	DMSDEVGCVN[115]VTLCEGPNK	DMSDEVGCVDVTLCEGPNK	2	1062.95
Human	P01137	2 - putative	FFN[115]TSELR	FFDTSELR	2	507.751
Human	P01137	2 - putative	QSTHSIYMFFN[115]TSELR	QSTHSIYMFFDTSELR	2	981.46
Human	P01137	2 - putative	LASPPSQGEVPPGPLPEAVLALYN[115]STR	LASPPSQGEVPPGPLPEAVLALYDSTR	2	1381.23
Human	P01137	2 - putative	MFFN[115]TSELR	MFFDTSELR	2	573.271
Human	P01137	2 - putative	YSN[115]NSWR	YSDNSWR	2	464.204
Human	P01589	1 - high confidence	SGSLYMLCTGN[115]SSH	SGSLYMLCTGDSSH	2	757.819
Human	P01589	1 - high confidence	MLCTGN[115]SSHSSWDNQCQCTSSATR	MLCTGDSSHSSWDNQCQCTSSATR	2	1388.55
Human	P01589	1 - high confidence	SGSLYMLCTGN[115]SSHSSWDNQCQCTSSATR	SGSLYMLCTGDSSHSSWDNQCQCTSSATR	2	1642.16
Human	P01730	1 - high confidence	ALPQYAGSGN[115]LTLALEAK	ALPQYAGSGDLTLALEAK	2	909.489
Human	P01730	1 - high confidence	SGN[115]LTLALEAK	SGDLTLALEAK	2	559.312
Human	P01730	1 - high confidence	YAGSGN[115]LTLALEAK	YAGSGDLTLALEAK	2	704.873
Human	P01730	1 - high confidence	N[115]LTCEVWGPTSPK	DLTCEVWGPTSPK	2	745.356
Human	P01730	1 - high confidence	GSGN[115]LTLALEAK	GSGDLTLALEAK	2	587.822
Human	P01730	1 - high confidence	AGSGN[115]LTLALEAK	AGSGDLTLALEAK	2	623.341
Human	P01733	3 - unspecific	PN[115]ASFSTLK	PDASFSTLK	2	483.254
Human	P01733	3 - unspecific	MPN[115]ASFSTLK	MPDASFSTLK	2	548.774
Human	P01737	3 - unspecific	AVSDLEPN[115]SSASK	AVSDLEPDSSASK	2	653.315
Human	P01737	3 - unspecific	SDAAEYFCAVSDLEPN[115]SSASK	SDAAEYFCAVSDLEPDSSASK	2	1124.98
Human	P01737	3 - unspecific	MSDAAEYFCAVSDLEPN[115]SSASK	MSDAAEYFCAVSDLEPDSSASK	2	1190.5
Human	P01737	3 - unspecific	PSAHMSDAAEYFCAVSDLEPN[115]SSASK	PSAHMSDAAEYFCAVSDLEPDSSASK	2	1386.59
Human	P01848	1 - high confidence	DSQTN[115]VSQSK	DSQTDVSQSK	2	547.755
Human	P01848	1 - high confidence	ACANAFN[115]NSIIPEDTFFPSPESSCDVK	ACANAFDNSIIPEDTFFPSPESSCDVK	2	1509.66
Human	P01848	1 - high confidence	NAFN[115]NSIIPEDTFFPSPESSCDVK	NAFDNSIIPEDTFFPSPESSCDVK	2	1358.61
Human	P01848	1 - high confidence	NAFNN[115]SIIPEDTFFPSPESSCDVK	NAFNDSIIPEDTFFPSPESSCDVK	2	1358.61
Human	P01848	1 - high confidence	SDFACANAFN[115]NSIIPEDTFFPSPESSCDVK	SDFACANAFDNSIIPEDTFFPSPESSCDVK	2	1684.23
Human	P01848	1 - high confidence	AFN[115]N[115]SIIPEDTFFPSPESSCDVK	AFDDSIIPEDTFFPSPESSCDVK	2	1302.08
Human	P01848	1 - high confidence	SDFACANAFNN[115]SIIPEDTFFPSPESSCDVK	SDFACANAFNDSIIPEDTFFPSPESSCDVK	2	1684.23
Human	P01848	1 - high confidence	SN[115]SAVAWSN[115]K	SDSAVAWSDK	2	533.249
Human	P01848	1 - high confidence	FTDFDSQTN[115]VSQSK	FTDFDSQTDVSQSK	2	802.86
Human	P01848	1 - high confidence	AFN[115]NSIIPEDTFFPSPESSCDVK	AFDNSIIPEDTFFPSPESSCDVK	2	1301.59
Human	P01848	1 - high confidence	DFDSQTN[115]VSQSK	DFDSQTDVSQSK	2	678.802
Human	P01848	1 - high confidence	AFNN[115]SIIPEDTFFPSPESSCDVK	AFNDSIIPEDTFFPSPESSCDVK	2	1301.59
Human	P01848	1 - high confidence	FDSQTN[115]VSQSK	FDSQTDVSQSK	2	621.289
Human	P01848	1 - high confidence	SNSAVAWSN[115]K	SNSAVAWSDK	2	532.757
Human	P01848	1 - high confidence	LFTDFDSQTN[115]VSQSK	LFTDFDSQTDVSQSK	2	859.402
Human	P01848	1 - high confidence	SVCLFTDFDSQTN[115]VSQSK	SVCLFTDFDSQTDVSQSK	2	1032.47
Human	P01848	1 - high confidence	TDFDSQTN[115]VSQSK	TDFDSQTDVSQSK	2	729.326
Human	P01850	1 - high confidence	EVHSGVSTDPQPLKEQPALN[115]DSRY	EVHSGVSTDPQPLKEQPALDDSRY	2	1334.65
Human	P01850	1 - high confidence	EQPALN[115]DSRY	EQPALDDSRY	2	597.278
Human	P01850	1 - high confidence	HSGVSTDPQPLKEQPALN[115]DSR	HSGVSTDPQPLKEQPALDDSR	2	1139.06
Human	P01850	1 - high confidence	VSTDPQPLKEQPALN[115]DSR	VSTDPQPLKEQPALDDSR	2	998.506
Human	P01850	1 - high confidence	SGVSTDPQPLKEQPALN[115]DSR	SGVSTDPQPLKEQPALDDSR	2	1070.53
Human	P01850	1 - high confidence	PALN[115]DSR	PALDDSR	2	387.196
Human	P01850	1 - high confidence	KEQPALN[115]DSR	KEQPALDDSR	2	579.794
Human	P01850	1 - high confidence	PLKEQPALN[115]DSR	PLKEQPALDDSR	2	684.863
Human	P01850	1 - high confidence	PQPLKEQPALN[115]DSR	PQPLKEQPALDDSR	2	797.418
Human	P01850	1 - high confidence	EVHSGVSTDPQPLKEQPALN[115]DSR	EVHSGVSTDPQPLKEQPALDDSR	2	1253.12
Human	P01850	1 - high confidence	EQPALN[115]DSR	EQPALDDSR	2	515.747
Human	P01857	2 - putative	EEQYN[115]STYR	EEQYDSTYR	2	595.755
Human	P01859	2 - putative	EEQFN[115]STFR	EEQFDSTFR	2	579.76
Human	P01861	2 - putative	EEQFN[115]STYR	EEQFDSTYR	2	587.757
Human	P01871	1 - high confidence	KN[115]NSDISSTR	KDNSDISSTR	2	561.776
Human	P01871	1 - high confidence	YKN[115]N[115]SDISSTRGFPSVLR	YKDDSDISSTRGFPSVLR	2	1022.01
Human	P01871	1 - high confidence	THTN[115]ISESH	THTDISESH	2	513.731
Human	P01871	1 - high confidence	THTN[115]ISESHPN[115]A	THTDISESHPDA	2	655.289
Human	P01871	1 - high confidence	THTN[115]ISESHPN[115]ATFSA	THTDISESHPDATFSA	2	858.382
Human	P01871	1 - high confidence	THTN[115]ISESHPN[115]ATFSAVG	THTDISESHPDATFSAVG	2	936.427
Human	P01871	1 - high confidence	THTN[115]ISESHPN[115]ATFSAVGEA	THTDISESHPDATFSAVGEA	2	1036.47
Human	P01871	1 - high confidence	THTN[115]ISESHPNAT	THTDISESHPNAT	2	705.321
Human	P01871	1 - high confidence	YKN[115]NSDISSTRGFPSVLRGGK	YKDNSDISSTRGFPSVLRGGK	2	1142.59
Human	P01871	1 - high confidence	YAATSQVLLPSKDVMQGTDEHVVCKVQHPN[115]GNKEK	YAATSQVLLPSKDVMQGTDEHVVCKVQHPDGNKEK	2	1954.97
Human	P01871	1 - high confidence	YKNN[115]SDISSTRGFPSVLRGGK	YKNDSDISSTRGFPSVLRGGK	2	1142.59
Human	P01871	1 - high confidence	YKN[115]NSDISSTRGFPSVLR	YKDNSDISSTRGFPSVLR	2	1021.52
Human	P01871	1 - high confidence	VQHPNGN[115]KEKNVPLPVIAELPPK	VQHPNGDKEKNVPLPVIAELPPK	2	1260.21
Human	P01871	1 - high confidence	NN[115]SDISSTR	NDSDISSTR	2	497.728
Human	P01871	1 - high confidence	YKNN[115]SDISSTRGFPSVLR	YKNDSDISSTRGFPSVLR	2	1021.52
Human	P01871	1 - high confidence	THTN[115]ISESHPN	THTDISESHPN	2	619.279
Human	P01871	1 - high confidence	THTN[115]ISESHPN[115]	THTDISESHPD	2	619.771
Human	P01871	1 - high confidence	N[115]NSDISSTR	DNSDISSTR	2	497.728
Human	P01871	1 - high confidence	THTN[115]ISESHPN[115]ATFSAVGEASICEDDWN	THTDISESHPDATFSAVGEASICEDDWN	2	1546.15
Human	P01871	1 - high confidence	THTN[115]ISESHPN[115]ATF	THTDISESHPDATF	2	779.347
Human	P01871	1 - high confidence	THTN[115]ISESHPN[115]ATFSAVGEAS	THTDISESHPDATFSAVGEAS	2	1079.98
Human	P01871	1 - high confidence	GLTFQQN[115]ASSM	GLTFQQDASSM	2	592.769
Human	P01871	1 - high confidence	THTN[115]ISESHPN[115]ATFS	THTDISESHPDATFS	2	822.863
Human	P01871	1 - high confidence	VDHRGLTFQQN[115]ASSMCVPDQDTAIR	VDHRGLTFQQDASSMCVPDQDTAIR	2	1424.16
Human	P01871	1 - high confidence	THTN[115]ISESHPN[115]AT	THTDISESHPDAT	2	705.813
Human	P01871	1 - high confidence	THTN[115]ISESHPN[115]ATFSAVGEASICEDDWNSGER	THTDISESHPDATFSAVGEASICEDDWNSGER	2	1760.75
Human	P01871	1 - high confidence	YKN[115]N[115]SDISSTR	YKDDSDISSTR	2	643.8
Human	P01871	1 - high confidence	YKNN[115]SDISSTR	YKNDSDISSTR	2	643.308
Human	P01871	1 - high confidence	YKN[115]NSDISSTR	YKDNSDISSTR	2	643.308
Human	P01871	1 - high confidence	GLTFQQN[115]ASSMCVPDQDTAIR	GLTFQQDASSMCVPDQDTAIR	2	1170.54
Human	P01876	3 - unspecific	LAGKPTHVN[115]VSVVMAEVDGTC	LAGKPTHVDVSVVMAEVDGTC	2	1093.04
Human	P01889	1 - high confidence	GYYN[115]QSEAGSHTLQS	GYYDQSEAGSHTLQS	2	821.856
Human	P01889	1 - high confidence	GYYN[115]QSEAGSHTLQSMY	GYYDQSEAGSHTLQSMY	2	968.908
Human	P01889	1 - high confidence	GYYN[115]QSEAGSHTLQSMYGCDV	GYYDQSEAGSHTLQSMYGCDV	2	1184.48
Human	P01889	1 - high confidence	GYYN[115]QSEAGSHTLQSM	GYYDQSEAGSHTLQSM	2	887.376
Human	P01889	1 - high confidence	GYYN[115]QSEAGSHTLQSMYG	GYYDQSEAGSHTLQSMYG	2	997.418
Human	P01889	1 - high confidence	GYYN[115]QSEAGSHT	GYYDQSEAGSHT	2	657.768
Human	P01889	1 - high confidence	GYYN[115]QSEAGSHTLQSMYGCDVGPDGR	GYYDQSEAGSHTLQSMYGCDVGPDGR	2	1425.59
Human	P01889	1 - high confidence	GYYN[115]QSEAGSH	GYYDQSEAGSH	2	607.244
Human	P01891	1 - high confidence	GYYN[115]QSEAGSHTIQMMY	GYYDQSEAGSHTIQMMY	2	990.912
Human	P01891	1 - high confidence	YYN[115]QSEAGSHTIQMMYGCDVGSDGR	YYDQSEAGSHTIQMMYGCDVGSDGR	2	1414.08
Human	P01891	1 - high confidence	GYYN[115]QSEAGSHTIQMM	GYYDQSEAGSHTIQMM	2	909.38
Human	P01891	1 - high confidence	GYYN[115]QSEAGSHTIQM	GYYDQSEAGSHTIQM	2	843.86
Human	P01891	1 - high confidence	RYLEN[115]GKETLQR	RYLEDGKETLQR	2	754.4
Human	P01891	1 - high confidence	GYYN[115]QSEAGSHTIQMMYGCDVGSDGR	GYYDQSEAGSHTIQMMYGCDVGSDGR	2	1442.59
Human	P01891	1 - high confidence	YLEN[115]GKETLQR	YLEDGKETLQR	2	676.349
Human	P01891	1 - high confidence	GYYN[115]QSEAGSHT	GYYDQSEAGSHT	2	657.768
Human	P01891	1 - high confidence	GYYN[115]QSEAGSHTIQ	GYYDQSEAGSHTIQ	2	778.34
Human	P01891	1 - high confidence	GYYN[115]QSEAGSHTI	GYYDQSEAGSHTI	2	714.31
Human	P01891	1 - high confidence	GYYN[115]QSEAGSH	GYYDQSEAGSH	2	607.244
Human	P01892	1 - high confidence	VKAHSQTHRVDLGTLRGYYN[115]QSEAGSHTVQR	VKAHSQTHRVDLGTLRGYYDQSEAGSHTVQR	2	1748.88
Human	P01892	1 - high confidence	GYYN[115]QSEAGSHTV	GYYDQSEAGSHTV	2	707.303
Human	P01892	1 - high confidence	RYLEN[115]GKETLQR	RYLEDGKETLQR	2	754.4
Human	P01892	1 - high confidence	AHSQTHRVDLGTLRGYYN[115]QSEAGSHTVQR	AHSQTHRVDLGTLRGYYDQSEAGSHTVQR	2	1635.3
Human	P01892	1 - high confidence	RGYYN[115]QSEAGSHTVQR	RGYYDQSEAGSHTVQR	2	927.433
Human	P01892	1 - high confidence	GYYN[115]QSEAGSHTVQ	GYYDQSEAGSHTVQ	2	771.332
Human	P01892	1 - high confidence	YLEN[115]GKETLQR	YLEDGKETLQR	2	676.349
Human	P01892	1 - high confidence	GYYN[115]QSEAGSHT	GYYDQSEAGSHT	2	657.768
Human	P01892	1 - high confidence	VDLGTLRGYYN[115]QSEAGSHTVQR	VDLGTLRGYYDQSEAGSHTVQR	2	1226.6
Human	P01892	1 - high confidence	N[115]QSEAGSHTVQR	DQSEAGSHTVQR	2	657.808
Human	P01892	1 - high confidence	YYN[115]QSEAGSHTVQR	YYDQSEAGSHTVQR	2	820.872
Human	P01892	1 - high confidence	GYYN[115]QSEAGSH	GYYDQSEAGSH	2	607.244
Human	P01892	1 - high confidence	YN[115]QSEAGSHTVQR	YDQSEAGSHTVQR	2	739.34
Human	P01892	1 - high confidence	GYYN[115]QSEAGSHTVQR	GYYDQSEAGSHTVQR	2	849.382
Human	P01903	1 - high confidence	FTPPVVN[115]VTWL	FTPPVVDVTWL	2	637.348
Human	P01903	1 - high confidence	VN[115]VTWLR	VDVTWLR	2	444.754
Human	P01903	1 - high confidence	RSN[115]YTPITNVPPEVT	RSDYTPITNVPPEVT	2	844.931
Human	P01903	1 - high confidence	RSN[115]YTPITN	RSDYTPITN	2	533.765
Human	P01903	1 - high confidence	RSNYTPITNVPPEVTVLTN[115]SPVELR	RSNYTPITNVPPEVTVLTDSPVELR	2	1399.24
Human	P01903	1 - high confidence	RSN[115]YTPITNVPPEVTVLT	RSDYTPITNVPPEVTVLT	2	1001.53
Human	P01903	1 - high confidence	RSNYTPITN[115]VPPEVTVLTN[115]SPVELR	RSNYTPITDVPPEVTVLTDSPVELR	2	1399.74
Human	P01903	1 - high confidence	SNYTPITN[115]VPPEVTVLTNSPVELR	SNYTPITDVPPEVTVLTNSPVELR	2	1321.19
Human	P01903	1 - high confidence	VVN[115]VTWLR	VVDVTWLR	2	494.288
Human	P01903	1 - high confidence	SN[115]YTPITNVPPEVTVLTN	SDYTPITNVPPEVTVLTN	2	980.502
Human	P01903	1 - high confidence	RSN[115]YTPITN[115]VPPEVTVLTN[115]	RSDYTPITDVPPEVTVLTD	2	1059.54
Human	P01903	1 - high confidence	PVVN[115]VTWLR	PVVDVTWLR	2	542.814
Human	P01903	1 - high confidence	SN[115]YTPITNVPPEVTVLTN[115]SPVELR	SDYTPITNVPPEVTVLTDSPVELR	2	1321.68
Human	P01903	1 - high confidence	N[115]GKPVTTGVSETVFLPREDHLFRK	DGKPVTTGVSETVFLPREDHLFRK	2	1364.73
Human	P01903	1 - high confidence	RSNYTPITN[115]VPPEVTVLTNSPVELR	RSNYTPITDVPPEVTVLTNSPVELR	2	1399.24
Human	P01903	1 - high confidence	N[115]GKPVTTGVSETVFLPR	DGKPVTTGVSETVFLPR	2	901.989
Human	P01903	1 - high confidence	RSN[115]YTPITNVPPEVTVLTN[115]SPVELR	RSDYTPITNVPPEVTVLTDSPVELR	2	1399.74
Human	P01903	1 - high confidence	SN[115]YTPITNVPPEVTVL	SDYTPITNVPPEVTVL	2	872.957
Human	P01903	1 - high confidence	RSN[115]YTPITNVPPEVTVLTN	RSDYTPITNVPPEVTVLTN	2	1058.55
Human	P01903	1 - high confidence	TPPVVN[115]VTWLR	TPPVVDVTWLR	2	641.864
Human	P01903	1 - high confidence	N[115]GKPVTTGVSETVFLPREDHLFR	DGKPVTTGVSETVFLPREDHLFR	2	1300.68
Human	P01903	1 - high confidence	RSN[115]YTPITNVPPEVTVL	RSDYTPITNVPPEVTVL	2	951.007
Human	P01903	1 - high confidence	PPVVN[115]VTWLR	PPVVDVTWLR	2	591.341
Human	P01903	1 - high confidence	FTPPVVN[115]VTWLR	FTPPVVDVTWLR	2	715.399
Human	P01903	1 - high confidence	RSN[115]YTPITNVPPEVTVLTNSPVELR	RSDYTPITNVPPEVTVLTNSPVELR	2	1399.24
Human	P01903	1 - high confidence	SN[115]YTPITNVPPEVTVLTNSPVELR	SDYTPITNVPPEVTVLTNSPVELR	2	1321.19
Human	P01906	1 - high confidence	SN[115]STAATN[115]EVPEVTVFSK	SDSTAATDEVPEVTVFSK	2	941.952
Human	P01906	1 - high confidence	SN[115]STAATNEVPEVTVFSK	SDSTAATNEVPEVTVFSK	2	941.46
Human	P01908	1 - high confidence	RSN[115]STAATN[115]EVPEVTVFSK	RSDSTAATDEVPEVTVFSK	2	1020
Human	P01908	1 - high confidence	RSNSTAATN[115]EVPEVTVF	RSNSTAATDEVPEVTVF	2	911.948
Human	P01908	1 - high confidence	SN[115]STAATN[115]EVPEVTVF	SDSTAATDEVPEVTVF	2	834.389
Human	P01908	1 - high confidence	RSN[115]STAATN[115]EVPEVTVF	RSDSTAATDEVPEVTVF	2	912.44
Human	P01908	1 - high confidence	SN[115]STAATN[115]EVPEVTVFSK	SDSTAATDEVPEVTVFSK	2	941.952
Human	P01908	1 - high confidence	SN[115]STAATNEVPEVTVF	SDSTAATNEVPEVTVF	2	833.897
Human	P01908	1 - high confidence	RSN[115]STAATNEVPEVTVF	RSDSTAATNEVPEVTVF	2	911.948
Human	P01908	1 - high confidence	RSN[115]STAATNEVPEVTVFSK	RSDSTAATNEVPEVTVFSK	2	1019.51
Human	P01908	1 - high confidence	SN[115]STAATNEVPEVTVFSK	SDSTAATNEVPEVTVFSK	2	941.46
Human	P01909	1 - high confidence	RSNSTAATN[115]EVPEVTVF	RSNSTAATDEVPEVTVF	2	911.948
Human	P01909	1 - high confidence	RSN[115]STAATN[115]EVPEVTVFSK	RSDSTAATDEVPEVTVFSK	2	1020
Human	P01909	1 - high confidence	SN[115]STAATN[115]EVPEVTVF	SDSTAATDEVPEVTVF	2	834.389
Human	P01909	1 - high confidence	RSN[115]STAATN[115]EVPEVTVF	RSDSTAATDEVPEVTVF	2	912.44
Human	P01909	1 - high confidence	SN[115]STAATN[115]EVPEVTVFSK	SDSTAATDEVPEVTVFSK	2	941.952
Human	P01909	1 - high confidence	SN[115]STAATNEVPEVTVF	SDSTAATNEVPEVTVF	2	833.897
Human	P01909	1 - high confidence	SN[115]STAATNEVPEVTVFSK	SDSTAATNEVPEVTVFSK	2	941.46
Human	P01909	1 - high confidence	RSN[115]STAATNEVPEVTVFSK	RSDSTAATNEVPEVTVFSK	2	1019.51
Human	P01909	1 - high confidence	RSN[115]STAATNEVPEVTVF	RSDSTAATNEVPEVTVF	2	911.948
Human	P01911	1 - high confidence	FLWQPKRECHFFN[115]GTER	FLWQPKRECHFFDGTER	2	1127.04
Human	P01911	1 - high confidence	FFN[115]GTER	FFDGTER	2	436.204
Human	P01911	1 - high confidence	WFLN[115]GQEEK	WFLDGQEEK	2	576.275
Human	P01911	1 - high confidence	CHFFN[115]GTER	CHFFDGTER	2	584.749
Human	P01911	1 - high confidence	RECHFFN[115]GTERVR	RECHFFDGTERVR	2	854.905
Human	P01911	1 - high confidence	RECHFFN[115]GTER	RECHFFDGTER	2	727.321
Human	P01911	1 - high confidence	HFFN[115]GTER	HFFDGTER	2	504.733
Human	P01911	1 - high confidence	ECHFFN[115]GTER	ECHFFDGTER	2	649.27
Human	P01912	1 - high confidence	FFN[115]GTER	FFDGTER	2	436.204
Human	P01912	1 - high confidence	WFRN[115]GQEEK	WFRDGQEEK	2	597.784
Human	P01912	1 - high confidence	CHFFN[115]GTER	CHFFDGTER	2	584.749
Human	P01912	1 - high confidence	SECHFFN[115]GTERVR	SECHFFDGTERVR	2	820.371
Human	P01912	1 - high confidence	EYSTSECHFFN[115]GTER	EYSTSECHFFDGTER	2	932.879
Human	P01912	1 - high confidence	YSTSECHFFN[115]GTER	YSTSECHFFDGTER	2	868.357
Human	P01912	1 - high confidence	TSECHFFN[115]GTER	TSECHFFDGTER	2	743.31
Human	P01912	1 - high confidence	HFFN[115]GTER	HFFDGTER	2	504.733
Human	P01912	1 - high confidence	FLEYSTSECHFFN[115]GTERVR	FLEYSTSECHFFDGTERVR	2	1190.54
Human	P01912	1 - high confidence	STSECHFFN[115]GTER	STSECHFFDGTER	2	786.826
Human	P01912	1 - high confidence	ECHFFN[115]GTER	ECHFFDGTER	2	649.27
Human	P01912	1 - high confidence	FLEYSTSECHFFN[115]GTER	FLEYSTSECHFFDGTER	2	1062.96
Human	P01912	1 - high confidence	SECHFFN[115]GTER	SECHFFDGTER	2	692.786
Human	P01914	1 - high confidence	FFN[115]GTER	FFDGTER	2	436.204
Human	P01914	1 - high confidence	FECHFFN[115]GTERVR	FECHFFDGTERVR	2	850.389
Human	P01914	1 - high confidence	WFRN[115]GQEEK	WFRDGQEEK	2	597.784
Human	P01914	1 - high confidence	CHFFN[115]GTER	CHFFDGTER	2	584.749
Human	P01914	1 - high confidence	AAVDTYCRHN[115]YGVGESFTVQR	AAVDTYCRHDYGVGESFTVQR	2	1216.06
Human	P01914	1 - high confidence	TQPLQHHNLLVCSVN[115]GFYPGSIEVR	TQPLQHHNLLVCSVDGFYPGSIEVR	2	1433.72
Human	P01914	1 - high confidence	HFFN[115]GTER	HFFDGTER	2	504.733
Human	P01914	1 - high confidence	FECHFFN[115]GTER	FECHFFDGTER	2	722.804
Human	P01914	1 - high confidence	ECHFFN[115]GTER	ECHFFDGTER	2	649.27
Human	P01920	1 - high confidence	YFTN[115]GTER	YFTDGTER	2	494.725
Human	P01920	1 - high confidence	CYFTN[115]GTER	CYFTDGTER	2	574.741
Human	P01920	1 - high confidence	TEALNHHN[115]LLVCSVTDFYPAQIK	TEALNHHDLLVCSVTDFYPAQIK	2	1336.17
Human	P01920	1 - high confidence	AMCYFTN[115]GTERVR	AMCYFTDGTERVR	2	803.364
Human	P01920	1 - high confidence	AMCYFTN[115]GTER	AMCYFTDGTER	2	675.779
Human	P02452	2 - putative	ASQN[115]ITYHCK	ASQDITYHCK	2	611.783
Human	P02452	2 - putative	LMSTEASQN[115]ITYHCK	LMSTEASQDITYHCK	2	892.406
Human	P02452	2 - putative	LMSTEASQN[115]ITYH	LMSTEASQDITYH	2	748.343
Human	P02458	2 - putative	LLSTEGSQN[115]ITYHCK	LLSTEGSQDITYHCK	2	876.42
Human	P02458	2 - putative	LLSTEGSQN[115]ITYH	LLSTEGSQDITYH	2	732.357
Human	P02461	2 - putative	N[115]GETGPQGPPGPTGPGGD	DGETGPQGPPGPTGPGGD	2	796.848
Human	P02461	2 - putative	ASQN[115]ITYH	ASQDITYH	2	467.72
Human	P02461	2 - putative	ASQN[115]ITYHCK	ASQDITYHCK	2	611.783
Human	P02545	3 - unspecific	TALIN[115]STGEEVAMR	TALIDSTGEEVAMR	2	746.872
Human	P02671	2 - putative	MDGSLNFN[115]R	MDGSLNFDR	2	527.738
Human	P02675	2 - putative	GTAGNALMDGASQLMGEN[115]R	GTAGNALMDGASQLMGEDR	2	947.428
Human	P02675	2 - putative	QGVN[115]DNEEGFFSAR	QGVDDNEEGFFSAR	2	785.845
Human	P02749	2 - putative	LGN[115]WSAMPSCK	LGDWSAMPSCK	2	626.281
Human	P02749	2 - putative	VYKPSAGN[115]NSLYR	VYKPSAGDNSLYR	2	735.376
Human	P02751	2 - putative	GGNSN[115]GALCHFPFLYN[115]NHN[115]YTDCTSEGR	GGNSDGALCHFPFLYDNHDYTDCTSEGR	2	1603.16
Human	P02751	2 - putative	GGNSN[115]GALCHFPFLYNNHN[115]YTDCTSEGR	GGNSDGALCHFPFLYNNHDYTDCTSEGR	2	1602.67
Human	P02751	2 - putative	GGNSNGALCHFPFLYNNHN[115]YTDCTSEGR	GGNSNGALCHFPFLYNNHDYTDCTSEGR	2	1602.17
Human	P02751	2 - putative	EDVDYHLYPHGPGLNPN[115]ASTGQE	EDVDYHLYPHGPGLNPDASTGQE	2	1256.06
Human	P02751	2 - putative	TYNVN[115]DTFHK	TYNVDDTFHK	2	620.289
Human	P02751	2 - putative	ESKPLTAQQTTKLDAPTN[115]LQFVN[115]ETDSTVLVR	ESKPLTAQQTTKLDAPTDLQFVDETDSTVLVR	2	1773.92
Human	P02751	2 - putative	NN[115]HNYTDCTSEGR	NDHNYTDCTSEGR	2	784.808
Human	P02751	2 - putative	DQCIVDDITYNVN[115]DTFHKR	DQCIVDDITYNVDDTFHKR	2	1177.54
Human	P02751	2 - putative	MLN[115]CTCFGQGR	MLDCTCFGQGR	2	672.781
Human	P02751	2 - putative	LYN[115]N[115]HN[115]YTDCTSEGR	LYDDHDYTDCTSEGR	2	923.866
Human	P02751	2 - putative	LYNN[115]HNYTDCTSEGR	LYNDHNYTDCTSEGR	2	922.882
Human	P02751	2 - putative	FVN[115]ETDSTVLVR	FVDETDSTVLVR	2	690.857
Human	P02751	2 - putative	LYN[115]NHNYTDCTSEGR	LYDNHNYTDCTSEGR	2	922.882
Human	P02751	2 - putative	NHN[115]YTDCTSEGR	NHDYTDCTSEGR	2	727.787
Human	P02751	2 - putative	NNHN[115]YTDCTSEGR	NNHDYTDCTSEGR	2	784.808
Human	P02751	2 - putative	LN[115]CTCFGQGR	LDCTCFGQGR	2	607.261
Human	P02751	2 - putative	DITYNVN[115]DTFHK	DITYNVDDTFHK	2	734.344
Human	P02751	2 - putative	DQCIVDDITYN[115]VNDTFHK	DQCIVDDITYDVNDTFHK	2	1099.49
Human	P02751	2 - putative	HN[115]YTDCTSEGR	HDYTDCTSEGR	2	670.765
Human	P02751	2 - putative	LYN[115]NHN[115]YTDCTSEGR	LYDNHDYTDCTSEGR	2	923.374
Human	P02751	2 - putative	DQCIVDDITYN[115]VN[115]DTFHK	DQCIVDDITYDVDDTFHK	2	1099.98
Human	P02751	2 - putative	LDAPTN[115]LQFVN[115]ETDSTVLVR	LDAPTDLQFVDETDSTVLVR	2	1117.57
Human	P02751	2 - putative	ESKPLTAQQTTKLDAPTNLQFVN[115]ETDSTVLVR	ESKPLTAQQTTKLDAPTNLQFVDETDSTVLVR	2	1773.42
Human	P02751	2 - putative	LYN[115]N[115]HNYTDCTSEGR	LYDDHNYTDCTSEGR	2	923.374
Human	P02751	2 - putative	LYNN[115]HN[115]YTDCTSEGR	LYNDHDYTDCTSEGR	2	923.374
Human	P02751	2 - putative	RHEEGHMLN[115]CTCFGQGR	RHEEGHMLDCTCFGQGR	2	1045.44
Human	P02751	2 - putative	LYNNHN[115]YTDCTSEGR	LYNNHDYTDCTSEGR	2	922.882
Human	P02751	2 - putative	HEEGHMLN[115]CTCFGQGR	HEEGHMLDCTCFGQGR	2	967.394
Human	P02751	2 - putative	DQCIVDDITYNVN[115]DTFHK	DQCIVDDITYNVDDTFHK	2	1099.49
Human	P02751	2 - putative	LDAPTNLQFVN[115]ETDSTVLVR	LDAPTNLQFVDETDSTVLVR	2	1117.07
Human	P02760	2 - putative	WN[115]ITMESYVVH	WDITMESYVVH	2	690.322
Human	P02763	2 - putative	LVPVPITN[115]ATLDQITGK	LVPVPITDATLDQITGK	2	891.009
Human	P02765	2 - putative	AALAAFNAQNN[115]GSNFQLEEISR	AALAAFNAQNDGSNFQLEEISR	2	1183.58
Human	P02765	2 - putative	VCQDCPLLAPLN[115]DTR	VCQDCPLLAPLDDTR	2	886.922
Human	P02786	1 - high confidence	LLNEN[115]SYVPR	LLNEDSYVPR	2	603.315
Human	P02786	1 - high confidence	N[115]GSIVIVR	DGSIVIVR	2	429.759
Human	P02786	1 - high confidence	FN[115]ETLFR	FDETLFR	2	464.235
Human	P02786	1 - high confidence	KDFEDLYTPVN[115]GSIV	KDFEDLYTPVDGSIV	2	849.42
Human	P02786	1 - high confidence	KQN[115]N[115]GAFNETLFR	KQDDGAFNETLFR	2	770.876
Human	P02786	1 - high confidence	LYTPVN[115]GSIVIVR	LYTPVDGSIVIVR	2	716.417
Human	P02786	1 - high confidence	DSAQNSVIIVDKN[115]GR	DSAQNSVIIVDKDGR	2	808.919
Human	P02786	1 - high confidence	LLN[115]ENSYVPR	LLDENSYVPR	2	603.315
Human	P02786	1 - high confidence	KDFEDLYTPVN[115]GSIVIV	KDFEDLYTPVDGSIVIV	2	955.496
Human	P02786	1 - high confidence	LAVDEEENADN[115]NTK	LAVDEEENADDNTK	2	781.847
Human	P02786	1 - high confidence	LVHAN[115]FGTKKDFEDLYTPVNGSIVIVR	LVHADFGTKKDFEDLYTPVNGSIVIVR	2	1517.31
Human	P02786	1 - high confidence	QN[115]N[115]GAFN[115]ETLFR	QDDGAFDETLFR	2	707.321
Human	P02786	1 - high confidence	YN[115]SQLLSFVR	YDSQLLSFVR	2	614.325
Human	P02786	1 - high confidence	NGAFN[115]ETLFR	NGAFDETLFR	2	585.286
Human	P02786	1 - high confidence	KQN[115]N[115]GAFN[115]ETLFR	KQDDGAFDETLFR	2	771.368
Human	P02786	1 - high confidence	KQNN[115]GAFN[115]ETLF	KQNDGAFDETLF	2	692.826
Human	P02786	1 - high confidence	N[115]GAFN[115]ETLFR	DGAFDETLFR	2	585.778
Human	P02786	1 - high confidence	KQNNGAFN[115]ETLF	KQNNGAFDETLF	2	692.334
Human	P02786	1 - high confidence	FEDLYTPVN[115]GSIVIVR	FEDLYTPVDGSIVIVR	2	911.986
Human	P02786	1 - high confidence	GAFN[115]ETLFR	GAFDETLFR	2	528.264
Human	P02786	1 - high confidence	TPVN[115]GSIVIVR	TPVDGSIVIVR	2	578.343
Human	P02786	1 - high confidence	LGTGDPYTPGFPSFN[115]HTQFPPSR	LGTGDPYTPGFPSFDHTQFPPSR	2	1261.1
Human	P02786	1 - high confidence	YTPVN[115]GSIVIVR	YTPVDGSIVIVR	2	659.875
Human	P02786	1 - high confidence	KQN[115]NGAFN[115]ETLFR	KQDNGAFDETLFR	2	770.876
Human	P02786	1 - high confidence	AHLGTGDPYTPGFPSFN[115]HTQFPPSR	AHLGTGDPYTPGFPSFDHTQFPPSR	2	1365.14
Human	P02786	1 - high confidence	PVN[115]GSIVIVR	PVDGSIVIVR	2	527.819
Human	P02786	1 - high confidence	LVHANFGTKKDFEDLYTPVN[115]GSIVIVR	LVHANFGTKKDFEDLYTPVDGSIVIVR	2	1517.31
Human	P02786	1 - high confidence	KQNN[115]GAFN[115]ETLFR	KQNDGAFDETLFR	2	770.876
Human	P02786	1 - high confidence	KQNNGAFN[115]ETLFR	KQNNGAFDETLFR	2	770.384
Human	P02786	1 - high confidence	QNN[115]GAFN[115]ETLFR	QNDGAFDETLFR	2	706.829
Human	P02786	1 - high confidence	QNNGAFN[115]ETLFR	QNNGAFDETLFR	2	706.337
Human	P02786	1 - high confidence	KDFEDLYTPVN[115]GSIVIVR	KDFEDLYTPVDGSIVIVR	2	1033.55
Human	P02786	1 - high confidence	DFEDLYTPVN[115]GSIVIVR	DFEDLYTPVDGSIVIVR	2	969.499
Human	P02787	2 - putative	QQQHLFGSN[115]VTDCSGNFCLFR	QQQHLFGSDVTDCSGNFCLFR	2	1258.56
Human	P02788	2 - putative	GLLFN[115]QTGSCK	GLLFDQTGSCK	2	613.301
Human	P02790	2 - putative	SFDATTLDDN[115]GTMLFFK	SFDATTLDDDGTMLFFK	2	962.441
Human	P02790	2 - putative	PAVGN[115]CSSALR	PAVGDCSSALR	2	566.777
Human	P02790	2 - putative	ALPQPQN[115]VTSLLGCTH	ALPQPQDVTSLLGCTH	2	868.938
Human	P02790	2 - putative	SWPAVGN[115]CSSALR	SWPAVGDCSSALR	2	703.333
Human	P03989	1 - high confidence	RYYN[115]QSEAGSHTLQNMYGCDVGPDGR	RYYDQSEAGSHTLQNMYGCDVGPDGR	2	1488.64
Human	P03989	1 - high confidence	YYN[115]QSEAGSHTLQN[115]M	YYDQSEAGSHTLQDM	2	872.863
Human	P03989	1 - high confidence	RYLEN[115]GKETLQR	RYLEDGKETLQR	2	754.4
Human	P03989	1 - high confidence	YYN[115]QSEAGSHTLQN	YYDQSEAGSHTLQN	2	806.85
Human	P03989	1 - high confidence	YYN[115]QSEAGSHTLQNMYGCDVGPDGR	YYDQSEAGSHTLQNMYGCDVGPDGR	2	1410.59
Human	P03989	1 - high confidence	YYN[115]QSEAGSHT	YYDQSEAGSHT	2	629.258
Human	P03989	1 - high confidence	YYN[115]QSEAGSHTL	YYDQSEAGSHTL	2	685.8
Human	P03989	1 - high confidence	YLEN[115]GKETLQR	YLEDGKETLQR	2	676.349
Human	P03989	1 - high confidence	YYN[115]QSEAGSHTLQ	YYDQSEAGSHTLQ	2	749.829
Human	P03989	1 - high confidence	YYN[115]QSEAGSHTLQNM	YYDQSEAGSHTLQNM	2	872.371
Human	P03989	1 - high confidence	YYN[115]QSEAGSH	YYDQSEAGSH	2	578.734
Human	P04003	2 - putative	LSVDKDQYVEPEN[115]VTIQ	LSVDKDQYVEPEDVTIQ	2	989.489
Human	P04004	2 - putative	N[115]GSLFAFR	DGSLFAFR	2	456.735
Human	P04062	2 - putative	N[115]STHHNVR	DSTHHNVR	2	483.234
Human	P04062	2 - putative	DLGPTLAN[115]STHHN	DLGPTLADSTHHN	2	689.326
Human	P04062	2 - putative	DLGPTLANSTHHN[115]VR	DLGPTLANSTHHDVR	2	816.911
Human	P04062	2 - putative	AN[115]STHHNVR	ADSTHHNVR	2	518.753
Human	P04062	2 - putative	TLAN[115]STHHNVR	TLADSTHHNVR	2	625.818
Human	P04062	2 - putative	DLGPTLAN[115]STHH	DLGPTLADSTHH	2	632.305
Human	P04062	2 - putative	LAN[115]STHHNVR	LADSTHHNVR	2	575.295
Human	P04062	2 - putative	PTLAN[115]STHHNVR	PTLADSTHHNVR	2	674.345
Human	P04062	2 - putative	TYTYADTPDDFQLHN[115]F	TYTYADTPDDFQLHDF	2	974.918
Human	P04062	2 - putative	GPTLAN[115]STHHNVR	GPTLADSTHHNVR	2	702.856
Human	P04062	2 - putative	MELSMGPIQAN[115]HTGTGLLLTLQPEQK	MELSMGPIQADHTGTGLLLTLQPEQK	2	1404.72
Human	P04062	2 - putative	DLGPTLAN[115]STHHNVR	DLGPTLADSTHHNVR	2	816.911
Human	P04062	2 - putative	TYTYADTPDDFQLHN[115]FSLPEEDTK	TYTYADTPDDFQLHDFSLPEEDTK	2	1424.63
Human	P04114	2 - putative	YDFN[115]SSMLYSTAK	YDFDSSMLYSTAK	2	764.34
Human	P04114	2 - putative	FN[115]SSYLQGTNQITGR	FDSSYLQGTNQITGR	2	843.911
Human	P04114	2 - putative	FVEGSHN[115]STVSLTTK	FVEGSHDSTVSLTTK	2	804.402
Human	P04156	1 - high confidence	TKGEN[115]FTETDVK	TKGEDFTETDVK	2	685.331
Human	P04156	1 - high confidence	N[115]FTETDVK	DFTETDVK	2	477.727
Human	P04156	1 - high confidence	YPNQVYYRPMDEYSNQNNFVHDCVN[115]ITIK	YPNQVYYRPMDEYSNQNNFVHDCVDITIK	2	1811.82
Human	P04156	1 - high confidence	PMDEYSNQNNFVHDCVN[115]ITIK	PMDEYSNQNNFVHDCVDITIK	2	1270.07
Human	P04156	1 - high confidence	QHTVTTTTKGEN[115]FTETDVK	QHTVTTTTKGEDFTETDVK	2	1069.52
Human	P04156	1 - high confidence	GEN[115]FTETDVK	GEDFTETDVK	2	570.759
Human	P04216	1 - high confidence	TNFTSKYN[115]MK	TNFTSKYDMK	2	617.795
Human	P04216	1 - high confidence	HEN[115]TSSSPIQ	HEDTSSSPIQ	2	550.749
Human	P04216	1 - high confidence	TYTCALHHSGHSPPISSQN[115]VTVLR	TYTCALHHSGHSPPISSQDVTVLR	2	1332.16
Human	P04216	1 - high confidence	HSPPISSQN[115]VTVLR	HSPPISSQDVTVLR	2	768.415
Human	P04216	1 - high confidence	SQN[115]VTVLR	SQDVTVLR	2	459.259
Human	P04216	1 - high confidence	GTYTCALHHSGHSPPISSQN[115]VTVLR	GTYTCALHHSGHSPPISSQDVTVLR	2	1360.67
Human	P04216	1 - high confidence	ISSQN[115]VTVLR	ISSQDVTVLR	2	559.317
Human	P04216	1 - high confidence	PISSQN[115]VTVLR	PISSQDVTVLR	2	607.844
Human	P04216	1 - high confidence	HEN[115]TSSSPIQYEFSL	HEDTSSSPIQYEFSL	2	870.395
Human	P04216	1 - high confidence	PPISSQN[115]VTVLR	PPISSQDVTVLR	2	656.37
Human	P04216	1 - high confidence	EN[115]TSSSPIQYEFSLTR	EDTSSSPIQYEFSLTR	2	930.44
Human	P04216	1 - high confidence	GHSPPISSQN[115]VTVLR	GHSPPISSQDVTVLR	2	796.926
Human	P04216	1 - high confidence	ALHHSGHSPPISSQN[115]VTVLR	ALHHSGHSPPISSQDVTVLR	2	1069.56
Human	P04216	1 - high confidence	HEN[115]TSSSPIQYE	HEDTSSSPIQYE	2	696.802
Human	P04216	1 - high confidence	SRTN[115]FTSKYN[115]MK	SRTDFTSKYDMK	2	739.854
Human	P04216	1 - high confidence	HHSGHSPPISSQN[115]VTVLR	HHSGHSPPISSQDVTVLR	2	977.501
Human	P04216	1 - high confidence	HEN[115]TSSSPIQYEFSLT	HEDTSSSPIQYEFSLT	2	920.918
Human	P04216	1 - high confidence	HEN[115]TSSSPIQY	HEDTSSSPIQY	2	632.281
Human	P04216	1 - high confidence	LDCRHEN[115]TSSSPIQYEFSLTR	LDCRHEDTSSSPIQYEFSLTR	2	1271.09
Human	P04216	1 - high confidence	LHHSGHSPPISSQN[115]VTVLR	LHHSGHSPPISSQDVTVLR	2	1034.04
Human	P04216	1 - high confidence	TN[115]FTSKYNMK	TDFTSKYNMK	2	617.795
Human	P04216	1 - high confidence	SRTN[115]FTSK	SRTDFTSK	2	471.241
Human	P04216	1 - high confidence	HSGHSPPISSQN[115]VTVLR	HSGHSPPISSQDVTVLR	2	908.972
Human	P04216	1 - high confidence	HEN[115]TSSSPIQYEFS	HEDTSSSPIQYEFS	2	813.853
Human	P04216	1 - high confidence	SPPISSQN[115]VTVLR	SPPISSQDVTVLR	2	699.886
Human	P04216	1 - high confidence	SRTN[115]FTSKYNMK	SRTDFTSKYNMK	2	739.362
Human	P04216	1 - high confidence	HEN[115]TSSSPIQYEF	HEDTSSSPIQYEF	2	770.337
Human	P04216	1 - high confidence	SGHSPPISSQN[115]VTVLR	SGHSPPISSQDVTVLR	2	840.442
Human	P04216	1 - high confidence	DEGTYTCALHHSGHSPPISSQN[115]VTVLR	DEGTYTCALHHSGHSPPISSQDVTVLR	2	1482.7
Human	P04216	1 - high confidence	HEN[115]TSSSPIQYEFSLTR	HEDTSSSPIQYEFSLTR	2	998.969
Human	P04220	3 - unspecific	THTN[115]ISESHPN[115]A	THTDISESHPDA	2	655.289
Human	P04220	3 - unspecific	THTN[115]ISESHPN[115]ATFSA	THTDISESHPDATFSA	2	858.382
Human	P04220	3 - unspecific	THTN[115]ISESHPN[115]ATFSAVG	THTDISESHPDATFSAVG	2	936.427
Human	P04220	3 - unspecific	THTN[115]ISESHPN[115]ATFSAVGEA	THTDISESHPDATFSAVGEA	2	1036.47
Human	P04220	3 - unspecific	THTN[115]ISESHPNAT	THTDISESHPNAT	2	705.321
Human	P04220	3 - unspecific	THTN[115]ISESHPN[115]	THTDISESHPD	2	619.771
Human	P04220	3 - unspecific	GLTFQQN[115]ASSM	GLTFQQDASSM	2	592.769
Human	P04220	3 - unspecific	THTN[115]ISESHPN[115]ATF	THTDISESHPDATF	2	779.347
Human	P04220	3 - unspecific	THTN[115]ISESHPN[115]ATFS	THTDISESHPDATFS	2	822.863
Human	P04220	3 - unspecific	THTN[115]ISESHPN[115]ATFSAVGEAS	THTDISESHPDATFSAVGEAS	2	1079.98
Human	P04220	3 - unspecific	THTN[115]ISESHPN[115]AT	THTDISESHPDAT	2	705.813
Human	P04222	1 - high confidence	GYYN[115]QSEAGSHIIQRMYGCDVGPDGR	GYYDQSEAGSHIIQRMYGCDVGPDGR	2	1466.15
Human	P04222	1 - high confidence	GYYN[115]QSEAGSHIIQ	GYYDQSEAGSHIIQ	2	784.358
Human	P04222	1 - high confidence	NLRGYYN[115]QSEAGSHIIQR	NLRGYYDQSEAGSHIIQR	2	1054.02
Human	P04222	1 - high confidence	N[115]QSEAGSHIIQR	DQSEAGSHIIQR	2	670.834
Human	P04222	1 - high confidence	YN[115]QSEAGSHIIQR	YDQSEAGSHIIQR	2	752.366
Human	P04222	1 - high confidence	YYN[115]QSEAGSHIIQR	YYDQSEAGSHIIQR	2	833.898
Human	P04222	1 - high confidence	GYYN[115]QSEAGSH	GYYDQSEAGSH	2	607.244
Human	P04222	1 - high confidence	GYYN[115]QSEAGSHIIQR	GYYDQSEAGSHIIQR	2	862.408
Human	P04229	1 - high confidence	FFN[115]GTER	FFDGTER	2	436.204
Human	P04229	1 - high confidence	FECHFFN[115]GTERVR	FECHFFDGTERVR	2	850.389
Human	P04229	1 - high confidence	WFRN[115]GQEEK	WFRDGQEEK	2	597.784
Human	P04229	1 - high confidence	CHFFN[115]GTER	CHFFDGTER	2	584.749
Human	P04229	1 - high confidence	AAVDTYCRHN[115]YGVGESFTVQR	AAVDTYCRHDYGVGESFTVQR	2	1216.06
Human	P04229	1 - high confidence	HFFN[115]GTER	HFFDGTER	2	504.733
Human	P04229	1 - high confidence	ECHFFN[115]GTER	ECHFFDGTER	2	649.27
Human	P04229	1 - high confidence	FECHFFN[115]GTER	FECHFFDGTER	2	722.804
Human	P04233	1 - high confidence	LPMGALPQGPMQN[115]ATK	LPMGALPQGPMQDATK	2	827.921
Human	P04233	1 - high confidence	MQALPMGALPQGPMQN[115]ATK	MQALPMGALPQGPMQDATK	2	992.989
Human	P04233	1 - high confidence	PMGALPQGPMQN[115]ATK	PMGALPQGPMQDATK	2	771.379
Human	P04233	1 - high confidence	YGN[115]MTEDHVMHLLQNADPLKVYPPLK	YGDMTEDHVMHLLQNADPLKVYPPLK	2	1512.75
Human	P04233	1 - high confidence	YGN[115]MTEDH	YGDMTEDH	2	484.18
Human	P04233	1 - high confidence	PQGPMQN[115]ATK	PQGPMQDATK	2	536.761
Human	P04233	1 - high confidence	YGN[115]MTEDHVMHLLQN	YGDMTEDHVMHLLQN	2	901.898
Human	P04233	1 - high confidence	YGN[115]MTEDHVMHLLQ	YGDMTEDHVMHLLQ	2	844.877
Human	P04233	1 - high confidence	LPQGPMQN[115]ATK	LPQGPMQDATK	2	593.303
Human	P04233	1 - high confidence	YGN[115]MTEDHVMHL	YGDMTEDHVMHL	2	724.306
Human	P04233	1 - high confidence	YGN[115]MTEDHVMHLL	YGDMTEDHVMHLL	2	780.848
Human	P04233	1 - high confidence	QALPMGALPQGPMQN[115]ATK	QALPMGALPQGPMQDATK	2	927.469
Human	P04233	1 - high confidence	MGALPQGPMQN[115]ATK	MGALPQGPMQDATK	2	722.853
Human	P04233	1 - high confidence	YGN[115]MTEDHVM	YGDMTEDHVM	2	599.234
Human	P04233	1 - high confidence	ATPLLMQALPMGALPQGPMQN[115]ATK	ATPLLMQALPMGALPQGPMQDATK	2	1240.64
Human	P04233	1 - high confidence	GHHN[115]CSESLELEDPSSGLGVTK	GHHDCSESLELEDPSSGLGVTK	2	1177.53
Human	P04233	1 - high confidence	LMQALPMGALPQGPMQN[115]ATK	LMQALPMGALPQGPMQDATK	2	1049.53
Human	P04233	1 - high confidence	YGN[115]MTEDHV	YGDMTEDHV	2	533.714
Human	P04233	1 - high confidence	YGN[115]MTEDHVMHLLQN[115]ADPLK	YGDMTEDHVMHLLQDADPLK	2	1164.54
Human	P04233	1 - high confidence	ALPMGALPQGPMQN[115]ATK	ALPMGALPQGPMQDATK	2	863.44
Human	P04233	1 - high confidence	MATPLLMQALPMGALPQGPMQN[115]ATK	MATPLLMQALPMGALPQGPMQDATK	2	1306.16
Human	P04233	1 - high confidence	ALPQGPMQN[115]ATK	ALPQGPMQDATK	2	628.822
Human	P04233	1 - high confidence	GALPQGPMQN[115]ATK	GALPQGPMQDATK	2	657.333
Human	P04233	1 - high confidence	YGN[115]MTEDHVMH	YGDMTEDHVMH	2	667.764
Human	P04233	1 - high confidence	YGN[115]MTEDHVMHLLQNADPLK	YGDMTEDHVMHLLQNADPLK	2	1164.05
Human	P04234	1 - high confidence	CN[115]GTDIYK	CDGTDIYK	2	486.214
Human	P04264	1 - high confidence	RTN[115]AEN[115]EFVTIK	RTDAEDEFVTIK	2	712.36
Human	P04275	2 - putative	TTCNPCPLGYKEEN[115]NTGECCGR	TTCNPCPLGYKEEDNTGECCGR	2	1309.53
Human	P04275	2 - putative	ASPPSSSCN[115]ISSGEMQK	ASPPSSSCDISSGEMQK	2	884.383
Human	P04275	2 - putative	MEACMLN[115]GTVIGPGK	MEACMLDGTVIGPGK	2	789.873
Human	P04350	2 - putative	FVEWIPN[115]NVK	FVEWIPDNVK	2	623.83
Human	P04350	2 - putative	N[115]SSYFVEWIPN[115]N[115]VK	DSSYFVEWIPDDVK	2	850.399
Human	P04350	2 - putative	NSSYFVEWIPNN[115]VK	NSSYFVEWIPNDVK	2	849.415
Human	P04350	2 - putative	TFIGN[115]STAIQELFK	TFIGDSTAIQELFK	2	785.415
Human	P04350	2 - putative	IGN[115]STAIQELFK	IGDSTAIQELFK	2	661.357
Human	P04350	2 - putative	NSSYFVEWIPN[115]NVK	NSSYFVEWIPDNVK	2	849.415
Human	P04350	2 - putative	LAVN[115]MVPFPR	LAVDMVPFPR	2	572.816
Human	P04350	2 - putative	N[115]SSYFVEWIPNNVK	DSSYFVEWIPNNVK	2	849.415
Human	P04406	3 - unspecific	PTAN[115]VSVVDLTCR	PTADVSVVDLTCR	2	716.862
Human	P04406	3 - unspecific	LISWYDN[115]EFGYSNR	LISWYDDEFGYSNR	2	882.9
Human	P04406	3 - unspecific	GKVKVGVN[115]GFGR	GKVKVGVDGFGR	2	609.854
Human	P04406	3 - unspecific	TAN[115]VSVVDLTCR	TADVSVVDLTCR	2	668.335
Human	P04406	3 - unspecific	LVIN[115]GNPITIFQER	LVIDGNPITIFQER	2	807.949
Human	P04406	3 - unspecific	VPTAN[115]VSVVDLTCRLEKPAK	VPTADVSVVDLTCRLEKPAK	2	1099.6
Human	P04406	3 - unspecific	IISN[115]ASCTTNCLAPLAK	IISDASCTTNCLAPLAK	2	917.959
Human	P04406	3 - unspecific	VGVN[115]GFGR	VGVDGFGR	2	403.714
Human	P04406	3 - unspecific	VPTAN[115]VSVVDLTCR	VPTADVSVVDLTCR	2	766.396
Human	P04435	3 - unspecific	GQN[115]VTFR	GQDVTFR	2	411.712
Human	P04435	3 - unspecific	RGQN[115]VTFR	RGQDVTFR	2	489.762
Human	P04439	1 - high confidence	GYYN[115]QSEAGSHTIQIMYG	GYYDQSEAGSHTIQIMYG	2	1010.44
Human	P04439	1 - high confidence	GYYN[115]QSEAGSHTIQI	GYYDQSEAGSHTIQI	2	834.882
Human	P04439	1 - high confidence	RYLEN[115]GKETLQR	RYLEDGKETLQR	2	754.4
Human	P04439	1 - high confidence	GYYN[115]QSEAGSHTIQIM	GYYDQSEAGSHTIQIM	2	900.402
Human	P04439	1 - high confidence	GYYN[115]QSEAGSHTIQIMY	GYYDQSEAGSHTIQIMY	2	981.934
Human	P04439	1 - high confidence	GYYN[115]QSEAGSHT	GYYDQSEAGSHT	2	657.768
Human	P04439	1 - high confidence	YLEN[115]GKETLQR	YLEDGKETLQR	2	676.349
Human	P04439	1 - high confidence	GYYN[115]QSEAGSHTIQIMYGCDVGSDGR	GYYDQSEAGSHTIQIMYGCDVGSDGR	2	1433.61
Human	P04439	1 - high confidence	GYYN[115]QSEAGSHTIQ	GYYDQSEAGSHTIQ	2	778.34
Human	P04439	1 - high confidence	GYYN[115]QSEAGSHTI	GYYDQSEAGSHTI	2	714.31
Human	P04439	1 - high confidence	GYYN[115]QSEAGSH	GYYDQSEAGSH	2	607.244
Human	P04440	1 - high confidence	AFN[115]GTQR	AFDGTQR	2	397.696
Human	P04440	1 - high confidence	ATPENYLFQGRQECYAFN[115]GTQRFLER	ATPENYLFQGRQECYAFDGTQRFLER	2	1598.75
Human	P04440	1 - high confidence	RATPENYLFQGRQECYAFN[115]GTQRFLER	RATPENYLFQGRQECYAFDGTQRFLER	2	1676.8
Human	P04440	1 - high confidence	VN[115]VSPSK	VDVSPSK	2	366.203
Human	P04440	1 - high confidence	QECYAFN[115]GTQRFLER	QECYAFDGTQRFLER	2	960.442
Human	P04440	1 - high confidence	YAFN[115]GTQR	YAFDGTQR	2	479.228
Human	P04440	1 - high confidence	ATPENYLFQGRQECYAFN[115]GTQR	ATPENYLFQGRQECYAFDGTQR	2	1326.1
Human	P04440	1 - high confidence	RATPENYLFQGRQECYAFN[115]GTQR	RATPENYLFQGRQECYAFDGTQR	2	1404.15
Human	P04440	1 - high confidence	QECYAFN[115]GTQR	QECYAFDGTQR	2	687.794
Human	P04626	1 - high confidence	NNQLALTLIDTN[115]RSR	NNQLALTLIDTDRSR	2	865.466
Human	P04626	1 - high confidence	NQLALTLIDTN[115]R	NQLALTLIDTDR	2	686.878
Human	P04626	1 - high confidence	DIFHKNNQLALTLIDTN[115]RSR	DIFHKNNQLALTLIDTDRSR	2	1185.63
Human	P04626	1 - high confidence	GDPLN[115]N[115]TTPVTGASPGGLR	GDPLDDTTPVTGASPGGLR	2	913.453
Human	P04626	1 - high confidence	GDPLN[115]NTTPVTGASPGGLR	GDPLDNTTPVTGASPGGLR	2	912.961
Human	P04626	1 - high confidence	GTQLFEDNYALAVLDN[115]GDPLN[115]NTTPVTGASPGGLR	GTQLFEDNYALAVLDDGDPLDNTTPVTGASPGGLR	2	1795.37
Human	P04626	1 - high confidence	GTQLFEDNYALAVLDNGDPLNN[115]TTPVTGASPGGLR	GTQLFEDNYALAVLDNGDPLNDTTPVTGASPGGLR	2	1794.88
Human	P04626	1 - high confidence	PLN[115]NTTPVTGASPGGLR	PLDNTTPVTGASPGGLR	2	826.937
Human	P04626	1 - high confidence	PLN[115]N[115]TTPVTGASPGGLR	PLDDTTPVTGASPGGLR	2	827.429
Human	P04626	1 - high confidence	N[115]NQLALTLIDTN[115]R	DNQLALTLIDTDR	2	744.392
Human	P04626	1 - high confidence	HCLPCHPECQPQN[115]GSVTCFGPEADQCVACAH	HCLPCHPECQPQDGSVTCFGPEADQCVACAH	2	1812.72
Human	P04626	1 - high confidence	PDEEGACQPCPIN[115]CTHSCVDLDDK	PDEEGACQPCPIDCTHSCVDLDDK	2	1409.56
Human	P04626	1 - high confidence	GHCWGPGPTQCVN[115]CSQFLR	GHCWGPGPTQCVDCSQFLR	2	1131.49
Human	P04626	1 - high confidence	DEEGACQPCPIN[115]CTHSCVDLDDK	DEEGACQPCPIDCTHSCVDLDDK	2	1361.03
Human	P04626	1 - high confidence	GTQLFEDNYALAVLDNGDPLN[115]NTTPVTGASPGGLR	GTQLFEDNYALAVLDNGDPLDNTTPVTGASPGGLR	2	1794.88
Human	P04626	1 - high confidence	GTQLFEDNYALAVLDNGDPLN[115]N[115]TTPVTGASPGGLR	GTQLFEDNYALAVLDNGDPLDDTTPVTGASPGGLR	2	1795.37
Human	P04626	1 - high confidence	NNQLALTLIDTN[115]R	NNQLALTLIDTDR	2	743.9
Human	P04626	1 - high confidence	FPDEEGACQPCPIN[115]CTHSCVDLDDK	FPDEEGACQPCPIDCTHSCVDLDDK	2	1483.09
Human	P04629	1 - high confidence	DGALDSLHHLPGAEN[115]LTELYIENQQHLQHLELR	DGALDSLHHLPGAEDLTELYIENQQHLQHLELR	2	1902.95
Human	P04629	1 - high confidence	VQVPN[115]ASVDVGDDVLLR	VQVPDASVDVGDDVLLR	2	898.976
Human	P04629	1 - high confidence	SGGLPSLGLTLAN[115]VTSDLNR	SGGLPSLGLTLADVTSDLNR	2	993.532
Human	P04632	1 - high confidence	THYSNIEAN[115]ESEEVR	THYSNIEADESEEVR	2	889.898
Human	P04839	1 - high confidence	N[115]ITVCEQK	DITVCEQK	2	496.743
Human	P04839	1 - high confidence	AESLAVHN[115]ITVCEQK	AESLAVHDITVCEQK	2	850.423
Human	P04839	1 - high confidence	N[115]NSDPYSVALSELGDR	DNSDPYSVALSELGDR	2	869.403
Human	P04839	1 - high confidence	NN[115]SDPYSVALSELGDR	NDSDPYSVALSELGDR	2	869.403
Human	P04839	1 - high confidence	VNNSDPYSVALSELGDRQN[115]ESYLN[115]FAR	VNNSDPYSVALSELGDRQDESYLDFAR	2	1530.72
Human	P04839	1 - high confidence	SVALSELGDRQN[115]ESYLNFAR	SVALSELGDRQDESYLNFAR	2	1135.56
Human	P04839	1 - high confidence	QN[115]ESYLN[115]FAR	QDESYLDFAR	2	622.286
Human	P04839	1 - high confidence	ALSELGDRQN[115]ESYLNFAR	ALSELGDRQDESYLNFAR	2	1042.51
Human	P04839	1 - high confidence	N[115]ESYLNFAR	DESYLNFAR	2	557.765
Human	P04839	1 - high confidence	GQTAESLAVHN[115]I	GQTAESLAVHDI	2	620.815
Human	P04839	1 - high confidence	TAESLAVHN[115]ITVCEQK	TAESLAVHDITVCEQK	2	900.946
Human	P04839	1 - high confidence	VN[115]N[115]SDPYSVALSELGDR	VDDSDPYSVALSELGDR	2	919.429
Human	P04839	1 - high confidence	VNN[115]SDPYSVALSELGDRQN[115]ESYLNFAR	VNDSDPYSVALSELGDRQDESYLNFAR	2	1530.72
Human	P04839	1 - high confidence	AVHN[115]ITVCEQK	AVHDITVCEQK	2	650.325
Human	P04839	1 - high confidence	QN[115]ESYLNFAR	QDESYLNFAR	2	621.794
Human	P04839	1 - high confidence	VN[115]NSDPYSVALSELGDRQN[115]ESYLNFAR	VDNSDPYSVALSELGDRQDESYLNFAR	2	1530.72
Human	P04839	1 - high confidence	VNN[115]SDPYSVALSELGDR	VNDSDPYSVALSELGDR	2	918.937
Human	P04839	1 - high confidence	GQTAESLAVHN[115]ITVCEQK	GQTAESLAVHDITVCEQK	2	993.486
Human	P04839	1 - high confidence	VN[115]NSDPYSVALSELGDR	VDNSDPYSVALSELGDR	2	918.937
Human	P04843	2 - putative	DEIGN[115]VSTSHLLILDDSVEMEIR	DEIGDVSTSHLLILDDSVEMEIR	2	1293.64
Human	P04843	2 - putative	DEIGN[115]VSTSHLL	DEIGDVSTSHLL	2	643.32
Human	P04843	2 - putative	DEIGN[115]VSTSHLLILDDSVEMEIRPR	DEIGDVSTSHLLILDDSVEMEIRPR	2	1420.21
Human	P04843	2 - putative	DEIGN[115]VSTSH	DEIGDVSTSH	2	530.236
Human	P04844	1 - high confidence	SGCEISISN[115]ETK	SGCEISISDETK	2	663.301
Human	P04844	1 - high confidence	AAQASQALSGCEISISN[115]ETK	AAQASQALSGCEISISDETK	2	1033.49
Human	P04844	1 - high confidence	ALSGCEISISN[115]ETK	ALSGCEISISDETK	2	755.362
Human	P04844	1 - high confidence	ASQALSGCEISISN[115]ETK	ASQALSGCEISISDETK	2	898.426
Human	P04920	1 - high confidence	IFQEHPLHGCSASN[115]SSEVDGGEN[115]MTWAGAR	IFQEHPLHGCSASDSSEVDGGEDMTWAGAR	2	1623.7
Human	P05023	1 - high confidence	VDN[115]SSLTGESEPQTR	VDDSSLTGESEPQTR	2	810.874
Human	P05026	1 - high confidence	LN[115]RVLGFKPKPPKNESLETYPVMK	LDRVLGFKPKPPKNESLETYPVMK	2	1393.77
Human	P05026	1 - high confidence	GN[115]CSGLN[115]DETYGYK	GDCSGLDDETYGYK	2	790.317
Human	P05026	1 - high confidence	LEWLGNCSGLN[115]DETYGYK	LEWLGNCSGLDDETYGYK	2	1060.47
Human	P05026	1 - high confidence	FKPKPPKN[115]ESLETYPVMK	FKPKPPKDESLETYPVMK	2	1067.57
Human	P05026	1 - high confidence	LEWLGN[115]CSGLNDETY	LEWLGDCSGLNDETY	2	886.381
Human	P05026	1 - high confidence	LGN[115]CSGLNDETYGYK	LGDCSGLNDETYGYK	2	846.368
Human	P05026	1 - high confidence	GN[115]CSGLNDETYGYK	GDCSGLNDETYGYK	2	789.825
Human	P05026	1 - high confidence	LGFKPKPPKN[115]ESLETYPVMK	LGFKPKPPKDESLETYPVMK	2	1152.62
Human	P05026	1 - high confidence	TN[115]LTMDTEIR	TDLTMDTEIR	2	597.79
Human	P05026	1 - high confidence	LNRVLGFKPKPPKN[115]ESLETYPVMK	LNRVLGFKPKPPKDESLETYPVMK	2	1393.77
Human	P05026	1 - high confidence	FKLEWLGN[115]CSGLNDETYGYK	FKLEWLGDCSGLNDETYGYK	2	1198.05
Human	P05026	1 - high confidence	GFKPKPPKN[115]ESLETYPVMK	GFKPKPPKDESLETYPVMK	2	1096.08
Human	P05026	1 - high confidence	VQFTN[115]LTMDTEIR	VQFTDLTMDTEIR	2	784.888
Human	P05026	1 - high confidence	PPKN[115]ESLETYPVMK	PPKDESLETYPVMK	2	817.414
Human	P05026	1 - high confidence	FTN[115]LTMDTEIR	FTDLTMDTEIR	2	671.324
Human	P05026	1 - high confidence	LEWLGN[115]CSGLN[115]DETYGYK	LEWLGDCSGLDDETYGYK	2	1060.96
Human	P05026	1 - high confidence	AVQFTN[115]LTMDTEIR	AVQFTDLTMDTEIR	2	820.406
Human	P05026	1 - high confidence	YLQPLLAVQFTN[115]LTMDTEIR	YLQPLLAVQFTDLTMDTEIR	2	1184.12
Human	P05026	1 - high confidence	LEWLGN[115]CSGLNDETYGYK	LEWLGDCSGLNDETYGYK	2	1060.47
Human	P05026	1 - high confidence	VLGFKPKPPKN[115]ESLETYPVMK	VLGFKPKPPKDESLETYPVMK	2	1202.16
Human	P05026	1 - high confidence	LAVQFTN[115]LTMDTEIR	LAVQFTDLTMDTEIR	2	876.948
Human	P05026	1 - high confidence	PKPPKN[115]ESLETYPVMK	PKPPKDESLETYPVMK	2	929.988
Human	P05090	2 - putative	CIQAN[115]YSLMEN[115]GK	CIQADYSLMEDGK	2	765.337
Human	P05090	2 - putative	ADGTVNQIEGEATPVN[115]LTEPAKLEVK	ADGTVNQIEGEATPVDLTEPAKLEVK	2	1362.7
Human	P05090	2 - putative	CIQAN[115]YSLMENGK	CIQADYSLMENGK	2	764.845
Human	P05090	2 - putative	ADGTVNQIEGEATPVN[115]LTEPAK	ADGTVNQIEGEATPVDLTEPAK	2	1128.06
Human	P05106	1 - high confidence	SDWTGYYCN[115]CTTR	SDWTGYYCDCTTR	2	842.825
Human	P05106	1 - high confidence	CNN[115]GN[115]GTFECGVCR	CNDGDGTFECGVCR	2	823.806
Human	P05106	1 - high confidence	CNNGN[115]GTFECGVCR	CNNGDGTFECGVCR	2	823.314
Human	P05106	1 - high confidence	DAVN[115]CTYK	DAVDCTYK	2	486.214
Human	P05106	1 - high confidence	DTGKDAVN[115]CTYK	DTGKDAVDCTYK	2	686.809
Human	P05106	1 - high confidence	LRPDDSKN[115]FSIQVR	LRPDDSKDFSIQVR	2	838.445
Human	P05107	1 - high confidence	GQAAAFN[115]VTFR	GQAAAFDVTFR	2	591.802
Human	P05107	1 - high confidence	KLTN[115]NSNQFQTEVGK	KLTDNSNQFQTEVGK	2	854.932
Human	P05107	1 - high confidence	RPGQAAAFN[115]VTFR	RPGQAAAFDVTFR	2	718.379
Human	P05107	1 - high confidence	YLRPGQAAAFN[115]VTFR	YLRPGQAAAFDVTFR	2	856.452
Human	P05107	1 - high confidence	QAAAFN[115]VTFR	QAAAFDVTFR	2	563.291
Human	P05107	1 - high confidence	KDN[115]NSIICSGLGDCVCG	KDDNSIICSGLGDCVCG	2	935.395
Human	P05107	1 - high confidence	DNN[115]SIICSGLGDCVCGQCLCHTSDVPGK	DNDSIICSGLGDCVCGQCLCHTSDVPGK	2	1562.65
Human	P05107	1 - high confidence	HVLKLTNN[115]SNQFQTEVGK	HVLKLTNDSNQFQTEVGK	2	1029.54
Human	P05107	1 - high confidence	KDNN[115]SIICSGLGDCVCG	KDNDSIICSGLGDCVCG	2	935.395
Human	P05107	1 - high confidence	KDNN[115]SIICSGLGDCVCGQCLCH	KDNDSIICSGLGDCVCGQCLCH	2	1284.53
Human	P05107	1 - high confidence	KDN[115]NSIICSGLGDCV	KDDNSIICSGLGDCV	2	826.869
Human	P05107	1 - high confidence	HVLKLTNNSN[115]QFQTEVGK	HVLKLTNNSDQFQTEVGK	2	1029.54
Human	P05107	1 - high confidence	KDNN[115]SIICSGLGDCVCGQ	KDNDSIICSGLGDCVCGQ	2	999.425
Human	P05107	1 - high confidence	LTNNSN[115]QFQTEVGK	LTNNSDQFQTEVGK	2	790.884
Human	P05107	1 - high confidence	NN[115]SNQFQTEVGK	NDSNQFQTEVGK	2	683.818
Human	P05107	1 - high confidence	N[115]NSNQFQTEVGK	DNSNQFQTEVGK	2	683.818
Human	P05107	1 - high confidence	LTNN[115]SN[115]QFQTEVGK	LTNDSDQFQTEVGK	2	791.376
Human	P05107	1 - high confidence	AAFN[115]VTFR	AAFDVTFR	2	463.743
Human	P05107	1 - high confidence	HVLKLTN[115]NSNQFQTEVGK	HVLKLTDNSNQFQTEVGK	2	1029.54
Human	P05107	1 - high confidence	KDNN[115]SIICSGLGDCVCGQCLCHTSDVPGK	KDNDSIICSGLGDCVCGQCLCHTSDVPGK	2	1626.7
Human	P05107	1 - high confidence	DN[115]NSIICSGLGDCVCGQCLCHTSDVPGK	DDNSIICSGLGDCVCGQCLCHTSDVPGK	2	1562.65
Human	P05107	1 - high confidence	KDN[115]NSIICSGLGDCVCGQCLCH	KDDNSIICSGLGDCVCGQCLCH	2	1284.53
Human	P05107	1 - high confidence	KDN[115]NSIICSGLGDCVCGQ	KDDNSIICSGLGDCVCGQ	2	999.425
Human	P05107	1 - high confidence	KDN[115]N[115]SIICSGLGDCVCGQCLCHTSDVPGK	KDDDSIICSGLGDCVCGQCLCHTSDVPGK	2	1627.19
Human	P05107	1 - high confidence	LTN[115]N[115]SN[115]QFQTEVGK	LTDDSDQFQTEVGK	2	791.868
Human	P05107	1 - high confidence	N[115]FTGPGDPDSIR	DFTGPGDPDSIR	2	638.797
Human	P05107	1 - high confidence	AFN[115]VTFR	AFDVTFR	2	428.225
Human	P05107	1 - high confidence	TN[115]NSNQFQTEVGK	TDNSNQFQTEVGK	2	734.342
Human	P05107	1 - high confidence	KDN[115]NSIICSGLGDCVCGQCLCHTSDVPGK	KDDNSIICSGLGDCVCGQCLCHTSDVPGK	2	1626.7
Human	P05107	1 - high confidence	LTNN[115]SNQFQTEVGK	LTNDSNQFQTEVGK	2	790.884
Human	P05107	1 - high confidence	N[115]CSAACPGLQLSNNPVK	DCSAACPGLQLSNNPVK	2	915.93
Human	P05107	1 - high confidence	PGQAAAFN[115]VTFR	PGQAAAFDVTFR	2	640.328
Human	P05107	1 - high confidence	LRPGQAAAFN[115]VTFR	LRPGQAAAFDVTFR	2	774.921
Human	P05107	1 - high confidence	LTN[115]N[115]SNQFQTEVGK	LTDDSNQFQTEVGK	2	791.376
Human	P05107	1 - high confidence	LTN[115]NSN[115]QFQTEVGK	LTDNSDQFQTEVGK	2	791.376
Human	P05107	1 - high confidence	LN[115]FTGPGDPDSIR	LDFTGPGDPDSIR	2	695.339
Human	P05107	1 - high confidence	LTN[115]NSNQFQTEVGK	LTDNSNQFQTEVGK	2	790.884
Human	P05120	2 - putative	SLSSAIN[115]ASTGNYLLESVNK	SLSSAIDASTGNYLLESVNK	2	1035.03
Human	P05155	2 - putative	MLFVEPILEVSSLPTTN[115]STTNSATK	MLFVEPILEVSSLPTTDSTTNSATK	2	1341.19
Human	P05155	2 - putative	NPN[115]ATSSSSQDPESLQDR	NPDATSSSSQDPESLQDR	2	967.425
Human	P05164	3 - unspecific	FQDNGRALLPFDNLHDDPCLLTN[115]RSAR	FQDNGRALLPFDNLHDDPCLLTDRSAR	2	1578.77
Human	P05164	3 - unspecific	YRSYN[115]DSVDPR	YRSYDDSVDPR	2	686.813
Human	P05164	3 - unspecific	YN[115]DSVDPR	YDDSVDPR	2	483.715
Human	P05164	3 - unspecific	RPFN[115]VTDVLTPA	RPFDVTDVLTPA	2	665.857
Human	P05164	3 - unspecific	RPFN[115]VTDVLTPAQL	RPFDVTDVLTPAQL	2	786.428
Human	P05164	3 - unspecific	ALLPFDNLHDDPCLLTN[115]RSAR	ALLPFDNLHDDPCLLTDRSAR	2	1220.11
Human	P05164	3 - unspecific	PFDNLHDDPCLLTN[115]R	PFDNLHDDPCLLTDR	2	914.423
Human	P05164	3 - unspecific	SYN[115]DSVDPRIANVFTNAFR	SYDDSVDPRIANVFTNAFR	2	1094.03
Human	P05164	3 - unspecific	DHGLPGYN[115]AWRR	DHGLPGYDAWRR	2	721.853
Human	P05164	3 - unspecific	N[115]GFPVALAR	DGFPVALAR	2	473.264
Human	P05164	3 - unspecific	N[115]VTDVLTPAQLNVLSK	DVTDVLTPAQLNVLSK	2	856.978
Human	P05164	3 - unspecific	NLRNMSN[115]QLGLLAVNQR	NLRNMSDQLGLLAVNQR	2	971.521
Human	P05164	3 - unspecific	RPFN[115]VTDVLTPAQLN[115]VLSK	RPFDVTDVLTPAQLDVLSK	2	1057.58
Human	P05164	3 - unspecific	NLRN[115]MSNQLGLLAV	NLRDMSNQLGLLAV	2	772.42
Human	P05164	3 - unspecific	NLRN[115]MSNQLGLLAVNQ	NLRDMSNQLGLLAVNQ	2	893.47
Human	P05164	3 - unspecific	N[115]LRNMSNQLGLLAVNQR	DLRNMSNQLGLLAVNQR	2	971.521
Human	P05164	3 - unspecific	PACPGSN[115]ITIR	PACPGSDITIR	2	593.801
Human	P05164	3 - unspecific	FN[115]VTDVLTPAQLNVLSK	FDVTDVLTPAQLNVLSK	2	930.512
Human	P05164	3 - unspecific	RPFN[115]VTDVLTPAQLN	RPFDVTDVLTPAQLN	2	843.449
Human	P05164	3 - unspecific	N[115]MSNQLGLLAVNQR	DMSNQLGLLAVNQR	2	779.907
Human	P05164	3 - unspecific	RPFN[115]VTDVLTPAQLNVL	RPFDVTDVLTPAQLNVL	2	949.526
Human	P05164	3 - unspecific	RPFN[115]VTDVLTPAQLNVLS	RPFDVTDVLTPAQLNVLS	2	993.042
Human	P05164	3 - unspecific	ALLPFDNLHDDPCLLTN[115]R	ALLPFDNLHDDPCLLTDR	2	1063.03
Human	P05164	3 - unspecific	RPFN[115]VTDVLTPAQLNV	RPFDVTDVLTPAQLNV	2	892.984
Human	P05164	3 - unspecific	PFN[115]VTDVLTPAQLNVLSK	PFDVTDVLTPAQLNVLSK	2	979.039
Human	P05164	3 - unspecific	RPFN[115]VTDVLTPAQLNVLSK	RPFDVTDVLTPAQLNVLSK	2	1057.09
Human	P05164	3 - unspecific	SCPACPGSN[115]ITIR	SCPACPGSDITIR	2	717.332
Human	P05164	3 - unspecific	NLRN[115]MSNQLGLLAVNQR	NLRDMSNQLGLLAVNQR	2	971.521
Human	P05164	3 - unspecific	SYN[115]DSVDPR	SYDDSVDPR	2	527.231
Human	P05164	3 - unspecific	PGSN[115]ITIR	PGSDITIR	2	429.741
Human	P05186	1 - high confidence	CN[115]TTQGN[115]EVTSILR	CDTTQGDEVTSILR	2	797.876
Human	P05186	1 - high confidence	SRCN[115]TTQGN[115]EVTSILR	SRCDTTQGDEVTSILR	2	919.442
Human	P05186	1 - high confidence	EN[115]VSMVDYAHNN[115]YQAQSAVPLR	EDVSMVDYAHNDYQAQSAVPLR	2	1254.58
Human	P05186	1 - high confidence	ENVSMVDYAHN[115]N[115]YQAQSAVPLR	ENVSMVDYAHDDYQAQSAVPLR	2	1254.58
Human	P05186	1 - high confidence	ENVSMVDYAHN[115]NYQAQSAVPLR	ENVSMVDYAHDNYQAQSAVPLR	2	1254.09
Human	P05186	1 - high confidence	KYMYPKN[115]KTDVEYESDEKAR	KYMYPKDKTDVEYESDEKAR	2	1248.09
Human	P05186	1 - high confidence	EN[115]VSMVDYAHN[115]NYQAQSAVPLR	EDVSMVDYAHDNYQAQSAVPLR	2	1254.58
Human	P05186	1 - high confidence	CN[115]TTQGNEVTSILR	CDTTQGNEVTSILR	2	797.384
Human	P05186	1 - high confidence	N[115]KTDVEYESDEKAR	DKTDVEYESDEKAR	2	842.89
Human	P05186	1 - high confidence	YMYPKN[115]KTDVEYESDEKAR	YMYPKDKTDVEYESDEKAR	2	1184.05
Human	P05186	1 - high confidence	VVGGEREN[115]VSMVDYAHNNYQAQSAVPLR	VVGGEREDVSMVDYAHNNYQAQSAVPLR	2	1552.75
Human	P05186	1 - high confidence	SRCN[115]TTQGNEVTSILR	SRCDTTQGNEVTSILR	2	918.95
Human	P05186	1 - high confidence	EN[115]VSMVDYAHNNYQAQSAVPLR	EDVSMVDYAHNNYQAQSAVPLR	2	1254.09
Human	P05186	1 - high confidence	N[115]KTDVEYESDEK	DKTDVEYESDEK	2	729.321
Human	P05187	1 - high confidence	FNQCN[115]TTRGNEVISVMNR	FNQCDTTRGNEVISVMNR	2	1071
Human	P05187	1 - high confidence	FNQCN[115]TTR	FNQCDTTR	2	521.228
Human	P05362	1 - high confidence	AN[115]LTVVLLRG	ADLTVVLLRG	2	528.827
Human	P05362	1 - high confidence	CPGN[115]WTWPENSQQTPMCQAWGNPLPELK	CPGDWTWPENSQQTPMCQAWGNPLPELK	2	1664.24
Human	P05362	1 - high confidence	TELDLRPQGLELFEN[115]	TELDLRPQGLELFED	2	887.95
Human	P05362	1 - high confidence	LTCAVILGN[115]QSQE	LTCAVILGDQSQE	2	717.354
Human	P05362	1 - high confidence	AN[115]LTVVLLRGEK	ADLTVVLLRGEK	2	657.396
Human	P05362	1 - high confidence	LTCAVILGN[115]QSQETLQTV	LTCAVILGDQSQETLQTV	2	988.507
Human	P05362	1 - high confidence	TELDLRPQGLELFEN[115]TSAPYQ	TELDLRPQGLELFEDTSAPYQ	2	1211.6
Human	P05362	1 - high confidence	TELDLRPQGLELFEN[115]TSAPYQL	TELDLRPQGLELFEDTSAPYQL	2	1268.14
Human	P05362	1 - high confidence	TELDLRPQGLELFEN[115]T	TELDLRPQGLELFEDT	2	938.473
Human	P05362	1 - high confidence	TELDLRPQGLELFEN[115]TSAPYQLQT	TELDLRPQGLELFEDTSAPYQLQT	2	1382.69
Human	P05362	1 - high confidence	TELDLRPQGLELFEN[115]TSAPYQLQ	TELDLRPQGLELFEDTSAPYQLQ	2	1332.17
Human	P05362	1 - high confidence	YGN[115]DSFSAK	YGDDSFSAK	2	495.217
Human	P05362	1 - high confidence	N[115]LTVVLLR	DLTVVLLR	2	464.798
Human	P05362	1 - high confidence	DCPGN[115]WTWPENSQQTPM	DCPGDWTWPENSQQTPM	2	1024.91
Human	P05362	1 - high confidence	HHGAN[115]FSCR	HHGADFSCR	2	543.733
Human	P05362	1 - high confidence	HGAN[115]FSCR	HGADFSCR	2	475.204
Human	P05362	1 - high confidence	DCPGN[115]WTWPENSQQTPMCQAWGNPLPELK	DCPGDWTWPENSQQTPMCQAWGNPLPELK	2	1721.75
Human	P05362	1 - high confidence	DHHGAN[115]FSC	DHHGADFSC	2	523.196
Human	P05362	1 - high confidence	NPTVTYGN[115]DSFSAK	NPTVTYGDDSFSAK	2	751.347
Human	P05362	1 - high confidence	TELDLRPQGLELFEN[115]TSAPY	TELDLRPQGLELFEDTSAPY	2	1147.57
Human	P05362	1 - high confidence	VTYGN[115]DSFSAK	VTYGDDSFSAK	2	595.275
Human	P05362	1 - high confidence	N[115]PTVTYGN[115]DSFSAK	DPTVTYGDDSFSAK	2	751.839
Human	P05362	1 - high confidence	RDHHGAN[115]FSCR	RDHHGADFSCR	2	679.297
Human	P05362	1 - high confidence	TELDLRPQGLELFEN[115]TSAPYQLQTF	TELDLRPQGLELFEDTSAPYQLQTF	2	1456.22
Human	P05362	1 - high confidence	PTVTYGN[115]DSFSAK	PTVTYGDDSFSAK	2	694.325
Human	P05362	1 - high confidence	AN[115]LTVVLLR	ADLTVVLLR	2	500.317
Human	P05362	1 - high confidence	DHHGAN[115]FSCR	DHHGADFSCR	2	601.247
Human	P05362	1 - high confidence	LN[115]PTVTYGN[115]DSFSAK	LDPTVTYGDDSFSAK	2	808.381
Human	P05362	1 - high confidence	LNPTVTYGN[115]DSFSAK	LNPTVTYGDDSFSAK	2	807.889
Human	P05387	3 - unspecific	YVASYLLAALGGN[115]SSPSAK	YVASYLLAALGGDSSPSAK	2	935.486
Human	P05534	1 - high confidence	YYN[115]QSEAGSHTLQMM	YYDQSEAGSHTLQMM	2	880.869
Human	P05534	1 - high confidence	RYLEN[115]GKETLQR	RYLEDGKETLQR	2	754.4
Human	P05534	1 - high confidence	YYN[115]QSEAGSHT	YYDQSEAGSHT	2	629.258
Human	P05534	1 - high confidence	YYN[115]QSEAGSHTL	YYDQSEAGSHTL	2	685.8
Human	P05534	1 - high confidence	YYN[115]QSEAGSHTLQM	YYDQSEAGSHTLQM	2	815.349
Human	P05534	1 - high confidence	YLEN[115]GKETLQR	YLEDGKETLQR	2	676.349
Human	P05534	1 - high confidence	YYN[115]QSEAGSHTLQ	YYDQSEAGSHTLQ	2	749.829
Human	P05534	1 - high confidence	YYN[115]QSEAGSHTLQMMFGCDVGSDGR	YYDQSEAGSHTLQMMFGCDVGSDGR	2	1406.08
Human	P05534	1 - high confidence	YYN[115]QSEAGSH	YYDQSEAGSH	2	578.734
Human	P05538	1 - high confidence	YFTN[115]GTER	YFTDGTER	2	494.725
Human	P05538	1 - high confidence	TEALNHHN[115]LLVCSVTDFYPAQIK	TEALNHHDLLVCSVTDFYPAQIK	2	1336.17
Human	P05538	1 - high confidence	GMCYFTN[115]GTERVR	GMCYFTDGTERVR	2	796.356
Human	P05538	1 - high confidence	GMCYFTN[115]GTER	GMCYFTDGTER	2	668.771
Human	P05556	1 - high confidence	SYFN[115]ITK	SYFDITK	2	437.224
Human	P05556	1 - high confidence	DTCTQECSYFN[115]ITKVESR	DTCTQECSYFDITKVESR	2	1119.99
Human	P05556	1 - high confidence	CSYFN[115]ITK	CSYFDITK	2	517.24
Human	P05556	1 - high confidence	KEN[115]SSEICSNN[115]G	KEDSSEICSNDG	2	670.77
Human	P05556	1 - high confidence	KEN[115]SSEICSNNG	KEDSSEICSNNG	2	670.278
Human	P05556	1 - high confidence	NPCTSEQN[115]CTSPFS	NPCTSEQDCTSPFS	2	815.314
Human	P05556	1 - high confidence	CHEGN[115]GTFECGA	CHEGDGTFECGA	2	670.241
Human	P05556	1 - high confidence	SYFN[115]ITKVESR	SYFDITKVESR	2	672.846
Human	P05556	1 - high confidence	NPCTSEQN[115]CTSPFSYKNVLSLTNK	NPCTSEQDCTSPFSYKNVLSLTNK	2	1395.64
Human	P05556	1 - high confidence	SAVGTLSAN[115]SSNVIQLI	SAVGTLSADSSNVIQLI	2	837.952
Human	P05556	1 - high confidence	KEN[115]SSEICSNNGECVCGQCVC	KEDSSEICSNNGECVCGQCVC	2	1246.47
Human	P05556	1 - high confidence	N[115]GVN[115]GTGENGR	DGVDGTGENGR	2	538.737
Human	P05556	1 - high confidence	SCGECIQAGPN[115]CGWCTNSTFLQEGMPTSAR	SCGECIQAGPDCGWCTNSTFLQEGMPTSAR	2	1689.19
Human	P05556	1 - high confidence	VCECNPN[115]YTGSACDCSLDTSTCEASN[115]GQICN[115]GR	VCECNPDYTGSACDCSLDTSTCEASDGQICDGR	2	1880.7
Human	P05556	1 - high confidence	KEN[115]SSEICSNNGECV	KEDSSEICSNNGECV	2	864.349
Human	P05556	1 - high confidence	KEN[115]SSEICSNNGECVCGQC	KEDSSEICSNNGECVCGQC	2	1116.92
Human	P05556	1 - high confidence	SAVGTLSAN[115]SSNV	SAVGTLSADSSNV	2	604.297
Human	P05556	1 - high confidence	ENSSEICSN[115]N[115]GECVCGQCVCR	ENSSEICSDDGECVCGQCVCR	2	1260.96
Human	P05556	1 - high confidence	KEN[115]SSEICSNN[115]GEC	KEDSSEICSNDGEC	2	815.307
Human	P05556	1 - high confidence	KENSSEICSNN[115]GECVCGQCVCR	KENSSEICSNDGECVCGQCVCR	2	1324.52
Human	P05556	1 - high confidence	N[115]PCTSEQN[115]CTSPF	DPCTSEQDCTSPF	2	772.29
Human	P05556	1 - high confidence	SYCKN[115]GVN[115]GTGENGRK	SYCKDGVDGTGENGRK	2	871.895
Human	P05556	1 - high confidence	SYCKNGVN[115]GTGEN[115]GRK	SYCKNGVDGTGEDGRK	2	871.895
Human	P05556	1 - high confidence	KEN[115]SSEICSNNGE	KEDSSEICSNNGE	2	734.799
Human	P05556	1 - high confidence	GVN[115]GTGENGR	GVDGTGENGR	2	481.223
Human	P05556	1 - high confidence	EN[115]SSEICSN[115]NGECVCGQCVCR	EDSSEICSDNGECVCGQCVCR	2	1260.96
Human	P05556	1 - high confidence	ENSSEICSNN[115]GECVCGQCVCR	ENSSEICSNDGECVCGQCVCR	2	1260.47
Human	P05556	1 - high confidence	KEN[115]SSEICSN[115]N	KEDSSEICSDN	2	642.259
Human	P05556	1 - high confidence	KEN[115]SSEICSNN[115]GECVCGQC	KEDSSEICSNDGECVCGQC	2	1117.41
Human	P05556	1 - high confidence	N[115]PCTSEQNCTSPFSYK	DPCTSEQNCTSPFSYK	2	960.894
Human	P05556	1 - high confidence	SNN[115]GECVCGQCVCR	SNDGECVCGQCVCR	2	850.819
Human	P05556	1 - high confidence	NPCTSEQN[115]CTSPFSYKN	NPCTSEQDCTSPFSYKN	2	1017.92
Human	P05556	1 - high confidence	NPCTSEQN[115]CTSPFSYKNVLSLTNKG	NPCTSEQDCTSPFSYKNVLSLTNKG	2	1424.15
Human	P05556	1 - high confidence	KDTCTQECSYFN[115]ITKVESR	KDTCTQECSYFDITKVESR	2	1184.04
Human	P05556	1 - high confidence	KEN[115]SSEICSN[115]N[115]GECVCGQ	KEDSSEICSDDGECVCGQ	2	1037.89
Human	P05556	1 - high confidence	KEN[115]SSEICSNN[115]	KEDSSEICSND	2	642.259
Human	P05556	1 - high confidence	KEN[115]SSEICSNNGEC	KEDSSEICSNNGEC	2	814.815
Human	P05556	1 - high confidence	NPCTSEQN[115]CTSPFSYKNVLSLTNKGEVFNELVGK	NPCTSEQDCTSPFSYKNVLSLTNKGEVFNELVGK	2	1931.92
Human	P05556	1 - high confidence	SEQN[115]CTSPFSYK	SEQDCTSPFSYK	2	724.807
Human	P05556	1 - high confidence	EN[115]SSEICSNN[115]GECVCGQ	EDSSEICSNDGECVCGQ	2	973.349
Human	P05556	1 - high confidence	NGVN[115]GTGEN[115]GRK	NGVDGTGEDGRK	2	602.784
Human	P05556	1 - high confidence	SAVGTLSAN[115]SSNVIQL	SAVGTLSADSSNVIQL	2	781.41
Human	P05556	1 - high confidence	SAVGTLSAN[115]SSNVI	SAVGTLSADSSNVI	2	660.839
Human	P05556	1 - high confidence	LRNPCTSEQN[115]CTSPFS	LRNPCTSEQDCTSPFS	2	949.907
Human	P05556	1 - high confidence	HEGN[115]GTFECGACR	HEGDGTFECGACR	2	748.291
Human	P05556	1 - high confidence	LRNPCTSEQN[115]CTSPFSY	LRNPCTSEQDCTSPFSY	2	1031.44
Human	P05556	1 - high confidence	KENSSEICSN[115]N[115]GECVCGQCVCR	KENSSEICSDDGECVCGQCVCR	2	1325.01
Human	P05556	1 - high confidence	TQECSYFN[115]ITK	TQECSYFDITK	2	696.314
Human	P05556	1 - high confidence	TCTQECSYFN[115]ITK	TCTQECSYFDITK	2	826.853
Human	P05556	1 - high confidence	SCGECIQAGPN[115]CGWCTN[115]STFLQEGMPTSAR	SCGECIQAGPDCGWCTDSTFLQEGMPTSAR	2	1689.69
Human	P05556	1 - high confidence	N[115]GECVCGQCVCR	DGECVCGQCVCR	2	750.281
Human	P05556	1 - high confidence	EGN[115]GTFECGACR	EGDGTFECGACR	2	679.762
Human	P05556	1 - high confidence	EN[115]SSEICSNNGECVCGQ	EDSSEICSNNGECVCGQ	2	972.857
Human	P05556	1 - high confidence	NPCTSEQN[115]CTSPFSY	NPCTSEQDCTSPFSY	2	896.846
Human	P05556	1 - high confidence	SYCKN[115]GVN[115]GTGEN[115]GR	SYCKDGVDGTGEDGR	2	808.339
Human	P05556	1 - high confidence	SLSSEVILEN[115]GK	SLSSEVILEDGK	2	638.838
Human	P05556	1 - high confidence	SYCKN[115]GVN[115]GTGEN[115]GRK	SYCKDGVDGTGEDGRK	2	872.387
Human	P05556	1 - high confidence	KEN[115]SSEICSNN	KEDSSEICSNN	2	641.767
Human	P05556	1 - high confidence	KEN[115]SSEICSN[115]NGECVCGQCVCR	KEDSSEICSDNGECVCGQCVCR	2	1325.01
Human	P05556	1 - high confidence	SAVGTLSAN[115]SSNVIQ	SAVGTLSADSSNVIQ	2	724.868
Human	P05556	1 - high confidence	NSLSSEVILEN[115]GK	NSLSSEVILEDGK	2	695.86
Human	P05556	1 - high confidence	SYCKNGVN[115]GTGENGR	SYCKNGVDGTGENGR	2	807.355
Human	P05556	1 - high confidence	SYCKNGVN[115]GTGENGRK	SYCKNGVDGTGENGRK	2	871.403
Human	P05556	1 - high confidence	N[115]PCTSEQN[115]CTSPFSYK	DPCTSEQDCTSPFSYK	2	961.386
Human	P05556	1 - high confidence	CGWCTN[115]STFLQEGMPTSAR	CGWCTDSTFLQEGMPTSAR	2	1102.47
Human	P05556	1 - high confidence	KEN[115]SSEICSN	KEDSSEICSN	2	584.746
Human	P05556	1 - high confidence	CTN[115]STFLQEGMPTSAR	CTDSTFLQEGMPTSAR	2	900.901
Human	P05556	1 - high confidence	N[115]GVN[115]GTGEN[115]GRK	DGVDGTGEDGRK	2	603.276
Human	P05556	1 - high confidence	KEN[115]SSEICSN[115]N[115]GECVCGQCVCR	KEDSSEICSDDGECVCGQCVCR	2	1325.5
Human	P05556	1 - high confidence	SCGECIQAGPNCGWCTN[115]STFLQEGMPTSAR	SCGECIQAGPNCGWCTDSTFLQEGMPTSAR	2	1689.19
Human	P05556	1 - high confidence	SSEVILEN[115]GK	SSEVILEDGK	2	538.78
Human	P05556	1 - high confidence	TN[115]STFLQEGMPTSAR	TDSTFLQEGMPTSAR	2	820.886
Human	P05556	1 - high confidence	NGVN[115]GTGENGRK	NGVDGTGENGRK	2	602.292
Human	P05556	1 - high confidence	KEN[115]SSEICSN[115]NGECVCGQ	KEDSSEICSDNGECVCGQ	2	1037.4
Human	P05556	1 - high confidence	SAVGTLSAN[115]SSN	SAVGTLSADSSN	2	554.762
Human	P05556	1 - high confidence	LRNPCTSEQN[115]CTSPF	LRNPCTSEQDCTSPF	2	906.391
Human	P05556	1 - high confidence	LRNPCTSEQN[115]CTSPFSYK	LRNPCTSEQDCTSPFSYK	2	1095.49
Human	P05556	1 - high confidence	EN[115]SSEICSNN[115]GECVCGQCVCR	EDSSEICSNDGECVCGQCVCR	2	1260.96
Human	P05556	1 - high confidence	KEN[115]SSEICSNN[115]GECVCGQ	KEDSSEICSNDGECVCGQ	2	1037.4
Human	P05556	1 - high confidence	EN[115]SSEICSNNGECVCGQCVCR	EDSSEICSNNGECVCGQCVCR	2	1260.47
Human	P05556	1 - high confidence	NGVN[115]GTGEN[115]GR	NGVDGTGEDGR	2	538.737
Human	P05556	1 - high confidence	NPCTSEQN[115]CTSPF	NPCTSEQDCTSPF	2	771.798
Human	P05556	1 - high confidence	TSEQN[115]CTSPFSYK	TSEQDCTSPFSYK	2	775.33
Human	P05556	1 - high confidence	CTSEQN[115]CTSPFSYK	CTSEQDCTSPFSYK	2	855.346
Human	P05556	1 - high confidence	PCTSEQN[115]CTSPFSYK	PCTSEQDCTSPFSYK	2	903.872
Human	P05556	1 - high confidence	KEN[115]SSEICSNNGECVCGQ	KEDSSEICSNNGECVCGQ	2	1036.9
Human	P05556	1 - high confidence	DTCTQECSYFN[115]ITK	DTCTQECSYFDITK	2	884.367
Human	P05556	1 - high confidence	KDTCTQECSYFN[115]ITK	KDTCTQECSYFDITK	2	948.414
Human	P05556	1 - high confidence	KEN[115]SSEICSNNGECVCGQCVCR	KEDSSEICSNNGECVCGQCVCR	2	1324.52
Human	P05556	1 - high confidence	N[115]GVN[115]GTGEN[115]GR	DGVDGTGEDGR	2	539.229
Human	P05556	1 - high confidence	CHEGN[115]GTFECGACR	CHEGDGTFECGACR	2	828.306
Human	P05556	1 - high confidence	KEN[115]SSEICSNN[115]GECVCGQCVCR	KEDSSEICSNDGECVCGQCVCR	2	1325.01
Human	P05556	1 - high confidence	NGVN[115]GTGENGR	NGVDGTGENGR	2	538.245
Human	P05556	1 - high confidence	NPCTSEQN[115]CTSPFSYK	NPCTSEQDCTSPFSYK	2	960.894
Human	P05997	2 - putative	EASQN[115]ITYICK	EASQDITYICK	2	664.317
Human	P06127	1 - high confidence	SFSN[115]CSHSR	SFSDCSHSR	2	541.723
Human	P06127	1 - high confidence	LVTYTPQSSIICYGQLGSFSN[115]CSHSR	LVTYTPQSSIICYGQLGSFSDCSHSR	2	1482.19
Human	P06127	1 - high confidence	QN[115]SSCTSLEHCFR	QDSSCTSLEHCFR	2	813.838
Human	P06127	1 - high confidence	SN[115]CSHSR	SDCSHSR	2	424.672
Human	P06127	1 - high confidence	CYGQLGSFSN[115]CSHSR	CYGQLGSFSDCSHSR	2	880.862
Human	P06127	1 - high confidence	N[115]SSCTSLEHCFR	DSSCTSLEHCFR	2	749.809
Human	P06127	1 - high confidence	LGSFSN[115]CSHSR	LGSFSDCSHSR	2	626.775
Human	P06127	1 - high confidence	GSFSN[115]CSHSR	GSFSDCSHSR	2	570.233
Human	P06127	1 - high confidence	IQN[115]SSCTSLEHC	IQDSSCTSLEHC	2	718.796
Human	P06127	1 - high confidence	GQLGSFSN[115]CSHSR	GQLGSFSDCSHSR	2	719.315
Human	P06127	1 - high confidence	IQN[115]SSCTSLEH	IQDSSCTSLEH	2	638.78
Human	P06127	1 - high confidence	IQN[115]SSCTSLEHCFR	IQDSSCTSLEHCFR	2	870.38
Human	P06213	1 - high confidence	SPGN[115]YSVR	SPGDYSVR	2	440.715
Human	P06213	1 - high confidence	SN[115]SSSQIILK	SDSSSQIILK	2	539.296
Human	P06213	1 - high confidence	PGN[115]YSVR	PGDYSVR	2	397.199
Human	P06213	1 - high confidence	CVN[115]FSFCQDLHHK	CVDFSFCQDLHHK	2	846.87
Human	P06213	1 - high confidence	LHELEN[115]CSVIEGH	LHELEDCSVIEGH	2	769.354
Human	P06213	1 - high confidence	TWSPPFESEDSQKHN[115]QSEYEDSAGECCSCPK	TWSPPFESEDSQKHDQSEYEDSAGECCSCPK	2	1839.23
Human	P06213	1 - high confidence	PSVPLDPISVSN[115]SSSQIILK	PSVPLDPISVSDSSSQIILK	2	1041.57
Human	P06213	1 - high confidence	SHGCTAEGLCCHSECLGN[115]CSQPDDPTK	SHGCTAEGLCCHSECLGDCSQPDDPTK	2	1539.59
Human	P06213	1 - high confidence	ELGLYNLMN[115]ITR	ELGLYNLMDITR	2	719.377
Human	P06213	1 - high confidence	HN[115]QSEYEDSAGECCSCPK	HDQSEYEDSAGECCSCPK	2	1079.89
Human	P06213	1 - high confidence	GETLEIGN[115]YSFYALDNQNLR	GETLEIGDYSFYALDNQNLR	2	1159.55
Human	P06213	1 - high confidence	GLSPGN[115]YSVR	GLSPGDYSVR	2	525.767
Human	P06213	1 - high confidence	HN[115]LTITQGK	HDLTITQGK	2	506.778
Human	P06276	1 - high confidence	YGNPN[115]ETQN[115]N[115]STSWPVFK	YGNPDETQDDSTSWPVFK	2	1043.46
Human	P06276	1 - high confidence	YGNPNETQN[115]N[115]STSWPVFK	YGNPNETQDDSTSWPVFK	2	1042.97
Human	P06276	1 - high confidence	DN[115]NSIITR	DDNSIITR	2	467.238
Human	P06276	1 - high confidence	WSDIWN[115]ATK	WSDIWDATK	2	561.27
Human	P06280	3 - unspecific	LGIYADVGN[115]K	LGIYADVGDK	2	525.78
Human	P06729	1 - high confidence	MN[115]GTDPELNLYQDGK	MDGTDPELNLYQDGK	2	848.383
Human	P06729	1 - high confidence	N[115]GTDPELNLYQDGK	DGTDPELNLYQDGK	2	782.863
Human	P06729	1 - high confidence	EVMN[115]GTDPELNLYQDGK	EVMDGTDPELNLYQDGK	2	962.439
Human	P06729	1 - high confidence	ISWTCIN[115]TTLTCEVMN[115]GTDPELNLYQDGK	ISWTCIDTTLTCEVMDGTDPELNLYQDGK	2	1688.26
Human	P06733	1 - high confidence	KLN[115]VTEQEK	KLDVTEQEK	2	545.296
Human	P06733	1 - high confidence	AVEHIN[115]KTIAPALVSK	AVEHIDKTIAPALVSK	2	846.491
Human	P06733	1 - high confidence	GN[115]PTVEVDLFTSK	GDPTVEVDLFTSK	2	704.357
Human	P06733	1 - high confidence	LN[115]VTEQEK	LDVTEQEK	2	481.248
Human	P06734	1 - high confidence	MELQVSSGFVCN[115]TCPEK	MELQVSSGFVCDTCPEK	2	993.937
Human	P06744	2 - putative	SGTRVDHQTGPIVWGEPGTN[115]GQHAFYQLIHQGTK	SGTRVDHQTGPIVWGEPGTDGQHAFYQLIHQGTK	2	1859.41
Human	P06744	2 - putative	HFVALSTN[115]TTK	HFVALSTDTTK	2	610.323
Human	P06744	2 - putative	MFNGEKIN[115]YTEGR	MFNGEKIDYTEGR	2	780.365
Human	P06756	1 - high confidence	AGLEVYPSILN[115]QDNK	AGLEVYPSILDQDNK	2	831.426
Human	P06756	1 - high confidence	NQFTPAN[115]ISR	NQFTPADISR	2	574.791
Human	P06756	1 - high confidence	QFTPAN[115]ISR	QFTPADISR	2	517.77
Human	P06756	1 - high confidence	ISSLQTTEKN[115]DTVAGQGERDHLIT	ISSLQTTEKDDTVAGQGERDHLIT	2	1307.65
Human	P06756	1 - high confidence	ISSLQTTEKN[115]D	ISSLQTTEKDD	2	618.804
Human	P06756	1 - high confidence	YNN[115]NTLLY	YNDNTLLY	2	508.243
Human	P06756	1 - high confidence	ISSLQTTEKN[115]DTVAGQGERDHL	ISSLQTTEKDDTVAGQGERDHL	2	1200.59
Human	P06756	1 - high confidence	N[115]MSSLYN[115]FTGEQMAAY	DMSSLYDFTGEQMAAY	2	914.877
Human	P06756	1 - high confidence	N[115]MSSLYN[115]FTGEQM	DMSSLYDFTGEQM	2	762.308
Human	P06756	1 - high confidence	ARPVITVNAGLEVYPSILNQDN[115]K	ARPVITVNAGLEVYPSILNQDDK	2	1256.68
Human	P06756	1 - high confidence	YNNN[115]TLLYILH	YNNDTLLYILH	2	689.857
Human	P06756	1 - high confidence	YNN[115]N[115]TLLYILH	YNDDTLLYILH	2	690.349
Human	P06756	1 - high confidence	YNN[115]NTLLYILHY	YNDNTLLYILHY	2	771.388
Human	P06756	1 - high confidence	ISSLQTTEKN[115]DTVAGQGERD	ISSLQTTEKDDTVAGQGERD	2	1075.52
Human	P06756	1 - high confidence	YN[115]N[115]NTLLYILH	YDDNTLLYILH	2	690.349
Human	P06756	1 - high confidence	ISSLQTTEKN[115]DTVAGQGERDH	ISSLQTTEKDDTVAGQGERDH	2	1144.05
Human	P06756	1 - high confidence	QTTEKN[115]DTVAGQGER	QTTEKDDTVAGQGER	2	817.887
Human	P06756	1 - high confidence	ISSLQTTEKN[115]DTVAGQG	ISSLQTTEKDDTVAGQG	2	875.432
Human	P06756	1 - high confidence	IKISSLQTTEKN[115]DTVAGQGER	IKISSLQTTEKDDTVAGQGER	2	1138.59
Human	P06756	1 - high confidence	TTEKN[115]DTVAGQGER	TTEKDDTVAGQGER	2	753.858
Human	P06756	1 - high confidence	ILHYDIDGPMN[115]CTSDMEINPLR	ILHYDIDGPMDCTSDMEINPLR	2	1303.09
Human	P06756	1 - high confidence	NLPIEDITN[115]STLVTTN	NLPIEDITDSTLVTTN	2	873.447
Human	P06756	1 - high confidence	LQTTEKN[115]DTVAGQGER	LQTTEKDDTVAGQGER	2	874.429
Human	P06756	1 - high confidence	ISSLQTTEKN[115]DT	ISSLQTTEKDDT	2	669.328
Human	P06756	1 - high confidence	YN[115]NQLATR	YDNQLATR	2	490.746
Human	P06756	1 - high confidence	NQN[115]HSYSLK	NQDHSYSLK	2	546.262
Human	P06756	1 - high confidence	ISSLQTTEKN[115]DTVAGQGE	ISSLQTTEKDDTVAGQGE	2	939.953
Human	P06756	1 - high confidence	SPSHSKN[115]MTISR	SPSHSKDMTISR	2	673.333
Human	P06756	1 - high confidence	ISSLQTTEKN[115]DTVAGQ	ISSLQTTEKDDTVAGQ	2	846.921
Human	P06756	1 - high confidence	TAADTTGLQPILN[115]QFTPAN[115]ISR	TAADTTGLQPILDQFTPADISR	2	1166.1
Human	P06756	1 - high confidence	AGLEVYPSILNQDN[115]K	AGLEVYPSILNQDDK	2	831.426
Human	P06756	1 - high confidence	SLQTTEKN[115]DTVAGQGER	SLQTTEKDDTVAGQGER	2	917.946
Human	P06756	1 - high confidence	SSLQTTEKN[115]DTVAGQGER	SSLQTTEKDDTVAGQGER	2	961.462
Human	P06756	1 - high confidence	YNN[115]NTLLYILH	YNDNTLLYILH	2	689.857
Human	P06756	1 - high confidence	ENQN[115]HSYSLK	ENQDHSYSLK	2	610.784
Human	P06756	1 - high confidence	TAADTTGLQPILNQFTPAN[115]ISR	TAADTTGLQPILNQFTPADISR	2	1165.61
Human	P06756	1 - high confidence	AN[115]TTQPGIVEGGQVLK	ADTTQPGIVEGGQVLK	2	806.934
Human	P06756	1 - high confidence	ISSLQTTEKN[115]DTVAGQGER	ISSLQTTEKDDTVAGQGER	2	1018
Human	P06865	3 - unspecific	SAEGTFFIN[115]K	SAEGTFFIDK	2	557.777
Human	P07093	2 - putative	NVNFEDPASACDSIN[115]AWVKN[115]ETR	NVNFEDPASACDSIDAWVKDETR	2	1320.09
Human	P07093	2 - putative	NVNFEDPASACDSINAWVKN[115]ETR	NVNFEDPASACDSINAWVKDETR	2	1319.6
Human	P07093	2 - putative	N[115]ASEIEVPFVTR	DASEIEVPFVTR	2	681.852
Human	P07204	1 - high confidence	GFQWVTGDN[115]NTSYSR	GFQWVTGDDNTSYSR	2	866.885
Human	P07204	1 - high confidence	GFQWVTGDNN[115]TSYSR	GFQWVTGDNDTSYSR	2	866.885
Human	P07204	1 - high confidence	GFQWVTGDN[115]N[115]TSYSR	GFQWVTGDDDTSYSR	2	867.377
Human	P07339	3 - unspecific	ISVN[115]NVLPVFDNLMQQK	ISVDNVLPVFDNLMQQK	2	980.517
Human	P07339	3 - unspecific	GSLSYLN[115]VTR	GSLSYLDVTR	2	555.796
Human	P07437	2 - putative	FVEWIPN[115]NVK	FVEWIPDNVK	2	623.83
Human	P07437	2 - putative	N[115]SSYFVEWIPN[115]N[115]VK	DSSYFVEWIPDDVK	2	850.399
Human	P07437	2 - putative	NSSYFVEWIPNN[115]VK	NSSYFVEWIPNDVK	2	849.415
Human	P07437	2 - putative	IGN[115]STAIQELFK	IGDSTAIQELFK	2	661.357
Human	P07437	2 - putative	NSSYFVEWIPN[115]NVK	NSSYFVEWIPDNVK	2	849.415
Human	P07437	2 - putative	LAVN[115]MVPFPR	LAVDMVPFPR	2	572.816
Human	P07437	2 - putative	MAVTFIGN[115]STAIQELFK	MAVTFIGDSTAIQELFK	2	935.988
Human	P07437	2 - putative	VSDTVVEPYN[115]ATLSVH	VSDTVVEPYDATLSVH	2	866.428
Human	P07437	2 - putative	N[115]SSYFVEWIPNNVK	DSSYFVEWIPNNVK	2	849.415
Human	P07550	1 - high confidence	PN[115]GSHAPDHDVTQQR	PDGSHAPDHDVTQQR	2	830.38
Human	P07550	1 - high confidence	LLAPN[115]GSHAPDHDVTQQR	LLAPDGSHAPDHDVTQQR	2	978.983
Human	P07585	2 - putative	NSISAVDN[115]GSLANTPHLR	NSISAVDDGSLANTPHLR	2	933.972
Human	P07585	2 - putative	LHNNN[115]ISVVGSSDFCPPGHNTK	LHNNDISVVGSSDFCPPGHNTK	2	1198.06
Human	P07585	2 - putative	ISAVDN[115]GSLANTPHLR	ISAVDDGSLANTPHLR	2	833.434
Human	P07585	2 - putative	SAVDN[115]GSLANTPHLR	SAVDDGSLANTPHLR	2	776.892
Human	P07585	2 - putative	SISAVDN[115]GSLANTPHLR	SISAVDDGSLANTPHLR	2	876.95
Human	P07585	2 - putative	IADTN[115]ITSIPQGLPPSLTELHLDGNK	IADTDITSIPQGLPPSLTELHLDGNK	2	1373.22
Human	P07602	3 - unspecific	TN[115]STFVQALVEH	TDSTFVQALVEH	2	673.836
Human	P07602	3 - unspecific	DVVTAAGDMLKDN[115]ATEEEILVYLEK	DVVTAAGDMLKDDATEEEILVYLEK	2	1384.19
Human	P07602	3 - unspecific	TN[115]STFVQALVEHVK	TDSTFVQALVEHVK	2	787.418
Human	P07602	3 - unspecific	DN[115]ATEEEILVYLEK	DDATEEEILVYLEK	2	833.91
Human	P07686	3 - unspecific	TIN[115]ESTIIDSPR	TIDESTIIDSPR	2	673.847
Human	P07711	3 - unspecific	YSVAN[115]DTGFVDIPK	YSVADDTGFVDIPK	2	763.875
Human	P07737	2 - putative	TFVN[115]ITPAEVGVLVGKDR	TFVDITPAEVGVLVGKDR	2	958.531
Human	P07737	2 - putative	SSFYVN[115]GLTLGGQK	SSFYVDGLTLGGQK	2	736.378
Human	P07737	2 - putative	TGGAPTFN[115]VTVTK	TGGAPTFDVTVTK	2	647.341
Human	P07737	2 - putative	TFVN[115]ITPAEVGVLVGK	TFVDITPAEVGVLVGK	2	822.967
Human	P07737	2 - putative	STGGAPTFN[115]VTVTK	STGGAPTFDVTVTK	2	690.857
Human	P07900	3 - unspecific	ELISN[115]SSDALDK	ELISDSSDALDK	2	646.817
Human	P07900	3 - unspecific	YIDQEELN[115]K	YIDQEELDK	2	576.778
Human	P07942	2 - putative	LATGNVSGGVCDDCQHN[115]TMGR	LATGNVSGGVCDDCQHDTMGR	2	1125.47
Human	P07942	2 - putative	VN[115]ASTTEPNSTVEQSALMR	VDASTTEPNSTVEQSALMR	2	1018.49
Human	P07942	2 - putative	LATGN[115]VSGGVCDDCQHNTMGR	LATGDVSGGVCDDCQHNTMGR	2	1125.47
Human	P07942	2 - putative	MEMPSTPQQLQN[115]LTEDIR	MEMPSTPQQLQDLTEDIR	2	1066.51
Human	P07942	2 - putative	LSDTTSQSN[115]STAK	LSDTTSQSDSTAK	2	670.815
Human	P07942	2 - putative	VN[115]ASTTEPN[115]STVEQSALMR	VDASTTEPDSTVEQSALMR	2	1018.98
Human	P07949	1 - high confidence	VEHWPN[115]ETSVQAN[115]GSFVR	VEHWPDETSVQADGSFVR	2	1029.98
Human	P07996	3 - unspecific	VVN[115]GSSPAIR	VVDGSSPAIR	2	500.778
Human	P07996	3 - unspecific	LTLDN[115]NVVN[115]GSSPAIR	LTLDDNVVDGSSPAIR	2	836.434
Human	P07996	3 - unspecific	TLDNN[115]VVN[115]GSSPAIR	TLDNDVVDGSSPAIR	2	779.892
Human	P07996	3 - unspecific	GCSSSTSVLLTLDNNVVN[115]GSSPAIR	GCSSSTSVLLTLDNNVVDGSSPAIR	2	1275.13
Human	P07996	3 - unspecific	NNVVN[115]GSSPAIR	NNVVDGSSPAIR	2	614.821
Human	P07996	3 - unspecific	DNNVVN[115]GSSPAIR	DNNVVDGSSPAIR	2	672.334
Human	P07996	3 - unspecific	VVN[115]STTGPGEHL	VVDSTTGPGEHL	2	606.302
Human	P07996	3 - unspecific	NVVN[115]GSSPAIR	NVVDGSSPAIR	2	557.799
Human	P07996	3 - unspecific	LDN[115]NVVN[115]GSSPAIR	LDDNVVDGSSPAIR	2	729.368
Human	P07996	3 - unspecific	LTLDNNVVN[115]GSSPAIR	LTLDNNVVDGSSPAIR	2	835.942
Human	P07996	3 - unspecific	KVSCPIMPCSN[115]ATVPDGECCPR	KVSCPIMPCSDATVPDGECCPR	2	1268.54
Human	P07996	3 - unspecific	TLDNNVVN[115]GSSPAIR	TLDNNVVDGSSPAIR	2	779.4
Human	P07996	3 - unspecific	LDNNVVN[115]GSSPAIR	LDNNVVDGSSPAIR	2	728.876
Human	P07996	3 - unspecific	VSCPIMPCSN[115]ATVPDGECCPR	VSCPIMPCSDATVPDGECCPR	2	1204.5
Human	P07996	3 - unspecific	SN[115]ATVPDGECCPR	SDATVPDGECCPR	2	732.301
Human	P07996	3 - unspecific	VN[115]STTGPGEHLR	VDSTTGPGEHLR	2	634.818
Human	P07996	3 - unspecific	N[115]STTGPGEHLR	DSTTGPGEHLR	2	585.284
Human	P07996	3 - unspecific	VVN[115]STTGPGEHLR	VVDSTTGPGEHLR	2	684.352
Human	P08069	1 - high confidence	LEN[115]CTVIEGYLH	LEDCTVIEGYLH	2	724.843
Human	P08069	1 - high confidence	VMQVAN[115]TTMSSR	VMQVADTTMSSR	2	663.316
Human	P08069	1 - high confidence	LILGEEQLEGN[115]YSFY	LILGEEQLEGDYSFY	2	888.425
Human	P08069	1 - high confidence	MQVAN[115]TTMSSR	MQVADTTMSSR	2	613.782
Human	P08069	1 - high confidence	N[115]TTAADTYN[115]ITDPEELETEYPFFESR	DTTAADTYDITDPEELETEYPFFESR	2	1528.17
Human	P08069	1 - high confidence	SAPDN[115]DTACVACR	SAPDDDTACVACR	2	719.293
Human	P08069	1 - high confidence	ACTENN[115]ECCHPECLGSCSAPDN[115]DTACVACR	ACTENDECCHPECLGSCSAPDDDTACVACR	2	1759.14
Human	P08069	1 - high confidence	IQATSLSGN[115]GSWTDPVFFYVQAK	IQATSLSGDGSWTDPVFFYVQAK	2	1259.12
Human	P08069	1 - high confidence	PGN[115]YTAR	PGDYTAR	2	390.191
Human	P08069	1 - high confidence	WNPPSLPNGN[115]LSYYIVR	WNPPSLPNGDLSYYIVR	2	996.008
Human	P08069	1 - high confidence	WNPPSLPN[115]GN[115]LSYYIVR	WNPPSLPDGDLSYYIVR	2	996.5
Human	P08069	1 - high confidence	ACTENNECCHPECLGSCSAPDN[115]DTACVACR	ACTENNECCHPECLGSCSAPDDDTACVACR	2	1758.64
Human	P08069	1 - high confidence	LNPGN[115]YTAR	LNPGDYTAR	2	503.754
Human	P08069	1 - high confidence	SRN[115]TTAADTYN[115]ITDPEELETEYPFFESR	SRDTTAADTYDITDPEELETEYPFFESR	2	1649.73
Human	P08069	1 - high confidence	TN[115]ASVPSIPLDVLSASN[115]SSSQLIVK	TDASVPSIPLDVLSASDSSSQLIVK	2	1265.17
Human	P08069	1 - high confidence	DVMQVAN[115]TTMSSR	DVMQVADTTMSSR	2	720.83
Human	P08123	2 - putative	ASQN[115]ITYHCK	ASQDITYHCK	2	611.783
Human	P08123	2 - putative	LLANYASQN[115]ITYH	LLANYASQDITYH	2	754.876
Human	P08123	2 - putative	LLANYASQN[115]ITYHCK	LLANYASQDITYHCK	2	898.938
Human	P08174	1 - high confidence	SDIEEFCN[115]R	SDIEEFCDR	2	585.743
Human	P08174	1 - high confidence	GSQWSDIEEFCN[115]RSCEVPTR	GSQWSDIEEFCDRSCEVPTR	2	1229.53
Human	P08174	1 - high confidence	GSQWSDIEEFCN[115]R	GSQWSDIEEFCDR	2	814.839
Human	P08183	1 - high confidence	AGNLEDLMSN[115]ITN[115]R	AGNLEDLMSDITDR	2	775.365
Human	P08183	1 - high confidence	GNLEDLMSN[115]ITN[115]R	GNLEDLMSDITDR	2	739.846
Human	P08183	1 - high confidence	SDIN[115]DTGFFMNL	SDIDDTGFFMNL	2	687.801
Human	P08183	1 - high confidence	SDIN[115]DTGFFMNLEEDMTR	SDIDDTGFFMNLEEDMTR	2	1068.45
Human	P08195	1 - high confidence	VTQYLNATGN[115]R	VTQYLNATGDR	2	619.315
Human	P08195	1 - high confidence	SLVTQYLN[115]	SLVTQYLD	2	469.748
Human	P08195	1 - high confidence	QYLN[115]ATGNR	QYLDATGNR	2	519.257
Human	P08195	1 - high confidence	VTQYLN[115]ATGN[115]R	VTQYLDATGDR	2	619.807
Human	P08195	1 - high confidence	SLVTQYLN[115]ATGNRW	SLVTQYLDATGNRW	2	812.413
Human	P08195	1 - high confidence	SSFPDIPGAVSAN[115]MTVK	SSFPDIPGAVSADMTVK	2	861.427
Human	P08195	1 - high confidence	IPGAVSAN[115]MTVK	IPGAVSADMTVK	2	594.821
Human	P08195	1 - high confidence	YLN[115]ATGNR	YLDATGNR	2	455.228
Human	P08195	1 - high confidence	DASSFLAEWQN[115]ITKGFSEDR	DASSFLAEWQDITKGFSEDR	2	1151.54
Human	P08195	1 - high confidence	DIENLKDASSFLAEWQN[115]ITKGFSEDR	DIENLKDASSFLAEWQDITKGFSEDR	2	1507.73
Human	P08195	1 - high confidence	LLIAGTN[115]SSDLQQI	LLIAGTDSSDLQQI	2	737.396
Human	P08195	1 - high confidence	LLIAGTN[115]SSDLQQILSLLESN	LLIAGTDSSDLQQILSLLESN	2	1115.6
Human	P08195	1 - high confidence	MLWDESSFPDIPGAVSAN[115]MTVK	MLWDESSFPDIPGAVSADMTVK	2	1198.56
Human	P08195	1 - high confidence	VSAN[115]MTVK	VSADMTVK	2	425.724
Human	P08195	1 - high confidence	AGTN[115]SSDLQQILSLLESNK	AGTDSSDLQQILSLLESNK	2	1010.02
Human	P08195	1 - high confidence	PVMLWDESSFPDIPGAVSAN[115]MTVK	PVMLWDESSFPDIPGAVSADMTVK	2	1296.62
Human	P08195	1 - high confidence	LLIAGTN[115]SSDLQ	LLIAGTDSSDLQ	2	616.825
Human	P08195	1 - high confidence	ALPGQPMEAPVMLWDESSFPDIPGAVSAN[115]MTVK	ALPGQPMEAPVMLWDESSFPDIPGAVSADMTVK	2	1743.84
Human	P08195	1 - high confidence	DASSFLAEWQN[115]IT	DASSFLAEWQDIT	2	741.844
Human	P08195	1 - high confidence	TN[115]SSDLQQILSLLESNK	TDSSDLQQILSLLESNK	2	945.989
Human	P08195	1 - high confidence	VMLWDESSFPDIPGAVSAN[115]MTVK	VMLWDESSFPDIPGAVSADMTVK	2	1248.1
Human	P08195	1 - high confidence	SLVTQYLN[115]AT	SLVTQYLDAT	2	555.791
Human	P08195	1 - high confidence	LKDASSFLAEWQN[115]ITK	LKDASSFLAEWQDITK	2	926.481
Human	P08195	1 - high confidence	KDASSFLAEWQN[115]ITK	KDASSFLAEWQDITK	2	869.939
Human	P08195	1 - high confidence	RDIENLKDASSFLAEWQN[115]ITK	RDIENLKDASSFLAEWQDITK	2	1240.13
Human	P08195	1 - high confidence	GTN[115]SSDLQQILSLLESNK	GTDSSDLQQILSLLESNK	2	974.5
Human	P08195	1 - high confidence	LLIAGTN[115]SSDLQQILS	LLIAGTDSSDLQQILS	2	837.454
Human	P08195	1 - high confidence	PGAVSAN[115]MTVK	PGAVSADMTVK	2	538.279
Human	P08195	1 - high confidence	LIAGTN[115]SSDLQQILSLLESNK	LIAGTDSSDLQQILSLLESNK	2	1123.1
Human	P08195	1 - high confidence	SLVTQYLNATGN[115]RWCSWSLSQAR	SLVTQYLNATGDRWCSWSLSQAR	2	1350.16
Human	P08195	1 - high confidence	SFPDIPGAVSAN[115]MTVK	SFPDIPGAVSADMTVK	2	817.911
Human	P08195	1 - high confidence	AEWQN[115]ITK	AEWQDITK	2	495.751
Human	P08195	1 - high confidence	DIEN[115]LKDASSFLAEWQN[115]ITK	DIEDLKDASSFLAEWQDITK	2	1162.57
Human	P08195	1 - high confidence	DESSFPDIPGAVSAN[115]MTVK	DESSFPDIPGAVSADMTVK	2	983.462
Human	P08195	1 - high confidence	LWDESSFPDIPGAVSAN[115]MTVK	LWDESSFPDIPGAVSADMTVK	2	1133.04
Human	P08195	1 - high confidence	AN[115]MTVKGQSEDPGSLLSLFR	ADMTVKGQSEDPGSLLSLFR	2	1076.04
Human	P08195	1 - high confidence	SLVTQYLN[115]ATGNRWCSWSLSQAR	SLVTQYLDATGNRWCSWSLSQAR	2	1350.16
Human	P08195	1 - high confidence	GAVSAN[115]MTVK	GAVSADMTVK	2	489.753
Human	P08195	1 - high confidence	EAPVMLWDESSFPDIPGAVSAN[115]MTVK	EAPVMLWDESSFPDIPGAVSADMTVK	2	1396.66
Human	P08195	1 - high confidence	LLIAGTN[115]SSDLQQ	LLIAGTDSSDLQQ	2	680.854
Human	P08195	1 - high confidence	FLAEWQN[115]ITK	FLAEWQDITK	2	625.827
Human	P08195	1 - high confidence	LVTQYLN[115]ATGNR	LVTQYLDATGNR	2	675.857
Human	P08195	1 - high confidence	IAGTN[115]SSDLQQILSLLESNK	IAGTDSSDLQQILSLLESNK	2	1066.56
Human	P08195	1 - high confidence	SFLAEWQN[115]ITK	SFLAEWQDITK	2	669.343
Human	P08195	1 - high confidence	APVMLWDESSFPDIPGAVSAN[115]MTVK	APVMLWDESSFPDIPGAVSADMTVK	2	1332.14
Human	P08195	1 - high confidence	ASSFLAEWQN[115]ITK	ASSFLAEWQDITK	2	748.378
Human	P08195	1 - high confidence	SLVTQYLN[115]ATGN	SLVTQYLDATGN	2	641.323
Human	P08195	1 - high confidence	LLIAGTN[115]SSDLQQIL	LLIAGTDSSDLQQIL	2	793.938
Human	P08195	1 - high confidence	TQYLN[115]ATGNR	TQYLDATGNR	2	569.781
Human	P08195	1 - high confidence	DASSFLAEWQN[115]ITKG	DASSFLAEWQDITKG	2	834.402
Human	P08195	1 - high confidence	ESSFPDIPGAVSAN[115]MTVK	ESSFPDIPGAVSADMTVK	2	925.949
Human	P08195	1 - high confidence	WDESSFPDIPGAVSAN[115]MTVK	WDESSFPDIPGAVSADMTVK	2	1076.5
Human	P08195	1 - high confidence	LN[115]ATGNRWCSWSLSQAR	LDATGNRWCSWSLSQAR	2	1004.48
Human	P08195	1 - high confidence	VTQYLN[115]ATGNR	VTQYLDATGNR	2	619.315
Human	P08195	1 - high confidence	SSFLAEWQN[115]ITK	SSFLAEWQDITK	2	712.859
Human	P08195	1 - high confidence	SLVTQYLN[115]ATGN[115]R	SLVTQYLDATGDR	2	719.865
Human	P08195	1 - high confidence	DIENLKDASSFLAEWQN[115]ITK	DIENLKDASSFLAEWQDITK	2	1162.08
Human	P08195	1 - high confidence	LAEWQN[115]ITK	LAEWQDITK	2	552.293
Human	P08195	1 - high confidence	LLIAGTN[115]SSDLQQILSLLESNK	LLIAGTDSSDLQQILSLLESNK	2	1179.64
Human	P08195	1 - high confidence	DASSFLAEWQN[115]ITK	DASSFLAEWQDITK	2	805.891
Human	P08195	1 - high confidence	SLVTQYLN[115]ATGNR	SLVTQYLDATGNR	2	719.373
Human	P08236	3 - unspecific	VVAN[115]GTGTQGQLK	VVADGTGTQGQLK	2	637.344
Human	P08238	3 - unspecific	DN[115]STMGYMMAK	DDSTMGYMMAK	2	625.252
Human	P08238	3 - unspecific	GVVDSEDIPLN[115]LSR	GVVDSEDIPLDLSR	2	757.891
Human	P08238	3 - unspecific	ELISN[115]ASDALDK	ELISDASDALDK	2	638.82
Human	P08238	3 - unspecific	LISN[115]ASDALDK	LISDASDALDK	2	574.299
Human	P08238	3 - unspecific	YIDQEELN[115]K	YIDQEELDK	2	576.778
Human	P08246	3 - unspecific	VVLGAHN[115]LSR	VVLGAHDLSR	2	533.807
Human	P08473	1 - high confidence	VMELEKEIANATAKPEDRN[115]DPMLLYNK	VMELEKEIANATAKPEDRDDPMLLYNK	2	1567.28
Human	P08473	1 - high confidence	SCIN[115]ESAIDSRGGEPLLK	SCIDESAIDSRGGEPLLK	2	973.981
Human	P08473	1 - high confidence	EIANATAKPEDRN[115]DPMLLYNK	EIANATAKPEDRDDPMLLYNK	2	1202.6
Human	P08473	1 - high confidence	IAN[115]ATAKPEDR	IADATAKPEDR	2	593.81
Human	P08473	1 - high confidence	EIAN[115]ATAKPEDRNDPMLLYNK	EIADATAKPEDRNDPMLLYNK	2	1202.6
Human	P08473	1 - high confidence	VMELEKEIAN[115]ATAKPEDRNDPMLLYNK	VMELEKEIADATAKPEDRNDPMLLYNK	2	1567.28
Human	P08473	1 - high confidence	IN[115]ESAIDSR	IDESAIDSR	2	503.249
Human	P08473	1 - high confidence	N[115]ATAKPEDR	DATAKPEDR	2	501.749
Human	P08473	1 - high confidence	VMELEKEIAN[115]ATAKPEDR	VMELEKEIADATAKPEDR	2	1023.02
Human	P08473	1 - high confidence	AN[115]ATAKPEDR	ADATAKPEDR	2	537.268
Human	P08473	1 - high confidence	SCIN[115]ESAIDSR	SCIDESAIDSR	2	626.78
Human	P08473	1 - high confidence	EIAN[115]ATAKPEDR	EIADATAKPEDR	2	658.331
Human	P08514	1 - high confidence	LICNQKKEN[115]ETRVVLCELGNPMK	LICNQKKEDETRVVLCELGNPMK	2	1387.71
Human	P08571	1 - high confidence	ALNSLN[115]LSFAGLEQVPK	ALNSLDLSFAGLEQVPK	2	901.491
Human	P08571	1 - high confidence	SLN[115]LSFAGLEQVPK	SLDLSFAGLEQVPK	2	752.409
Human	P08571	1 - high confidence	APQPDELPEVDN[115]LTLDGNPF	APQPDELPEVDDLTLDGNPF	2	1091.52
Human	P08575	1 - high confidence	GN[115]TLVRN[115]ESHK	GDTLVRDESHK	2	628.818
Human	P08575	1 - high confidence	TQHIGNQEEN[115]K	TQHIGNQEEDK	2	649.805
Human	P08575	1 - high confidence	LEVEAGN[115]TLVRNESHK	LEVEAGDTLVRNESHK	2	898.964
Human	P08575	1 - high confidence	SISHN[115]SCTAPDK	SISHDSCTAPDK	2	659.294
Human	P08575	1 - high confidence	NENVECGNN[115]TCTNNEVHN[115]LTECK	NENVECGNDTCTNNEVHDLTECK	2	1376.55
Human	P08575	1 - high confidence	NENVECGN[115]NTCTNNEVHN[115]LTECK	NENVECGDNTCTNNEVHDLTECK	2	1376.55
Human	P08575	1 - high confidence	EVEAGNTLVRN[115]ESHK	EVEAGNTLVRDESHK	2	842.421
Human	P08575	1 - high confidence	GN[115]NTCTNNEVHN[115]LTECK	GDNTCTNNEVHDLTECK	2	1003.92
Human	P08575	1 - high confidence	APPSQVWN[115]MTVSMTSDNSMHVK	APPSQVWDMTVSMTSDNSMHVK	2	1224.56
Human	P08575	1 - high confidence	LNVNENVECGN[115]NTCTN[115]N[115]EVHNLTECK	LNVNENVECGDNTCTDDEVHNLTECK	2	1540.14
Human	P08575	1 - high confidence	EVHN[115]LTECKN[115]ASVSISHNSCTAPDK	EVHDLTECKDASVSISHNSCTAPDK	2	1400.63
Human	P08575	1 - high confidence	EVHNLTECKN[115]ASVSISHN[115]SCTAPDK	EVHNLTECKDASVSISHDSCTAPDK	2	1400.63
Human	P08575	1 - high confidence	VNENVECGN[115]NTCTNNEVHN[115]LTECK	VNENVECGDNTCTNNEVHDLTECK	2	1426.08
Human	P08575	1 - high confidence	KN[115]ASVSISHNSCTAPDK	KDASVSISHNSCTAPDK	2	908.931
Human	P08575	1 - high confidence	SAPPSQVWN[115]M	SAPPSQVWDM	2	559.256
Human	P08575	1 - high confidence	GNTLVRN[115]ESHK	GNTLVRDESHK	2	628.326
Human	P08575	1 - high confidence	TQN[115]ITYR	TQDITYR	2	448.73
Human	P08575	1 - high confidence	SFHN[115]FTLCYIKETEK	SFHDFTLCYIKETEK	2	959.459
Human	P08575	1 - high confidence	NIETFTCDTQN[115]ITY	NIETFTCDTQDITY	2	860.875
Human	P08575	1 - high confidence	LTECKN[115]ASVSISHNSCTAPDK	LTECKDASVSISHNSCTAPDK	2	1160.53
Human	P08575	1 - high confidence	VQRN[115]GSAAMCHFTTK	VQRDGSAAMCHFTTK	2	854.901
Human	P08575	1 - high confidence	SWRTQHIGNQEEN[115]KSK	SWRTQHIGNQEEDKSK	2	971.975
Human	P08575	1 - high confidence	TN[115]WSVEQLPAEPK	TDWSVEQLPAEPK	2	750.375
Human	P08575	1 - high confidence	TVYQYQYTN[115]WSVEQLPAEPK	TVYQYQYTDWSVEQLPAEPK	2	1223.09
Human	P08575	1 - high confidence	LNVNEN[115]VECGN[115]NTCTNNEVHN[115]LTECK	LNVNEDVECGDNTCTNNEVHDLTECK	2	1540.14
Human	P08575	1 - high confidence	LNVNEN[115]VECGNNTCTNN[115]EVHN[115]LTECK	LNVNEDVECGNNTCTNDEVHDLTECK	2	1540.14
Human	P08575	1 - high confidence	LNVNENVECGN[115]NTCTN[115]NEVHNLTECK	LNVNENVECGDNTCTDNEVHNLTECK	2	1539.65
Human	P08575	1 - high confidence	LNVNENVECGNNTCTN[115]N[115]EVHN[115]LTECK	LNVNENVECGNNTCTDDEVHDLTECK	2	1540.14
Human	P08575	1 - high confidence	YAN[115]ITVDYLY	YADITVDYLY	2	618.298
Human	P08575	1 - high confidence	SFHN[115]FTLCYIKETEKDCLNLDK	SFHDFTLCYIKETEKDCLNLDK	2	1388.65
Human	P08575	1 - high confidence	SAPPSQVWN[115]MTVSMTSDN	SAPPSQVWDMTVSMTSDN	2	976.925
Human	P08575	1 - high confidence	SAPPSQVWN[115]MTVSMTSDNSM	SAPPSQVWDMTVSMTSDNSM	2	1085.96
Human	P08575	1 - high confidence	WKNIETFTCDTQN[115]ITYR	WKNIETFTCDTQDITYR	2	1096.01
Human	P08575	1 - high confidence	LNVNENVECGN[115]NTCTNNEVHNLTECK	LNVNENVECGDNTCTNNEVHNLTECK	2	1539.16
Human	P08575	1 - high confidence	LNVNENVECGNN[115]TCTN[115]NEVHN[115]LTECK	LNVNENVECGNDTCTDNEVHDLTECK	2	1540.14
Human	P08575	1 - high confidence	LNVNENVECGNN[115]TCTN[115]NEVHNLTECK	LNVNENVECGNDTCTDNEVHNLTECK	2	1539.65
Human	P08575	1 - high confidence	LNVNENVECGNN[115]TCTNN[115]EVHN[115]LTECK	LNVNENVECGNDTCTNDEVHDLTECK	2	1540.14
Human	P08575	1 - high confidence	ETFTCDTQN[115]ITYR	ETFTCDTQDITYR	2	825.362
Human	P08575	1 - high confidence	LEVEAGNTLVRN[115]ESHK	LEVEAGNTLVRDESHK	2	898.963
Human	P08575	1 - high confidence	KNIETFTCDTQN[115]ITYR	KNIETFTCDTQDITYR	2	1002.97
Human	P08575	1 - high confidence	FTCDTQN[115]ITYR	FTCDTQDITYR	2	710.317
Human	P08575	1 - high confidence	LNVNENVECGN[115]NT	LNVNENVECGDNT	2	739.318
Human	P08575	1 - high confidence	LNVNENVECGN[115]N[115]TCTNNEVHN[115]LTECK	LNVNENVECGDDTCTNNEVHDLTECK	2	1540.14
Human	P08575	1 - high confidence	SVSISHN[115]SCTAPDK	SVSISHDSCTAPDK	2	752.344
Human	P08575	1 - high confidence	NEVHN[115]LTECKN[115]ASVSISHNSCTAPDK	NEVHDLTECKDASVSISHNSCTAPDK	2	1457.65
Human	P08575	1 - high confidence	TCTNNEVHN[115]LTECK	TCTNNEVHDLTECK	2	860.87
Human	P08575	1 - high confidence	TFTCDTQN[115]ITYR	TFTCDTQDITYR	2	760.841
Human	P08575	1 - high confidence	N[115]ASVSISHN[115]SC	DASVSISHDSC	2	589.246
Human	P08575	1 - high confidence	HN[115]FTLCYIK	HDFTLCYIK	2	598.795
Human	P08575	1 - high confidence	LNVNENVECGN[115]NTCTN[115]NEVHN[115]LTECK	LNVNENVECGDNTCTDNEVHDLTECK	2	1540.14
Human	P08575	1 - high confidence	LNVNENVECGNNTCTNNEVHN[115]LTECK	LNVNENVECGNNTCTNNEVHDLTECK	2	1539.16
Human	P08575	1 - high confidence	PPSQVWN[115]MTVSMTSDN[115]SMHVK	PPSQVWDMTVSMTSDDSMHVK	2	1189.53
Human	P08575	1 - high confidence	SFHN[115]FTLCYI	SFHDFTLCYI	2	651.798
Human	P08575	1 - high confidence	N[115]ASVSISHN	DASVSISHN	2	465.223
Human	P08575	1 - high confidence	SAPPSQVWNMTVSMTSDN[115]SMHVK	SAPPSQVWNMTVSMTSDDSMHVK	2	1268.07
Human	P08575	1 - high confidence	YAN[115]ITVDYLYNKETK	YADITVDYLYNKETK	2	918.46
Human	P08575	1 - high confidence	CDTQN[115]ITYR	CDTQDITYR	2	586.259
Human	P08575	1 - high confidence	N[115]GSAAMCHFTTK	DGSAAMCHFTTK	2	663.287
Human	P08575	1 - high confidence	YAN[115]ITVDYLYN[115]K	YADITVDYLYDK	2	739.859
Human	P08575	1 - high confidence	NASVSISHN[115]SCTAPDK	NASVSISHDSCTAPDK	2	844.884
Human	P08575	1 - high confidence	SAPPSQVWN[115]MTVSMTSDN[115]SMHVK	SAPPSQVWDMTVSMTSDDSMHVK	2	1268.56
Human	P08575	1 - high confidence	AN[115]ITVDYLYNK	ADITVDYLYNK	2	657.835
Human	P08575	1 - high confidence	N[115]ASVSISHNSC	DASVSISHNSC	2	588.754
Human	P08575	1 - high confidence	NEVHN[115]LTECK	NEVHDLTECK	2	622.785
Human	P08575	1 - high confidence	N[115]ITVDYLYNK	DITVDYLYNK	2	622.317
Human	P08575	1 - high confidence	YHLEVEAGN[115]TLVRN[115]ESHK	YHLEVEAGDTLVRDESHK	2	1049.52
Human	P08575	1 - high confidence	SAPPSQVWN[115]MTVSMT	SAPPSQVWDMTVSMT	2	818.874
Human	P08575	1 - high confidence	SAPPSQVWN[115]MTVS	SAPPSQVWDMTVS	2	702.83
Human	P08575	1 - high confidence	HLEVEAGNTLVRN[115]ESHK	HLEVEAGNTLVRDESHK	2	967.493
Human	P08575	1 - high confidence	LNVNENVECGN[115]NTCTNN[115]EVHN[115]LTECK	LNVNENVECGDNTCTNDEVHDLTECK	2	1540.14
Human	P08575	1 - high confidence	SAPPSQVWN[115]MTVSM	SAPPSQVWDMTVSM	2	768.35
Human	P08575	1 - high confidence	AGNTLVRN[115]ESHK	AGNTLVRDESHK	2	663.845
Human	P08575	1 - high confidence	LNVNENVECGNN[115]TCTNNEVHN[115]LTECK	LNVNENVECGNDTCTNNEVHDLTECK	2	1539.65
Human	P08575	1 - high confidence	SAPPSQVWN[115]MTV	SAPPSQVWDMTV	2	659.314
Human	P08575	1 - high confidence	LNVNENVECGNNTCTNN[115]EVHN[115]LTECK	LNVNENVECGNNTCTNDEVHDLTECK	2	1539.65
Human	P08575	1 - high confidence	YHLEVEAGN[115]TLVRNESHK	YHLEVEAGDTLVRNESHK	2	1049.02
Human	P08575	1 - high confidence	PPSQVWN[115]MTVSMTSDNSMHVK	PPSQVWDMTVSMTSDNSMHVK	2	1189.04
Human	P08575	1 - high confidence	N[115]IETFTCDTQN[115]ITYR	DIETFTCDTQDITYR	2	939.418
Human	P08575	1 - high confidence	LNVNENVECGNNTCTN[115]NEVHN[115]LTECK	LNVNENVECGNNTCTDNEVHDLTECK	2	1539.65
Human	P08575	1 - high confidence	IETFTCDTQN[115]ITYR	IETFTCDTQDITYR	2	881.904
Human	P08575	1 - high confidence	DTQN[115]ITYR	DTQDITYR	2	506.244
Human	P08575	1 - high confidence	SFHN[115]FTLCY	SFHDFTLCY	2	595.256
Human	P08575	1 - high confidence	N[115]ASVSISHN[115]SCTAPDK	DASVSISHDSCTAPDK	2	845.376
Human	P08575	1 - high confidence	SAPPSQVWN[115]MTVSMTSDNSMHVK	SAPPSQVWDMTVSMTSDNSMHVK	2	1268.07
Human	P08575	1 - high confidence	YHLEVEAGNTLVRN[115]ESHK	YHLEVEAGNTLVRDESHK	2	1049.02
Human	P08575	1 - high confidence	SFHN[115]FTLC	SFHDFTLC	2	513.724
Human	P08575	1 - high confidence	N[115]ASVSISHNSCTAPDK	DASVSISHNSCTAPDK	2	844.884
Human	P08575	1 - high confidence	TCDTQN[115]ITYR	TCDTQDITYR	2	636.783
Human	P08575	1 - high confidence	SFHN[115]FTLCYIK	SFHDFTLCYIK	2	715.845
Human	P08575	1 - high confidence	LNVNENVECGN[115]NTCTNNEVHN[115]LTECK	LNVNENVECGDNTCTNNEVHDLTECK	2	1539.65
Human	P08575	1 - high confidence	YAN[115]ITVDYLYNK	YADITVDYLYNK	2	739.367
Human	P08575	1 - high confidence	NIETFTCDTQN[115]ITYR	NIETFTCDTQDITYR	2	938.926
Human	P08581	1 - high confidence	YQLPN[115]FTAETPIQNVILHEHHIF	YQLPDFTAETPIQNVILHEHHIF	2	1381.7
Human	P08581	1 - high confidence	YQLPNFTAETPIQN[115]VILHEH	YQLPNFTAETPIQDVILHEH	2	1183.1
Human	P08581	1 - high confidence	HFN[115]MSIIISNGHGTTQY	HFDMSIIISNGHGTTQY	2	960.952
Human	P08581	1 - high confidence	YQLPN[115]FTAETPIQNVILH	YQLPDFTAETPIQNVILH	2	1050.05
Human	P08581	1 - high confidence	VGNTIN[115]SSYFPDHPLHSISVR	VGNTIDSSYFPDHPLHSISVR	2	1171.09
Human	P08581	1 - high confidence	FVGNTIN[115]SSYFPDHPLHSISVR	FVGNTIDSSYFPDHPLHSISVR	2	1244.62
Human	P08581	1 - high confidence	YQLPN[115]FTAETPIQNVILHEH	YQLPDFTAETPIQNVILHEH	2	1183.1
Human	P08581	1 - high confidence	CLQHFYGPNHEHCFN[115]R	CLQHFYGPNHEHCFDR	2	1058.95
Human	P08581	1 - high confidence	YQLPN[115]FTAETPIQNVILHEHH	YQLPDFTAETPIQNVILHEHH	2	1251.63
Human	P08581	1 - high confidence	TIN[115]SSYFPDHPLHSISVR	TIDSSYFPDHPLHSISVR	2	1036.02
Human	P08581	1 - high confidence	VLLGN[115]ESCTLTLSESTMNTLK	VLLGDESCTLTLSESTMNTLK	2	1156.57
Human	P08581	1 - high confidence	N[115]FTVACQHR	DFTVACQHR	2	567.264
Human	P08581	1 - high confidence	HVFPHN[115]HTADIQSEVH	HVFPHDHTADIQSEVH	2	934.94
Human	P08581	1 - high confidence	AN[115]LSGGVWK	ADLSGGVWK	2	466.748
Human	P08582	1 - high confidence	VSEFFN[115]ASCVPVNNPK	VSEFFDASCVPVNNPK	2	905.43
Human	P08582	1 - high confidence	SEFFN[115]ASCVPVNNPK	SEFFDASCVPVNNPK	2	855.896
Human	P08582	1 - high confidence	TAVSEFFN[115]ASCVPVNNPK	TAVSEFFDASCVPVNNPK	2	991.473
Human	P08582	1 - high confidence	WCATSDPEQHKCGN[115]MSEAFR	WCATSDPEQHKCGDMSEAFR	2	1206.5
Human	P08582	1 - high confidence	N[115]ASCVPVNNPK	DASCVPVNNPK	2	600.791
Human	P08582	1 - high confidence	FN[115]ASCVPVNNPK	FDASCVPVNNPK	2	674.325
Human	P08582	1 - high confidence	DCDVLTAVSEFFN[115]ASCVPVNNPK	DCDVLTAVSEFFDASCVPVNNPK	2	1292.59
Human	P08582	1 - high confidence	CGN[115]MSEAFR	CGDMSEAFR	2	536.716
Human	P08603	2 - putative	MDGASN[115]VTCINSR	MDGASDVTCINSR	2	713.312
Human	P08603	2 - putative	ISEEN[115]ETTCYMGK	ISEEDETTCYMGK	2	781.824
Human	P08603	2 - putative	IPCSQPPQIEHGTIN[115]SSR	IPCSQPPQIEHGTIDSSR	2	1011.49
Human	P08637	1 - high confidence	CQTN[115]LSTLSDPVQLEVH	CQTDLSTLSDPVQLEVH	2	971.468
Human	P08648	1 - high confidence	TILN[115]GSDIR	TILDGSDIR	2	495.27
Human	P08648	1 - high confidence	FAVN[115]QSR	FAVDQSR	2	411.712
Human	P08648	1 - high confidence	NALN[115]LTFH	NALDLTFH	2	465.741
Human	P08648	1 - high confidence	TCYLSTDN[115]FTR	TCYLSTDDFTR	2	689.804
Human	P08648	1 - high confidence	ILN[115]GSDIR	ILDGSDIR	2	444.746
Human	P08648	1 - high confidence	LSTDN[115]FTR	LSTDDFTR	2	477.733
Human	P08648	1 - high confidence	N[115]LTYGYVTILN[115]GSDIR	DLTYGYVTILDGSDIR	2	900.957
Human	P08648	1 - high confidence	SLSCDYFAVN[115]QSR	SLSCDYFAVDQSR	2	774.346
Human	P08648	1 - high confidence	SLYN[115]FSGEQM	SLYDFSGEQM	2	588.751
Human	P08648	1 - high confidence	VTGLNCTTNHPIN[115]PK	VTGLNCTTNHPIDPK	2	833.918
Human	P08648	1 - high confidence	VTGLN[115]CTTNHPINPKG	VTGLDCTTNHPINPKG	2	862.428
Human	P08648	1 - high confidence	NALN[115]LTFHAQN[115]VGEGGAYEAELR	NALDLTFHAQDVGEGGAYEAELR	2	1238.59
Human	P08648	1 - high confidence	VTGLN[115]CTTN[115]HPINPK	VTGLDCTTDHPINPK	2	834.41
Human	P08648	1 - high confidence	LN[115]CTTNHPINPK	LDCTTNHPINPK	2	705.349
Human	P08648	1 - high confidence	VTGLN[115]CTTNHPIN	VTGLDCTTNHPIN	2	721.344
Human	P08648	1 - high confidence	SLYN[115]FSGEQMASYFGY	SLYDFSGEQMASYFGY	2	932.893
Human	P08648	1 - high confidence	N[115]LNNSQSDVVSFR	DLNNSQSDVVSFR	2	740.858
Human	P08648	1 - high confidence	N[115]NSQSDVVSFR	DNSQSDVVSFR	2	627.294
Human	P08648	1 - high confidence	NLN[115]NSQSDVVSF	NLDNSQSDVVSF	2	662.807
Human	P08648	1 - high confidence	N[115]ALNLTFHAQNVGEGGAYEAELR	DALNLTFHAQNVGEGGAYEAELR	2	1238.1
Human	P08648	1 - high confidence	IYLRN[115]ESEFRDK	IYLRDESEFRDK	2	785.9
Human	P08648	1 - high confidence	LSPIHIALN[115]F	LSPIHIALDF	2	563.322
Human	P08648	1 - high confidence	SCDYFAVN[115]QSR	SCDYFAVDQSR	2	674.288
Human	P08648	1 - high confidence	N[115]LNN[115]SQSDVVSFR	DLNDSQSDVVSFR	2	741.35
Human	P08648	1 - high confidence	GYVTILN[115]GSDIR	GYVTILDGSDIR	2	654.846
Human	P08648	1 - high confidence	NALNLTFHAQN[115]VGEGGAYEAELR	NALNLTFHAQDVGEGGAYEAELR	2	1238.1
Human	P08648	1 - high confidence	VTGLNCTTN[115]HPINPK	VTGLNCTTDHPINPK	2	833.918
Human	P08648	1 - high confidence	PLSDPVGTCYLSTDN[115]FTR	PLSDPVGTCYLSTDDFTR	2	1022.47
Human	P08648	1 - high confidence	YVTILN[115]GSDIR	YVTILDGSDIR	2	626.336
Human	P08648	1 - high confidence	N[115]CTTNHPINPK	DCTTNHPINPK	2	648.807
Human	P08648	1 - high confidence	AN[115]TSQPGVLQGGAVYLCPWGASPTQCTPIEFDSK	ADTSQPGVLQGGAVYLCPWGASPTQCTPIEFDSK	2	1819.35
Human	P08648	1 - high confidence	GN[115]FSSLSCDYFAVN[115]QSR	GDFSSLSCDYFAVDQSR	2	977.421
Human	P08648	1 - high confidence	SDPVGTCYLSTDN[115]FTR	SDPVGTCYLSTDDFTR	2	917.405
Human	P08648	1 - high confidence	N[115]LN[115]N[115]SQSDVVSFR	DLDDSQSDVVSFR	2	741.842
Human	P08648	1 - high confidence	NALN[115]LTFHAQ	NALDLTFHAQ	2	565.288
Human	P08648	1 - high confidence	LSDPVGTCYLSTDN[115]FTR	LSDPVGTCYLSTDDFTR	2	973.947
Human	P08648	1 - high confidence	LN[115]NSQSDVVSFR	LDNSQSDVVSFR	2	683.837
Human	P08648	1 - high confidence	PVGTCYLSTDN[115]FTR	PVGTCYLSTDDFTR	2	816.375
Human	P08648	1 - high confidence	VTILN[115]GSDIR	VTILDGSDIR	2	544.804
Human	P08648	1 - high confidence	YLRN[115]ESEFR	YLRDESEFR	2	607.797
Human	P08648	1 - high confidence	GLN[115]CTTNHPINPK	GLDCTTNHPINPK	2	733.859
Human	P08648	1 - high confidence	HPGN[115]FSSLSCDYFAVN[115]QSR	HPGDFSSLSCDYFAVDQSR	2	1094.48
Human	P08648	1 - high confidence	NALN[115]LTFHAQNVGEGGAYEAELR	NALDLTFHAQNVGEGGAYEAELR	2	1238.1
Human	P08648	1 - high confidence	TGLN[115]CTTNHPINPK	TGLDCTTNHPINPK	2	784.383
Human	P08648	1 - high confidence	N[115]LN[115]NSQSDVVSFR	DLDNSQSDVVSFR	2	741.35
Human	P08648	1 - high confidence	NLNN[115]SQSDVVSFR	NLNDSQSDVVSFR	2	740.858
Human	P08648	1 - high confidence	IYLRN[115]ESEFR	IYLRDESEFR	2	664.339
Human	P08648	1 - high confidence	TEKEPLSDPVGTCYLSTDN[115]FTR	TEKEPLSDPVGTCYLSTDDFTR	2	1266.09
Human	P08648	1 - high confidence	EPLSDPVGTCYLSTDN[115]FTR	EPLSDPVGTCYLSTDDFTR	2	1086.99
Human	P08648	1 - high confidence	VTGLN[115]CTTNHPINPK	VTGLDCTTNHPINPK	2	833.918
Human	P08648	1 - high confidence	NLN[115]N[115]SQSDVVSFR	NLDDSQSDVVSFR	2	741.35
Human	P08648	1 - high confidence	GN[115]LTYGYVTILN[115]GSDIR	GDLTYGYVTILDGSDIR	2	929.468
Human	P08648	1 - high confidence	NLN[115]NSQSDVVSFR	NLDNSQSDVVSFR	2	740.858
Human	P08670	3 - unspecific	QDVDN[115]ASLAR	QDVDDASLAR	2	545.265
Human	P08670	3 - unspecific	ISLPLPN[115]FSSLNLR	ISLPLPDFSSLNLR	2	786.446
Human	P08670	3 - unspecific	LQDEIQN[115]MK	LQDEIQDMK	2	560.274
Human	P08670	3 - unspecific	GQVIN[115]ETSQHHDDLE	GQVIDETSQHHDDLE	2	861.885
Human	P08670	3 - unspecific	GTN[115]ESLER	GTDESLER	2	453.715
Human	P08670	3 - unspecific	VELQELN[115]DR	VELQELDDR	2	558.783
Human	P08670	3 - unspecific	DGQVIN[115]ETSQHHDDLE	DGQVIDETSQHHDDLE	2	919.398
Human	P08842	1 - high confidence	LAN[115]DTLIYFTSDQGAHVEEVSSK	LADDTLIYFTSDQGAHVEEVSSK	2	1263.11
Human	P08913	1 - high confidence	LQPDAGN[115]ASWN[115]GTEAPGGGAR	LQPDAGDASWDGTEAPGGGAR	2	1014.46
Human	P08962	1 - high confidence	N[115]HTASILDR	DHTASILDR	2	514.265
Human	P08962	1 - high confidence	CGAAN[115]YTDWEK	CGAADYTDWEK	2	658.27
Human	P08962	1 - high confidence	NRVPDSCCIN[115]VTVGC	NRVPDSCCIDVTVGC	2	876.382
Human	P08962	1 - high confidence	QQMENYPKN[115]NHTASILDR	QQMENYPKDNHTASILDR	2	1080.51
Human	P08962	1 - high confidence	NRVPDSCCIN[115]VTVGCGINFNEK	NRVPDSCCIDVTVGCGINFNEK	2	1277.58
Human	P08962	1 - high confidence	VPDSCCIN[115]VTVGCGINFNEK	VPDSCCIDVTVGCGINFNEK	2	1142.51
Human	P08962	1 - high confidence	GAAN[115]YTDWEK	GAADYTDWEK	2	578.254
Human	P08962	1 - high confidence	N[115]NHTASILDR	DNHTASILDR	2	571.286
Human	P08962	1 - high confidence	QQMENYPKNN[115]HTASILDR	QQMENYPKNDHTASILDR	2	1080.51
Human	P08962	1 - high confidence	CCGAAN[115]YTDWEK	CCGAADYTDWEK	2	738.285
Human	P08962	1 - high confidence	N[115]N[115]HTASILDR	DDHTASILDR	2	571.778
Human	P08962	1 - high confidence	NN[115]HTASILDR	NDHTASILDR	2	571.286
Human	P09110	3 - unspecific	KDGSTTAGN[115]SSQVSDGAAAILLAR	KDGSTTAGDSSQVSDGAAAILLAR	2	1146.08
Human	P09172	2 - putative	SLEAIN[115]GSGLQMGLQR	SLEAIDGSGLQMGLQR	2	837.931
Human	P09326	1 - high confidence	KEDN[115]STYIMR	KEDDSTYIMR	2	629.296
Human	P09326	1 - high confidence	MPHN[115]YSR	MPHDYSR	2	453.203
Human	P09326	1 - high confidence	VQKEDN[115]STY	VQKEDDSTY	2	542.746
Human	P09326	1 - high confidence	QNSVLETTLMPHN[115]YSR	QNSVLETTLMPHDYSR	2	945.957
Human	P09326	1 - high confidence	IPGESVN[115]YTWYGDK	IPGESVDYTWYGDK	2	815.378
Human	P09326	1 - high confidence	PGESVN[115]YTWYGDK	PGESVDYTWYGDK	2	758.836
Human	P09326	1 - high confidence	VQKEDN[115]STYIM	VQKEDDSTYIM	2	664.809
Human	P09326	1 - high confidence	GHLVHMTVVSGSN[115]VTLN[115]ISESLPENYK	GHLVHMTVVSGSDVTLDISESLPENYK	2	1464.23
Human	P09326	1 - high confidence	ESVN[115]YTWYGDK	ESVDYTWYGDK	2	681.799
Human	P09326	1 - high confidence	LQN[115]SVLETTLMPHN[115]YSR	LQDSVLETTLMPHDYSR	2	1002.99
Human	P09326	1 - high confidence	SGSNVTLN[115]ISESLPENYK	SGSNVTLDISESLPENYK	2	976.979
Human	P09326	1 - high confidence	SCVIPGESVN[115]YTWYGDK	SCVIPGESVDYTWYGDK	2	988.444
Human	P09326	1 - high confidence	DN[115]STYIMR	DDSTYIMR	2	500.727
Human	P09326	1 - high confidence	QKEDN[115]STYIMR	QKEDDSTYIMR	2	693.325
Human	P09326	1 - high confidence	TLN[115]ISESLPENYK	TLDISESLPENYK	2	754.881
Human	P09326	1 - high confidence	HLVHMTVVSGSN[115]VTLNISESLPENYK	HLVHMTVVSGSDVTLNISESLPENYK	2	1435.23
Human	P09326	1 - high confidence	SN[115]VTLN[115]ISESLPENYK	SDVTLDISESLPENYK	2	905.444
Human	P09326	1 - high confidence	GSN[115]VTLN[115]ISESLPENYK	GSDVTLDISESLPENYK	2	933.955
Human	P09326	1 - high confidence	MTVVSGSN[115]VTLN[115]ISESLPENYK	MTVVSGSDVTLDISESLPENYK	2	1192.58
Human	P09326	1 - high confidence	N[115]SVLETTLMPHN[115]YSR	DSVLETTLMPHDYSR	2	882.42
Human	P09326	1 - high confidence	LQNSVLETTLMPHN[115]YSR	LQNSVLETTLMPHDYSR	2	1002.5
Human	P09326	1 - high confidence	LN[115]ISESLPENYK	LDISESLPENYK	2	704.357
Human	P09326	1 - high confidence	LETTLMPHN[115]YSR	LETTLMPHDYSR	2	731.856
Human	P09326	1 - high confidence	TVVSGSN[115]VTLN[115]ISESLPENYK	TVVSGSDVTLDISESLPENYK	2	1127.06
Human	P09326	1 - high confidence	VSGSN[115]VTLN[115]ISESLPENYK	VSGSDVTLDISESLPENYK	2	1027.01
Human	P09326	1 - high confidence	ELQN[115]SVLETTLMPHN[115]YS	ELQDSVLETTLMPHDYS	2	989.462
Human	P09326	1 - high confidence	ETTLMPHN[115]YSR	ETTLMPHDYSR	2	675.314
Human	P09326	1 - high confidence	VVSGSN[115]VTLN[115]ISESLPENYK	VVSGSDVTLDISESLPENYK	2	1076.54
Human	P09326	1 - high confidence	TTLMPHN[115]YSR	TTLMPHDYSR	2	610.793
Human	P09326	1 - high confidence	HLVHMTVVSGSN[115]VTLN[115]ISESLPENYK	HLVHMTVVSGSDVTLDISESLPENYK	2	1435.72
Human	P09326	1 - high confidence	LMPHN[115]YSR	LMPHDYSR	2	509.745
Human	P09326	1 - high confidence	ELQNSVLETTLMPHN[115]YS	ELQNSVLETTLMPHDYS	2	988.97
Human	P09326	1 - high confidence	VIPGESVN[115]YTWYGDK	VIPGESVDYTWYGDK	2	864.912
Human	P09326	1 - high confidence	ELQN[115]SVLETTLMPHN[115]Y	ELQDSVLETTLMPHDY	2	945.946
Human	P09326	1 - high confidence	NSVLETTLMPHN[115]YSR	NSVLETTLMPHDYSR	2	881.928
Human	P09326	1 - high confidence	SGSN[115]VTLN[115]ISESLPENYK	SGSDVTLDISESLPENYK	2	977.471
Human	P09326	1 - high confidence	TLMPHN[115]YSR	TLMPHDYSR	2	560.269
Human	P09326	1 - high confidence	N[115]GTVCLSPPCTLAR	DGTVCLSPPCTLAR	2	773.874
Human	P09326	1 - high confidence	ELQNSVLETTLMPHN[115]Y	ELQNSVLETTLMPHDY	2	945.454
Human	P09326	1 - high confidence	SVLETTLMPHN[115]YSR	SVLETTLMPHDYSR	2	824.907
Human	P09326	1 - high confidence	LSCVIPGESVN[115]YTWYGDK	LSCVIPGESVDYTWYGDK	2	1044.99
Human	P09326	1 - high confidence	VQKEDN[115]STYIMR	VQKEDDSTYIMR	2	742.859
Human	P09326	1 - high confidence	EDN[115]STYIMR	EDDSTYIMR	2	565.248
Human	P09326	1 - high confidence	ELQN[115]SVLETTLMPHN[115]YSR	ELQDSVLETTLMPHDYSR	2	1067.51
Human	P09326	1 - high confidence	ELQNSVLETTLMPHN[115]YSR	ELQNSVLETTLMPHDYSR	2	1067.02
Human	P09564	1 - high confidence	VN[115]ITCSTSGGLR	VDITCSTSGGLR	2	633.314
Human	P09564	1 - high confidence	EVQQSPHCTTVPVGASVN[115]ITCSTSGGLR	EVQQSPHCTTVPVGASVDITCSTSGGLR	2	1472.2
Human	P09564	1 - high confidence	GSQDN[115]LTITMHR	GSQDDLTITMHR	2	687.331
Human	P09564	1 - high confidence	IDFSGSQDN[115]LTI	IDFSGSQDDLTI	2	655.812
Human	P09564	1 - high confidence	SVN[115]ITCSTSGGLR	SVDITCSTSGGLR	2	676.83
Human	P09564	1 - high confidence	GRIDFSGSQDN[115]LTITMHR	GRIDFSGSQDDLTITMHR	2	1025
Human	P09564	1 - high confidence	ASVN[115]ITCSTSGGLR	ASVDITCSTSGGLR	2	712.349
Human	P09564	1 - high confidence	AQEVQQSPHCTTVPVGASVN[115]ITCSTSGGLR	AQEVQQSPHCTTVPVGASVDITCSTSGGLR	2	1571.75
Human	P09564	1 - high confidence	FSGSQDN[115]LTITMHR	FSGSQDDLTITMHR	2	804.381
Human	P09564	1 - high confidence	IDFSGSQDN[115]LTITMH	IDFSGSQDDLTITMH	2	840.386
Human	P09564	1 - high confidence	DFSGSQDN[115]LTITMHR	DFSGSQDDLTITMHR	2	861.894
Human	P09564	1 - high confidence	SGSQDN[115]LTITMHR	SGSQDDLTITMHR	2	730.847
Human	P09564	1 - high confidence	IDFSGSQDN[115]LTITMHR	IDFSGSQDDLTITMHR	2	918.436
Human	P09603	1 - high confidence	NVFN[115]ETK	NVFDETK	2	426.712
Human	P09603	1 - high confidence	VKNVFN[115]ETKNLLDKDWNIFSK	VKNVFDETKNLLDKDWNIFSK	2	1277.17
Human	P09603	1 - high confidence	VKNVFN[115]ETK	VKNVFDETK	2	540.293
Human	P09619	1 - high confidence	LQVSSIN[115]VSVN	LQVSSIDVSVN	2	580.815
Human	P09619	1 - high confidence	SILHIPSAELEDSGTYTCNVTESVN[115]DHQDEK	SILHIPSAELEDSGTYTCNVTESVDDHQDEK	2	1745.29
Human	P09619	1 - high confidence	ELPPTLLGN[115]SSEEESQLETN[115]VTYWEE	ELPPTLLGDSSEEESQLETDVTYWEE	2	1498.68
Human	P09619	1 - high confidence	LQVSSIN[115]VSVN[115]AVQTVVR	LQVSSIDVSVDAVQTVVR	2	958.031
Human	P09619	1 - high confidence	SILHIPSAELEDSGTYTCN[115]VTESVNDHQDEK	SILHIPSAELEDSGTYTCDVTESVNDHQDEK	2	1745.29
Human	P09619	1 - high confidence	ELPPTLLGN[115]SSEEESQLETNVTYWEE	ELPPTLLGDSSEEESQLETNVTYWEE	2	1498.19
Human	P09619	1 - high confidence	AIN[115]ITVVESGYVR	AIDITVVESGYVR	2	711.388
Human	P09619	1 - high confidence	LQVSSIN[115]VSVNAVQTVVR	LQVSSIDVSVNAVQTVVR	2	957.539
Human	P09693	1 - high confidence	VYDYQEDGSVLLTCDAEAKN[115]ITWFK	VYDYQEDGSVLLTCDAEAKDITWFK	2	1483.69
Human	P09758	1 - high confidence	RPTAGAFN[115]HSDLDAELR	RPTAGAFDHSDLDAELR	2	935.959
Human	P09758	1 - high confidence	PTAGAFN[115]HSDLDAELR	PTAGAFDHSDLDAELR	2	857.908
Human	P09758	1 - high confidence	HRPTAGAFN[115]HSDLDAELRR	HRPTAGAFDHSDLDAELRR	2	1082.54
Human	P09758	1 - high confidence	HRPTAGAFN[115]HSDLDAELR	HRPTAGAFDHSDLDAELR	2	1004.49
Human	P0C0L4	2 - putative	GLN[115]VTLSSTGR	GLDVTLSSTGR	2	553.299
Human	P0C7U0	1 - high confidence	WLAAFTN[115]ATQTYDR	WLAAFTDATQTYDR	2	829.897
Human	P0C7U0	1 - high confidence	FGN[115]LTYLN[115]LTK	FGDLTYLDLTK	2	643.34
Human	P10253	3 - unspecific	ITN[115]ETGQPLIGK	ITDETGQPLIGK	2	636.349
Human	P10253	3 - unspecific	NN[115]TIVNELVR	NDTIVNELVR	2	586.82
Human	P10253	3 - unspecific	N[115]NTIVNELVR	DNTIVNELVR	2	586.82
Human	P10253	3 - unspecific	GVFITN[115]ETGQPLIGK	GVFITDETGQPLIGK	2	787.928
Human	P10253	3 - unspecific	LEN[115]LSSSEMGYTATLTR	LEDLSSSEMGYTATLTR	2	937.449
Human	P10314	1 - high confidence	YYN[115]QSEAGSHTIQMMYGCDVGPDGR	YYDQSEAGSHTIQMMYGCDVGPDGR	2	1419.09
Human	P10314	1 - high confidence	RYLEN[115]GKETLQR	RYLEDGKETLQR	2	754.4
Human	P10314	1 - high confidence	YYN[115]QSEAGSHT	YYDQSEAGSHT	2	629.258
Human	P10314	1 - high confidence	YLEN[115]GKETLQR	YLEDGKETLQR	2	676.349
Human	P10314	1 - high confidence	YYN[115]QSEAGSH	YYDQSEAGSH	2	578.734
Human	P10316	1 - high confidence	GYYN[115]QSEAGSHT	GYYDQSEAGSHT	2	657.768
Human	P10316	1 - high confidence	RGYYN[115]QSEAGSHTVQR	RGYYDQSEAGSHTVQR	2	927.433
Human	P10316	1 - high confidence	RYLEN[115]GKETLQR	RYLEDGKETLQR	2	754.4
Human	P10316	1 - high confidence	GYYN[115]QSEAGSHTVQ	GYYDQSEAGSHTVQ	2	771.332
Human	P10316	1 - high confidence	YLEN[115]GKETLQR	YLEDGKETLQR	2	676.349
Human	P10316	1 - high confidence	VDLGTLRGYYN[115]QSEAGSHTVQR	VDLGTLRGYYDQSEAGSHTVQR	2	1226.6
Human	P10316	1 - high confidence	N[115]QSEAGSHTVQR	DQSEAGSHTVQR	2	657.808
Human	P10316	1 - high confidence	YYN[115]QSEAGSHTVQR	YYDQSEAGSHTVQR	2	820.872
Human	P10316	1 - high confidence	GYYN[115]QSEAGSH	GYYDQSEAGSH	2	607.244
Human	P10316	1 - high confidence	YN[115]QSEAGSHTVQR	YDQSEAGSHTVQR	2	739.34
Human	P10316	1 - high confidence	GYYN[115]QSEAGSHTVQR	GYYDQSEAGSHTVQR	2	849.382
Human	P10319	1 - high confidence	YYN[115]QSEAGSHI	YYDQSEAGSHI	2	635.276
Human	P10319	1 - high confidence	YYN[115]QSEAGSHII	YYDQSEAGSHII	2	691.818
Human	P10319	1 - high confidence	RYLEN[115]GKETLQR	RYLEDGKETLQR	2	754.4
Human	P10319	1 - high confidence	N[115]QSEAGSHIIQR	DQSEAGSHIIQR	2	670.834
Human	P10319	1 - high confidence	YLEN[115]GKETLQR	YLEDGKETLQR	2	676.349
Human	P10319	1 - high confidence	YN[115]QSEAGSHIIQR	YDQSEAGSHIIQR	2	752.366
Human	P10319	1 - high confidence	YYN[115]QSEAGSH	YYDQSEAGSH	2	578.734
Human	P10319	1 - high confidence	YYN[115]QSEAGSHIIQR	YYDQSEAGSHIIQR	2	833.898
Human	P10321	1 - high confidence	GYYN[115]QSEDGSHTLQRMSGCDLGPDGR	GYYDQSEDGSHTLQRMSGCDLGPDGR	2	1451.11
Human	P10321	1 - high confidence	GYYN[115]QSEDGSHT	GYYDQSEDGSHT	2	679.763
Human	P10321	1 - high confidence	RYLEN[115]GKETLQR	RYLEDGKETLQR	2	754.4
Human	P10321	1 - high confidence	YLEN[115]GKETLQR	YLEDGKETLQR	2	676.349
Human	P10321	1 - high confidence	GYYN[115]QSEDGSH	GYYDQSEDGSH	2	629.239
Human	P10586	1 - high confidence	VEVEPLN[115]STAVH	VEVEPLDSTAVH	2	648.331
Human	P10586	1 - high confidence	VEVEPLN[115]STAVHVY	VEVEPLDSTAVHVY	2	779.396
Human	P10586	1 - high confidence	VEVEPLN[115]STAVHVYW	VEVEPLDSTAVHVYW	2	872.436
Human	P10586	1 - high confidence	KVEVEPLN[115]STAVHVYWK	KVEVEPLDSTAVHVYWK	2	1000.53
Human	P10586	1 - high confidence	DIN[115]SQQELQN[115]ITTDTR	DIDSQQELQDITTDTR	2	939.443
Human	P10586	1 - high confidence	VEVEPLN[115]STAVHVYWK	VEVEPLDSTAVHVYWK	2	936.484
Human	P10586	1 - high confidence	DINSQQELQN[115]ITTDTR	DINSQQELQDITTDTR	2	938.951
Human	P10619	3 - unspecific	MDPPCTN[115]TTAASTYLNNPYVR	MDPPCTDTTAASTYLNNPYVR	2	1194.04
Human	P10645	2 - putative	HSGFEDELSEVLEN[115]QSSQAELK	HSGFEDELSEVLEDQSSQAELK	2	1239.07
Human	P10646	2 - putative	YFYN[115]N[115]QTK	YFYDDQTK	2	540.241
Human	P10646	2 - putative	YFYNN[115]QTK	YFYNDQTK	2	539.749
Human	P10721	1 - high confidence	SLYGKEDN[115]DTLVR	SLYGKEDDDTLVR	2	755.876
Human	P10747	1 - high confidence	PPPYLDNEKSN[115]GTIIHVK	PPPYLDNEKSDGTIIHVK	2	1012.03
[truncated: 14,021 more rows]

## Sheet: Table B
Organisme	Protein	CSPA category	Modified Sequence	Deamidated Sequence	charge	m/z
Mouse	A2A699	1 - high confidence	ASVDVFGN[115]R	ASVDVFGDR	2	483.241
Mouse	A2A6M5	3 - unspecific	N[115]FSQVLFN[115]N[115]VEK	DFSQVLFDDVEK	2	721.349
Mouse	A2A863	1 - high confidence	HNIIPIFAVTN[115]YSYSYYEK	HNIIPIFAVTDYSYSYYEK	2	1162.07
Mouse	A2A863	1 - high confidence	TCN[115]CSTGSLSDTQPCLR	TCDCSTGSLSDTQPCLR	2	979.409
Mouse	A2A863	1 - high confidence	DEDDDCTYSYNVEGDGSPGPN[115]STVLVHK	DEDDDCTYSYNVEGDGSPGPDSTVLVHK	2	1536.14
Mouse	A2A8L5	1 - high confidence	VEVEPLN[115]STAVH	VEVEPLDSTAVH	2	648.331
Mouse	A2A8L5	1 - high confidence	GHITN[115]YTVVYR	GHITDYTVVYR	2	662.341
Mouse	A2A8L5	1 - high confidence	ITN[115]YTVVYR	ITDYTVVYR	2	565.301
Mouse	A2A8L5	1 - high confidence	DINSQLELQNVTN[115]DTHLTLLGLKPDTTYDIK	DINSQLELQNVTDDTHLTLLGLKPDTTYDIK	2	1757.4
Mouse	A2A8L5	1 - high confidence	DINSQLELQN[115]VTN[115]DTHLTLLGLKPDTTYDIK	DINSQLELQDVTDDTHLTLLGLKPDTTYDIK	2	1757.9
Mouse	A2A8L5	1 - high confidence	KVEVEPLN[115]STAVHVSWK	KVEVEPLDSTAVHVSWK	2	962.515
Mouse	A2A8L5	1 - high confidence	VEVEPLN[115]STAVHVSWK	VEVEPLDSTAVHVSWK	2	898.468
Mouse	A2A8L5	1 - high confidence	N[115]GHITN[115]YTVVYR	DGHITDYTVVYR	2	719.855
Mouse	A2A8L5	1 - high confidence	NGHITN[115]YTVVYR	NGHITDYTVVYR	2	719.363
Mouse	A2AFS3	1 - high confidence	MAVCTDN[115]VTDLR	MAVCTDDVTDLR	2	698.319
Mouse	A2AJN7	1 - high confidence	SPN[115]SSLHTALN[115]ASLLASP	SPDSSLHTALDASLLASP	2	891.452
Mouse	A2AJN7	1 - high confidence	SPN[115]SSLHTALN[115]AS	SPDSSLHTALDAS	2	650.807
Mouse	A2AJN7	1 - high confidence	SPN[115]SSLHTALN[115]ASL	SPDSSLHTALDASL	2	707.349
Mouse	A2AJQ3	1 - high confidence	GVYELTHNN[115]K	GVYELTHNDK	2	588.291
Mouse	A2ARA8	1 - high confidence	IADIIAN[115]YSFK	IADIIADYSFK	2	628.335
Mouse	A2ARI4	1 - high confidence	SAFHN[115]LSDLHSLVIR	SAFHDLSDLHSLVIR	2	855.455
Mouse	A2ARI4	1 - high confidence	GATDAAN[115]ATSTAESEE	GATDAADATSTAESEE	2	763.313
Mouse	A2ARI4	1 - high confidence	GATDAAN[115]ATSTAESEEHSQIIIH	GATDAADATSTAESEEHSQIIIH	2	1177.54
Mouse	A2ARV4	1 - high confidence	TVLISKN[115]VTKPR	TVLISKDVTKPR	2	678.917
Mouse	A2ARV4	1 - high confidence	IIMDN[115]ITAH	IIMDDITAH	2	514.761
Mouse	A2ARV4	1 - high confidence	YN[115]QSVSNPCK	YDQSVSNPCK	2	599.267
Mouse	A2ARV4	1 - high confidence	IKPN[115]GSN[115]FTNIVTY	IKPDGSDFTNIVTY	2	785.396
Mouse	A2ARV4	1 - high confidence	DCVDGSDEAGCVLN[115]CTSSQFK	DCVDGSDEAGCVLDCTSSQFK	2	1175.47
Mouse	A2ARV4	1 - high confidence	YVCDGDKDCVDGSDEAGCVLN[115]CTSSQFK	YVCDGDKDCVDGSDEAGCVLDCTSSQFK	2	1594.14
Mouse	A2ARV4	1 - high confidence	SYVCNGINNCHDN[115]DTSDEK	SYVCNGINNCHDDDTSDEK	2	1121.94
Mouse	A2ARV4	1 - high confidence	GGECFCPPGHIINSN[115]DSR	GGECFCPPGHIINSDDSR	2	1009.43
Mouse	A2ARV4	1 - high confidence	GATCVCPIGYQLAN[115]DTK	GATCVCPIGYQLADDTK	2	934.933
Mouse	A2ARV4	1 - high confidence	N[115]QSVVMYSVPQPLGIIAIHPSR	DQSVVMYSVPQPLGIIAIHPSR	2	1204.15
Mouse	A2ARV4	1 - high confidence	VVLVN[115]TTHKPFDIHVLHPYR	VVLVDTTHKPFDIHVLHPYR	2	1193.66
Mouse	A2ARV4	1 - high confidence	TWSAFQN[115]GTDK	TWSAFQDGTDK	2	628.286
Mouse	A2ARV4	1 - high confidence	IYYSDFSN[115]QTINSMAEDGSNR	IYYSDFSDQTINSMAEDGSNR	2	1207.02
Mouse	A2ARV4	1 - high confidence	VCDGVPDCPEGEDENN[115]ATSGR	VCDGVPDCPEGEDENDATSGR	2	1139.95
Mouse	A2ARV4	1 - high confidence	EDFLIYSLN[115]NSLR	EDFLIYSLDNSLR	2	792.902
Mouse	A2ARV4	1 - high confidence	DGN[115]CTSPQALCNAR	DGDCTSPQALCNAR	2	782.831
Mouse	A2ARV4	1 - high confidence	DSSDEAN[115]CTTLCSQK	DSSDEADCTTLCSQK	2	858.841
Mouse	A2ARV4	1 - high confidence	SCN[115]STTEFTCSNGR	SCDSTTEFTCSNGR	2	811.318
Mouse	A2ARV4	1 - high confidence	SCN[115]STTEFTCSN[115]GR	SCDSTTEFTCSDGR	2	811.81
Mouse	A2ARV4	1 - high confidence	SFLDCTN[115]R	SFLDCTDR	2	507.224
Mouse	A2ARV4	1 - high confidence	SN[115]DSFSAASIIFSN[115]GR	SDDSFSAASIIFSDGR	2	837.887
Mouse	A2ARV4	1 - high confidence	SN[115]DSFSAASIIFSNGR	SDDSFSAASIIFSNGR	2	837.395
Mouse	A2ASS6	3 - unspecific	KVGIDN[115]VVR	KVGIDDVVR	2	500.796
Mouse	A2AVA0	2 - putative	TGEQQDSAN[115]VTWQVPTAK	TGEQQDSADVTWQVPTAK	2	980.969
Mouse	A2AVZ9	1 - high confidence	LQSN[115]VTGPSDLK	LQSDVTGPSDLK	2	630.331
Mouse	A2AVZ9	1 - high confidence	LLQSN[115]VTGPSDLK	LLQSDVTGPSDLK	2	686.873
Mouse	A2AVZ9	1 - high confidence	AENYFSEPCEQDCLLQSN[115]VTGPSDLK	AENYFSEPCEQDCLLQSDVTGPSDLK	2	1501.66
Mouse	A6H584	2 - putative	IIELESSLN[115]K	IIELESSLDK	2	573.819
Mouse	A6H584	2 - putative	LEN[115]VTSSVDVK	LEDVTSSVDVK	2	596.312
Mouse	A6H584	2 - putative	SSAN[115]QSEFQQQIQK	SSADQSEFQQQIQK	2	812.387
Mouse	A6H584	2 - putative	SN[115]DSVLEPANR	SDDSVLEPANR	2	601.789
Mouse	A6H584	2 - putative	FLEN[115]VTSSVDVK	FLEDVTSSVDVK	2	669.846
Mouse	A8E0Y8	1 - high confidence	AN[115]YSDLK	ADYSDLK	2	406.198
Mouse	A8E0Y8	1 - high confidence	FSSVSAN[115]ASYLK	FSSVSADASYLK	2	637.82
Mouse	B0V2N1	1 - high confidence	VEAEALN[115]ATAIR	VEAEALDATAIR	2	629.839
Mouse	B0V2N1	1 - high confidence	KVEAEALN[115]ATAIR	KVEAEALDATAIR	2	693.886
Mouse	B2RPV6	2 - putative	HQSLN[115]ETLSK	HQSLDETLSK	2	579.296
Mouse	B2RPV6	2 - putative	TVN[115]MTTILIGR	TVDMTTILIGR	2	610.342
Mouse	O08530	1 - high confidence	HYN[115]YTGK	HYDYTGK	2	442.204
Mouse	O08532	1 - high confidence	ERN[115]ESEPGSQR	ERDESEPGSQR	2	645.292
Mouse	O08532	1 - high confidence	HLVN[115]ISLYAFN[115]K	HLVDISLYAFDK	2	710.88
Mouse	O08532	1 - high confidence	LDNDNYVFTAPYFN[115]K	LDNDNYVFTAPYFDK	2	911.423
Mouse	O08532	1 - high confidence	QLLNYN[115]VSR	QLLNYDVSR	2	554.296
Mouse	O08532	1 - high confidence	PNN[115]PSCNTDLINR	PNDPSCNTDLINR	2	758.349
Mouse	O08532	1 - high confidence	TPNN[115]PSCNTDLINR	TPNDPSCNTDLINR	2	808.873
Mouse	O08532	1 - high confidence	SGLLDCGN[115]CSR	SGLLDCGDCSR	2	620.261
Mouse	O08532	1 - high confidence	EYCNDLKPSDN[115]NTE	EYCNDLKPSDDNTE	2	850.344
Mouse	O08532	1 - high confidence	RSLDNDNYVFTAPYFN[115]K	RSLDNDNYVFTAPYFDK	2	1032.99
Mouse	O08532	1 - high confidence	DAVN[115]N[115]ITAK	DAVDDITAK	2	474.241
Mouse	O08532	1 - high confidence	SLDN[115]DNYVFTAPYFN[115]K	SLDDDNYVFTAPYFDK	2	955.431
Mouse	O08532	1 - high confidence	SLDNDN[115]YVFTAPYFN[115]K	SLDNDDYVFTAPYFDK	2	955.431
Mouse	O08532	1 - high confidence	DAVNN[115]ITAK	DAVNDITAK	2	473.749
Mouse	O08532	1 - high confidence	PERN[115]ESEPGSQR	PERDESEPGSQR	2	693.819
Mouse	O08532	1 - high confidence	SFSGLLDCGN[115]CSR	SFSGLLDCGDCSR	2	737.311
Mouse	O08532	1 - high confidence	SLDNDNYVFTAPYFN[115]K	SLDNDNYVFTAPYFDK	2	954.939
Mouse	O08532	1 - high confidence	DDLDPERN[115]ESEPGSQR	DDLDPERDESEPGSQR	2	922.901
Mouse	O08538	2 - putative	LTDVETQVLN[115]QTSR	LTDVETQVLDQTSR	2	802.913
Mouse	O08545	1 - high confidence	HAVYWN[115]SSNQHLR	HAVYWDSSNQHLR	2	806.887
Mouse	O08602	1 - high confidence	TMTSGDPGETAN[115]ATEVGE	TMTSGDPGETADATEVGE	2	884.368
Mouse	O08602	1 - high confidence	N[115]ATEVGECLTQPLK	DATEVGECLTQPLK	2	780.885
Mouse	O08602	1 - high confidence	PGETAN[115]ATEVGECLTQPLK	PGETADATEVGECLTQPLK	2	1008.49
Mouse	O08602	1 - high confidence	TMTSGDPGETAN[115]ATEVGECLTQPLK	TMTSGDPGETADATEVGECLTQPLK	2	1304.59
Mouse	O08603	1 - high confidence	SGDPGETAN[115]ATEVK	SGDPGETADATEVK	2	688.815
Mouse	O08603	1 - high confidence	TSGDPGETAN[115]ATEVK	TSGDPGETADATEVK	2	739.339
Mouse	O08603	1 - high confidence	PGETAN[115]ATEVK	PGETADATEVK	2	559.275
Mouse	O08603	1 - high confidence	PGETAN[115]ATEVKK	PGETADATEVKK	2	623.323
Mouse	O08603	1 - high confidence	TMTSGDPGETAN[115]ATEVKK	TMTSGDPGETADATEVKK	2	919.431
Mouse	O08603	1 - high confidence	TMTSGDPGETAN[115]ATEVK	TMTSGDPGETADATEVK	2	855.383
Mouse	O08604	1 - high confidence	TMTSGDPGETAN[115]ATEVGECLTQPVNDLCQK	TMTSGDPGETADATEVGECLTQPVNDLCQK	2	1612.71
Mouse	O08665	2 - putative	IIYGVEN[115]SSTFLECSPK	IIYGVEDSSTFLECSPK	2	972.97
Mouse	O08742	1 - high confidence	NN[115]LTHLPK	NDLTHLPK	2	469.262
Mouse	O08747	1 - high confidence	LSDTAN[115]YTCVAK	LSDTADYTCVAK	2	672.314
Mouse	O08795	3 - unspecific	YEQGTGCWQGPN[115]R	YEQGTGCWQGPDR	2	777.329
Mouse	O08842	1 - high confidence	N[115]AIQAFGN[115]GTDVNMSPK	DAIQAFGDGTDVNMSPK	2	883.41
Mouse	O08842	1 - high confidence	ANELCAAESN[115]CSSR	ANELCAAESDCSSR	2	785.32
Mouse	O08842	1 - high confidence	NAIQAFGN[115]GTDVN[115]MSPK	NAIQAFGDGTDVDMSPK	2	883.41
Mouse	O08842	1 - high confidence	NAIQAFGN[115]GTDVNMSPK	NAIQAFGDGTDVNMSPK	2	882.918
Mouse	O08852	1 - high confidence	KEEATN[115]QTVLIR	KEEATDQTVLIR	2	701.883
Mouse	O08912	2 - putative	N[115]VTLPEIF	DVTLPEIF	2	467.253
Mouse	O09009	2 - putative	MINTN[115]CSAVR	MINTDCSAVR	2	583.771
Mouse	O09010	2 - putative	LTGNVVLTN[115]CSSAH	LTGNVVLTDCSSAH	2	737.357
Mouse	O09010	2 - putative	LTGNVVLTN[115]CSSAHSR	LTGNVVLTDCSSAHSR	2	858.923
Mouse	O09047	1 - high confidence	DLFIMDN[115]R	DLFIMDDR	2	512.745
Mouse	O09047	1 - high confidence	KLSLPESN[115]STDN[115]STAQLTGHMNDR	KLSLPESDSTDDSTAQLTGHMNDR	2	1309.61
Mouse	O09047	1 - high confidence	LSLPESN[115]STDNSTAQLTGHMN[115]DR	LSLPESDSTDNSTAQLTGHMDDR	2	1245.56
Mouse	O09047	1 - high confidence	PESN[115]STDN[115]STAQLTGHMN[115]DR	PESDSTDDSTAQLTGHMDDR	2	1089.45
Mouse	O09047	1 - high confidence	PESN[115]STDN[115]STAQLTGHMNDR	PESDSTDDSTAQLTGHMNDR	2	1088.96
Mouse	O09047	1 - high confidence	LSLPESN[115]STDN[115]STAQ	LSLPESDSTDDSTAQ	2	783.347
Mouse	O09047	1 - high confidence	MESFDADTN[115]STDLHSR	MESFDADTDSTDLHSR	2	913.882
Mouse	O09047	1 - high confidence	LSLPESN[115]STDN[115]STAQLTGHMNDR	LSLPESDSTDDSTAQLTGHMNDR	2	1245.56
Mouse	O09047	1 - high confidence	LSLPESN[115]STDN[115]STAQLTGH	LSLPESDSTDDSTAQLTGH	2	987.453
Mouse	O09047	1 - high confidence	LSLPESNSTDN[115]STAQLTGHMN[115]DR	LSLPESNSTDDSTAQLTGHMDDR	2	1245.56
Mouse	O09047	1 - high confidence	LSLPESN[115]STDN[115]STAQLTGHMN[115]DR	LSLPESDSTDDSTAQLTGHMDDR	2	1246.05
Mouse	O09117	2 - putative	VGVN[115]KNQTVTATF	VGVDKNQTVTATF	2	690.365
Mouse	O09117	2 - putative	GVN[115]KN[115]QTVTATFGYPFR	GVDKDQTVTATFGYPFR	2	951.476
Mouse	O09117	2 - putative	GVNKN[115]QTVTATFGYPFR	GVNKDQTVTATFGYPFR	2	950.984
Mouse	O09117	2 - putative	KN[115]QTVTATFGYPFR	KDQTVTATFGYPFR	2	815.918
Mouse	O09117	2 - putative	HTPPN[115]VSVCDVNWEK	HTPPDVSVCDVNWEK	2	891.912
Mouse	O09117	2 - putative	LN[115]QASFHTPPN[115]VSVCDVNWEK	LDQASFHTPPDVSVCDVNWEK	2	1222.57
Mouse	O09117	2 - putative	VGVN[115]KN[115]QTVTATFGYPFR	VGVDKDQTVTATFGYPFR	2	1001.01
Mouse	O09117	2 - putative	VGVN[115]KNQTVTATFGYPFR	VGVDKNQTVTATFGYPFR	2	1000.52
Mouse	O09117	2 - putative	VGVNKN[115]QTVTATF	VGVNKDQTVTATF	2	690.365
Mouse	O09117	2 - putative	VGVNKN[115]QTVTATFGYPFR	VGVNKDQTVTATFGYPFR	2	1000.52
Mouse	O09117	2 - putative	LNQASFHTPPN[115]VSVCDVNWEK	LNQASFHTPPDVSVCDVNWEK	2	1222.07
Mouse	O09117	2 - putative	N[115]QTVTATFGYPFR	DQTVTATFGYPFR	2	751.87
Mouse	O09118	2 - putative	TCN[115]QTTGQCPCK	TCDQTTGQCPCK	2	728.29
Mouse	O09118	2 - putative	SCHLCN[115]SSDPKK	SCHLCDSSDPKK	2	717.314
Mouse	O09126	1 - high confidence	VNALN[115]ISEK	VNALDISEK	2	494.772
Mouse	O09126	1 - high confidence	N[115]SSHSPLR	DSSHSPLR	2	449.726
Mouse	O09126	1 - high confidence	HKPGIFN[115]YSALLMSEDK	HKPGIFDYSALLMSEDK	2	975.988
Mouse	O09126	1 - high confidence	HKPGIFN[115]YSALLMSEDKDTLYVGAR	HKPGIFDYSALLMSEDKDTLYVGAR	2	1413.71
Mouse	O09126	1 - high confidence	SSTSLYVCGTNAFQPTCDHLN[115]LTSFK	SSTSLYVCGTNAFQPTCDHLDLTSFK	2	1475.18
Mouse	O09126	1 - high confidence	EAVFAVN[115]ALN[115]ISEK	EAVFAVDALDISEK	2	753.891
Mouse	O09126	1 - high confidence	KDVN[115]YTQIVVDR	KDVDYTQIVVDR	2	725.883
Mouse	O09126	1 - high confidence	EAVFAVNALN[115]ISEK	EAVFAVNALDISEK	2	753.399
Mouse	O09126	1 - high confidence	DVN[115]YTQIVVDR	DVDYTQIVVDR	2	661.836
Mouse	O09126	1 - high confidence	AAN[115]YTSSLNLPDK	AADYTSSLNLPDK	2	697.847
Mouse	O09159	3 - unspecific	AN[115]LTWTVK	ADLTWTVK	2	467.259
Mouse	O09159	3 - unspecific	ELN[115]ISICPVSQTSER	ELDISICPVSQTSER	2	867.425
Mouse	O09167	3 - unspecific	VYN[115]VTQHAVGIIVNK	VYDVTQHAVGIIVNK	2	828.462
Mouse	O35114	2 - putative	DNYLN[115]FSK	DNYLDFSK	2	501.235
Mouse	O35114	2 - putative	MVLQN[115]GTK	MVLQDGTK	2	446.237
Mouse	O35114	2 - putative	LN[115]ESVLIDK	LDESVLIDK	2	516.288
Mouse	O35114	2 - putative	NKANIQFGEN[115]GTTISAVTNK	NKANIQFGEDGTTISAVTNK	2	1054.54
Mouse	O35114	2 - putative	YKVPAEILAN[115]TSE	YKVPAEILADTSE	2	718.372
Mouse	O35114	2 - putative	NQSVGDPN[115]VDLIR	NQSVGDPDVDLIR	2	714.363
Mouse	O35114	2 - putative	VPAEILAN[115]TSENAGFCIPEGN	VPAEILADTSENAGFCIPEGN	2	1102.52
Mouse	O35114	2 - putative	YLN[115]ESVLIDK	YLDESVLIDK	2	597.819
Mouse	O35114	2 - putative	TMVFPVMYLN[115]ESVLIDK	TMVFPVMYLDESVLIDK	2	1000.51
Mouse	O35114	2 - putative	AN[115]IQFGEN[115]GTTISAVTNK	ADIQFGEDGTTISAVTNK	2	933.961
Mouse	O35114	2 - putative	GEN[115]GTTISAVTNK	GEDGTTISAVTNK	2	646.823
Mouse	O35114	2 - putative	N[115]MVLQN[115]GTK	DMVLQDGTK	2	503.75
Mouse	O35114	2 - putative	YKVPAEILAN[115]TSENAGF	YKVPAEILADTSENAGF	2	912.957
Mouse	O35114	2 - putative	IQFGEN[115]GTTISAVTNK	IQFGEDGTTISAVTNK	2	840.929
Mouse	O35114	2 - putative	VPAEILAN[115]TSENAGF	VPAEILADTSENAGF	2	767.378
Mouse	O35114	2 - putative	N[115]QSVGDPNVDLIR	DQSVGDPNVDLIR	2	714.363
Mouse	O35114	2 - putative	NMVLQN[115]GTK	NMVLQDGTK	2	503.258
Mouse	O35114	2 - putative	ANIQFGEN[115]GTTISAVTNK	ANIQFGEDGTTISAVTNK	2	933.469
Mouse	O35118	1 - high confidence	VN[115]TTVALSCTCR	VDTTVALSCTCR	2	691.827
Mouse	O35129	3 - unspecific	VLPSIVNEVLKSVVAKFN[115]ASQLITQR	VLPSIVNEVLKSVVAKFDASQLITQR	2	1427.83
Mouse	O35129	3 - unspecific	FN[115]ASQLITQR	FDASQLITQR	2	589.815
Mouse	O35134	3 - unspecific	EN[115]DSSVAIDR	EDDSSVAIDR	2	553.755
Mouse	O35136	1 - high confidence	FAVLAN[115]NNLQILNIN[115]K	FAVLADNNLQILNIDK	2	900.999
Mouse	O35136	1 - high confidence	SSLEPN[115]TTYEIR	SSLEPDTTYEIR	2	705.844
Mouse	O35136	1 - high confidence	SLEPN[115]TTYEIR	SLEPDTTYEIR	2	662.328
Mouse	O35136	1 - high confidence	FAVLANN[115]NLQILNIN[115]K	FAVLANDNLQILNIDK	2	900.999
Mouse	O35136	1 - high confidence	YN[115]CTATNR	YDCTATNR	2	500.714
Mouse	O35136	1 - high confidence	VVLSSLEPN[115]TTYEIR	VVLSSLEPDTTYEIR	2	861.454
Mouse	O35136	1 - high confidence	SHGVQTMVVLSSLEPN[115]TTYEIR	SHGVQTMVVLSSLEPDTTYEIR	2	1231.62
Mouse	O35136	1 - high confidence	FAVLANNNLQILNIN[115]K	FAVLANNNLQILNIDK	2	900.507
Mouse	O35136	1 - high confidence	SFN[115]ATAER	SFDATAER	2	448.712
Mouse	O35161	1 - high confidence	FFPSEDLQEQIYLN[115]R	FFPSEDLQEQIYLDR	2	950.463
Mouse	O35161	1 - high confidence	IVDMAAFIANN[115]GTR	IVDMAAFIANDGTR	2	747.377
Mouse	O35161	1 - high confidence	N[115]ATQGN[115]STLFGNDVR	DATQGDSTLFGNDVR	2	798.371
Mouse	O35219	1 - high confidence	PYN[115]SSGLGGPSIK	PYDSSGLGGPSIK	2	639.325
Mouse	O35235	1 - high confidence	ISN[115]MTLSNGK	ISDMTLSNGK	2	533.269
Mouse	O35235	1 - high confidence	ISN[115]MTLSN[115]GK	ISDMTLSDGK	2	533.761
Mouse	O35316	1 - high confidence	RN[115]ESHWVSLS	RDESHWVSLS	2	608.294
Mouse	O35316	1 - high confidence	DLPWAHCN[115]HSWNTPQCME	DLPWAHCDHSWNTPQCME	2	1142.46
Mouse	O35316	1 - high confidence	N[115]FTSPVIEFWER	DFTSPVIEFWER	2	763.373
Mouse	O35316	1 - high confidence	AN[115]FTSPVIEFWER	ADFTSPVIEFWER	2	798.891
Mouse	O35316	1 - high confidence	RN[115]ESHWVSLSTAN[115]FTSPVIEFWER	RDESHWVSLSTADFTSPVIEFWER	2	1447.69
Mouse	O35316	1 - high confidence	TAN[115]FTSPVIEFWER	TADFTSPVIEFWER	2	849.415
Mouse	O35316	1 - high confidence	DLPWAHCN[115]HSWNTPQCMEDTLR	DLPWAHCDHSWNTPQCMEDTLR	2	1385.09
Mouse	O35316	1 - high confidence	STAN[115]FTSPVIEFWER	STADFTSPVIEFWER	2	892.931
Mouse	O35316	1 - high confidence	RN[115]ESHWVSL	RDESHWVSL	2	564.778
Mouse	O35375	1 - high confidence	TGSEDCSKN[115]FTSPN[115]GTIESPGFPEK	TGSEDCSKDFTSPDGTIESPGFPEK	2	1344.59
Mouse	O35375	1 - high confidence	N[115]FTSPN[115]GTIESPGFPEK	DFTSPDGTIESPGFPEK	2	912.423
Mouse	O35379	1 - high confidence	SLWTDDPPVVN[115]GTQANR	SLWTDDPPVVDGTQANR	2	935.953
Mouse	O35379	1 - high confidence	WTDDPPVVN[115]GTQANR	WTDDPPVVDGTQANR	2	835.895
Mouse	O35379	1 - high confidence	DPPVVN[115]GTQANR	DPPVVDGTQANR	2	634.818
Mouse	O35379	1 - high confidence	TDDPPVVN[115]GTQANR	TDDPPVVDGTQANR	2	742.855
Mouse	O35379	1 - high confidence	PPVVN[115]GTQANR	PPVVDGTQANR	2	577.305
Mouse	O35393	1 - high confidence	PSSN[115]ATSR	PSSDATSR	2	410.696
Mouse	O35393	1 - high confidence	SAEPGRDTIPGDPSSN[115]ATSR	SAEPGRDTIPGDPSSDATSR	2	1008.47
Mouse	O35393	1 - high confidence	DRGAAHSAEPGRDTIPGDPSSN[115]ATSR	DRGAAHSAEPGRDTIPGDPSSDATSR	2	1312.11
Mouse	O35393	1 - high confidence	PGDPSSN[115]ATSR	PGDPSSDATSR	2	545.247
Mouse	O35393	1 - high confidence	GAAHSAEPGRDTIPGDPSSN[115]ATSR	GAAHSAEPGRDTIPGDPSSDATSR	2	1176.55
Mouse	O35393	1 - high confidence	DTIPGDPSSN[115]ATSR	DTIPGDPSSDATSR	2	709.826
Mouse	O35405	2 - putative	AALHDN[115]HTHSDIQVK	AALHDDHTHSDIQVK	2	843.916
Mouse	O35405	2 - putative	ELGVVMYN[115]CSCLAR	ELGVVMYDCSCLAR	2	836.881
Mouse	O35409	1 - high confidence	NVGPGFAGN[115]FSTQK	NVGPGFAGDFSTQK	2	712.847
Mouse	O35409	1 - high confidence	VPYNVGPGFAGN[115]FSTQK	VPYNVGPGFAGDFSTQK	2	892.439
Mouse	O35454	2 - putative	LQVTSEDVN[115]STIK	LQVTSEDVDSTIK	2	717.873
Mouse	O35454	2 - putative	VTSEDVN[115]STIK	VTSEDVDSTIK	2	597.301
Mouse	O35516	1 - high confidence	GGQEPCVNEGTCVTYHN[115]GTGFCR	GGQEPCVNEGTCVTYHDGTGFCR	2	1301.03
Mouse	O35566	1 - high confidence	LQQEFHCCGSN[115]	LQQEFHCCGSD	2	690.772
Mouse	O35566	1 - high confidence	CCGSN[115]NSQDWQDSEWIR	CCGSDNSQDWQDSEWIR	2	1071.92
Mouse	O35566	1 - high confidence	LQQEFHCCGSN[115]N	LQQEFHCCGSDN	2	747.793
Mouse	O35566	1 - high confidence	GSNN[115]SQDWQDSEWIR	GSNDSQDWQDSEWIR	2	911.888
Mouse	O35566	1 - high confidence	LQQEFHCCGSN[115]N[115]SQDWQDSEWIR	LQQEFHCCGSDDSQDWQDSEWIR	2	1463.6
Mouse	O35566	1 - high confidence	FHCCGSN[115]NSQDWQDSEWIR	FHCCGSDNSQDWQDSEWIR	2	1213.98
Mouse	O35566	1 - high confidence	SNN[115]SQDWQDSEWIR	SNDSQDWQDSEWIR	2	883.377
Mouse	O35566	1 - high confidence	SN[115]NSQDWQDSEWIR	SDNSQDWQDSEWIR	2	883.377
Mouse	O35566	1 - high confidence	GSN[115]NSQDWQDSEWIR	GSDNSQDWQDSEWIR	2	911.888
Mouse	O35566	1 - high confidence	LQQEFHCCGSN[115]NSQDWQDSEWIR	LQQEFHCCGSDNSQDWQDSEWIR	2	1463.1
Mouse	O35566	1 - high confidence	LQQEFHCCGSNN[115]SQDWQDSEWIR	LQQEFHCCGSNDSQDWQDSEWIR	2	1463.1
Mouse	O35598	1 - high confidence	EGICN[115]GFTALCPAS	EGICDGFTALCPAS	2	749.324
Mouse	O35598	1 - high confidence	PN[115]FTDCNR	PDFTDCNR	2	512.714
Mouse	O35598	1 - high confidence	IN[115]TTSDEKD	IDTTSDEKD	2	512.23
Mouse	O35598	1 - high confidence	HTQVCIN[115]GQCAGSICEK	HTQVCIDGQCAGSICEK	2	981.93
Mouse	O35598	1 - high confidence	IN[115]TTSDEKDPTN	IDTTSDEKDPTN	2	668.302
Mouse	O35598	1 - high confidence	EGICNGFTALCPASDPKPN[115]FTDCN[115]R	EGICNGFTALCPASDPKPDFTDCDR	2	1422.11
Mouse	O35598	1 - high confidence	IN[115]TTSDEKDPTNPF	IDTTSDEKDPTNPF	2	790.363
Mouse	O35598	1 - high confidence	TALCPASDPKPNFTDCN[115]R	TALCPASDPKPNFTDCDR	2	1032.96
Mouse	O35598	1 - high confidence	PKPN[115]FTDCNR	PKPDFTDCNR	2	625.288
Mouse	O35598	1 - high confidence	N[115]ISQVLEK	DISQVLEK	2	466.261
Mouse	O35598	1 - high confidence	TALCPASDPKPN[115]FTDCNR	TALCPASDPKPDFTDCNR	2	1032.96
Mouse	O35598	1 - high confidence	IN[115]TTSDEK	IDTTSDEK	2	454.717
Mouse	O35598	1 - high confidence	EGICN[115]GFTALCPASDPKPN[115]FTDCNR	EGICDGFTALCPASDPKPDFTDCNR	2	1422.11
Mouse	O35598	1 - high confidence	N[115]TTSDEKDPTNPFR	DTTSDEKDPTNPFR	2	811.871
Mouse	O35598	1 - high confidence	EGICNGFTALCPASDPKPN[115]FTDCNR	EGICNGFTALCPASDPKPDFTDCNR	2	1421.62
Mouse	O35598	1 - high confidence	IN[115]TTSDEKDPTNPFR	IDTTSDEKDPTNPFR	2	868.413
Mouse	O35604	2 - putative	LYN[115]VTHQFCN[115]ASVMDPT	LYDVTHQFCDASVMDPT	2	999.935
Mouse	O35604	2 - putative	QSQFLN[115]VTATEDYFDPK	QSQFLDVTATEDYFDPK	2	1002.47
Mouse	O35604	2 - putative	VITFPVNNYYN[115]DTER	VITFPVNNYYDDTER	2	923.439
Mouse	O35604	2 - putative	VLEEGYN[115]YSSR	VLEEGYDYSSR	2	659.305
Mouse	O35604	2 - putative	GCN[115]ESVDEVTGPCSCQDCSIVCGPK	GCDESVDEVTGPCSCQDCSIVCGPK	2	1408.55
Mouse	O35604	2 - putative	TEQLIIQAPN[115]TSVH	TEQLIIQAPDTSVH	2	776.407
Mouse	O35604	2 - putative	LYN[115]VTHQFCN[115]ASVMDPTCVR	LYDVTHQFCDASVMDPTCVR	2	1207.54
Mouse	O35604	2 - putative	NPN[115]LTISFTAER	NPDLTISFTAER	2	682.349
Mouse	O35604	2 - putative	LIASN[115]ITETMR	LIASDITETMR	2	625.329
Mouse	O35607	1 - high confidence	IGDPQECHYEECVVTTTPPSIQN[115]GTYR	IGDPQECHYEECVVTTTPPSIQDGTYR	2	1576.7
Mouse	O35607	1 - high confidence	SHEN[115]GTILCSK	SHEDGTILCSK	2	623.793
Mouse	O35607	1 - high confidence	ISHEN[115]GTILCSK	ISHEDGTILCSK	2	680.335
Mouse	O35632	1 - high confidence	ATPNEGFFN[115]QNITTF	ATPNEGFFDQNITTF	2	851.394
Mouse	O35632	1 - high confidence	SANTFLHLN[115]ASSFR	SANTFLHLDASSFR	2	783.392
Mouse	O35632	1 - high confidence	ATPNEGFFNQN[115]ITTF	ATPNEGFFNQDITTF	2	851.394
Mouse	O35632	1 - high confidence	N[115]PSANTFLHLN[115]ASSFR	DPSANTFLHLDASSFR	2	889.432
Mouse	O35632	1 - high confidence	RN[115]PSANTFLHLN[115]ASSFR	RDPSANTFLHLDASSFR	2	967.482
Mouse	O35632	1 - high confidence	RNPSANTFLHLN[115]ASSFR	RNPSANTFLHLDASSFR	2	966.99
Mouse	O35632	1 - high confidence	NPSANTFLHLN[115]ASSFR	NPSANTFLHLDASSFR	2	888.94
Mouse	O35632	1 - high confidence	ATPNEGFFNQN[115]ITTFYYDR	ATPNEGFFNQDITTFYYDR	2	1150.02
Mouse	O35659	1 - high confidence	APLLATGLFCN[115]R	APLLATGLFCDR	2	667.353
Mouse	O35659	1 - high confidence	FLTEAPLLATGLFCN[115]R	FLTEAPLLATGLFCDR	2	912.475
Mouse	O35659	1 - high confidence	DN[115]SSLPWR	DDSSLPWR	2	488.233
Mouse	O35664	1 - high confidence	VNN[115]VTGN[115]FTFVLR	VNDVTGDFTFVLR	2	741.886
Mouse	O35696	2 - putative	HN[115]QTLSLR	HDQTLSLR	2	485.262
Mouse	O35696	2 - putative	AFEDLVN[115]ATWR	AFEDLVDATWR	2	661.825
Mouse	O35714	1 - high confidence	VQN[115]GSGN[115]NTR	VQDGSGDNTR	2	524.739
Mouse	O35714	1 - high confidence	LWTN[115]CSQFGFLTMFPGN[115]K	LWTDCSQFGFLTMFPGDK	2	1075.49
Mouse	O35714	1 - high confidence	VQN[115]GSGN[115]NTRCCSLYAPGK	VQDGSGDNTRCCSLYAPGK	2	1042.96
Mouse	O35874	1 - high confidence	TSATDYTVVTHN[115]TSSGN[115]VTK	TSATDYTVVTHDTSSGDVTK	2	1042.99
Mouse	O35874	1 - high confidence	TTSATDYTVVTHNTSSGN[115]VTK	TTSATDYTVVTHNTSSGDVTK	2	1093.02
Mouse	O35874	1 - high confidence	DYTVVTHN[115]TSSGN[115]VTK	DYTVVTHDTSSGDVTK	2	862.905
Mouse	O35874	1 - high confidence	NLFPSN[115]LVVAAFTTSATDYTVVTHN[115]TSSGN[115]VTK	NLFPSDLVVAAFTTSATDYTVVTHDTSSGDVTK	2	1730.35
Mouse	O35874	1 - high confidence	VTHN[115]TSSGN[115]VTK	VTHDTSSGDVTK	2	623.802
Mouse	O35874	1 - high confidence	YTVVTHN[115]TSSGN[115]VTK	YTVVTHDTSSGDVTK	2	805.392
Mouse	O35874	1 - high confidence	TDYTVVTHN[115]TSSGN[115]VTK	TDYTVVTHDTSSGDVTK	2	913.429
Mouse	O35874	1 - high confidence	NLFPSNLVVAAFTTSATDYTVVTHN[115]TSSGN[115]VTK	NLFPSNLVVAAFTTSATDYTVVTHDTSSGDVTK	2	1729.85
Mouse	O35874	1 - high confidence	TTSATDYTVVTHN[115]TSSGNVTK	TTSATDYTVVTHDTSSGNVTK	2	1093.02
Mouse	O35874	1 - high confidence	TVVTHN[115]TSSGN[115]VTK	TVVTHDTSSGDVTK	2	723.86
Mouse	O35874	1 - high confidence	ATDYTVVTHN[115]TSSGN[115]VTK	ATDYTVVTHDTSSGDVTK	2	948.948
Mouse	O35874	1 - high confidence	AFTTSATDYTVVTHN[115]TSSGN[115]VTK	AFTTSATDYTVVTHDTSSGDVTK	2	1202.56
Mouse	O35874	1 - high confidence	FTTSATDYTVVTHN[115]TSSGN[115]VTK	FTTSATDYTVVTHDTSSGDVTK	2	1167.05
Mouse	O35874	1 - high confidence	SATDYTVVTHN[115]TSSGN[115]VTK	SATDYTVVTHDTSSGDVTK	2	992.464
Mouse	O35874	1 - high confidence	TTSATDYTVVTHN[115]TSSGN[115]VTK	TTSATDYTVVTHDTSSGDVTK	2	1093.51
Mouse	O35887	3 - unspecific	N[115]ATYGYVLDDPDPDDGFNYK	DATYGYVLDDPDPDDGFNYK	2	1140.49
Mouse	O35975	1 - high confidence	N[115]STSYPAGFHDFHGTAL	DSTSYPAGFHDFHGTAL	2	911.908
Mouse	O54732	1 - high confidence	PGN[115]ISAAYER	PGDISAAYER	2	539.765
Mouse	O54732	1 - high confidence	GLPGN[115]ISAAYER	GLPGDISAAYER	2	624.818
Mouse	O54819	2 - putative	YLYN[115]NQTK	YLYDNQTK	2	522.756
Mouse	O54819	2 - putative	YLYNN[115]QTK	YLYNDQTK	2	522.756
Mouse	O54890	1 - high confidence	NAVN[115]CTYKNEDDCVVR	NAVDCTYKNEDDCVVR	2	979.426
Mouse	O54890	1 - high confidence	NAVNCTYKN[115]EDDCVVR	NAVNCTYKDEDDCVVR	2	979.426
Mouse	O54890	1 - high confidence	NAVN[115]CTYK	NAVDCTYK	2	485.722
Mouse	O54901	1 - high confidence	GTGTGIEN[115]STESHFHSN[115]GTTSVTSIL	GTGTGIEDSTESHFHSDGTTSVTSIL	2	1318.6
Mouse	O54901	1 - high confidence	GTGTGIEN[115]STESHF	GTGTGIEDSTESHF	2	719.313
Mouse	O54901	1 - high confidence	GTGTGIEN[115]STESH	GTGTGIEDSTESH	2	645.779
Mouse	O54901	1 - high confidence	GTGTGIEN[115]STESHFH	GTGTGIEDSTESHFH	2	787.843
Mouse	O54901	1 - high confidence	GTGTGIEN[115]STESHFHSN[115]GTTSVTSILR	GTGTGIEDSTESHFHSDGTTSVTSILR	2	1396.66
Mouse	O54904	2 - putative	KN[115]FTFGNIR	KDFTFGNIR	2	549.294
Mouse	O54905	2 - putative	SETN[115]HSSLR	SETDHSSLR	2	516.244
Mouse	O54965	2 - putative	NFEN[115]ASQTFEDLPAR	NFEDASQTFEDLPAR	2	870.4
Mouse	O54965	2 - putative	DN[115]SSGTFIVLIR	DDSSGTFIVLIR	2	661.854
Mouse	O54990	1 - high confidence	DMSQSIPIEDMLLQVSHYLN[115]NSNR	DMSQSIPIEDMLLQVSHYLDNSNR	2	1403.17
Mouse	O54990	1 - high confidence	SLQDAATQLN[115]TNLSSVR	SLQDAATQLDTNLSSVR	2	909.966
Mouse	O54990	1 - high confidence	LQN[115]MSSSLK	LQDMSSSLK	2	504.758
Mouse	O54990	1 - high confidence	SSLN[115]SSQLPSVDR	SSLDSSQLPSVDR	2	695.847
Mouse	O54990	1 - high confidence	GYTTIDEIPNTIQN[115]QTVDVIKDVK	GYTTIDEIPNTIQDQTVDVIKDVK	2	1353.2
Mouse	O54990	1 - high confidence	IPNTIQN[115]QTVDVIK	IPNTIQDQTVDVIK	2	792.439
Mouse	O54990	1 - high confidence	LSSLGSSLN[115]SSQLPSVDR	LSSLGSSLDSSQLPSVDR	2	924.474
Mouse	O54990	1 - high confidence	SLGSSLN[115]SSQLPSVDR	SLGSSLDSSQLPSVDR	2	824.416
Mouse	O54990	1 - high confidence	TIQN[115]QTVDVIK	TIQDQTVDVIK	2	630.349
Mouse	O54990	1 - high confidence	DAATQLNTN[115]LSSVR	DAATQLNTDLSSVR	2	745.879
Mouse	O54990	1 - high confidence	ICDSIRPSLSSLGSSLN[115]SSQLPSVDR	ICDSIRPSLSSLGSSLDSSQLPSVDR	2	1388.7
Mouse	O54990	1 - high confidence	SLN[115]SSQLPSVDR	SLDSSQLPSVDR	2	652.331
Mouse	O54990	1 - high confidence	SLQDAATQLN[115]TN[115]LSSVR	SLQDAATQLDTDLSSVR	2	910.458
Mouse	O54990	1 - high confidence	PSLSSLGSSLN[115]SSQLPSVDR	PSLSSLGSSLDSSQLPSVDR	2	1016.52
Mouse	O54990	1 - high confidence	RGYTTIDEIPNTIQN[115]QTVDVIK	RGYTTIDEIPNTIQDQTVDVIK	2	1260.16
Mouse	O54990	1 - high confidence	GYTTIDEIPNTIQN[115]QTVDVIK	GYTTIDEIPNTIQDQTVDVIK	2	1182.11
Mouse	O54990	1 - high confidence	SLQDAATQLNTN[115]LSSVR	SLQDAATQLNTDLSSVR	2	909.966
Mouse	O54990	1 - high confidence	DALQN[115]MSSSLK	DALQDMSSSLK	2	597.79
Mouse	O54991	1 - high confidence	PN[115]CTGHCTHPR	PDCTGHCTHPR	2	669.28
Mouse	O54991	1 - high confidence	PVTDGQPHSVN[115]ITR	PVTDGQPHSVDITR	2	761.389
Mouse	O54991	1 - high confidence	GHN[115]ATFFGNVN[115]DSAVVR	GHDATFFGNVDDSAVVR	2	903.927
Mouse	O54991	1 - high confidence	VELN[115]TSR	VELDTSR	2	410.217
Mouse	O54991	1 - high confidence	AN[115]ASEGTFPN[115]CTGHCTHPR	ADASEGTFPDCTGHCTHPR	2	1058.44
Mouse	O55017	1 - high confidence	ACFPN[115]STDTEPVGDFPCGK	ACFPDSTDTEPVGDFPCGK	2	1050.44
Mouse	O55026	1 - high confidence	WPADKEN[115]DTGIVGQH	WPADKEDDTGIVGQH	2	834.39
Mouse	O55026	1 - high confidence	LN[115]LTSPEATAK	LDLTSPEATAK	2	573.309
Mouse	O55026	1 - high confidence	TMGQRPQTFN[115]SSATVSLSGTSNAALCR	TMGQRPQTFDSSATVSLSGTSNAALCR	2	1422.18
Mouse	O55026	1 - high confidence	PADKEN[115]DTGIVGQHSSCDVR	PADKEDDTGIVGQHSSCDVR	2	1093.5
Mouse	O55026	1 - high confidence	EVYQSPCTMGQRPQTFN[115]SSATVSLSGTSNAALCR	EVYQSPCTMGQRPQTFDSSATVSLSGTSNAALCR	2	1853.85
Mouse	O55026	1 - high confidence	ADKEN[115]DTGIVGQHSSCDVR	ADKEDDTGIVGQHSSCDVR	2	1044.97
Mouse	O55026	1 - high confidence	QLEDATETTCN[115]QTWAELQAR	QLEDATETTCDQTWAELQAR	2	1183.53
Mouse	O55026	1 - high confidence	EN[115]DTGIVGQHSSCDVR	EDDTGIVGQHSSCDVR	2	887.89
Mouse	O55026	1 - high confidence	WPADKEN[115]DTGIVGQHSSCDVR	WPADKEDDTGIVGQHSSCDVR	2	1186.54
Mouse	O55026	1 - high confidence	LLN[115]LTSPEATAK	LLDLTSPEATAK	2	629.851
Mouse	O55111	1 - high confidence	NTGELN[115]ITSILDR	NTGELDITSILDR	2	723.878
Mouse	O55111	1 - high confidence	YVQN[115]GTYTAK	YVQDGTYTAK	2	573.28
Mouse	O55142	3 - unspecific	NN[115]TVTPGGKPNK	NDTVTPGGKPNK	2	614.323
Mouse	O55142	3 - unspecific	N[115]NTVTPGGKPNK	DNTVTPGGKPNK	2	614.323
Mouse	O55142	3 - unspecific	N[115]NTVTPGGKPN[115]K	DNTVTPGGKPDK	2	614.815
Mouse	O55192	1 - high confidence	LN[115]ASVLGDHTK	LDASVLGDHTK	2	578.307
Mouse	O55192	1 - high confidence	LLN[115]ASVLGDHTK	LLDASVLGDHTK	2	634.849
Mouse	O70174	1 - high confidence	WDPGDYEN[115]VTSIR	WDPGDYEDVTSIR	2	776.852
Mouse	O70174	1 - high confidence	PVAN[115]ISDVVLVR	PVADISDVVLVR	2	641.875
Mouse	O70255	1 - high confidence	GALEAVN[115]GTDVR	GALEAVDGTDVR	2	601.807
Mouse	O70255	1 - high confidence	LQFDDN[115]GTYTCQVK	LQFDDDGTYTCQVK	2	845.378
Mouse	O70255	1 - high confidence	TSGALEAVN[115]GTDVR	TSGALEAVDGTDVR	2	695.847
Mouse	O70255	1 - high confidence	VEIYTSGALEAVN[115]GTDVR	VEIYTSGALEAVDGTDVR	2	947.976
Mouse	O70258	1 - high confidence	LNAIN[115]ITSALDR	LNAIDITSALDR	2	651.36
Mouse	O70309	1 - high confidence	SN[115]LTVLREPE	SDLTVLREPE	2	579.807
Mouse	O70309	1 - high confidence	N[115]FTALIPGTTVEILHGDSK	DFTALIPGTTVEILHGDSK	2	1007.53
Mouse	O70309	1 - high confidence	VAYN[115]CTCGCSTGLEPNSAR	VAYDCTCGCSTGLEPNSAR	2	1059.44
Mouse	O70309	1 - high confidence	CSGN[115]GTYTCGLCECDPGYLGTR	CSGDGTYTCGLCECDPGYLGTR	2	1249.99
Mouse	O70309	1 - high confidence	SN[115]LTVLR	SDLTVLR	2	402.238
Mouse	O70309	1 - high confidence	DCVECLLLHQGKPDN[115]QTCHHQCK	DCVECLLLHQGKPDDQTCHHQCK	2	1439.63
Mouse	O70340	2 - putative	TN[115]VSNAGLPSDFR	TDVSNAGLPSDFR	2	689.837
Mouse	O70340	2 - putative	SLLHN[115]ETSAHR	SLLHDETSAHR	2	633.318
Mouse	O70394	1 - high confidence	LPPGN[115]LSTLLPGEFK	LPPGDLSTLLPGEFK	2	792.441
Mouse	O70401	1 - high confidence	YN[115]STGDYR	YDSTGDYR	2	488.707
Mouse	O70401	1 - high confidence	SNYEN[115]ALKEYN[115]STGDYR	SNYEDALKEYDSTGDYR	2	1013.44
Mouse	O70401	1 - high confidence	SNYENALKEYN[115]STGDYR	SNYENALKEYDSTGDYR	2	1012.95
Mouse	O70401	1 - high confidence	EYN[115]STGDYR	EYDSTGDYR	2	553.228
Mouse	O70423	1 - high confidence	LASN[115]HSNK	LASDHSNK	2	436.22
Mouse	O70423	1 - high confidence	YLYLASN[115]HSN	YLYLASDHSN	2	591.778
Mouse	O70423	1 - high confidence	YLYLASN[115]HSN[115]K	YLYLASDHSDK	2	656.317
Mouse	O70423	1 - high confidence	YLASN[115]HSNK	YLASDHSNK	2	517.752
Mouse	O70423	1 - high confidence	LYLASN[115]HSNK	LYLASDHSNK	2	574.294
Mouse	O70423	1 - high confidence	YLYLASN[115]HSNK	YLYLASDHSNK	2	655.825
Mouse	O70458	1 - high confidence	PGPN[115]ETFTK	PGPDETFTK	2	496.243
Mouse	O70458	1 - high confidence	NINFN[115]LTHR	NINFDLTHR	2	565.294
Mouse	O70458	1 - high confidence	LQYGEVIHEHN[115]VSVHMSAN	LQYGEVIHEHDVSVHMSAN	2	1083.01
Mouse	O70458	1 - high confidence	GPN[115]TTSTTITSDDFKPGVR	GPDTTSTTITSDDFKPGVR	2	997.99
Mouse	O70458	1 - high confidence	LSN[115]DSGHEEVK	LSDDSGHEEVK	2	608.281
Mouse	O70458	1 - high confidence	SN[115]DSGHEEVK	SDDSGHEEVK	2	551.739
Mouse	O70458	1 - high confidence	WN[115]WTSDIPLECVK	WDWTSDIPLECVK	2	824.89
Mouse	O70458	1 - high confidence	YTSAGPGPN[115]ETFTK	YTSAGPGPDETFTK	2	735.844
Mouse	O70458	1 - high confidence	LGPN[115]TTSTTITSDDFKPGVR	LGPDTTSTTITSDDFKPGVR	2	1054.53
Mouse	O70458	1 - high confidence	YGQNVYN[115]VSCK	YGQNVYDVSCK	2	666.801
Mouse	O70458	1 - high confidence	VHSHGN[115]N[115]YTLLCQVK	VHSHGDDYTLLCQVK	2	886.428
Mouse	O70458	1 - high confidence	N[115]LGPN[115]TTSTTITSDDFKPGVR	DLGPDTTSTTITSDDFKPGVR	2	1112.05
Mouse	O70458	1 - high confidence	VHSHGN[115]NYTLLCQVK	VHSHGDNYTLLCQVK	2	885.936
Mouse	O70458	1 - high confidence	SVNINFN[115]LTHR	SVNINFDLTHR	2	658.344
Mouse	O70458	1 - high confidence	VHSHGNN[115]YTLLCQVK	VHSHGNDYTLLCQVK	2	885.936
Mouse	O70458	1 - high confidence	VLSN[115]DSGHEEVK	VLSDDSGHEEVK	2	657.815
Mouse	O70458	1 - high confidence	FQN[115]YTLCESFSK	FQDYTLCESFSK	2	762.84
Mouse	O70458	1 - high confidence	VLEEPKN[115]VSCETR	VLEEPKDVSCETR	2	781.383
Mouse	O70458	1 - high confidence	YDIN[115]GSETK	YDIDGSETK	2	514.236
Mouse	O70458	1 - high confidence	NLGPN[115]TTSTTITSDDFK	NLGPDTTSTTITSDDFK	2	906.932
Mouse	O70458	1 - high confidence	NLGPN[115]TTSTTITSDDFKPGVR	NLGPDTTSTTITSDDFKPGVR	2	1111.55
Mouse	O70458	1 - high confidence	TSAGPGPN[115]ETFTK	TSAGPGPDETFTK	2	654.312
Mouse	O70472	1 - high confidence	VVNCQEFALSAN[115]ASR	VVNCQEFALSADASR	2	833.899
Mouse	O70472	1 - high confidence	EADN[115]HTAFIR	EADDHTAFIR	2	587.781
Mouse	O88186	1 - high confidence	QLLLAN[115]NSLR	QLLLADNSLR	2	571.833
Mouse	O88207	2 - putative	N[115]VTLILDCK	DVTLILDCK	2	538.789
Mouse	O88307	1 - high confidence	SVTTSLHN[115]K	SVTTSLHDK	2	494.262
Mouse	O88307	1 - high confidence	AIN[115]QTAVECIWTGPK	AIDQTAVECIWTGPK	2	844.922
Mouse	O88307	1 - high confidence	LGN[115]TTDNFFK	LGDTTDNFFK	2	579.28
Mouse	O88307	1 - high confidence	SRN[115]STVEYSLSK	SRDSTVEYSLSK	2	686.344
Mouse	O88307	1 - high confidence	LTIVN[115]SSVLDRPR	LTIVDSSVLDRPR	2	735.92
Mouse	O88307	1 - high confidence	SDEFN[115]CSSGMCIR	SDEFDCSSGMCIR	2	782.3
Mouse	O88307	1 - high confidence	N[115]STVEYSLSK	DSTVEYSLSK	2	564.778
Mouse	O88322	2 - putative	IPAN[115]FTAHITPYK	IPADFTAHITPYK	2	737.393
Mouse	O88322	2 - putative	TNIEGQVPFIPAN[115]FTAHITPYK	TNIEGQVPFIPADFTAHITPYK	2	1230.14
Mouse	O88322	2 - putative	TNIEGQVPFIPAN[115]FTAH	TNIEGQVPFIPADFTAH	2	928.966
Mouse	O88393	1 - high confidence	SSGN[115]FSLTAETEER	SSGDFSLTAETEER	2	764.845
Mouse	O88393	1 - high confidence	AGVVVFN[115]CSLR	AGVVVFDCSLR	2	611.819
Mouse	O88477	3 - unspecific	TVNELQN[115]LTAAEVVVPR	TVNELQDLTAAEVVVPR	2	927.505
Mouse	O88507	1 - high confidence	VN[115]GTDLAPDLLNGSQLILR	VDGTDLAPDLLNGSQLILR	2	1005.55
Mouse	O88507	1 - high confidence	VNGTDLAPDLLN[115]GSQLILR	VNGTDLAPDLLDGSQLILR	2	1005.55
Mouse	O88507	1 - high confidence	VN[115]GTDLAPDLLN[115]GSQL	VDGTDLAPDLLDGSQL	2	814.907
Mouse	O88507	1 - high confidence	GTDLAPDLLN[115]GSQLILR	GTDLAPDLLDGSQLILR	2	898.994
Mouse	O88507	1 - high confidence	TFN[115]VTVLHGSK	TFDVTVLHGSK	2	602.325
Mouse	O88507	1 - high confidence	VN[115]GTDLAPDLLN[115]GSQLILR	VDGTDLAPDLLDGSQLILR	2	1006.04
Mouse	O88627	1 - high confidence	LNTN[115]FTN[115]R	LNTDFTDR	2	491.238
Mouse	O88627	1 - high confidence	ELFQSTSLN[115]GTNMPSFSGPWQDN[115]VSSLR	ELFQSTSLDGTNMPSFSGPWQDDVSSLR	2	1551.21
Mouse	O88627	1 - high confidence	ELFQSTSLN[115]GTNMPSFSGPWQDNVSSLR	ELFQSTSLDGTNMPSFSGPWQDNVSSLR	2	1550.72
Mouse	O88627	1 - high confidence	ELFQSTSLN[115]GTNMPSF	ELFQSTSLDGTNMPSF	2	887.407
Mouse	O88627	1 - high confidence	GAETDCVSFLNTN[115]FTN[115]R	GAETDCVSFLNTDFTDR	2	974.426
Mouse	O88662	1 - high confidence	VCTN[115]STN[115]CTEINELTGPEA	VCTDSTDCTEINELTGPEA	2	1056.44
Mouse	O88662	1 - high confidence	VCTN[115]STN[115]CTEINE	VCTDSTDCTEINE	2	772.301
Mouse	O88662	1 - high confidence	VCTN[115]STN[115]CTEINELTGPEAF	VCTDSTDCTEINELTGPEAF	2	1129.98
Mouse	O88783	2 - putative	TWN[115]QSIALR	TWDQSIALR	2	545.291
Mouse	O88792	1 - high confidence	N[115]SSFTIDPK	DSSFTIDPK	2	505.248
Mouse	O88792	1 - high confidence	TRAFMN[115]SSFTIDPK	TRAFMDSSFTIDPK	2	808.396
Mouse	O88792	1 - high confidence	MN[115]SSFTIDPK	MDSSFTIDPK	2	570.769
Mouse	O88792	1 - high confidence	FMN[115]SSFTIDPK	FMDSSFTIDPK	2	644.303
Mouse	O88792	1 - high confidence	GSVYTAQSDVQVPEN[115]ESIK	GSVYTAQSDVQVPEDESIK	2	1026.5
Mouse	O88792	1 - high confidence	KGSVYTAQSDVQVPEN[115]ESIK	KGSVYTAQSDVQVPEDESIK	2	1090.54
Mouse	O88792	1 - high confidence	AFMN[115]SSFTIDPK	AFMDSSFTIDPK	2	679.821
Mouse	O88829	2 - putative	LNSAPVEGYSEHVGN[115]K	LNSAPVEGYSEHVGDK	2	851.411
Mouse	O88856	2 - putative	LGYDPYANPPNYGNPDPIVIN[115]NTHR	LGYDPYANPPNYGNPDPIVIDNTHR	2	1406.67
Mouse	O88998	3 - unspecific	VQN[115]MSQSIEVLDR	VQDMSQSIEVLDR	2	760.378
Mouse	O89001	1 - high confidence	DSVTGSGLENATISVAGIN[115]HN[115]ITTGR	DSVTGSGLENATISVAGIDHDITTGR	2	1293.64
Mouse	O89001	1 - high confidence	DSVTGSGLEN[115]ATISVAGIN[115]HNITTGR	DSVTGSGLEDATISVAGIDHNITTGR	2	1293.64
Mouse	O89001	1 - high confidence	DSVTGSGLEN[115]ATISVAGINHN[115]ITTGR	DSVTGSGLEDATISVAGINHDITTGR	2	1293.64
Mouse	O89001	1 - high confidence	DLDTDFTSN[115]ASQPETK	DLDTDFTSDASQPETK	2	885.392
Mouse	O89001	1 - high confidence	FANEYPN[115]ITR	FANEYPDITR	2	613.299
Mouse	O89023	3 - unspecific	LPPSSYFN[115]ASGR	LPPSSYFDASGR	2	648.818
Mouse	O89023	3 - unspecific	SSSHLPPSSYFN[115]ASGR	SSSHLPPSSYFDASGR	2	847.895
Mouse	O89026	1 - high confidence	NYLGEAVSHN[115]ASLEVAILR	NYLGEAVSHDASLEVAILR	2	1029.04
Mouse	O89026	1 - high confidence	VWCLGN[115]ETK	VWCLGDETK	2	554.264
Mouse	O89103	1 - high confidence	EKGN[115]CTYHDLPMR	EKGDCTYHDLPMR	2	811.362
Mouse	P00186	2 - putative	FLTN[115]N[115]NSAIDK	FLTDDNSAIDK	2	619.802
Mouse	P01590	1 - high confidence	DMQKPTQSMHQEN[115]LTGHCR	DMQKPTQSMHQEDLTGHCR	2	1150.01
Mouse	P01590	1 - high confidence	PTQSMHQEN[115]LTGHCR	PTQSMHQEDLTGHCR	2	898.897
Mouse	P01590	1 - high confidence	DPPEVPN[115]ATFK	DPPEVPDATFK	2	608.301
Mouse	P01590	1 - high confidence	EQQTTTDMQKPTQSMHQEN[115]LTGHCR	EQQTTTDMQKPTQSMHQEDLTGHCR	2	1494.16
Mouse	P01590	1 - high confidence	HQEN[115]LTGHCR	HQEDLTGHCR	2	626.781
Mouse	P01590	1 - high confidence	MQKPTQSMHQEN[115]LTGHCR	MQKPTQSMHQEDLTGHCR	2	1092.49
Mouse	P01590	1 - high confidence	N[115]GTILN[115]CECK	DGTILDCECK	2	605.761
Mouse	P01590	1 - high confidence	EQQTTTDMQKPTQSMHQEN[115]LTGHC	EQQTTTDMQKPTQSMHQEDLTGHC	2	1416.11
Mouse	P01590	1 - high confidence	ALSYKN[115]GTILNCECK	ALSYKDGTILNCECK	2	886.424
Mouse	P01590	1 - high confidence	EQQTTTDMQKPTQSMHQEN[115]LTGH	EQQTTTDMQKPTQSMHQEDLTGH	2	1336.09
Mouse	P01590	1 - high confidence	ELCLYDPPEVPN[115]ATFK	ELCLYDPPEVPDATFK	2	947.454
Mouse	P01590	1 - high confidence	PPEVPN[115]ATFK	PPEVPDATFK	2	550.788
Mouse	P01590	1 - high confidence	N[115]GTILNCECK	DGTILNCECK	2	605.269
Mouse	P01731	1 - high confidence	TWDEKLN[115]SSK	TWDEKLDSSK	2	604.796
Mouse	P01731	1 - high confidence	ITWDEKLN[115]SSK	ITWDEKLDSSK	2	661.338
Mouse	P01731	1 - high confidence	VN[115]STTTKPVLR	VDSTTTKPVLR	2	608.851
Mouse	P01831	1 - high confidence	LQVSGANPMSSN[115]K	LQVSGANPMSSDK	2	667.327
Mouse	P01831	1 - high confidence	LDCRHEN[115]NTKDNSIQHEF	LDCRHEDNTKDNSIQHEF	2	1129.5
Mouse	P01831	1 - high confidence	VSGANPMSSN[115]K	VSGANPMSSDK	2	546.756
Mouse	P01831	1 - high confidence	LAN[115]FTTK	LADFTTK	2	398.219
Mouse	P01831	1 - high confidence	TLAN[115]FTTK	TLADFTTK	2	448.743
Mouse	P01831	1 - high confidence	QVSGANPMSSN[115]K	QVSGANPMSSDK	2	610.785
Mouse	P01831	1 - high confidence	LTLAN[115]FTTK	LTLADFTTK	2	505.285
Mouse	P01831	1 - high confidence	HEN[115]N[115]TKDN[115]SIQHEF	HEDDTKDDSIQHEF	2	858.364
Mouse	P01831	1 - high confidence	HENN[115]TKDN[115]SIQHEFSLT	HENDTKDDSIQHEFSLT	2	1008.45
Mouse	P01831	1 - high confidence	HENN[115]TKDNSIQHEFSLTR	HENDTKDNSIQHEFSLTR	2	1086.01
Mouse	P01831	1 - high confidence	HENNTKDN[115]SIQHEF	HENNTKDDSIQHEF	2	857.38
Mouse	P01831	1 - high confidence	HENNTKDN[115]SIQHEFSLTR	HENNTKDDSIQHEFSLTR	2	1086.01
Mouse	P01831	1 - high confidence	LDCRHEN[115]N[115]TKDNSIQHEFSLTR	LDCRHEDDTKDNSIQHEFSLTR	2	1358.63
Mouse	P01831	1 - high confidence	LDCRHENNTKDN[115]SIQHEFSLTR	LDCRHENNTKDDSIQHEFSLTR	2	1358.13
Mouse	P01831	1 - high confidence	ELQVSGANPMSSN[115]K	ELQVSGANPMSSDK	2	731.849
Mouse	P01831	1 - high confidence	KVLTLAN[115]FTTK	KVLTLADFTTK	2	618.867
Mouse	P01831	1 - high confidence	HENN[115]TKDN[115]SIQHEFSLTR	HENDTKDDSIQHEFSLTR	2	1086.5
Mouse	P01831	1 - high confidence	LDCRHEN[115]NTKDNSIQHEFSLTR	LDCRHEDNTKDNSIQHEFSLTR	2	1358.13
Mouse	P01831	1 - high confidence	HEN[115]NTKDNSIQHEFSLT	HEDNTKDNSIQHEFSLT	2	1007.96
Mouse	P01831	1 - high confidence	HEN[115]N[115]TKDNSIQHEFSLTR	HEDDTKDNSIQHEFSLTR	2	1086.5
Mouse	P01831	1 - high confidence	HEN[115]NTKDN[115]SIQHEFSLTR	HEDNTKDDSIQHEFSLTR	2	1086.5
Mouse	P01831	1 - high confidence	HEN[115]NTKDNSIQHEFSLTR	HEDNTKDNSIQHEFSLTR	2	1086.01
Mouse	P01831	1 - high confidence	HEN[115]NTKDN[115]SIQHEF	HEDNTKDDSIQHEF	2	857.872
Mouse	P01831	1 - high confidence	HEN[115]NTKDNSIQHEF	HEDNTKDNSIQHEF	2	857.38
Mouse	P01831	1 - high confidence	DEGDYFCELQVSGANPMSSN[115]K	DEGDYFCELQVSGANPMSSDK	2	1174.99
Mouse	P01831	1 - high confidence	VLTLAN[115]FTTK	VLTLADFTTK	2	554.819
Mouse	P01849	1 - high confidence	KETN[115]ATYPSSDVPCDATLTEK	KETDATYPSSDVPCDATLTEK	2	1164.53
Mouse	P01849	1 - high confidence	ETN[115]ATYPSSDVPCDATLTEK	ETDATYPSSDVPCDATLTEK	2	1100.49
Mouse	P01851	1 - high confidence	TQN[115]ISAEAWGR	TQDISAEAWGR	2	617.3
Mouse	P01851	1 - high confidence	HGLSEEDKWPEGSPKPVTQN[115]ISAEAWGR	HGLSEEDKWPEGSPKPVTQDISAEAWGR	2	1553.75
Mouse	P01851	1 - high confidence	EVHSGVSTDPQAYKESN[115]YSY	EVHSGVSTDPQAYKESDYSY	2	1131.5
Mouse	P01851	1 - high confidence	ESN[115]YSYCLSSR	ESDYSYCLSSR	2	683.786
Mouse	P01851	1 - high confidence	PVTQN[115]ISAEAWGR	PVTQDISAEAWGR	2	715.36
Mouse	P01868	2 - putative	EEQFN[115]STFR	EEQFDSTFR	2	579.76
Mouse	P01872	2 - putative	IKIMESHPN[115]GTFSAK	IKIMESHPDGTFSAK	2	830.925
Mouse	P01872	2 - putative	NYQN[115]NTEVIQGIR	NYQDNTEVIQGIR	2	775.387
Mouse	P01872	2 - putative	TWNYQN[115]N[115]TEVIQGIR	TWNYQDDTEVIQGIR	2	919.442
Mouse	P01872	2 - putative	MESHPN[115]GTFSAK	MESHPDGTFSAK	2	653.793
Mouse	P01872	2 - putative	SFTWNYQN[115]NTEVIQGIR	SFTWNYQDNTEVIQGIR	2	1036
Mouse	P01872	2 - putative	ETLN[115]ISWASQSGEPLETK	ETLDISWASQSGEPLETK	2	995.987
Mouse	P01872	2 - putative	TWNYQN[115]NTEVIQGIR	TWNYQDNTEVIQGIR	2	918.95
Mouse	P01872	2 - putative	YQN[115]NTEVIQGIR	YQDNTEVIQGIR	2	718.365
Mouse	P01872	2 - putative	IMESHPN[115]GTFSAK	IMESHPDGTFSAK	2	710.335
Mouse	P01881	2 - putative	DIEGAMAPSN[115]LTVNIL	DIEGAMAPSDLTVNIL	2	829.922
Mouse	P01881	2 - putative	DIEGAMAPSN[115]LTVNILTT	DIEGAMAPSDLTVNILTT	2	930.97
Mouse	P01881	2 - putative	SELNLN[115]HTCTINKPK	SELNLDHTCTINKPK	2	885.449
Mouse	P01881	2 - putative	ASELNLN[115]HTCTINKPK	ASELNLDHTCTINKPK	2	920.968
Mouse	P01881	2 - putative	KDIEGAMAPSN[115]LTVNILTT	KDIEGAMAPSDLTVNILTT	2	995.017
Mouse	P01881	2 - putative	DIEGAMAPSN[115]LTVN	DIEGAMAPSDLTVN	2	716.838
Mouse	P01881	2 - putative	KDIEGAMAPSN[115]LTVNIL	KDIEGAMAPSDLTVNIL	2	893.969
Mouse	P01881	2 - putative	KDIEGAMAPSN[115]LTVN	KDIEGAMAPSDLTVN	2	780.885
Mouse	P01895	1 - high confidence	YLKN[115]GN[115]ATLL	YLKDGDATLL	2	554.801
Mouse	P01895	1 - high confidence	YYN[115]QSAGGSHTLQW	YYDQSAGGSHTLQW	2	806.858
Mouse	P01895	1 - high confidence	YYN[115]QSAGGSHTL	YYDQSAGGSHTL	2	649.789
Mouse	P01895	1 - high confidence	YYN[115]QSAGGSHTLQWMAGCDVESDGR	YYDQSAGGSHTLQWMAGCDVESDGR	2	1395.58
Mouse	P01895	1 - high confidence	YYN[115]QSAGGSHTI	YYDQSAGGSHTI	2	649.789
Mouse	P01895	1 - high confidence	YYN[115]QSAGGSHTIQ	YYDQSAGGSHTIQ	2	713.818
Mouse	P01895	1 - high confidence	YLKNGN[115]ATLLR	YLKNGDATLLR	2	632.359
Mouse	P01895	1 - high confidence	YYN[115]QSAGGSHTLQ	YYDQSAGGSHTLQ	2	713.818
Mouse	P01895	1 - high confidence	YYN[115]QSAGGSHTLQWM	YYDQSAGGSHTLQWM	2	872.378
Mouse	P01895	1 - high confidence	YYN[115]QSAGGSH	YYDQSAGGSH	2	542.723
Mouse	P01895	1 - high confidence	NGN[115]ATLLR	NGDATLLR	2	430.238
Mouse	P01895	1 - high confidence	YLKN[115]GN[115]ATLLR	YLKDGDATLLR	2	632.851
Mouse	P01895	1 - high confidence	N[115]GN[115]ATLLR	DGDATLLR	2	430.73
Mouse	P01897	1 - high confidence	YLKN[115]GN[115]ATLL	YLKDGDATLL	2	554.801
Mouse	P01897	1 - high confidence	TLLGYYN[115]QSAG	TLLGYYDQSAG	2	594.286
Mouse	P01897	1 - high confidence	TLLGYYN[115]QSAGG	TLLGYYDQSAGG	2	622.796
Mouse	P01897	1 - high confidence	TLLGYYN[115]QSAGGTHTL	TLLGYYDQSAGGTHTL	2	848.915
Mouse	P01897	1 - high confidence	YLKNGN[115]ATLLRTDSPK	YLKNGDATLLRTDSPK	2	896.487
Mouse	P01897	1 - high confidence	WASVVVPLGKEQN[115]YTCR	WASVVVPLGKEQDYTCR	2	1004.5
Mouse	P01897	1 - high confidence	N[115]GN[115]ATLLRTDSPK	DGDATLLRTDSPK	2	694.857
Mouse	P01897	1 - high confidence	NGN[115]ATLLRTDSPK	NGDATLLRTDSPK	2	694.365
Mouse	P01897	1 - high confidence	TLLGYYN[115]QS	TLLGYYDQS	2	530.256
Mouse	P01897	1 - high confidence	TLLGYYN[115]QSAGGTH	TLLGYYDQSAGGTH	2	741.85
Mouse	P01897	1 - high confidence	TLLGYYN[115]QSAGGTHTLQ	TLLGYYDQSAGGTHTLQ	2	912.945
Mouse	P01897	1 - high confidence	YLKN[115]GN[115]ATLLRTDSPK	YLKDGDATLLRTDSPK	2	896.979
Mouse	P01897	1 - high confidence	YLKNGN[115]ATLLR	YLKNGDATLLR	2	632.359
Mouse	P01897	1 - high confidence	EQN[115]YTCR	EQDYTCR	2	486.201
Mouse	P01897	1 - high confidence	NGN[115]ATLLR	NGDATLLR	2	430.238
Mouse	P01897	1 - high confidence	YLKN[115]GN[115]ATLLR	YLKDGDATLLR	2	632.851
Mouse	P01897	1 - high confidence	N[115]GN[115]ATLLR	DGDATLLR	2	430.73
Mouse	P01898	1 - high confidence	TLLGYYN[115]QSE	TLLGYYDQSE	2	594.778
Mouse	P01898	1 - high confidence	TLLGYYN[115]QS	TLLGYYDQS	2	530.256
Mouse	P01899	1 - high confidence	YLKN[115]GN[115]ATLL	YLKDGDATLL	2	554.801
Mouse	P01899	1 - high confidence	YLKNGN[115]ATLL	YLKNGDATLL	2	554.309
Mouse	P01899	1 - high confidence	NLLGYYN[115]QSAGGSHTL	NLLGYYDQSAGGSHTL	2	848.405
Mouse	P01899	1 - high confidence	WASVVVPLGKEQN[115]YTCR	WASVVVPLGKEQDYTCR	2	1004.5
Mouse	P01899	1 - high confidence	NGN[115]ATLLRTDSPK	NGDATLLRTDSPK	2	694.365
Mouse	P01899	1 - high confidence	NLLGYYN[115]QSAGGSHTLQQMSG	NLLGYYDQSAGGSHTLQQMSG	2	1114.01
Mouse	P01899	1 - high confidence	N[115]GN[115]ATLLRTDSPK	DGDATLLRTDSPK	2	694.857
Mouse	P01899	1 - high confidence	YLKNGN[115]ATLLRTDSPK	YLKNGDATLLRTDSPK	2	896.487
Mouse	P01899	1 - high confidence	YLKN[115]GN[115]ATLLRTDSPK	YLKDGDATLLRTDSPK	2	896.979
Mouse	P01899	1 - high confidence	NLLGYYN[115]QSAGGSHTLQ	NLLGYYDQSAGGSHTLQ	2	912.435
Mouse	P01899	1 - high confidence	NLLGYYN[115]QSAGGSHTLQQMSGCDLGSDWR	NLLGYYDQSAGGSHTLQQMSGCDLGSDWR	2	1608.71
Mouse	P01899	1 - high confidence	NLLGYYN[115]QSAGGSHTLQQ	NLLGYYDQSAGGSHTLQQ	2	976.464
Mouse	P01899	1 - high confidence	YLKNGN[115]ATLLR	YLKNGDATLLR	2	632.359
Mouse	P01899	1 - high confidence	NLLGYYN[115]QSAGGSHTLQQM	NLLGYYDQSAGGSHTLQQM	2	1041.98
Mouse	P01899	1 - high confidence	NLLGYYN[115]QSAGGSH	NLLGYYDQSAGGSH	2	741.339
Mouse	P01899	1 - high confidence	EQN[115]YTCR	EQDYTCR	2	486.201
Mouse	P01899	1 - high confidence	YLKN[115]GN[115]ATLLR	YLKDGDATLLR	2	632.851
Mouse	P01899	1 - high confidence	N[115]GN[115]ATLLR	DGDATLLR	2	430.73
Mouse	P01899	1 - high confidence	NGN[115]ATLLR	NGDATLLR	2	430.238
Mouse	P01901	1 - high confidence	TLLGYYN[115]QSKG	TLLGYYDQSKG	2	622.815
Mouse	P01901	1 - high confidence	YLKN[115]GN[115]ATLL	YLKDGDATLL	2	554.801
Mouse	P01901	1 - high confidence	LLGYYN[115]QSK	LLGYYDQSK	2	543.78
Mouse	P01901	1 - high confidence	YLKNGN[115]ATLLRTDSPK	YLKNGDATLLRTDSPK	2	896.487
Mouse	P01901	1 - high confidence	TLLGYYN[115]QS	TLLGYYDQS	2	530.256
Mouse	P01901	1 - high confidence	N[115]GN[115]ATLLRTDSPK	DGDATLLRTDSPK	2	694.857
Mouse	P01901	1 - high confidence	NGN[115]ATLLRTDSPK	NGDATLLRTDSPK	2	694.365
Mouse	P01901	1 - high confidence	YLKNGN[115]ATLLR	YLKNGDATLLR	2	632.359
Mouse	P01901	1 - high confidence	YLKN[115]GN[115]ATLLRTDSPK	YLKDGDATLLRTDSPK	2	896.979
Mouse	P01901	1 - high confidence	LGYYN[115]QSK	LGYYDQSK	2	487.238
Mouse	P01901	1 - high confidence	NGN[115]ATLLR	NGDATLLR	2	430.238
Mouse	P01901	1 - high confidence	YLKN[115]GN[115]ATLLR	YLKDGDATLLR	2	632.851
Mouse	P01901	1 - high confidence	N[115]GN[115]ATLLR	DGDATLLR	2	430.73
Mouse	P01901	1 - high confidence	TLLGYYN[115]QSK	TLLGYYDQSK	2	594.304
Mouse	P01902	1 - high confidence	LELGN[115]ETLLR	LELGDETLLR	2	579.825
Mouse	P01902	1 - high confidence	TAQRYYN[115]QSKGGSHTFQR	TAQRYYDQSKGGSHTFQR	2	1065.51
Mouse	P01902	1 - high confidence	EQN[115]YTCHVH	EQDYTCHVH	2	594.744
Mouse	P01902	1 - high confidence	YYN[115]QSKGGSHTFQR	YYDQSKGGSHTFQR	2	837.39
Mouse	P01902	1 - high confidence	YLELGN[115]ETLLR	YLELGDETLLR	2	661.357
Mouse	P01904	1 - high confidence	FSPPVVN[115]VTWLR	FSPPVVDVTWLR	2	708.391
Mouse	P01904	1 - high confidence	PPVVN[115]VTWLR	PPVVDVTWLR	2	591.341
Mouse	P01910	1 - high confidence	SN[115]STPATNEAPQATVFPK	SDSTPATNEAPQATVFPK	2	930.955
Mouse	P01910	1 - high confidence	VDNIFPPVIN[115]ITWLR	VDNIFPPVIDITWLR	2	899.502
Mouse	P01910	1 - high confidence	RSN[115]STPATNEAPQATVFPK	RSDSTPATNEAPQATVFPK	2	1009.01
Mouse	P02468	2 - putative	SAVQKN[115]ATSTK	SAVQKDATSTK	2	568.304
Mouse	P02468	2 - putative	VNDN[115]KTAAEEALRR	VNDDKTAAEEALRR	2	794.411
Mouse	P02468	2 - putative	LLN[115]N[115]LTSIK	LLDDLTSIK	2	509.298
Mouse	P02468	2 - putative	MAAANVSITQPESTGEPN[115]N[115]MTLLAEEAR	MAAANVSITQPESTGEPDDMTLLAEEAR	2	1474.19
Mouse	P02468	2 - putative	TAN[115]ETSAEAYN[115]LLLR	TADETSAEAYDLLLR	2	834.413
Mouse	P02468	2 - putative	ASAVQKN[115]ATSTK	ASAVQKDATSTK	2	603.823
Mouse	P02468	2 - putative	CDQCEENYFYN[115]R	CDQCEENYFYDR	2	849.815
Mouse	P02468	2 - putative	NDN[115]KTAAEEALR	NDDKTAAEEALR	2	666.826
Mouse	P02468	2 - putative	IASAVQKN[115]ATSTK	IASAVQKDATSTK	2	660.365
Mouse	P02468	2 - putative	MAAAN[115]VSITQPESTGEPN[115]NMTLLAEEAR	MAAADVSITQPESTGEPDNMTLLAEEAR	2	1474.19
Mouse	P02468	2 - putative	IASAVQKN[115]ATSTKADAER	IASAVQKDATSTKADAER	2	931.487
Mouse	P02468	2 - putative	TLAGEN[115]QTALEIEELNRK	TLAGEDQTALEIEELNRK	2	1015.53
Mouse	P02468	2 - putative	RVNDN[115]KTAAEEALR	RVNDDKTAAEEALR	2	794.411
Mouse	P02468	2 - putative	VNDN[115]KTAAEEALR	VNDDKTAAEEALR	2	716.36
Mouse	P02468	2 - putative	N[115]SSLHSQISR	DSSLHSQISR	2	565.286
Mouse	P02468	2 - putative	MAAAN[115]VSITQPESTGEPNN[115]MTLLAEEAR	MAAADVSITQPESTGEPNDMTLLAEEAR	2	1474.19
Mouse	P02468	2 - putative	RIPAIN[115]R	RIPAIDR	2	420.759
Mouse	P02468	2 - putative	LLNN[115]LTSIK	LLNDLTSIK	2	508.806
Mouse	P02468	2 - putative	VN[115]SSLHSQISR	VDSSLHSQISR	2	614.821
Mouse	P02468	2 - putative	TAN[115]ETSAEAYNLLLR	TADETSAEAYNLLLR	2	833.921
Mouse	P02468	2 - putative	TLAGEN[115]QTALEIEELNR	TLAGEDQTALEIEELNR	2	951.479
Mouse	P02469	2 - putative	AASEETLTN[115]ASQR	AASEETLTDASQR	2	689.829
Mouse	P02469	2 - putative	ASEETLTN[115]ASQR	ASEETLTDASQR	2	654.31
Mouse	P02469	2 - putative	VNASTTDPN[115]STVEQSALTR	VNASTTDPDSTVEQSALTR	2	996.482
Mouse	P02469	2 - putative	LATGN[115]VSGGVCDNCQHNTMGR	LATGDVSGGVCDNCQHNTMGR	2	1124.98
Mouse	P02469	2 - putative	RVN[115]ASTTDPNSTVEQSALTR	RVDASTTDPNSTVEQSALTR	2	1074.53
Mouse	P02469	2 - putative	RVN[115]ASTTDPN[115]STVEQSALTR	RVDASTTDPDSTVEQSALTR	2	1075.03
Mouse	P02469	2 - putative	GMN[115]YTVR	GMDYTVR	2	421.2
Mouse	P02469	2 - putative	PN[115]STVEQSALTR	PDSTVEQSALTR	2	652.331
Mouse	P02469	2 - putative	LTDTASQSN[115]STAGELGALQAEAESLDK	LTDTASQSDSTAGELGALQAEAESLDK	2	1354.64
Mouse	P02469	2 - putative	VN[115]ASTTDPNSTVEQSALTR	VDASTTDPNSTVEQSALTR	2	996.482
Mouse	P02469	2 - putative	VN[115]ASTTDPN[115]STVEQSALTR	VDASTTDPDSTVEQSALTR	2	996.974
Mouse	P02772	2 - putative	AN[115]FTEIQK	ADFTEIQK	2	476.246
Mouse	P03991	1 - high confidence	HLKN[115]GN[115]ATLLR	HLKDGDATLLR	2	619.849
Mouse	P03991	1 - high confidence	HLKNGN[115]ATLLR	HLKNGDATLLR	2	619.357
Mouse	P03991	1 - high confidence	N[115]GN[115]ATLLRTDSPK	DGDATLLRTDSPK	2	694.857
Mouse	P03991	1 - high confidence	NGN[115]ATLLRTDSPK	NGDATLLRTDSPK	2	694.365
Mouse	P03991	1 - high confidence	YYN[115]QSAGGSHTIQ	YYDQSAGGSHTIQ	2	713.818
Mouse	P03991	1 - high confidence	YYN[115]QSAGGSHTI	YYDQSAGGSHTI	2	649.789
Mouse	P03991	1 - high confidence	YYN[115]QSAGGSH	YYDQSAGGSH	2	542.723
Mouse	P03991	1 - high confidence	YN[115]QSAGGSHTIQR	YDQSAGGSHTIQR	2	710.337
Mouse	P03991	1 - high confidence	N[115]QSAGGSHTIQR	DQSAGGSHTIQR	2	628.806
Mouse	P03991	1 - high confidence	NGN[115]ATLLR	NGDATLLR	2	430.238
Mouse	P03991	1 - high confidence	YYN[115]QSAGGSHTIQR	YYDQSAGGSHTIQR	2	791.869
Mouse	P03991	1 - high confidence	N[115]GN[115]ATLLR	DGDATLLR	2	430.73
Mouse	P03995	3 - unspecific	LDQLTAN[115]SAR	LDQLTADSAR	2	545.283
Mouse	P03995	3 - unspecific	ALAAELN[115]QLR	ALAAELDQLR	2	550.312
Mouse	P03995	3 - unspecific	LEAENN[115]LAAYR	LEAENDLAAYR	2	632.815
Mouse	P03995	3 - unspecific	LEAEN[115]NLAAYR	LEAEDNLAAYR	2	632.815
Mouse	P04202	2 - putative	YSN[115]NSWR	YSDNSWR	2	464.204
Mouse	P04214	3 - unspecific	LQVAN[115]MSQGR	LQVADMSQGR	2	552.78
Mouse	P04223	1 - high confidence	YYN[115]QSAGGSHTFQR	YYDQSAGGSHTFQR	2	808.861
Mouse	P04223	1 - high confidence	YYN[115]QSAGGSH	YYDQSAGGSH	2	542.723
Mouse	P04227	1 - high confidence	RSN[115]FTPATNEAPQA	RSDFTPATNEAPQA	2	752.858
Mouse	P04227	1 - high confidence	SN[115]FTPATNEAPQATVFPK	SDFTPATNEAPQATVFPK	2	960.974
Mouse	P04227	1 - high confidence	VDNIFPPVIN[115]ITWLR	VDNIFPPVIDITWLR	2	899.502
Mouse	P04227	1 - high confidence	RSN[115]FTPATNEAPQATVFPK	RSDFTPATNEAPQATVFPK	2	1039.02
Mouse	P04235	1 - high confidence	GIYLCN[115]GTEQLAK	GIYLCDGTEQLAK	2	734.364
Mouse	P04426	2 - putative	ACN[115]SSSPALDGCELLCCGR	ACDSSSPALDGCELLCCGR	2	1064.43
Mouse	P04441	1 - high confidence	YGN[115]MTQDHVMHLLT	YGDMTQDHVMHLLT	2	830.88
Mouse	P04441	1 - high confidence	YGN[115]MTQDHVMHLLTR	YGDMTQDHVMHLLTR	2	908.93
Mouse	P04441	1 - high confidence	YGN[115]MTQDHVMH	YGDMTQDHVMH	2	667.272
Mouse	P04769	2 - putative	APIN[115]ASEAVLSDLK	APIDASEAVLSDLK	2	714.886
Mouse	P04925	1 - high confidence	CVN[115]ITIK	CVDITIK	2	424.734
Mouse	P04925	1 - high confidence	N[115]FTETDVK	DFTETDVK	2	477.727
Mouse	P04925	1 - high confidence	EN[115]FTETDVK	EDFTETDVK	2	542.249
Mouse	P04925	1 - high confidence	PVDQYSNQNN[115]FVHDCVN[115]ITIK	PVDQYSNQNDFVHDCVDITIK	2	1254.08
Mouse	P04925	1 - high confidence	YRPVDQYSNQNNFVHDCVN[115]ITIK	YRPVDQYSNQNNFVHDCVDITIK	2	1413.17
Mouse	P04925	1 - high confidence	QHTVTTTTKGEN[115]FTETDVK	QHTVTTTTKGEDFTETDVK	2	1069.52
Mouse	P04925	1 - high confidence	PVDQYSNQNNFVHDCVN[115]ITIK	PVDQYSNQNNFVHDCVDITIK	2	1253.59
Mouse	P04925	1 - high confidence	GEN[115]FTETDVK	GEDFTETDVK	2	570.759
Mouse	P05532	1 - high confidence	HN[115]GTVECK	HDGTVECK	2	473.211
Mouse	P05532	1 - high confidence	PQVSN[115]YSLIECDGK	PQVSDYSLIECDGK	2	805.875
Mouse	P05532	1 - high confidence	CPLTDPQVSN[115]YSLIECDGK	CPLTDPQVSDYSLIECDGK	2	1099
Mouse	P05532	1 - high confidence	ANN[115]TFGSAN[115]VTTTLK	ANDTFGSADVTTTLK	2	770.881
Mouse	P05532	1 - high confidence	AN[115]NTFGSAN[115]VTTTLK	ADNTFGSADVTTTLK	2	770.881
Mouse	P05555	1 - high confidence	LN[115]FTASEMTSK	LDFTASEMTSK	2	615.293
Mouse	P05555	1 - high confidence	IVASENN[115]MSR	IVASENDMSR	2	561.269
Mouse	P05555	1 - high confidence	LVSSTEILFN[115]DSAFALLPGQESYVR	LVSSTEILFDDSAFALLPGQESYVR	2	1379.21
Mouse	P05555	1 - high confidence	VASEN[115]NMSR	VASEDNMSR	2	504.727
Mouse	P05555	1 - high confidence	TQEIFN[115]VTLK	TQEIFDVTLK	2	597.327
Mouse	P05555	1 - high confidence	IQCDLPSFNTQEIFN[115]VTLK	IQCDLPSFNTQEIFDVTLK	2	1134.57
Mouse	P05555	1 - high confidence	DLPSFNTQEIFN[115]VTLK	DLPSFNTQEIFDVTLK	2	933.981
Mouse	P05555	1 - high confidence	GLDTLVVGGPQDFN[115]MSVTLR	GLDTLVVGGPQDFDMSVTLR	2	1060.54
Mouse	P05555	1 - high confidence	TPVLN[115]CSVAVCKR	TPVLDCSVAVCKR	2	752.887
Mouse	P05555	1 - high confidence	FFDETKN[115]NTR	FFDETKDNTR	2	636.799
Mouse	P05555	1 - high confidence	VASEN[115]N[115]MSR	VASEDDMSR	2	505.219
Mouse	P05555	1 - high confidence	NTQEIFN[115]VTLK	NTQEIFDVTLK	2	654.349
Mouse	P05555	1 - high confidence	VTFIN[115]TTR	VTFIDTTR	2	476.762
Mouse	P05555	1 - high confidence	SQN[115]LSSACHTEQK	SQDLSSACHTEQK	2	745.834
Mouse	P05555	1 - high confidence	AIVASEN[115]NMSR	AIVASEDNMSR	2	596.788
Mouse	P05555	1 - high confidence	FDETKN[115]NTR	FDETKDNTR	2	563.265
Mouse	P05555	1 - high confidence	GN[115]LSFDWYIK	GDLSFDWYIK	2	622.306
Mouse	P05555	1 - high confidence	DKVTFIN[115]TTR	DKVTFIDTTR	2	598.323
Mouse	P05555	1 - high confidence	TPVLN[115]CSVAVCK	TPVLDCSVAVCK	2	674.837
Mouse	P05555	1 - high confidence	VASENN[115]MSR	VASENDMSR	2	504.727
Mouse	P05555	1 - high confidence	AFFDETKN[115]NTR	AFFDETKDNTR	2	672.318
Mouse	P05555	1 - high confidence	AVN[115]QTGALYQCDYSTSR	AVDQTGALYQCDYSTSR	2	967.934
Mouse	P05555	1 - high confidence	LN[115]YTLVGEPLR	LDYTLVGEPLR	2	638.354
Mouse	P05555	1 - high confidence	YLN[115]FTASEMTSK	YLDFTASEMTSK	2	696.824
Mouse	P05555	1 - high confidence	AIVASEN[115]N[115]MSR	AIVASEDDMSR	2	597.28
Mouse	P05555	1 - high confidence	AIVASENN[115]MSR	AIVASENDMSR	2	596.788
Mouse	P05622	1 - high confidence	TPLGN[115]SSK	TPLGDSSK	2	402.712
Mouse	P05622	1 - high confidence	SPTPLGN[115]SSK	SPTPLGDSSK	2	494.754
Mouse	P05622	1 - high confidence	PQPN[115]VTWSTCR	PQPDVTWSTCR	2	673.815
Mouse	P05622	1 - high confidence	NN[115]SLGPELSER	NDSLGPELSER	2	608.797
Mouse	P05622	1 - high confidence	PTPLGN[115]SSK	PTPLGDSSK	2	451.238
Mouse	P05622	1 - high confidence	KLSPTPLGN[115]SSK	KLSPTPLGDSSK	2	615.343
Mouse	P05622	1 - high confidence	GMPQPN[115]VTWSTCR	GMPQPDVTWSTCR	2	767.846
Mouse	P05622	1 - high confidence	AIN[115]ISVIENGYVR	AIDISVIENGYVR	2	724.894
Mouse	P05622	1 - high confidence	AIN[115]ISVIEN[115]GYVR	AIDISVIEDGYVR	2	725.386
Mouse	P05622	1 - high confidence	LSPTPLGN[115]SSK	LSPTPLGDSSK	2	551.296
Mouse	P06332	1 - high confidence	FAGSGN[115]LTLTLDK	FAGSGDLTLTLDK	2	669.354
Mouse	P06332	1 - high confidence	VAQLNN[115]TLTCEVMGPTSPK	VAQLNDTLTCEVMGPTSPK	2	1031.01
Mouse	P06332	1 - high confidence	VAQLN[115]N[115]TLTCEVMGPTSPK	VAQLDDTLTCEVMGPTSPK	2	1031.5
Mouse	P06332	1 - high confidence	AGSGN[115]LTLTLDK	AGSGDLTLTLDK	2	595.82
Mouse	P06332	1 - high confidence	VQDSDFWN[115]CTVTLDQK	VQDSDFWDCTVTLDQK	2	978.939
Mouse	P06332	1 - high confidence	VAQLN[115]NTLTCEVMGPTSPK	VAQLDNTLTCEVMGPTSPK	2	1031.01
Mouse	P06336	3 - unspecific	NVN[115]VTWNQEK	NVDVTWNQEK	2	616.802
Mouse	P06339	1 - high confidence	TLLGYYN[115]QS	TLLGYYDQS	2	530.256
Mouse	P06339	1 - high confidence	LGN[115]ETLQR	LGDETLQR	2	466.249
Mouse	P06797	3 - unspecific	AEFAVAN[115]DTGFVDIPQQEK	AEFAVADDTGFVDIPQQEK	2	1040.5
Mouse	P06800	1 - high confidence	TSRPTDN[115]SINVT	TSRPTDDSINVT	2	653.321
Mouse	P06800	1 - high confidence	SLPNN[115]VTSF	SLPNDVTSF	2	490.243
Mouse	P06800	1 - high confidence	TKNLDFRKCN[115]SDN[115]ISYVLHCEPEN[115]NTK	TKNLDFRKCDSDDISYVLHCEPEDNTK	2	1650.25
Mouse	P06800	1 - high confidence	YVLHCEPEN[115]NTK	YVLHCEPEDNTK	2	752.843
Mouse	P06800	1 - high confidence	TKN[115]LDFRKCNSDN[115]ISYVLHCEPEN[115]NTK	TKDLDFRKCNSDDISYVLHCEPEDNTK	2	1650.25
Mouse	P06800	1 - high confidence	TSRPTDNSIN[115]VT	TSRPTDNSIDVT	2	653.321
Mouse	P06800	1 - high confidence	CNSDNISYVLHCEPENN[115]TK	CNSDNISYVLHCEPENDTK	2	1147.99
Mouse	P06800	1 - high confidence	GNITVN[115]YTYESSN[115]QTFK	GNITVDYTYESSDQTFK	2	984.45
Mouse	P06800	1 - high confidence	KCN[115]SDN[115]ISYVLHCEPENNTK	KCDSDDISYVLHCEPENNTK	2	1212.53
Mouse	P06800	1 - high confidence	NISVSN[115]DSCAPATTIDLYVPPGTDK	NISVSDDSCAPATTIDLYVPPGTDK	2	1318.63
Mouse	P06800	1 - high confidence	PN[115]NVTSFEVESLKPYK	PDNVTSFEVESLKPYK	2	926.973
Mouse	P06800	1 - high confidence	PTDN[115]SINVTCGPPYETN[115]GPK	PTDDSINVTCGPPYETDGPK	2	1081.98
Mouse	P06800	1 - high confidence	PTDN[115]SINVTCGPPYETNGPK	PTDDSINVTCGPPYETNGPK	2	1081.49
Mouse	P06800	1 - high confidence	SLPN[115]N[115]VTSFEVESLK	SLPDDVTSFEVESLK	2	833.418
Mouse	P06800	1 - high confidence	N[115]ITVN[115]YTYESSN[115]QTFK	DITVDYTYESSDQTFK	2	956.431
Mouse	P06800	1 - high confidence	FGN[115]ITVN[115]YTYESSN[115]QTFK	FGDITVDYTYESSDQTFK	2	1058.48
Mouse	P06800	1 - high confidence	TKNLDFRKCNSDN[115]ISYVLHCEPEN[115]NTK	TKNLDFRKCNSDDISYVLHCEPEDNTK	2	1649.76
Mouse	P06800	1 - high confidence	CNSDNISYVLHCEPEN[115]NTK	CNSDNISYVLHCEPEDNTK	2	1147.99
Mouse	P06800	1 - high confidence	SLPN[115]NVTSFEVESLKPY	SLPDNVTSFEVESLKPY	2	962.984
Mouse	P06800	1 - high confidence	TKN[115]LDFRKCNSDN[115]ISYVLHCEPENNTK	TKDLDFRKCNSDDISYVLHCEPENNTK	2	1649.76
Mouse	P06800	1 - high confidence	VN[115]YTYESSN[115]QTFK	VDYTYESSDQTFK	2	791.852
Mouse	P06800	1 - high confidence	GN[115]ITVN[115]YTYESSN[115]QTFK	GDITVDYTYESSDQTFK	2	984.942
Mouse	P06800	1 - high confidence	IQRN[115]GTAEKCNFHTK	IQRDGTAEKCNFHTK	2	902.945
Mouse	P06800	1 - high confidence	KCN[115]SDN[115]ISYVLHCEPENN[115]TK	KCDSDDISYVLHCEPENDTK	2	1213.02
Mouse	P06800	1 - high confidence	N[115]ISVSN[115]DSCAPATTIDLYVPPGTDK	DISVSDDSCAPATTIDLYVPPGTDK	2	1319.12
Mouse	P06800	1 - high confidence	CNSDN[115]ISYVLHCEPEN[115]N[115]TK	CNSDDISYVLHCEPEDDTK	2	1148.97
Mouse	P06800	1 - high confidence	KCNSDN[115]ISYVLHCEPENN[115]TK	KCNSDDISYVLHCEPENDTK	2	1212.53
Mouse	P06800	1 - high confidence	YESSN[115]QTFK	YESSDQTFK	2	552.749
Mouse	P06800	1 - high confidence	VLHCEPEN[115]NTK	VLHCEPEDNTK	2	671.312
Mouse	P06800	1 - high confidence	KCN[115]SDNISYVLHCEPENNTK	KCDSDNISYVLHCEPENNTK	2	1212.04
Mouse	P06800	1 - high confidence	SLPN[115]N[115]VTSFEVESLKPY	SLPDDVTSFEVESLKPY	2	963.476
Mouse	P06800	1 - high confidence	SLPN[115]NVTSFEVESLKPYK	SLPDNVTSFEVESLKPYK	2	1027.03
Mouse	P06800	1 - high confidence	SIN[115]VTCGPPYETN[115]GPK	SIDVTCGPPYETDGPK	2	868.399
Mouse	P06800	1 - high confidence	SYVLHCEPEN[115]NTK	SYVLHCEPEDNTK	2	796.36
Mouse	P06800	1 - high confidence	CN[115]SDN[115]ISYVLHCEPEN[115]NTK	CDSDDISYVLHCEPEDNTK	2	1148.97
Mouse	P06800	1 - high confidence	CN[115]SDNISYVLHCEPEN[115]NTK	CDSDNISYVLHCEPEDNTK	2	1148.48
Mouse	P06800	1 - high confidence	CNSDNISYVLHCEPEN[115]N[115]TK	CNSDNISYVLHCEPEDDTK	2	1148.48
Mouse	P06800	1 - high confidence	TSRPTDN[115]SINVTCGPPYETNGPK	TSRPTDDSINVTCGPPYETNGPK	2	1253.58
Mouse	P06800	1 - high confidence	SDN[115]ISYVLHCEPEN[115]NTK	SDDISYVLHCEPEDNTK	2	1011.44
Mouse	P06800	1 - high confidence	N[115]VTSFEVESLKPYK	DVTSFEVESLKPYK	2	821.425
Mouse	P06800	1 - high confidence	TSRPTDN[115]SIN[115]VTCGPPYETN[115]GPK	TSRPTDDSIDVTCGPPYETDGPK	2	1254.57
Mouse	P06800	1 - high confidence	TSRPTDN[115]SINVTCGPPYETN[115]GPK	TSRPTDDSINVTCGPPYETDGPK	2	1254.07
Mouse	P06800	1 - high confidence	SIN[115]VTCGPPYETNGPK	SIDVTCGPPYETNGPK	2	867.907
Mouse	P06800	1 - high confidence	SLPNN[115]VTSFEVESLK	SLPNDVTSFEVESLK	2	832.926
Mouse	P06800	1 - high confidence	AN[115]TSICLEWK	ADTSICLEWK	2	611.795
Mouse	P06800	1 - high confidence	KCNSDN[115]ISYVLHCEPENNTK	KCNSDDISYVLHCEPENNTK	2	1212.04
Mouse	P06800	1 - high confidence	KCN[115]SDN[115]ISYVLHCEPEN[115]NTK	KCDSDDISYVLHCEPEDNTK	2	1213.02
Mouse	P06800	1 - high confidence	TYESSN[115]QTFK	TYESSDQTFK	2	603.273
Mouse	P06800	1 - high confidence	CNSDN[115]ISYVLHCEPENN[115]TK	CNSDDISYVLHCEPENDTK	2	1148.48
Mouse	P06800	1 - high confidence	CNSDN[115]ISYVLHCEPENNTK	CNSDDISYVLHCEPENNTK	2	1147.99
Mouse	P06800	1 - high confidence	PTDNSIN[115]VTCGPPYETN[115]GPK	PTDNSIDVTCGPPYETDGPK	2	1081.98
Mouse	P06800	1 - high confidence	SLPNN[115]VTSFEVESLKPY	SLPNDVTSFEVESLKPY	2	962.984
Mouse	P06800	1 - high confidence	PTDNSIN[115]VTCGPPYETNGPK	PTDNSIDVTCGPPYETNGPK	2	1081.49
Mouse	P06800	1 - high confidence	CNSDN[115]ISYVLHCEPEN[115]NTK	CNSDDISYVLHCEPEDNTK	2	1148.48
Mouse	P06800	1 - high confidence	PN[115]N[115]VTSFEVESLKPYK	PDDVTSFEVESLKPYK	2	927.465
Mouse	P06800	1 - high confidence	TSRPTDNSIN[115]VTCGPPYETN[115]GPK	TSRPTDNSIDVTCGPPYETDGPK	2	1254.07
Mouse	P06800	1 - high confidence	KCNSDN[115]ISYVLHCEPEN[115]NTK	KCNSDDISYVLHCEPEDNTK	2	1212.53
Mouse	P06800	1 - high confidence	YTYESSN[115]QTFK	YTYESSDQTFK	2	684.804
Mouse	P06800	1 - high confidence	TSRPTDNSIN[115]VTCGPPYETNGPK	TSRPTDNSIDVTCGPPYETNGPK	2	1253.58
Mouse	P06800	1 - high confidence	SLPN[115]N[115]VTSFEVESLKPYK	SLPDDVTSFEVESLKPYK	2	1027.52
Mouse	P06800	1 - high confidence	PNN[115]VTSFEVESLKPYK	PNDVTSFEVESLKPYK	2	926.973
Mouse	P06800	1 - high confidence	AQTN[115]YTCVAEILYR	AQTDYTCVAEILYR	2	851.912
Mouse	P06800	1 - high confidence	SLPNN[115]VTSFEVESLKPYK	SLPNDVTSFEVESLKPYK	2	1027.03
Mouse	P06802	1 - high confidence	THNDCCIN[115]YSSVCQDK	THNDCCIDYSSVCQDK	2	1001.39
Mouse	P06802	1 - high confidence	MN[115]ASFSLK	MDASFSLK	2	449.724
Mouse	P06802	1 - high confidence	VYN[115]GSVPFEER	VYDGSVPFEER	2	649.31
Mouse	P07141	1 - high confidence	PNAN[115]ATER	PNADATER	2	437.21
Mouse	P07141	1 - high confidence	FKDNTPN[115]AN[115]ATER	FKDNTPDADATER	2	740.342
Mouse	P07141	1 - high confidence	FKDNTPN[115]ANATER	FKDNTPDANATER	2	739.85
Mouse	P07141	1 - high confidence	LQELSNNLN[115]SCFTK	LQELSNNLDSCFTK	2	834.902
Mouse	P07141	1 - high confidence	NFFN[115]ETK	NFFDETK	2	450.712
Mouse	P07141	1 - high confidence	DNTPNAN[115]ATER	DNTPNADATER	2	602.268
Mouse	P07141	1 - high confidence	FKDNTPNAN[115]ATER	FKDNTPNADATER	2	739.85
Mouse	P07356	2 - putative	TKGVDEVTIVNILTN[115]R	TKGVDEVTIVNILTDR	2	886.994
Mouse	P07356	2 - putative	GVDEVTIVN[115]ILTNR	GVDEVTIVDILTNR	2	772.423
Mouse	P07356	2 - putative	GVDEVTIVNILTN[115]R	GVDEVTIVNILTDR	2	772.423
Mouse	P07901	3 - unspecific	GVVDSEDLPLN[115]ISR	GVVDSEDLPLDISR	2	757.891
Mouse	P07901	3 - unspecific	LISN[115]SSDALDK	LISDSSDALDK	2	582.296
Mouse	P07901	3 - unspecific	ADLIN[115]NLGTIAK	ADLIDNLGTIAK	2	622.351
Mouse	P07901	3 - unspecific	ELISN[115]SSDALDK	ELISDSSDALDK	2	646.817
Mouse	P07901	3 - unspecific	GVVDSEDIPLN[115]LSR	GVVDSEDIPLDLSR	2	757.891
Mouse	P07901	3 - unspecific	YIDQEELN[115]K	YIDQEELDK	2	576.778
Mouse	P08101	1 - high confidence	YHHYSSN[115]F	YHHYSSDF	2	528.218
Mouse	P08101	1 - high confidence	SSN[115]FSIPK	SSDFSIPK	2	440.727
Mouse	P08101	1 - high confidence	KATVN[115]DSGEYR	KATVDDSGEYR	2	620.797
Mouse	P08101	1 - high confidence	EDTVTLTCEGTHNPGN[115]SSTQWFHN[115]GR	EDTVTLTCEGTHNPGDSSTQWFHDGR	2	1474.13
Mouse	P08101	1 - high confidence	EDTVTLTCEGTHNPGN[115]SSTQWFHNGR	EDTVTLTCEGTHNPGDSSTQWFHNGR	2	1473.64
Mouse	P08101	1 - high confidence	TVN[115]DSGEYR	TVDDSGEYR	2	521.231
Mouse	P08101	1 - high confidence	VN[115]DSGEYR	VDDSGEYR	2	470.707
Mouse	P08101	1 - high confidence	AN[115]HSHSGDYYCK	ADHSHSGDYYCK	2	720.289
Mouse	P08101	1 - high confidence	YHHYSSN[115]FSIPK	YHHYSSDFSIPK	2	740.849
Mouse	P08101	1 - high confidence	ATVN[115]DSGEYR	ATVDDSGEYR	2	556.749
Mouse	P08113	3 - unspecific	HN[115]N[115]DTQHIWE	HDDDTQHIWE	2	648.271
Mouse	P08113	3 - unspecific	LISN[115]ASDALDK	LISDASDALDK	2	574.299
Mouse	P08113	3 - unspecific	TDDEVVQREEEAIQLDGLN[115]ASQIR	TDDEVVQREEEAIQLDGLDASQIR	2	1365.17
Mouse	P08113	3 - unspecific	HN[115]N[115]DTQHIWESDSNEFSVIADPR	HDDDTQHIWESDSNEFSVIADPR	2	1357.09
Mouse	P08113	3 - unspecific	HNN[115]DTQHIWE	HNDDTQHIWE	2	647.779
Mouse	P08113	3 - unspecific	YN[115]DTFWK	YDDTFWK	2	487.719
Mouse	P08113	3 - unspecific	HNNDTQHIWESDSN[115]EFSVIADPR	HNNDTQHIWESDSDEFSVIADPR	2	1356.6
Mouse	P08113	3 - unspecific	GVVDSDDLPLN[115]VSR	GVVDSDDLPLDVSR	2	743.876
Mouse	P08113	3 - unspecific	LGVIEDHSN[115]R	LGVIEDHSDR	2	570.789
Mouse	P08113	3 - unspecific	ELISN[115]ASDALDK	ELISDASDALDK	2	638.82
Mouse	P08113	3 - unspecific	HN[115]NDTQHIWESDSNEFSVIADPR	HDNDTQHIWESDSNEFSVIADPR	2	1356.6
Mouse	P08113	3 - unspecific	EEEAIQLDGLN[115]ASQIR	EEEAIQLDGLDASQIR	2	893.948
Mouse	P08113	3 - unspecific	HNN[115]DTQHIWESDSNEFSVIADPR	HNDDTQHIWESDSNEFSVIADPR	2	1356.6
Mouse	P08121	2 - putative	ASQN[115]ITYH	ASQDITYH	2	467.72
Mouse	P08920	1 - high confidence	EVLAN[115]GSLK	EVLADGSLK	2	466.261
Mouse	P08920	1 - high confidence	DN[115]ETIWGVLGH	DDETIWGVLGH	2	621.296
Mouse	P08920	1 - high confidence	LISETYEVLAN[115]GSLK	LISETYEVLADGSLK	2	819.438
Mouse	P08920	1 - high confidence	MRN[115]DSGTYNVMVYGTNGMTR	MRDDSGTYNVMVYGTNGMTR	2	1134.5
Mouse	P08920	1 - high confidence	MRN[115]DSGTYNVMVYGTN[115]GMTR	MRDDSGTYNVMVYGTDGMTR	2	1134.99
Mouse	P08920	1 - high confidence	VSKPMIHWECPN[115]TTLTCAVLQGTDFELK	VSKPMIHWECPDTTLTCAVLQGTDFELK	2	1638.79
Mouse	P08920	1 - high confidence	N[115]DSGTYNVMVYGTNGMTR	DDSGTYNVMVYGTNGMTR	2	990.928
Mouse	P08920	1 - high confidence	KPPFLISETYEVLAN[115]GSLK	KPPFLISETYEVLADGSLK	2	1054.07
Mouse	P08920	1 - high confidence	SETYEVLAN[115]GSLK	SETYEVLADGSLK	2	706.354
Mouse	P08920	1 - high confidence	KKPPFLISETYEVLAN[115]GSLK	KKPPFLISETYEVLADGSLK	2	1118.12
Mouse	P08920	1 - high confidence	N[115]DSGTYNVMVYGTN[115]GMTR	DDSGTYNVMVYGTDGMTR	2	991.42
Mouse	P08920	1 - high confidence	N[115]MSYQWTNLNAPFK	DMSYQWTNLNAPFK	2	857.901
Mouse	P09055	1 - high confidence	SEVILEN[115]SK	SEVILEDSK	2	510.269
Mouse	P09055	1 - high confidence	SHFN[115]LTK	SHFDLTK	2	424.222
Mouse	P09055	1 - high confidence	CHEGN[115]GTFECGACRCNEGR	CHEGDGTFECGACRCNEGR	2	1136.43
Mouse	P09055	1 - high confidence	SAVGTLSGN[115]SSNVIQLIIDAYNSLSSEVILENSK	SAVGTLSGDSSNVIQLIIDAYNSLSSEVILENSK	2	1762.41
Mouse	P09055	1 - high confidence	KEN[115]SSEICSNN[115]	KEDSSEICSND	2	642.259
Mouse	P09055	1 - high confidence	NN[115]GECVCGQCVCR	NDGECVCGQCVCR	2	807.303
Mouse	P09055	1 - high confidence	N[115]GTGEN[115]GRK	DGTGEDGRK	2	467.718
Mouse	P09055	1 - high confidence	QECSHFN[115]LTK	QECSHFDLTK	2	632.788
Mouse	P09055	1 - high confidence	CSHFN[115]LTK	CSHFDLTK	2	504.237
Mouse	P09055	1 - high confidence	N[115]GTGENGRK	DGTGENGRK	2	467.226
Mouse	P09055	1 - high confidence	ASN[115]GQICN[115]GR	ASDGQICDGR	2	539.736
Mouse	P09055	1 - high confidence	KEN[115]SSEICSNNG	KEDSSEICSNNG	2	670.278
Mouse	P09055	1 - high confidence	DTCAQECSHFN[115]LTKVESR	DTCAQECSHFDLTKVESR	2	1091.98
Mouse	P09055	1 - high confidence	LRNPCTSEQN[115]CTSPFS	LRNPCTSEQDCTSPFS	2	949.907
Mouse	P09055	1 - high confidence	EN[115]SSEICSNNGECVCGQ	EDSSEICSNNGECVCGQ	2	972.857
Mouse	P09055	1 - high confidence	EN[115]SSEICSNN[115]GECVCGQ	EDSSEICSNDGECVCGQ	2	973.349
Mouse	P09055	1 - high confidence	ENSSEICSNN[115]GECVCGQCVCR	ENSSEICSNDGECVCGQCVCR	2	1260.47
Mouse	P09055	1 - high confidence	KEN[115]SSEICSNN[115]GE	KEDSSEICSNDGE	2	735.291
Mouse	P09055	1 - high confidence	KENSSEICSN[115]NGECVCGQCVCR	KENSSEICSDNGECVCGQCVCR	2	1324.52
Mouse	P09055	1 - high confidence	N[115]PCTSEQNCTSPFSYK	DPCTSEQNCTSPFSYK	2	960.894
Mouse	P09055	1 - high confidence	SAVGTLSGNSSN[115]VIQLIIDAY	SAVGTLSGNSSDVIQLIIDAY	2	1062.05
Mouse	P09055	1 - high confidence	SNGLICGGN[115]GVCR	SNGLICGGDGVCR	2	682.809
Mouse	P09055	1 - high confidence	KEN[115]SSEICSNNGECV	KEDSSEICSNNGECV	2	864.349
Mouse	P09055	1 - high confidence	NPCTSEQN[115]CTSPFSY	NPCTSEQDCTSPFSY	2	896.846
Mouse	P09055	1 - high confidence	SAVGTLSGN[115]SSNVIQLI	SAVGTLSGDSSNVIQLI	2	830.944
Mouse	P09055	1 - high confidence	EN[115]SSEICSN[115]NGECVCGQCVCR	EDSSEICSDNGECVCGQCVCR	2	1260.96
Mouse	P09055	1 - high confidence	ENSSEICSN[115]NGECVCGQCVCR	ENSSEICSDNGECVCGQCVCR	2	1260.47
Mouse	P09055	1 - high confidence	SAVGTLSGN[115]SSNVIQLIIDAY	SAVGTLSGDSSNVIQLIIDAY	2	1062.05
Mouse	P09055	1 - high confidence	SAVGTLSGNSSN[115]VIQ	SAVGTLSGNSSDVIQ	2	717.86
Mouse	P09055	1 - high confidence	HCECSTDEVN[115]SEDMDAYCR	HCECSTDEVDSEDMDAYCR	2	1189.92
Mouse	P09055	1 - high confidence	KEN[115]SSEICSN[115]N	KEDSSEICSDN	2	642.259
Mouse	P09055	1 - high confidence	N[115]GVN[115]GTGENGR	DGVDGTGENGR	2	538.737
Mouse	P09055	1 - high confidence	VN[115]GTGENGRK	VDGTGENGRK	2	516.76
Mouse	P09055	1 - high confidence	N[115]GECVCGQCVCR	DGECVCGQCVCR	2	750.281
Mouse	P09055	1 - high confidence	KEN[115]SSEICSNNGE	KEDSSEICSNNGE	2	734.799
Mouse	P09055	1 - high confidence	SAVGTLSGNSSN[115]VIQL	SAVGTLSGNSSDVIQL	2	774.402
Mouse	P09055	1 - high confidence	KEN[115]SSEICSNN[115]GECVCG	KEDSSEICSNDGECVCG	2	973.367
Mouse	P09055	1 - high confidence	KDTCAQECSHFN[115]LTKVESR	KDTCAQECSHFDLTKVESR	2	1156.03
Mouse	P09055	1 - high confidence	KENSSEICSN[115]N[115]GECVCGQCVCR	KENSSEICSDDGECVCGQCVCR	2	1325.01
Mouse	P09055	1 - high confidence	SAVGTLSGN[115]SSNVIQ	SAVGTLSGDSSNVIQ	2	717.86
Mouse	P09055	1 - high confidence	SCGECIQAGPN[115]CGWCTNTTFLQEGMPTSAR	SCGECIQAGPDCGWCTNTTFLQEGMPTSAR	2	1696.2
Mouse	P09055	1 - high confidence	ENSSEICSN[115]N[115]GECVCGQCVCR	ENSSEICSDDGECVCGQCVCR	2	1260.96
Mouse	P09055	1 - high confidence	GVN[115]GTGEN[115]GRK	GVDGTGEDGRK	2	545.763
Mouse	P09055	1 - high confidence	N[115]PCTSEQN[115]CTSPFSYK	DPCTSEQDCTSPFSYK	2	961.386
Mouse	P09055	1 - high confidence	SAVGTLSGN[115]SSN	SAVGTLSGDSSN	2	547.755
Mouse	P09055	1 - high confidence	CGWCTN[115]TTFLQEGMPTSAR	CGWCTDTTFLQEGMPTSAR	2	1109.47
Mouse	P09055	1 - high confidence	KEN[115]SSEICSNNGECVCG	KEDSSEICSNNGECVCG	2	972.875
Mouse	P09055	1 - high confidence	GVN[115]GTGEN[115]GR	GVDGTGEDGR	2	481.715
Mouse	P09055	1 - high confidence	SCGECIQAGPNCGWCTN[115]TTFLQEGMPTSAR	SCGECIQAGPNCGWCTDTTFLQEGMPTSAR	2	1696.2
Mouse	P09055	1 - high confidence	GVN[115]GTGENGR	GVDGTGENGR	2	481.223
Mouse	P09055	1 - high confidence	KEN[115]SSEICSNN	KEDSSEICSNN	2	641.767
Mouse	P09055	1 - high confidence	CHEGN[115]GTFECGA	CHEGDGTFECGA	2	670.241
Mouse	P09055	1 - high confidence	HEGN[115]GTFECGACR	HEGDGTFECGACR	2	748.291
Mouse	P09055	1 - high confidence	SYCKNGVN[115]GTGENGR	SYCKNGVDGTGENGR	2	807.355
Mouse	P09055	1 - high confidence	GVN[115]GTGENGRK	GVDGTGENGRK	2	545.271
Mouse	P09055	1 - high confidence	SYCKNGVN[115]GTGENGRK	SYCKNGVDGTGENGRK	2	871.403
Mouse	P09055	1 - high confidence	SYCKN[115]GVN[115]GTGEN[115]GRK	SYCKDGVDGTGEDGRK	2	872.387
Mouse	P09055	1 - high confidence	KEN[115]SSEICSN[115]NGECVCGQCVCR	KEDSSEICSDNGECVCGQCVCR	2	1325.01
Mouse	P09055	1 - high confidence	KEN[115]SSEICSN[115]NGECVCGQ	KEDSSEICSDNGECVCGQ	2	1037.4
Mouse	P09055	1 - high confidence	NGVN[115]GTGEN[115]GRK	NGVDGTGEDGRK	2	602.784
Mouse	P09055	1 - high confidence	TN[115]TTFLQEGMPTSAR	TDTTFLQEGMPTSAR	2	827.894
Mouse	P09055	1 - high confidence	LRNPCTSEQN[115]CTSPF	LRNPCTSEQDCTSPF	2	906.391
Mouse	P09055	1 - high confidence	SYCKN[115]GVN[115]GTGEN[115]GR	SYCKDGVDGTGEDGR	2	808.339
Mouse	P09055	1 - high confidence	SAVGTLSGN[115]SSNVIQL	SAVGTLSGDSSNVIQL	2	774.402
Mouse	P09055	1 - high confidence	ECSHFN[115]LTK	ECSHFDLTK	2	568.759
Mouse	P09055	1 - high confidence	NGVN[115]GTGEN[115]GR	NGVDGTGEDGR	2	538.737
Mouse	P09055	1 - high confidence	AQECSHFN[115]LTK	AQECSHFDLTK	2	668.307
Mouse	P09055	1 - high confidence	KEN[115]SSEICSN	KEDSSEICSN	2	584.746
Mouse	P09055	1 - high confidence	EN[115]SSEICSNNGECVCGQCVCR	EDSSEICSNNGECVCGQCVCR	2	1260.47
Mouse	P09055	1 - high confidence	N[115]GVN[115]GTGEN[115]GRK	DGVDGTGEDGRK	2	603.276
Mouse	P09055	1 - high confidence	CAQECSHFN[115]LTK	CAQECSHFDLTK	2	748.322
Mouse	P09055	1 - high confidence	LRNPCTSEQN[115]CTSPFSYK	LRNPCTSEQDCTSPFSYK	2	1095.49
Mouse	P09055	1 - high confidence	CTN[115]TTFLQEGMPTSAR	CTDTTFLQEGMPTSAR	2	907.909
Mouse	P09055	1 - high confidence	EN[115]SSEICSNN[115]GECVCGQCVCR	EDSSEICSNDGECVCGQCVCR	2	1260.96
Mouse	P09055	1 - high confidence	CTSEQN[115]CTSPFSYK	CTSEQDCTSPFSYK	2	855.346
Mouse	P09055	1 - high confidence	KEN[115]SSEICSN[115]N[115]GECVCGQCVCR	KEDSSEICSDDGECVCGQCVCR	2	1325.5
Mouse	P09055	1 - high confidence	KEN[115]SSEICSNN[115]GECVCGQ	KEDSSEICSNDGECVCGQ	2	1037.4
Mouse	P09055	1 - high confidence	NGVN[115]GTGENGRK	NGVDGTGENGRK	2	602.292
Mouse	P09055	1 - high confidence	NPCTSEQN[115]CTSPF	NPCTSEQDCTSPF	2	771.798
Mouse	P09055	1 - high confidence	TSEQN[115]CTSPFSYK	TSEQDCTSPFSYK	2	775.33
Mouse	P09055	1 - high confidence	PCTSEQN[115]CTSPFSYK	PCTSEQDCTSPFSYK	2	903.872
Mouse	P09055	1 - high confidence	KEN[115]SSEICSNNGECVCGQ	KEDSSEICSNNGECVCGQ	2	1036.9
Mouse	P09055	1 - high confidence	TCAQECSHFN[115]LTK	TCAQECSHFDLTK	2	798.846
Mouse	P09055	1 - high confidence	N[115]GVN[115]GTGEN[115]GR	DGVDGTGEDGR	2	539.229
Mouse	P09055	1 - high confidence	CHEGN[115]GTFECGACR	CHEGDGTFECGACR	2	828.306
Mouse	P09055	1 - high confidence	NGVN[115]GTGENGR	NGVDGTGENGR	2	538.245
Mouse	P09055	1 - high confidence	KEN[115]SSEICSNNGECVCGQCVCR	KEDSSEICSNNGECVCGQCVCR	2	1324.52
Mouse	P09055	1 - high confidence	KEN[115]SSEICSNN[115]GECVCGQCVCR	KEDSSEICSNDGECVCGQCVCR	2	1325.01
Mouse	P09055	1 - high confidence	DTCAQECSHFN[115]LTK	DTCAQECSHFDLTK	2	856.359
Mouse	P09055	1 - high confidence	KDTCAQECSHFN[115]LTK	KDTCAQECSHFDLTK	2	920.407
Mouse	P09055	1 - high confidence	NPCTSEQN[115]CTSPFSYK	NPCTSEQDCTSPFSYK	2	960.894
Mouse	P09242	1 - high confidence	VVDGERENVSMVDYAHNN[115]YQAQ	VVDGERENVSMVDYAHNDYQAQ	2	1270.06
Mouse	P09242	1 - high confidence	KVVDGEREN[115]VSMVDYAHNNYQAQSAVPLR	KVVDGEREDVSMVDYAHNNYQAQSAVPLR	2	1645.8
Mouse	P09242	1 - high confidence	HSHYVWN[115]R	HSHYVWDR	2	550.26
Mouse	P09242	1 - high confidence	VVDGERENVSMVDYAHN[115]NYQAQSAVPLR	VVDGERENVSMVDYAHDNYQAQSAVPLR	2	1581.75
Mouse	P09242	1 - high confidence	N[115]TTQGNEVTSILR	DTTQGNEVTSILR	2	717.368
Mouse	P09242	1 - high confidence	VVDGEREN[115]VSMVDYAHN[115]NYQAQ	VVDGEREDVSMVDYAHDNYQAQ	2	1270.56
Mouse	P09242	1 - high confidence	KYMYPKN[115]RTDVEYELDEKAR	KYMYPKDRTDVEYELDEKAR	2	1275.12
Mouse	P09242	1 - high confidence	EN[115]VSMVDYAH	EDVSMVDYAH	2	583.248
Mouse	P09242	1 - high confidence	EN[115]VSMVDYAHNN[115]YQAQSAVPLR	EDVSMVDYAHNDYQAQSAVPLR	2	1254.58
Mouse	P09242	1 - high confidence	VVDGERENVSMVDYAHNN[115]YQAQSAVPLR	VVDGERENVSMVDYAHNDYQAQSAVPLR	2	1581.75
Mouse	P09242	1 - high confidence	VVDGEREN[115]VSMVDYAHN	VVDGEREDVSMVDYAHN	2	967.934
Mouse	P09242	1 - high confidence	N[115]RTDVEYELDEKARG	DRTDVEYELDEKARG	2	898.429
Mouse	P09242	1 - high confidence	VVDGEREN[115]VSMVDYAHNN[115]YQAQSAVPLR	VVDGEREDVSMVDYAHNDYQAQSAVPLR	2	1582.24
Mouse	P09242	1 - high confidence	EN[115]VSMVDYAHNNYQAQ	EDVSMVDYAHNNYQAQ	2	942.4
Mouse	P09242	1 - high confidence	ENVSMVDYAHNN[115]YQAQSAVPLR	ENVSMVDYAHNDYQAQSAVPLR	2	1254.09
Mouse	P09242	1 - high confidence	DGEREN[115]VSMVDYAHNNYQAQSAVPLR	DGEREDVSMVDYAHNNYQAQSAVPLR	2	1482.68
Mouse	P09242	1 - high confidence	KYMYPKN[115]RTDVEYELDEK	KYMYPKDRTDVEYELDEK	2	1161.55
Mouse	P09242	1 - high confidence	CN[115]TTQGN[115]EVTSILR	CDTTQGDEVTSILR	2	797.876
Mouse	P09242	1 - high confidence	VVDGERENVSMVDYAHN[115]N[115]YQAQSAVPLR	VVDGERENVSMVDYAHDDYQAQSAVPLR	2	1582.24
Mouse	P09242	1 - high confidence	ENVSMVDYAHN[115]NYQAQSAVPLR	ENVSMVDYAHDNYQAQSAVPLR	2	1254.09
Mouse	P09242	1 - high confidence	EN[115]VSMVDYAHN[115]NYQAQSAVPLR	EDVSMVDYAHDNYQAQSAVPLR	2	1254.58
Mouse	P09242	1 - high confidence	N[115]N[115]LTDPSLSEMVEVALR	DDLTDPSLSEMVEVALR	2	945.465
Mouse	P09242	1 - high confidence	ENVSMVDYAHN[115]N[115]YQAQSAVPLR	ENVSMVDYAHDDYQAQSAVPLR	2	1254.58
Mouse	P09242	1 - high confidence	TRCN[115]TTQGN[115]EVTSILR	TRCDTTQGDEVTSILR	2	926.45
Mouse	P09242	1 - high confidence	VVDGEREN[115]VSMVDYAH	VVDGEREDVSMVDYAH	2	910.913
Mouse	P09242	1 - high confidence	YMYPKN[115]RTDVEYELDEK	YMYPKDRTDVEYELDEK	2	1097.51
Mouse	P09242	1 - high confidence	N[115]NLTDPSLSEMVEVALR	DNLTDPSLSEMVEVALR	2	944.973
Mouse	P09242	1 - high confidence	YMYPKN[115]RTDVEYELDEKAR	YMYPKDRTDVEYELDEKAR	2	1211.08
Mouse	P09242	1 - high confidence	EN[115]VSMVDYAHNNYQAQSAVPLR	EDVSMVDYAHNNYQAQSAVPLR	2	1254.09
Mouse	P09242	1 - high confidence	VVDGEREN[115]VSMVDYAHNNYQAQ	VVDGEREDVSMVDYAHNNYQAQ	2	1270.06
Mouse	P09242	1 - high confidence	N[115]RTDVEYELDEKAR	DRTDVEYELDEKAR	2	869.919
Mouse	P09242	1 - high confidence	VVDGEREN[115]VSMVDYAHN[115]NYQAQSAVPLR	VVDGEREDVSMVDYAHDNYQAQSAVPLR	2	1582.24
Mouse	P09242	1 - high confidence	CN[115]TTQGNEVTSILR	CDTTQGNEVTSILR	2	797.384
Mouse	P09242	1 - high confidence	VVDGEREN[115]VSMVDYAHNNYQAQSAVPLR	VVDGEREDVSMVDYAHNNYQAQSAVPLR	2	1581.75
Mouse	P09242	1 - high confidence	TRCN[115]TTQGNEVTSILR	TRCDTTQGNEVTSILR	2	925.958
Mouse	P09242	1 - high confidence	N[115]RTDVEYELDEK	DRTDVEYELDEK	2	756.35
Mouse	P09242	1 - high confidence	NN[115]LTDPSLSEMVEVALR	NDLTDPSLSEMVEVALR	2	944.973
Mouse	P09405	3 - unspecific	TLVLSN[115]LSYSATK	TLVLSDLSYSATK	2	699.383
Mouse	P09470	1 - high confidence	TFDVSNFQN[115]SSIK	TFDVSNFQDSSIK	2	744.357
Mouse	P09470	1 - high confidence	N[115]ETHFDAGAK	DETHFDAGAK	2	545.747
Mouse	P09470	1 - high confidence	STEVSN[115]HTLK	STEVSDHTLK	2	558.783
Mouse	P09581	1 - high confidence	SVGN[115]SSQYFR	SVGDSSQYFR	2	573.268
Mouse	P09581	1 - high confidence	THN[115]SVGN[115]SSQYFR	THDSVGDSSQYFR	2	749.835
Mouse	P09581	1 - high confidence	HN[115]MTYFCK	HDMTYFCK	2	551.231
Mouse	P09581	1 - high confidence	THNSVGN[115]SSQYFR	THNSVGDSSQYFR	2	749.343
Mouse	P09793	1 - high confidence	NTVGFLDYPFCSGTFN[115]ESR	NTVGFLDYPFCSGTFDESR	2	1106.49
Mouse	P09793	1 - high confidence	VN[115]LTIQGLR	VDLTIQGLR	2	507.804
Mouse	P09803	1 - high confidence	AEMDREDAEHVKN[115]STYVA	AEMDREDAEHVKDSTYVA	2	1033.46
Mouse	P09803	1 - high confidence	EDAEHVKN[115]STYVAL	EDAEHVKDSTYVAL	2	788.881
Mouse	P09803	1 - high confidence	AEMDREDAEHVKN[115]STY	AEMDREDAEHVKDSTY	2	948.41
Mouse	P0C192	1 - high confidence	VIVEPPTDLN[115]VTEGMAAELK	VIVEPPTDLDVTEGMAAELK	2	1064.05
Mouse	P0C192	1 - high confidence	DIPN[115]LTALVR	DIPDLTALVR	2	556.822
Mouse	P0C192	1 - high confidence	VPSN[115]TTCCAR	VPSDTTCCAR	2	583.753
Mouse	P0C192	1 - high confidence	PSN[115]TTCCAR	PSDTTCCAR	2	534.219
Mouse	P0C192	1 - high confidence	TGTSMTSVNWLTPN[115]GTLMTHGSYR	TGTSMTSVNWLTPDGTLMTHGSYR	2	1307.11
Mouse	P0C192	1 - high confidence	ETVPSN[115]TTCCAR	ETVPSDTTCCAR	2	698.798
Mouse	P0C7W3	2 - putative	SWVQGN[115]LTACGR	SWVQGDLTACGR	2	675.32
Mouse	P10287	1 - high confidence	VLN[115]ITDK	VLDITDK	2	402.232
Mouse	P10287	1 - high confidence	AVSEN[115]GASVEEPMN[115]ISIIVTDQNDNKPK	AVSEDGASVEEPMDISIIVTDQNDNKPK	2	1501.22
Mouse	P10287	1 - high confidence	AVSEN[115]GASVEEPMNISIIVTDQN[115]DNKPK	AVSEDGASVEEPMNISIIVTDQDDNKPK	2	1501.22
Mouse	P10287	1 - high confidence	AVSENGASVEEPMN[115]ISIIVTDQN[115]DNKPK	AVSENGASVEEPMDISIIVTDQDDNKPK	2	1501.22
Mouse	P10287	1 - high confidence	AVSENGASVEEPMN[115]ISIIVTDQNDNKPK	AVSENGASVEEPMDISIIVTDQNDNKPK	2	1500.73
Mouse	P10300	1 - high confidence	QTPSSLLVQTN[115]HTAK	QTPSSLLVQTDHTAK	2	813.431
Mouse	P10300	1 - high confidence	IQTPSSLLVQTN[115]HTAK	IQTPSSLLVQTDHTAK	2	869.973
Mouse	P10300	1 - high confidence	LIQTPSSLLVQTN[115]HTAK	LIQTPSSLLVQTDHTAK	2	926.515
Mouse	P10300	1 - high confidence	SLLVQTN[115]HTAK	SLLVQTDHTAK	2	606.836
Mouse	P10404	1 - high confidence	EGVAVLGTYSN[115]HTSAPAN[115]CSVASQHK	EGVAVLGTYSDHTSAPADCSVASQHK	2	1344.12
Mouse	P10404	1 - high confidence	LCN[115]TTQK	LCDTTQK	2	433.211
Mouse	P10404	1 - high confidence	ALCN[115]TTQK	ALCDTTQK	2	468.729
Mouse	P10404	1 - high confidence	VTNLMTGQTAN[115]AT	VTNLMTGQTADAT	2	661.819
Mouse	P10404	1 - high confidence	LLN[115]LVDGAYQALNLTSPDK	LLDLVDGAYQALNLTSPDK	2	1023.54
Mouse	P10404	1 - high confidence	THQALCN[115]TT	THQALCDTT	2	523.735
Mouse	P10404	1 - high confidence	VAVLGTYSN[115]HTSAPAN[115]CSVASQHK	VAVLGTYSDHTSAPADCSVASQHK	2	1251.09
Mouse	P10404	1 - high confidence	THQALCN[115]TTQ	THQALCDTTQ	2	587.765
Mouse	P10404	1 - high confidence	LMTGQTAN[115]ATSLLGTMTDAFPK	LMTGQTADATSLLGTMTDAFPK	2	1135.56
Mouse	P10404	1 - high confidence	LTLSEVTGQGLCVGAVPKTHQALCN[115]TTQK	LTLSEVTGQGLCVGAVPKTHQALCDTTQK	2	1556.79
Mouse	P10404	1 - high confidence	TAN[115]ATSLLGTMTDAFPK	TADATSLLGTMTDAFPK	2	870.433
Mouse	P10404	1 - high confidence	VTN[115]LMTGQTAN[115]ATSLLGTMTDAFPK	VTDLMTGQTADATSLLGTMTDAFPK	2	1293.13
Mouse	P10404	1 - high confidence	CLVAGPPYYEGVAVLGTYSN[115]HTSAPAN[115]CSVASQHK	CLVAGPPYYEGVAVLGTYSDHTSAPADCSVASQHK	2	1854.36
Mouse	P10404	1 - high confidence	VTNLMTGQTAN[115]ATSLLGT	VTNLMTGQTADATSLLGT	2	897.454
Mouse	P10404	1 - high confidence	KTHQALCN[115]TTQK	KTHQALCDTTQK	2	715.859
Mouse	P10404	1 - high confidence	PYYEGVAVLGTYSN[115]HTSAPAN[115]CSVASQHK	PYYEGVAVLGTYSDHTSAPADCSVASQHK	2	1555.71
Mouse	P10404	1 - high confidence	VDGAYQALN[115]LTSPDK	VDGAYQALDLTSPDK	2	796.897
Mouse	P10404	1 - high confidence	SAPAN[115]CSVASQHK	SAPADCSVASQHK	2	679.315
Mouse	P10404	1 - high confidence	TGQTAN[115]ATSLLGTMTDAFPK	TGQTADATSLLGTMTDAFPK	2	1013.5
Mouse	P10404	1 - high confidence	HDSPHQVFN[115]VTWR	HDSPHQVFDVTWR	2	812.39
Mouse	P10404	1 - high confidence	HTSAPAN[115]CSVASQHK	HTSAPADCSVASQHK	2	798.368
Mouse	P10404	1 - high confidence	LLN[115]LVDGAYQALN[115]LTSPDK	LLDLVDGAYQALDLTSPDK	2	1024.04
Mouse	P10404	1 - high confidence	VTN[115]LMTGQTANATSLLGTMTDAFPK	VTDLMTGQTANATSLLGTMTDAFPK	2	1292.64
Mouse	P10404	1 - high confidence	VLGTYSN[115]HTSAPAN[115]CSVASQHK	VLGTYSDHTSAPADCSVASQHK	2	1166.04
Mouse	P10404	1 - high confidence	AVLGTYSN[115]HTSAPAN[115]CSVASQHK	AVLGTYSDHTSAPADCSVASQHK	2	1201.56
Mouse	P10404	1 - high confidence	NLVDGAYQALN[115]LTSPDK	NLVDGAYQALDLTSPDK	2	910.46
Mouse	P10404	1 - high confidence	AN[115]CSVASQHK	ADCSVASQHK	2	551.754
Mouse	P10404	1 - high confidence	TSAPAN[115]CSVASQHK	TSAPADCSVASQHK	2	729.839
Mouse	P10404	1 - high confidence	APAN[115]CSVASQHK	APADCSVASQHK	2	635.799
Mouse	P10404	1 - high confidence	PAN[115]CSVASQHK	PADCSVASQHK	2	600.28
Mouse	P10404	1 - high confidence	GVAVLGTYSN[115]HTSAPAN[115]CSVASQHK	GVAVLGTYSDHTSAPADCSVASQHK	2	1279.6
Mouse	P10404	1 - high confidence	QALCN[115]TTQK	QALCDTTQK	2	532.759
Mouse	P10404	1 - high confidence	VTNLMTGQTAN[115]ATSL	VTNLMTGQTADATSL	2	761.878
Mouse	P10404	1 - high confidence	N[115]HTSAPAN[115]CSVASQHK	DHTSAPADCSVASQHK	2	855.882
Mouse	P10404	1 - high confidence	LVAGPPYYEGVAVLGTYSN[115]HTSAPAN[115]CSVASQHK	LVAGPPYYEGVAVLGTYSDHTSAPADCSVASQHK	2	1774.35
Mouse	P10404	1 - high confidence	N[115]CSVASQHK	DCSVASQHK	2	516.235
Mouse	P10404	1 - high confidence	LGTYSN[115]HTSAPAN[115]CSVASQHK	LGTYSDHTSAPADCSVASQHK	2	1116.51
Mouse	P10404	1 - high confidence	VAGPPYYEGVAVLGTYSN[115]HTSAPAN[115]CSVASQHK	VAGPPYYEGVAVLGTYSDHTSAPADCSVASQHK	2	1717.8
Mouse	P10404	1 - high confidence	LN[115]LTSPDK	LDLTSPDK	2	444.74
Mouse	P10404	1 - high confidence	PHQVFN[115]VTWR	PHQVFDVTWR	2	642.831
Mouse	P10404	1 - high confidence	HQALCN[115]TTQK	HQALCDTTQK	2	601.288
Mouse	P10404	1 - high confidence	YSN[115]HTSAPAN[115]CSVASQHK	YSDHTSAPADCSVASQHK	2	980.929
Mouse	P10404	1 - high confidence	AYQALN[115]LTSPDK	AYQALDLTSPDK	2	661.338
Mouse	P10404	1 - high confidence	TYSN[115]HTSAPAN[115]CSVASQHK	TYSDHTSAPADCSVASQHK	2	1031.45
Mouse	P10404	1 - high confidence	SN[115]HTSAPAN[115]CSVASQHK	SDHTSAPADCSVASQHK	2	899.398
Mouse	P10404	1 - high confidence	LVDGAYQALN[115]LTSPDK	LVDGAYQALDLTSPDK	2	853.439
Mouse	P10404	1 - high confidence	ALN[115]LTSPDK	ALDLTSPDK	2	480.259
Mouse	P10404	1 - high confidence	VQHDSPHQVFN[115]VTWR	VQHDSPHQVFDVTWR	2	925.953
Mouse	P10404	1 - high confidence	YQALN[115]LTSPDK	YQALDLTSPDK	2	625.82
Mouse	P10404	1 - high confidence	YEGVAVLGTYSN[115]HTSAPAN[115]CSVASQHK	YEGVAVLGTYSDHTSAPADCSVASQHK	2	1425.66
Mouse	P10404	1 - high confidence	GTYSN[115]HTSAPAN[115]CSVASQHK	GTYSDHTSAPADCSVASQHK	2	1059.96
Mouse	P10404	1 - high confidence	QALN[115]LTSPDK	QALDLTSPDK	2	544.288
Mouse	P10404	1 - high confidence	VTNLMTGQTAN[115]ATSLLGTMTDAFPK	VTNLMTGQTADATSLLGTMTDAFPK	2	1292.64
Mouse	P10404	1 - high confidence	LLNLVDGAYQALN[115]LTSPDK	LLNLVDGAYQALDLTSPDK	2	1023.54
Mouse	P10404	1 - high confidence	GAYQALN[115]LTSPDK	GAYQALDLTSPDK	2	689.849
Mouse	P10404	1 - high confidence	DSPHQVFN[115]VTWR	DSPHQVFDVTWR	2	743.86
Mouse	P10404	1 - high confidence	THQALCN[115]TTQK	THQALCDTTQK	2	651.812
Mouse	P10493	2 - putative	CVAN[115]YTGN[115]GR	CVADYTGDGR	2	557.238
Mouse	P10605	3 - unspecific	PPCEHHVN[115]GSRPPCTGEGDTPR	PPCEHHVDGSRPPCTGEGDTPR	2	1229.54
Mouse	P10605	3 - unspecific	QN[115]TTWQAGR	QDTTWQAGR	2	531.755
Mouse	P10761	1 - high confidence	TVDVFHFAN[115]SSR	TVDVFHFADSSR	2	690.834
Mouse	P10810	1 - high confidence	NPSPDELPQVGN[115]LSLKG	NPSPDELPQVGDLSLKG	2	883.455
Mouse	P10810	1 - high confidence	N[115]PSPDELPQVGN[115]LSLKG	DPSPDELPQVGDLSLKG	2	883.947
Mouse	P10810	1 - high confidence	VLSIAQAHSLN[115]F	VLSIAQAHSLDF	2	650.851
Mouse	P10810	1 - high confidence	DELPQVGN[115]LSLK	DELPQVGDLSLK	2	657.354
Mouse	P10810	1 - high confidence	SIAQAHSLN[115]FSCEQVR	SIAQAHSLDFSCEQVR	2	924.442
Mouse	P10810	1 - high confidence	SLN[115]LSFTGLK	SLDLSFTGLK	2	540.803
Mouse	P10810	1 - high confidence	PQVGN[115]LSLK	PQVGDLSLK	2	478.777
Mouse	P10810	1 - high confidence	N[115]VSWATR	DVSWATR	2	417.712
Mouse	P10810	1 - high confidence	LDRN[115]PSPDELPQVGN[115]LSLK	LDRDPSPDELPQVGDLSLK	2	1047.54
Mouse	P10810	1 - high confidence	LDRNPSPDELPQVGN[115]LSLK	LDRNPSPDELPQVGDLSLK	2	1047.05
Mouse	P10810	1 - high confidence	VLSIAQAHSLN[115]FSCEQVR	VLSIAQAHSLDFSCEQVR	2	1030.52
Mouse	P10810	1 - high confidence	PSPDELPQVGN[115]LSLK	PSPDELPQVGDLSLK	2	797.923
Mouse	P10810	1 - high confidence	SPDELPQVGN[115]LSLK	SPDELPQVGDLSLK	2	749.396
Mouse	P10810	1 - high confidence	SLN[115]FSCEQVR	SLDFSCEQVR	2	620.788
Mouse	P10810	1 - high confidence	N[115]PSPDELPQVGN[115]LSLK	DPSPDELPQVGDLSLK	2	855.436
Mouse	P10810	1 - high confidence	NPSPDELPQVGN[115]LSLK	NPSPDELPQVGDLSLK	2	854.944
Mouse	P10852	1 - high confidence	NQKDEIN[115]ETDLKQ	NQKDEIDETDLKQ	2	788.381
Mouse	P10852	1 - high confidence	N[115]STFTGER	DSTFTGER	2	456.71
Mouse	P10852	1 - high confidence	PRPVSLN[115]MTVK	PRPVSLDMTVK	2	621.85
Mouse	P10852	1 - high confidence	SLN[115]MTVK	SLDMTVK	2	397.213
Mouse	P10852	1 - high confidence	VSLN[115]MTVK	VSLDMTVK	2	446.747
Mouse	P10852	1 - high confidence	LMNAPLYLAEWQN[115]IT	LMNAPLYLAEWQDIT	2	889.448
Mouse	P10852	1 - high confidence	TSDLLLTSSYLSN[115]STFTGER	TSDLLLTSSYLSDSTFTGER	2	1097.03
Mouse	P10852	1 - high confidence	FLN[115]ATGSQWCSWS	FLDATGSQWCSWS	2	772.83
Mouse	P10852	1 - high confidence	DVGKLMNAPLYLAEWQN[115]ITK	DVGKLMNAPLYLAEWQDITK	2	1153.1
Mouse	P10852	1 - high confidence	SDLLLTSSYLSN[115]STFTGER	SDLLLTSSYLSDSTFTGER	2	1046.51
Mouse	P10852	1 - high confidence	FLN[115]ATGSQWCS	FLDATGSQWCS	2	636.275
Mouse	P10852	1 - high confidence	RPVSLN[115]MTVK	RPVSLDMTVK	2	573.324
Mouse	P10852	1 - high confidence	IPRPVSLN[115]MTVK	IPRPVSLDMTVK	2	678.392
Mouse	P10852	1 - high confidence	FLN[115]ATGSQW	FLDATGSQW	2	512.743
Mouse	P10852	1 - high confidence	STSDLLLTSSYLSN[115]STFTGER	STSDLLLTSSYLSDSTFTGER	2	1140.55
Mouse	P10852	1 - high confidence	LLTSSYLSN[115]STFTGER	LLTSSYLSDSTFTGER	2	888.939
Mouse	P10852	1 - high confidence	LTSSYLSN[115]STFTGER	LTSSYLSDSTFTGER	2	832.397
Mouse	P10852	1 - high confidence	SN[115]STFTGER	SDSTFTGER	2	500.226
Mouse	P10852	1 - high confidence	ESTSDLLLTSSYLSN[115]STFTGER	ESTSDLLLTSSYLSDSTFTGER	2	1205.07
Mouse	P10852	1 - high confidence	LYLAEWQN[115]ITK	LYLAEWQDITK	2	690.367
Mouse	P10852	1 - high confidence	PLYLAEWQN[115]ITK	PLYLAEWQDITK	2	738.893
Mouse	P10852	1 - high confidence	HIPRPVSLN[115]MTVK	HIPRPVSLDMTVK	2	746.922
Mouse	P10852	1 - high confidence	APLMPWN[115]ESSIFH	APLMPWDESSIFH	2	765.361
Mouse	P10852	1 - high confidence	APLMPWN[115]ESSIF	APLMPWDESSIF	2	696.832
Mouse	P10852	1 - high confidence	MNAPLYLAEWQN[115]ITK	MNAPLYLAEWQDITK	2	896.954
Mouse	P10852	1 - high confidence	N[115]QKDEIN[115]ETDLK	DQKDEIDETDLK	2	724.844
Mouse	P10852	1 - high confidence	LMN[115]APLYLAEWQN[115]ITK	LMDAPLYLAEWQDITK	2	953.988
Mouse	P10852	1 - high confidence	FLN[115]ATGSQWCSW	FLDATGSQWCSW	2	729.314
Mouse	P10852	1 - high confidence	FLN[115]ATGSQWC	FLDATGSQWC	2	592.759
Mouse	P10852	1 - high confidence	AEWQN[115]ITK	AEWQDITK	2	495.751
Mouse	P10852	1 - high confidence	DEIN[115]ETDLK	DEIDETDLK	2	539.254
Mouse	P10852	1 - high confidence	APLMPWN[115]ESSIFHIPRPVSLN[115]MTVK	APLMPWDESSIFHIPRPVSLDMTVK	2	1433.74
Mouse	P10852	1 - high confidence	ILESTSDLLLTSSYLSN[115]STFTGER	ILESTSDLLLTSSYLSDSTFTGER	2	1318.16
Mouse	P10852	1 - high confidence	YLSN[115]STFTGER	YLSDSTFTGER	2	638.299
Mouse	P10852	1 - high confidence	SSYLSN[115]STFTGER	SSYLSDSTFTGER	2	725.331
Mouse	P10852	1 - high confidence	NAPLYLAEWQN[115]ITK	NAPLYLAEWQDITK	2	831.433
Mouse	P10852	1 - high confidence	APLYLAEWQN[115]ITK	APLYLAEWQDITK	2	774.412
Mouse	P10852	1 - high confidence	LSN[115]STFTGER	LSDSTFTGER	2	556.768
Mouse	P10852	1 - high confidence	LAEWQN[115]ITK	LAEWQDITK	2	552.293
Mouse	P10852	1 - high confidence	SYLSN[115]STFTGER	SYLSDSTFTGER	2	681.815
Mouse	P10852	1 - high confidence	TSSYLSN[115]STFTGER	TSSYLSDSTFTGER	2	775.855
Mouse	P10852	1 - high confidence	NQKDEIN[115]ETDLK	NQKDEIDETDLK	2	724.352
Mouse	P10852	1 - high confidence	APLMPWN[115]ESSIFHIPR	APLMPWDESSIFHIPR	2	948.48
Mouse	P10852	1 - high confidence	YLAEWQN[115]ITK	YLAEWQDITK	2	633.825
Mouse	P10852	1 - high confidence	LMNAPLYLAEWQN[115]ITK	LMNAPLYLAEWQDITK	2	953.496
Mouse	P10852	1 - high confidence	PVSLN[115]MTVK	PVSLDMTVK	2	495.273
Mouse	P11032	2 - putative	EVN[115]ITVIDR	EVDITVIDR	2	530.291
Mouse	P11087	2 - putative	LMSTEASQN[115]ITYHCK	LMSTEASQDITYHCK	2	892.406
Mouse	P11087	2 - putative	LICICHN[115]GTAVCDDVQCNEELDCPNPQR	LICICHDGTAVCDDVQCNEELDCPNPQR	2	1694.71
Mouse	P11087	2 - putative	LMSTEASQN[115]ITYH	LMSTEASQDITYH	2	748.343
Mouse	P11152	1 - high confidence	TPEDTAEDTCHLIPGLADSVSNCHFN[115]HSSK	TPEDTAEDTCHLIPGLADSVSNCHFDHSSK	2	1670.73
Mouse	P11214	2 - putative	CTSQHLFN[115]K	CTSQHLFDK	2	568.267
Mouse	P11276	2 - putative	NVN[115]DTFHK	NVDDTFHK	2	488.233
Mouse	P11276	2 - putative	CIVDDITYNVN[115]DTFHK	CIVDDITYNVDDTFHK	2	977.949
Mouse	P11276	2 - putative	MLN[115]CTCFGQGR	MLDCTCFGQGR	2	672.781
Mouse	P11276	2 - putative	DAPTNLQFVN[115]ETDR	DAPTNLQFVDETDR	2	810.882
Mouse	P11276	2 - putative	NLQFVN[115]ETDR	NLQFVDETDR	2	618.799
Mouse	P11276	2 - putative	TPLN[115]SSTIIGYR	TPLDSSTIIGYR	2	661.854
Mouse	P11276	2 - putative	APTNLQFVN[115]ETDR	APTNLQFVDETDR	2	753.368
Mouse	P11276	2 - putative	PTNLQFVN[115]ETDR	PTNLQFVDETDR	2	717.85
Mouse	P11276	2 - putative	LDAPTN[115]LQFVN[115]ETDR	LDAPTDLQFVDETDR	2	867.916
Mouse	P11276	2 - putative	LN[115]CTCFGQGR	LDCTCFGQGR	2	607.261
Mouse	P11276	2 - putative	DQCIVDDITYN[115]VNDTFHK	DQCIVDDITYDVNDTFHK	2	1099.49
Mouse	P11276	2 - putative	PLN[115]SSTIIGYR	PLDSSTIIGYR	2	611.33
Mouse	P11276	2 - putative	RHEEGHMLN[115]CTCFGQGR	RHEEGHMLDCTCFGQGR	2	1045.44
Mouse	P11276	2 - putative	N[115]YTDCTSEGR	DYTDCTSEGR	2	602.236
Mouse	P11276	2 - putative	WTPLN[115]SSTIIGYR	WTPLDSSTIIGYR	2	754.894
Mouse	P11276	2 - putative	DQCIVDDITYNVN[115]DTFHK	DQCIVDDITYNVDDTFHK	2	1099.49
Mouse	P11276	2 - putative	HEEGHMLN[115]CTCFGQGR	HEEGHMLDCTCFGQGR	2	967.394
Mouse	P11276	2 - putative	LDAPTNLQFVN[115]ETDR	LDAPTNLQFVDETDR	2	867.424
Mouse	P11370	1 - high confidence	YLALN[115]MTN[115]PTK	YLALDMTDPTK	2	634.319
Mouse	P11370	1 - high confidence	LQAAMHN[115]DLK	LQAAMHDDLK	2	571.29
Mouse	P11438	1 - high confidence	LSSGN[115]FSK	LSSGDFSK	2	420.712
Mouse	P11438	1 - high confidence	N[115]NGTTCIMASF	DNGTTCIMASF	2	608.755
Mouse	P11438	1 - high confidence	FSISN[115]HSLK	FSISDHSLK	2	517.272
Mouse	P11438	1 - high confidence	AFNISPNDTSSGSCGIN[115]LVTLK	AFNISPNDTSSGSCGIDLVTLK	2	1148.56
Mouse	P11438	1 - high confidence	ISPNDTSSGSCGIN[115]LVTLK	ISPNDTSSGSCGIDLVTLK	2	982.489
Mouse	P11438	1 - high confidence	NISPN[115]DTSSGSCGINLVTLK	NISPDDTSSGSCGINLVTLK	2	1039.51
Mouse	P11438	1 - high confidence	N[115]ISPN[115]DTSSGSCGINLVTLK	DISPDDTSSGSCGINLVTLK	2	1040
Mouse	P11438	1 - high confidence	N[115]GSSCGKEN[115]VSDPSLTITFGR	DGSSCGKEDVSDPSLTITFGR	2	1114.51
Mouse	P11438	1 - high confidence	YN[115]VTGNN[115]GTCLLAS	YDVTGNDGTCLLAS	2	743.333
Mouse	P11438	1 - high confidence	ISPN[115]DTSSGSCGINLVTLK	ISPDDTSSGSCGINLVTLK	2	982.489
Mouse	P11438	1 - high confidence	MALQLN[115]ITYLK	MALQLDITYLK	2	654.868
Mouse	P11438	1 - high confidence	TYN[115]LSDTEHFPNAISK	TYDLSDTEHFPNAISK	2	919.437
Mouse	P11438	1 - high confidence	YSVQHMYFTYN[115]LSDTEHFPNAISK	YSVQHMYFTYDLSDTEHFPNAISK	2	1447.16
Mouse	P11438	1 - high confidence	N[115]LSDTEHFPNAISK	DLSDTEHFPNAISK	2	787.381
Mouse	P11438	1 - high confidence	SASFLTTYETAN[115]GSQIVN[115]ISLPASAEVLK	SASFLTTYETADGSQIVDISLPASAEVLK	2	1507.27
Mouse	P11438	1 - high confidence	AFNISPN[115]DTSSGSCGIN[115]LVTLK	AFNISPDDTSSGSCGIDLVTLK	2	1149.05
Mouse	P11438	1 - high confidence	AYLSSGN[115]FSK	AYLSSGDFSK	2	537.762
Mouse	P11438	1 - high confidence	LN[115]MTLPDALVPTFSISN[115]H	LDMTLPDALVPTFSISDH	2	986.493
Mouse	P11438	1 - high confidence	ALQLN[115]ITYLK	ALQLDITYLK	2	589.348
Mouse	P11438	1 - high confidence	GYLLTLN[115]FTKN[115]TTR	GYLLTLDFTKDTTR	2	822.439
Mouse	P11438	1 - high confidence	NN[115]GTTCIMASF	NDGTTCIMASF	2	608.755
Mouse	P11438	1 - high confidence	FTYN[115]LSDTEHFPNAISK	FTYDLSDTEHFPNAISK	2	992.971
Mouse	P11438	1 - high confidence	YN[115]VTGNN[115]GTCLLASM	YDVTGNDGTCLLASM	2	808.853
Mouse	P11438	1 - high confidence	ETAN[115]GSQIVN[115]ISLPASAEVLK	ETADGSQIVDISLPASAEVLK	2	1072.06
Mouse	P11438	1 - high confidence	GYLLTLN[115]FTK	GYLLTLDFTK	2	585.827
Mouse	P11438	1 - high confidence	LN[115]MTLPDALVPTFSISN[115]HSLK	LDMTLPDALVPTFSISDHSLK	2	1150.6
Mouse	P11438	1 - high confidence	AFN[115]ISPN[115]DTSSGSCGINLVTLK	AFDISPDDTSSGSCGINLVTLK	2	1149.05
Mouse	P11438	1 - high confidence	VYMKN[115]VTVVLR	VYMKDVTVVLR	2	661.882
Mouse	P11438	1 - high confidence	AFNISPN[115]DTSSGSCGINLVTLK	AFNISPDDTSSGSCGINLVTLK	2	1148.56
Mouse	P11438	1 - high confidence	EN[115]VSDPSLTITFGR	EDVSDPSLTITFGR	2	768.884
Mouse	P11438	1 - high confidence	DATIQAYLSSGN[115]FSK	DATIQAYLSSGDFSK	2	801.889
Mouse	P11438	1 - high confidence	N[115]VTVVLR	DVTVVLR	2	401.248
Mouse	P11499	3 - unspecific	GVVDSEDIPLN[115]LSR	GVVDSEDIPLDLSR	2	757.891
Mouse	P11499	3 - unspecific	ADLIN[115]NLGTIAK	ADLIDNLGTIAK	2	622.351
Mouse	P11499	3 - unspecific	YIDQEELN[115]K	YIDQEELDK	2	576.778
Mouse	P11499	3 - unspecific	ELISN[115]ASDALDK	ELISDASDALDK	2	638.82
Mouse	P11627	1 - high confidence	SHIVVPAN[115]TTSA	SHIVVPADTTSA	2	599.312
Mouse	P11627	1 - high confidence	ILTKDN[115]QTYMAVEGSTAY	ILTKDDQTYMAVEGSTAY	2	1003.48
Mouse	P11627	1 - high confidence	THNLTN[115]LNPDLQYR	THNLTDLNPDLQYR	2	850.427
Mouse	P11627	1 - high confidence	FPTN[115]SSSR	FPTDSSSR	2	448.712
Mouse	P11627	1 - high confidence	PFLVVSN[115]TSTFVPYEIK	PFLVVSDTSTFVPYEIK	2	971.517
Mouse	P11627	1 - high confidence	PYAN[115]GTLSIR	PYADGTLSIR	2	546.791
Mouse	P11627	1 - high confidence	SGSFTIEGN[115]NSFAQR	SGSFTIEGDNSFAQR	2	808.374
Mouse	P11627	1 - high confidence	SGSFTIEGNN[115]SFAQR	SGSFTIEGNDSFAQR	2	808.374
Mouse	P11627	1 - high confidence	GEGN[115]ETN[115]NMVITWK	GEGDETDNMVITWK	2	797.859
Mouse	P11627	1 - high confidence	YFCQAANDQNN[115]VTIL	YFCQAANDQNDVTIL	2	886.404
Mouse	P11627	1 - high confidence	LVVSN[115]TSTFVPYEIK	LVVSDTSTFVPYEIK	2	849.456
Mouse	P11627	1 - high confidence	THN[115]LTNLNPDLQY	THDLTNLNPDLQY	2	772.376
Mouse	P11627	1 - high confidence	YFCQAANDQNN[115]VTILAN	YFCQAANDQNDVTILAN	2	978.944
Mouse	P11627	1 - high confidence	VLTSDN[115]HSDYICNAHFPGTR	VLTSDDHSDYICNAHFPGTR	2	1153.02
Mouse	P11627	1 - high confidence	GYN[115]VTYWWK	GYDVTYWWK	2	609.288
Mouse	P11627	1 - high confidence	FFPYAN[115]GTLSIR	FFPYADGTLSIR	2	693.859
Mouse	P11627	1 - high confidence	TIEGN[115]N[115]SFAQR	TIEGDDSFAQR	2	619.789
Mouse	P11627	1 - high confidence	DN[115]QTYMAVEGSTAY	DDQTYMAVEGSTAY	2	775.822
Mouse	P11627	1 - high confidence	GEGN[115]ETNNMVITWK	GEGDETNNMVITWK	2	797.367
Mouse	P11627	1 - high confidence	GEGN[115]ETNNMVITWKPLR	GEGDETNNMVITWKPLR	2	980.486
Mouse	P11627	1 - high confidence	DN[115]QTYMAVEGSTAYLLCK	DDQTYMAVEGSTAYLLCK	2	1032.97
Mouse	P11627	1 - high confidence	TIEGN[115]NSFAQR	TIEGDNSFAQR	2	619.297
Mouse	P11627	1 - high confidence	PGN[115]QTSTTLK	PGDQTSTTLK	2	524.272
Mouse	P11627	1 - high confidence	THN[115]LTNLNPDLQYR	THDLTNLNPDLQYR	2	850.427
Mouse	P11627	1 - high confidence	DLQAN[115]DTGR	DLQADDTGR	2	495.731
Mouse	P11627	1 - high confidence	LLFPTN[115]SSSR	LLFPTDSSSR	2	561.796
Mouse	P11627	1 - high confidence	EQLFFN[115]LSDPELR	EQLFFDLSDPELR	2	804.902
Mouse	P11627	1 - high confidence	VPGN[115]QTSTTLK	VPGDQTSTTLK	2	573.807
Mouse	P11688	1 - high confidence	FAVN[115]QSR	FAVDQSR	2	411.712
Mouse	P11688	1 - high confidence	VTGLSN[115]CTSN[115]YTPNSQGLELDPETSP	VTGLSDCTSDYTPNSQGLELDPETSP	2	1392.12
Mouse	P11688	1 - high confidence	VTGLSN[115]CTSN[115]YTPN	VTGLSDCTSDYTPN	2	765.328
Mouse	P11688	1 - high confidence	YLSTEN[115]FTR	YLSTEDFTR	2	566.272
Mouse	P11688	1 - high confidence	LRN[115]ESEFR	LRDESEFR	2	526.265
Mouse	P11688	1 - high confidence	N[115]ALNLTFHAQNLGEGGAYEAELR	DALNLTFHAQNLGEGGAYEAELR	2	1245.11
Mouse	P11688	1 - high confidence	NLN[115]N[115]SQSNVVSFPLSVEAQ	NLDDSQSNVVSFPLSVEAQ	2	1025
Mouse	P11688	1 - high confidence	NLNNSQSN[115]VVSFPLSVEAQA	NLNNSQSDVVSFPLSVEAQA	2	1060.02
Mouse	P11688	1 - high confidence	VTGLSN[115]CTSN	VTGLSDCTSN	2	527.233
Mouse	P11688	1 - high confidence	VTGLSN[115]CTSNYTPNSQGLELDPETSPH	VTGLSDCTSNYTPNSQGLELDPETSPH	2	1460.15
Mouse	P11688	1 - high confidence	VTGLSNCTSN[115]YTPNSQGLELDPETSPHH	VTGLSNCTSDYTPNSQGLELDPETSPHH	2	1528.68
Mouse	P11688	1 - high confidence	NDPVGTCYLSTEN[115]FTR	NDPVGTCYLSTEDFTR	2	937.918
Mouse	P11688	1 - high confidence	PGN[115]FSSLSCDYFAVN[115]QSR	PGDFSSLSCDYFAVDQSR	2	1025.95
Mouse	P11688	1 - high confidence	SSLSCDYFAVN[115]QSR	SSLSCDYFAVDQSR	2	817.862
Mouse	P11688	1 - high confidence	VTGLSN[115]CTSN[115]YTPNSQGL	VTGLSDCTSDYTPNSQGL	2	957.926
Mouse	P11688	1 - high confidence	N[115]ALN[115]LTFHAQNLGEGGAYEAELR	DALDLTFHAQNLGEGGAYEAELR	2	1245.6
Mouse	P11688	1 - high confidence	NLNNSQSN[115]VVSFPLSVEAQAQ	NLNNSQSDVVSFPLSVEAQAQ	2	1124.05
Mouse	P11688	1 - high confidence	VTGLSN[115]CTSNYTPN[115]SQGLELDPETSPH	VTGLSDCTSNYTPDSQGLELDPETSPH	2	1460.65
Mouse	P11688	1 - high confidence	YFAVN[115]QSR	YFAVDQSR	2	493.244
Mouse	P11688	1 - high confidence	PQNDPVGTCYLSTEN[115]FTR	PQNDPVGTCYLSTEDFTR	2	1050.47
Mouse	P11688	1 - high confidence	IALN[115]FSLDPK	IALDFSLDPK	2	559.811
Mouse	P11688	1 - high confidence	N[115]LNNSQSNVVSFPLSVEA	DLNNSQSNVVSFPLSVEA	2	960.474
Mouse	P11688	1 - high confidence	N[115]ALN[115]LTFHAQ	DALDLTFHAQ	2	565.78
Mouse	P11688	1 - high confidence	N[115]LNNSQSNVVSFPLSVEAQA	DLNNSQSNVVSFPLSVEAQA	2	1060.02
Mouse	P11688	1 - high confidence	VTGLSN[115]CTSN[115]YTPN[115]SQGLELDPETSPHHLQ	VTGLSDCTSDYTPDSQGLELDPETSPHHLQ	2	1650.24
Mouse	P11688	1 - high confidence	VTGLSN[115]CTSNYTPNSQGLELDPETSPHH	VTGLSDCTSNYTPNSQGLELDPETSPHH	2	1528.68
Mouse	P11688	1 - high confidence	VTGLSNCTSN[115]YTPNSQGLELDPETSPH	VTGLSNCTSDYTPNSQGLELDPETSPH	2	1460.15
Mouse	P11688	1 - high confidence	VTGLSNCTSNYTPN[115]SQGLELDPETSPHHLQ	VTGLSNCTSNYTPDSQGLELDPETSPHHLQ	2	1649.25
Mouse	P11688	1 - high confidence	N[115]LNNSQSNVVSFPLSVEAQ	DLNNSQSNVVSFPLSVEAQ	2	1024.5
Mouse	P11688	1 - high confidence	N[115]LNNSQSNVVSFPLSVEAQAQ	DLNNSQSNVVSFPLSVEAQAQ	2	1124.05
Mouse	P11688	1 - high confidence	VTGLSN[115]CTSNYTPN[115]SQGLELDPETSPHH	VTGLSDCTSNYTPDSQGLELDPETSPHH	2	1529.18
Mouse	P11688	1 - high confidence	NLN[115]NSQSNVVSFPLSVEA	NLDNSQSNVVSFPLSVEA	2	960.474
Mouse	P11688	1 - high confidence	VTGLSNCTSNYTPN[115]SQGLELDPETSPHH	VTGLSNCTSNYTPDSQGLELDPETSPHH	2	1528.68
Mouse	P11688	1 - high confidence	VTGLSN[115]CTSN[115]YTPNSQGLELDPETSPH	VTGLSDCTSDYTPNSQGLELDPETSPH	2	1460.65
Mouse	P11688	1 - high confidence	NLNNSQSN[115]VVSFPL	NLNNSQSDVVSFPL	2	767.384
Mouse	P11688	1 - high confidence	NLNN[115]SQSNVVSFPLSVEAQA	NLNDSQSNVVSFPLSVEAQA	2	1060.02
Mouse	P11688	1 - high confidence	VTGLSNCTSN[115]YTPN[115]SQGLELDPETSPHH	VTGLSNCTSDYTPDSQGLELDPETSPHH	2	1529.18
Mouse	P11688	1 - high confidence	VTGLSNCTSN[115]YTPN[115]SQGLELDPETSPHHLQ	VTGLSNCTSDYTPDSQGLELDPETSPHHLQ	2	1649.75
Mouse	P11688	1 - high confidence	SCDYFAVN[115]QSR	SCDYFAVDQSR	2	674.288
Mouse	P11688	1 - high confidence	LSPIHIALN[115]F	LSPIHIALDF	2	563.322
Mouse	P11688	1 - high confidence	LSTEN[115]FTR	LSTEDFTR	2	484.741
Mouse	P11688	1 - high confidence	VTGLSNCTSN[115]YTPNSQGLELDPETSPHHLQ	VTGLSNCTSDYTPNSQGLELDPETSPHHLQ	2	1649.25
Mouse	P11688	1 - high confidence	VTGLSN[115]CTSNYTPN	VTGLSDCTSNYTPN	2	764.836
Mouse	P11688	1 - high confidence	N[115]LNNSQSNVVSFPL	DLNNSQSNVVSFPL	2	767.384
Mouse	P11688	1 - high confidence	NLNN[115]SQSNVVSFPLSVEAQAQ	NLNDSQSNVVSFPLSVEAQAQ	2	1124.05
Mouse	P11688	1 - high confidence	NLNN[115]SQSNVVSFPL	NLNDSQSNVVSFPL	2	767.384
Mouse	P11688	1 - high confidence	VTGLSN[115]CTSNYTPN[115]SQGLELDPETSPHHLQ	VTGLSDCTSNYTPDSQGLELDPETSPHHLQ	2	1649.75
Mouse	P11688	1 - high confidence	NLNN[115]SQSNVVSFPLSVEAQ	NLNDSQSNVVSFPLSVEAQ	2	1024.5
Mouse	P11688	1 - high confidence	YLRN[115]ESEFR	YLRDESEFR	2	607.797
Mouse	P11688	1 - high confidence	N[115]ALN[115]LTFH	DALDLTFH	2	466.233
Mouse	P11688	1 - high confidence	NALNLTFHAQN[115]LGEGGAYEAELR	NALNLTFHAQDLGEGGAYEAELR	2	1245.11
Mouse	P11688	1 - high confidence	IYLRN[115]ESEFR	IYLRDESEFR	2	664.339
Mouse	P11688	1 - high confidence	PVGTCYLSTEN[115]FTR	PVGTCYLSTEDFTR	2	823.383
Mouse	P11688	1 - high confidence	NLN[115]NSQSNVVSFPLSVEAQA	NLDNSQSNVVSFPLSVEAQA	2	1060.02
Mouse	P11688	1 - high confidence	VTGLSN[115]CTSNYTPNSQGLELDPETSPHHLQ	VTGLSDCTSNYTPNSQGLELDPETSPHHLQ	2	1649.25
Mouse	P11688	1 - high confidence	NLN[115]NSQSNVVSFPLSVEAQAQ	NLDNSQSNVVSFPLSVEAQAQ	2	1124.05
Mouse	P11688	1 - high confidence	NALN[115]LTFHAQ	NALDLTFHAQ	2	565.288
Mouse	P11688	1 - high confidence	NLN[115]NSQSNVVSFPL	NLDNSQSNVVSFPL	2	767.384
Mouse	P11688	1 - high confidence	VTGLSN[115]CTSN[115]YTPNSQGLELDPETSPHH	VTGLSDCTSDYTPNSQGLELDPETSPHH	2	1529.18
Mouse	P11688	1 - high confidence	NALN[115]LTFHAQNLGEGGAYEAELR	NALDLTFHAQNLGEGGAYEAELR	2	1245.11
Mouse	P11688	1 - high confidence	GN[115]LTYGYVTVLN[115]GSDIH	GDLTYGYVTVLDGSDIH	2	912.939
Mouse	P11688	1 - high confidence	NLN[115]NSQSNVVSFPLSVEAQ	NLDNSQSNVVSFPLSVEAQ	2	1024.5
Mouse	P11688	1 - high confidence	GN[115]FSSLSCDYFAVN[115]QSR	GDFSSLSCDYFAVDQSR	2	977.421
Mouse	P11688	1 - high confidence	DPQNDPVGTCYLSTEN[115]FTR	DPQNDPVGTCYLSTEDFTR	2	1107.99
Mouse	P11688	1 - high confidence	HPGN[115]FSSLSCDYFAVN[115]QSR	HPGDFSSLSCDYFAVDQSR	2	1094.48
Mouse	P11688	1 - high confidence	TEKDPQNDPVGTCYLSTEN[115]FTR	TEKDPQNDPVGTCYLSTEDFTR	2	1287.08
Mouse	P11688	1 - high confidence	NALN[115]LTFH	NALDLTFH	2	465.741
Mouse	P11688	1 - high confidence	VTGLSN[115]CTSN[115]YTPNSQGLELDPETSPHHLQ	VTGLSDCTSDYTPNSQGLELDPETSPHHLQ	2	1649.75
Mouse	P11835	1 - high confidence	N[115]FTGPGEPDSLR	DFTGPGEPDSLR	2	645.805
Mouse	P11835	1 - high confidence	GPFEKN[115]CSVQCAGM	GPFEKDCSVQCAGM	2	793.329
Mouse	P11835	1 - high confidence	GQAAAFN[115]VTFR	GQAAAFDVTFR	2	591.802
Mouse	P11835	1 - high confidence	KDN[115]SSIVCSGLGD	KDDSSIVCSGLGD	2	676.807
Mouse	P11835	1 - high confidence	AAFN[115]VTFR	AAFDVTFR	2	463.743
Mouse	P11835	1 - high confidence	DN[115]SSIVCSGLGDCICGQCVCH	DDSSIVCSGLGDCICGQCVCH	2	1199.97
Mouse	P11835	1 - high confidence	GPFEKN[115]CSVQCAGMTLQ	GPFEKDCSVQCAGMTLQ	2	964.424
Mouse	P11835	1 - high confidence	DN[115]SSIVCSGLGDCICGQCVCHTSDVPNK	DDSSIVCSGLGDCICGQCVCHTSDVPNK	2	1570.65
Mouse	P11835	1 - high confidence	YLRPGQAAAFN[115]VTFR	YLRPGQAAAFDVTFR	2	856.452
Mouse	P11835	1 - high confidence	YN[115]SQVCGGSDR	YDSQVCGGSDR	2	622.257
Mouse	P11835	1 - high confidence	KDN[115]SSIVCSGLGDCICGQCVCH	KDDSSIVCSGLGDCICGQCVCH	2	1264.01
Mouse	P11835	1 - high confidence	KDN[115]SSIVCSGLGDCICGQ	KDDSSIVCSGLGDCICGQ	2	985.919
Mouse	P11835	1 - high confidence	VTLYLRPGQAAAFN[115]VTFR	VTLYLRPGQAAAFDVTFR	2	1013.05
Mouse	P11835	1 - high confidence	DN[115]HTSCAECLKFDK	DDHTSCAECLKFDK	2	863.367
Mouse	P11835	1 - high confidence	GPFEKN[115]CSVQCAGMTLQTIPLK	GPFEKDCSVQCAGMTLQTIPLK	2	1240.61
Mouse	P11835	1 - high confidence	KDN[115]SSIVCSGLGDCICGQCVCHTSDVPNK	KDDSSIVCSGLGDCICGQCVCHTSDVPNK	2	1634.7
Mouse	P11835	1 - high confidence	DN[115]HTSCAECLK	DDHTSCAECLK	2	668.272
Mouse	P11835	1 - high confidence	PGQAAAFN[115]VTFR	PGQAAAFDVTFR	2	640.328
Mouse	P11835	1 - high confidence	LRPGQAAAFN[115]VTFR	LRPGQAAAFDVTFR	2	774.921
Mouse	P11835	1 - high confidence	LN[115]FTGPGEPDSLR	LDFTGPGEPDSLR	2	702.347
Mouse	P11881	2 - putative	VETGEN[115]CTSPAPK	VETGEDCTSPAPK	2	695.814
Mouse	P11911	1 - high confidence	SLQSN[115]ITWPPVPLGPGQGTTGQLFFPEVNK	SLQSDITWPPVPLGPGQGTTGQLFFPEVNK	2	1605.83
Mouse	P11942	1 - high confidence	DGSIISPLN[115]ATK	DGSIISPLDATK	2	608.828
Mouse	P12032	2 - putative	FMGSPEIN[115]ETTLYQR	FMGSPEIDETTLYQR	2	893.922
Mouse	P12265	3 - unspecific	ITIAINN[115]TLTPH	ITIAINDTLTPH	2	654.865
Mouse	P12265	3 - unspecific	ITIAIN[115]NTLTPH	ITIAIDNTLTPH	2	654.865
Mouse	P12960	1 - high confidence	WLVN[115]SSR	WLVDSSR	2	431.728
Mouse	P12960	1 - high confidence	GKAN[115]STGTLVITN[115]PTR	GKADSTGTLVITDPTR	2	816.437
Mouse	P12960	1 - high confidence	GKAN[115]STGTLVITNPTR	GKADSTGTLVITNPTR	2	815.945
Mouse	P12960	1 - high confidence	GN[115]YSCFVSSPSITK	GDYSCFVSSPSITK	2	774.359
Mouse	P12960	1 - high confidence	GTEWLVN[115]SSR	GTEWLVDSSR	2	575.283
Mouse	P12960	1 - high confidence	LSN[115]ESTVTGYK	LSDESTVTGYK	2	600.296
Mouse	P12960	1 - high confidence	AN[115]STGTLVITNPTR	ADSTGTLVITNPTR	2	723.386
Mouse	P12960	1 - high confidence	AN[115]STGTLVITN[115]PTR	ADSTGTLVITDPTR	2	723.878
Mouse	P13379	1 - high confidence	EAPN[115]GSCVSLQQCFQK	EAPDGSCVSLQQCFQK	2	927.414
Mouse	P13379	1 - high confidence	WEAPN[115]GSCVSLQQCFQK	WEAPDGSCVSLQQCFQK	2	1020.45
Mouse	P13504	1 - high confidence	YTLITTLN[115]ISEVK	YTLITTLDISEVK	2	748.419
Mouse	P13504	1 - high confidence	PLLLDN[115]VSFFGVK	PLLLDDVSFFGVK	2	725.406
Mouse	P13595	1 - high confidence	IYNTPSASYLEVTPDSENDFGNYN[115]CT	IYNTPSASYLEVTPDSENDFGNYDCT	2	1486.63
Mouse	P13595	1 - high confidence	IYNTPSASYLEVTPDSEN[115]DFGNYN[115]CTAVNR	IYNTPSASYLEVTPDSEDDFGNYDCTAVNR	2	1707.24
Mouse	P13595	1 - high confidence	QLLPSSN[115]YSNIK	QLLPSSDYSNIK	2	682.859
Mouse	P13595	1 - high confidence	LPSSN[115]YSNIK	LPSSDYSNIK	2	562.288
Mouse	P13595	1 - high confidence	EVTPDSENDFGNYN[115]CTAVNR	EVTPDSENDFGNYDCTAVNR	2	1151.98
Mouse	P13595	1 - high confidence	ITYVEN[115]QTAMELEE	ITYVEDQTAMELEE	2	835.88
Mouse	P13595	1 - high confidence	TPDSENDFGNYN[115]CTAVNR	TPDSENDFGNYDCTAVNR	2	1037.93
Mouse	P13595	1 - high confidence	TPSASYLEVTPDSENDFGNYN[115]CTAVNR	TPSASYLEVTPDSENDFGNYDCTAVNR	2	1511.66
Mouse	P13595	1 - high confidence	IYNTPSASYLEVTPDSENDFGN[115]YNCTAVNR	IYNTPSASYLEVTPDSENDFGDYNCTAVNR	2	1706.75
Mouse	P13595	1 - high confidence	N[115]DFGNYN[115]CTAVNR	DDFGNYDCTAVNR	2	773.818
Mouse	P13595	1 - high confidence	NDFGN[115]YN[115]CTAVNR	NDFGDYDCTAVNR	2	773.818
Mouse	P13595	1 - high confidence	PDSEN[115]DFGNYN[115]CTAVNR	PDSEDDFGNYDCTAVNR	2	987.895
Mouse	P13595	1 - high confidence	YLEVTPDSENDFGN[115]YNCTAVNR	YLEVTPDSENDFGDYNCTAVNR	2	1290.06
Mouse	P13595	1 - high confidence	ASYLEVTPDSENDFGNYN[115]CTAVNR	ASYLEVTPDSENDFGNYDCTAVNR	2	1369.09
Mouse	P13595	1 - high confidence	PSASYLEVTPDSENDFGNYN[115]CTAVNR	PSASYLEVTPDSENDFGNYDCTAVNR	2	1461.13
Mouse	P13595	1 - high confidence	SENDFGNYN[115]CTAVNR	SENDFGNYDCTAVNR	2	881.363
Mouse	P13595	1 - high confidence	SYLEVTPDSEN[115]DFGN[115]YNCTAVNR	SYLEVTPDSEDDFGDYNCTAVNR	2	1334.06
Mouse	P13595	1 - high confidence	PDSENDFGNYN[115]CTAVNR	PDSENDFGNYDCTAVNR	2	987.403
Mouse	P13595	1 - high confidence	FGNYN[115]CTAVNR	FGNYDCTAVNR	2	658.791
Mouse	P13595	1 - high confidence	YN[115]CTAVNR	YDCTAVNR	2	499.725
Mouse	P13595	1 - high confidence	GQLLPSSNYSN[115]IK	GQLLPSSNYSDIK	2	711.37
Mouse	P13595	1 - high confidence	VTPDSEN[115]DFGNYN[115]CTAVNR	VTPDSEDDFGNYDCTAVNR	2	1087.95
Mouse	P13595	1 - high confidence	PSSN[115]YSNIK	PSSDYSNIK	2	505.746
Mouse	P13595	1 - high confidence	TSTRN[115]ISSEEKTLDGHMVVR	TSTRDISSEEKTLDGHMVVR	2	1131.07
Mouse	P13595	1 - high confidence	VTPDSENDFGN[115]YN[115]CTAVNR	VTPDSENDFGDYDCTAVNR	2	1087.95
Mouse	P13595	1 - high confidence	NDFGNYN[115]CTAVNR	NDFGNYDCTAVNR	2	773.326
Mouse	P13595	1 - high confidence	DFGNYN[115]CTAVNR	DFGNYDCTAVNR	2	716.305
Mouse	P13595	1 - high confidence	IYNTPSASYLEVTPDSENDFGN[115]YN[115]CTAVNR	IYNTPSASYLEVTPDSENDFGDYDCTAVNR	2	1707.24
Mouse	P13595	1 - high confidence	LEVTPDSENDFGNYN[115]CTAVNR	LEVTPDSENDFGNYDCTAVNR	2	1208.52
Mouse	P13595	1 - high confidence	VTPDSENDFGNYN[115]CTAVNR	VTPDSENDFGNYDCTAVNR	2	1087.46
Mouse	P13595	1 - high confidence	YLEVTPDSENDFGNYN[115]CTAVNR	YLEVTPDSENDFGNYDCTAVNR	2	1290.06
Mouse	P13595	1 - high confidence	SYLEVTPDSENDFGNYN[115]CTAVNR	SYLEVTPDSENDFGNYDCTAVNR	2	1333.57
Mouse	P13595	1 - high confidence	TSTRN[115]ISSEEK	TSTRDISSEEK	2	626.807
Mouse	P13595	1 - high confidence	ITYVEN[115]QTAME	ITYVEDQTAME	2	650.295
Mouse	P13595	1 - high confidence	ITYVEN[115]QTAMELE	ITYVEDQTAMELE	2	771.359
Mouse	P13595	1 - high confidence	GQLLPSSN[115]YSNIK	GQLLPSSDYSNIK	2	711.37
Mouse	P13595	1 - high confidence	QSIVN[115]ATANLGQ	QSIVDATANLGQ	2	608.815
Mouse	P13595	1 - high confidence	DGQLLPSSN[115]YSN[115]IK	DGQLLPSSDYSDIK	2	769.376
Mouse	P13595	1 - high confidence	DGQLLPSSNYSN[115]IK	DGQLLPSSNYSDIK	2	768.884
Mouse	P13595	1 - high confidence	DGQLLPSSN[115]YSN	DGQLLPSSDYSN	2	648.294
Mouse	P13595	1 - high confidence	IYNTPSASYLEVTPDSENDFGNYN[115]CTAVNR	IYNTPSASYLEVTPDSENDFGNYDCTAVNR	2	1706.75
Mouse	P13595	1 - high confidence	DGQLLPSSN[115]YSNIK	DGQLLPSSDYSNIK	2	768.884
Mouse	P13597	1 - high confidence	SSHGN[115]VTR	SSHGDVTR	2	429.71
Mouse	P13597	1 - high confidence	GSVQVN[115]CSSSCK	GSVQVDCSSSCK	2	657.28
Mouse	P13597	1 - high confidence	QEMN[115]GTYVCHAF	QEMDGTYVCHAF	2	729.298
Mouse	P13597	1 - high confidence	GDHGAN[115]FSC	GDHGADFSC	2	483.178
Mouse	P13597	1 - high confidence	TLTVYN[115]FSAP	TLTVYDFSAP	2	557.28
Mouse	P13597	1 - high confidence	LRPQGLALFSN[115]VSEAR	LRPQGLALFSDVSEAR	2	879.981
Mouse	P13597	1 - high confidence	N[115]QTLELH	DQTLELH	2	428.217
Mouse	P13597	1 - high confidence	VQFTLN[115]ASSEDHKR	VQFTLDASSEDHKR	2	816.905
Mouse	P13597	1 - high confidence	LPQGGSVQVN[115]CSSSCK	LPQGGSVQVDCSSSCK	2	854.888
Mouse	P13597	1 - high confidence	PQGGSVQVN[115]CSSSCK	PQGGSVQVDCSSSCK	2	798.346
Mouse	P13597	1 - high confidence	SVKQEMN[115]GTYVCHAFSSHGN[115]VTR	SVKQEMDGTYVCHAFSSHGDVTR	2	1306.09
Mouse	P13597	1 - high confidence	FLFKN[115]QTLELHVLYGPR	FLFKDQTLELHVLYGPR	2	1038.57
Mouse	P13597	1 - high confidence	SVQVN[115]CSSSCK	SVQVDCSSSCK	2	628.769
Mouse	P13597	1 - high confidence	TLTVYN[115]FSAPVL	TLTVYDFSAPVL	2	663.356
Mouse	P13597	1 - high confidence	IYLELGGQMPTQESTN[115]SSDSVSAT	IYLELGGQMPTQESTDSSDSVSAT	2	1258.57
Mouse	P13597	1 - high confidence	GGSVQVN[115]CSSSCK	GGSVQVDCSSSCK	2	685.79
Mouse	P13597	1 - high confidence	DHGAN[115]FSCR	DHGADFSCR	2	532.717
Mouse	P13597	1 - high confidence	LN[115]ASSEDHKR	LDASSEDHKR	2	579.284
Mouse	P13597	1 - high confidence	VVLLSGVEPRPPTPQVQFTLN[115]ASSEDHK	VVLLSGVEPRPPTPQVQFTLDASSEDHK	2	1523.8
Mouse	P13597	1 - high confidence	LDLRPQGLALFSN[115]VSEAR	LDLRPQGLALFSDVSEAR	2	994.037
Mouse	P13597	1 - high confidence	HGAN[115]FSCR	HGADFSCR	2	475.204
Mouse	P13597	1 - high confidence	DLRPQGLALFSN[115]VSEAR	DLRPQGLALFSDVSEAR	2	937.495
Mouse	P13597	1 - high confidence	TLTVYN[115]FSAPVLTLSQLEVSEGSQVTVK	TLTVYDFSAPVLTLSQLEVSEGSQVTVK	2	1506.3
Mouse	P13597	1 - high confidence	FSSHGN[115]VTR	FSSHGDVTR	2	503.244
Mouse	P13597	1 - high confidence	TLN[115]ASSEDHK	TLDASSEDHK	2	551.757
Mouse	P13597	1 - high confidence	FTLN[115]ASSEDHK	FTLDASSEDHK	2	625.291
Mouse	P13597	1 - high confidence	N[115]ASSEDHKR	DASSEDHKR	2	522.742
Mouse	P13597	1 - high confidence	HAFSSHGN[115]VTR	HAFSSHGDVTR	2	607.292
Mouse	P13597	1 - high confidence	N[115]QTLELHVLY	DQTLELHVLY	2	615.825
Mouse	P13597	1 - high confidence	VVLLSGVEPRPPTPQVQFTLN[115]ASSEDHKR	VVLLSGVEPRPPTPQVQFTLDASSEDHKR	2	1601.85
Mouse	P13597	1 - high confidence	FTLN[115]ASSEDHKR	FTLDASSEDHKR	2	703.342
Mouse	P13597	1 - high confidence	PPTPQVQFTLN[115]ASSEDHK	PPTPQVQFTLDASSEDHK	2	998.987
Mouse	P13597	1 - high confidence	TLN[115]ASSEDHKR	TLDASSEDHKR	2	629.808
Mouse	P13597	1 - high confidence	LFSN[115]VSEAR	LFSDVSEAR	2	512.262
Mouse	P13597	1 - high confidence	VQFTLN[115]ASSEDHK	VQFTLDASSEDHK	2	738.855
Mouse	P13597	1 - high confidence	LALFSN[115]VSEAR	LALFSDVSEAR	2	604.323
Mouse	P13597	1 - high confidence	N[115]QTLELHVL	DQTLELHVL	2	534.293
Mouse	P13597	1 - high confidence	PQGLALFSN[115]VSEAR	PQGLALFSDVSEAR	2	745.389
Mouse	P13597	1 - high confidence	AFSSHGN[115]VTR	AFSSHGDVTR	2	538.763
Mouse	P13597	1 - high confidence	QEMNGTYVCHAFSSHGN[115]VTR	QEMNGTYVCHAFSSHGDVTR	2	1148.5
Mouse	P13597	1 - high confidence	QEMN[115]GTYVCHAFSSHGN[115]VTR	QEMDGTYVCHAFSSHGDVTR	2	1148.99
Mouse	P13597	1 - high confidence	GLALFSN[115]VSEAR	GLALFSDVSEAR	2	632.833
Mouse	P13597	1 - high confidence	N[115]QTLELHVLYGPR	DQTLELHVLYGPR	2	770.913
Mouse	P13597	1 - high confidence	LDETDCLGN[115]WTWQEGSQQTLK	LDETDCLGDWTWQEGSQQTLK	2	1255.56
Mouse	P13597	1 - high confidence	FSN[115]VSEAR	FSDVSEAR	2	455.72
Mouse	P13597	1 - high confidence	GDHGAN[115]FSCR	GDHGADFSCR	2	561.228
Mouse	P13597	1 - high confidence	TELDLRPQGLALFSN[115]VSEAR	TELDLRPQGLALFSDVSEAR	2	1109.08
Mouse	P13597	1 - high confidence	EAFLPQGGSVQVN[115]CSSSCK	EAFLPQGGSVQVDCSSSCK	2	1028.46
Mouse	P13597	1 - high confidence	ALFSN[115]VSEAR	ALFSDVSEAR	2	547.78
Mouse	P13808	1 - high confidence	PDN[115]SSASGQSGQEKPR	PDDSSASGQSGQEKPR	2	823.377
Mouse	P14094	1 - high confidence	VLGFKPKPPKN[115]ESLE	VLGFKPKPPKDESLE	2	842.472
Mouse	P14094	1 - high confidence	GFKPKPPKN[115]ESLETYPLMMK	GFKPKPPKDESLETYPLMMK	2	1168.61
Mouse	P14094	1 - high confidence	N[115]CSGLN[115]DDSYGYR	DCSGLDDDSYGYR	2	761.794
Mouse	P14094	1 - high confidence	YLQPLLAVQFTN[115]LTVDTEIR	YLQPLLAVQFTDLTVDTEIR	2	1168.13
Mouse	P14094	1 - high confidence	LDWLGN[115]CSGLN	LDWLGDCSGLN	2	625.283
Mouse	P14094	1 - high confidence	FKLDWLGN[115]CSGLN[115]DDSYGYR	FKLDWLGDCSGLDDDSYGYR	2	1191.52
Mouse	P14094	1 - high confidence	N[115]CSGLNDDSYGYR	DCSGLNDDSYGYR	2	761.302
Mouse	P14094	1 - high confidence	LGN[115]CSGLNDDSYGYR	LGDCSGLNDDSYGYR	2	846.355
Mouse	P14094	1 - high confidence	N[115]LTVDTEIR	DLTVDTEIR	2	531.28
Mouse	P14094	1 - high confidence	FKLDWLGN[115]CSGLNDDSYGYR	FKLDWLGDCSGLNDDSYGYR	2	1191.03
Mouse	P14094	1 - high confidence	N[115]ESLETYPLMMK	DESLETYPLMMK	2	728.842
Mouse	P14094	1 - high confidence	VQFTN[115]LTVDTEIR	VQFTDLTVDTEIR	2	768.902
Mouse	P14094	1 - high confidence	PPKN[115]ESLETYPLMMK	PPKDESLETYPLMMK	2	889.942
Mouse	P14094	1 - high confidence	AVQFTN[115]LTVDTEIR	AVQFTDLTVDTEIR	2	804.42
Mouse	P14094	1 - high confidence	LDWLGN[115]CSGLN[115]DDSYGYR	LDWLGDCSGLDDDSYGYR	2	1053.94
Mouse	P14094	1 - high confidence	VLGFKPKPPKN[115]ESLETYPLMMK	VLGFKPKPPKDESLETYPLMMK	2	1274.68
Mouse	P14094	1 - high confidence	FTN[115]LTVDTEIR	FTDLTVDTEIR	2	655.338
Mouse	P14094	1 - high confidence	TN[115]LTVDTEIR	TDLTVDTEIR	2	581.804
Mouse	P14094	1 - high confidence	LDWLGN[115]CSGLNDDSYGYR	LDWLGDCSGLNDDSYGYR	2	1053.45
Mouse	P14094	1 - high confidence	PKPPKN[115]ESLETYPLMMK	PKPPKDESLETYPLMMK	2	1002.52
Mouse	P14094	1 - high confidence	LAVQFTN[115]LTVDTEIR	LAVQFTDLTVDTEIR	2	860.962
Mouse	P14115	3 - unspecific	N[115]QSFCPTVNLDK	DQSFCPTVNLDK	2	712.333
Mouse	P14142	2 - putative	VIEQSYN[115]ATWLGR	VIEQSYDATWLGR	2	769.389
Mouse	P14231	1 - high confidence	FLEPYN[115]DSIQAQKNDVCRPGR	FLEPYDDSIQAQKNDVCRPGR	2	1254.6
Mouse	P14231	1 - high confidence	N[115]DSIQAQK	DDSIQAQK	2	452.725
Mouse	P14231	1 - high confidence	MN[115]VTCVGK	MDVTCVGK	2	455.215
Mouse	P14231	1 - high confidence	QSMN[115]VTCVGK	QSMDVTCVGK	2	562.76
Mouse	P14231	1 - high confidence	FHVN[115]YTQPLVA	FHVDYTQPLVA	2	645.333
Mouse	P14231	1 - high confidence	FHVN[115]YTQPL	FHVDYTQPL	2	560.28
Mouse	P14231	1 - high confidence	EPYN[115]DSIQAQK	EPYDDSIQAQK	2	647.305
Mouse	P14231	1 - high confidence	DEDAENLGHFVMFPAN[115]GSIDL	DEDAENLGHFVMFPADGSIDL	2	1146.51
Mouse	P14231	1 - high confidence	YAGANQSMN[115]VTCVGK	YAGANQSMDVTCVGK	2	800.861
Mouse	P14231	1 - high confidence	FLN[115]VTPNVEVN[115]VECR	FLDVTPNVEVDVECR	2	896.436
Mouse	P14231	1 - high confidence	FLNVTPN[115]VEVNVECR	FLNVTPDVEVNVECR	2	895.944
Mouse	P14231	1 - high confidence	FYAGAN[115]QSMN[115]VTCVGK	FYAGADQSMDVTCVGK	2	874.888
Mouse	P14231	1 - high confidence	VIN[115]FYAGANQSMN[115]VTCVGK	VIDFYAGANQSMDVTCVGK	2	1037.99
Mouse	P14231	1 - high confidence	LEPYN[115]DSIQAQK	LEPYDDSIQAQK	2	703.847
Mouse	P14231	1 - high confidence	LNKFLEPYN[115]DSIQAQK	LNKFLEPYDDSIQAQK	2	954.992
Mouse	P14231	1 - high confidence	DEDAENLGHFVMFPAN[115]GSIDLM	DEDAENLGHFVMFPADGSIDLM	2	1212.03
Mouse	P14231	1 - high confidence	RDEDAENLGHFVMFPAN[115]GSIDLM	RDEDAENLGHFVMFPADGSIDLM	2	1290.08
Mouse	P14231	1 - high confidence	TENLDVIVN[115]ISDTESWGQHVQK	TENLDVIVDISDTESWGQHVQK	2	1257.11
Mouse	P14231	1 - high confidence	YAGAN[115]QSMN[115]VTCVGK	YAGADQSMDVTCVGK	2	801.353
Mouse	P14231	1 - high confidence	PYN[115]DSIQAQK	PYDDSIQAQK	2	582.783
Mouse	P14231	1 - high confidence	KFHVN[115]YTQPLVAVK	KFHVDYTQPLVAVK	2	822.962
Mouse	P14231	1 - high confidence	VIN[115]FYAGAN[115]QSMN[115]VTCVGK	VIDFYAGADQSMDVTCVGK	2	1038.48
Mouse	P14231	1 - high confidence	AGANQSMN[115]VTCVGK	AGANQSMDVTCVGK	2	719.33
Mouse	P14231	1 - high confidence	VINFYAGANQSMN[115]VTCVGK	VINFYAGANQSMDVTCVGK	2	1037.49
Mouse	P14231	1 - high confidence	AGAN[115]QSMN[115]VTCVGK	AGADQSMDVTCVGK	2	719.822
Mouse	P14231	1 - high confidence	FLN[115]VTPNVEVNVECR	FLDVTPNVEVNVECR	2	895.944
Mouse	P14231	1 - high confidence	FHVN[115]YTQPLVAVK	FHVDYTQPLVAVK	2	758.915
Mouse	P14231	1 - high confidence	VINFYAGAN[115]QSMN[115]VTCVGK	VINFYAGADQSMDVTCVGK	2	1037.99
Mouse	P14231	1 - high confidence	FLEPYN[115]DSIQAQK	FLEPYDDSIQAQK	2	777.381
Mouse	P14426	1 - high confidence	N[115]QSEGGSHTIQR	DQSEGGSHTIQR	2	657.808
Mouse	P14426	1 - high confidence	YLELGN[115]ATLLHTDSPK	YLELGDATLLHTDSPK	2	886.96
Mouse	P14426	1 - high confidence	YYN[115]QSEGGSHTIQR	YYDQSEGGSHTIQR	2	820.872
Mouse	P14429	1 - high confidence	AQSYYN[115]QSK	AQSYYDQSK	2	545.249
Mouse	P14429	1 - high confidence	EQN[115]YTCHVNHEGLPEPL	EQDYTCHVNHEGLPEPL	2	1019.46
Mouse	P14429	1 - high confidence	EQNYTCHVN[115]HEGLPEPLTLR	EQNYTCHVDHEGLPEPLTLR	2	1204.57
Mouse	P14429	1 - high confidence	EQN[115]YTCHVNHEGLPEPLTLR	EQDYTCHVNHEGLPEPLTLR	2	1204.57
Mouse	P14429	1 - high confidence	QSYYN[115]QSK	QSYYDQSK	2	509.73
Mouse	P14429	1 - high confidence	TAQSYYN[115]QSK	TAQSYYDQSK	2	595.773
Mouse	P15089	3 - unspecific	NQN[115]STCIGTDLNR	NQDSTCIGTDLNR	2	747.339
Mouse	P15116	1 - high confidence	SDRDKN[115]LSLR	SDRDKDLSLR	2	602.821
Mouse	P15116	1 - high confidence	VDVIVANLTVTDKDQPHTPAWN[115]AAYR	VDVIVANLTVTDKDQPHTPAWDAAYR	2	1448.24
Mouse	P15116	1 - high confidence	MFTINN[115]ETGDIITVAAGLDR	MFTINDETGDIITVAAGLDR	2	1076.54
Mouse	P15116	1 - high confidence	VDVIVAN[115]LTVTDKDQPHTPAWNAAYR	VDVIVADLTVTDKDQPHTPAWNAAYR	2	1448.24
Mouse	P15116	1 - high confidence	VCQCDSN[115]GDCTDVDR	VCQCDSDGDCTDVDR	2	901.328
Mouse	P15116	1 - high confidence	VKVCQCDSN[115]GDCTDVDR	VKVCQCDSDGDCTDVDR	2	1014.91
Mouse	P15116	1 - high confidence	TIN[115]N[115]ETGDIITVAAGLDR	TIDDETGDIITVAAGLDR	2	937.974
Mouse	P15116	1 - high confidence	TIN[115]NETGDIITVAAGLDR	TIDNETGDIITVAAGLDR	2	937.482
Mouse	P15116	1 - high confidence	RN[115]WTINR	RDWTINR	2	480.757
Mouse	P15116	1 - high confidence	TINN[115]ETGDIITVAAGLDR	TINDETGDIITVAAGLDR	2	937.482
Mouse	P15116	1 - high confidence	SN[115]ISILR	SDISILR	2	402.238
Mouse	P15116	1 - high confidence	VDVIVAN[115]LTVTDK	VDVIVADLTVTDK	2	694.391
Mouse	P15208	1 - high confidence	SPGN[115]YSVR	SPGDYSVR	2	440.715
Mouse	P15208	1 - high confidence	TWSPPFESDDSQKHN[115]QSEYDDSASECCSCPK	TWSPPFESDDSQKHDQSEYDDSASECCSCPK	2	1840.21
Mouse	P15208	1 - high confidence	ELGLYNLMN[115]ITR	ELGLYNLMDITR	2	719.377
Mouse	P15208	1 - high confidence	HN[115]QSEYDDSASECCSCPK	HDQSEYDDSASECCSCPK	2	1087.89
Mouse	P15208	1 - high confidence	WKPPSDPN[115]GN[115]ITHY	WKPPSDPDGDITHY	2	814.376
Mouse	P15208	1 - high confidence	GETLEIGN[115]YSFYALDNQNLR	GETLEIGDYSFYALDNQNLR	2	1159.55
Mouse	P15208	1 - high confidence	WKPPSDPNGN[115]ITHY	WKPPSDPNGDITHY	2	813.884
Mouse	P15208	1 - high confidence	ECLGN[115]CSEPDDPTK	ECLGDCSEPDDPTK	2	811.822
Mouse	P15208	1 - high confidence	GLSPGN[115]YSVR	GLSPGDYSVR	2	525.767
Mouse	P15208	1 - high confidence	HN[115]LTITQGK	HDLTITQGK	2	506.778
Mouse	P15209	1 - high confidence	TN[115]ISSDDSGK	TDISSDDSGK	2	512.728
Mouse	P15209	1 - high confidence	IHVTN[115]HTEYH	IHVTDHTEYH	2	626.294
Mouse	P15209	1 - high confidence	IHVTN[115]HTEYHGCLQLDNPTHMNN[115]GDYTLMAK	IHVTDHTEYHGCLQLDNPTHMNDGDYTLMAK	2	1813.81
Mouse	P15209	1 - high confidence	LEPN[115]SVDPEN[115]ITEIL	LEPDSVDPEDITEIL	2	842.915
Mouse	P15209	1 - high confidence	LEPN[115]SVDPENITEILIANQK	LEPDSVDPENITEILIANQK	2	1119.58
Mouse	P15209	1 - high confidence	LEPNSVDPEN[115]ITEIL	LEPNSVDPEDITEIL	2	842.423
Mouse	P15209	1 - high confidence	IHVTN[115]HTEYHGCLQLDN[115]PTHMNNGDYTLMAK	IHVTDHTEYHGCLQLDDPTHMNNGDYTLMAK	2	1813.81
Mouse	P15209	1 - high confidence	SVDPEN[115]ITEILIAN[115]QK	SVDPEDITEILIADQK	2	893.462
Mouse	P15209	1 - high confidence	LEPNSVDPEN[115]ITEILIAN	LEPNSVDPEDITEILIAN	2	991.505
Mouse	P15209	1 - high confidence	PN[115]LTVEEGK	PDLTVEEGK	2	494.256
Mouse	P15209	1 - high confidence	LEPNSVDPEN[115]ITEILIAN[115]QK	LEPNSVDPEDITEILIADQK	2	1120.07
Mouse	P15209	1 - high confidence	APN[115]LTVEEGK	APDLTVEEGK	2	529.775
Mouse	P15209	1 - high confidence	IHVTN[115]HTEYHG	IHVTDHTEYHG	2	654.805
Mouse	P15209	1 - high confidence	IHVTN[115]HTEYHGC	IHVTDHTEYHGC	2	734.82
Mouse	P15209	1 - high confidence	YNGAILN[115]ESK	YNGAILDESK	2	555.28
Mouse	P15209	1 - high confidence	IHVTN[115]HTEY	IHVTDHTEY	2	557.765
Mouse	P15209	1 - high confidence	LEPN[115]SVDPEN[115]ITEILIANQK	LEPDSVDPEDITEILIANQK	2	1120.07
Mouse	P15209	1 - high confidence	YN[115]GAILN[115]ESK	YDGAILDESK	2	555.772
Mouse	P15209	1 - high confidence	SSPDTQDLYCLN[115]ESSK	SSPDTQDLYCLDESSK	2	922.899
Mouse	P15209	1 - high confidence	PALQWFYN[115]GAILN[115]ESK	PALQWFYDGAILDESK	2	926.962
Mouse	P15209	1 - high confidence	N[115]LTIVDSGLK	DLTIVDSGLK	2	530.801
Mouse	P15209	1 - high confidence	PALQWFYNGAILN[115]ESK	PALQWFYNGAILDESK	2	926.47
Mouse	P15209	1 - high confidence	SVDPEN[115]ITEILIANQK	SVDPEDITEILIANQK	2	892.97
Mouse	P15209	1 - high confidence	LEPNSVDPEN[115]ITEILIANQK	LEPNSVDPEDITEILIANQK	2	1119.58
Mouse	P15209	1 - high confidence	HMN[115]ETSHTQGSLR	HMDETSHTQGSLR	2	749.842
Mouse	P15209	1 - high confidence	LAAPN[115]LTVEEGK	LAAPDLTVEEGK	2	621.835
Mouse	P15209	1 - high confidence	ITN[115]ISSDDSGK	ITDISSDDSGK	2	569.27
Mouse	P15306	1 - high confidence	GFQWVTGDN[115]HTSYSR	GFQWVTGDDHTSYSR	2	878.393
Mouse	P15306	1 - high confidence	GFQWVTGDN[115]HTSY	GFQWVTGDDHTSY	2	756.826
Mouse	P15379	1 - high confidence	TEAADLCQAFN[115]STLPT	TEAADLCQAFDSTLPT	2	870.396
Mouse	P15379	1 - high confidence	IHPNAICAAN[115]HT	IHPNAICAADHT	2	660.315
Mouse	P15379	1 - high confidence	N[115]STLPTMDQMK	DSTLPTMDQMK	2	633.792
Mouse	P15379	1 - high confidence	TEAADLCQAFN[115]STLPTMD	TEAADLCQAFDSTLPTMD	2	993.43
Mouse	P15379	1 - high confidence	CQAFN[115]STLPTMDQMK	CQAFDSTLPTMDQMK	2	886.889
Mouse	P15379	1 - high confidence	IHPNAICAAN[115]HTG	IHPNAICAADHTG	2	688.825
Mouse	P15379	1 - high confidence	IHPNAICAAN[115]HTGVYIL	IHPNAICAADHTGVYIL	2	932.975
Mouse	P15379	1 - high confidence	QAFN[115]STLPTMDQMK	QAFDSTLPTMDQMK	2	806.874
Mouse	P15379	1 - high confidence	AFN[115]STLPTMDQMK	AFDSTLPTMDQMK	2	742.845
Mouse	P15379	1 - high confidence	QQIDLN[115]VTCR	QQIDLDVTCR	2	624.309
Mouse	P15379	1 - high confidence	IHPN[115]AICAAN[115]HTGVY	IHPDAICAADHTGVY	2	820.383
Mouse	P15379	1 - high confidence	IHPNAICAAN[115]HTGVY	IHPNAICAADHTGVY	2	819.891
Mouse	P15379	1 - high confidence	HQQIDLN[115]VTCR	HQQIDLDVTCR	2	692.839
Mouse	P15379	1 - high confidence	TEAADLCQAFN[115]STLPTMDQMK	TEAADLCQAFDSTLPTMDQMK	2	1187.03
Mouse	P15530	1 - high confidence	TN[115]HSGALTWFR	TDHSGALTWFR	2	645.818
Mouse	P15530	1 - high confidence	IVQTQN[115]GSVY	IVQTQDGSVY	2	555.28
Mouse	P15864	3 - unspecific	ALAAAGYDVEKN[115]NSR	ALAAAGYDVEKDNSR	2	790.392
Mouse	P15920	1 - high confidence	MVLWN[115]DSTIR	MVLWDDSTIR	2	618.311
Mouse	P16056	1 - high confidence	AQSKPDSAEPVN[115]R	AQSKPDSAEPVDR	2	700.347
Mouse	P16056	1 - high confidence	VGN[115]QSCESLHWH	VGDQSCESLHWH	2	727.813
Mouse	P16056	1 - high confidence	YQLPN[115]FTAETPIQNVVLH	YQLPDFTAETPIQNVVLH	2	1043.04
Mouse	P16056	1 - high confidence	VGN[115]QSCESLH	VGDQSCESLH	2	566.243
Mouse	P16056	1 - high confidence	SKPDSAEPVN[115]R	SKPDSAEPVDR	2	600.799
Mouse	P16092	1 - high confidence	SPHRPILQAGLPAN[115]K	SPHRPILQAGLPADK	2	800.455
Mouse	P16092	1 - high confidence	PHRPILQAGLPAN[115]K	PHRPILQAGLPADK	2	756.939
Mouse	P16092	1 - high confidence	TAGVN[115]TTDK	TAGVDTTDK	2	454.225
Mouse	P16092	1 - high confidence	PILQAGLPAN[115]K	PILQAGLPADK	2	561.833
Mouse	P16092	1 - high confidence	TAGVN[115]TTDKEMEVLHLR	TAGVDTTDKEMEVLHLR	2	957.986
Mouse	P16092	1 - high confidence	DGVQLVESN[115]R	DGVQLVESDR	2	559.281
Mouse	P16092	1 - high confidence	HIEVN[115]GSK	HIEVDGSK	2	442.73
Mouse	P16305	1 - high confidence	SIAHN[115]MTTPNK	SIAHDMTTPNK	2	607.798
Mouse	P16381	3 - unspecific	VGSTSEN[115]ITQK	VGSTSEDITQK	2	582.794
Mouse	P16382	1 - high confidence	EDNPAEFIVYN[115]VTYK	EDNPAEFIVYDVTYK	2	901.931
Mouse	P16406	1 - high confidence	LN[115]AN[115]LSGDAFLK	LDADLSGDAFLK	2	632.828
Mouse	P16406	1 - high confidence	IALN[115]LTMYLK	IALDLTMYLK	2	590.839
Mouse	P16406	1 - high confidence	EALGN[115]ASQLFDSWLK	EALGDASQLFDSWLK	2	840.42
Mouse	P16675	3 - unspecific	MYVTN[115]DTEVAENNYEALK	MYVTDDTEVAENNYEALK	2	1052.98
Mouse	P16858	3 - unspecific	PN[115]VSVVDLTCR	PDVSVVDLTCR	2	630.819
Mouse	P16858	3 - unspecific	YDN[115]EYGYSNR	YDDEYGYSNR	2	641.258
Mouse	P16858	3 - unspecific	PTPN[115]VSVVDLTCR	PTPDVSVVDLTCR	2	729.87
Mouse	P16858	3 - unspecific	VPTPN[115]VSVVDLTCR	VPTPDVSVVDLTCR	2	779.404
Mouse	P16858	3 - unspecific	IVSN[115]ASCTTNCLAPLAK	IVSDASCTTNCLAPLAK	2	910.951
Mouse	P16858	3 - unspecific	TPN[115]VSVVDLTCR	TPDVSVVDLTCR	2	681.343
Mouse	P16858	3 - unspecific	VGVN[115]GFGR	VGVDGFGR	2	403.714
Mouse	P16858	3 - unspecific	LVIN[115]GKPITIFQER	LVIDGKPITIFQER	2	814.975
Mouse	P16872	1 - high confidence	GESN[115]WTHVSLFHTR	GESDWTHVSLFHTR	2	836.4
Mouse	P16872	1 - high confidence	GESN[115]WTHVSLF	GESDWTHVSLF	2	639.296
Mouse	P17047	1 - high confidence	MYLAN[115]GSAFN[115]ISN[115]K	MYLADGSAFDISDK	2	766.854
Mouse	P17047	1 - high confidence	NVYMYLAN[115]GSAFN[115]ISNK	NVYMYLADGSAFDISNK	2	954.449
Mouse	P17047	1 - high confidence	VPFIFNINPATTN[115]FTGSCQPQSAQLR	VPFIFNINPATTDFTGSCQPQSAQLR	2	1455.22
Mouse	P17047	1 - high confidence	SVLTYN[115]LTPVVQK	SVLTYDLTPVVQK	2	731.914
Mouse	P17047	1 - high confidence	CNSVLTYN[115]LTPVVQK	CNSVLTYDLTPVVQK	2	868.951
Mouse	P17047	1 - high confidence	GLQLN[115]ITEEK	GLQLDITEEK	2	573.309
Mouse	P17047	1 - high confidence	TTN[115]FTGSCQPQSAQLR	TTDFTGSCQPQSAQLR	2	898.918
Mouse	P17047	1 - high confidence	YLAN[115]GSAFN[115]ISNK	YLADGSAFDISNK	2	700.841
Mouse	P17047	1 - high confidence	MGLQLN[115]ITEEK	MGLQLDITEEK	2	638.829
Mouse	P17047	1 - high confidence	LN[115]NSQIK	LDNSQIK	2	409.227
Mouse	P17047	1 - high confidence	LIVN[115]LTDSK	LIVDLTDSK	2	502.29
Mouse	P17047	1 - high confidence	MYLAN[115]GSAFN[115]ISNK	MYLADGSAFDISNK	2	766.362
Mouse	P17047	1 - high confidence	LAN[115]GSAFN[115]ISNK	LADGSAFDISNK	2	619.31
Mouse	P17182	1 - high confidence	FDSRGN[115]PTVEVDLYTAK	FDSRGDPTVEVDLYTAK	2	956.971
Mouse	P17182	1 - high confidence	LMIEMDGTEN[115]K	LMIEMDGTEDK	2	641.292
Mouse	P17182	1 - high confidence	GVSQAVEHIN[115]K	GVSQAVEHIDK	2	591.812
Mouse	P17439	2 - putative	PALAN[115]SSHDVK	PALADSSHDVK	2	570.291
Mouse	P17439	2 - putative	GPALAN[115]SSHDVK	GPALADSSHDVK	2	598.802
Mouse	P17439	2 - putative	MELSVGAIQAN[115]R	MELSVGAIQADR	2	645.333
Mouse	P17439	2 - putative	DLGPALAN[115]SSHDVK	DLGPALADSSHDVK	2	712.857
Mouse	P17809	1 - high confidence	VIEEFYNQTWN[115]	VIEEFYNQTWD	2	722.328
Mouse	P17809	1 - high confidence	VIEEFYN[115]QTWN[115]H	VIEEFYDQTWDH	2	791.349
Mouse	P17809	1 - high confidence	IEEFYNQTWN[115]HR	IEEFYNQTWDHR	2	819.374
Mouse	P17809	1 - high confidence	VIEEFYN[115]QTWN[115]	VIEEFYDQTWD	2	722.82
Mouse	P17809	1 - high confidence	N[115]QTWN[115]HR	DQTWDHR	2	479.215
Mouse	P17809	1 - high confidence	KVIEEFYN[115]QTWNHR	KVIEEFYDQTWNHR	2	932.955
Mouse	P17809	1 - high confidence	KVIEEFYN[115]QTWN[115]HR	KVIEEFYDQTWDHR	2	933.447
Mouse	P17809	1 - high confidence	EFYN[115]QTWN[115]HR	EFYDQTWDHR	2	698.802
Mouse	P17809	1 - high confidence	FYN[115]QTWN[115]HR	FYDQTWDHR	2	634.281
Mouse	P17809	1 - high confidence	YN[115]QTWN[115]HR	YDQTWDHR	2	560.747
Mouse	P17809	1 - high confidence	VIEEFYNQTWN[115]HR	VIEEFYNQTWDHR	2	868.908
Mouse	P17809	1 - high confidence	EEFYN[115]QTWN[115]HR	EEFYDQTWDHR	2	763.324
Mouse	P17809	1 - high confidence	VIEEFYN[115]QTWNH	VIEEFYDQTWNH	2	790.857
Mouse	P17809	1 - high confidence	IEEFYN[115]QTWN[115]HR	IEEFYDQTWDHR	2	819.866
Mouse	P17809	1 - high confidence	N[115]QTWNHR	DQTWNHR	2	478.723
Mouse	P17809	1 - high confidence	EFYN[115]QTWNHR	EFYDQTWNHR	2	698.31
Mouse	P17809	1 - high confidence	FYN[115]QTWNHR	FYDQTWNHR	2	633.789
Mouse	P17809	1 - high confidence	YN[115]QTWNHR	YDQTWNHR	2	560.255
Mouse	P17809	1 - high confidence	IEEFYN[115]QTWNHR	IEEFYDQTWNHR	2	819.374
Mouse	P17809	1 - high confidence	EEFYN[115]QTWNHR	EEFYDQTWNHR	2	762.832
Mouse	P17809	1 - high confidence	VIEEFYN[115]QTWN	VIEEFYDQTWN	2	722.328
Mouse	P17809	1 - high confidence	VIEEFYN[115]QTWN[115]HR	VIEEFYDQTWDHR	2	869.4
Mouse	P17809	1 - high confidence	VIEEFYN[115]QTWNHR	VIEEFYDQTWNHR	2	868.908
Mouse	P17918	3 - unspecific	VN[115]LTSMSK	VDLTSMSK	2	440.729
Mouse	P18181	1 - high confidence	PSIEIN[115]K	PSIEIDK	2	401.224
Mouse	P18181	1 - high confidence	STFYTCQVSNPVSSKN[115]DTVYFTLPCDLAR	STFYTCQVSNPVSSKDDTVYFTLPCDLAR	2	1686.28
Mouse	P18181	1 - high confidence	ILEYNYN[115]STKTIFESEFK	ILEYNYDSTKTIFESEFK	2	1114.05
Mouse	P18181	1 - high confidence	NQKILEYNYN[115]STK	NQKILEYNYDSTK	2	808.405
Mouse	P18181	1 - high confidence	NQKILEYNYN[115]STKTIFESEFKGR	NQKILEYNYDSTKTIFESEFKGR	2	1405.71
Mouse	P18181	1 - high confidence	IPDIN[115]ATTGSN[115]VTLK	IPDIDATTGSDVTLK	2	773.407
Mouse	P18181	1 - high confidence	IPDINATTGSN[115]VTLK	IPDINATTGSDVTLK	2	772.915
Mouse	P18181	1 - high confidence	GHSIPDINATTGSN[115]VTLK	GHSIPDINATTGSDVTLK	2	913.471
Mouse	P18181	1 - high confidence	PGYVLDLIVTPQN[115]K	PGYVLDLIVTPQDK	2	779.433
Mouse	P18181	1 - high confidence	FQGHSIPDINATTGSN[115]VTLK	FQGHSIPDINATTGSDVTLK	2	1051.03
Mouse	P18181	1 - high confidence	ITLEVFDPVPKPSIEIN[115]KTEASTDSCHLR	ITLEVFDPVPKPSIEIDKTEASTDSCHLR	2	1649.34
Mouse	P18181	1 - high confidence	ILEYNYN[115]STKTIFESEFKGR	ILEYNYDSTKTIFESEFKGR	2	1220.61
Mouse	P18181	1 - high confidence	GHSIPDIN[115]ATTGSN[115]VTLK	GHSIPDIDATTGSDVTLK	2	913.963
Mouse	P18181	1 - high confidence	PDIN[115]ATTGSN[115]VTLK	PDIDATTGSDVTLK	2	716.865
Mouse	P18181	1 - high confidence	ITLEVFDPVPKPSIEIN[115]K	ITLEVFDPVPKPSIEIDK	2	1020.57
Mouse	P18181	1 - high confidence	N[115]DTVYFTLPCDLAR	DDTVYFTLPCDLAR	2	843.399
Mouse	P18181	1 - high confidence	LEYNYN[115]STK	LEYNYDSTK	2	566.765
Mouse	P18181	1 - high confidence	GYVLDLIVTPQN[115]K	GYVLDLIVTPQDK	2	730.906
Mouse	P18181	1 - high confidence	ILEYN[115]YN[115]STK	ILEYDYDSTK	2	623.799
Mouse	P18181	1 - high confidence	FQGHSIPDIN[115]ATTGSN[115]VTLK	FQGHSIPDIDATTGSDVTLK	2	1051.53
Mouse	P18181	1 - high confidence	SPGYVLDLIVTPQN[115]K	SPGYVLDLIVTPQDK	2	822.949
Mouse	P18181	1 - high confidence	PSIEIN[115]KTEASTDSCHLR	PSIEIDKTEASTDSCHLR	2	1029.99
Mouse	P18181	1 - high confidence	VLDLIVTPQN[115]K	VLDLIVTPQDK	2	620.864
Mouse	P18181	1 - high confidence	SIPDINATTGSN[115]VTLK	SIPDINATTGSDVTLK	2	816.431
Mouse	P18181	1 - high confidence	KSPGYVLDLIVTPQN[115]K	KSPGYVLDLIVTPQDK	2	886.996
Mouse	P18181	1 - high confidence	SIPDIN[115]ATTGSN[115]VTLK	SIPDIDATTGSDVTLK	2	816.923
Mouse	P18181	1 - high confidence	ILEYNYN[115]STK	ILEYNYDSTK	2	623.307
Mouse	P18242	3 - unspecific	YYHGELSYLN[115]VTR	YYHGELSYLDVTR	2	808.394
Mouse	P18337	1 - high confidence	MWTWVGTN[115]K	MWTWVGTDK	2	562.269
Mouse	P18337	1 - high confidence	KQN[115]YTDLVAIQNK	KQDYTDLVAIQNK	2	768.41
Mouse	P18337	1 - high confidence	CAFN[115]CSEGR	CAFDCSEGR	2	551.211
Mouse	P18337	1 - high confidence	QN[115]YTDLVAIQNK	QDYTDLVAIQNK	2	704.362
Mouse	P18572	1 - high confidence	TSDTGEEEAITN[115]	TSDTGEEEAITD	2	634.265
Mouse	P18572	1 - high confidence	YVCN[115]ATNAQGTTR	YVCDATNAQGTTR	2	728.831
Mouse	P18572	1 - high confidence	GTYVCNATN[115]AQGTTR	GTYVCNATDAQGTTR	2	807.865
Mouse	P18572	1 - high confidence	LDVNVDPGTYVCNATN[115]AQGTTR	LDVNVDPGTYVCNATDAQGTTR	2	1184.05
Mouse	P18572	1 - high confidence	NLDVNVDPGTYVCN[115]ATN[115]AQGTTR	NLDVNVDPGTYVCDATDAQGTTR	2	1241.56
Mouse	P18572	1 - high confidence	TSDTGEEEAITNSTEAN[115]GKYVVVSTPEK	TSDTGEEEAITNSTEADGKYVVVSTPEK	2	1479.19
Mouse	P18572	1 - high confidence	DVNVDPGTYVCN[115]ATNAQGTTR	DVNVDPGTYVCDATNAQGTTR	2	1127.51
Mouse	P18572	1 - high confidence	VCN[115]ATN[115]AQGTTR	VCDATDAQGTTR	2	647.791
Mouse	P18572	1 - high confidence	NLDVNVDPGTYVCNATN[115]AQGTTR	NLDVNVDPGTYVCNATDAQGTTR	2	1241.07
Mouse	P18572	1 - high confidence	SQLTISNLDVNVDPGTYVCNATN[115]AQGTTR	SQLTISNLDVNVDPGTYVCNATDAQGTTR	2	1555.74
Mouse	P18572	1 - high confidence	N[115]ATNAQGTTR	DATNAQGTTR	2	517.75
Mouse	P18572	1 - high confidence	TSDTGEEEAITN[115]STE	TSDTGEEEAITDSTE	2	792.826
Mouse	P18572	1 - high confidence	EEEAITN[115]STEANGK	EEEAITDSTEANGK	2	747.337
Mouse	P18572	1 - high confidence	GEEEAITN[115]STEANGK	GEEEAITDSTEANGK	2	775.847
Mouse	P18572	1 - high confidence	EEEAITN[115]STEAN[115]GK	EEEAITDSTEADGK	2	747.829
Mouse	P18572	1 - high confidence	GEEEAITN[115]STEAN[115]GK	GEEEAITDSTEADGK	2	776.339
Mouse	P18572	1 - high confidence	VDPGTYVCN[115]ATN[115]AQGTTR	VDPGTYVCDATDAQGTTR	2	963.932
Mouse	P18572	1 - high confidence	EAITN[115]STEANGK	EAITDSTEANGK	2	618.294
Mouse	P18572	1 - high confidence	EEAITN[115]STEANGK	EEAITDSTEANGK	2	682.815
Mouse	P18572	1 - high confidence	EEAITN[115]STEAN[115]GK	EEAITDSTEADGK	2	683.307
Mouse	P18572	1 - high confidence	LDVNVDPGTYVCN[115]ATNAQGTTR	LDVNVDPGTYVCDATNAQGTTR	2	1184.05
Mouse	P18572	1 - high confidence	GTYVCN[115]ATNAQGTTR	GTYVCDATNAQGTTR	2	807.865
Mouse	P18572	1 - high confidence	TISNLDVNVDPGTYVCN[115]ATNAQGTTR	TISNLDVNVDPGTYVCDATNAQGTTR	2	1391.65
Mouse	P18572	1 - high confidence	TYVCN[115]ATNAQGTTR	TYVCDATNAQGTTR	2	779.355
Mouse	P18572	1 - high confidence	AITN[115]STEANGK	AITDSTEANGK	2	553.773
Mouse	P18572	1 - high confidence	TSDTGEEEAITNSTEAN[115]GK	TSDTGEEEAITNSTEADGK	2	977.925
Mouse	P18572	1 - high confidence	EAITN[115]STEAN[115]GK	EAITDSTEADGK	2	618.786
Mouse	P18572	1 - high confidence	ITN[115]STEANGK	ITDSTEANGK	2	518.254
Mouse	P18572	1 - high confidence	ITN[115]STEAN[115]GK	ITDSTEADGK	2	518.746
Mouse	P18572	1 - high confidence	VCN[115]ATNAQGTTR	VCDATNAQGTTR	2	647.299
Mouse	P18572	1 - high confidence	TSDTGEEEAITN[115]STEAN	TSDTGEEEAITDSTEAN	2	885.366
Mouse	P18572	1 - high confidence	AITN[115]STEAN[115]GK	AITDSTEADGK	2	554.265
Mouse	P18572	1 - high confidence	NLDVNVDPGTYVCN[115]ATNAQGTTR	NLDVNVDPGTYVCDATNAQGTTR	2	1241.07
Mouse	P18572	1 - high confidence	KTSDTGEEEAITN[115]STEANGK	KTSDTGEEEAITDSTEANGK	2	1041.97
Mouse	P18572	1 - high confidence	PGTYVCN[115]ATN[115]AQGTTR	PGTYVCDATDAQGTTR	2	856.884
Mouse	P18572	1 - high confidence	TN[115]STEAN[115]GK	TDSTEADGK	2	462.204
Mouse	P18572	1 - high confidence	CSLN[115]SSGVDIVGHR	CSLDSSGVDIVGHR	2	751.36
Mouse	P18572	1 - high confidence	TQLTCSLN[115]SSGVDIVGH	TQLTCSLDSSGVDIVGH	2	894.928
Mouse	P18572	1 - high confidence	SQLTISNLDVNVDPGTYVCN[115]ATN[115]AQGTTR	SQLTISNLDVNVDPGTYVCDATDAQGTTR	2	1556.23
Mouse	P18572	1 - high confidence	DTGEEEAITN[115]STEAN[115]GK	DTGEEEAITDSTEADGK	2	884.377
Mouse	P18572	1 - high confidence	KTSDTGEEEAITN[115]STEAN[115]GK	KTSDTGEEEAITDSTEADGK	2	1042.46
Mouse	P18572	1 - high confidence	TGEEEAITN[115]STEAN[115]GK	TGEEEAITDSTEADGK	2	826.863
Mouse	P18572	1 - high confidence	TN[115]STEANGK	TDSTEANGK	2	461.712
Mouse	P18572	1 - high confidence	DTGEEEAITN[115]STEANGK	DTGEEEAITDSTEANGK	2	883.885
Mouse	P18572	1 - high confidence	SDTGEEEAITN[115]STEANGK	SDTGEEEAITDSTEANGK	2	927.401
Mouse	P18572	1 - high confidence	SDTGEEEAITN[115]STEAN[115]GK	SDTGEEEAITDSTEADGK	2	927.893
Mouse	P18572	1 - high confidence	TGEEEAITN[115]STEANGK	TGEEEAITDSTEANGK	2	826.371
Mouse	P18572	1 - high confidence	TCSLN[115]SSGVDIVGHR	TCSLDSSGVDIVGHR	2	801.884
Mouse	P18572	1 - high confidence	LTCSLN[115]SSGVDIVGHR	LTCSLDSSGVDIVGHR	2	858.426
Mouse	P18572	1 - high confidence	SQLTISNLDVNVDPGTYVCN[115]ATNAQGTTR	SQLTISNLDVNVDPGTYVCDATNAQGTTR	2	1555.74
Mouse	P18572	1 - high confidence	VDPGTYVCN[115]ATNAQGTTR	VDPGTYVCDATNAQGTTR	2	963.44
Mouse	P18572	1 - high confidence	PGTYVCN[115]ATNAQGTTR	PGTYVCDATNAQGTTR	2	856.392
Mouse	P18572	1 - high confidence	TSDTGEEEAITN[115]STEAN[115]GKYVVVSTPEK	TSDTGEEEAITDSTEADGKYVVVSTPEK	2	1479.69
Mouse	P18572	1 - high confidence	TSDTGEEEAITN[115]STEANGKYVVVSTPEK	TSDTGEEEAITDSTEANGKYVVVSTPEK	2	1479.19
Mouse	P18572	1 - high confidence	LN[115]SSGVDIVGHR	LDSSGVDIVGHR	2	627.828
Mouse	P18572	1 - high confidence	N[115]SSGVDIVGHR	DSSGVDIVGHR	2	571.286
Mouse	P18572	1 - high confidence	SLN[115]SSGVDIVGHR	SLDSSGVDIVGHR	2	671.345
Mouse	P18572	1 - high confidence	TQLTCSLN[115]SSGVDIVGHR	TQLTCSLDSSGVDIVGHR	2	972.979
Mouse	P18572	1 - high confidence	TSDTGEEEAITN[115]STEAN[115]GK	TSDTGEEEAITDSTEADGK	2	978.417
Mouse	P18572	1 - high confidence	TSDTGEEEAITN[115]STEANGK	TSDTGEEEAITDSTEANGK	2	977.925
Mouse	P18581	1 - high confidence	EPPSEN[115]GTSIYGAGGFMPY	EPPSEDGTSIYGAGGFMPY	2	987.928
Mouse	P19070	1 - high confidence	TIPNGN[115]HTGGSIAR	TIPNGDHTGGSIAR	2	698.355
Mouse	P19070	1 - high confidence	TIPN[115]GN[115]HTGGSIAR	TIPDGDHTGGSIAR	2	698.847
Mouse	P19070	1 - high confidence	SLQCVN[115]DSK	SLQCVDDSK	2	526.243
Mouse	P19070	1 - high confidence	PN[115]GN[115]HTGGSIAR	PDGDHTGGSIAR	2	591.782
Mouse	P19070	1 - high confidence	APYFYN[115]DSVMFK	APYFYDDSVMFK	2	741.837
Mouse	P19070	1 - high confidence	PNGN[115]HTGGSIAR	PNGDHTGGSIAR	2	591.29
Mouse	P19070	1 - high confidence	YFYN[115]DSVMFK	YFYDDSVMFK	2	657.792
Mouse	P19137	2 - putative	SLLSN[115]HSEK	SLLSDHSEK	2	508.259
Mouse	P19137	2 - putative	LATNAHISAN[115]ATCGEK	LATNAHISADATCGEK	2	829.897
Mouse	P19137	2 - putative	AHISAN[115]ATCGEK	AHISADATCGEK	2	630.291
Mouse	P19137	2 - putative	ANSLLSN[115]HSEK	ANSLLSDHSEK	2	600.799
Mouse	P19137	2 - putative	GPRPLLAPCVPCNCNN[115]HSDVCDPETGK	GPRPLLAPCVPCNCNDHSDVCDPETGK	2	1533.17
Mouse	P19137	2 - putative	KVATLN[115]QTAR	KVATLDQTAR	2	551.817
Mouse	P19137	2 - putative	PLLAPCVPCNCN[115]N[115]HSDVCDPETGK	PLLAPCVPCNCDDHSDVCDPETGK	2	1378.58
Mouse	P19137	2 - putative	VN[115]ATVQETNDLLHN[115]STMTTL	VDATVQETNDLLHDSTMTTL	2	1102.53
Mouse	P19137	2 - putative	FN[115]TSEDLSR	FDTSEDLSR	2	535.246
Mouse	P19137	2 - putative	EAN[115]SLLSN[115]HSEK	EADSLLSDHSEK	2	665.813
Mouse	P19137	2 - putative	SHLVLPLN[115]QSDVR	SHLVLPLDQSDVR	2	739.905
Mouse	P19137	2 - putative	VN[115]ATVQETN[115]DLLHNSTMTTLLAGR	VDATVQETDDLLHNSTMTTLLAGR	2	1301.15
Mouse	P19137	2 - putative	ATNAHISAN[115]ATCGEK	ATNAHISADATCGEK	2	773.355
Mouse	P19137	2 - putative	PLLAPCVPCNCNN[115]HSDVCDPETGK	PLLAPCVPCNCNDHSDVCDPETGK	2	1378.09
Mouse	P19137	2 - putative	N[115]FTEMQQN[115]ATLELK	DFTEMQQDATLELK	2	834.896
Mouse	P19137	2 - putative	VNATVQETN[115]DLLHN[115]STMTTLLAGR	VNATVQETDDLLHDSTMTTLLAGR	2	1301.15
Mouse	P19137	2 - putative	LVLPLN[115]QSDVR	LVLPLDQSDVR	2	627.859
Mouse	P19137	2 - putative	YNN[115]GTWYK	YNDGTWYK	2	523.736
Mouse	P19137	2 - putative	AFMTVDGQESPSVTVVGN[115]ATTLDVER	AFMTVDGQESPSVTVVGDATTLDVER	2	1362.66
Mouse	P19137	2 - putative	N[115]SSGILLVALGK	DSSGILLVALGK	2	586.851
Mouse	P19137	2 - putative	VQEEQN[115]VTSELIAK	VQEEQDVTSELIAK	2	794.91
Mouse	P19137	2 - putative	QISIN[115]NTAVMQR	QISIDNTAVMQR	2	688.357
Mouse	P19137	2 - putative	VN[115]ATVQETN[115]DLLHN[115]STMTTLLAGR	VDATVQETDDLLHDSTMTTLLAGR	2	1301.64
Mouse	P19137	2 - putative	VN[115]ATVQETNDLLHN[115]STMTTLLAGR	VDATVQETNDLLHDSTMTTLLAGR	2	1301.15
Mouse	P19137	2 - putative	GILENLEN[115]TTK	GILENLEDTTK	2	616.825
Mouse	P19137	2 - putative	VATLN[115]QTAR	VATLDQTAR	2	487.77
Mouse	P19137	2 - putative	QAN[115]DSLAMLR	QADDSLAMLR	2	560.28
Mouse	P19137	2 - putative	EANSLLSN[115]HSEK	EANSLLSDHSEK	2	665.321
Mouse	P19137	2 - putative	TAN[115]KTDLISESLASR	TADKTDLISESLASR	2	803.921
Mouse	P19137	2 - putative	ELAAAAN[115]ESAVK	ELAAAADESAVK	2	587.804
Mouse	P19137	2 - putative	ERN[115]FTEMQQN[115]ATLELK	ERDFTEMQQDATLELK	2	977.468
Mouse	P19137	2 - putative	IAN[115]ISMEVGR	IADISMEVGR	2	545.785
Mouse	P19137	2 - putative	VFN[115]TSEDLSR	VFDTSEDLSR	2	584.781
Mouse	P19324	3 - unspecific	DN[115]QSGSLLFIGR	DDQSGSLLFIGR	2	654.336
Mouse	P19324	3 - unspecific	SLSN[115]STAR	SLSDSTAR	2	418.712
Mouse	P19437	1 - high confidence	PYVDIYDCEPSN[115]SSEK	PYVDIYDCEPSDSSEK	2	952.402
Mouse	P19437	1 - high confidence	VDIYDCEPSN[115]SSEK	VDIYDCEPSDSSEK	2	822.344
Mouse	P20060	3 - unspecific	TIN[115]ESSIADSPR	TIDESSIADSPR	2	645.815
Mouse	P20334	1 - high confidence	TCSLGTFNDQN[115]GTGVCR	TCSLGTFNDQDGTGVCR	2	944.405
Mouse	P20352	1 - high confidence	KTN[115]ITNTNEF	KTDITNTNEF	2	591.789
Mouse	P20352	1 - high confidence	N[115]GTFLTLR	DGTFLTLR	2	461.756
Mouse	P20352	1 - high confidence	AFN[115]LTWISTDFK	AFDLTWISTDFK	2	722.364
Mouse	P20352	1 - high confidence	KN[115]GTFLTLR	KDGTFLTLR	2	525.804
Mouse	P20352	1 - high confidence	PTN[115]YTYTVQISDR	PTDYTYTVQISDR	2	779.876
Mouse	P20489	1 - high confidence	NN[115]HLQMNSTTK	NDHLQMNSTTK	2	644.804
Mouse	P20693	1 - high confidence	QLGDTAIQN[115]VSHVT	QLGDTAIQDVSHVT	2	742.376
Mouse	P20693	1 - high confidence	SQN[115]LTGLQEDLR	SQDLTGLQEDLR	2	687.85
Mouse	P20693	1 - high confidence	QLGDTAIQN[115]VSHVTK	QLGDTAIQDVSHVTK	2	806.423
Mouse	P20693	1 - high confidence	LSQN[115]LTGLQEDLR	LSQDLTGLQEDLR	2	744.392
Mouse	P20826	1 - high confidence	FSN[115]ISEGLSN[115]YSIIDK	FSDISEGLSDYSIIDK	2	894.934
Mouse	P20826	1 - high confidence	FSN[115]ISEGLSNYSIIDK	FSDISEGLSNYSIIDK	2	894.442
Mouse	P21447	1 - high confidence	N[115]STN[115]MSEADKR	DSTDMSEADKR	2	627.77
Mouse	P21661	3 - unspecific	AGVATTDLYGN[115]CTLR	AGVATTDLYGDCTLR	2	806.888
Mouse	P21661	3 - unspecific	HVQAVITVN[115]ATR	HVQAVITVDATR	2	655.368
Mouse	P21661	3 - unspecific	RGDLNIN[115]MTSPMGT	RGDLNIDMTSPMGT	2	754.351
Mouse	P21661	3 - unspecific	RGDLNIN[115]MTSPMGTK	RGDLNIDMTSPMGTK	2	818.398
Mouse	P21661	3 - unspecific	RNPEAGVATTDLYGN[115]CTLR	RNPEAGVATTDLYGDCTLR	2	1055.01
Mouse	P21661	3 - unspecific	NPEAGVATTDLYGN[115]CTLR	NPEAGVATTDLYGDCTLR	2	976.958
Mouse	P21803	1 - high confidence	GVN[115]TTDKEIEVLYIR	GVDTTDKEIEVLYIR	2	875.968
Mouse	P21803	1 - high confidence	DGVHLGPNN[115]R	DGVHLGPNDR	2	540.268
Mouse	P21803	1 - high confidence	AAGVN[115]TTDKEIEVLYIR	AAGVDTTDKEIEVLYIR	2	947.005
Mouse	P21844	2 - putative	SITVLLGAHN[115]K	SITVLLGAHDK	2	577.335
Mouse	P21855	1 - high confidence	IWEATN[115]SSLQQQL	IWEATDSSLQQQL	2	759.878
Mouse	P21855	1 - high confidence	WEATN[115]SSLQQQLR	WEATDSSLQQQLR	2	781.387
Mouse	P21855	1 - high confidence	IWEATN[115]SSLQQQLR	IWEATDSSLQQQLR	2	837.929
Mouse	P21956	2 - putative	EFLGNLDN[115]NSLK	EFLGNLDDNSLK	2	682.841
Mouse	P21956	2 - putative	GFTGLVCN[115]ETER	GFTGLVCDETER	2	692.317
Mouse	P21956	2 - putative	CPEGFTGLVCN[115]ETER	CPEGFTGLVCDETER	2	885.38
Mouse	P21956	2 - putative	NN[115]TIPDSQMSASSSYK	NDTIPDSQMSASSSYK	2	865.884
Mouse	P21956	2 - putative	TGLVCN[115]ETER	TGLVCDETER	2	590.272
Mouse	P21956	2 - putative	N[115]NTIPDSQMSASSSYK	DNTIPDSQMSASSSYK	2	865.884
Mouse	P21995	1 - high confidence	GNETAQVPIDAHSN[115]EK	GNETAQVPIDAHSDEK	2	855.903
Mouse	P21995	1 - high confidence	N[115]GSHANETR	DGSHANETR	2	493.721
Mouse	P21995	1 - high confidence	KYSN[115]LSLK	KYSDLSLK	2	477.272
Mouse	P21995	1 - high confidence	PIDAHSN[115]EK	PIDAHSDEK	2	506.244
Mouse	P21995	1 - high confidence	N[115]ETAQVPIDAHSN[115]EK	DETAQVPIDAHSDEK	2	827.884
Mouse	P21995	1 - high confidence	KDDEPLETTGDFN[115]TT	KDDEPLETTGDFDTT	2	842.368
Mouse	P21995	1 - high confidence	SNVSVEEN[115]VILEK	SNVSVEEDVILEK	2	730.881
Mouse	P21995	1 - high confidence	YIIN[115]GSHAN[115]E	YIIDGSHADE	2	560.254
Mouse	P21995	1 - high confidence	ETTGDFN[115]TTK	ETTGDFDTTK	2	557.752
Mouse	P21995	1 - high confidence	YSN[115]LSLKSCN[115]ISVTEK	YSDLSLKSCDISVTEK	2	922.954
Mouse	P21995	1 - high confidence	CVCQDCLPLN[115]WTWYMGN[115]ETAQVPIDAHSN[115]EK	CVCQDCLPLDWTWYMGDETAQVPIDAHSDEK	2	1870.3
Mouse	P21995	1 - high confidence	CVCQDCLPLNWTWYMGNETAQVPIDAHSN[115]EK	CVCQDCLPLNWTWYMGNETAQVPIDAHSDEK	2	1869.31
Mouse	P21995	1 - high confidence	SN[115]VSVEEN[115]VILEKPSHVELK	SDVSVEEDVILEKPSHVELK	2	1126.59
Mouse	P21995	1 - high confidence	DDEPLETTGDFN[115]TTKMGNTLTSQYR	DDEPLETTGDFDTTKMGNTLTSQYR	2	1418.14
Mouse	P21995	1 - high confidence	KDDEPLETTGDFN[115]	KDDEPLETTGDFD	2	741.321
Mouse	P21995	1 - high confidence	VPIDAHSN[115]EK	VPIDAHSDEK	2	555.778
Mouse	P21995	1 - high confidence	IIN[115]GSHANETR	IIDGSHANETR	2	606.805
Mouse	P21995	1 - high confidence	MGNETAQVPIDAHSN[115]EK	MGNETAQVPIDAHSDEK	2	921.423
Mouse	P21995	1 - high confidence	KYIIN[115]GSHAN[115]ETR	KYIIDGSHADETR	2	752.876
Mouse	P21995	1 - high confidence	CVCQDCLPLN[115]WTWYMGNETAQVPIDAHSN[115]EK	CVCQDCLPLDWTWYMGNETAQVPIDAHSDEK	2	1869.81
Mouse	P21995	1 - high confidence	GN[115]ETAQVPIDAHSN[115]EK	GDETAQVPIDAHSDEK	2	856.395
Mouse	P21995	1 - high confidence	IN[115]GSHANETR	IDGSHANETR	2	550.263
Mouse	P21995	1 - high confidence	WYMGN[115]ETAQVPIDAHSNEK	WYMGDETAQVPIDAHSNEK	2	1095.99
Mouse	P21995	1 - high confidence	YMGN[115]ETAQVPIDAHSNEK	YMGDETAQVPIDAHSNEK	2	1002.96
Mouse	P21995	1 - high confidence	YIIN[115]GSHAN[115]ET	YIIDGSHADET	2	610.778
Mouse	P21995	1 - high confidence	KDDEPLETTGDFN[115]TTKMGNTLTSQYR	KDDEPLETTGDFDTTKMGNTLTSQYR	2	1482.19
Mouse	P21995	1 - high confidence	CVCQDCLPLN[115]WTWYMGN[115]ETAQVPIDAHSNEK	CVCQDCLPLDWTWYMGDETAQVPIDAHSNEK	2	1869.81
Mouse	P21995	1 - high confidence	DLNLMN[115]VTWKKDDEPLETTGDFN[115]TTK	DLNLMDVTWKKDDEPLETTGDFDTTK	2	1514.21
Mouse	P21995	1 - high confidence	N[115]ETAQVPIDAHSNEK	DETAQVPIDAHSNEK	2	827.392
Mouse	P21995	1 - high confidence	YIIN[115]GSHANETR	YIIDGSHANETR	2	688.337
Mouse	P21995	1 - high confidence	EPLETTGDFN[115]TTK	EPLETTGDFDTTK	2	727.341
Mouse	P21995	1 - high confidence	LNLMN[115]VTWK	LNLMDVTWK	2	560.3
Mouse	P21995	1 - high confidence	NLMN[115]VTWK	NLMDVTWK	2	503.758
Mouse	P21995	1 - high confidence	TTGDFN[115]TTK	TTGDFDTTK	2	493.23
Mouse	P21995	1 - high confidence	DEPLETTGDFN[115]TTK	DEPLETTGDFDTTK	2	784.855
Mouse	P21995	1 - high confidence	PLETTGDFN[115]TTK	PLETTGDFDTTK	2	662.82
Mouse	P21995	1 - high confidence	GSHAN[115]ETR	GSHADETR	2	436.699
Mouse	P21995	1 - high confidence	TGDFN[115]TTK	TGDFDTTK	2	442.706
Mouse	P21995	1 - high confidence	LMN[115]VTWK	LMDVTWK	2	446.737
Mouse	P21995	1 - high confidence	MGN[115]ETAQVPIDAHSN[115]EK	MGDETAQVPIDAHSDEK	2	921.915
Mouse	P21995	1 - high confidence	SN[115]VSVEENVILEKPSHVELK	SDVSVEENVILEKPSHVELK	2	1126.1
Mouse	P21995	1 - high confidence	GN[115]ETAQVPIDAHSNEK	GDETAQVPIDAHSNEK	2	855.903
Mouse	P21995	1 - high confidence	SNVSVEEN[115]VILEKPSHVELK	SNVSVEEDVILEKPSHVELK	2	1126.1
Mouse	P21995	1 - high confidence	SCN[115]ISVTEK	SCDISVTEK	2	519.745
Mouse	P21995	1 - high confidence	DLN[115]LMN[115]VTWK	DLDLMDVTWK	2	618.305
Mouse	P21995	1 - high confidence	SN[115]VSVEENVILEK	SDVSVEENVILEK	2	730.881
Mouse	P21995	1 - high confidence	N[115]GSHAN[115]ETR	DGSHADETR	2	494.213
Mouse	P21995	1 - high confidence	IIN[115]GSHAN[115]ETR	IIDGSHADETR	2	607.297
Mouse	P21995	1 - high confidence	DDEPLETTGDFN[115]TTK	DDEPLETTGDFDTTK	2	842.368
Mouse	P21995	1 - high confidence	IN[115]GSHAN[115]ETR	IDGSHADETR	2	550.755
Mouse	P21995	1 - high confidence	YSN[115]LSLK	YSDLSLK	2	413.224
Mouse	P21995	1 - high confidence	MGN[115]ETAQVPIDAHSNEK	MGDETAQVPIDAHSNEK	2	921.423
Mouse	P21995	1 - high confidence	YIIN[115]GSHAN[115]ETR	YIIDGSHADETR	2	688.829
Mouse	P21995	1 - high confidence	KDDEPLETTGDFN[115]TTK	KDDEPLETTGDFDTTK	2	906.416
Mouse	P21995	1 - high confidence	DLNLMN[115]VTWK	DLNLMDVTWK	2	617.813
Mouse	P22272	1 - high confidence	EAAGN[115]VTIH	EAAGDVTIH	2	456.728
Mouse	P22723	1 - high confidence	KSDDDYEDYASN[115]K	KSDDDYEDYASDK	2	775.813
Mouse	P22725	2 - putative	WN[115]CSTVDN[115]TSVFGR	WDCSTVDDTSVFGR	2	822.855
Mouse	P22725	2 - putative	WN[115]CSTVDNTSVFGR	WDCSTVDNTSVFGR	2	822.363
Mouse	P23818	1 - high confidence	ESGAN[115]VTGFQLVN[115]YTDTIPAR	ESGADVTGFQLVDYTDTIPAR	2	1128.05
Mouse	P23818	1 - high confidence	FVPAATDAQAGGDN[115]SSVQN[115]R	FVPAATDAQAGGDDSSVQDR	2	1003.96
Mouse	P23819	1 - high confidence	VVTLTELPSGN[115]DTSGLEN[115]K	VVTLTELPSGDDTSGLEDK	2	988.492
Mouse	P23819	1 - high confidence	IN[115]YTINIMELK	IDYTINIMELK	2	676.863
Mouse	P23819	1 - high confidence	MVVTLTELPSGN[115]DTSGLEN[115]K	MVVTLTELPSGDDTSGLEDK	2	1054.01
Mouse	P24063	1 - high confidence	LSN[115]TSYQFAAVQF	LSDTSYQFAAVQF	2	738.857
Mouse	P24063	1 - high confidence	KLSN[115]TSYQ	KLSDTSYQ	2	471.235
Mouse	P24063	1 - high confidence	KLSN[115]TSYQF	KLSDTSYQF	2	544.77
Mouse	P24063	1 - high confidence	KGN[115]ISAAHDITR	KGDISAAHDITR	2	642.342
Mouse	P24063	1 - high confidence	AN[115]LSYTLQLDGHR	ADLSYTLQLDGHR	2	744.879
Mouse	P24063	1 - high confidence	ITDGEASDKGN[115]ISAAHDITR	ITDGEASDKGDISAAHDITR	2	1036.5
Mouse	P24063	1 - high confidence	LAN[115]LSYTLQLDGHR	LADLSYTLQLDGHR	2	801.421
Mouse	P24063	1 - high confidence	VIITDGEASDKGN[115]ISAAHDITR	VIITDGEASDKGDISAAHDITR	2	1142.58
Mouse	P24063	1 - high confidence	KLSN[115]TSYQFAAVQ	KLSDTSYQFAAVQ	2	729.37
Mouse	P24063	1 - high confidence	GLFPDGSHELSGN[115]TSITPD	GLFPDGSHELSGDTSITPD	2	972.948
Mouse	P24063	1 - high confidence	SSLSVSFN[115]SSK	SSLSVSFDSSK	2	572.283
Mouse	P24063	1 - high confidence	NCGEDKKCEAN[115]LTLSSPA	NCGEDKKCEADLTLSSPA	2	997.946
Mouse	P24063	1 - high confidence	SLN[115]FSLLEEEGTPR	SLDFSLLEEEGTPR	2	796.897
Mouse	P24063	1 - high confidence	FPDGSHELSGN[115]TSITPDK	FPDGSHELSGDTSITPDK	2	951.942
Mouse	P24063	1 - high confidence	LLAN[115]LSYTLQLDGHR	LLADLSYTLQLDGHR	2	857.963
Mouse	P24063	1 - high confidence	CN[115]VSSPIFK	CDVSSPIFK	2	526.761
Mouse	P24063	1 - high confidence	KLSN[115]TSYQFAAVQF	KLSDTSYQFAAVQF	2	802.904
Mouse	P24063	1 - high confidence	SGN[115]TSITPDK	SGDTSITPDK	2	510.749
Mouse	P24063	1 - high confidence	TDGEASDKGN[115]ISAAHDITR	TDGEASDKGDISAAHDITR	2	979.959
Mouse	P24063	1 - high confidence	N[115]CGEDKKCEAN[115]LTLSSPAR	DCGEDKKCEADLTLSSPAR	2	1076.49
Mouse	P24063	1 - high confidence	GEASDKGN[115]ISAAHDITR	GEASDKGDISAAHDITR	2	871.922
Mouse	P24063	1 - high confidence	PVSLHGSN[115]HTSK	PVSLHGSDHTSK	2	632.821
Mouse	P24063	1 - high confidence	CEAN[115]LTLSSPAR	CEADLTLSSPAR	2	660.32
Mouse	P24063	1 - high confidence	KCEAN[115]LTLSSPAR	KCEADLTLSSPAR	2	724.367
Mouse	P24063	1 - high confidence	PDGSHELSGN[115]TSITPDK	PDGSHELSGDTSITPDK	2	878.408
Mouse	P24063	1 - high confidence	EQEN[115]STLYISFTPK	EQEDSTLYISFTPK	2	829.404
Mouse	P24063	1 - high confidence	GSHELSGN[115]TSITPDK	GSHELSGDTSITPDK	2	772.368
Mouse	P24063	1 - high confidence	NCGEDKKCEAN[115]LTLSSPAR	NCGEDKKCEADLTLSSPAR	2	1076
Mouse	P24063	1 - high confidence	GN[115]ISAAHDITR	GDISAAHDITR	2	578.294
Mouse	P24063	1 - high confidence	VLVIITDGEASDKGN[115]ISAAHDITR	VLVIITDGEASDKGDISAAHDITR	2	1248.65
Mouse	P24063	1 - high confidence	TSSEFCQPVSLHGSN[115]HTSK	TSSEFCQPVSLHGSDHTSK	2	1052.48
Mouse	P24063	1 - high confidence	GLFPDGSHELSGN[115]TSITPDK	GLFPDGSHELSGDTSITPDK	2	1037
Mouse	P24369	3 - unspecific	DTN[115]GSQFFITTVK	DTDGSQFFITTVK	2	729.862
Mouse	P24383	2 - putative	WN[115]CSALGER	WDCSALGER	2	547.243
Mouse	P24383	2 - putative	AITAACTQGN[115]LSDCGCDK	AITAACTQGDLSDCGCDK	2	971.904
Mouse	P24638	2 - putative	YHGFLN[115]TSYHR	YHGFLDTSYHR	2	698.329
Mouse	P24638	2 - putative	YEQLQN[115]ETR	YEQLQDETR	2	591.278
Mouse	P24668	2 - putative	IN[115]ETHIFN[115]GSNW	IDETHIFDGSNW	2	717.323
Mouse	P24668	2 - putative	EASN[115]HSSGAGLVQIN	EASDHSSGAGLVQIN	2	742.855
Mouse	P24668	2 - putative	IN[115]ETHIFN[115]GSNWIML	IDETHIFDGSNWIML	2	895.928
Mouse	P24668	2 - putative	SN[115]HSSGAGLVQINK	SDHSSGAGLVQINK	2	706.863
Mouse	P24668	2 - putative	IN[115]ETHIFN[115]GSNWIMLIYK	IDETHIFDGSNWIMLIYK	2	1098.05
Mouse	P24668	2 - putative	ASN[115]HSSGAGLVQINK	ASDHSSGAGLVQINK	2	742.382
Mouse	P24668	2 - putative	SN[115]HSSGAGLVQIN[115]K	SDHSSGAGLVQIDK	2	707.355
Mouse	P24668	2 - putative	ASN[115]HSSGAGLVQIN[115]K	ASDHSSGAGLVQIDK	2	742.874
Mouse	P24668	2 - putative	IN[115]ETHIFN[115]GSN	IDETHIFDGSN	2	624.284
Mouse	P24668	2 - putative	IN[115]ETHIFN[115]GSNWIM	IDETHIFDGSNWIM	2	839.386
Mouse	P24668	2 - putative	EASN[115]HSSGAGLVQINK	EASDHSSGAGLVQINK	2	806.903
Mouse	P24668	2 - putative	EASN[115]HSSGAGLVQIN[115]K	EASDHSSGAGLVQIDK	2	807.395
Mouse	P24807	1 - high confidence	NQTSVAPFPGN[115]QNISASPN[115]PSNATTR	NQTSVAPFPGDQNISASPDPSNATTR	2	1336.63
Mouse	P24807	1 - high confidence	NQTSVAPFPGN[115]QNISASPNPSN[115]ATTR	NQTSVAPFPGDQNISASPNPSDATTR	2	1336.63
Mouse	P24807	1 - high confidence	ISASPN[115]PSNATTR	ISASPDPSNATTR	2	658.829
Mouse	P24807	1 - high confidence	NQTSVAPFPGN[115]QN[115]ISASPN[115]PSNATTR	NQTSVAPFPGDQDISASPDPSNATTR	2	1337.13
Mouse	P24807	1 - high confidence	VAPFPGNQN[115]ISASPNPSN[115]ATTR	VAPFPGNQDISASPNPSDATTR	2	1121.54
Mouse	P24807	1 - high confidence	QTSVAPFPGNQN[115]ISASPN[115]PSN[115]ATTR	QTSVAPFPGNQDISASPDPSDATTR	2	1280.1
Mouse	P24807	1 - high confidence	VAPFPGNQN[115]ISASPN[115]PSN[115]ATTR	VAPFPGNQDISASPDPSDATTR	2	1122.04
Mouse	P24807	1 - high confidence	APFPGNQN[115]ISASPNPSN[115]ATTR	APFPGNQDISASPNPSDATTR	2	1072.01
Mouse	P24807	1 - high confidence	N[115]QTSVAPFPGNQN[115]ISASPN[115]PSNATTR	DQTSVAPFPGNQDISASPDPSNATTR	2	1337.13
Mouse	P24807	1 - high confidence	N[115]QTSVAPFPGNQNISASPNPSN[115]ATTR	DQTSVAPFPGNQNISASPNPSDATTR	2	1336.63
Mouse	P24807	1 - high confidence	PFPGNQN[115]ISASPNPSN[115]ATTR	PFPGNQDISASPNPSDATTR	2	1036.49
Mouse	P24807	1 - high confidence	PFPGNQN[115]ISASPN[115]PSN[115]ATTR	PFPGNQDISASPDPSDATTR	2	1036.98
Mouse	P24807	1 - high confidence	NQN[115]ISASPNPSN[115]ATTR	NQDISASPNPSDATTR	2	837.393
Mouse	P24807	1 - high confidence	GNQN[115]ISASPNPSN[115]ATTR	GNQDISASPNPSDATTR	2	865.904
Mouse	P24807	1 - high confidence	APFPGNQN[115]ISASPN[115]PSN[115]ATTR	APFPGNQDISASPDPSDATTR	2	1072.5
Mouse	P24807	1 - high confidence	GNQN[115]ISASPN[115]PSN[115]ATTR	GNQDISASPDPSDATTR	2	866.396
Mouse	P24807	1 - high confidence	PGNQN[115]ISASPNPSN[115]ATTR	PGNQDISASPNPSDATTR	2	914.43
Mouse	P24807	1 - high confidence	TSVAPFPGNQN[115]ISASPNPSN[115]ATTR	TSVAPFPGNQDISASPNPSDATTR	2	1215.58
Mouse	P24807	1 - high confidence	NQN[115]ISASPN[115]PSN[115]ATTR	NQDISASPDPSDATTR	2	837.885
Mouse	P24807	1 - high confidence	TSVAPFPGNQN[115]ISASPN[115]PSN[115]ATTR	TSVAPFPGNQDISASPDPSDATTR	2	1216.08
Mouse	P24807	1 - high confidence	SPNPSN[115]ATTR	SPNPSDATTR	2	523.252
Mouse	P24807	1 - high confidence	SPN[115]PSN[115]ATTR	SPDPSDATTR	2	523.744
Mouse	P24807	1 - high confidence	PGNQN[115]ISASPN[115]PSN[115]ATTR	PGNQDISASPDPSDATTR	2	914.922
Mouse	P24807	1 - high confidence	NQTSVAPFPGNQN[115]ISASPNPSN[115]ATTR	NQTSVAPFPGNQDISASPNPSDATTR	2	1336.63
Mouse	P24807	1 - high confidence	PNPSN[115]ATTR	PNPSDATTR	2	479.736
Mouse	P24807	1 - high confidence	ASPNPSN[115]ATTR	ASPNPSDATTR	2	558.771
Mouse	P24807	1 - high confidence	N[115]QTSVAPFPGN[115]QNISASPNPSN[115]ATTR	DQTSVAPFPGDQNISASPNPSDATTR	2	1337.13
Mouse	P24807	1 - high confidence	ASPN[115]PSN[115]ATTR	ASPDPSDATTR	2	559.263
Mouse	P24807	1 - high confidence	ISASPN[115]PSN[115]ATTR	ISASPDPSDATTR	2	659.321
Mouse	P24807	1 - high confidence	ISASPNPSN[115]ATTR	ISASPNPSDATTR	2	658.829
Mouse	P24807	1 - high confidence	NQTSVAPFPGN[115]QN[115]ISASPNPSN[115]ATTR	NQTSVAPFPGDQDISASPNPSDATTR	2	1337.13
Mouse	P24807	1 - high confidence	QN[115]ISASPNPSN[115]ATTR	QDISASPNPSDATTR	2	780.371
Mouse	P24807	1 - high confidence	QN[115]ISASPN[115]PSN[115]ATTR	QDISASPDPSDATTR	2	780.863
Mouse	P24807	1 - high confidence	N[115]QTSVAPFPGNQN[115]ISASPN[115]PSN[115]ATTR	DQTSVAPFPGNQDISASPDPSDATTR	2	1337.62
Mouse	P24807	1 - high confidence	N[115]QTSVAPFPGNQN[115]ISASPNPSN[115]ATTR	DQTSVAPFPGNQDISASPNPSDATTR	2	1337.13
Mouse	P25446	1 - high confidence	VHETDKN[115]CSEGLYQGGPFCCQPCQPGK	VHETDKDCSEGLYQGGPFCCQPCQPGK	2	1577.66
Mouse	P25446	1 - high confidence	VHETDKN[115]CSEGLYQGGPF	VHETDKDCSEGLYQGGPF	2	1019.95
Mouse	P25446	1 - high confidence	CTLCDEEHGLEVETN[115]CTLTQNTK	CTLCDEEHGLEVETDCTLTQNTK	2	1377.09
Mouse	P25446	1 - high confidence	ETDKN[115]CSEGLYQGGPFCCQPCQPGK	ETDKDCSEGLYQGGPFCCQPCQPGK	2	1459.6
Mouse	P25918	1 - high confidence	RWN[115]ASDVR	RWDASDVR	2	502.752
Mouse	P25918	1 - high confidence	RGN[115]LTIER	RGDLTIER	2	480.27
Mouse	P25918	1 - high confidence	GSSLN[115]QSLINQDLTVAPGSTLWL	GSSLDQSLINQDLTVAPGSTLWL	2	1208.13
Mouse	P25918	1 - high confidence	GN[115]LTIER	GDLTIER	2	402.22
Mouse	P25918	1 - high confidence	WN[115]ASDVR	WDASDVR	2	424.702
Mouse	P26011	1 - high confidence	QLN[115]FTASGEAEAR	QLDFTASGEAEAR	2	697.834
Mouse	P26011	1 - high confidence	APN[115]GTGPLCSGK	APDGTGPLCSGK	2	580.277
Mouse	P26049	1 - high confidence	HAPDIPDDSTDN[115]ITIF	HAPDIPDDSTDDITIF	2	886.408
Mouse	P26049	1 - high confidence	HAPDIPDDSTDN[115]ITIFTR	HAPDIPDDSTDDITIFTR	2	1014.98
Mouse	P26049	1 - high confidence	LVDN[115]GTLLYTMR	LVDDGTLLYTMR	2	698.864
Mouse	P26151	1 - high confidence	TN[115]LSHSGIY	TDLSHSGIY	2	496.741
Mouse	P26151	1 - high confidence	ILEYRN[115]TSSEYHIAR	ILEYRDTSSEYHIAR	2	926.966
Mouse	P26151	1 - high confidence	N[115]LSHSGIYHCSGTGR	DLSHSGIYHCSGTGR	2	823.874
Mouse	P26151	1 - high confidence	TN[115]LSHSGIYHC	TDLSHSGIYHC	2	645.286
Mouse	P26151	1 - high confidence	N[115]TSSEYHIAR	DTSSEYHIAR	2	589.778
Mouse	P26151	1 - high confidence	TN[115]LSHSGIYH	TDLSHSGIYH	2	565.27
Mouse	P26151	1 - high confidence	TN[115]LSHSGIYHCSGTGR	TDLSHSGIYHCSGTGR	2	874.397
Mouse	P26618	1 - high confidence	DN[115]LTLIEN[115]LTEITTDVQK	DDLTLIEDLTEITTDVQK	2	1031.53
Mouse	P26952	1 - high confidence	SEPQEYN[115]VSIPHFWVPN	SEPQEYDVSIPHFWVPN	2	1022.48
Mouse	P26952	1 - high confidence	FHHGLLGYTLQVN[115]QSSR	FHHGLLGYTLQVDQSSR	2	979.501
Mouse	P26952	1 - high confidence	AEVLAPPTLTVECN[115]GSEAHAR	AEVLAPPTLTVECDGSEAHAR	2	1112.04
Mouse	P26952	1 - high confidence	PPTLTVECN[115]GSEAHAR	PPTLTVECDGSEAHAR	2	870.408
Mouse	P26952	1 - high confidence	SEPQEYN[115]VSIPH	SEPQEYDVSIPH	2	700.823
Mouse	P26952	1 - high confidence	TLQVN[115]QSSR	TLQVDQSSR	2	517.27
Mouse	P27038	1 - high confidence	TN[115]QTGVEPCYGDKDK	TDQTGVEPCYGDKDK	2	856.878
Mouse	P27038	1 - high confidence	TN[115]QTGVEPCYGDK	TDQTGVEPCYGDK	2	735.317
Mouse	P27038	1 - high confidence	DRTN[115]QTGVEPCYGDKDK	DRTDQTGVEPCYGDKDK	2	992.442
Mouse	P27038	1 - high confidence	DRTN[115]QTGVEPCYGDK	DRTDQTGVEPCYGDK	2	870.881
Mouse	P27040	1 - high confidence	N[115]SSGTIELVK	DSSGTIELVK	2	524.783
Mouse	P27046	2 - putative	GSPGN[115]ASQGSIHLHSPQLALQADPR	GSPGDASQGSIHLHSPQLALQADPR	2	1270.14
Mouse	P27046	2 - putative	DSVIN[115]LSESVEDGPR	DSVIDLSESVEDGPR	2	809.387
Mouse	P27512	1 - high confidence	SN[115]QSSLFEK	SDQSSLFEK	2	520.751
Mouse	P27512	1 - high confidence	GFFSN[115]QSSLFEK	GFFSDQSSLFEK	2	696.331
Mouse	P27512	1 - high confidence	FSN[115]QSSLFEK	FSDQSSLFEK	2	594.286
Mouse	P27573	1 - high confidence	DGSIVIHNLDYSDN[115]GTFTCDVK	DGSIVIHNLDYSDDGTFTCDVK	2	1236.06
Mouse	P27573	1 - high confidence	SDN[115]GTFTCDVK	SDDGTFTCDVK	2	622.762
Mouse	P27659	3 - unspecific	NN[115]ASTDYDLSDK	NDASTDYDLSDK	2	672.287
Mouse	P27931	1 - high confidence	TYN[115]GQEYN[115]ITR	TYDGQEYDITR	2	680.807
Mouse	P27931	1 - high confidence	TYNGQEYN[115]ITR	TYNGQEYDITR	2	680.315
Mouse	P27931	1 - high confidence	LLISN[115]TSMDDAGYYR	LLISDTSMDDAGYYR	2	860.401
Mouse	P28047	2 - putative	AVTAACSQGN[115]LSNCGCDR	AVTAACSQGDLSNCGCDR	2	971.399
Mouse	P28047	2 - putative	WN[115]CSALGEK	WDCSALGEK	2	533.24
Mouse	P28078	2 - putative	PQN[115]HTFR	PQDHTFR	2	450.723
Mouse	P28078	2 - putative	DDPQN[115]HTFR	DDPQDHTFR	2	565.75
Mouse	P28481	2 - putative	LLSTEGSQN[115]ITYHCK	LLSTEGSQDITYHCK	2	876.42
Mouse	P28481	2 - putative	LLSTEGSQN[115]ITYH	LLSTEGSQDITYH	2	732.357
Mouse	P28571	1 - high confidence	SGN[115]LSHLFN[115]YTLQR	SGDLSHLFDYTLQR	2	826.41
Mouse	P28571	1 - high confidence	LFN[115]YTLQR	LFDYTLQR	2	528.283
Mouse	P28571	1 - high confidence	LSGN[115]LSHLFN[115]YTLQR	LSGDLSHLFDYTLQR	2	882.952
Mouse	P28571	1 - high confidence	PAALSGN[115]LSHLFN[115]YTLQR	PAALSGDLSHLFDYTLQR	2	1002.52
Mouse	P28653	2 - putative	MIEN[115]GSLSFLPTLR	MIEDGSLSFLPTLR	2	789.916
Mouse	P28654	2 - putative	ISDTN[115]ITAIPQGLPTSLTEVHLDGNK	ISDTDITAIPQGLPTSLTEVHLDGNK	2	1368.21
Mouse	P28665	2 - putative	YLN[115]ETQQLTQK	YLDETQQLTQK	2	683.849
Mouse	P28798	2 - putative	NVECGEGHFCHDN[115]QTCCK	NVECGEGHFCHDDQTCCK	2	1126.92
Mouse	P28828	1 - high confidence	WEPFGYN[115]VTR	WEPFGYDVTR	2	635.302
Mouse	P28828	1 - high confidence	PFGYN[115]VTR	PFGYDVTR	2	477.741
Mouse	P28828	1 - high confidence	VNN[115]GPLGNPIWN[115]ISGDPTR	VNDGPLGNPIWDISGDPTR	2	1012
Mouse	P28828	1 - high confidence	VNNGPLGNPIWN[115]ISGDPTR	VNNGPLGNPIWDISGDPTR	2	1011.51
Mouse	P28828	1 - high confidence	FIASFNVVN[115]TTK	FIASFNVVDTTK	2	671.359
Mouse	P28828	1 - high confidence	AVSSFDPEIDLSN[115]QSGR	AVSSFDPEIDLSDQSGR	2	911.929
Mouse	P28843	1 - high confidence	YMGLPIPEDNLDHYRN[115]STVMSR	YMGLPIPEDNLDHYRDSTVMSR	2	1305.11
Mouse	P28843	1 - high confidence	INLTWN[115]CPSEQQHVEMSTTGWVGR	INLTWDCPSEQQHVEMSTTGWVGR	2	1416.15
Mouse	P28843	1 - high confidence	IN[115]LTWNCPSEQQHVE	IDLTWNCPSEQQHVE	2	928.421
Mouse	P28843	1 - high confidence	IPN[115]NTQWITWSPE	IPDNTQWITWSPE	2	793.881
Mouse	P28843	1 - high confidence	IPNN[115]TQWITWSPE	IPNDTQWITWSPE	2	793.881
Mouse	P28843	1 - high confidence	IN[115]LTWNCPSEQQHVEMSTTGWVGR	IDLTWNCPSEQQHVEMSTTGWVGR	2	1416.15
Mouse	P28843	1 - high confidence	N[115]STVMSR	DSTVMSR	2	398.19
Mouse	P28843	1 - high confidence	IQN[115]YSVMAICDYDK	IQDYSVMAICDYDK	2	860.884
Mouse	P28843	1 - high confidence	LDFIVLN[115]ETR	LDFIVLDETR	2	610.833
Mouse	P28843	1 - high confidence	IPNN[115]TQWITWSPEGHK	IPNDTQWITWSPEGHK	2	954.969
Mouse	P28843	1 - high confidence	IPN[115]NTQWITWSPEGHK	IPDNTQWITWSPEGHK	2	954.969
Mouse	P28843	1 - high confidence	KLDFIVLN[115]ETR	KLDFIVLDETR	2	674.88
Mouse	P29319	1 - high confidence	GSCVN[115]NSKEEDPPR	GSCVDNSKEEDPPR	2	795.35
Mouse	P29416	3 - unspecific	SAEGTFFIN[115]K	SAEGTFFIDK	2	557.777
Mouse	P29533	1 - high confidence	LDNEVLQLLSGN[115]ATLTL	LDNEVLQLLSGDATLTL	2	907.994
Mouse	P29533	1 - high confidence	KLDNEVLQLLSGN[115]ATLTLIAMR	KLDNEVLQLLSGDATLTLIAMR	2	1207.67
Mouse	P29533	1 - high confidence	QLNNGELQPLSEN[115]TTLTFMSTK	QLNNGELQPLSEDTTLTFMSTK	2	1234.11
Mouse	P29533	1 - high confidence	VSPSPILEEGSPVN[115]LTCSSDGIPAPK	VSPSPILEEGSPVDLTCSSDGIPAPK	2	1326.66
Mouse	P29533	1 - high confidence	SGN[115]ATLTLIAMR	SGDATLTLIAMR	2	624.837
Mouse	P29533	1 - high confidence	PVTVN[115]CTVPNVYPFDHLEIELLK	PVTVDCTVPNVYPFDHLEIELLK	2	1349.7
Mouse	P29533	1 - high confidence	ETTIWVSPSPILEEGSPVN[115]LTCSSDGIPAPK	ETTIWVSPSPILEEGSPVDLTCSSDGIPAPK	2	1641.81
Mouse	P29533	1 - high confidence	SEN[115]TTLTFMSTK	SEDTTLTFMSTK	2	680.822
[truncated: 9,865 more rows]

## Sheet: Table C
Protein	Proteotypicity	Peptide sequence with modifications/Charge	Charge	pI	Q1 m/z	Q1 intensity	Q3	Q3 rel. intensity	Ions
A1A5B4	1	DFQDPDGIEGSEN[115]VTLC[160]R/2	2	3.77	1026.94	2317.6	1165.52	10000	y10
A1A5B4	1	DFQDPDGIEGSEN[115]VTLC[160]R/2	2	3.77	1026.94	2317.6	549.281	5036.73	y4
A1A5B4	1	DFQDPDGIEGSEN[115]VTLC[160]R/2	2	3.77	1026.94	2317.6	774.354	4677.7	y14^2,b7
A1A5B4	1	DFQDPDGIEGSEN[115]VTLC[160]R/2	2	3.77	1026.94	2317.6	763.377	2339.33	y6
A1A5B4	1	DFQDPDGIEGSEN[115]VTLC[160]R/2	2	3.77	1026.94	2317.6	1335.62	1562.88	y12
A1A5B4	1	DFQDPDGIEGSEN[115]VTLC[160]R/2	2	3.77	1026.94	2317.6	831.867	1289.88	y15^2
A1A5B4	1	DFQDPDGIEGSEN[115]VTLC[160]R/2	2	3.77	1026.94	2317.6	648.35	1205.56	y5
A1A5B4	1	DFQDPDGIEGSEN[115]VTLC[160]R/2	2	3.77	1026.94	2317.6	979.451	1189.99	y8
A1A5B4	1	DFQDPDGIEGSEN[115]VTLC[160]R/2	2	3.77	1026.94	2317.6	448.234	1150.67	y3
A1A5B4	1	DFQDPDGIEGSEN[115]VTLC[160]R/2	2	3.77	1026.94	2317.6	892.419	1112.56	y7
A1A5B4	1	EGN[115]STVDC[160]LK/2	2	4.37	562.25	1678.1	535.255	10000	y4
A1A5B4	1	EGN[115]STVDC[160]LK/2	2	4.37	562.25	1678.1	634.323	3281.06	y5
A1A5B4	1	EGN[115]STVDC[160]LK/2	2	4.37	562.25	1678.1	735.37	1326.15	y6
A1A5B4	1	EGN[115]STVDC[160]LK/2	2	4.37	562.25	1678.1	960.361	963.45	b9-17,b9-18,y9-35
A1A5B4	1	EGN[115]STVDC[160]LK/2	2	4.37	562.25	1678.1	420.228	847.05	y3
A1A5B4	1	EGN[115]STVDC[160]LK/2	2	4.37	562.25	1678.1	822.403	542.68	y7
A1A5B4	1	EGN[115]STVDC[160]LK/2	2	4.37	562.25	1678.1	500.217	430.15	y4-35,y4-36
A1A5B4	1	EGN[115]STVDC[160]LK/2	2	4.37	562.25	1678.1	846.42	399.09	y8-91,b8-17,b8-18
A1A5B4	1	EGN[115]STVDC[160]LK/2	2	4.37	562.25	1678.1	518.228	377.08	y4-17,y4-18
A1A5C7	1	SN[115]SSGADGGDTPPLPSPPDK/2	2	3.93	948.927	1896	640.33	10000	y6,b8-36
A1A5C7	1	SN[115]SSGADGGDTPPLPSPPDK/2	2	3.93	948.927	1896	1257.52	6947.61	b14
A1A5C7	1	SN[115]SSGADGGDTPPLPSPPDK/2	2	3.93	948.927	1896	456.245	3797.49	y4,y9-35^2,y9-36^2
A1A5C7	1	SN[115]SSGADGGDTPPLPSPPDK/2	2	3.93	948.927	1896	1048.57	2893.34	y10
A1A5C7	1	SN[115]SSGADGGDTPPLPSPPDK/2	2	3.93	948.927	1896	1277.64	2145.68	y13
A1A5C7	1	SN[115]SSGADGGDTPPLPSPPDK/2	2	3.93	948.927	1896	849.286	2127.71	b10
A1A5C7	1	SN[115]SSGADGGDTPPLPSPPDK/2	2	3.93	948.927	1896	850.467	1621.75	y8
A1A5C7	1	SN[115]SSGADGGDTPPLPSPPDK/2	2	3.93	948.927	1896	1392.66	1496.15	y14
A1A5C7	1	SN[115]SSGADGGDTPPLPSPPDK/2	2	3.93	948.927	1896	818.36	1211.03	b18^2
A1A5C7	1	SN[115]SSGADGGDTPPLPSPPDK/2	2	3.93	948.927	1896	847.897	1147.75	y18^2
A1A5C7	1	SN[115]SSGADGGDTPPLPSPPDKGDN[115]ASNC[160]DC[160]R/3	3	3.97	1016.41	2282.9	895.857	10000	y16^2,a28^3
A1A5C7	1	SN[115]SSGADGGDTPPLPSPPDKGDN[115]ASNC[160]DC[160]R/3	3	3.97	1016.41	2282.9	803.815	9627.25	y14^2,y23-17^3,y23-18^3,b10-45,b10-46,a18^2,a26^3
A1A5C7	1	SN[115]SSGADGGDTPPLPSPPDKGDN[115]ASNC[160]DC[160]R/3	3	3.97	1016.41	2282.9	1049.45	5121.46	y19^2
A1A5C7	1	SN[115]SSGADGGDTPPLPSPPDKGDN[115]ASNC[160]DC[160]R/3	3	3.97	1016.41	2282.9	882.319	4251.4	y7
A1A5C7	1	SN[115]SSGADGGDTPPLPSPPDKGDN[115]ASNC[160]DC[160]R/3	3	3.97	1016.41	2282.9	1099.98	3505.57	y20^2,b13-44,b13-45,b24-36^2
A1A5C7	1	SN[115]SSGADGGDTPPLPSPPDKGDN[115]ASNC[160]DC[160]R/3	3	3.97	1016.41	2282.9	1214.51	3132.97	y23^2,b14-44
A1A5C7	1	SN[115]SSGADGGDTPPLPSPPDKGDN[115]ASNC[160]DC[160]R/3	3	3.97	1016.41	2282.9	1257.52	2141.44	b14
A1A5C7	1	SN[115]SSGADGGDTPPLPSPPDKGDN[115]ASNC[160]DC[160]R/3	3	3.97	1016.41	2282.9	1272.02	1631.5	y24^2
A1A5C7	1	SN[115]SSGADGGDTPPLPSPPDKGDN[115]ASNC[160]DC[160]R/3	3	3.97	1016.41	2282.9	811.282	1147.93	y6
A1A5C7	1	SN[115]SSGADGGDTPPLPSPPDKGDN[115]ASNC[160]DC[160]R/3	3	3.97	1016.41	2282.9	1169.39	1090.49	y10,y23-91^2,y22-35^2
A2RU67	1	APDSN[115]C[160]SNLLITTR/2	2	5.89	781.878	2116.5	490.298	8251.73	y4
A2RU67	1	APDSN[115]C[160]SNLLITTR/2	2	5.89	781.878	2116.5	603.382	7577.01	y5
A2RU67	1	APDSN[115]C[160]SNLLITTR/2	2	5.89	781.878	2116.5	1077.57	6922.51	y9
A2RU67	1	APDSN[115]C[160]SNLLITTR/2	2	5.89	781.878	2116.5	917.541	5733.61	y8
A2RU67	1	APDSN[115]C[160]SNLLITTR/2	2	5.89	781.878	2116.5	716.466	3055.36	y6,b7-17
A2RU67	1	APDSN[115]C[160]SNLLITTR/2	2	5.89	781.878	2116.5	830.509	2827.6	y7,b8-17
A2RU67	1	APDSN[115]C[160]SNLLITTR/2	2	5.89	781.878	2116.5	1279.63	2540.51	y11
A2RU67	1	APDSN[115]C[160]SNLLITTR/2	2	5.89	781.878	2116.5	1394.66	2202.72	y12
A2RU67	1	APDSN[115]C[160]SNLLITTR/2	2	5.89	781.878	2116.5	1192.6	1834.94	y10
A2RU67	1	APDSN[115]C[160]SNLLITTR/2	2	5.89	781.878	2116.5	415.758	1504.51	y7^2,b8-17^2,b8-18^2
A2RU67	1	YLSN[115]GTLAAPVVVLPDLDEDGVR/2	2	3.83	1207.63	4107.6	1015.47	7278.34	y9
A2RU67	1	YLSN[115]GTLAAPVVVLPDLDEDGVR/2	2	3.83	1207.63	4107.6	1128.55	5554.46	y10
A2RU67	1	YLSN[115]GTLAAPVVVLPDLDEDGVR/2	2	3.83	1207.63	4107.6	1326.69	2068.89	y12
A2RU67	1	YLSN[115]GTLAAPVVVLPDLDEDGVR/2	2	3.83	1207.63	4107.6	875.414	2008.95	b9-17,b9-18,y8-44
A2RU67	1	YLSN[115]GTLAAPVVVLPDLDEDGVR/2	2	3.83	1207.63	4107.6	1382.76	1463.89	b14-17,b14-18,y13-44
A2RU67	1	YLSN[115]GTLAAPVVVLPDLDEDGVR/2	2	3.83	1207.63	4107.6	803.389	876.19	y7,b8-17,b8-18
A2RU67	1	YLSN[115]GTLAAPVVVLPDLDEDGVR/2	2	3.83	1207.63	4107.6	1286.7	854.48	b13
A2RU67	1	YLSN[115]GTLAAPVVVLPDLDEDGVR/2	2	3.83	1207.63	4107.6	1181.62	836.02	y11-46
A2RU67	1	YLSN[115]GTLAAPVVVLPDLDEDGVR/2	2	3.83	1207.63	4107.6	1187.63	640.54	b12
A2RU67	1	YLSN[115]GTLAAPVVVLPDLDEDGVR/2	2	3.83	1207.63	4107.6	1017.52	494.83	y20-17^2,y20-18^2
A2VDJ0	1	DALSLQFEPVLLPTSTTN[115]FTK/2	2	4.37	1162.11	3860.9	997.484	10000	y9
A2VDJ0	1	DALSLQFEPVLLPTSTTN[115]FTK/2	2	4.37	1162.11	3860.9	1326.73	5747.61	b12
A2VDJ0	1	DALSLQFEPVLLPTSTTN[115]FTK/2	2	4.37	1162.11	3860.9	1110.57	3874.11	y10
A2VDJ0	1	DALSLQFEPVLLPTSTTN[115]FTK/2	2	4.37	1162.11	3860.9	1223.65	2052.72	y11
A2VDJ0	1	DALSLQFEPVLLPTSTTN[115]FTK/2	2	4.37	1162.11	3860.9	904.441	1987.1	b8,y16-17^2,y16-18^2
A2VDJ0	1	DALSLQFEPVLLPTSTTN[115]FTK/2	2	4.37	1162.11	3860.9	1213.65	1399.07	b11
A2VDJ0	1	DALSLQFEPVLLPTSTTN[115]FTK/2	2	4.37	1162.11	3860.9	799.383	440.25	y7
A2VDJ0	1	DALSLQFEPVLLPTSTTN[115]FTK/2	2	4.37	1162.11	3860.9	912.475	439.88	y16^2
A2VDJ0	1	DALSLQFEPVLLPTSTTN[115]FTK/2	2	4.37	1162.11	3860.9	1012.53	252.2	y18^2
A2VDJ0	1	DALSLQFEPVLLPTSTTN[115]FTK/2	2	4.37	1162.11	3860.9	969.017	230.88	y17^2
A2VDJ0	1	NN[115]LTVIDM[147]IGVEGFGAR/2	2	4.37	911.954	3531.1	1167.55	10000	y11
A2VDJ0	1	NN[115]LTVIDM[147]IGVEGFGAR/2	2	4.37	911.954	3531.1	1280.63	9334.65	y12,b12-35,b12-36
A2VDJ0	1	NN[115]LTVIDM[147]IGVEGFGAR/2	2	4.37	911.954	3531.1	792.4	8079.7	y8,b16-64^2
A2VDJ0	1	NN[115]LTVIDM[147]IGVEGFGAR/2	2	4.37	911.954	3531.1	1031.51	4986.8	b9
A2VDJ0	1	NN[115]LTVIDM[147]IGVEGFGAR/2	2	4.37	911.954	3531.1	636.31	4783.45	y6,b12-44^2,b12-45^2,b12-46^2
A2VDJ0	1	NN[115]LTVIDM[147]IGVEGFGAR/2	2	4.37	911.954	3531.1	1187.6	4283.19	b11
A2VDJ0	1	NN[115]LTVIDM[147]IGVEGFGAR/2	2	4.37	911.954	3531.1	1316.64	4244.09	b12,y13-64
A2VDJ0	1	NN[115]LTVIDM[147]IGVEGFGAR/2	2	4.37	911.954	3531.1	1052.52	4076.91	y10,b10-35,b10-36
A2VDJ0	1	NN[115]LTVIDM[147]IGVEGFGAR/2	2	4.37	911.954	3531.1	507.267	3491.89	y5,b9-17^2,b9-18^2,b5-35
A2VDJ0	1	NN[115]LTVIDM[147]IGVEGFGAR/2	2	4.37	911.954	3531.1	1379.7	2051.96	y13
A6NGN9	1	HYGN[115]YTC[160]R/2	2	8.59	536.219	352.5	771.309	10000	y6
A6NGN9	1	HYGN[115]YTC[160]R/2	2	8.59	536.219	352.5	599.261	3537.37	y4
A6NGN9	1	HYGN[115]YTC[160]R/2	2	8.59	536.219	352.5	934.372	3171.59	y7
A6NGN9	1	HYGN[115]YTC[160]R/2	2	8.59	536.219	352.5	473.178	1316.25	b4
A6NGN9	1	HYGN[115]YTC[160]R/2	2	8.59	536.219	352.5	449.163	539.97	b7^2,y7-36^2
A6NGN9	1	HYGN[115]YTC[160]R/2	2	8.59	536.219	352.5	436.197	490.11	y3
A6NGN9	1	HYGN[115]YTC[160]R/2	2	8.59	536.219	352.5	714.288	484.63	y5
A6NGN9	1	HYGN[115]YTC[160]R/2	2	8.59	536.219	352.5	636.241	470.45	b5
A6NGN9	1	HYGN[115]YTC[160]R/2	2	8.59	536.219	352.5	623.278	308.92	y5-91
A6NGN9	1	HYGN[115]YTC[160]R/2	2	8.59	536.219	352.5	669.266	308.31	y5-45,y5-46
A6NGN9	1	SM[147]LLFAN[115]VSAR/2	2	9.47	613.316	2669.1	765.389	10000	y7,a7
A6NGN9	1	SM[147]LLFAN[115]VSAR/2	2	9.47	613.316	2669.1	991.557	3826.26	y9
A6NGN9	1	SM[147]LLFAN[115]VSAR/2	2	9.47	613.316	2669.1	878.473	3500.75	y8
A6NGN9	1	SM[147]LLFAN[115]VSAR/2	2	9.47	613.316	2669.1	461.243	3056.67	b4
A6NGN9	1	SM[147]LLFAN[115]VSAR/2	2	9.47	613.316	2669.1	547.283	3022.96	y5,y10-44^2,y10-45^2,y10-46^2
A6NGN9	1	SM[147]LLFAN[115]VSAR/2	2	9.47	613.316	2669.1	432.257	2682.91	y4,a4,a8^2
A6NGN9	1	SM[147]LLFAN[115]VSAR/2	2	9.47	613.316	2669.1	583.283	2259.29	y6-35,y6-36
A6NGN9	1	SM[147]LLFAN[115]VSAR/2	2	9.47	613.316	2669.1	893.444	1795.59	b8
A6NGN9	1	SM[147]LLFAN[115]VSAR/2	2	9.47	613.316	2669.1	679.348	1634.93	b6
A6NGN9	1	SM[147]LLFAN[115]VSAR/2	2	9.47	613.316	2669.1	569.8	1222.23	y10^2
A6NI73	1	SGAADN[115]LSPSQN[115]K/2	2	5.56	645.794	2077	574.283	10000	y5,y11^2
A6NI73	1	SGAADN[115]LSPSQN[115]K/2	2	5.56	645.794	2077	661.315	7444.17	y6
A6NI73	1	SGAADN[115]LSPSQN[115]K/2	2	5.56	645.794	2077	626.278	3277.94	y6-35,y6-36
A6NI73	1	SGAADN[115]LSPSQN[115]K/2	2	5.56	645.794	2077	774.399	1902.56	y7
A6NI73	1	SGAADN[115]LSPSQN[115]K/2	2	5.56	645.794	2077	630.273	1041.93	b7
A6NI73	1	SGAADN[115]LSPSQN[115]K/2	2	5.56	645.794	2077	402.162	831.18	b5
A6NI73	1	SGAADN[115]LSPSQN[115]K/2	2	5.56	645.794	2077	602.278	817.59	y12^2,a7
A6NI73	1	SGAADN[115]LSPSQN[115]K/2	2	5.56	645.794	2077	1004.45	756.99	y9
A6NI73	1	SGAADN[115]LSPSQN[115]K/2	2	5.56	645.794	2077	529.736	593.61	y10-17^2,y10-18^2,y5-45
A6NI73	1	SGAADN[115]LSPSQN[115]K/2	2	5.56	645.794	2077	477.23	503.11	y4
A6NKL6	1	APGGVN[115]SSSAGAPR/2	2	9.8	614.799	949.9	579.281	10000	y13^2
A6NKL6	1	APGGVN[115]SSSAGAPR/2	2	9.8	614.799	949.9	847.39	7064.5	y9
A6NKL6	1	APGGVN[115]SSSAGAPR/2	2	9.8	614.799	949.9	732.364	3322.37	y8
A6NKL6	1	APGGVN[115]SSSAGAPR/2	2	9.8	614.799	949.9	1060.5	2663.81	y12
A6NKL6	1	APGGVN[115]SSSAGAPR/2	2	9.8	614.799	949.9	645.331	1661.33	y7
A6NKL6	1	APGGVN[115]SSSAGAPR/2	2	9.8	614.799	949.9	558.299	1323.08	y6
A6NKL6	1	APGGVN[115]SSSAGAPR/2	2	9.8	614.799	949.9	946.459	1287.82	y10
A6NKL6	1	APGGVN[115]SSSAGAPR/2	2	9.8	614.799	949.9	400.23	1274.84	y4,a10^2,y9-46^2
A6NKL6	1	APGGVN[115]SSSAGAPR/2	2	9.8	614.799	949.9	1003.48	955.44	y11
A6NKL6	1	APGGVN[115]SSSAGAPR/2	2	9.8	614.799	949.9	471.267	913.19	y5,b12-17^2
A6NKL6	1	PGGVN[115]SSSAGAPR/2	2	10.18	579.281	1012.4	732.364	10000	y8
A6NKL6	1	PGGVN[115]SSSAGAPR/2	2	10.18	579.281	1012.4	847.39	5044.95	y9
A6NKL6	1	PGGVN[115]SSSAGAPR/2	2	10.18	579.281	1012.4	426.198	3453.43	b5,y5-46,b11-34^2,b11-35^2,b11-36^2
A6NKL6	1	PGGVN[115]SSSAGAPR/2	2	10.18	579.281	1012.4	645.331	2149.18	y7
A6NKL6	1	PGGVN[115]SSSAGAPR/2	2	10.18	579.281	1012.4	400.23	1712.93	y4,b10-17^2,y9-46^2
A6NKL6	1	PGGVN[115]SSSAGAPR/2	2	10.18	579.281	1012.4	1003.48	670	y11
A6NKL6	1	PGGVN[115]SSSAGAPR/2	2	10.18	579.281	1012.4	465.22	577.04	y10-17^2,y10-18^2
A6NKL6	1	PGGVN[115]SSSAGAPR/2	2	10.18	579.281	1012.4	471.267	574.46	y5
A6NKL6	1	PGGVN[115]SSSAGAPR/2	2	10.18	579.281	1012.4	1060.5	555.51	y12
A6NKL6	1	PGGVN[115]SSSAGAPR/2	2	10.18	579.281	1012.4	946.459	553.09	y10,b12-36
A6NMZ7	1	EAN[115]QTQLR/2	2	6.1	480.741	156.9	517.309	1335.71	y4,a5
A6NMZ7	1	EAN[115]QTQLR/2	2	6.1	480.741	156.9	528.194	966.23	b5-17,b5-18
A6NMZ7	1	EAN[115]QTQLR/2	2	6.1	480.741	156.9	416.262	809.26	y3,y7^2,a4
A6NMZ7	1	EAN[115]QTQLR/2	2	6.1	480.741	156.9	427.146	528.24	b4-17,b4-18
A6NMZ7	1	EAN[115]QTQLR/2	2	6.1	480.741	156.9	760.395	338.11	y6
A6NMZ7	1	EAN[115]QTQLR/2	2	6.1	480.741	156.9	444.173	168.01	b4
A6NMZ7	1	EAN[115]QTQLR/2	2	6.1	480.741	156.9	510.183	158.28	b5-35
A6NMZ7	1	EAN[115]QTQLR/2	2	6.1	480.741	156.9	645.368	143.63	y5,a6
A6NMZ7	1	EAN[115]QTQLR/2	2	6.1	480.741	156.9	509.199	137.65	b5-36
A6NMZ7	1	EAN[115]QTQLR/2	2	6.1	480.741	156.9	407.706	109.92	y7-17^2,y7-18^2
A6NMZ7	1	TFADLAAHN[115]QTFLK/2	2	6.41	789.402	2415.8	888.457	5683.37	y7
A6NMZ7	1	TFADLAAHN[115]QTFLK/2	2	6.41	789.402	2415.8	959.495	5231.92	y8
A6NMZ7	1	TFADLAAHN[115]QTFLK/2	2	6.41	789.402	2415.8	1030.53	3536.05	y9
A6NMZ7	1	TFADLAAHN[115]QTFLK/2	2	6.41	789.402	2415.8	665.343	3060.59	y12^2
A6NMZ7	1	TFADLAAHN[115]QTFLK/2	2	6.41	789.402	2415.8	751.399	2155.07	y6
A6NMZ7	1	TFADLAAHN[115]QTFLK/2	2	6.41	789.402	2415.8	942.432	1677.79	b9,y8-17,y8-18
A6NMZ7	1	TFADLAAHN[115]QTFLK/2	2	6.41	789.402	2415.8	636.371	1599.59	y5,b12-45^2,b12-46^2
A6NMZ7	1	TFADLAAHN[115]QTFLK/2	2	6.41	789.402	2415.8	629.825	1202	y11^2
A6NMZ7	1	TFADLAAHN[115]QTFLK/2	2	6.41	789.402	2415.8	1143.62	1138.49	y10,a11
A6NMZ7	1	TFADLAAHN[115]QTFLK/2	2	6.41	789.402	2415.8	738.878	1017.95	y13^2
A6NMZ7	1	VGLVAYSN[115]ETK/2	2	5.97	591.306	1254.7	813.362	10000	y7
A6NMZ7	1	VGLVAYSN[115]ETK/2	2	5.97	591.306	1254.7	742.325	7131.64	y6
A6NMZ7	1	VGLVAYSN[115]ETK/2	2	5.97	591.306	1254.7	912.431	3592.95	y8
A6NMZ7	1	VGLVAYSN[115]ETK/2	2	5.97	591.306	1254.7	579.262	3154.42	y5
A6NMZ7	1	VGLVAYSN[115]ETK/2	2	5.97	591.306	1254.7	440.287	2250.29	b5
A6NMZ7	1	VGLVAYSN[115]ETK/2	2	5.97	591.306	1254.7	492.23	904.05	y4,y9-44^2
A6NMZ7	1	VGLVAYSN[115]ETK/2	2	5.97	591.306	1254.7	412.292	903.6	a5
A6NMZ7	1	VGLVAYSN[115]ETK/2	2	5.97	591.306	1254.7	513.261	652.64	y9^2
A6NMZ7	1	VGLVAYSN[115]ETK/2	2	5.97	591.306	1254.7	1082.54	464.76	y10
A6NMZ7	1	VGLVAYSN[115]ETK/2	2	5.97	591.306	1254.7	690.382	398.35	b7
A6NMZ7	1	VINSLSM[147]GIN[115]K/2	2	8.72	596.816	1168.1	409.707	10000	b8^2
A6NMZ7	1	VINSLSM[147]GIN[115]K/2	2	8.72	596.816	1168.1	666.313	4042.85	y6
A6NMZ7	1	VINSLSM[147]GIN[115]K/2	2	8.72	596.816	1168.1	980.472	3042.34	y9
A6NMZ7	1	VINSLSM[147]GIN[115]K/2	2	8.72	596.816	1168.1	866.429	1171.26	y8
A6NMZ7	1	VINSLSM[147]GIN[115]K/2	2	8.72	596.816	1168.1	490.74	1154.38	y9^2
A6NMZ7	1	VINSLSM[147]GIN[115]K/2	2	8.72	596.816	1168.1	527.319	976.84	b5
A6NMZ7	1	VINSLSM[147]GIN[115]K/2	2	8.72	596.816	1168.1	779.397	765.84	y7
A6NMZ7	1	VINSLSM[147]GIN[115]K/2	2	8.72	596.816	1168.1	432.245	695.23	y4
A6NMZ7	1	VINSLSM[147]GIN[115]K/2	2	8.72	596.816	1168.1	744.36	492.05	b7-17,b7-18,y7-35,y7-36
A6NMZ7	1	VINSLSM[147]GIN[115]K/2	2	8.72	596.816	1168.1	931.492	489.56	b9
A6NMZ7	1	VINSLSMGIN[115]K/2	2	8.72	588.818	1707.4	964.477	10000	y9
A6NMZ7	1	VINSLSMGIN[115]K/2	2	8.72	588.818	1707.4	650.318	6631.62	y6
A6NMZ7	1	VINSLSMGIN[115]K/2	2	8.72	588.818	1707.4	563.286	3227.66	y5
A6NMZ7	1	VINSLSMGIN[115]K/2	2	8.72	588.818	1707.4	546.259	2962.71	y5-17,y5-18
A6NMZ7	1	VINSLSMGIN[115]K/2	2	8.72	588.818	1707.4	763.402	2108.12	y7
A6NMZ7	1	VINSLSMGIN[115]K/2	2	8.72	588.818	1707.4	527.319	2078.67	b5,y5-35
A6NMZ7	1	VINSLSMGIN[115]K/2	2	8.72	588.818	1707.4	850.434	1901.57	y8
A6NMZ7	1	VINSLSMGIN[115]K/2	2	8.72	588.818	1707.4	947.45	1233.55	y9-17,y9-18
A6NMZ7	1	VINSLSMGIN[115]K/2	2	8.72	588.818	1707.4	524.771	1023.85	b10+18^2
A6NMZ7	1	VINSLSMGIN[115]K/2	2	8.72	588.818	1707.4	518.264	995.02	y5-45,y5-46,y10-44^2
A7MBM2	1	LATPWGLADN[115]YTSVTGMDLGLK/2	2	4.2	1162.58	3860.2	1020.54	10000	y10,y19^2
A7MBM2	1	LATPWGLADN[115]YTSVTGMDLGLK/2	2	4.2	1162.58	3860.2	1070.52	3200.07	y20^2,b21-36^2
A7MBM2	1	LATPWGLADN[115]YTSVTGMDLGLK/2	2	4.2	1162.58	3860.2	834.439	3102.47	y8
A7MBM2	1	LATPWGLADN[115]YTSVTGMDLGLK/2	2	4.2	1162.58	3860.2	1121.59	1808.28	y11
A7MBM2	1	LATPWGLADN[115]YTSVTGMDLGLK/2	2	4.2	1162.58	3860.2	1399.68	1234.52	y13
A7MBM2	1	LATPWGLADN[115]YTSVTGMDLGLK/2	2	4.2	1162.58	3860.2	1284.65	1207.59	y12
A7MBM2	1	LATPWGLADN[115]YTSVTGMDLGLK/2	2	4.2	1162.58	3860.2	733.391	997.15	y7
A7MBM2	1	LATPWGLADN[115]YTSVTGMDLGLK/2	2	4.2	1162.58	3860.2	933.507	991.72	y9,a18^2
A7MBM2	1	LATPWGLADN[115]YTSVTGMDLGLK/2	2	4.2	1162.58	3860.2	545.329	951.47	y5
A7MBM2	1	LATPWGLADN[115]YTSVTGMDLGLK/2	2	4.2	1162.58	3860.2	676.37	799.4	y6,y13-46^2
A7MBM2	1	LLFLSPDLELN[115]SSSSHNTLRPAP/3	3	5.33	837.103	3918.4	1142.07	10000	y21^2,b10
A7MBM2	1	LLFLSPDLELN[115]SSSSHNTLRPAP/3	3	5.33	837.103	3918.4	1011.99	9557.54	y19^2,b9-17,b19-46^2
A7MBM2	1	LLFLSPDLELN[115]SSSSHNTLRPAP/3	3	5.33	837.103	3918.4	968.474	7162.93	y18^2
A7MBM2	1	LLFLSPDLELN[115]SSSSHNTLRPAP/3	3	5.33	837.103	3918.4	1068.53	5727.35	y20^2
A7MBM2	1	LLFLSPDLELN[115]SSSSHNTLRPAP/3	3	5.33	837.103	3918.4	761.713	3337.11	y21^3
A7MBM2	1	LLFLSPDLELN[115]SSSSHNTLRPAP/3	3	5.33	837.103	3918.4	897.953	693.73	y17-44^2,y17-45^2
A7MBM2	1	LLFLSPDLELN[115]SSSSHNTLRPAP/3	3	5.33	837.103	3918.4	1121.57	662.89	y11-45,y11-46
A7MBM2	1	LLFLSPDLELN[115]SSSSHNTLRPAP/3	3	5.33	837.103	3918.4	798.748	587.11	b22^3,y22^3
A7MBM2	1	LLFLSPDLELN[115]SSSSHNTLRPAP/3	3	5.33	837.103	3918.4	1003.48	572.62	y19-17^2,y19-18^2
A7MBM2	1	LLFLSPDLELN[115]SSSSHNTLRPAP/3	3	5.33	837.103	3918.4	975.501	535.61	y9-17,y9-18
A7MBM2	1	LLFLSPDLELN[115]SSSSHNTLRPAPR/3	3	6.75	889.136	3028.5	1090.04	10000	y20^2,b20-46^2
A7MBM2	1	LLFLSPDLELN[115]SSSSHNTLRPAPR/3	3	6.75	889.136	3028.5	1046.52	7232.96	y19^2
A7MBM2	1	LLFLSPDLELN[115]SSSSHNTLRPAPR/3	3	6.75	889.136	3028.5	1220.12	7139.84	y22^2,b11-36
A7MBM2	1	LLFLSPDLELN[115]SSSSHNTLRPAPR/3	3	6.75	889.136	3028.5	1146.58	3330.93	y21^2
A7MBM2	1	LLFLSPDLELN[115]SSSSHNTLRPAPR/3	3	6.75	889.136	3028.5	813.747	2953.54	y22^3
A7MBM2	1	LLFLSPDLELN[115]SSSSHNTLRPAPR/3	3	6.75	889.136	3028.5	727.029	1215.79	y20^3,b20-45^3,b20-46^3
A7MBM2	1	LLFLSPDLELN[115]SSSSHNTLRPAPR/3	3	6.75	889.136	3028.5	574.818	342.32	y10^2,b5,b16-17^3,b16-18^3,y16-44^3,y16-45^3,y16-46^3
A7MBM2	1	LLFLSPDLELN[115]SSSSHNTLRPAPR/3	3	6.75	889.136	3028.5	851.442	271.67	y23^3
A7MBM2	1	LLFLSPDLELN[115]SSSSHNTLRPAPR/3	3	6.75	889.136	3028.5	940.485	269.92	y17^2
A7MBM2	1	LLFLSPDLELN[115]SSSSHNTLRPAPR/3	3	6.75	889.136	3028.5	627.326	239.71	y17^3
A7MBM2	1	LSPDLELN[115]SSSSHNTLRPAPR/3	3	6.75	764.724	1842.5	698.019	10000	y19^3,a20^3
A7MBM2	1	LSPDLELN[115]SSSSHNTLRPAPR/3	3	6.75	764.724	1842.5	1046.52	1276.43	y19^2,a20^2
A7MBM2	1	LSPDLELN[115]SSSSHNTLRPAPR/3	3	6.75	764.724	1842.5	819.421	776.9	y15^2
A7MBM2	1	LSPDLELN[115]SSSSHNTLRPAPR/3	3	6.75	764.724	1842.5	705.366	725.74	y13^2
A7MBM2	1	LSPDLELN[115]SSSSHNTLRPAPR/3	3	6.75	764.724	1842.5	883.943	526.6	y16^2,b8
A7MBM2	1	LSPDLELN[115]SSSSHNTLRPAPR/3	3	6.75	764.724	1842.5	727.029	479.54	y20^3
A7MBM2	1	LSPDLELN[115]SSSSHNTLRPAPR/3	3	6.75	764.724	1842.5	627.326	336.28	y17^3,a6
A7MBM2	1	LSPDLELN[115]SSSSHNTLRPAPR/3	3	6.75	764.724	1842.5	997.998	324.67	y18^2,a19^2
A7MBM2	1	LSPDLELN[115]SSSSHNTLRPAPR/3	3	6.75	764.724	1842.5	940.485	252.36	y17^2
A7MBM2	1	LSPDLELN[115]SSSSHNTLRPAPR/3	3	6.75	764.724	1842.5	727.841	174.51	a14^2
A7MBM2	1	SN[115]SSLVRDPAFSASGPEAQR/3	3	5.79	693.003	1759.4	657.332	7124.27	y6,y13-17^2,y13-18^2,b13-18^2,y19-17^3,y19-18^3
A7MBM2	1	SN[115]SSLVRDPAFSASGPEAQR/3	3	5.79	693.003	1759.4	600.31	6316.02	y5,y12-17^2,y12-18^2
A7MBM2	1	SN[115]SSLVRDPAFSASGPEAQR/3	3	5.79	693.003	1759.4	744.364	6219.88	y7,y14^2
A7MBM2	1	SN[115]SSLVRDPAFSASGPEAQR/3	3	5.79	693.003	1759.4	667.323	5097.15	b13^2,y13^2
A7MBM2	1	SN[115]SSLVRDPAFSASGPEAQR/3	3	5.79	693.003	1759.4	739.35	3761.72	b15^2
A7MBM2	1	SN[115]SSLVRDPAFSASGPEAQR/3	3	5.79	693.003	1759.4	588.288	3492.23	b11^2,b6,y12-44^2
A7MBM2	1	SN[115]SSLVRDPAFSASGPEAQR/3	3	5.79	693.003	1759.4	872.461	3152.38	y17-44^2,y17-45^2
A7MBM2	1	SN[115]SSLVRDPAFSASGPEAQR/3	3	5.79	693.003	1759.4	631.804	3107.38	b12^2
A7MBM2	1	SN[115]SSLVRDPAFSASGPEAQR/3	3	5.79	693.003	1759.4	873.918	2665.41	a18^2
A7MBM2	1	SN[115]SSLVRDPAFSASGPEAQR/3	3	5.79	693.003	1759.4	815.401	2022.31	y8,b8-45,b8-46
A8MVW0	1	ASVDVFGN[115]R/2	2	5.89	483.238	1958.1	494.236	6715.45	y4
A8MVW0	1	ASVDVFGN[115]R/2	2	5.89	483.238	1958.1	708.331	6448.4	y6
A8MVW0	1	ASVDVFGN[115]R/2	2	5.89	483.238	1958.1	472.24	4116.68	b5
A8MVW0	1	ASVDVFGN[115]R/2	2	5.89	483.238	1958.1	807.399	2741.81	y7
A8MVW0	1	ASVDVFGN[115]R/2	2	5.89	483.238	1958.1	593.304	2561.79	y5
A8MVW0	1	ASVDVFGN[115]R/2	2	5.89	483.238	1958.1	404.203	2477.59	y7^2,b8+18^2
A8MVW0	1	ASVDVFGN[115]R/2	2	5.89	483.238	1958.1	447.719	1429.27	y8^2,y4-46
A8MVW0	1	ASVDVFGN[115]R/2	2	5.89	483.238	1958.1	619.309	1030.21	b6
A8MVW0	1	ASVDVFGN[115]R/2	2	5.89	483.238	1958.1	444.245	884.01	a5
A8MVW0	1	ASVDVFGN[115]R/2	2	5.89	483.238	1958.1	676.33	466.24	b7
A8MVW5	1	VNIQGN[115]GTLSASQK/2	2	8.72	709.368	1126.7	963.474	10000	y10
A8MVW5	1	VNIQGN[115]GTLSASQK/2	2	8.72	709.368	1126.7	602.812	4162.82	y12^2
A8MVW5	1	VNIQGN[115]GTLSASQK/2	2	8.72	709.368	1126.7	659.833	2909.41	y13^2
A8MVW5	1	VNIQGN[115]GTLSASQK/2	2	8.72	709.368	1126.7	791.426	2593.38	y8
A8MVW5	1	VNIQGN[115]GTLSASQK/2	2	8.72	709.368	1126.7	906.453	2234.37	y9
A8MVW5	1	VNIQGN[115]GTLSASQK/2	2	8.72	709.368	1126.7	1091.53	2161.02	y11
A8MVW5	1	VNIQGN[115]GTLSASQK/2	2	8.72	709.368	1126.7	633.357	2140.71	y6
A8MVW5	1	VNIQGN[115]GTLSASQK/2	2	8.72	709.368	1126.7	627.31	1773.8	b6,b13-17^2,b13-18^2
A8MVW5	1	VNIQGN[115]GTLSASQK/2	2	8.72	709.368	1126.7	898.463	1243.94	b9
A8MVW5	1	VNIQGN[115]GTLSASQK/2	2	8.72	709.368	1126.7	520.273	1151.33	y5,b11-17^2,b11-18^2
A8MWY0	1	M[147]ALC[160]TNN[115]ITDFTVK/2	2	5.83	822.884	2559.7	1313.6	10000	y11
A8MWY0	1	M[147]ALC[160]TNN[115]ITDFTVK/2	2	5.83	822.884	2559.7	1153.57	6245.16	y10
A8MWY0	1	M[147]ALC[160]TNN[115]ITDFTVK/2	2	5.83	822.884	2559.7	710.372	3908.53	y6
A8MWY0	1	M[147]ALC[160]TNN[115]ITDFTVK/2	2	5.83	822.884	2559.7	1052.53	3758.28	y9
A8MWY0	1	M[147]ALC[160]TNN[115]ITDFTVK/2	2	5.83	822.884	2559.7	713.848	3298.8	y12^2
A8MWY0	1	M[147]ALC[160]TNN[115]ITDFTVK/2	2	5.83	822.884	2559.7	938.483	3105.28	y8
A8MWY0	1	M[147]ALC[160]TNN[115]ITDFTVK/2	2	5.83	822.884	2559.7	609.324	2851.38	y5,b11-82^2
A8MWY0	1	M[147]ALC[160]TNN[115]ITDFTVK/2	2	5.83	822.884	2559.7	635.776	2098.27	a11^2,y11-44^2,y11-45^2
A8MWY0	1	M[147]ALC[160]TNN[115]ITDFTVK/2	2	5.83	822.884	2559.7	494.297	2049.88	y4
A8MWY0	1	M[147]ALC[160]TNN[115]ITDFTVK/2	2	5.83	822.884	2559.7	1151.47	1870.47	b10
A8TX70	1	TQIQN[115]VSK/2	2	8.42	459.748	1789.8	689.383	10000	y6
A8TX70	1	TQIQN[115]VSK/2	2	8.42	459.748	1789.8	576.299	2477.79	y5
A8TX70	1	TQIQN[115]VSK/2	2	8.42	459.748	1789.8	448.24	668.21	y4
A8TX70	1	TQIQN[115]VSK/2	2	8.42	459.748	1789.8	586.283	400.82	b5
A8TX70	1	TQIQN[115]VSK/2	2	8.42	459.748	1789.8	409.224	309.26	y7^2
A8TX70	1	TQIQN[115]VSK/2	2	8.42	459.748	1789.8	431.214	263.35	y4-17,y4-18
A8TX70	1	TQIQN[115]VSK/2	2	8.42	459.748	1789.8	685.351	187.19	b6
A8TX70	1	TQIQN[115]VSK/2	2	8.42	459.748	1789.8	772.384	173.48	b7,y7-45,y7-46
A8TX70	1	TQIQN[115]VSK/2	2	8.42	459.748	1789.8	443.261	161.26	a4
A8TX70	1	TQIQN[115]VSK/2	2	8.42	459.748	1789.8	559.272	139.14	y5-17,y5-18,a5
O00206	1	LPEYFSN[115]LTNLEHLDLSSNK/3	3	4.66	779.053	3622.1	742.391	10000	y13^2
O00206	1	LPEYFSN[115]LTNLEHLDLSSNK/3	3	4.66	779.053	3622.1	998.486	4091.89	y17^2,y9-44,y9-45
O00206	1	LPEYFSN[115]LTNLEHLDLSSNK/3	3	4.66	779.053	3622.1	916.955	3462.67	y16^2
O00206	1	LPEYFSN[115]LTNLEHLDLSSNK/3	3	4.66	779.053	3622.1	843.421	2750.74	y15^2
O00206	1	LPEYFSN[115]LTNLEHLDLSSNK/3	3	4.66	779.053	3622.1	799.905	927.93	y14^2
O00206	1	LPEYFSN[115]LTNLEHLDLSSNK/3	3	4.66	779.053	3622.1	913.474	836.47	y8
O00206	1	LPEYFSN[115]LTNLEHLDLSSNK/3	3	4.66	779.053	3622.1	548.304	796.55	y5,a14^3,y15-44^3,y15-45^3
O00206	1	LPEYFSN[115]LTNLEHLDLSSNK/3	3	4.66	779.053	3622.1	663.331	741.57	y6,b17^3,y12-44^2,y12-45^2,y12-46^2
O00206	1	LPEYFSN[115]LTNLEHLDLSSNK/3	3	4.66	779.053	3622.1	685.849	652.72	y12^2,b18-17^3,b18-18^3
O00206	1	LPEYFSN[115]LTNLEHLDLSSNK/3	3	4.66	779.053	3622.1	1042.52	506.78	y9
O00206	1	SALEGLC[160]N[115]LTIEEFR/2	2	4.25	876.927	3534.1	789.871	6539.6	b14^2,y13-17^2,y13-18^2
O00206	1	SALEGLC[160]N[115]LTIEEFR/2	2	4.25	876.927	3534.1	846.366	2597.69	b8
O00206	1	SALEGLC[160]N[115]LTIEEFR/2	2	4.25	876.927	3534.1	580.273	1624.39	y4
O00206	1	SALEGLC[160]N[115]LTIEEFR/2	2	4.25	876.927	3534.1	1182.55	1537.4	y9
O00206	1	SALEGLC[160]N[115]LTIEEFR/2	2	4.25	876.927	3534.1	794.404	1432.25	y6
O00206	1	SALEGLC[160]N[115]LTIEEFR/2	2	4.25	876.927	3534.1	658.319	1375.29	y5-35,y5-36,y11-35^2,y11-36^2
O00206	1	SALEGLC[160]N[115]LTIEEFR/2	2	4.25	876.927	3534.1	732.837	1281.04	y12-17^2,y12-18^2
O00206	1	SALEGLC[160]N[115]LTIEEFR/2	2	4.25	876.927	3534.1	931.455	1155.82	a9
O00206	1	SALEGLC[160]N[115]LTIEEFR/2	2	4.25	876.927	3534.1	775.874	1055.68	a14^2,y13-45^2,y13-46^2
O00206	1	SALEGLC[160]N[115]LTIEEFR/2	2	4.25	876.927	3534.1	781.358	1032.72	b14-17^2,b14-18^2,y13-35^2
O00241	1	GLQLTWLENGN[115]VSR/2	2	6.01	794.41	3571.5	889.437	4936.9	y8
O00241	1	GLQLTWLENGN[115]VSR/2	2	6.01	794.41	3571.5	1075.52	4513.82	y9
O00241	1	GLQLTWLENGN[115]VSR/2	2	6.01	794.41	3571.5	1289.65	4380.87	y11
O00241	1	GLQLTWLENGN[115]VSR/2	2	6.01	794.41	3571.5	1176.56	4140.4	y10
O00241	1	GLQLTWLENGN[115]VSR/2	2	6.01	794.41	3571.5	709.357	3211.09	y12^2
O00241	1	GLQLTWLENGN[115]VSR/2	2	6.01	794.41	3571.5	941.509	2542.66	b8
O00241	1	GLQLTWLENGN[115]VSR/2	2	6.01	794.41	3571.5	759.327	1535.2	y7-17,y7-18
O00241	1	GLQLTWLENGN[115]VSR/2	2	6.01	794.41	3571.5	533.268	1372.6	y5,b10-46^2
O00241	1	GLQLTWLENGN[115]VSR/2	2	6.01	794.41	3571.5	513.303	1353.88	b5,a9^2
O00241	1	GLQLTWLENGN[115]VSR/2	2	6.01	794.41	3571.5	412.255	1172.15	b4
O00241;Q9P1W8	2	GTAN[115]LSEAIR/2	2	6.01	516.77	1866	575.315	9232.9	y5
O00241;Q9P1W8	2	GTAN[115]LSEAIR/2	2	6.01	516.77	1866	458.224	6289.8	b5
O00241;Q9P1W8	2	GTAN[115]LSEAIR/2	2	6.01	516.77	1866	858.42	3392.04	b9,y8-17
O00241;Q9P1W8	2	GTAN[115]LSEAIR/2	2	6.01	516.77	1866	488.283	3241.94	y4,y9^2
O00241;Q9P1W8	2	GTAN[115]LSEAIR/2	2	6.01	516.77	1866	803.426	2808.58	y7
O00241;Q9P1W8	2	GTAN[115]LSEAIR/2	2	6.01	516.77	1866	688.399	2623.09	y6
O00241;Q9P1W8	2	GTAN[115]LSEAIR/2	2	6.01	516.77	1866	874.463	2250.25	y8
O00241;Q9P1W8	2	GTAN[115]LSEAIR/2	2	6.01	516.77	1866	437.735	1756.95	y8^2,b9+18^2
O00241;Q9P1W8	2	GTAN[115]LSEAIR/2	2	6.01	516.77	1866	545.257	1534.06	b6
O00241;Q9P1W8	2	GTAN[115]LSEAIR/2	2	6.01	516.77	1866	745.336	1443.88	b8
O00300	1	HIGHAN[115]LTFEQLR/3	3	6.92	512.935	2947.8	692.373	10000	y5,y12-17^2
O00300	1	HIGHAN[115]LTFEQLR/3	3	6.92	512.935	2947.8	545.304	7154.13	y4
O00300	1	HIGHAN[115]LTFEQLR/3	3	6.92	512.935	2947.8	793.42	6357.52	y6
O00300	1	HIGHAN[115]LTFEQLR/3	3	6.92	512.935	2947.8	423.217	6247.1	b8^2,y11-17^3,y11-18^3
O00300	1	HIGHAN[115]LTFEQLR/3	3	6.92	512.935	2947.8	416.262	2612.81	y3,b11^3,a4
O00300	1	HIGHAN[115]LTFEQLR/3	3	6.92	512.935	2947.8	643.828	2362.07	y11^2
O00300	1	HIGHAN[115]LTFEQLR/3	3	6.92	512.935	2947.8	631.295	1791.23	b6
O00300	1	HIGHAN[115]LTFEQLR/3	3	6.92	512.935	2947.8	906.504	1523.05	y7
O00300	1	HIGHAN[115]LTFEQLR/3	3	6.92	512.935	2947.8	744.379	1345.89	b7
O00300	1	HIGHAN[115]LTFEQLR/3	3	6.92	512.935	2947.8	561.272	1343.86	b10^2
O00391	1	N[115]STLDPGKPEM[147]M[147]K/2	2	6.06	740.837	1028.8	949.448	9529.77	y8
O00391	1	N[115]STLDPGKPEM[147]M[147]K/2	2	6.06	740.837	1028.8	667.279	3152.75	y5,b12^2
O00391	1	N[115]STLDPGKPEM[147]M[147]K/2	2	6.06	740.837	1028.8	885.45	2738.71	y8-64
O00391	1	N[115]STLDPGKPEM[147]M[147]K/2	2	6.06	740.837	1028.8	475.228	2463.9	y8^2
O00391	1	N[115]STLDPGKPEM[147]M[147]K/2	2	6.06	740.837	1028.8	683.323	2106.01	y12^2
O00391	1	N[115]STLDPGKPEM[147]M[147]K/2	2	6.06	740.837	1028.8	532.741	2062.84	y9^2,b5
O00391	1	N[115]STLDPGKPEM[147]M[147]K/2	2	6.06	740.837	1028.8	676.789	1859.61	b12+18^2
O00391	1	N[115]STLDPGKPEM[147]M[147]K/2	2	6.06	740.837	1028.8	603.281	1292.37	y5-64
O00391	1	N[115]STLDPGKPEM[147]M[147]K/2	2	6.06	740.837	1028.8	441.184	756.88	y3
O00391	1	N[115]STLDPGKPEM[147]M[147]K/2	2	6.06	740.837	1028.8	1064.48	725.14	y9
O00398	1	M[147]GSN[115]STSTAEIYC[160]N[115]VTNVK/2	2	6	1047.45	2579.4	998.461	10000	y8
O00398	1	M[147]GSN[115]STSTAEIYC[160]N[115]VTNVK/2	2	6	1047.45	2579.4	1259.51	7244.99	b12
O00398	1	M[147]GSN[115]STSTAEIYC[160]N[115]VTNVK/2	2	6	1047.45	2579.4	835.398	5412.44	y7,b9-18,b16-64^2,y15-17^2,y15-18^2
O00398	1	M[147]GSN[115]STSTAEIYC[160]N[115]VTNVK/2	2	6	1047.45	2579.4	1311.62	4321.54	y11
O00398	1	M[147]GSN[115]STSTAEIYC[160]N[115]VTNVK/2	2	6	1047.45	2579.4	856.405	4285.84	y16-91^2
O00398	1	M[147]GSN[115]STSTAEIYC[160]N[115]VTNVK/2	2	6	1047.45	2579.4	818.371	3301.97	y7-17,y7-18,b9-35,b9-36
O00398	1	M[147]GSN[115]STSTAEIYC[160]N[115]VTNVK/2	2	6	1047.45	2579.4	1111.55	3110.41	y9
O00398	1	M[147]GSN[115]STSTAEIYC[160]N[115]VTNVK/2	2	6	1047.45	2579.4	1094.52	2380.21	y9-17,y9-18
O00398	1	M[147]GSN[115]STSTAEIYC[160]N[115]VTNVK/2	2	6	1047.45	2579.4	461.272	1959.21	y4
O00398	1	M[147]GSN[115]STSTAEIYC[160]N[115]VTNVK/2	2	6	1047.45	2579.4	654.24	1818	a7
O00398	1	M[147]GSN[115]STSTAEIYC[160]N[115]VTNVK/3	3	6	698.638	2590.1	973.936	7285.44	y18^2,b18^2
O00398	1	M[147]GSN[115]STSTAEIYC[160]N[115]VTNVK/3	3	6	698.638	2590.1	998.461	6073.91	y8
O00398	1	M[147]GSN[115]STSTAEIYC[160]N[115]VTNVK/3	3	6	698.638	2590.1	499.734	4648.59	y8^2,y13^3,b14-35^3,b14-36^3
O00398	1	M[147]GSN[115]STSTAEIYC[160]N[115]VTNVK/3	3	6	698.638	2590.1	817.322	4174.59	b15^2,y7-18,b9-36
O00398	1	M[147]GSN[115]STSTAEIYC[160]N[115]VTNVK/3	3	6	698.638	2590.1	783.283	3993.39	b8,y14-35^2,y14-36^2
O00398	1	M[147]GSN[115]STSTAEIYC[160]N[115]VTNVK/3	3	6	698.638	2590.1	560.34	3428.16	y5,b6-35
O00398	1	M[147]GSN[115]STSTAEIYC[160]N[115]VTNVK/3	3	6	698.638	2590.1	418.203	3281.65	y7^2,b9-17^2,b9-18^2,y4-44
O00398	1	M[147]GSN[115]STSTAEIYC[160]N[115]VTNVK/3	3	6	698.638	2590.1	1096.45	3009.25	b11
O00398	1	M[147]GSN[115]STSTAEIYC[160]N[115]VTNVK/3	3	6	698.638	2590.1	803.324	2560.15	a15^2
O00398	1	M[147]GSN[115]STSTAEIYC[160]N[115]VTNVK/3	3	6	698.638	2590.1	835.398	2044.56	y7,y15-17^2,y15-18^2,b9-18,b16-64^2
O00451	1	AIQAFGN[115]GTDVN[115]VSPK/2	2	5.89	810.399	2052.2	1089.51	4249.42	y11
O00451	1	AIQAFGN[115]GTDVN[115]VSPK/2	2	5.89	810.399	2052.2	545.293	2417.29	y5,y11^2
O00451	1	AIQAFGN[115]GTDVN[115]VSPK/2	2	5.89	810.399	2052.2	1075.51	2217.7	b11
O00451	1	AIQAFGN[115]GTDVN[115]VSPK/2	2	5.89	810.399	2052.2	917.457	1811.2	y9
O00451	1	AIQAFGN[115]GTDVN[115]VSPK/2	2	5.89	810.399	2052.2	718.339	1724.38	y14^2
O00451	1	AIQAFGN[115]GTDVN[115]VSPK/2	2	5.89	810.399	2052.2	759.388	1511.27	y7,b8
O00451	1	AIQAFGN[115]GTDVN[115]VSPK/2	2	5.89	810.399	2052.2	703.341	1305.35	b7
O00451	1	AIQAFGN[115]GTDVN[115]VSPK/2	2	5.89	810.399	2052.2	1032.48	973.28	y10,b11-44
O00451	1	AIQAFGN[115]GTDVN[115]VSPK/2	2	5.89	810.399	2052.2	644.361	874.59	y6,b13^2,y13-18^2
O00451	1	AIQAFGN[115]GTDVN[115]VSPK/2	2	5.89	810.399	2052.2	774.881	851.23	y15^2
O00451	1	ANELC[160]AAESN[115]C[160]SSR/2	2	4.53	785.317	874	840.315	9093.17	y7
O00451	1	ANELC[160]AAESN[115]C[160]SSR/2	2	4.53	785.317	874	911.352	6915.59	y8,b9-34,b9-35,b9-36
O00451	1	ANELC[160]AAESN[115]C[160]SSR/2	2	4.53	785.317	874	624.241	6657.03	y5,b6-34,b6-35
O00451	1	ANELC[160]AAESN[115]C[160]SSR/2	2	4.53	785.317	874	982.389	6602.96	y9
O00451	1	ANELC[160]AAESN[115]C[160]SSR/2	2	4.53	785.317	874	730.319	3816.2	b7
O00451	1	ANELC[160]AAESN[115]C[160]SSR/2	2	4.53	785.317	874	859.361	2931.21	b8
O00451	1	ANELC[160]AAESN[115]C[160]SSR/2	2	4.53	785.317	874	509.214	2625.5	y4,b10-44^2,b10-45^2
O00451	1	ANELC[160]AAESN[115]C[160]SSR/2	2	4.53	785.317	874	946.394	1754.28	b9,y9-35,y9-36
O00451	1	ANELC[160]AAESN[115]C[160]SSR/2	2	4.53	785.317	874	1061.42	1720.82	b10
O00451	1	ANELC[160]AAESN[115]C[160]SSR/2	2	4.53	785.317	874	1255.5	1518.69	y11
O00451	1	NAIQAFGN[115]GTDVN[115]VSPK/2	2	5.83	867.421	2343	545.293	4928.5	y5,y11^2,b11^2
O00451	1	NAIQAFGN[115]GTDVN[115]VSPK/2	2	5.83	867.421	2343	1189.55	3688.98	b12
O00451	1	NAIQAFGN[115]GTDVN[115]VSPK/2	2	5.83	867.421	2343	1307.61	3390.17	y13
O00451	1	NAIQAFGN[115]GTDVN[115]VSPK/2	2	5.83	867.421	2343	1089.51	3358.95	y11,b11
O00451	1	NAIQAFGN[115]GTDVN[115]VSPK/2	2	5.83	867.421	2343	774.881	2915.63	y15^2
O00451	1	NAIQAFGN[115]GTDVN[115]VSPK/2	2	5.83	867.421	2343	817.384	2766.92	b8,y8-44
O00451	1	NAIQAFGN[115]GTDVN[115]VSPK/2	2	5.83	867.421	2343	1236.57	2590.3	y12
O00451	1	NAIQAFGN[115]GTDVN[115]VSPK/2	2	5.83	867.421	2343	718.339	2586	y14^2
O00451	1	NAIQAFGN[115]GTDVN[115]VSPK/2	2	5.83	867.421	2343	644.361	1760.44	y6,b6,b13-17^2,b13-18^2,y13-18^2
O00451	1	NAIQAFGN[115]GTDVN[115]VSPK/2	2	5.83	867.421	2343	917.457	1595.37	y9
O00461	1	DPAEQQN[115]VTQVAHSPQGYNTAR/3	3	5.33	804.711	2045	1000.48	10000	y18^2
O00461	1	DPAEQQN[115]VTQVAHSPQGYNTAR/3	3	5.33	804.711	2045	1065	6955.32	y19^2,b20-36^2
O00461	1	DPAEQQN[115]VTQVAHSPQGYNTAR/3	3	5.33	804.711	2045	872.424	6480.3	y16^2,b17-44^2,b17-45^2,b17-46^2
O00461	1	DPAEQQN[115]VTQVAHSPQGYNTAR/3	3	5.33	804.711	2045	936.453	5643.98	y17^2
O00461	1	DPAEQQN[115]VTQVAHSPQGYNTAR/3	3	5.33	804.711	2045	765.376	5560.37	y14^2,y21^3,b7-18,y7-44
O00461	1	DPAEQQN[115]VTQVAHSPQGYNTAR/3	3	5.33	804.711	2045	1100.52	5175.59	y20^2,b21-36^2
O00461	1	DPAEQQN[115]VTQVAHSPQGYNTAR/3	3	5.33	804.711	2045	906.443	4363.57	y8
O00461	1	DPAEQQN[115]VTQVAHSPQGYNTAR/3	3	5.33	804.711	2045	993.475	2648.81	y9
O00461	1	DPAEQQN[115]VTQVAHSPQGYNTAR/3	3	5.33	804.711	2045	601.289	2131.66	y11^2
O00461	1	DPAEQQN[115]VTQVAHSPQGYNTAR/3	3	5.33	804.711	2045	1130.53	1738.48	y10,y21-35^2,y21-36^2
O00461	1	KPDPAEQQN[115]VTQVAH/2	2	5.33	831.908	951.1	1322.63	5988.52	y12
O00461	1	KPDPAEQQN[115]VTQVAH/2	2	5.33	831.908	951.1	1009.46	1539.81	b9,y9-17
O00461	1	KPDPAEQQN[115]VTQVAH/2	2	5.33	831.908	951.1	654.357	1526.01	y6,a12^2
O00461	1	KPDPAEQQN[115]VTQVAH/2	2	5.33	831.908	951.1	752.357	1116.7	y7-17,y7-18
O00461	1	KPDPAEQQN[115]VTQVAH/2	2	5.33	831.908	951.1	759.347	1109.82	y14-17^2,y14-18^2
O00461	1	KPDPAEQQN[115]VTQVAH/2	2	5.33	831.908	951.1	766.373	1102.44	b7
O00461	1	KPDPAEQQN[115]VTQVAH/2	2	5.33	831.908	951.1	669.32	1011.54	b12^2
O00461	1	KPDPAEQQN[115]VTQVAH/2	2	5.33	831.908	951.1	769.384	891.71	y7
O00461	1	KPDPAEQQN[115]VTQVAH/2	2	5.33	831.908	951.1	981.464	880.98	a9,y9-44,y9-45
O00461	1	KPDPAEQQN[115]VTQVAH/2	2	5.33	831.908	951.1	1108.53	875.21	b10,y10-45,y10-46
O00461	1	KPDPAEQQN[115]VTQVAH/3	3	5.33	554.941	1189.5	505.233	8458.07	b9^2,y9-17^2,y9-18^2
O00461	1	KPDPAEQQN[115]VTQVAH/3	3	5.33	554.941	1189.5	769.384	5059.64	y7
O00461	1	KPDPAEQQN[115]VTQVAH/3	3	5.33	554.941	1189.5	654.357	4041.24	y6,a12^2
O00461	1	KPDPAEQQN[115]VTQVAH/3	3	5.33	554.941	1189.5	447.719	3816	b8^2
O00461	1	KPDPAEQQN[115]VTQVAH/3	3	5.33	554.941	1189.5	638.314	3255.31	b6,y6-17,y12-45^2,y12-46^2
O00461	1	KPDPAEQQN[115]VTQVAH/3	3	5.33	554.941	1189.5	981.464	3183.61	a9,y9-44,y9-45
O00461	1	KPDPAEQQN[115]VTQVAH/3	3	5.33	554.941	1189.5	509.272	2650.11	b5,b14+18^3,y5-45,y5-46
O00461	1	KPDPAEQQN[115]VTQVAH/3	3	5.33	554.941	1189.5	766.373	2432.16	b7
O00461	1	KPDPAEQQN[115]VTQVAH/3	3	5.33	554.941	1189.5	669.32	2397.64	b12^2
O00461	1	KPDPAEQQN[115]VTQVAH/3	3	5.33	554.941	1189.5	454.241	2014.01	y4
O00461	1	KPDPAEQQN[115]VTQVAHSPQGYNTAR/3	3	6.75	879.76	1999.8	1149.05	10000	y21^2
O00461	1	KPDPAEQQN[115]VTQVAHSPQGYNTAR/3	3	6.75	879.76	1999.8	906.443	3534.3	y8,b17-17^2,b17-18^2
O00461	1	KPDPAEQQN[115]VTQVAHSPQGYNTAR/3	3	6.75	879.76	1999.8	993.475	2655.24	y9,a19^2
O00461	1	KPDPAEQQN[115]VTQVAHSPQGYNTAR/3	3	6.75	879.76	1999.8	866.418	2348.72	b16^2,a8
O00461	1	KPDPAEQQN[115]VTQVAHSPQGYNTAR/3	3	6.75	879.76	1999.8	1206.56	2120.83	y22^2
O00461	1	KPDPAEQQN[115]VTQVAHSPQGYNTAR/3	3	6.75	879.76	1999.8	1130.53	1792.81	y10,y21-35^2,y21-36^2
O00461	1	KPDPAEQQN[115]VTQVAHSPQGYNTAR/3	3	6.75	879.76	1999.8	837.062	1646.82	y23^3
O00461	1	KPDPAEQQN[115]VTQVAHSPQGYNTAR/3	3	6.75	879.76	1999.8	822.902	1394.67	b15^2,y23-44^3,y23-45^3
O00461	1	KPDPAEQQN[115]VTQVAHSPQGYNTAR/3	3	6.75	879.76	1999.8	1201.57	1160.74	y11
O00461	1	KPDPAEQQN[115]VTQVAHSPQGYNTAR/3	3	6.75	879.76	1999.8	814.911	1123.79	y15^2,b15-17^2,b23-18^3
O00461	1	KPDPAEQQN[115]VTQVAHSPQGYNTAR/4	4	6.75	660.072	1934.7	765.376	10000	y14^2,y7-44
O00461	1	KPDPAEQQN[115]VTQVAHSPQGYNTAR/4	4	6.75	660.072	1934.7	601.289	4271.39	y11^2,a17^3
O00461	1	KPDPAEQQN[115]VTQVAHSPQGYNTAR/4	4	6.75	660.072	1934.7	766.373	4180.61	b7,y21^3
O00461	1	KPDPAEQQN[115]VTQVAHSPQGYNTAR/4	4	6.75	660.072	1934.7	872.424	3505.85	y16^2
O00461	1	KPDPAEQQN[115]VTQVAHSPQGYNTAR/4	4	6.75	660.072	1934.7	714.853	3376.02	y13^2,b20-34^3,b20-35^3,b20-36^3
O00461	1	KPDPAEQQN[115]VTQVAHSPQGYNTAR/4	4	6.75	660.072	1934.7	814.911	2939.97	y15^2,b15-17^2,b23-18^3
O00461	1	KPDPAEQQN[115]VTQVAHSPQGYNTAR/4	4	6.75	660.072	1934.7	718.854	2560.94	b13^2,y20-44^3,y20-45^3,y20-46^3
O00461	1	KPDPAEQQN[115]VTQVAHSPQGYNTAR/4	4	6.75	660.072	1934.7	624.31	2509.23	y5,y17^3,y23-17^4,y23-18^4
O00461	1	KPDPAEQQN[115]VTQVAHSPQGYNTAR/4	4	6.75	660.072	1934.7	1007.48	2244.41	b19^2
O00461	1	KPDPAEQQN[115]VTQVAHSPQGYNTAR/4	4	6.75	660.072	1934.7	681.332	1744.29	y6
O00461	1	PAEQQN[115]VTQVAHSPQGYNTAR/3	3	7.17	766.368	1638.4	906.443	10000	y8
O00461	1	PAEQQN[115]VTQVAHSPQGYNTAR/3	3	7.17	766.368	1638.4	1065	8065.27	y19^2
O00461	1	PAEQQN[115]VTQVAHSPQGYNTAR/3	3	7.17	766.368	1638.4	993.475	6066.06	y9
O00461	1	PAEQQN[115]VTQVAHSPQGYNTAR/3	3	7.17	766.368	1638.4	872.424	4569.33	y16^2
O00461	1	PAEQQN[115]VTQVAHSPQGYNTAR/3	3	7.17	766.368	1638.4	696.331	3719.15	b13^2,y13-36^2,b20-35^3,b20-36^3,y19-44^3,y19-45^3
O00461	1	PAEQQN[115]VTQVAHSPQGYNTAR/3	3	7.17	766.368	1638.4	1100.52	3500.68	y20^2
O00461	1	PAEQQN[115]VTQVAHSPQGYNTAR/3	3	7.17	766.368	1638.4	936.453	3320.56	y17^2
O00461	1	PAEQQN[115]VTQVAHSPQGYNTAR/3	3	7.17	766.368	1638.4	1130.53	3095.27	y10
O00461	1	PAEQQN[115]VTQVAHSPQGYNTAR/3	3	7.17	766.368	1638.4	1000.48	2861.27	y18^2
O00461	1	PAEQQN[115]VTQVAHSPQGYNTAR/3	3	7.17	766.368	1638.4	814.911	2437.81	y15^2,b16-44^2,b16-45^2,b16-46^2
O00461	1	PDPAEQQN[115]VTQVAHSPQGYNTAR/3	3	5.33	837.062	1759.1	1149.05	2527.64	y21^2,b22-36^2
O00461	1	PDPAEQQN[115]VTQVAHSPQGYNTAR/3	3	5.33	837.062	1759.1	906.443	864.48	y8,b17-17^2,b17-18^2
O00461	1	PDPAEQQN[115]VTQVAHSPQGYNTAR/3	3	5.33	837.062	1759.1	1000.48	657.43	y18^2
O00461	1	PDPAEQQN[115]VTQVAHSPQGYNTAR/3	3	5.33	837.062	1759.1	993.475	653.29	y9
O00461	1	PDPAEQQN[115]VTQVAHSPQGYNTAR/3	3	5.33	837.062	1759.1	814.911	590.07	y15^2
O00461	1	PDPAEQQN[115]VTQVAHSPQGYNTAR/3	3	5.33	837.062	1759.1	1065	529.16	y19^2,b10-17,b20-35^2
O00461	1	PDPAEQQN[115]VTQVAHSPQGYNTAR/3	3	5.33	837.062	1759.1	936.453	514.29	y17^2,b9-44
O00461	1	PDPAEQQN[115]VTQVAHSPQGYNTAR/3	3	5.33	837.062	1759.1	804.711	482.52	y22^3
O00461	1	PDPAEQQN[115]VTQVAHSPQGYNTAR/3	3	5.33	837.062	1759.1	872.424	421.67	y16^2
O00461	1	PDPAEQQN[115]VTQVAHSPQGYNTAR/3	3	5.33	837.062	1759.1	1100.52	382.82	y20^2
O00468	1	C[160]VEESGSAHC[160]VC[160]PM[147]LTC[160]PEAN[115]ATK/3	3	4.75	909.039	2180.1	675.307	10000	y12^2,a12^2
O00468	1	C[160]VEESGSAHC[160]VC[160]PM[147]LTC[160]PEAN[115]ATK/3	3	4.75	909.039	2180.1	891.388	4400.58	y8
O00468	1	C[160]VEESGSAHC[160]VC[160]PM[147]LTC[160]PEAN[115]ATK/3	3	4.75	909.039	2180.1	755.323	3750.88	y13^2,a20^3
O00468	1	C[160]VEESGSAHC[160]VC[160]PM[147]LTC[160]PEAN[115]ATK/3	3	4.75	909.039	2180.1	731.357	3341.23	y7,b7-17,b7-18,y20-17^3,y20-18^3,y13-46^2,a19^3
O00468	1	C[160]VEESGSAHC[160]VC[160]PM[147]LTC[160]PEAN[115]ATK/3	3	4.75	909.039	2180.1	992.435	2395.27	y9
O00468	1	C[160]VEESGSAHC[160]VC[160]PM[147]LTC[160]PEAN[115]ATK/3	3	4.75	909.039	2180.1	1060.95	2288.28	y19^2,y10-44,y10-45
O00468	1	C[160]VEESGSAHC[160]VC[160]PM[147]LTC[160]PEAN[115]ATK/3	3	4.75	909.039	2180.1	1105.52	2230.76	y10,b20-82^2
O00468	1	C[160]VEESGSAHC[160]VC[160]PM[147]LTC[160]PEAN[115]ATK/3	3	4.75	909.039	2180.1	1349.61	2184.43	y12
O00468	1	C[160]VEESGSAHC[160]VC[160]PM[147]LTC[160]PEAN[115]ATK/3	3	4.75	909.039	2180.1	988.92	1733.95	y17^2,b17-17^2,b17-18^2
O00468	1	C[160]VEESGSAHC[160]VC[160]PM[147]LTC[160]PEAN[115]ATK/3	3	4.75	909.039	2180.1	1168.98	1392.72	y21^2
O00468	1	GC[160]C[160]QDN[115]ITAAR/2	2	5.83	633.764	1089.6	525.238	9547.01	y9^2,b10-44^2
O00468	1	GC[160]C[160]QDN[115]ITAAR/2	2	5.83	633.764	1089.6	418.241	8293.38	y4
O00468	1	GC[160]C[160]QDN[115]ITAAR/2	2	5.83	633.764	1089.6	849.287	5019.94	b7
O00468	1	GC[160]C[160]QDN[115]ITAAR/2	2	5.83	633.764	1089.6	1049.47	4916.63	y9
O00468	1	GC[160]C[160]QDN[115]ITAAR/2	2	5.83	633.764	1089.6	761.379	4388.71	y7
O00468	1	GC[160]C[160]QDN[115]ITAAR/2	2	5.83	633.764	1089.6	889.437	3743.36	y8
O00468	1	GC[160]C[160]QDN[115]ITAAR/2	2	5.83	633.764	1089.6	621.176	2732.87	b5
O00468	1	GC[160]C[160]QDN[115]ITAAR/2	2	5.83	633.764	1089.6	531.325	2237.15	y5
O00468	1	GC[160]C[160]QDN[115]ITAAR/2	2	5.83	633.764	1089.6	950.334	1890.55	b8
O00468	1	GC[160]C[160]QDN[115]ITAAR/2	2	5.83	633.764	1089.6	646.352	1612.88	y6
O00468	1	NELM[147]LN[115]SSLM[147]R/2	2	6.01	670.813	2168.8	837.413	5863.78	y7
O00468	1	NELM[147]LN[115]SSLM[147]R/2	2	6.01	670.813	2168.8	984.449	5373.19	y8,b9-34,b9-35,b9-36
O00468	1	NELM[147]LN[115]SSLM[147]R/2	2	6.01	670.813	2168.8	724.329	5316.18	y6
O00468	1	NELM[147]LN[115]SSLM[147]R/2	2	6.01	670.813	2168.8	609.303	3964.6	y5
O00468	1	NELM[147]LN[115]SSLM[147]R/2	2	6.01	670.813	2168.8	549.27	3753.9	y9^2
O00468	1	NELM[147]LN[115]SSLM[147]R/2	2	6.01	670.813	2168.8	1097.53	3529.01	y9
O00468	1	NELM[147]LN[115]SSLM[147]R/2	2	6.01	670.813	2168.8	617.296	1984.05	b5
O00468	1	NELM[147]LN[115]SSLM[147]R/2	2	6.01	670.813	2168.8	522.27	1878.99	y4
O00468	1	NELM[147]LN[115]SSLM[147]R/2	2	6.01	670.813	2168.8	732.323	1380.08	b6
O00468	1	NELM[147]LN[115]SSLM[147]R/2	2	6.01	670.813	2168.8	819.355	1041.21	b7,y7-18
O00468	1	NELM[147]LN[115]SSLMR/2	2	6.01	662.815	2190.2	1081.54	6084.85	y9
O00468	1	NELM[147]LN[115]SSLMR/2	2	6.01	662.815	2190.2	605.794	4405.4	y10^2
O00468	1	NELM[147]LN[115]SSLMR/2	2	6.01	662.815	2190.2	968.454	4109.34	y8
O00468	1	NELM[147]LN[115]SSLMR/2	2	6.01	662.815	2190.2	541.273	3641.58	y9^2
O00468	1	NELM[147]LN[115]SSLMR/2	2	6.01	662.815	2190.2	821.419	3255.04	y7
O00468	1	NELM[147]LN[115]SSLMR/2	2	6.01	662.815	2190.2	708.335	3085.15	y6
O00468	1	NELM[147]LN[115]SSLMR/2	2	6.01	662.815	2190.2	504.212	2538.12	b4
O00468	1	NELM[147]LN[115]SSLMR/2	2	6.01	662.815	2190.2	617.296	2450.7	b5
O00468	1	NELM[147]LN[115]SSLMR/2	2	6.01	662.815	2190.2	593.308	2150.96	y5
O00468	1	NELM[147]LN[115]SSLMR/2	2	6.01	662.815	2190.2	484.731	1521.66	y8^2
O00469	1	EAIN[115]ITLDHK/2	2	5.33	577.806	2112.5	613.33	4824.83	y5
O00469	1	EAIN[115]ITLDHK/2	2	5.33	577.806	2112.5	726.414	3355.89	y6
O00469	1	EAIN[115]ITLDHK/2	2	5.33	577.806	2112.5	841.441	2957.33	y7
O00469	1	EAIN[115]ITLDHK/2	2	5.33	577.806	2112.5	477.766	2149.11	y8^2,y4-35
O00469	1	EAIN[115]ITLDHK/2	2	5.33	577.806	2112.5	512.283	1396.06	y4
O00469	1	EAIN[115]ITLDHK/2	2	5.33	577.806	2112.5	495.256	1168.22	y4-17,y4-18,b9-17^2,b9-18^2,y9-35^2,y9-36^2
O00469	1	EAIN[115]ITLDHK/2	2	5.33	577.806	2112.5	421.224	996.26	y7^2
O00469	1	EAIN[115]ITLDHK/2	2	5.33	577.806	2112.5	542.282	811	b5
O00469	1	EAIN[115]ITLDHK/2	2	5.33	577.806	2112.5	429.198	801.95	b4
O00469	1	EAIN[115]ITLDHK/2	2	5.33	577.806	2112.5	954.525	694.89	y8
O00469	1	IVGPEEN[115]LSQAEAR/2	2	4.26	757.378	2094	651.302	10000	y12^2
O00469	1	IVGPEEN[115]LSQAEAR/2	2	4.26	757.378	2094	622.791	3893.36	y11^2
O00469	1	IVGPEEN[115]LSQAEAR/2	2	4.26	757.378	2094	661.326	2355.95	y6,b13-17^2,b13-18^2
O00469	1	IVGPEEN[115]LSQAEAR/2	2	4.26	757.378	2094	1301.6	2026.49	y12
O00469	1	IVGPEEN[115]LSQAEAR/2	2	4.26	757.378	2094	700.836	2016.64	y13^2
O00469	1	IVGPEEN[115]LSQAEAR/2	2	4.26	757.378	2094	889.437	1815.16	y8
O00469	1	IVGPEEN[115]LSQAEAR/2	2	4.26	757.378	2094	1018.48	1216.33	y9
O00469	1	IVGPEEN[115]LSQAEAR/2	2	4.26	757.378	2094	774.41	1027.95	y7
O00469	1	IVGPEEN[115]LSQAEAR/2	2	4.26	757.378	2094	446.236	898.26	y4
O00469	1	IVGPEEN[115]LSQAEAR/2	2	4.26	757.378	2094	574.294	874.19	y5,y10^2
O00469	1	LLSTANYN[115]TSH/2	2	6.73	611.291	1326.5	995.407	6723.81	y9
O00469	1	LLSTANYN[115]TSH/2	2	6.73	611.291	1326.5	736.29	2263.36	y6,a7
O00469	1	LLSTANYN[115]TSH/2	2	6.73	611.291	1326.5	807.327	1225.9	y7
O00469	1	LLSTANYN[115]TSH/2	2	6.73	611.291	1326.5	498.207	991.97	y9^2
O00469	1	LLSTANYN[115]TSH/2	2	6.73	611.291	1326.5	490.24	978.85	b9^2,y9-17^2
O00469	1	LLSTANYN[115]TSH/2	2	6.73	611.291	1326.5	459.183	731.19	y4,a5
O00469	1	LLSTANYN[115]TSH/2	2	6.73	611.291	1326.5	960.369	538.67	y9-35,y9-36
O00469	1	LLSTANYN[115]TSH/2	2	6.73	611.291	1326.5	577.225	421.57	y5-45,y5-46
O00469	1	LLSTANYN[115]TSH/2	2	6.73	611.291	1326.5	578.257	305.14	y5-44
O00469	1	LLSTANYN[115]TSH/2	2	6.73	611.291	1326.5	572.34	260.72	a6
O00469	1	LLSTANYN[115]TSHYN/2	2	6.73	749.844	1477.7	854.332	5456.41	y7-45,y7-46
O00469	1	LLSTANYN[115]TSHYN/2	2	6.73	749.844	1477.7	736.29	5087.76	y6
O00469	1	LLSTANYN[115]TSHYN/2	2	6.73	749.844	1477.7	1013.4	2871.69	y8
O00469	1	LLSTANYN[115]TSHYN/2	2	6.73	749.844	1477.7	636.76	2733.78	y11^2
O00469	1	LLSTANYN[115]TSHYN/2	2	6.73	749.844	1477.7	1272.51	2729.88	y11
O00469	1	LLSTANYN[115]TSHYN/2	2	6.73	749.844	1477.7	735.404	1713.94	a7
O00469	1	LLSTANYN[115]TSHYN/2	2	6.73	749.844	1477.7	520.215	1616.49	y4,a10^2,y9-44^2,y9-45^2,y9-46^2
O00469	1	LLSTANYN[115]TSHYN/2	2	6.73	749.844	1477.7	1084.43	1229.63	y9
O00469	1	LLSTANYN[115]TSHYN/2	2	6.73	749.844	1477.7	1203.56	1227.71	b11
O00469	1	LLSTANYN[115]TSHYN/2	2	6.73	749.844	1477.7	899.353	1178.99	y7
O00469	1	LTHLHEGLPVKN[115]GTR/3	3	8.76	558.309	1609.7	549.309	10000	b10^2
O00469	1	LTHLHEGLPVKN[115]GTR/3	3	8.76	558.309	1609.7	486.932	9831.64	y13^3
O00469	1	LTHLHEGLPVKN[115]GTR/3	3	8.76	558.309	1609.7	661.365	6486.73	y12^2,b12-17^2,b12-18^2
O00469	1	LTHLHEGLPVKN[115]GTR/3	3	8.76	558.309	1609.7	604.823	6359.63	y11^2,b11-17^2,b11-18^2
O00469	1	LTHLHEGLPVKN[115]GTR/3	3	8.76	558.309	1609.7	901.489	2848.39	b8
O00469	1	LTHLHEGLPVKN[115]GTR/3	3	8.76	558.309	1609.7	471.772	2674.47	y9^2,y13-44^3,y13-45^3,y13-46^3
O00469	1	LTHLHEGLPVKN[115]GTR/3	3	8.76	558.309	1609.7	772.431	2095.45	y7,y14-17^2
O00469	1	LTHLHEGLPVKN[115]GTR/3	3	8.76	558.309	1609.7	499.774	1963.37	b9^2,b14^3
O00469	1	LTHLHEGLPVKN[115]GTR/3	3	8.76	558.309	1609.7	731.384	1075.23	b6,b14-36^2
O00469	1	LTHLHEGLPVKN[115]GTR/3	3	8.76	558.309	1609.7	670.87	1011.99	b12^2
O00469	1	LTHLHEGLPVKN[115]GTR/4	4	8.76	418.984	1101	486.932	10000	y13^3
O00469	1	LTHLHEGLPVKN[115]GTR/4	4	8.76	418.984	1101	520.615	7376.22	y14^3
O00469	1	LTHLHEGLPVKN[115]GTR/4	4	8.76	418.984	1101	448.215	2652.94	y4,b12^3,b4-17,b4-18,y9-46^2
O00469	1	LTHLHEGLPVKN[115]GTR/4	4	8.76	418.984	1101	536.293	2457.22	y10^2,a10^2
O00469	1	LTHLHEGLPVKN[115]GTR/4	4	8.76	418.984	1101	471.772	1671.65	y9^2,y13-44^3,y13-45^3,y13-46^3
O00469	1	LTHLHEGLPVKN[115]GTR/4	4	8.76	418.984	1101	403.551	1264.56	y11^3,b11-17^3,b11-18^3,y4-44,y4-45
O00469	1	LTHLHEGLPVKN[115]GTR/4	4	8.76	418.984	1101	604.823	1136.18	y11^2,b11-17^2,b11-18^2
O00469	1	LTHLHEGLPVKN[115]GTR/4	4	8.76	418.984	1101	441.246	1070.42	y12^3,b8-18^2,b12-17^3,b12-18^3
O00469	1	LTHLHEGLPVKN[115]GTR/4	4	8.76	418.984	1101	661.365	957.49	y12^2,b12-17^2,b12-18^2
O00469	1	LTHLHEGLPVKN[115]GTR/4	4	8.76	418.984	1101	443.261	539.09	y8^2,b8-17^2
O00469	1	YFN[115]YTVK/2	2	8.5	468.229	2137.4	625.319	10000	y5
O00469	1	YFN[115]YTVK/2	2	8.5	468.229	2137.4	772.388	1972.82	y6,b6-17
O00469	1	YFN[115]YTVK/2	2	8.5	468.229	2137.4	510.292	573.49	y4
O00469	1	YFN[115]YTVK/2	2	8.5	468.229	2137.4	426.166	403.16	b3
O00469	1	YFN[115]YTVK/2	2	8.5	468.229	2137.4	789.345	110.88	b6
O00469	1	YFN[115]YTVK/2	2	8.5	468.229	2137.4	608.293	110.62	y5-17,y5-18
O00469	1	YFN[115]YTVK/2	2	8.5	468.229	2137.4	589.229	97.36	b4,y5-36
O00469	1	YFN[115]YTVK/2	2	8.5	468.229	2137.4	561.234	91.94	a4
O00469	1	YFN[115]YTVK/2	2	8.5	468.229	2137.4	755.361	88.12	y6-17,y6-18,b6-34
O00469	1	YFN[115]YTVK/2	2	8.5	468.229	2137.4	690.277	56.28	b5
O00469	1	YN[115]C[160]SIESPR/2	2	6	563.745	710.5	488.246	4447.27	y4
O00469	1	YN[115]C[160]SIESPR/2	2	6	563.745	710.5	424.7	2913.58	y7^2
O00469	1	YN[115]C[160]SIESPR/2	2	6	563.745	710.5	848.393	2825.93	y7
O00469	1	YN[115]C[160]SIESPR/2	2	6	563.745	710.5	688.362	2096.3	y6
O00469	1	YN[115]C[160]SIESPR/2	2	6	563.745	710.5	476.69	1855.22	b8^2
O00469	1	YN[115]C[160]SIESPR/2	2	6	563.745	710.5	485.695	1598.43	b8+18^2
O00469	1	YN[115]C[160]SIESPR/2	2	6	563.745	710.5	439.128	1439.28	b3
O00469	1	YN[115]C[160]SIESPR/2	2	6	563.745	710.5	639.244	1225.31	b5
O00469	1	YN[115]C[160]SIESPR/2	2	6	563.745	710.5	601.33	993.08	y5
O00469	1	YN[115]C[160]SIESPR/2	2	6	563.745	710.5	526.16	835.26	b4
O00481;P78410;O00478	3	HN[115]VTASDSGK/2	2	6.75	508.736	586.3	764.379	10000	y8
O00481;P78410;O00478	3	HN[115]VTASDSGK/2	2	6.75	508.736	586.3	726.305	6571.61	b7
O00481;P78410;O00478	3	HN[115]VTASDSGK/2	2	6.75	508.736	586.3	879.405	6308.37	y9
O00481;P78410;O00478	3	HN[115]VTASDSGK/2	2	6.75	508.736	586.3	665.31	5905.22	y7
O00481;P78410;O00478	3	HN[115]VTASDSGK/2	2	6.75	508.736	586.3	493.225	1472.11	y5
O00481;P78410;O00478	3	HN[115]VTASDSGK/2	2	6.75	508.736	586.3	564.262	1338.06	y6
O00481;P78410;O00478	3	HN[115]VTASDSGK/2	2	6.75	508.736	586.3	870.359	846.65	b9
O00481;P78410;O00478	3	HN[115]VTASDSGK/2	2	6.75	508.736	586.3	524.246	788.83	b5
O00481;P78410;O00478	3	HN[115]VTASDSGK/2	2	6.75	508.736	586.3	813.337	779.31	b8
O00481;P78410;O00478	3	HN[115]VTASDSGK/2	2	6.75	508.736	586.3	453.209	588.19	b4
O00481;P78410;O00478	3	IHN[115]VTASDSGK/2	2	6.75	565.278	192.8	879.405	10000	y9
O00481;P78410;O00478	3	IHN[115]VTASDSGK/2	2	6.75	565.278	192.8	508.736	4736.57	y10^2
O00481;P78410;O00478	3	IHN[115]VTASDSGK/2	2	6.75	565.278	192.8	665.31	1896.48	y7
O00481;P78410;O00478	3	IHN[115]VTASDSGK/2	2	6.75	565.278	192.8	764.379	1653.77	y8
O00481;P78410;O00478	3	IHN[115]VTASDSGK/2	2	6.75	565.278	192.8	839.389	800.16	b8
O00481;P78410;O00478	3	IHN[115]VTASDSGK/2	2	6.75	565.278	192.8	465.246	723.75	b4
O00481;P78410;O00478	3	IHN[115]VTASDSGK/2	2	6.75	565.278	192.8	493.225	407.63	y5
O00481;P78410;O00478	3	IHN[115]VTASDSGK/2	2	6.75	565.278	192.8	637.33	346.61	b6
O00481;P78410;O00478	3	IHN[115]VTASDSGK/2	2	6.75	565.278	192.8	437.251	239.43	a4
O00481;P78410;O00478	3	IHN[115]VTASDSGK/2	2	6.75	565.278	192.8	538.298	208.14	a5
O00481;P78410;O00478	3	IHN[115]VTASDSGK/3	3	6.75	377.188	1322.7	493.225	6165.44	y5
O00481;P78410;O00478	3	IHN[115]VTASDSGK/3	3	6.75	377.188	1322.7	564.262	3563.37	y6
O00481;P78410;O00478	3	IHN[115]VTASDSGK/3	3	6.75	377.188	1322.7	547.236	3400.62	y6-17,y6-18
O00481;P78410;O00478	3	IHN[115]VTASDSGK/3	3	6.75	377.188	1322.7	465.246	2349.41	b4
O00481;P78410;O00478	3	IHN[115]VTASDSGK/3	3	6.75	377.188	1322.7	406.193	1954.76	y4,a8^2
O00481;P78410;O00478	3	IHN[115]VTASDSGK/3	3	6.75	377.188	1322.7	637.33	1611.43	b6
O00481;P78410;O00478	3	IHN[115]VTASDSGK/3	3	6.75	377.188	1322.7	648.284	866.84	y7-17,y7-18
O00481;P78410;O00478	3	IHN[115]VTASDSGK/3	3	6.75	377.188	1322.7	420.198	527.95	b8^2,b4-45
O00481;P78410;O00478	3	IHN[115]VTASDSGK/3	3	6.75	377.188	1322.7	463.714	298.95	b9^2
O00481;P78410;O00478	3	IHN[115]VTASDSGK/3	3	6.75	377.188	1322.7	437.251	207.7	a4
O00533	1	DGEAFEIN[115]GTEDGR/2	2	3.83	755.818	2310.8	634.279	10000	y6
O00533	1	DGEAFEIN[115]GTEDGR/2	2	3.83	755.818	2310.8	991.433	7599.93	y9,b10-44
O00533	1	DGEAFEIN[115]GTEDGR/2	2	3.83	755.818	2310.8	862.39	7176.05	y8
O00533	1	DGEAFEIN[115]GTEDGR/2	2	3.83	755.818	2310.8	1138.5	4770.94	y10
O00533	1	DGEAFEIN[115]GTEDGR/2	2	3.83	755.818	2310.8	649.246	3438.55	b6
O00533	1	DGEAFEIN[115]GTEDGR/2	2	3.83	755.818	2310.8	877.357	3285.05	b8
O00533	1	DGEAFEIN[115]GTEDGR/2	2	3.83	755.818	2310.8	1209.54	1947.1	y11
O00533	1	DGEAFEIN[115]GTEDGR/2	2	3.83	755.818	2310.8	476.21	1343.17	y4,b5-44
O00533	1	DGEAFEIN[115]GTEDGR/2	2	3.83	755.818	2310.8	577.258	1098.54	y5
O00533	1	DGEAFEIN[115]GTEDGR/2	2	3.83	755.818	2310.8	1035.43	1048.33	b10
O00533	1	LSNLN[115]ATTK/2	2	8.76	481.761	2508.5	762.399	10000	y7
O00533	1	LSNLN[115]ATTK/2	2	8.76	481.761	2508.5	535.272	4793.51	y5
O00533	1	LSNLN[115]ATTK/2	2	8.76	481.761	2508.5	648.356	2769.46	y6
O00533	1	LSNLN[115]ATTK/2	2	8.76	481.761	2508.5	849.431	2271.05	y8
O00533	1	LSNLN[115]ATTK/2	2	8.76	481.761	2508.5	428.25	1335.26	b4
O00533	1	LSNLN[115]ATTK/2	2	8.76	481.761	2508.5	400.195	1001.5	b8-17^2,b8-18^2,a4
O00533	1	LSNLN[115]ATTK/2	2	8.76	481.761	2508.5	420.245	971.41	y4
O00533	1	LSNLN[115]ATTK/2	2	8.76	481.761	2508.5	543.277	791.54	b5
O00533	1	LSNLN[115]ATTK/2	2	8.76	481.761	2508.5	425.219	497.32	y8^2
O00533	1	LSNLN[115]ATTK/2	2	8.76	481.761	2508.5	614.314	216.09	b6,y6-35
O00533	1	LTWEAGADHNSN[115]ISEYIVEFEGNKEEPGR/3	3	4.3	1098.17	3992	1225.07	10000	y21^2
O00533	1	LTWEAGADHNSN[115]ISEYIVEFEGNKEEPGR/3	3	4.3	1098.17	3992	1346.61	7150.36	y24^2,y12-44,y12-45
O00533	1	LTWEAGADHNSN[115]ISEYIVEFEGNKEEPGR/3	3	4.3	1098.17	3992	886.438	6949.47	y8,b16-17^2,b16-18^2,b24-46^3,y24-35^3,y24-36^3
O00533	1	LTWEAGADHNSN[115]ISEYIVEFEGNKEEPGR/3	3	4.3	1098.17	3992	921.755	4349.05	y25^3
O00533	1	LTWEAGADHNSN[115]ISEYIVEFEGNKEEPGR/3	3	4.3	1098.17	3992	1162.55	4144.15	y10
O00533	1	LTWEAGADHNSN[115]ISEYIVEFEGNKEEPGR/3	3	4.3	1098.17	3992	998.486	3995.54	y17^2,y9-17
O00533	1	LTWEAGADHNSN[115]ISEYIVEFEGNKEEPGR/3	3	4.3	1098.17	3992	1282.58	3607.76	y22^2
O00533	1	LTWEAGADHNSN[115]ISEYIVEFEGNKEEPGR/3	3	4.3	1098.17	3992	1291.59	3339.36	y11
O00533	1	LTWEAGADHNSN[115]ISEYIVEFEGNKEEPGR/3	3	4.3	1098.17	3992	1390.66	2596.87	y12
O00533	1	LTWEAGADHNSN[115]ISEYIVEFEGNKEEPGR/3	3	4.3	1098.17	3992	1382.13	2158.64	y25^2,a13
O00533	1	LTWEAGADHNSN[115]ISEYIVEFEGNKEEPGR/4	4	4.3	823.881	3723.7	1026.8	10000	y27^3
O00533	1	LTWEAGADHNSN[115]ISEYIVEFEGNKEEPGR/4	4	4.3	823.881	3723.7	898.428	2785.1	y15^2,y24^3
O00533	1	LTWEAGADHNSN[115]ISEYIVEFEGNKEEPGR/4	4	4.3	823.881	3723.7	921.755	2742.24	y25^3
O00533	1	LTWEAGADHNSN[115]ISEYIVEFEGNKEEPGR/4	4	4.3	823.881	3723.7	771.361	1923.06	y20^3,b28-35^4,b28-36^4
O00533	1	LTWEAGADHNSN[115]ISEYIVEFEGNKEEPGR/4	4	4.3	823.881	3723.7	941.944	1622.96	y16^2,b17-18^2
O00533	1	LTWEAGADHNSN[115]ISEYIVEFEGNKEEPGR/4	4	4.3	823.881	3723.7	964.769	1432.96	y26^3,b9-17
O00533	1	LTWEAGADHNSN[115]ISEYIVEFEGNKEEPGR/4	4	4.3	823.881	3723.7	695.833	657.74	y12^2,b13-18^2,b19-44^3,b19-45^3,b19-46^3
O00533	1	LTWEAGADHNSN[115]ISEYIVEFEGNKEEPGR/4	4	4.3	823.881	3723.7	752.375	617.57	y13^2
O00533	1	LTWEAGADHNSN[115]ISEYIVEFEGNKEEPGR/4	4	4.3	823.881	3723.7	998.486	526.11	y17^2,y9-17
O00533	1	LTWEAGADHNSN[115]ISEYIVEFEGNKEEPGR/4	4	4.3	823.881	3723.7	646.299	348.31	y11^2
O00533	1	PQGAPVEWEEETVTN[115]HTLR/3	3	4.48	732.019	2867	984.968	10000	y17^2
O00533	1	PQGAPVEWEEETVTN[115]HTLR/3	3	4.48	732.019	2867	920.939	7996.22	y15^2
O00533	1	PQGAPVEWEEETVTN[115]HTLR/3	3	4.48	732.019	2867	911.934	1380.97	y15-18^2
O00533	1	PQGAPVEWEEETVTN[115]HTLR/3	3	4.48	732.019	2867	912.426	1345.55	y15-17^2
O00533	1	PQGAPVEWEEETVTN[115]HTLR/3	3	4.48	732.019	2867	942.5	1210.53	y8
O00533	1	PQGAPVEWEEETVTN[115]HTLR/3	3	4.48	732.019	2867	641.337	1160.02	y5,y11-46^2,y17-44^3,y17-45^3,y17-46^3
O00533	1	PQGAPVEWEEETVTN[115]HTLR/3	3	4.48	732.019	2867	841.453	1153.54	y7
O00533	1	PQGAPVEWEEETVTN[115]HTLR/3	3	4.48	732.019	2867	526.31	1126.45	y4,y9-18^2
O00533	1	PQGAPVEWEEETVTN[115]HTLR/3	3	4.48	732.019	2867	712.838	970.22	a13^2
O00533	1	PQGAPVEWEEETVTN[115]HTLR/3	3	4.48	732.019	2867	956.458	915.99	y16^2
O00533	1	PSN[115]NSGTFR/2	2	10.18	490.725	2012	796.358	8062.09	y7
O00533	1	PSN[115]NSGTFR/2	2	10.18	490.725	2012	883.39	7673.83	y8
O00533	1	PSN[115]NSGTFR/2	2	10.18	490.725	2012	480.257	4523.9	y4
O00533	1	PSN[115]NSGTFR/2	2	10.18	490.725	2012	681.332	3452.09	y6
O00533	1	PSN[115]NSGTFR/2	2	10.18	490.725	2012	567.288	3228.18	y5
O00533	1	PSN[115]NSGTFR/2	2	10.18	490.725	2012	403.669	2578.78	b8^2
O00533	1	PSN[115]NSGTFR/2	2	10.18	490.725	2012	433.686	1343.91	y8-17^2,y4-46
O00533	1	PSN[115]NSGTFR/2	2	10.18	490.725	2012	664.305	1196.74	y6-17,y6-18
O00533	1	PSN[115]NSGTFR/2	2	10.18	490.725	2012	414.162	849.68	b4
O00533	1	PSN[115]NSGTFR/2	2	10.18	490.725	2012	423.235	618.1	y3,y8-36^2
O00533	1	PSWHLSNLN[115]ATTK/3	3	9.18	490.584	2553.9	686.846	7356.13	y12^2
O00533	1	PSWHLSNLN[115]ATTK/3	3	9.18	490.584	2553.9	535.272	7312.51	y5
O00533	1	PSWHLSNLN[115]ATTK/3	3	9.18	490.584	2553.9	849.431	5503.09	y8
O00533	1	PSWHLSNLN[115]ATTK/3	3	9.18	490.584	2553.9	762.399	4813.49	y7
O00533	1	PSWHLSNLN[115]ATTK/3	3	9.18	490.584	2553.9	481.761	4404.73	y9^2
O00533	1	PSWHLSNLN[115]ATTK/3	3	9.18	490.584	2553.9	420.245	3976.95	y4
O00533	1	PSWHLSNLN[115]ATTK/3	3	9.18	490.584	2553.9	525.754	3916.27	b9^2
O00533	1	PSWHLSNLN[115]ATTK/3	3	9.18	490.584	2553.9	643.33	3292.89	y11^2,b12-36^2
O00533	1	PSWHLSNLN[115]ATTK/3	3	9.18	490.584	2553.9	648.356	3073.46	y6,a12^2
O00533	1	PSWHLSNLN[115]ATTK/3	3	9.18	490.584	2553.9	550.291	2480.13	y10^2
O00533	1	SGEDYPDTAPVIHGVDVIN[115]STLVK/3	3	4.22	843.09	4002.1	988.539	10000	y19^2
O00533	1	SGEDYPDTAPVIHGVDVIN[115]STLVK/3	3	4.22	843.09	4002.1	989.551	2376.03	y9,b10-44
O00533	1	SGEDYPDTAPVIHGVDVIN[115]STLVK/3	3	4.22	843.09	4002.1	1070.07	905.79	y20^2,y10-18,a21^2
O00533	1	SGEDYPDTAPVIHGVDVIN[115]STLVK/3	3	4.22	843.09	4002.1	796.456	798.02	y15^2
O00533	1	SGEDYPDTAPVIHGVDVIN[115]STLVK/3	3	4.22	843.09	4002.1	1127.58	650.95	y21^2,y11-18,a22^2
O00533	1	SGEDYPDTAPVIHGVDVIN[115]STLVK/3	3	4.22	843.09	4002.1	882.499	433.35	y17^2
O00533	1	SGEDYPDTAPVIHGVDVIN[115]STLVK/3	3	4.22	843.09	4002.1	940.012	232.55	y18^2
O00533	1	SGEDYPDTAPVIHGVDVIN[115]STLVK/3	3	4.22	843.09	4002.1	659.361	160.1	y19^3
O00533	1	SGEDYPDTAPVIHGVDVIN[115]STLVK/3	3	4.22	843.09	4002.1	1145.64	152.84	y11
O00533	1	SGEDYPDTAPVIHGVDVIN[115]STLVK/3	3	4.22	843.09	4002.1	874.524	139.89	y8,y17-17^2
O00533	1	VTWKPQGAPVEWEEETVTN[115]HTLR/3	3	4.9	903.449	3202.3	1097.52	10000	y19^2
O00533	1	VTWKPQGAPVEWEEETVTN[115]HTLR/3	3	4.9	903.449	3202.3	742.384	2442.13	y6
O00533	1	VTWKPQGAPVEWEEETVTN[115]HTLR/3	3	4.9	903.449	3202.3	526.31	1457.67	y4,y9-18^2
O00533	1	VTWKPQGAPVEWEEETVTN[115]HTLR/3	3	4.9	903.449	3202.3	841.453	996.22	y7,a8
O00533	1	VTWKPQGAPVEWEEETVTN[115]HTLR/3	3	4.9	903.449	3202.3	942.5	922.09	y8
O00533	1	VTWKPQGAPVEWEEETVTN[115]HTLR/3	3	4.9	903.449	3202.3	774.034	855.27	b20^3,y20^3
O00533	1	VTWKPQGAPVEWEEETVTN[115]HTLR/3	3	4.9	903.449	3202.3	641.337	812.32	y5,y11-46^2,b17-44^3,b17-45^3,b17-46^3,y17-44^3,y17-45^3,y17-46^3
O00533	1	VTWKPQGAPVEWEEETVTN[115]HTLR/3	3	4.9	903.449	3202.3	1071.54	720.12	y9
O00533	1	VTWKPQGAPVEWEEETVTN[115]HTLR/3	3	4.9	903.449	3202.3	1200.59	695.22	y10
O00533	1	VTWKPQGAPVEWEEETVTN[115]HTLR/3	3	4.9	903.449	3202.3	983.981	672.54	b17^2,y17^2
O00533	1	VTWKPQGAPVEWEEETVTN[115]HTLR/4	4	4.9	677.838	3442.1	836.743	10000	y21^3,a22^3
O00533	1	VTWKPQGAPVEWEEETVTN[115]HTLR/4	4	4.9	677.838	3442.1	920.939	2828.72	y15^2,b9-45,a16^2
O00533	1	VTWKPQGAPVEWEEETVTN[115]HTLR/4	4	4.9	677.838	3442.1	614.295	2491.82	y15^3,a16^3
O00533	1	VTWKPQGAPVEWEEETVTN[115]HTLR/4	4	4.9	677.838	3442.1	870.426	2020.3	y22^3,a15^2
O00533	1	VTWKPQGAPVEWEEETVTN[115]HTLR/4	4	4.9	677.838	3442.1	1097.52	825.08	y19^2
O00533	1	VTWKPQGAPVEWEEETVTN[115]HTLR/4	4	4.9	677.838	3442.1	758.357	396.18	y12^2,b20-45^3,b20-46^3
O00533	1	VTWKPQGAPVEWEEETVTN[115]HTLR/4	4	4.9	677.838	3442.1	774.034	297.35	b20^3,y20^3
O00533	1	VTWKPQGAPVEWEEETVTN[115]HTLR/4	4	4.9	677.838	3442.1	822.879	247.15	y13^2,y7-18,b8-45,y21-44^3
O00533	1	VTWKPQGAPVEWEEETVTN[115]HTLR/4	4	4.9	677.838	3442.1	665.318	231.63	y11^2
O00533	1	VTWKPQGAPVEWEEETVTN[115]HTLR/4	4	4.9	677.838	3442.1	872.413	218.84	y14^2
O00533	1	YHIYEN[115]GTLQIN[115]R/2	2	6.75	811.894	2717.9	1209.57	10000	y10
O00533	1	YHIYEN[115]GTLQIN[115]R/2	2	6.75	811.894	2717.9	1322.66	8500.39	y11
O00533	1	YHIYEN[115]GTLQIN[115]R/2	2	6.75	811.894	2717.9	1046.51	3342.75	y9,b9-45,b9-46
O00533	1	YHIYEN[115]GTLQIN[115]R/2	2	6.75	811.894	2717.9	917.469	2802.66	y8
O00533	1	YHIYEN[115]GTLQIN[115]R/2	2	6.75	811.894	2717.9	730.362	2183.17	y12^2
O00533	1	YHIYEN[115]GTLQIN[115]R/2	2	6.75	811.894	2717.9	531.288	1235.15	y4
O00533	1	YHIYEN[115]GTLQIN[115]R/2	2	6.75	811.894	2717.9	1092.5	1122.07	b9
O00533	1	YHIYEN[115]GTLQIN[115]R/2	2	6.75	811.894	2717.9	644.373	1069.21	y5,b11-44^2,b11-45^2,b11-46^2,y11-35^2,y11-36^2
O00533	1	YHIYEN[115]GTLQIN[115]R/2	2	6.75	811.894	2717.9	1220.56	891.13	b10
O00533	1	YHIYEN[115]GTLQIN[115]R/2	2	6.75	811.894	2717.9	745.42	802.16	y6
O00533	1	YHIYEN[115]GTLQIN[115]R/3	3	6.75	541.598	2993.7	531.288	7739.58	y4
O00533	1	YHIYEN[115]GTLQIN[115]R/3	3	6.75	541.598	2993.7	523.759	5763.5	y9^2,b9-45^2,b9-46^2
O00533	1	YHIYEN[115]GTLQIN[115]R/3	3	6.75	541.598	2993.7	403.23	3111.36	y3,y10^3,b6-17^2
O00533	1	YHIYEN[115]GTLQIN[115]R/3	3	6.75	541.598	2993.7	610.783	2236.2	b10^2
O00533	1	YHIYEN[115]GTLQIN[115]R/3	3	6.75	541.598	2993.7	644.373	1249.56	y5,b11-44^2,b11-45^2,b11-46^2,y11-35^2,y11-36^2
O00533	1	YHIYEN[115]GTLQIN[115]R/3	3	6.75	541.598	2993.7	667.325	1174.8	b11^2
O00533	1	YHIYEN[115]GTLQIN[115]R/3	3	6.75	541.598	2993.7	496.251	1017.5	y4-35
O00533	1	YHIYEN[115]GTLQIN[115]R/3	3	6.75	541.598	2993.7	501.764	815.64	y9-44^2,y9-45^2
O00533	1	YHIYEN[115]GTLQIN[115]R/3	3	6.75	541.598	2993.7	490.211	804.55	b8^2,b12+18^3
O00533	1	YHIYEN[115]GTLQIN[115]R/3	3	6.75	541.598	2993.7	514.262	798.02	y4-17,y4-18
O00587	1	PSLNRPIHASEPQPHN[115]R/3	3	10.03	651.001	2195.8	749.369	10000	y6,a14^2,y13-44^2
O00587	1	PSLNRPIHASEPQPHN[115]R/3	3	10.03	651.001	2195.8	601.817	8596.51	b11^2
O00587	1	PSLNRPIHASEPQPHN[115]R/3	3	10.03	651.001	2195.8	493.78	3388.56	b9^2,b14-44^3,b14-45^3,b14-46^3
O00587	1	PSLNRPIHASEPQPHN[115]R/3	3	10.03	651.001	2195.8	524.258	2767.85	y4,b5-45,a10^2
O00587	1	PSLNRPIHASEPQPHN[115]R/3	3	10.03	651.001	2195.8	965.443	2104	y8
O00587	1	PSLNRPIHASEPQPHN[115]R/3	3	10.03	651.001	2195.8	927.472	1834.51	y16^2
O00587	1	PSLNRPIHASEPQPHN[115]R/3	3	10.03	651.001	2195.8	1202.63	1503.48	b11
O00587	1	PSLNRPIHASEPQPHN[115]R/3	3	10.03	651.001	2195.8	1036.48	1302.45	y9
O00587	1	PSLNRPIHASEPQPHN[115]R/3	3	10.03	651.001	2195.8	827.414	1250.18	y14^2
O00587	1	PSLNRPIHASEPQPHN[115]R/3	3	10.03	651.001	2195.8	714.373	1144.87	b13^2,y6-35
O00587	1	PSLNRPIHASEPQPHN[115]R/4	4	10.03	488.503	2382.7	601.817	10000	b11^2
O00587	1	PSLNRPIHASEPQPHN[115]R/4	4	10.03	488.503	2382.7	524.258	9805.12	y4,b5-45,a10^2
O00587	1	PSLNRPIHASEPQPHN[115]R/4	4	10.03	488.503	2382.7	589.64	3458.54	y15^3
O00587	1	PSLNRPIHASEPQPHN[115]R/4	4	10.03	488.503	2382.7	439.709	3136.17	y7^2,b16-18^4
O00587	1	PSLNRPIHASEPQPHN[115]R/4	4	10.03	488.503	2382.7	618.65	3118.91	y16^3
O00587	1	PSLNRPIHASEPQPHN[115]R/4	4	10.03	488.503	2382.7	714.373	2544.29	b13^2,y6-35
O00587	1	PSLNRPIHASEPQPHN[115]R/4	4	10.03	488.503	2382.7	433.898	1586.4	b12^3,b16-44^4,b16-45^4,b16-46^4,y15-35^4,y15-36^4
O00587	1	PSLNRPIHASEPQPHN[115]R/4	4	10.03	488.503	2382.7	650.344	1337.27	b12^2
O00587	1	PSLNRPIHASEPQPHN[115]R/4	4	10.03	488.503	2382.7	749.369	886.21	y6,a14^2,y13-44^2
O00587	1	PSLNRPIHASEPQPHN[115]R/4	4	10.03	488.503	2382.7	551.945	726.82	y14^3,b5-17
O00587	1	PSLNRPIHASEPQPHN[115]R/5	5	10.03	391.004	2573.4	458.262	10000	b8^2
O00587	1	PSLNRPIHASEPQPHN[115]R/5	5	10.03	391.004	2573.4	464.24	9813.43	y16^4,y8-36^2,b13-35^3,b13-36^3
O00587	1	PSLNRPIHASEPQPHN[115]R/5	5	10.03	391.004	2573.4	524.258	7626.5	y4,b5-45,a10^2
O00587	1	PSLNRPIHASEPQPHN[115]R/5	5	10.03	391.004	2573.4	601.817	3339.42	b11^2
O00587	1	PSLNRPIHASEPQPHN[115]R/5	5	10.03	391.004	2573.4	442.482	3310.61	y15^4
O00587	1	PSLNRPIHASEPQPHN[115]R/5	5	10.03	391.004	2573.4	439.709	2072.83	y7^2,b16-18^4
O00587	1	PSLNRPIHASEPQPHN[115]R/5	5	10.03	391.004	2573.4	483.225	1878.34	y8^2
O00587	1	PSLNRPIHASEPQPHN[115]R/5	5	10.03	391.004	2573.4	518.744	1417.92	y9^2,b10-36^2
O00587	1	PSLNRPIHASEPQPHN[115]R/5	5	10.03	391.004	2573.4	427.205	1171.98	y3,b12-18^3
O00587	1	PSLNRPIHASEPQPHN[115]R/5	5	10.03	391.004	2573.4	461.897	1145.96	y12^3,y8-44^2,b13-44^3,b13-45^3,b13-46^3
O00592	1	QLVLN[115]LTGN/2	2	5.53	486.772	3944.4	682.413	5381.34	b6
O00592	1	QLVLN[115]LTGN/2	2	5.53	486.772	3944.4	783.461	3175.55	b7
O00592	1	QLVLN[115]LTGN/2	2	5.53	486.772	3944.4	840.482	2504.85	b8
O00592	1	QLVLN[115]LTGN/2	2	5.53	486.772	3944.4	454.302	1236.86	b4
O00592	1	QLVLN[115]LTGN/2	2	5.53	486.772	3944.4	632.325	999.83	y6
O00592	1	QLVLN[115]LTGN/2	2	5.53	486.772	3944.4	519.241	970.19	y5
O00592	1	QLVLN[115]LTGN/2	2	5.53	486.772	3944.4	429.75	647.28	b8+18^2
O00592	1	QLVLN[115]LTGN/2	2	5.53	486.772	3944.4	404.214	486.72	y4,b8-34^2,b8-35^2,y8-36^2
O00592	1	QLVLN[115]LTGN/2	2	5.53	486.772	3944.4	615.298	411.6	y6-17,y6-18
O00592	1	QLVLN[115]LTGN/2	2	5.53	486.772	3944.4	422.742	335.96	y8^2
O00592	1	QLVLN[115]LTGNTLC[160]AGGASDEK/2	2	4.37	1031.51	2813.7	894.362	5562.59	y9,b18^2,y18-35^2
O00592	1	QLVLN[115]LTGNTLC[160]AGGASDEK/2	2	4.37	1031.51	2813.7	1279.56	5260.33	y13
O00592	1	QLVLN[115]LTGNTLC[160]AGGASDEK/2	2	4.37	1031.51	2813.7	663.294	3747.08	y7
O00592	1	QLVLN[115]LTGNTLC[160]AGGASDEK/2	2	4.37	1031.51	2813.7	1380.61	3614.52	y14
O00592	1	QLVLN[115]LTGNTLC[160]AGGASDEK/2	2	4.37	1031.51	2813.7	734.332	3576.87	y8,b15-45^2
O00592	1	QLVLN[115]LTGNTLC[160]AGGASDEK/2	2	4.37	1031.51	2813.7	1007.45	2693.35	y10
O00592	1	QLVLN[115]LTGNTLC[160]AGGASDEK/2	2	4.37	1031.51	2813.7	1108.49	2543.65	y11
O00592	1	QLVLN[115]LTGNTLC[160]AGGASDEK/2	2	4.37	1031.51	2813.7	1222.54	1762.64	y12
O00592	1	QLVLN[115]LTGNTLC[160]AGGASDEK/2	2	4.37	1031.51	2813.7	606.273	1319.6	y6
O00592	1	QLVLN[115]LTGNTLC[160]AGGASDEK/2	2	4.37	1031.51	2813.7	478.214	1283.59	y4,b9^2
O00592	1	QLVLN[115]LTGNTLC[160]AGGASDEK/3	3	4.37	688.009	2853.4	836.422	6024.82	b17^2
O00592	1	QLVLN[115]LTGNTLC[160]AGGASDEK/3	3	4.37	688.009	2853.4	894.362	4743.76	y9,b18^2,y18-35^2
O00592	1	QLVLN[115]LTGNTLC[160]AGGASDEK/3	3	4.37	688.009	2853.4	663.294	3168.51	y7
O00592	1	QLVLN[115]LTGNTLC[160]AGGASDEK/3	3	4.37	688.009	2853.4	734.332	2385.73	y8,b15-45^2
O00592	1	QLVLN[115]LTGNTLC[160]AGGASDEK/3	3	4.37	688.009	2853.4	792.906	2291.12	b16^2
O00592	1	QLVLN[115]LTGNTLC[160]AGGASDEK/3	3	4.37	688.009	2853.4	606.273	2154.98	y6
O00592	1	QLVLN[115]LTGNTLC[160]AGGASDEK/3	3	4.37	688.009	2853.4	664.848	2042.15	b12^2,b6-17
O00592	1	QLVLN[115]LTGNTLC[160]AGGASDEK/3	3	4.37	688.009	2853.4	478.214	1637.06	y4,b9^2
O00592	1	QLVLN[115]LTGNTLC[160]AGGASDEK/3	3	4.37	688.009	2853.4	728.877	1548.6	b14^2,y15-35^2,y15-36^2
O00592	1	QLVLN[115]LTGNTLC[160]AGGASDEK/3	3	4.37	688.009	2853.4	584.832	1533.07	b11^2,b18-34^3,b18-35^3,b18-36^3
O14494	1	IN[115]C[160]SDGYIEYYIC[160]R/2	2	4.37	913.89	2806	1016.49	9339.43	y7,b9-36
O14494	1	IN[115]C[160]SDGYIEYYIC[160]R/2	2	4.37	913.89	2806	903.403	8866.1	y6
O14494	1	IN[115]C[160]SDGYIEYYIC[160]R/2	2	4.37	913.89	2806	611.297	7331.62	y4,b6-36
O14494	1	IN[115]C[160]SDGYIEYYIC[160]R/2	2	4.37	913.89	2806	774.36	5584.99	y5,b7-36
O14494	1	IN[115]C[160]SDGYIEYYIC[160]R/2	2	4.37	913.89	2806	1236.57	4387.21	y9
O14494	1	IN[115]C[160]SDGYIEYYIC[160]R/2	2	4.37	913.89	2806	448.234	4022	y3,a4,a8^2
O14494	1	IN[115]C[160]SDGYIEYYIC[160]R/2	2	4.37	913.89	2806	799.834	3862.05	y12^2
O14494	1	IN[115]C[160]SDGYIEYYIC[160]R/2	2	4.37	913.89	2806	1216.48	3283.69	b10
O14494	1	IN[115]C[160]SDGYIEYYIC[160]R/2	2	4.37	913.89	2806	1379.55	2372.17	b11
O14494	1	IN[115]C[160]SDGYIEYYIC[160]R/2	2	4.37	913.89	2806	1053.42	1663.96	b9
O14494	1	IN[115]C[160]SDGYIEYYIC[160]R/3	3	4.37	609.596	3199.4	591.208	10000	b5,b10-34^2,b10-35^2,b10-36^2
O14494	1	IN[115]C[160]SDGYIEYYIC[160]R/3	3	4.37	609.596	3199.4	811.293	7627.28	b7,y13-91^2
O14494	1	IN[115]C[160]SDGYIEYYIC[160]R/3	3	4.37	609.596	3199.4	774.36	7044.69	y5,b7-36
O14494	1	IN[115]C[160]SDGYIEYYIC[160]R/3	3	4.37	609.596	3199.4	1053.42	6842.6	b9
O14494	1	IN[115]C[160]SDGYIEYYIC[160]R/3	3	4.37	609.596	3199.4	527.213	6616.67	b9^2,y12-17^3,y12-18^3
O14494	1	IN[115]C[160]SDGYIEYYIC[160]R/3	3	4.37	609.596	3199.4	448.234	4487.88	y3,a4,a8^2,b11-34^3,b11-35^3,b11-36^3
O14494	1	IN[115]C[160]SDGYIEYYIC[160]R/3	3	4.37	609.596	3199.4	590.279	4296.35	y8^2
O14494	1	IN[115]C[160]SDGYIEYYIC[160]R/3	3	4.37	609.596	3199.4	924.377	3464.08	b8
O14494	1	IN[115]C[160]SDGYIEYYIC[160]R/3	3	4.37	609.596	3199.4	903.403	2351.03	y6
O14494	1	IN[115]C[160]SDGYIEYYIC[160]R/3	3	4.37	609.596	3199.4	533.559	2047.09	y12^3
O14495	1	FLSVC[160]NPDFSQIN[115]C[160]SEGYIQNYR/3	3	4.37	938.083	3559.3	1046.46	9770.33	y17^2,a18^2
O14495	1	FLSVC[160]NPDFSQIN[115]C[160]SEGYIQNYR/3	3	4.37	938.083	3559.3	913.453	9249.15	y7
O14495	1	FLSVC[160]NPDFSQIN[115]C[160]SEGYIQNYR/3	3	4.37	938.083	3559.3	580.284	6119.62	y4,a5
O14495	1	FLSVC[160]NPDFSQIN[115]C[160]SEGYIQNYR/3	3	4.37	938.083	3559.3	693.368	5793.3	y5,y11-17^2,y11-18^2,a6,b18-44^3
O14495	1	FLSVC[160]NPDFSQIN[115]C[160]SEGYIQNYR/3	3	4.37	938.083	3559.3	866.883	4773.79	y14^2,y7-46,b15-36^2
O14495	1	FLSVC[160]NPDFSQIN[115]C[160]SEGYIQNYR/3	3	4.37	938.083	3559.3	1183.49	3682.27	y19^2
O14495	1	FLSVC[160]NPDFSQIN[115]C[160]SEGYIQNYR/3	3	4.37	938.083	3559.3	856.431	3481.22	y6
O14495	1	FLSVC[160]NPDFSQIN[115]C[160]SEGYIQNYR/3	3	4.37	938.083	3559.3	702.796	3345	y11^2,b6-18
O14495	1	FLSVC[160]NPDFSQIN[115]C[160]SEGYIQNYR/3	3	4.37	938.083	3559.3	1103.48	2808.38	y18^2,a19^2
O14495	1	FLSVC[160]NPDFSQIN[115]C[160]SEGYIQNYR/3	3	4.37	938.083	3559.3	1042.5	2609.65	y8,b18-35^2,b18-36^2
O14498	1	FQAFAN[115]GSLLIPDFGK/2	2	5.83	863.446	3717.1	1163.61	10000	b11
O14498	1	FQAFAN[115]GSLLIPDFGK/2	2	5.83	863.446	3717.1	563.282	8083.92	y5,y11-35^2,y11-36^2
O14498	1	FQAFAN[115]GSLLIPDFGK/2	2	5.83	863.446	3717.1	789.451	2213.1	y7,y15^2,b15^2,b8-34,b8-35
O14498	1	FQAFAN[115]GSLLIPDFGK/2	2	5.83	863.446	3717.1	676.366	1837.27	y6
O14498	1	FQAFAN[115]GSLLIPDFGK/2	2	5.83	863.446	3717.1	1046.59	1429.17	y10
O14498	1	FQAFAN[115]GSLLIPDFGK/2	2	5.83	863.446	3717.1	902.535	1417.31	y8,b9-34,b9-35
O14498	1	FQAFAN[115]GSLLIPDFGK/2	2	5.83	863.446	3717.1	1379.72	1062.15	y13
O14498	1	FQAFAN[115]GSLLIPDFGK/2	2	5.83	863.446	3717.1	1022.53	1019.38	a10
O14498	1	FQAFAN[115]GSLLIPDFGK/2	2	5.83	863.446	3717.1	1135.61	936.79	a11
O14498	1	FQAFAN[115]GSLLIPDFGK/2	2	5.83	863.446	3717.1	1161.62	902.16	y11
O14524	1	LN[115]DTYVNVGLYSTK/2	2	5.83	794.399	2736.8	980.541	10000	y9
O14524	1	LN[115]DTYVNVGLYSTK/2	2	5.83	794.399	2736.8	881.473	9636.32	y8
O14524	1	LN[115]DTYVNVGLYSTK/2	2	5.83	794.399	2736.8	668.361	8144	y6
O14524	1	LN[115]DTYVNVGLYSTK/2	2	5.83	794.399	2736.8	920.436	3927.39	b8
O14524	1	LN[115]DTYVNVGLYSTK/2	2	5.83	794.399	2736.8	767.43	3789.05	y7
O14524	1	LN[115]DTYVNVGLYSTK/2	2	5.83	794.399	2736.8	1143.6	3481.57	y10
O14524	1	LN[115]DTYVNVGLYSTK/2	2	5.83	794.399	2736.8	608.256	3136.33	b5
O14524	1	LN[115]DTYVNVGLYSTK/2	2	5.83	794.399	2736.8	498.256	2103.84	y4
O14524	1	LN[115]DTYVNVGLYSTK/2	2	5.83	794.399	2736.8	1253.6	2083.57	b11
O14524	1	LN[115]DTYVNVGLYSTK/2	2	5.83	794.399	2736.8	611.34	1418.68	y5
O14638	1	N[115]LSC[160]RKPDQHFKPYLTPDLPK/4	4	9.52	639.582	3289.7	756.872	8007.38	b12^2,b19-44^3,b19-45^3,b19-46^3
O14638	1	N[115]LSC[160]RKPDQHFKPYLTPDLPK/4	4	9.52	639.582	3289.7	776.404	3814.65	y19^3
O14638	1	N[115]LSC[160]RKPDQHFKPYLTPDLPK/4	4	9.52	639.582	3289.7	692.825	3631.57	b11^2
O14638	1	N[115]LSC[160]RKPDQHFKPYLTPDLPK/4	4	9.52	639.582	3289.7	728.403	3182.86	y12^2,b18-17^3,b18-18^3
O14638	1	N[115]LSC[160]RKPDQHFKPYLTPDLPK/4	4	9.52	639.582	3289.7	569.329	2930.77	y5,y10-35^2,b19-34^4,b19-35^4,b19-36^4
O14638	1	N[115]LSC[160]RKPDQHFKPYLTPDLPK/4	4	9.52	639.582	3289.7	663	2660.8	b16^3
O14638	1	N[115]LSC[160]RKPDQHFKPYLTPDLPK/4	4	9.52	639.582	3289.7	783.461	2610.83	y7,y13-17^2,y13-18^2,y20-91^3,b13-44^2,b13-45^2
O14638	1	N[115]LSC[160]RKPDQHFKPYLTPDLPK/4	4	9.52	639.582	3289.7	486.732	2325.77	b8^2,y12^3,b16-44^4,b16-45^4,b16-46^4
O14638	1	N[115]LSC[160]RKPDQHFKPYLTPDLPK/4	4	9.52	639.582	3289.7	522.292	2314.41	y9^2,y13-17^3,y13-18^3,b17^4,b13-44^3,b13-45^3,b13-46^3
O14638	1	N[115]LSC[160]RKPDQHFKPYLTPDLPK/4	4	9.52	639.582	3289.7	670.377	2197.77	y6,b11-44^2,b11-45^2,b11-46^2
O14672	1	EGIC[160]NGFTALC[160]PASDPKPN[115]FTDC[160]NR/3	3	4.56	948.079	2882.4	810.36	10000	y14^2
O14672	1	EGIC[160]NGFTALC[160]PASDPKPN[115]FTDC[160]NR/3	3	4.56	948.079	2882.4	1192.03	8867.06	y21^2
O14672	1	EGIC[160]NGFTALC[160]PASDPKPN[115]FTDC[160]NR/3	3	4.56	948.079	2882.4	1032.96	8189.05	y18^2
O14672	1	EGIC[160]NGFTALC[160]PASDPKPN[115]FTDC[160]NR/3	3	4.56	948.079	2882.4	1249.56	7923.66	y10,y22-44^2,y22-45^2,y22-46^2
O14672	1	EGIC[160]NGFTALC[160]PASDPKPN[115]FTDC[160]NR/3	3	4.56	948.079	2882.4	890.375	7917.46	y15^2,b24^3,y7-36,y24-44^3,y24-45^3,y24-46^3
O14672	1	EGIC[160]NGFTALC[160]PASDPKPN[115]FTDC[160]NR/3	3	4.56	948.079	2882.4	982.436	6097.59	y17^2
O14672	1	EGIC[160]NGFTALC[160]PASDPKPN[115]FTDC[160]NR/3	3	4.56	948.079	2882.4	1135	4712.68	y20^2,y9-17,y9-18
O14672	1	EGIC[160]NGFTALC[160]PASDPKPN[115]FTDC[160]NR/3	3	4.56	948.079	2882.4	1106.49	3637.98	y19^2,y9-45,y9-46
O14672	1	EGIC[160]NGFTALC[160]PASDPKPN[115]FTDC[160]NR/3	3	4.56	948.079	2882.4	1024.42	3423.7	y8,y18-17^2,y18-18^2
O14672	1	EGIC[160]NGFTALC[160]PASDPKPN[115]FTDC[160]NR/3	3	4.56	948.079	2882.4	1272.04	2851.23	y22^2
O14672	1	IN[115]TTADEK/2	2	4.37	446.716	1201.8	664.315	3310.7	y6
O14672	1	IN[115]TTADEK/2	2	4.37	446.716	1201.8	779.342	700.66	y7
O14672	1	IN[115]TTADEK/2	2	4.37	446.716	1201.8	431.214	603.91	b4
O14672	1	IN[115]TTADEK/2	2	4.37	446.716	1201.8	617.278	512.96	b6
O14672	1	IN[115]TTADEK/2	2	4.37	446.716	1201.8	563.267	442.44	y5
O14672	1	IN[115]TTADEK/2	2	4.37	446.716	1201.8	462.219	334.71	y4
O14672	1	IN[115]TTADEK/2	2	4.37	446.716	1201.8	416.214	170.16	y4-46
O14672	1	IN[115]TTADEK/2	2	4.37	446.716	1201.8	427.182	151.7	y4-35,y4-36
O14672	1	IN[115]TTADEK/2	2	4.37	446.716	1201.8	403.219	119	a4
O14672	1	IN[115]TTADEK/2	2	4.37	446.716	1201.8	418.23	98.28	y4-44
O14672	1	IN[115]TTADEKDPTN/2	2	4.03	660.302	1158.1	818.353	3755.05	y7
O14672	1	IN[115]TTADEKDPTN/2	2	4.03	660.302	1158.1	989.442	3274.04	b9
O14672	1	IN[115]TTADEKDPTN/2	2	4.03	660.302	1158.1	574.283	1698.79	y5,b6-44
O14672	1	IN[115]TTADEKDPTN/2	2	4.03	660.302	1158.1	990.442	1622.68	b9i,y9
O14672	1	IN[115]TTADEKDPTN/2	2	4.03	660.302	1158.1	546.246	1585.42	y10^2
O14672	1	IN[115]TTADEKDPTN/2	2	4.03	660.302	1158.1	889.39	1544.27	y8
O14672	1	IN[115]TTADEKDPTN/2	2	4.03	660.302	1158.1	703.326	1477.91	y6,b7-44
O14672	1	IN[115]TTADEKDPTN/2	2	4.03	660.302	1158.1	1187.54	1300.92	b11,y11-18
O14672	1	IN[115]TTADEKDPTN/2	2	4.03	660.302	1158.1	502.251	778.04	b5
O14672	1	IN[115]TTADEKDPTN/2	2	4.03	660.302	1158.1	617.278	750.83	b6
O14672	1	IN[115]TTADEKDPTNPF/2	2	4.03	782.362	2716.9	1301.59	10000	b12
O14672	1	IN[115]TTADEKDPTNPF/2	2	4.03	782.362	2716.9	1062.47	2007.4	y9
O14672	1	IN[115]TTADEKDPTNPF/2	2	4.03	782.362	2716.9	989.442	1643.47	b9
O14672	1	IN[115]TTADEKDPTNPF/2	2	4.03	782.362	2716.9	575.282	1416.35	y5,b11-36^2
O14672	1	IN[115]TTADEKDPTNPF/2	2	4.03	782.362	2716.9	818.404	1151.95	y7
O14672	1	IN[115]TTADEKDPTNPF/2	2	4.03	782.362	2716.9	947.447	1106.89	y8
O14672	1	IN[115]TTADEKDPTNPF/2	2	4.03	782.362	2716.9	1187.54	940.13	b11
O14672	1	IN[115]TTADEKDPTNPF/2	2	4.03	782.362	2716.9	746.32	690.28	b7
O14672	1	IN[115]TTADEKDPTNPF/2	2	4.03	782.362	2716.9	690.309	615.26	y6,b13-18^2
O14672	1	IN[115]TTADEKDPTNPF/2	2	4.03	782.362	2716.9	874.415	508.69	b8
O14672	1	IN[115]TTADEKDPTNPFR/2	2	4.56	860.413	1539.6	731.384	10000	y6
O14672	1	IN[115]TTADEKDPTNPFR/2	2	4.56	860.413	1539.6	746.32	6083.55	b7,y13^2
O14672	1	IN[115]TTADEKDPTNPFR/2	2	4.56	860.413	1539.6	989.442	4815.65	b9
O14672	1	IN[115]TTADEKDPTNPFR/2	2	4.56	860.413	1539.6	1103.55	1878.05	y9
O14672	1	IN[115]TTADEKDPTNPFR/2	2	4.56	860.413	1539.6	846.41	1599.06	y7,a8
O14672	1	IN[115]TTADEKDPTNPFR/2	2	4.56	860.413	1539.6	974.505	1321.77	y8
O14672	1	IN[115]TTADEKDPTNPFR/2	2	4.56	860.413	1539.6	1301.59	992.43	b12
O14672	1	IN[115]TTADEKDPTNPFR/2	2	4.56	860.413	1539.6	1218.57	726.05	y10
O14672	1	IN[115]TTADEKDPTNPFR/2	2	4.56	860.413	1539.6	419.24	673.78	y3,b8-35^2,b8-36^2
O14672	1	IN[115]TTADEKDPTNPFR/2	2	4.56	860.413	1539.6	617.278	434.99	b6,y5-17,y5-18
O14672	1	IN[115]TTADEKDPTNPFR/3	3	4.56	573.944	1791.2	746.357	10000	y13^2,b7
O14672	1	IN[115]TTADEKDPTNPFR/3	3	4.56	573.944	1791.2	695.833	3515.09	y12^2,y6-35,y6-36
O14672	1	IN[115]TTADEKDPTNPFR/3	3	4.56	573.944	1791.2	645.31	3387.78	y11^2
O14672	1	IN[115]TTADEKDPTNPFR/3	3	4.56	573.944	1791.2	803.871	3206.88	y14^2
O14672	1	IN[115]TTADEKDPTNPFR/3	3	4.56	573.944	1791.2	609.791	2529.84	y10^2
O14672	1	IN[115]TTADEKDPTNPFR/3	3	4.56	573.944	1791.2	552.278	2187.15	y9^2
O14672	1	IN[115]TTADEKDPTNPFR/3	3	4.56	573.944	1791.2	487.756	1558.4	y8^2,y4-45,y4-46
O14672	1	IN[115]TTADEKDPTNPFR/3	3	4.56	573.944	1791.2	989.442	1336.2	b9
O14672	1	IN[115]TTADEKDPTNPFR/3	3	4.56	573.944	1791.2	533.283	1304.08	y4,y9-36^2
O14672	1	IN[115]TTADEKDPTNPFR/3	3	4.56	573.944	1791.2	731.384	1100.57	y6
[truncated: 79,129 more rows]

## Sheet: Table D
Protein	Peptide	Isotopic label	Q1 m/z	Q1 charge	Ions	Q2 m/z	Q2 charge
[truncated: 44 more rows]
